# Supplementary material for: Trends in the Population Prevalence of People Who Inject Drugs in US Metropolitan Areas 1992–2007
Source: PubMed Central journal article supplement (PMC3673953; doi:10.1371/journal.pone.0064789), 2013-06-05
Supplement: pone.0064789.s002.pdf [file pone.0064789.s002.pdf]

| Metropolitan Statistical Area | PWID Population | Year  | Number             | Min   | Max   | Rank  | Rate  | Min   | Max   | Rank  |       |    |
|-------------------------------|-----------------|-------|--------------------|-------|-------|-------|-------|-------|-------|-------|-------|----|
| Akron, OH                     | Total           | 1992  | 2,755              | 1,862 | 3,589 | 92    | 62.20 | 42.03 | 81.01 | 89    |       |    |
|                               |                 | 1993  | 2,386              | 1,457 | 3,548 | 93    | 53.68 | 32.79 | 79.84 | 92    |       |    |
|                               |                 | 1994  | 2,639              | 1,771 | 3,511 | 93    | 59.14 | 39.68 | 78.67 | 89    |       |    |
|                               |                 | 1995  | 2,316              | 1,497 | 3,481 | 94    | 51.58 | 33.34 | 77.50 | 92    |       |    |
|                               |                 | 1996  | 2,292              | 1,524 | 3,462 | 93    | 50.61 | 33.64 | 76.44 | 91    |       |    |
|                               |                 | 1997  | 2,256              | 1,544 | 3,423 | 93    | 49.67 | 34.00 | 75.38 | 91    |       |    |
|                               |                 | 1998  | 2,221              | 1,564 | 3,392 | 93    | 48.78 | 34.35 | 74.51 | 93    |       |    |
|                               |                 | 1999  | 2,389              | 1,566 | 3,364 | 93    | 52.31 | 34.28 | 73.64 | 93    |       |    |
|                               |                 | 2000  | 2,183              | 1,571 | 3,397 | 94    | 47.53 | 34.21 | 73.96 | 95    |       |    |
|                               |                 | 2001  | 2,371              | 1,578 | 3,433 | 94    | 51.30 | 34.14 | 74.27 | 93    |       |    |
|                               |                 | 2002  | 2,202              | 1,592 | 3,488 | 95    | 47.39 | 34.27 | 75.08 | 95    |       |    |
|                               |                 | 2003  | 2,213              | 1,606 | 3,540 | 96    | 47.44 | 34.41 | 75.88 | 95    |       |    |
|                               |                 | 2004  | 2,228              | 1,618 | 3,596 | 96    | 47.55 | 34.55 | 76.76 | 95    |       |    |
|                               |                 | 2005  | 2,244              | 1,632 | 3,655 | 98    | 47.68 | 34.68 | 77.65 | 95    |       |    |
|                               |                 | 2006  | 2,260              | 1,645 | 3,717 | 98    | 47.88 | 34.84 | 78.74 | 95    |       |    |
|                               |                 | 2007  | 2,277              | 1,657 | 3,778 | 99    | 48.10 | 35.01 | 79.82 | 95    |       |    |
|                               |                 |       | Non-Hispanic White | 1992  | 1,793 | 1,212 | 2,336 | 87    | 45.81 | 30.96 | 59.67 | 81 |
|                               |                 |       |                    | 1993  | 1,463 | 894   | 2,176 | 92    | 37.35 | 22.81 | 55.55 | 85 |
|                               |                 |       |                    | 1994  | 1,550 | 1,040 | 2,062 | 93    | 39.49 | 26.50 | 52.53 | 85 |
|                               |                 |       |                    | 1995  | 1,325 | 857   | 1,991 | 94    | 33.64 | 21.75 | 50.54 | 88 |
| 1996                          | 1,298           |       |                    | 863   | 1,961 | 95    | 32.77 | 21.78 | 49.49 | 88    |       |    |
| 1997                          | 1,284           |       |                    | 879   | 1,948 | 94    | 32.39 | 22.17 | 49.16 | 88    |       |    |
| 1998                          | 1,284           |       |                    | 904   | 1,962 | 94    | 32.40 | 22.81 | 49.48 | 88    |       |    |
| 1999                          | 1,416           |       |                    | 928   | 1,994 | 93    | 35.71 | 23.40 | 50.27 | 91    |       |    |
| 2000                          | 1,334           |       |                    | 960   | 2,075 | 94    | 33.53 | 24.13 | 52.18 | 89    |       |    |
| 2001                          | 1,497           |       |                    | 996   | 2,167 | 93    | 37.49 | 24.95 | 54.29 | 91    |       |    |
| 2002                          | 1,437           |       |                    | 1,039 | 2,276 | 95    | 35.89 | 25.96 | 56.85 | 91    |       |    |
| 2003                          | 1,489           |       |                    | 1,080 | 2,382 | 95    | 37.14 | 26.94 | 59.41 | 89    |       |    |
| 2004                          | 1,541           |       |                    | 1,119 | 2,487 | 95    | 38.37 | 27.87 | 61.94 | 89    |       |    |
| 2005                          | 1,588           |       |                    | 1,155 | 2,586 | 96    | 39.47 | 28.71 | 64.28 | 89    |       |    |
| 2006                          | 1,626           |       |                    | 1,183 | 2,674 | 96    | 40.43 | 29.42 | 66.48 | 87    |       |    |
| 2007                          | 1,655           | 1,204 | 2,746              | 93    | 41.14 | 29.94 | 68.27 | 88    |       |       |       |    |

| Metropolitan Statistical Area | PWID Population    | Year | Number   | Min  | Max   | Rank  | Rate   | Min    | Max    | Rank  |        |    |
|-------------------------------|--------------------|------|----------|------|-------|-------|--------|--------|--------|-------|--------|----|
| Akron, OH                     | Non-Hispanic Black | 1992 | 859      | 580  | 1,118 | 82    | 200.48 | 135.47 | 261.11 | 76    |        |    |
|                               |                    | 1993 | 814      | 497  | 1,211 | 84    | 186.59 | 113.96 | 277.50 | 73    |        |    |
|                               |                    | 1994 | 951      | 638  | 1,264 | 78    | 214.04 | 143.60 | 284.70 | 67    |        |    |
|                               |                    | 1995 | 854      | 552  | 1,283 | 75    | 188.13 | 121.62 | 282.67 | 66    |        |    |
|                               |                    | 1996 | 844      | 561  | 1,274 | 74    | 181.75 | 120.83 | 274.51 | 65    |        |    |
|                               |                    | 1997 | 811      | 555  | 1,231 | 73    | 171.80 | 117.59 | 260.73 | 64    |        |    |
|                               |                    | 1998 | 765      | 539  | 1,169 | 75    | 159.88 | 112.59 | 244.23 | 67    |        |    |
|                               |                    | 1999 | 776      | 509  | 1,093 | 74    | 159.48 | 104.51 | 224.53 | 69    |        |    |
|                               |                    | 2000 | 660      | 475  | 1,027 | 77    | 132.88 | 95.64  | 206.76 | 72    |        |    |
|                               |                    | 2001 | 660      | 439  | 955   | 77    | 130.64 | 86.94  | 189.16 | 71    |        |    |
|                               |                    | 2002 | 560      | 405  | 887   | 82    | 109.12 | 78.91  | 172.86 | 73    |        |    |
|                               |                    | 2003 | 514      | 373  | 822   | 84    | 98.58  | 71.51  | 157.68 | 75    |        |    |
|                               |                    | 2004 | 474      | 344  | 765   | 85    | 89.55  | 65.06  | 144.57 | 80    |        |    |
|                               |                    | 2005 | 442      | 321  | 719   | 87    | 82.03  | 59.66  | 133.58 | 81    |        |    |
|                               |                    | 2006 | 418      | 304  | 688   | 88    | 76.31  | 55.53  | 125.47 | 83    |        |    |
|                               |                    | 2007 | 406      | 295  | 673   | 88    | 72.78  | 52.96  | 120.76 | 85    |        |    |
|                               |                    |      | Hispanic | 1992 | 17    | 12    | 22     | 97     | 62.42  | 42.18 | 81.30  | 76 |
|                               |                    |      |          | 1993 | 18    | 11    | 27     | 95     | 64.13  | 39.17 | 95.38  | 69 |
|                               |                    |      |          | 1994 | 24    | 16    | 31     | 93     | 79.54  | 53.36 | 105.80 | 63 |
|                               |                    |      |          | 1995 | 22    | 15    | 34     | 94     | 72.46  | 46.84 | 108.87 | 60 |
| 1996                          | 23                 |      |          | 15   | 35    | 94    | 70.49  | 46.86  | 106.47 | 61    |        |    |
| 1997                          | 22                 |      |          | 15   | 34    | 95    | 66.13  | 45.26  | 100.36 | 63    |        |    |
| 1998                          | 21                 |      |          | 15   | 32    | 96    | 59.91  | 42.19  | 91.51  | 66    |        |    |
| 1999                          | 21                 |      |          | 14   | 29    | 97    | 57.02  | 37.37  | 80.28  | 67    |        |    |
| 2000                          | 17                 |      |          | 12   | 27    | 98    | 44.78  | 32.23  | 69.68  | 71    |        |    |
| 2001                          | 17                 |      |          | 11   | 24    | 97    | 41.28  | 27.47  | 59.77  | 75    |        |    |
| 2002                          | 14                 |      |          | 10   | 22    | 98    | 32.73  | 23.67  | 51.85  | 80    |        |    |
| 2003                          | 13                 |      |          | 9    | 20    | 99    | 28.45  | 20.64  | 45.50  | 82    |        |    |
| 2004                          | 12                 |      |          | 8    | 19    | 100   | 25.34  | 18.41  | 40.90  | 87    |        |    |
| 2005                          | 11                 |      |          | 8    | 18    | 100   | 22.74  | 16.54  | 37.02  | 88    |        |    |
| 2006                          | 11                 |      |          | 8    | 18    | 100   | 21.50  | 15.64  | 35.35  | 91    |        |    |
| 2007                          | 11                 | 8    | 18       | 101  | 21.34 | 15.53 | 35.42  | 92     |        |       |        |    |

| Metropolitan Statistical Area | PWID Population | Year   | Number | Min   | Max   | Rank  | Rate  | Min    | Max    | Rank  |    |
|-------------------------------|-----------------|--------|--------|-------|-------|-------|-------|--------|--------|-------|----|
| Akron, OH                     | Male            | 1992   | 1,746  | 1,180 | 2,274 | 94    | 80.76 | 54.57  | 105.19 | 91    |    |
|                               |                 | 1993   | 1,520  | 928   | 2,260 | 94    | 69.97 | 42.74  | 104.06 | 92    |    |
|                               |                 | 1994   | 1,680  | 1,127 | 2,234 | 93    | 76.99 | 51.65  | 102.41 | 89    |    |
|                               |                 | 1995   | 1,465  | 947   | 2,201 | 94    | 66.69 | 43.11  | 100.20 | 92    |    |
|                               |                 | 1996   | 1,435  | 954   | 2,168 | 94    | 64.76 | 43.05  | 97.82  | 92    |    |
|                               |                 | 1997   | 1,394  | 954   | 2,116 | 94    | 62.75 | 42.95  | 95.23  | 92    |    |
|                               |                 | 1998   | 1,353  | 953   | 2,067 | 94    | 60.73 | 42.77  | 92.77  | 92    |    |
|                               |                 | 1999   | 1,434  | 940   | 2,019 | 95    | 64.14 | 42.03  | 90.29  | 93    |    |
|                               |                 | 2000   | 1,292  | 930   | 2,011 | 96    | 57.47 | 41.36  | 89.42  | 95    |    |
|                               |                 | 2001   | 1,388  | 923   | 2,009 | 96    | 61.29 | 40.79  | 88.74  | 96    |    |
|                               |                 | 2002   | 1,279  | 925   | 2,026 | 98    | 56.18 | 40.63  | 88.99  | 95    |    |
|                               |                 | 2003   | 1,283  | 931   | 2,053 | 99    | 56.07 | 40.68  | 89.69  | 95    |    |
|                               |                 | 2004   | 1,298  | 943   | 2,096 | 99    | 56.49 | 41.04  | 91.20  | 95    |    |
|                               |                 | 2005   | 1,326  | 964   | 2,159 | 99    | 57.36 | 41.72  | 93.41  | 95    |    |
|                               | 2006            | 1,366  | 994    | 2,246 | 99    | 58.87 | 42.84 | 96.81  | 96     |       |    |
|                               | 2007            | 1,421  | 1,034  | 2,357 | 99    | 61.07 | 44.45 | 101.35 | 95     |       |    |
|                               |                 | Female | 1992   | 1,039 | 702   | 1,353 | 86    | 45.79  | 30.94  | 59.64 | 82 |
|                               |                 |        | 1993   | 890   | 544   | 1,324 | 91    | 39.17  | 23.92  | 58.25 | 84 |
|                               |                 |        | 1994   | 988   | 663   | 1,314 | 91    | 43.31  | 29.05  | 57.61 | 85 |
|                               |                 |        | 1995   | 880   | 569   | 1,322 | 92    | 38.34  | 24.78  | 57.60 | 87 |
|                               |                 |        | 1996   | 890   | 591   | 1,344 | 93    | 38.46  | 25.57  | 58.09 | 87 |
|                               |                 |        | 1997   | 899   | 615   | 1,365 | 93    | 38.77  | 26.54  | 58.84 | 87 |
|                               |                 |        | 1998   | 911   | 641   | 1,391 | 93    | 39.18  | 27.59  | 59.84 | 88 |
|                               |                 |        | 1999   | 1,007 | 660   | 1,418 | 91    | 43.20  | 28.31  | 60.81 | 88 |
|                               |                 |        | 2000   | 942   | 678   | 1,466 | 94    | 40.21  | 28.94  | 62.56 | 87 |
|                               |                 |        | 2001   | 1,042 | 694   | 1,509 | 92    | 44.20  | 29.42  | 64.00 | 87 |
|                               | 2002            |        | 978    | 707   | 1,549 | 95    | 41.27 | 29.85  | 65.38  | 85    |    |
|                               | 2003            |        | 982    | 713   | 1,571 | 95    | 41.32 | 29.98  | 66.10  | 85    |    |
|                               | 2004            | 975    | 709    | 1,575 | 96    | 40.87 | 29.69 | 65.98  | 85     |       |    |
|                               | 2005            | 954    | 694    | 1,554 | 96    | 39.83 | 28.97 | 64.87  | 87     |       |    |
|                               | 2006            | 915    | 666    | 1,504 | 96    | 38.11 | 27.73 | 62.66  | 89     |       |    |
|                               | 2007            | 856    | 623    | 1,420 | 97    | 35.56 | 25.88 | 59.00  | 92     |       |    |

| Metropolitan Statistical Area | PWID Population | Year | Number      | Min   | Max   | Rank  | Rate  | Min   | Max    | Rank  |       |    |
|-------------------------------|-----------------|------|-------------|-------|-------|-------|-------|-------|--------|-------|-------|----|
| Akron, OH                     | Young (15-29)   | 1992 | 561         | 379   | 730   | 96    | 37.50 | 25.34 | 48.84  | 94    |       |    |
|                               |                 | 1993 | 423         | 258   | 628   | 98    | 28.84 | 17.62 | 42.89  | 98    |       |    |
|                               |                 | 1994 | 430         | 288   | 572   | 98    | 29.78 | 19.98 | 39.62  | 97    |       |    |
|                               |                 | 1995 | 365         | 236   | 549   | 99    | 25.49 | 16.48 | 38.30  | 98    |       |    |
|                               |                 | 1996 | 366         | 243   | 553   | 98    | 25.54 | 16.98 | 38.57  | 98    |       |    |
|                               |                 | 1997 | 380         | 260   | 576   | 98    | 26.71 | 18.28 | 40.53  | 99    |       |    |
|                               |                 | 1998 | 407         | 286   | 621   | 99    | 28.85 | 20.32 | 44.08  | 99    |       |    |
|                               |                 | 1999 | 487         | 319   | 686   | 98    | 34.85 | 22.84 | 49.07  | 96    |       |    |
|                               |                 | 2000 | 503         | 362   | 783   | 98    | 36.25 | 26.09 | 56.41  | 97    |       |    |
|                               |                 | 2001 | 622         | 414   | 901   | 97    | 44.89 | 29.88 | 65.01  | 92    |       |    |
|                               |                 | 2002 | 658         | 476   | 1,042 | 98    | 47.38 | 34.27 | 75.06  | 88    |       |    |
|                               |                 | 2003 | 747         | 542   | 1,195 | 96    | 53.32 | 38.68 | 85.29  | 86    |       |    |
|                               |                 | 2004 | 839         | 610   | 1,355 | 96    | 59.36 | 43.13 | 95.84  | 82    |       |    |
|                               |                 | 2005 | 929         | 675   | 1,512 | 96    | 64.90 | 47.20 | 105.69 | 80    |       |    |
|                               |                 | 2006 | 1,007       | 733   | 1,656 | 94    | 70.01 | 50.95 | 115.12 | 76    |       |    |
|                               |                 | 2007 | 1,069       | 778   | 1,774 | 93    | 73.69 | 53.63 | 122.28 | 71    |       |    |
|                               |                 |      | Old (30-64) | 1992  | 2,249 | 1,519 | 2,929 | 89    | 76.62  | 51.77 | 99.79 | 86 |
|                               |                 |      |             | 1993  | 1,993 | 1,217 | 2,965 | 91    | 66.92  | 40.87 | 99.52 | 87 |
|                               |                 |      |             | 1994  | 2,235 | 1,500 | 2,973 | 92    | 74.02  | 49.66 | 98.46 | 85 |
|                               |                 |      |             | 1995  | 1,973 | 1,275 | 2,964 | 89    | 64.50  | 41.70 | 96.91 | 85 |
| 1996                          | 1,951           |      |             | 1,297 | 2,946 | 89    | 63.02 | 41.90 | 95.19  | 86    |       |    |
| 1997                          | 1,906           |      |             | 1,305 | 2,893 | 89    | 61.12 | 41.83 | 92.75  | 86    |       |    |
| 1998                          | 1,852           |      |             | 1,304 | 2,829 | 89    | 58.93 | 41.50 | 90.01  | 86    |       |    |
| 1999                          | 1,954           |      |             | 1,280 | 2,750 | 91    | 61.62 | 40.38 | 86.75  | 86    |       |    |
| 2000                          | 1,736           |      |             | 1,249 | 2,701 | 91    | 54.16 | 38.98 | 84.27  | 88    |       |    |
| 2001                          | 1,818           |      |             | 1,210 | 2,632 | 95    | 56.15 | 37.37 | 81.31  | 87    |       |    |
| 2002                          | 1,611           |      |             | 1,165 | 2,551 | 94    | 49.43 | 35.75 | 78.30  | 89    |       |    |
| 2003                          | 1,527           |      |             | 1,108 | 2,443 | 95    | 46.78 | 33.93 | 74.83  | 92    |       |    |
| 2004                          | 1,432           |      |             | 1,040 | 2,312 | 95    | 43.79 | 31.81 | 70.69  | 93    |       |    |
| 2005                          | 1,327           |      |             | 965   | 2,161 | 97    | 40.51 | 29.46 | 65.97  | 94    |       |    |
| 2006                          | 1,214           |      |             | 883   | 1,996 | 98    | 36.98 | 26.91 | 60.80  | 94    |       |    |
| 2007                          | 1,098           | 799  | 1,822       | 98    | 33.45 | 24.34 | 55.50 | 94    |        |       |       |    |



| Metropolitan Statistical Area | PWID Population | Year | Number             | Min   | Max   | Rank  | Rate  | Min   | Max    | Rank  |       |    |
|-------------------------------|-----------------|------|--------------------|-------|-------|-------|-------|-------|--------|-------|-------|----|
| Albany--Schenectady--Troy, NY | Total           | 1992 | 3,829              | 2,594 | 4,474 | 84    | 66.55 | 45.08 | 77.75  | 83    |       |    |
|                               |                 | 1993 | 3,376              | 2,355 | 4,392 | 85    | 58.66 | 40.92 | 76.32  | 83    |       |    |
|                               |                 | 1994 | 3,419              | 2,139 | 4,331 | 86    | 59.38 | 37.15 | 75.22  | 86    |       |    |
|                               |                 | 1995 | 3,174              | 1,919 | 4,259 | 86    | 55.23 | 33.39 | 74.11  | 85    |       |    |
|                               |                 | 1996 | 3,092              | 1,734 | 4,210 | 88    | 53.98 | 30.28 | 73.50  | 86    |       |    |
|                               |                 | 1997 | 3,021              | 1,554 | 4,169 | 88    | 52.83 | 27.17 | 72.89  | 86    |       |    |
|                               |                 | 1998 | 3,089              | 1,641 | 4,297 | 88    | 53.86 | 28.60 | 74.91  | 84    |       |    |
|                               |                 | 1999 | 2,891              | 1,727 | 4,425 | 89    | 50.25 | 30.03 | 76.92  | 94    |       |    |
|                               |                 | 2000 | 3,430              | 1,976 | 4,733 | 86    | 59.28 | 34.15 | 81.80  | 77    |       |    |
|                               |                 | 2001 | 3,157              | 2,174 | 5,061 | 89    | 54.06 | 37.24 | 86.68  | 91    |       |    |
|                               |                 | 2002 | 4,131              | 2,026 | 6,493 | 85    | 69.99 | 34.33 | 109.99 | 67    |       |    |
|                               |                 | 2003 | 4,461              | 1,893 | 7,197 | 83    | 74.57 | 31.65 | 120.31 | 65    |       |    |
|                               |                 | 2004 | 4,643              | 1,765 | 7,387 | 83    | 76.76 | 29.18 | 122.13 | 64    |       |    |
|                               |                 | 2005 | 4,619              | 1,643 | 6,742 | 83    | 75.63 | 26.90 | 110.40 | 64    |       |    |
|                               |                 | 2006 | 4,570              | 1,529 | 6,984 | 83    | 74.05 | 24.77 | 113.15 | 66    |       |    |
|                               |                 | 2007 | 4,476              | 1,406 | 7,343 | 83    | 72.15 | 22.66 | 118.36 | 68    |       |    |
|                               |                 |      | Non-Hispanic White | 1992  | 1,805 | 1,223 | 2,109 | 86    | 34.31  | 23.24 | 40.09 | 94 |
|                               |                 |      |                    | 1993  | 1,671 | 1,165 | 2,173 | 87    | 31.86  | 22.23 | 41.45 | 89 |
|                               |                 |      |                    | 1994  | 1,735 | 1,085 | 2,197 | 86    | 33.19  | 20.76 | 42.04 | 95 |
|                               |                 |      |                    | 1995  | 1,621 | 980   | 2,175 | 87    | 31.19  | 18.86 | 41.86 | 91 |
| 1996                          | 1,568           |      |                    | 879   | 2,135 | 88    | 30.39 | 17.05 | 41.38  | 92    |       |    |
| 1997                          | 1,505           |      |                    | 774   | 2,076 | 89    | 29.33 | 15.08 | 40.46  | 93    |       |    |
| 1998                          | 1,500           |      |                    | 796   | 2,086 | 89    | 29.25 | 15.53 | 40.68  | 94    |       |    |
| 1999                          | 1,361           |      |                    | 813   | 2,084 | 94    | 26.57 | 15.87 | 40.66  | 97    |       |    |
| 2000                          | 1,565           |      |                    | 901   | 2,159 | 92    | 30.46 | 17.55 | 42.04  | 95    |       |    |
| 2001                          | 1,398           |      |                    | 963   | 2,241 | 95    | 27.07 | 18.65 | 43.41  | 96    |       |    |
| 2002                          | 1,787           |      |                    | 876   | 2,808 | 91    | 34.41 | 16.88 | 54.07  | 93    |       |    |
| 2003                          | 1,904           |      |                    | 808   | 3,072 | 88    | 36.34 | 15.42 | 58.63  | 92    |       |    |
| 2004                          | 1,984           |      |                    | 754   | 3,157 | 86    | 37.60 | 14.29 | 59.82  | 92    |       |    |
| 2005                          | 2,011           |      |                    | 715   | 2,936 | 85    | 37.87 | 13.47 | 55.29  | 92    |       |    |
| 2006                          | 2,068           |      |                    | 692   | 3,160 | 85    | 38.71 | 12.95 | 59.16  | 92    |       |    |
| 2007                          | 2,147           | 674  | 3,522              | 86    | 40.12 | 12.60 | 65.81 | 89    |        |       |       |    |

| Metropolitan Statistical Area | PWID Population    | Year | Number   | Min  | Max    | Rank   | Rate   | Min    | Max    | Rank   |        |   |
|-------------------------------|--------------------|------|----------|------|--------|--------|--------|--------|--------|--------|--------|---|
| Albany--Schenectady--Troy, NY | Non-Hispanic Black | 1992 | 1,278    | 866  | 1,494  | 65     | 458.96 | 310.93 | 536.25 | 21     |        |   |
|                               |                    | 1993 | 1,078    | 752  | 1,403  | 71     | 373.59 | 260.58 | 486.01 | 31     |        |   |
|                               |                    | 1994 | 1,048    | 656  | 1,328  | 69     | 351.16 | 219.71 | 444.78 | 31     |        |   |
|                               |                    | 1995 | 937      | 566  | 1,257  | 71     | 304.80 | 184.26 | 409.01 | 34     |        |   |
|                               |                    | 1996 | 880      | 494  | 1,199  | 71     | 278.65 | 156.33 | 379.46 | 37     |        |   |
|                               |                    | 1997 | 831      | 427  | 1,147  | 71     | 256.01 | 131.68 | 353.22 | 37     |        |   |
|                               |                    | 1998 | 821      | 436  | 1,143  | 72     | 246.05 | 130.66 | 342.21 | 36     |        |   |
|                               |                    | 1999 | 743      | 444  | 1,137  | 75     | 216.81 | 129.55 | 331.86 | 44     |        |   |
|                               |                    | 2000 | 852      | 491  | 1,175  | 67     | 242.47 | 139.70 | 334.58 | 28     |        |   |
|                               |                    | 2001 | 756      | 521  | 1,212  | 72     | 208.52 | 143.62 | 334.30 | 37     |        |   |
|                               |                    | 2002 | 952      | 467  | 1,497  | 65     | 253.31 | 124.25 | 398.11 | 19     |        |   |
|                               |                    | 2003 | 987      | 419  | 1,592  | 64     | 253.95 | 107.79 | 409.74 | 18     |        |   |
|                               |                    | 2004 | 983      | 373  | 1,563  | 65     | 246.39 | 93.65  | 391.99 | 18     |        |   |
|                               |                    | 2005 | 932      | 331  | 1,360  | 66     | 228.75 | 81.36  | 333.95 | 21     |        |   |
|                               |                    | 2006 | 876      | 293  | 1,338  | 68     | 208.57 | 69.78  | 318.73 | 28     |        |   |
|                               |                    | 2007 | 813      | 255  | 1,334  | 74     | 189.63 | 59.56  | 311.08 | 38     |        |   |
|                               |                    |      | Hispanic | 1992 | 586    | 397    | 685    | 48     | 533.74 | 361.59 | 623.62 | 6 |
|                               |                    |      |          | 1993 | 491    | 342    | 638    | 49     | 427.52 | 298.20 | 556.17 | 8 |
|                               |                    |      |          | 1994 | 488    | 305    | 618    | 53     | 406.95 | 254.61 | 515.45 | 8 |
|                               |                    |      |          | 1995 | 457    | 276    | 613    | 54     | 365.11 | 220.72 | 489.95 | 9 |
| 1996                          | 459                |      |          | 258  | 626    | 54     | 353.49 | 198.32 | 481.37 | 9      |        |   |
| 1997                          | 471                |      |          | 242  | 650    | 56     | 347.53 | 178.76 | 479.49 | 11     |        |   |
| 1998                          | 511                |      |          | 272  | 711    | 55     | 362.79 | 192.66 | 504.58 | 9      |        |   |
| 1999                          | 511                |      |          | 305  | 782    | 55     | 349.09 | 208.59 | 534.34 | 9      |        |   |
| 2000                          | 648                |      |          | 373  | 894    | 53     | 420.93 | 242.52 | 580.85 | 6      |        |   |
| 2001                          | 635                |      |          | 437  | 1,018  | 55     | 394.99 | 272.05 | 633.26 | 8      |        |   |
| 2002                          | 878                |      |          | 431  | 1,379  | 49     | 517.88 | 254.02 | 813.91 | 5      |        |   |
| 2003                          | 989                |      |          | 420  | 1,596  | 48     | 553.77 | 235.04 | 893.48 | 5      |        |   |
| 2004                          | 1,058              |      |          | 402  | 1,683  | 49     | 564.36 | 214.51 | 897.86 | 3      |        |   |
| 2005                          | 1,060              |      |          | 377  | 1,547  | 51     | 545.13 | 193.90 | 795.82 | 3      |        |   |
| 2006                          | 1,032              | 345  | 1,576    | 51   | 503.18 | 168.35 | 768.93 | 2      |        |        |        |   |
| 2007                          | 967                | 304  | 1,586    | 52   | 457.81 | 143.80 | 751.02 | 3      |        |        |        |   |

| Metropolitan Statistical Area | PWID Population | Year   | Number | Min   | Max   | Rank   | Rate   | Min    | Max    | Rank  |    |
|-------------------------------|-----------------|--------|--------|-------|-------|--------|--------|--------|--------|-------|----|
| Albany--Schenectady--Troy, NY | Male            | 1992   | 2,638  | 1,787 | 3,083 | 83     | 92.79  | 62.86  | 108.42 | 83    |    |
|                               |                 | 1993   | 2,351  | 1,640 | 3,058 | 83     | 82.65  | 57.65  | 107.52 | 84    |    |
|                               |                 | 1994   | 2,398  | 1,501 | 3,038 | 85     | 84.27  | 52.72  | 106.73 | 86    |    |
|                               |                 | 1995   | 2,236  | 1,352 | 3,001 | 85     | 78.73  | 47.60  | 105.65 | 83    |    |
|                               |                 | 1996   | 2,184  | 1,225 | 2,974 | 85     | 77.14  | 43.28  | 105.05 | 83    |    |
|                               |                 | 1997   | 2,135  | 1,098 | 2,946 | 86     | 75.53  | 38.85  | 104.20 | 83    |    |
|                               |                 | 1998   | 2,180  | 1,158 | 3,033 | 86     | 76.86  | 40.82  | 106.90 | 81    |    |
|                               |                 | 1999   | 2,035  | 1,216 | 3,115 | 86     | 71.55  | 42.75  | 109.52 | 87    |    |
|                               |                 | 2000   | 2,406  | 1,386 | 3,320 | 85     | 84.10  | 48.46  | 116.05 | 69    |    |
|                               |                 | 2001   | 2,204  | 1,518 | 3,534 | 86     | 76.30  | 52.55  | 122.32 | 81    |    |
|                               |                 | 2002   | 2,870  | 1,408 | 4,510 | 84     | 98.20  | 48.17  | 154.33 | 63    |    |
|                               |                 | 2003   | 3,082  | 1,308 | 4,973 | 78     | 103.95 | 44.12  | 167.72 | 58    |    |
|                               |                 | 2004   | 3,192  | 1,213 | 5,078 | 78     | 106.41 | 40.45  | 169.29 | 58    |    |
|                               |                 | 2005   | 3,159  | 1,124 | 4,612 | 80     | 104.30 | 37.10  | 152.27 | 57    |    |
|                               | 2006            | 3,113  | 1,042  | 4,758 | 78    | 101.67 | 34.01  | 155.36 | 58     |       |    |
|                               | 2007            | 3,040  | 955    | 4,987 | 79    | 98.70  | 31.00  | 161.92 | 61     |       |    |
|                               |                 | Female | 1992   | 1,164 | 788   | 1,360  | 85     | 39.98  | 27.09  | 46.72 | 86 |
|                               |                 |        | 1993   | 1,025 | 715   | 1,333  | 86     | 35.22  | 24.56  | 45.82 | 87 |
|                               |                 |        | 1994   | 1,040 | 650   | 1,317  | 89     | 35.70  | 22.34  | 45.22 | 91 |
|                               |                 |        | 1995   | 968   | 585   | 1,299  | 88     | 33.32  | 20.14  | 44.71 | 91 |
|                               |                 |        | 1996   | 947   | 532   | 1,290  | 89     | 32.71  | 18.35  | 44.54 | 91 |
|                               |                 |        | 1997   | 931   | 479   | 1,285  | 92     | 32.20  | 16.56  | 44.43 | 92 |
|                               |                 |        | 1998   | 958   | 509   | 1,333  | 91     | 33.05  | 17.55  | 45.97 | 92 |
|                               |                 |        | 1999   | 903   | 539   | 1,382  | 95     | 31.04  | 18.55  | 47.51 | 96 |
|                               |                 |        | 2000   | 1,078 | 621   | 1,488  | 89     | 36.84  | 21.23  | 50.84 | 91 |
|                               |                 |        | 2001   | 998   | 687   | 1,600  | 96     | 33.83  | 23.30  | 54.24 | 94 |
|                               | 2002            |        | 1,313  | 644   | 2,063 | 87     | 44.04  | 21.60  | 69.22  | 79    |    |
|                               | 2003            |        | 1,423  | 604   | 2,295 | 86     | 47.15  | 20.01  | 76.07  | 75    |    |
|                               | 2004            | 1,484  | 564    | 2,361 | 86    | 48.66  | 18.49  | 77.41  | 74     |       |    |
|                               | 2005            | 1,476  | 525    | 2,154 | 86    | 47.94  | 17.05  | 69.99  | 77     |       |    |
|                               | 2006            | 1,457  | 487    | 2,226 | 87    | 46.85  | 15.67  | 71.59  | 76     |       |    |
|                               | 2007            | 1,420  | 446    | 2,329 | 87    | 45.45  | 14.28  | 74.56  | 79     |       |    |

| Metropolitan Statistical Area | PWID Population | Year  | Number      | Min   | Max   | Rank  | Rate   | Min   | Max    | Rank  |       |    |
|-------------------------------|-----------------|-------|-------------|-------|-------|-------|--------|-------|--------|-------|-------|----|
| Albany--Schenectady--Troy, NY | Young (15-29)   | 1992  | 816         | 553   | 953   | 87    | 41.73  | 28.27 | 48.75  | 88    |       |    |
|                               |                 | 1993  | 778         | 543   | 1,012 | 86    | 40.91  | 28.53 | 53.22  | 84    |       |    |
|                               |                 | 1994  | 842         | 527   | 1,067 | 85    | 45.34  | 28.37 | 57.43  | 82    |       |    |
|                               |                 | 1995  | 827         | 500   | 1,110 | 84    | 45.50  | 27.51 | 61.06  | 80    |       |    |
|                               |                 | 1996  | 845         | 474   | 1,151 | 86    | 47.51  | 26.66 | 64.71  | 76    |       |    |
|                               |                 | 1997  | 859         | 442   | 1,185 | 87    | 49.07  | 25.24 | 67.71  | 75    |       |    |
|                               |                 | 1998  | 906         | 481   | 1,260 | 87    | 52.25  | 27.75 | 72.67  | 74    |       |    |
|                               |                 | 1999  | 870         | 520   | 1,331 | 89    | 50.63  | 30.26 | 77.51  | 80    |       |    |
|                               |                 | 2000  | 1,052       | 606   | 1,452 | 87    | 61.53  | 35.45 | 84.91  | 71    |       |    |
|                               |                 | 2001  | 983         | 677   | 1,575 | 89    | 56.68  | 39.04 | 90.87  | 80    |       |    |
|                               |                 | 2002  | 1,299       | 637   | 2,042 | 86    | 73.66  | 36.13 | 115.76 | 67    |       |    |
|                               |                 | 2003  | 1,412       | 599   | 2,279 | 83    | 77.72  | 32.99 | 125.40 | 64    |       |    |
|                               |                 | 2004  | 1,475       | 561   | 2,347 | 83    | 79.18  | 30.09 | 125.97 | 64    |       |    |
|                               |                 | 2005  | 1,469       | 523   | 2,145 | 84    | 76.90  | 27.35 | 112.26 | 69    |       |    |
|                               |                 | 2006  | 1,453       | 486   | 2,221 | 84    | 74.17  | 24.82 | 113.34 | 69    |       |    |
|                               |                 | 2007  | 1,422       | 447   | 2,332 | 84    | 71.66  | 22.51 | 117.55 | 73    |       |    |
|                               |                 |       | Old (30-64) | 1992  | 3,059 | 2,073 | 3,575  | 83    | 80.54  | 54.56 | 94.10 | 81 |
|                               |                 |       |             | 1993  | 2,636 | 1,839 | 3,430  | 84    | 68.42  | 47.72 | 89.01 | 86 |
|                               |                 |       |             | 1994  | 2,618 | 1,638 | 3,316  | 86    | 67.12  | 41.99 | 85.02 | 89 |
|                               |                 |       |             | 1995  | 2,390 | 1,445 | 3,208  | 86    | 60.85  | 36.79 | 81.66 | 88 |
| 1996                          | 2,298           |       |             | 1,289 | 3,129 | 87    | 58.18  | 32.64 | 79.23  | 89    |       |    |
| 1997                          | 2,222           |       |             | 1,143 | 3,066 | 87    | 55.98  | 28.79 | 77.23  | 91    |       |    |
| 1998                          | 2,252           |       |             | 1,196 | 3,132 | 87    | 56.27  | 29.88 | 78.27  | 89    |       |    |
| 1999                          | 2,091           |       |             | 1,249 | 3,200 | 87    | 51.82  | 30.96 | 79.32  | 92    |       |    |
| 2000                          | 2,463           |       |             | 1,419 | 3,398 | 87    | 60.41  | 34.80 | 83.36  | 78    |       |    |
| 2001                          | 2,248           |       |             | 1,549 | 3,605 | 87    | 54.76  | 37.72 | 87.80  | 89    |       |    |
| 2002                          | 2,915           |       |             | 1,430 | 4,581 | 81    | 70.42  | 34.54 | 110.68 | 64    |       |    |
| 2003                          | 3,111           |       |             | 1,320 | 5,019 | 79    | 74.69  | 31.70 | 120.50 | 60    |       |    |
| 2004                          | 3,190           |       |             | 1,213 | 5,075 | 79    | 76.22  | 28.97 | 121.26 | 55    |       |    |
| 2005                          | 3,111           |       |             | 1,107 | 4,542 | 79    | 74.15  | 26.37 | 108.25 | 57    |       |    |
| 2006                          | 2,999           | 1,003 | 4,583       | 79    | 71.20 | 23.82 | 108.80 | 59    |        |       |       |    |
| 2007                          | 2,836           | 891   | 4,652       | 80    | 67.20 | 21.11 | 110.25 | 60    |        |       |       |    |

| Metropolitan Statistical Area | PWID Population | Year  | Number             | Min   | Max    | Rank   | Rate   | Min    | Max    | Rank   |        |   |
|-------------------------------|-----------------|-------|--------------------|-------|--------|--------|--------|--------|--------|--------|--------|---|
| Albuquerque, NM               | Total           | 1992  | 10,123             | 5,575 | 17,982 | 44     | 246.38 | 135.70 | 437.68 | 6      |        |   |
|                               |                 | 1993  | 9,203              | 5,536 | 16,737 | 44     | 218.91 | 131.68 | 398.11 | 8      |        |   |
|                               |                 | 1994  | 9,415              | 5,557 | 15,540 | 44     | 216.64 | 127.86 | 357.57 | 10     |        |   |
|                               |                 | 1995  | 8,743              | 5,551 | 14,186 | 46     | 195.38 | 124.05 | 317.02 | 10     |        |   |
|                               |                 | 1996  | 8,422              | 5,489 | 12,774 | 46     | 184.35 | 120.16 | 279.63 | 13     |        |   |
|                               |                 | 1997  | 7,999              | 5,368 | 11,184 | 47     | 173.25 | 116.28 | 242.24 | 13     |        |   |
|                               |                 | 1998  | 7,735              | 5,276 | 10,160 | 51     | 165.33 | 112.77 | 217.17 | 13     |        |   |
|                               |                 | 1999  | 7,271              | 5,151 | 9,057  | 57     | 154.21 | 109.26 | 192.10 | 18     |        |   |
|                               |                 | 2000  | 7,561              | 5,172 | 9,456  | 50     | 158.17 | 108.21 | 197.81 | 14     |        |   |
|                               |                 | 2001  | 7,600              | 5,190 | 9,859  | 54     | 156.89 | 107.15 | 203.53 | 17     |        |   |
|                               |                 | 2002  | 7,932              | 5,225 | 10,663 | 49     | 160.11 | 105.47 | 215.23 | 11     |        |   |
|                               |                 | 2003  | 8,152              | 5,232 | 11,437 | 49     | 161.76 | 103.80 | 226.93 | 13     |        |   |
|                               |                 | 2004  | 8,321              | 5,244 | 11,908 | 49     | 161.77 | 101.95 | 231.51 | 13     |        |   |
|                               |                 | 2005  | 8,513              | 5,269 | 12,428 | 50     | 161.72 | 100.10 | 236.10 | 11     |        |   |
|                               |                 | 2006  | 8,677              | 5,297 | 12,825 | 48     | 160.99 | 98.28  | 237.97 | 11     |        |   |
|                               |                 | 2007  | 8,802              | 5,298 | 13,172 | 48     | 160.26 | 96.46  | 239.83 | 10     |        |   |
|                               |                 |       | Non-Hispanic White | 1992  | 4,547  | 2,504  | 8,077  | 52     | 204.04 | 112.38 | 362.46 | 8 |
|                               |                 |       |                    | 1993  | 4,626  | 2,782  | 8,412  | 48     | 204.45 | 122.98 | 371.81 | 5 |
|                               |                 |       |                    | 1994  | 4,971  | 2,934  | 8,204  | 46     | 213.63 | 126.09 | 352.60 | 4 |
|                               |                 |       |                    | 1995  | 4,645  | 2,949  | 7,536  | 48     | 195.25 | 123.97 | 316.82 | 5 |
| 1996                          | 4,366           |       |                    | 2,846 | 6,623  | 48     | 182.22 | 118.77 | 276.40 | 5      |        |   |
| 1997                          | 3,959           |       |                    | 2,657 | 5,535  | 51     | 165.34 | 110.96 | 231.17 | 5      |        |   |
| 1998                          | 3,606           |       |                    | 2,459 | 4,736  | 57     | 150.80 | 102.86 | 198.08 | 9      |        |   |
| 1999                          | 3,182           |       |                    | 2,254 | 3,963  | 72     | 134.13 | 95.04  | 167.08 | 17     |        |   |
| 2000                          | 3,134           |       |                    | 2,144 | 3,920  | 66     | 132.64 | 90.74  | 165.89 | 15     |        |   |
| 2001                          | 3,056           |       |                    | 2,087 | 3,964  | 73     | 129.40 | 88.37  | 167.85 | 17     |        |   |
| 2002                          | 3,212           |       |                    | 2,116 | 4,317  | 68     | 134.41 | 88.54  | 180.68 | 13     |        |   |
| 2003                          | 3,489           |       |                    | 2,239 | 4,895  | 65     | 144.99 | 93.04  | 203.40 | 9      |        |   |
| 2004                          | 3,964           |       |                    | 2,498 | 5,674  | 56     | 162.54 | 102.43 | 232.61 | 8      |        |   |
| 2005                          | 4,718           |       |                    | 2,920 | 6,888  | 44     | 190.82 | 118.10 | 278.58 | 7      |        |   |
| 2006                          | 5,727           |       |                    | 3,496 | 8,465  | 39     | 228.27 | 139.34 | 337.40 | 5      |        |   |
| 2007                          | 6,874           | 4,137 | 10,287             | 29    | 271.93 | 163.67 | 406.96 | 3      |        |        |        |   |

| Metropolitan Statistical Area | PWID Population    | Year  | Number   | Min   | Max    | Rank   | Rate   | Min    | Max    | Rank   |        |    |
|-------------------------------|--------------------|-------|----------|-------|--------|--------|--------|--------|--------|--------|--------|----|
| Albuquerque, NM               | Non-Hispanic Black | 1992  | 337      | 186   | 599    | 97     | 347.79 | 191.55 | 617.82 | 41     |        |    |
|                               |                    | 1993  | 283      | 170   | 514    | 97     | 280.72 | 168.85 | 510.51 | 51     |        |    |
|                               |                    | 1994  | 267      | 158   | 441    | 97     | 257.09 | 151.74 | 424.33 | 56     |        |    |
|                               |                    | 1995  | 230      | 146   | 373    | 97     | 213.19 | 135.35 | 345.91 | 53     |        |    |
|                               |                    | 1996  | 207      | 135   | 314    | 97     | 185.22 | 120.73 | 280.95 | 63     |        |    |
|                               |                    | 1997  | 185      | 124   | 259    | 97     | 161.66 | 108.49 | 226.03 | 69     |        |    |
|                               |                    | 1998  | 171      | 117   | 225    | 98     | 147.37 | 100.52 | 193.58 | 72     |        |    |
|                               |                    | 1999  | 155      | 110   | 194    | 98     | 131.52 | 93.18  | 163.83 | 77     |        |    |
|                               |                    | 2000  | 159      | 109   | 199    | 98     | 134.10 | 91.74  | 167.71 | 71     |        |    |
|                               |                    | 2001  | 160      | 109   | 208    | 97     | 131.92 | 90.09  | 171.13 | 69     |        |    |
|                               |                    | 2002  | 171      | 113   | 230    | 97     | 135.37 | 89.18  | 181.97 | 66     |        |    |
|                               |                    | 2003  | 185      | 118   | 259    | 96     | 141.59 | 90.86  | 198.64 | 57     |        |    |
|                               |                    | 2004  | 203      | 128   | 290    | 96     | 149.05 | 93.93  | 213.31 | 54     |        |    |
|                               |                    | 2005  | 230      | 142   | 336    | 95     | 161.11 | 99.72  | 235.21 | 45     |        |    |
|                               |                    | 2006  | 269      | 164   | 397    | 95     | 178.35 | 108.87 | 263.62 | 42     |        |    |
|                               |                    | 2007  | 324      | 195   | 485    | 93     | 205.43 | 123.65 | 307.44 | 33     |        |    |
|                               |                    |       | Hispanic | 1992  | 5,454  | 3,004  | 9,688  | 13     | 356.08 | 196.11 | 632.54 | 14 |
|                               |                    |       |          | 1993  | 5,088  | 3,060  | 9,253  | 15     | 322.33 | 193.88 | 586.18 | 13 |
|                               |                    |       |          | 1994  | 5,216  | 3,078  | 8,609  | 13     | 318.02 | 187.70 | 524.89 | 12 |
|                               |                    |       |          | 1995  | 4,764  | 3,025  | 7,731  | 15     | 279.55 | 177.49 | 453.59 | 14 |
| 1996                          | 4,451              |       |          | 2,901 | 6,751  | 15     | 252.18 | 164.37 | 382.50 | 15     |        |    |
| 1997                          | 4,058              |       |          | 2,723 | 5,673  | 16     | 225.06 | 151.04 | 314.66 | 17     |        |    |
| 1998                          | 3,744              |       |          | 2,554 | 4,918  | 18     | 202.41 | 138.06 | 265.87 | 19     |        |    |
| 1999                          | 3,357              |       |          | 2,378 | 4,181  | 19     | 177.55 | 125.80 | 221.17 | 20     |        |    |
| 2000                          | 3,347              |       |          | 2,290 | 4,187  | 22     | 171.76 | 117.50 | 214.81 | 19     |        |    |
| 2001                          | 3,267              |       |          | 2,231 | 4,238  | 20     | 163.18 | 111.44 | 211.67 | 21     |        |    |
| 2002                          | 3,376              |       |          | 2,224 | 4,538  | 20     | 163.42 | 107.66 | 219.68 | 19     |        |    |
| 2003                          | 3,527              |       |          | 2,263 | 4,947  | 20     | 166.51 | 106.85 | 233.59 | 19     |        |    |
| 2004                          | 3,775              |       |          | 2,379 | 5,402  | 18     | 173.74 | 109.49 | 248.64 | 18     |        |    |
| 2005                          | 4,189              |       |          | 2,593 | 6,116  | 17     | 186.98 | 115.73 | 272.99 | 18     |        |    |
| 2006                          | 4,777              | 2,916 | 7,061    | 15    | 206.88 | 126.28 | 305.79 | 17     |        |        |        |    |
| 2007                          | 5,539              | 3,334 | 8,289    | 13    | 233.03 | 140.26 | 348.74 | 16     |        |        |        |    |

| Metropolitan Statistical Area | PWID Population | Year   | Number | Min   | Max    | Rank   | Rate   | Min    | Max    | Rank   |    |
|-------------------------------|-----------------|--------|--------|-------|--------|--------|--------|--------|--------|--------|----|
| Albuquerque, NM               | Male            | 1992   | 6,625  | 3,649 | 11,769 | 44     | 326.07 | 179.58 | 579.23 | 7      |    |
|                               |                 | 1993   | 5,933  | 3,568 | 10,789 | 44     | 285.30 | 171.61 | 518.85 | 9      |    |
|                               |                 | 1994   | 5,999  | 3,540 | 9,901  | 45     | 278.66 | 164.47 | 459.93 | 12     |    |
|                               |                 | 1995   | 5,522  | 3,506 | 8,960  | 44     | 249.10 | 158.16 | 404.19 | 13     |    |
|                               |                 | 1996   | 5,288  | 3,447 | 8,021  | 45     | 233.61 | 152.27 | 354.34 | 13     |    |
|                               |                 | 1997   | 5,003  | 3,357 | 6,994  | 47     | 218.90 | 146.91 | 306.06 | 14     |    |
|                               |                 | 1998   | 4,826  | 3,291 | 6,339  | 54     | 208.36 | 142.12 | 273.69 | 18     |    |
|                               |                 | 1999   | 4,529  | 3,209 | 5,641  | 59     | 194.20 | 137.59 | 241.91 | 21     |    |
|                               |                 | 2000   | 4,703  | 3,217 | 5,882  | 52     | 198.87 | 136.05 | 248.71 | 19     |    |
|                               |                 | 2001   | 4,719  | 3,223 | 6,121  | 54     | 196.62 | 134.28 | 255.06 | 18     |    |
|                               |                 | 2002   | 4,911  | 3,235 | 6,601  | 48     | 199.86 | 131.66 | 268.66 | 16     |    |
|                               |                 | 2003   | 5,024  | 3,224 | 7,048  | 48     | 200.81 | 128.87 | 281.72 | 16     |    |
|                               |                 | 2004   | 5,092  | 3,209 | 7,287  | 49     | 199.24 | 125.56 | 285.13 | 16     |    |
|                               |                 | 2005   | 5,156  | 3,191 | 7,527  | 49     | 196.91 | 121.88 | 287.48 | 16     |    |
|                               | 2006            | 5,180  | 3,162  | 7,657 | 49     | 193.39 | 118.05 | 285.85 | 16     |        |    |
|                               | 2007            | 5,155  | 3,103  | 7,714 | 49     | 188.76 | 113.61 | 282.49 | 16     |        |    |
|                               |                 | Female | 1992   | 3,510 | 1,933  | 6,236  | 42     | 169.03 | 93.09  | 300.27 | 7  |
|                               |                 |        | 1993   | 3,381 | 2,034  | 6,149  | 40     | 159.14 | 95.73  | 289.42 | 7  |
|                               |                 |        | 1994   | 3,613 | 2,133  | 5,964  | 42     | 164.73 | 97.23  | 271.89 | 5  |
|                               |                 |        | 1995   | 3,463 | 2,199  | 5,619  | 40     | 153.38 | 97.38  | 248.87 | 7  |
|                               |                 |        | 1996   | 3,409 | 2,222  | 5,170  | 40     | 147.90 | 96.40  | 224.34 | 8  |
|                               |                 |        | 1997   | 3,281 | 2,202  | 4,587  | 43     | 140.72 | 94.44  | 196.75 | 11 |
|                               |                 |        | 1998   | 3,193 | 2,178  | 4,194  | 43     | 135.16 | 92.19  | 177.54 | 12 |
|                               |                 |        | 1999   | 3,004 | 2,129  | 3,742  | 52     | 126.09 | 89.34  | 157.06 | 11 |
|                               |                 |        | 2000   | 3,113 | 2,130  | 3,894  | 45     | 128.90 | 88.19  | 161.22 | 11 |
|                               |                 |        | 2001   | 3,110 | 2,124  | 4,034  | 49     | 127.23 | 86.89  | 165.05 | 12 |
|                               | 2002            |        | 3,219  | 2,121 | 4,327  | 45     | 128.92 | 84.92  | 173.29 | 9      |    |
|                               | 2003            |        | 3,279  | 2,105 | 4,601  | 45     | 129.21 | 82.91  | 181.26 | 9      |    |
|                               | 2004            | 3,320  | 2,092  | 4,751 | 45     | 128.29 | 80.85  | 183.60 | 9      |        |    |
|                               | 2005            | 3,376  | 2,090  | 4,929 | 45     | 127.61 | 78.98  | 186.31 | 9      |        |    |
|                               | 2006            | 3,432  | 2,095  | 5,072 | 43     | 126.60 | 77.28  | 187.12 | 8      |        |    |
|                               | 2007            | 3,488  | 2,099  | 5,220 | 41     | 126.31 | 76.02  | 189.02 | 11     |        |    |

| Metropolitan Statistical Area | PWID Population | Year  | Number      | Min   | Max    | Rank  | Rate   | Min    | Max    | Rank   |        |    |
|-------------------------------|-----------------|-------|-------------|-------|--------|-------|--------|--------|--------|--------|--------|----|
| Albuquerque, NM               | Young (15-29)   | 1992  | 3,462       | 1,906 | 6,149  | 37    | 254.75 | 140.30 | 452.54 | 3      |        |    |
|                               |                 | 1993  | 3,130       | 1,883 | 5,692  | 34    | 229.17 | 137.85 | 416.77 | 5      |        |    |
|                               |                 | 1994  | 3,217       | 1,898 | 5,309  | 36    | 230.86 | 136.26 | 381.04 | 3      |        |    |
|                               |                 | 1995  | 3,023       | 1,919 | 4,904  | 34    | 212.62 | 135.00 | 345.00 | 2      |        |    |
|                               |                 | 1996  | 2,960       | 1,929 | 4,489  | 33    | 204.77 | 133.47 | 310.60 | 2      |        |    |
|                               |                 | 1997  | 2,862       | 1,921 | 4,001  | 34    | 195.74 | 131.37 | 273.68 | 4      |        |    |
|                               |                 | 1998  | 2,814       | 1,919 | 3,696  | 36    | 189.46 | 129.23 | 248.86 | 5      |        |    |
|                               |                 | 1999  | 2,679       | 1,898 | 3,338  | 45    | 179.34 | 127.07 | 223.40 | 11     |        |    |
|                               |                 | 2000  | 2,804       | 1,918 | 3,507  | 41    | 185.90 | 127.18 | 232.50 | 8      |        |    |
|                               |                 | 2001  | 2,811       | 1,919 | 3,646  | 45    | 183.59 | 125.38 | 238.15 | 12     |        |    |
|                               |                 | 2002  | 2,891       | 1,904 | 3,886  | 44    | 183.51 | 120.89 | 246.68 | 14     |        |    |
|                               |                 | 2003  | 2,884       | 1,851 | 4,045  | 45    | 179.15 | 114.96 | 251.32 | 16     |        |    |
|                               |                 | 2004  | 2,804       | 1,767 | 4,013  | 47    | 170.01 | 107.14 | 243.30 | 17     |        |    |
|                               |                 | 2005  | 2,673       | 1,654 | 3,902  | 55    | 157.49 | 97.48  | 229.93 | 19     |        |    |
|                               |                 | 2006  | 2,469       | 1,507 | 3,649  | 62    | 141.99 | 86.68  | 209.88 | 26     |        |    |
|                               |                 | 2007  | 2,196       | 1,322 | 3,286  | 65    | 124.01 | 74.64  | 185.58 | 33     |        |    |
|                               |                 |       | Old (30-64) | 1992  | 6,620  | 3,646 | 11,761 | 51     | 240.77 | 132.61 | 427.71 | 14 |
|                               |                 |       |             | 1993  | 6,152  | 3,700 | 11,188 | 47     | 216.74 | 130.37 | 394.15 | 15 |
|                               |                 |       |             | 1994  | 6,381  | 3,766 | 10,532 | 51     | 216.11 | 127.55 | 356.69 | 16 |
|                               |                 |       |             | 1995  | 5,971  | 3,791 | 9,688  | 51     | 195.56 | 124.16 | 317.31 | 16 |
| 1996                          | 5,767           |       |             | 3,759 | 8,748  | 52    | 184.68 | 120.37 | 280.12 | 20     |        |    |
| 1997                          | 5,471           |       |             | 3,672 | 7,650  | 54    | 173.42 | 116.39 | 242.47 | 19     |        |    |
| 1998                          | 5,268           |       |             | 3,593 | 6,920  | 57    | 164.99 | 112.54 | 216.72 | 20     |        |    |
| 1999                          | 4,921           |       |             | 3,486 | 6,129  | 63    | 152.78 | 108.25 | 190.32 | 24     |        |    |
| 2000                          | 5,078           |       |             | 3,474 | 6,352  | 58    | 155.22 | 106.19 | 194.13 | 18     |        |    |
| 2001                          | 5,067           |       |             | 3,460 | 6,573  | 58    | 152.93 | 104.44 | 198.39 | 23     |        |    |
| 2002                          | 5,255           |       |             | 3,462 | 7,064  | 54    | 155.52 | 102.45 | 209.05 | 16     |        |    |
| 2003                          | 5,381           |       |             | 3,453 | 7,549  | 49    | 156.86 | 100.66 | 220.06 | 13     |        |    |
| 2004                          | 5,492           |       |             | 3,461 | 7,860  | 48    | 157.20 | 99.07  | 224.97 | 12     |        |    |
| 2005                          | 5,647           |       |             | 3,495 | 8,244  | 47    | 158.32 | 97.99  | 231.14 | 9      |        |    |
| 2006                          | 5,818           | 3,551 | 8,599       | 44    | 159.35 | 97.27 | 235.54 | 9      |        |        |        |    |
| 2007                          | 5,999           | 3,611 | 8,978       | 44    | 161.21 | 97.03 | 241.26 | 9      |        |        |        |    |



| Metropolitan Statistical Area    | PWID Population | Year  | Number             | Min   | Max    | Rank  | Rate   | Min    | Max    | Rank  |        |    |
|----------------------------------|-----------------|-------|--------------------|-------|--------|-------|--------|--------|--------|-------|--------|----|
| Allentown--Bethlehem--Easton, PA | Total           | 1992  | 6,095              | 5,683 | 6,713  | 68    | 154.97 | 144.51 | 170.68 | 30    |        |    |
|                                  |                 | 1993  | 5,622              | 3,145 | 6,750  | 70    | 142.32 | 79.62  | 170.87 | 33    |        |    |
|                                  |                 | 1994  | 6,792              | 6,375 | 7,207  | 63    | 171.03 | 160.54 | 181.48 | 20    |        |    |
|                                  |                 | 1995  | 6,066              | 2,935 | 7,901  | 68    | 152.29 | 73.68  | 198.34 | 26    |        |    |
|                                  |                 | 1996  | 6,175              | 2,829 | 8,140  | 66    | 154.12 | 70.62  | 203.19 | 23    |        |    |
|                                  |                 | 1997  | 6,225              | 2,723 | 8,148  | 65    | 154.51 | 67.58  | 202.23 | 20    |        |    |
|                                  |                 | 1998  | 6,252              | 2,618 | 8,016  | 65    | 154.12 | 64.55  | 197.59 | 18    |        |    |
|                                  |                 | 1999  | 7,508              | 7,038 | 7,775  | 56    | 183.49 | 172.02 | 190.01 | 10    |        |    |
|                                  |                 | 2000  | 6,287              | 2,406 | 8,039  | 65    | 152.47 | 58.34  | 194.96 | 18    |        |    |
|                                  |                 | 2001  | 7,763              | 7,193 | 8,406  | 52    | 186.05 | 172.40 | 201.47 | 8     |        |    |
|                                  |                 | 2002  | 6,527              | 2,208 | 8,704  | 64    | 154.25 | 52.19  | 205.70 | 15    |        |    |
|                                  |                 | 2003  | 6,661              | 2,115 | 9,041  | 59    | 154.66 | 49.12  | 209.93 | 15    |        |    |
|                                  |                 | 2004  | 6,753              | 2,030 | 9,397  | 57    | 153.84 | 46.25  | 214.08 | 15    |        |    |
|                                  |                 | 2005  | 6,662              | 1,947 | 9,768  | 61    | 148.84 | 43.50  | 218.22 | 16    |        |    |
|                                  |                 | 2006  | 6,538              | 1,857 | 10,141 | 65    | 143.45 | 40.74  | 222.52 | 19    |        |    |
|                                  |                 | 2007  | 6,350              | 1,759 | 10,473 | 70    | 137.51 | 38.10  | 226.81 | 21    |        |    |
|                                  |                 |       | Non-Hispanic White | 1992  | 3,321  | 3,097 | 3,657  | 67     | 92.14  | 85.92 | 101.48 | 40 |
|                                  |                 |       |                    | 1993  | 3,047  | 1,705 | 3,658  | 68     | 84.60  | 47.33 | 101.57 | 41 |
|                                  |                 |       |                    | 1994  | 3,655  | 3,431 | 3,878  | 62     | 101.49 | 95.27 | 107.70 | 36 |
|                                  |                 |       |                    | 1995  | 3,239  | 1,567 | 4,219  | 65     | 90.19  | 43.64 | 117.47 | 41 |
| 1996                             | 3,271           |       |                    | 1,499 | 4,312  | 65    | 91.16  | 41.77  | 120.18 | 43    |        |    |
| 1997                             | 3,273           |       |                    | 1,432 | 4,284  | 65    | 91.27  | 39.92  | 119.46 | 40    |        |    |
| 1998                             | 3,267           |       |                    | 1,368 | 4,189  | 64    | 91.06  | 38.14  | 116.74 | 38    |        |    |
| 1999                             | 3,907           |       |                    | 3,663 | 4,046  | 57    | 108.70 | 101.90 | 112.56 | 28    |        |    |
| 2000                             | 3,268           |       |                    | 1,250 | 4,178  | 63    | 90.77  | 34.73  | 116.07 | 42    |        |    |
| 2001                             | 4,044           |       |                    | 3,747 | 4,379  | 56    | 111.73 | 103.53 | 120.99 | 27    |        |    |
| 2002                             | 3,422           |       |                    | 1,158 | 4,563  | 63    | 93.84  | 31.75  | 125.14 | 36    |        |    |
| 2003                             | 3,531           |       |                    | 1,121 | 4,793  | 61    | 95.91  | 30.46  | 130.18 | 36    |        |    |
| 2004                             | 3,639           |       |                    | 1,094 | 5,064  | 63    | 97.81  | 29.41  | 136.11 | 35    |        |    |
| 2005                             | 3,668           |       |                    | 1,072 | 5,378  | 64    | 97.57  | 28.51  | 143.05 | 35    |        |    |
| 2006                             | 3,697           | 1,050 | 5,736              | 64    | 97.70  | 27.75 | 151.55 | 38     |        |       |        |    |
| 2007                             | 3,707           | 1,027 | 6,114              | 64    | 97.70  | 27.07 | 161.15 | 38     |        |       |        |    |

| Metropolitan Statistical Area    | PWID Population    | Year | Number   | Min   | Max    | Rank   | Rate   | Min    | Max     | Rank   |         |   |
|----------------------------------|--------------------|------|----------|-------|--------|--------|--------|--------|---------|--------|---------|---|
| Allentown--Bethlehem--Easton, PA | Non-Hispanic Black | 1992 | 776      | 724   | 855    | 84     | 948.59 | 884.54 | 1044.72 | 2      |         |   |
|                                  |                    | 1993 | 708      | 396   | 850    | 85     | 824.42 | 461.21 | 989.80  | 3      |         |   |
|                                  |                    | 1994 | 833      | 782   | 884    | 82     | 922.81 | 866.25 | 979.20  | 1      |         |   |
|                                  |                    | 1995 | 717      | 347   | 934    | 85     | 756.13 | 365.82 | 984.77  | 3      |         |   |
|                                  |                    | 1996 | 696      | 319   | 918    | 84     | 700.25 | 320.85 | 923.19  | 3      |         |   |
|                                  |                    | 1997 | 666      | 291   | 871    | 84     | 638.84 | 279.42 | 836.15  | 4      |         |   |
|                                  |                    | 1998 | 631      | 264   | 810    | 82     | 577.09 | 241.68 | 739.86  | 4      |         |   |
|                                  |                    | 1999 | 715      | 671   | 741    | 77     | 621.62 | 582.74 | 643.71  | 3      |         |   |
|                                  |                    | 2000 | 566      | 217   | 724    | 82     | 471.64 | 180.47 | 603.07  | 6      |         |   |
|                                  |                    | 2001 | 664      | 615   | 719    | 76     | 527.21 | 488.54 | 570.92  | 4      |         |   |
|                                  |                    | 2002 | 534      | 181   | 712    | 83     | 399.68 | 135.24 | 532.99  | 8      |         |   |
|                                  |                    | 2003 | 527      | 167   | 715    | 83     | 366.62 | 116.43 | 497.63  | 9      |         |   |
|                                  |                    | 2004 | 524      | 158   | 730    | 82     | 335.06 | 100.74 | 466.26  | 12     |         |   |
|                                  |                    | 2005 | 517      | 151   | 757    | 82     | 305.96 | 89.41  | 448.59  | 14     |         |   |
|                                  |                    | 2006 | 518      | 147   | 803    | 82     | 282.49 | 80.23  | 438.20  | 15     |         |   |
|                                  |                    | 2007 | 527      | 146   | 870    | 83     | 269.36 | 74.63  | 444.27  | 17     |         |   |
|                                  |                    |      | Hispanic | 1992  | 1,975  | 1,842  | 2,175  | 34     | 1034.67 | 964.80 | 1139.51 | 1 |
|                                  |                    |      |          | 1993  | 1,817  | 1,017  | 2,182  | 34     | 893.29  | 499.74 | 1072.49 | 1 |
|                                  |                    |      |          | 1994  | 2,198  | 2,063  | 2,332  | 32     | 1015.68 | 953.43 | 1077.74 | 1 |
|                                  |                    |      |          | 1995  | 1,972  | 954    | 2,568  | 32     | 854.52  | 413.42 | 1112.91 | 1 |
| 1996                             | 2,021              |      |          | 926   | 2,664  | 32     | 814.51 | 373.20 | 1073.82 | 1      |         |   |
| 1997                             | 2,053              |      |          | 898   | 2,687  | 32     | 775.23 | 339.08 | 1014.67 | 3      |         |   |
| 1998                             | 2,079              |      |          | 871   | 2,665  | 32     | 738.33 | 309.21 | 946.58  | 3      |         |   |
| 1999                             | 2,516              |      |          | 2,358 | 2,605  | 28     | 838.85 | 786.40 | 868.67  | 1      |         |   |
| 2000                             | 2,120              |      |          | 811   | 2,711  | 32     | 667.19 | 255.30 | 853.11  | 3      |         |   |
| 2001                             | 2,629              |      |          | 2,437 | 2,847  | 28     | 787.71 | 729.94 | 853.01  | 1      |         |   |
| 2002                             | 2,215              |      |          | 749   | 2,953  | 33     | 625.35 | 211.59 | 833.91  | 3      |         |   |
| 2003                             | 2,256              |      |          | 717   | 3,063  | 32     | 596.77 | 189.53 | 810.02  | 3      |         |   |
| 2004                             | 2,275              |      |          | 684   | 3,165  | 32     | 562.57 | 169.13 | 782.84  | 4      |         |   |
| 2005                             | 2,221              |      |          | 649   | 3,256  | 32     | 512.38 | 149.74 | 751.25  | 5      |         |   |
| 2006                             | 2,145              |      |          | 609   | 3,327  | 33     | 458.22 | 130.15 | 710.79  | 6      |         |   |
| 2007                             | 2,039              | 565  | 3,363    | 34    | 407.14 | 112.80 | 671.52 | 7      |         |        |         |   |

| Metropolitan Statistical Area    | PWID Population | Year   | Number | Min   | Max   | Rank   | Rate   | Min    | Max    | Rank   |    |
|----------------------------------|-----------------|--------|--------|-------|-------|--------|--------|--------|--------|--------|----|
| Allentown--Bethlehem--Easton, PA | Male            | 1992   | 4,226  | 3,941 | 4,655 | 66     | 216.94 | 202.29 | 238.92 | 27     |    |
|                                  |                 | 1993   | 3,897  | 2,180 | 4,679 | 68     | 199.01 | 111.34 | 238.94 | 32     |    |
|                                  |                 | 1994   | 4,706  | 4,417 | 4,993 | 60     | 238.94 | 224.29 | 253.54 | 19     |    |
|                                  |                 | 1995   | 4,202  | 2,033 | 5,473 | 64     | 212.59 | 102.85 | 276.87 | 24     |    |
|                                  |                 | 1996   | 4,277  | 1,959 | 5,638 | 62     | 215.10 | 98.56  | 283.58 | 18     |    |
|                                  |                 | 1997   | 4,312  | 1,886 | 5,644 | 61     | 215.57 | 94.29  | 282.15 | 17     |    |
|                                  |                 | 1998   | 4,333  | 1,815 | 5,555 | 59     | 215.11 | 90.09  | 275.78 | 14     |    |
|                                  |                 | 1999   | 5,208  | 4,882 | 5,393 | 52     | 256.13 | 240.12 | 265.24 | 8      |    |
|                                  |                 | 2000   | 4,367  | 1,671 | 5,584 | 58     | 213.04 | 81.52  | 272.41 | 13     |    |
|                                  |                 | 2001   | 5,402  | 5,006 | 5,850 | 48     | 260.32 | 241.23 | 281.90 | 8      |    |
|                                  |                 | 2002   | 4,554  | 1,541 | 6,073 | 54     | 216.08 | 73.11  | 288.15 | 13     |    |
|                                  |                 | 2003   | 4,663  | 1,481 | 6,329 | 52     | 217.14 | 68.96  | 294.74 | 12     |    |
|                                  |                 | 2004   | 4,747  | 1,427 | 6,605 | 52     | 216.64 | 65.13  | 301.46 | 12     |    |
|                                  |                 | 2005   | 4,706  | 1,375 | 6,899 | 54     | 210.46 | 61.50  | 308.57 | 12     |    |
|                                  |                 | 2006   | 4,644  | 1,319 | 7,204 | 55     | 203.83 | 57.89  | 316.18 | 14     |    |
|                                  | 2007            | 4,541  | 1,258  | 7,490 | 55    | 196.54 | 54.45  | 324.16 | 14     |        |    |
|                                  |                 | Female | 1992   | 1,915 | 1,785 | 2,109  | 68     | 96.46  | 89.95  | 106.24 | 36 |
|                                  |                 |        | 1993   | 1,759 | 984   | 2,111  | 73     | 88.27  | 49.38  | 105.98 | 34 |
|                                  |                 |        | 1994   | 2,119 | 1,989 | 2,248  | 67     | 105.87 | 99.38  | 112.33 | 28 |
|                                  |                 |        | 1995   | 1,890 | 915   | 2,462  | 74     | 94.20  | 45.58  | 122.69 | 29 |
|                                  |                 |        | 1996   | 1,924 | 881   | 2,536  | 73     | 95.32  | 43.67  | 125.66 | 28 |
|                                  |                 |        | 1997   | 1,940 | 849   | 2,539  | 75     | 95.62  | 41.83  | 125.16 | 27 |
|                                  |                 |        | 1998   | 1,949 | 816   | 2,499  | 76     | 95.43  | 39.97  | 122.34 | 24 |
|                                  |                 |        | 1999   | 2,341 | 2,194 | 2,424  | 65     | 113.71 | 106.60 | 117.75 | 15 |
|                                  |                 |        | 2000   | 1,959 | 750   | 2,505  | 75     | 94.47  | 36.15  | 120.79 | 25 |
|                                  | 2001            |        | 2,415  | 2,238 | 2,615 | 65     | 115.14 | 106.69 | 124.68 | 15     |    |
|                                  | 2002            | 2,024  | 685    | 2,699 | 74    | 95.29  | 32.24  | 127.07 | 23     |        |    |
|                                  | 2003            | 2,055  | 653    | 2,789 | 75    | 95.15  | 30.22  | 129.16 | 24     |        |    |
|                                  | 2004            | 2,068  | 622    | 2,877 | 74    | 94.05  | 28.27  | 130.87 | 23     |        |    |
|                                  | 2005            | 2,019  | 590    | 2,961 | 76    | 90.14  | 26.34  | 132.16 | 23     |        |    |
|                                  | 2006            | 1,956  | 555    | 3,033 | 78    | 85.81  | 24.37  | 133.10 | 27     |        |    |
|                                  | 2007            | 1,868  | 518    | 3,081 | 79    | 80.97  | 22.43  | 133.55 | 29     |        |    |

| Metropolitan Statistical Area    | PWID Population | Year  | Number      | Min   | Max    | Rank  | Rate   | Min    | Max    | Rank   |        |    |
|----------------------------------|-----------------|-------|-------------|-------|--------|-------|--------|--------|--------|--------|--------|----|
| Allentown--Bethlehem--Easton, PA | Young (15-29)   | 1992  | 2,071       | 1,931 | 2,281  | 53    | 168.53 | 157.15 | 185.61 | 13     |        |    |
|                                  |                 | 1993  | 1,760       | 985   | 2,113  | 56    | 145.03 | 81.14  | 174.13 | 17     |        |    |
|                                  |                 | 1994  | 2,030       | 1,906 | 2,154  | 51    | 169.13 | 158.76 | 179.46 | 12     |        |    |
|                                  |                 | 1995  | 1,788       | 865   | 2,329  | 56    | 150.52 | 72.82  | 196.03 | 13     |        |    |
|                                  |                 | 1996  | 1,844       | 845   | 2,431  | 58    | 156.07 | 71.51  | 205.75 | 12     |        |    |
|                                  |                 | 1997  | 1,924       | 842   | 2,519  | 56    | 163.49 | 71.51  | 213.99 | 9      |        |    |
|                                  |                 | 1998  | 2,031       | 850   | 2,604  | 56    | 173.05 | 72.47  | 221.86 | 8      |        |    |
|                                  |                 | 1999  | 2,585       | 2,423 | 2,676  | 48    | 221.89 | 208.02 | 229.78 | 3      |        |    |
|                                  |                 | 2000  | 2,300       | 880   | 2,941  | 49    | 198.72 | 76.04  | 254.10 | 5      |        |    |
|                                  |                 | 2001  | 3,010       | 2,789 | 3,259  | 43    | 257.63 | 238.74 | 278.99 | 4      |        |    |
|                                  |                 | 2002  | 2,662       | 901   | 3,550  | 47    | 223.85 | 75.74  | 298.51 | 5      |        |    |
|                                  |                 | 2003  | 2,824       | 897   | 3,833  | 46    | 231.22 | 73.43  | 313.85 | 5      |        |    |
|                                  |                 | 2004  | 2,931       | 881   | 4,078  | 44    | 232.49 | 69.90  | 323.52 | 6      |        |    |
|                                  |                 | 2005  | 2,903       | 848   | 4,256  | 46    | 223.60 | 65.35  | 327.84 | 8      |        |    |
|                                  |                 | 2006  | 2,793       | 793   | 4,333  | 52    | 209.52 | 59.51  | 325.01 | 11     |        |    |
|                                  |                 | 2007  | 2,584       | 716   | 4,261  | 56    | 191.37 | 53.02  | 315.63 | 13     |        |    |
|                                  |                 |       | Old (30-64) | 1992  | 4,090  | 3,814 | 4,504  | 72     | 151.23 | 141.02 | 166.56 | 40 |
|                                  |                 |       |             | 1993  | 3,896  | 2,180 | 4,678  | 75     | 142.35 | 79.64  | 170.91 | 37 |
|                                  |                 |       |             | 1994  | 4,781  | 4,488 | 5,074  | 64     | 172.57 | 161.99 | 183.12 | 26 |
|                                  |                 |       |             | 1995  | 4,285  | 2,073 | 5,581  | 67     | 153.30 | 74.17  | 199.65 | 31 |
| 1996                             | 4,333           |       |             | 1,985 | 5,713  | 66    | 153.40 | 70.29  | 202.23 | 29     |        |    |
| 1997                             | 4,303           |       |             | 1,882 | 5,633  | 66    | 150.89 | 66.00  | 197.50 | 26     |        |    |
| 1998                             | 4,227           |       |             | 1,770 | 5,420  | 68    | 146.62 | 61.41  | 187.98 | 27     |        |    |
| 1999                             | 4,938           |       |             | 4,629 | 5,113  | 62    | 168.70 | 158.15 | 174.70 | 18     |        |    |
| 2000                             | 4,007           |       |             | 1,533 | 5,124  | 69    | 135.10 | 51.69  | 172.74 | 31     |        |    |
| 2001                             | 4,789           |       |             | 4,438 | 5,186  | 62    | 159.42 | 147.73 | 172.64 | 17     |        |    |
| 2002                             | 3,906           |       |             | 1,322 | 5,209  | 68    | 128.41 | 43.45  | 171.23 | 27     |        |    |
| 2003                             | 3,889           |       |             | 1,235 | 5,279  | 67    | 126.06 | 40.03  | 171.11 | 27     |        |    |
| 2004                             | 3,885           |       |             | 1,168 | 5,406  | 68    | 124.15 | 37.32  | 172.76 | 27     |        |    |
| 2005                             | 3,826           |       |             | 1,118 | 5,610  | 67    | 120.41 | 35.19  | 176.54 | 25     |        |    |
| 2006                             | 3,812           |       |             | 1,083 | 5,913  | 67    | 118.21 | 33.58  | 183.38 | 25     |        |    |
| 2007                             | 3,827           | 1,060 | 6,311       | 64    | 117.11 | 32.44 | 193.15 | 21     |        |        |        |    |

| Metropolitan Statistical Area | PWID Population | Year | Number             | Min   | Max   | Rank  | Rate  | Min   | Max   | Rank  |       |    |
|-------------------------------|-----------------|------|--------------------|-------|-------|-------|-------|-------|-------|-------|-------|----|
| Ann Arbor, MI                 | Total           | 1992 | 1,413              | 1,235 | 1,504 | 99    | 39.48 | 34.51 | 42.04 | 99    |       |    |
|                               |                 | 1993 | 1,340              | 1,248 | 1,447 | 99    | 37.19 | 34.63 | 40.14 | 99    |       |    |
|                               |                 | 1994 | 1,294              | 1,218 | 1,396 | 100   | 35.47 | 33.39 | 38.25 | 100   |       |    |
|                               |                 | 1995 | 1,285              | 1,091 | 1,398 | 100   | 34.57 | 29.35 | 37.61 | 100   |       |    |
|                               |                 | 1996 | 1,267              | 978   | 1,443 | 100   | 33.39 | 25.78 | 38.03 | 100   |       |    |
|                               |                 | 1997 | 1,254              | 897   | 1,480 | 100   | 32.44 | 23.21 | 38.28 | 100   |       |    |
|                               |                 | 1998 | 1,247              | 847   | 1,514 | 100   | 31.74 | 21.55 | 38.54 | 100   |       |    |
|                               |                 | 1999 | 1,208              | 988   | 1,430 | 100   | 30.06 | 24.58 | 35.59 | 100   |       |    |
|                               |                 | 2000 | 1,366              | 1,174 | 1,550 | 100   | 33.24 | 28.58 | 37.74 | 99    |       |    |
|                               |                 | 2001 | 1,336              | 1,141 | 1,532 | 100   | 31.89 | 27.22 | 36.55 | 100   |       |    |
|                               |                 | 2002 | 1,489              | 1,108 | 1,634 | 100   | 34.86 | 25.93 | 38.26 | 99    |       |    |
|                               |                 | 2003 | 1,542              | 1,069 | 1,770 | 100   | 35.63 | 24.70 | 40.89 | 99    |       |    |
|                               |                 | 2004 | 1,565              | 1,034 | 1,789 | 100   | 35.62 | 23.53 | 40.72 | 100   |       |    |
|                               |                 | 2005 | 1,577              | 998   | 1,937 | 100   | 35.41 | 22.41 | 43.50 | 100   |       |    |
|                               |                 | 2006 | 1,571              | 959   | 2,080 | 100   | 34.96 | 21.34 | 46.29 | 100   |       |    |
|                               |                 | 2007 | 1,554              | 914   | 2,238 | 100   | 34.47 | 20.28 | 49.63 | 100   |       |    |
|                               |                 |      | Non-Hispanic White | 1992  | 908   | 794   | 967   | 99    | 29.21 | 25.54 | 31.11 | 98 |
|                               |                 |      |                    | 1993  | 846   | 788   | 913   | 99    | 27.11 | 25.24 | 29.26 | 98 |
|                               |                 |      |                    | 1994  | 811   | 763   | 875   | 99    | 25.76 | 24.25 | 27.79 | 99 |
|                               |                 |      |                    | 1995  | 807   | 686   | 878   | 99    | 25.29 | 21.47 | 27.51 | 99 |
| 1996                          | 804             |      |                    | 621   | 916   | 99    | 24.77 | 19.13 | 28.21 | 99    |       |    |
| 1997                          | 808             |      |                    | 578   | 953   | 100   | 24.52 | 17.55 | 28.94 | 100   |       |    |
| 1998                          | 818             |      |                    | 555   | 993   | 100   | 24.49 | 16.62 | 29.73 | 100   |       |    |
| 1999                          | 806             |      |                    | 659   | 955   | 100   | 23.71 | 19.39 | 28.08 | 100   |       |    |
| 2000                          | 927             |      |                    | 797   | 1,053 | 99    | 26.77 | 23.01 | 30.39 | 96    |       |    |
| 2001                          | 920             |      |                    | 785   | 1,055 | 99    | 26.08 | 22.27 | 29.90 | 97    |       |    |
| 2002                          | 1,035           |      |                    | 770   | 1,136 | 99    | 28.87 | 21.48 | 31.69 | 96    |       |    |
| 2003                          | 1,077           |      |                    | 747   | 1,236 | 99    | 29.69 | 20.58 | 34.07 | 96    |       |    |
| 2004                          | 1,090           |      |                    | 720   | 1,246 | 99    | 29.64 | 19.58 | 33.89 | 96    |       |    |
| 2005                          | 1,086           |      |                    | 687   | 1,334 | 99    | 29.21 | 18.49 | 35.89 | 99    |       |    |
| 2006                          | 1,058           | 646  | 1,401              | 99    | 28.28 | 17.27 | 37.45 | 100   |       |       |       |    |
| 2007                          | 1,010           | 594  | 1,455              | 99    | 26.96 | 15.86 | 38.83 | 100   |       |       |       |    |

| Metropolitan Statistical Area | PWID Population    | Year | Number   | Min  | Max   | Rank | Rate   | Min    | Max    | Rank  |       |     |
|-------------------------------|--------------------|------|----------|------|-------|------|--------|--------|--------|-------|-------|-----|
| Ann Arbor, MI                 | Non-Hispanic Black | 1992 | 447      | 391  | 476   | 92   | 178.61 | 156.15 | 190.20 | 82    |       |     |
|                               |                    | 1993 | 430      | 400  | 464   | 93   | 167.74 | 156.19 | 181.05 | 79    |       |     |
|                               |                    | 1994 | 411      | 386  | 443   | 93   | 155.82 | 146.68 | 168.07 | 83    |       |     |
|                               |                    | 1995 | 396      | 336  | 431   | 94   | 145.49 | 123.52 | 158.28 | 80    |       |     |
|                               |                    | 1996 | 374      | 288  | 425   | 94   | 133.39 | 102.98 | 151.91 | 81    |       |     |
|                               |                    | 1997 | 349      | 250  | 412   | 94   | 120.52 | 86.24  | 142.23 | 81    |       |     |
|                               |                    | 1998 | 326      | 221  | 396   | 94   | 109.59 | 74.39  | 133.04 | 86    |       |     |
|                               |                    | 1999 | 295      | 241  | 349   | 94   | 96.10  | 78.59  | 113.79 | 88    |       |     |
|                               |                    | 2000 | 312      | 268  | 354   | 93   | 98.72  | 84.88  | 112.08 | 85    |       |     |
|                               |                    | 2001 | 287      | 245  | 329   | 94   | 90.00  | 76.84  | 103.17 | 86    |       |     |
|                               |                    | 2002 | 304      | 226  | 334   | 93   | 93.78  | 69.76  | 102.93 | 83    |       |     |
|                               |                    | 2003 | 306      | 212  | 351   | 93   | 93.54  | 64.85  | 107.34 | 80    |       |     |
|                               |                    | 2004 | 308      | 203  | 352   | 93   | 92.91  | 61.39  | 106.22 | 75    |       |     |
|                               |                    | 2005 | 317      | 201  | 389   | 93   | 93.85  | 59.41  | 115.31 | 74    |       |     |
|                               |                    | 2006 | 334      | 204  | 442   | 92   | 97.21  | 59.35  | 128.71 | 74    |       |     |
|                               |                    | 2007 | 362      | 213  | 522   | 92   | 105.37 | 61.99  | 151.74 | 71    |       |     |
|                               |                    |      | Hispanic | 1992 | 16    | 14   | 17     | 99     | 18.23  | 15.94 | 19.42 | 100 |
|                               |                    |      |          | 1993 | 17    | 16   | 18     | 97     | 18.76  | 17.47 | 20.25 | 97  |
|                               |                    |      |          | 1994 | 18    | 17   | 19     | 98     | 18.78  | 17.68 | 20.25 | 98  |
|                               |                    |      |          | 1995 | 18    | 15   | 20     | 97     | 18.56  | 15.75 | 20.19 | 95  |
| 1996                          | 18                 |      |          | 14   | 21    | 98   | 17.57  | 13.56  | 20.01  | 95    |       |     |
| 1997                          | 18                 |      |          | 13   | 21    | 98   | 16.49  | 11.80  | 19.46  | 94    |       |     |
| 1998                          | 17                 |      |          | 12   | 21    | 99   | 15.40  | 10.45  | 18.69  | 96    |       |     |
| 1999                          | 16                 |      |          | 13   | 19    | 99   | 13.72  | 11.22  | 16.25  | 98    |       |     |
| 2000                          | 18                 |      |          | 15   | 20    | 97   | 14.18  | 12.19  | 16.09  | 95    |       |     |
| 2001                          | 16                 |      |          | 14   | 19    | 98   | 12.64  | 10.79  | 14.49  | 98    |       |     |
| 2002                          | 17                 |      |          | 13   | 19    | 97   | 12.98  | 9.65   | 14.24  | 96    |       |     |
| 2003                          | 18                 |      |          | 12   | 20    | 97   | 12.64  | 8.77   | 14.51  | 99    |       |     |
| 2004                          | 17                 |      |          | 12   | 20    | 97   | 12.28  | 8.11   | 14.04  | 100   |       |     |
| 2005                          | 18                 |      |          | 11   | 22    | 97   | 12.17  | 7.71   | 14.96  | 100   |       |     |
| 2006                          | 18                 |      |          | 11   | 24    | 99   | 12.19  | 7.44   | 16.15  | 99    |       |     |
| 2007                          | 19                 | 11   | 27       | 99   | 12.54 | 7.38 | 18.06  | 98     |        |       |       |     |

| Metropolitan Statistical Area | PWID Population | Year   | Number | Min   | Max   | Rank  | Rate  | Min   | Max   | Rank  |    |
|-------------------------------|-----------------|--------|--------|-------|-------|-------|-------|-------|-------|-------|----|
| Ann Arbor, MI                 | Male            | 1992   | 849    | 742   | 904   | 99    | 47.09 | 41.16 | 50.14 | 99    |    |
|                               |                 | 1993   | 820    | 764   | 885   | 99    | 45.13 | 42.02 | 48.70 | 99    |    |
|                               |                 | 1994   | 800    | 753   | 863   | 100   | 43.45 | 40.90 | 46.87 | 100   |    |
|                               |                 | 1995   | 799    | 678   | 869   | 100   | 42.53 | 36.11 | 46.27 | 100   |    |
|                               |                 | 1996   | 788    | 609   | 898   | 100   | 41.10 | 31.73 | 46.81 | 100   |    |
|                               |                 | 1997   | 779    | 557   | 919   | 100   | 39.84 | 28.51 | 47.02 | 100   |    |
|                               |                 | 1998   | 772    | 524   | 937   | 100   | 38.86 | 26.38 | 47.18 | 100   |    |
|                               |                 | 1999   | 745    | 609   | 882   | 100   | 36.63 | 29.95 | 43.37 | 100   |    |
|                               |                 | 2000   | 839    | 722   | 953   | 100   | 40.37 | 34.71 | 45.83 | 100   |    |
|                               |                 | 2001   | 821    | 701   | 941   | 100   | 38.73 | 33.06 | 44.39 | 100   |    |
|                               |                 | 2002   | 917    | 682   | 1,006 | 100   | 42.38 | 31.52 | 46.51 | 100   |    |
|                               |                 | 2003   | 957    | 663   | 1,098 | 100   | 43.63 | 30.25 | 50.07 | 100   |    |
|                               |                 | 2004   | 984    | 650   | 1,125 | 100   | 44.16 | 29.18 | 50.49 | 100   |    |
|                               |                 | 2005   | 1,011  | 640   | 1,243 | 100   | 44.71 | 28.30 | 54.93 | 100   |    |
|                               |                 | 2006   | 1,035  | 632   | 1,371 | 100   | 45.33 | 27.67 | 60.02 | 99    |    |
|                               | 2007            | 1,060  | 623    | 1,526 | 100   | 46.31 | 27.25 | 66.69 | 99    |       |    |
|                               |                 | Female | 1992   | 581   | 508   | 619   | 97    | 32.73 | 28.62 | 34.86 | 92 |
|                               |                 |        | 1993   | 547   | 509   | 591   | 98    | 30.62 | 28.51 | 33.05 | 94 |
|                               |                 |        | 1994   | 527   | 496   | 568   | 99    | 29.17 | 27.46 | 31.46 | 98 |
|                               |                 |        | 1995   | 524   | 445   | 570   | 99    | 28.53 | 24.22 | 31.03 | 95 |
|                               |                 |        | 1996   | 520   | 401   | 592   | 99    | 27.70 | 21.38 | 31.54 | 97 |
|                               |                 |        | 1997   | 517   | 370   | 611   | 99    | 27.08 | 19.38 | 31.96 | 98 |
|                               |                 |        | 1998   | 518   | 351   | 628   | 100   | 26.65 | 18.09 | 32.35 | 98 |
|                               |                 |        | 1999   | 503   | 412   | 596   | 100   | 25.36 | 20.74 | 30.02 | 99 |
|                               |                 |        | 2000   | 570   | 490   | 647   | 100   | 28.08 | 24.14 | 31.88 | 98 |
|                               | 2001            |        | 555    | 474   | 637   | 100   | 26.83 | 22.90 | 30.75 | 99    |    |
|                               | 2002            | 613    | 456    | 673   | 100   | 29.09 | 21.64 | 31.93 | 98    |       |    |
|                               | 2003            | 624    | 433    | 716   | 100   | 29.22 | 20.26 | 33.54 | 98    |       |    |
|                               | 2004            | 616    | 407    | 704   | 100   | 28.45 | 18.80 | 32.53 | 98    |       |    |
|                               | 2005            | 597    | 378    | 734   | 100   | 27.26 | 17.26 | 33.49 | 100   |       |    |
|                               | 2006            | 564    | 345    | 747   | 100   | 25.54 | 15.59 | 33.82 | 100   |       |    |
|                               | 2007            | 521    | 306    | 750   | 100   | 23.45 | 13.80 | 33.77 | 100   |       |    |

| Metropolitan Statistical Area | PWID Population | Year | Number      | Min  | Max   | Rank  | Rate  | Min   | Max   | Rank  |       |     |
|-------------------------------|-----------------|------|-------------|------|-------|-------|-------|-------|-------|-------|-------|-----|
| Ann Arbor, MI                 | Young (15-29)   | 1992 | 438         | 383  | 467   | 99    | 32.06 | 28.03 | 34.14 | 97    |       |     |
|                               |                 | 1993 | 396         | 369  | 428   | 99    | 29.41 | 27.39 | 31.74 | 97    |       |     |
|                               |                 | 1994 | 376         | 354  | 406   | 99    | 28.14 | 26.49 | 30.35 | 98    |       |     |
|                               |                 | 1995 | 378         | 321  | 411   | 97    | 28.12 | 23.88 | 30.59 | 97    |       |     |
|                               |                 | 1996 | 385         | 297  | 439   | 97    | 28.35 | 21.88 | 32.28 | 97    |       |     |
|                               |                 | 1997 | 401         | 287  | 474   | 97    | 29.27 | 20.95 | 34.54 | 96    |       |     |
|                               |                 | 1998 | 425         | 288  | 516   | 96    | 30.90 | 20.97 | 37.51 | 96    |       |     |
|                               |                 | 1999 | 441         | 361  | 522   | 100   | 31.72 | 25.94 | 37.55 | 98    |       |     |
|                               |                 | 2000 | 535         | 460  | 607   | 97    | 38.13 | 32.78 | 43.28 | 93    |       |     |
|                               |                 | 2001 | 560         | 478  | 642   | 99    | 39.24 | 33.50 | 44.99 | 98    |       |     |
|                               |                 | 2002 | 663         | 493  | 727   | 97    | 45.68 | 33.98 | 50.14 | 91    |       |     |
|                               |                 | 2003 | 722         | 500  | 828   | 98    | 49.07 | 34.02 | 56.31 | 89    |       |     |
|                               |                 | 2004 | 760         | 502  | 869   | 99    | 50.80 | 33.56 | 58.07 | 93    |       |     |
|                               |                 | 2005 | 784         | 496  | 963   | 99    | 51.59 | 32.66 | 63.39 | 95    |       |     |
|                               |                 | 2006 | 785         | 479  | 1,039 | 100   | 51.02 | 31.15 | 67.56 | 96    |       |     |
|                               |                 | 2007 | 765         | 450  | 1,101 | 100   | 49.54 | 29.15 | 71.34 | 96    |       |     |
|                               |                 |      | Old (30-64) | 1992 | 1,005 | 879   | 1,070 | 99    | 45.46 | 39.74 | 48.41 | 98  |
|                               |                 |      |             | 1993 | 973   | 906   | 1,050 | 99    | 43.11 | 40.15 | 46.53 | 97  |
|                               |                 |      |             | 1994 | 947   | 891   | 1,021 | 100   | 40.98 | 38.58 | 44.20 | 100 |
|                               |                 |      |             | 1995 | 939   | 797   | 1,022 | 100   | 39.59 | 33.62 | 43.07 | 99  |
| 1996                          | 918             |      |             | 709  | 1,045 | 100   | 37.70 | 29.10 | 42.93 | 99    |       |     |
| 1997                          | 893             |      |             | 639  | 1,054 | 100   | 35.81 | 25.62 | 42.26 | 99    |       |     |
| 1998                          | 867             |      |             | 589  | 1,053 | 100   | 33.95 | 23.05 | 41.22 | 99    |       |     |
| 1999                          | 813             |      |             | 665  | 963   | 100   | 30.96 | 25.31 | 36.65 | 100   |       |     |
| 2000                          | 885             |      |             | 761  | 1,005 | 100   | 32.72 | 28.13 | 37.14 | 98    |       |     |
| 2001                          | 828             |      |             | 707  | 949   | 99    | 29.97 | 25.59 | 34.35 | 99    |       |     |
| 2002                          | 879             |      |             | 654  | 964   | 99    | 31.15 | 23.17 | 34.19 | 98    |       |     |
| 2003                          | 864             |      |             | 599  | 991   | 99    | 30.22 | 20.95 | 34.68 | 99    |       |     |
| 2004                          | 831             |      |             | 549  | 950   | 99    | 28.69 | 18.95 | 32.80 | 99    |       |     |
| 2005                          | 796             |      |             | 504  | 978   | 99    | 27.12 | 17.17 | 33.32 | 99    |       |     |
| 2006                          | 757             |      |             | 462  | 1,003 | 100   | 25.63 | 15.65 | 33.94 | 100   |       |     |
| 2007                          | 723             | 425  | 1,041       | 100  | 24.37 | 14.34 | 35.09 | 100   |       |       |       |     |



| Metropolitan Statistical Area | PWID Population | Year  | Number             | Min    | Max    | Rank  | Rate   | Min   | Max    | Rank  |       |    |
|-------------------------------|-----------------|-------|--------------------|--------|--------|-------|--------|-------|--------|-------|-------|----|
| Atlanta, GA                   | Total           | 1992  | 21,482             | 16,827 | 24,457 | 22    | 97.27  | 76.19 | 110.74 | 56    |       |    |
|                               |                 | 1993  | 19,846             | 16,300 | 24,447 | 20    | 87.00  | 71.46 | 107.17 | 59    |       |    |
|                               |                 | 1994  | 20,499             | 15,836 | 24,421 | 19    | 86.55  | 66.86 | 103.11 | 65    |       |    |
|                               |                 | 1995  | 18,901             | 15,275 | 24,234 | 21    | 77.04  | 62.26 | 98.78  | 69    |       |    |
|                               |                 | 1996  | 18,320             | 14,637 | 23,910 | 21    | 72.20  | 57.68 | 94.23  | 71    |       |    |
|                               |                 | 1997  | 17,433             | 13,934 | 22,450 | 22    | 66.44  | 53.11 | 85.56  | 76    |       |    |
|                               |                 | 1998  | 16,502             | 13,462 | 20,604 | 24    | 60.81  | 49.61 | 75.93  | 78    |       |    |
|                               |                 | 1999  | 16,139             | 12,929 | 18,822 | 26    | 57.56  | 46.11 | 67.13  | 84    |       |    |
|                               |                 | 2000  | 15,019             | 12,981 | 17,772 | 27    | 51.79  | 44.76 | 61.28  | 88    |       |    |
|                               |                 | 2001  | 15,287             | 13,023 | 17,711 | 27    | 50.96  | 43.41 | 59.04  | 94    |       |    |
|                               |                 | 2002  | 15,209             | 13,778 | 18,559 | 26    | 49.39  | 44.74 | 60.26  | 93    |       |    |
|                               |                 | 2003  | 15,930             | 13,502 | 19,737 | 23    | 50.48  | 42.78 | 62.54  | 93    |       |    |
|                               |                 | 2004  | 16,859             | 12,786 | 20,916 | 20    | 51.96  | 39.41 | 64.47  | 94    |       |    |
|                               |                 | 2005  | 17,958             | 12,111 | 22,345 | 19    | 53.82  | 36.30 | 66.97  | 91    |       |    |
|                               |                 | 2006  | 19,287             | 11,516 | 23,879 | 18    | 55.93  | 33.40 | 69.25  | 85    |       |    |
|                               |                 | 2007  | 20,564             | 10,807 | 25,232 | 17    | 58.07  | 30.52 | 71.25  | 81    |       |    |
|                               |                 |       | Non-Hispanic White | 1992   | 9,041  | 7,082 | 10,293 | 25    | 58.53  | 45.85 | 66.64 | 66 |
|                               |                 |       |                    | 1993   | 8,184  | 6,722 | 10,082 | 25    | 52.03  | 42.74 | 64.09 | 64 |
|                               |                 |       |                    | 1994   | 8,366  | 6,463 | 9,967  | 25    | 52.01  | 40.18 | 61.96 | 72 |
|                               |                 |       |                    | 1995   | 7,700  | 6,223 | 9,873  | 25    | 47.02  | 38.00 | 60.29 | 72 |
| 1996                          | 7,506           |       |                    | 5,997  | 9,797  | 25    | 45.15  | 36.07 | 58.92  | 75    |       |    |
| 1997                          | 7,227           |       |                    | 5,776  | 9,307  | 26    | 42.89  | 34.28 | 55.23  | 77    |       |    |
| 1998                          | 6,954           |       |                    | 5,673  | 8,683  | 27    | 40.66  | 33.17 | 50.76  | 79    |       |    |
| 1999                          | 6,938           |       |                    | 5,558  | 8,091  | 28    | 40.11  | 32.13 | 46.78  | 81    |       |    |
| 2000                          | 6,600           |       |                    | 5,705  | 7,810  | 29    | 37.60  | 32.50 | 44.50  | 84    |       |    |
| 2001                          | 6,874           |       |                    | 5,856  | 7,964  | 31    | 38.42  | 32.73 | 44.51  | 88    |       |    |
| 2002                          | 6,997           |       |                    | 6,339  | 8,539  | 27    | 38.62  | 34.99 | 47.13  | 84    |       |    |
| 2003                          | 7,489           |       |                    | 6,348  | 9,279  | 26    | 40.86  | 34.63 | 50.63  | 85    |       |    |
| 2004                          | 8,083           |       |                    | 6,130  | 10,028 | 25    | 43.54  | 33.02 | 54.01  | 85    |       |    |
| 2005                          | 8,753           |       |                    | 5,903  | 10,891 | 22    | 46.55  | 31.40 | 57.93  | 81    |       |    |
| 2006                          | 9,520           | 5,684 | 11,787             | 22     | 50.01  | 29.86 | 61.91  | 79    |        |       |       |    |
| 2007                          | 10,234          | 5,378 | 12,557             | 21     | 53.24  | 27.98 | 65.33  | 77    |        |       |       |    |

| Metropolitan Statistical Area | PWID Population    | Year | Number   | Min   | Max    | Rank  | Rate   | Min    | Max    | Rank  |       |    |
|-------------------------------|--------------------|------|----------|-------|--------|-------|--------|--------|--------|-------|-------|----|
| Atlanta, GA                   | Non-Hispanic Black | 1992 | 8,662    | 6,785 | 9,862  | 12    | 156.16 | 122.32 | 177.78 | 87    |       |    |
|                               |                    | 1993 | 8,745    | 7,183 | 10,772 | 12    | 149.95 | 123.16 | 184.72 | 85    |       |    |
|                               |                    | 1994 | 9,507    | 7,345 | 11,326 | 11    | 154.08 | 119.03 | 183.56 | 84    |       |    |
|                               |                    | 1995 | 8,969    | 7,248 | 11,500 | 11    | 138.07 | 111.58 | 177.03 | 84    |       |    |
|                               |                    | 1996 | 8,702    | 6,953 | 11,357 | 11    | 127.26 | 101.68 | 166.10 | 82    |       |    |
|                               |                    | 1997 | 8,149    | 6,513 | 10,494 | 11    | 113.43 | 90.66  | 146.08 | 86    |       |    |
|                               |                    | 1998 | 7,494    | 6,113 | 9,356  | 11    | 99.27  | 80.98  | 123.95 | 87    |       |    |
|                               |                    | 1999 | 7,058    | 5,654 | 8,231  | 12    | 89.12  | 71.39  | 103.93 | 89    |       |    |
|                               |                    | 2000 | 6,299    | 5,444 | 7,453  | 14    | 76.12  | 65.79  | 90.07  | 92    |       |    |
|                               |                    | 2001 | 6,156    | 5,244 | 7,132  | 14    | 70.89  | 60.39  | 82.13  | 92    |       |    |
|                               |                    | 2002 | 5,922    | 5,365 | 7,227  | 14    | 65.51  | 59.35  | 79.95  | 92    |       |    |
|                               |                    | 2003 | 6,079    | 5,153 | 7,532  | 14    | 64.74  | 54.88  | 80.22  | 92    |       |    |
|                               |                    | 2004 | 6,431    | 4,877 | 7,979  | 14    | 65.47  | 49.66  | 81.23  | 89    |       |    |
|                               |                    | 2005 | 7,020    | 4,734 | 8,735  | 14    | 68.33  | 46.08  | 85.03  | 89    |       |    |
|                               |                    | 2006 | 7,949    | 4,746 | 9,841  | 12    | 73.11  | 43.65  | 90.52  | 85    |       |    |
|                               |                    | 2007 | 9,193    | 4,831 | 11,280 | 11    | 80.98  | 42.56  | 99.36  | 81    |       |    |
|                               |                    |      | Hispanic | 1992  | 228    | 178   | 259    | 65     | 39.64  | 31.05 | 45.13 | 91 |
|                               |                    |      |          | 1993  | 209    | 172   | 257    | 65     | 31.27  | 25.68 | 38.52 | 93 |
|                               |                    |      |          | 1994  | 219    | 169   | 261    | 67     | 28.14  | 21.74 | 33.52 | 94 |
|                               |                    |      |          | 1995  | 208    | 168   | 267    | 65     | 22.39  | 18.09 | 28.71 | 94 |
| 1996                          | 211                |      |          | 169   | 276    | 64    | 19.19  | 15.33  | 25.04  | 94    |       |    |
| 1997                          | 214                |      |          | 171   | 275    | 64    | 16.26  | 13.00  | 20.94  | 95    |       |    |
| 1998                          | 217                |      |          | 177   | 272    | 65    | 14.41  | 11.76  | 18.00  | 97    |       |    |
| 1999                          | 231                |      |          | 185   | 269    | 65    | 13.19  | 10.57  | 15.39  | 99    |       |    |
| 2000                          | 235                |      |          | 203   | 278    | 65    | 11.72  | 10.13  | 13.87  | 99    |       |    |
| 2001                          | 262                |      |          | 223   | 304    | 65    | 12.11  | 10.31  | 14.03  | 99    |       |    |
| 2002                          | 288                |      |          | 261   | 351    | 64    | 12.46  | 11.28  | 15.20  | 99    |       |    |
| 2003                          | 333                |      |          | 283   | 413    | 63    | 13.64  | 11.56  | 16.90  | 96    |       |    |
| 2004                          | 391                |      |          | 296   | 484    | 61    | 15.07  | 11.43  | 18.70  | 96    |       |    |
| 2005                          | 460                |      |          | 310   | 573    | 60    | 16.75  | 11.29  | 20.84  | 96    |       |    |
| 2006                          | 547                |      |          | 326   | 677    | 58    | 18.60  | 11.11  | 23.03  | 94    |       |    |
| 2007                          | 644                | 338  | 790      | 58    | 20.60  | 10.82 | 25.27  | 93     |        |       |       |    |

| Metropolitan Statistical Area | PWID Population | Year   | Number | Min    | Max    | Rank  | Rate   | Min    | Max    | Rank  |    |
|-------------------------------|-----------------|--------|--------|--------|--------|-------|--------|--------|--------|-------|----|
| Atlanta, GA                   | Male            | 1992   | 14,919 | 11,686 | 16,985 | 18    | 137.34 | 107.58 | 156.36 | 53    |    |
|                               |                 | 1993   | 13,689 | 11,243 | 16,863 | 19    | 121.80 | 100.04 | 150.03 | 55    |    |
|                               |                 | 1994   | 14,022 | 10,833 | 16,705 | 18    | 119.98 | 92.69  | 142.94 | 59    |    |
|                               |                 | 1995   | 12,808 | 10,351 | 16,422 | 19    | 105.67 | 85.40  | 135.48 | 65    |    |
|                               |                 | 1996   | 12,292 | 9,821  | 16,042 | 20    | 97.94  | 78.25  | 127.82 | 67    |    |
|                               |                 | 1997   | 11,579 | 9,255  | 14,912 | 22    | 89.06  | 71.19  | 114.69 | 76    |    |
|                               |                 | 1998   | 10,856 | 8,856  | 13,554 | 23    | 80.62  | 65.77  | 100.66 | 77    |    |
|                               |                 | 1999   | 10,525 | 8,432  | 12,275 | 24    | 75.51  | 60.49  | 88.06  | 84    |    |
|                               |                 | 2000   | 9,726  | 8,406  | 11,509 | 25    | 67.28  | 58.15  | 79.61  | 86    |    |
|                               |                 | 2001   | 9,852  | 8,392  | 11,414 | 27    | 65.84  | 56.09  | 76.28  | 92    |    |
|                               |                 | 2002   | 9,781  | 8,861  | 11,936 | 24    | 63.75  | 57.75  | 77.79  | 88    |    |
|                               |                 | 2003   | 10,259 | 8,695  | 12,711 | 23    | 65.33  | 55.38  | 80.95  | 89    |    |
|                               |                 | 2004   | 10,915 | 8,278  | 13,542 | 19    | 67.47  | 51.17  | 83.71  | 87    |    |
|                               |                 | 2005   | 11,739 | 7,916  | 14,607 | 18    | 70.79  | 47.74  | 88.09  | 81    |    |
|                               |                 | 2006   | 12,788 | 7,635  | 15,833 | 18    | 74.56  | 44.52  | 92.31  | 76    |    |
|                               | 2007            | 13,896 | 7,303  | 17,050 | 16     | 79.04 | 41.54  | 96.98  | 74     |       |    |
|                               |                 | Female | 1992   | 6,280  | 4,920  | 7,150 | 25     | 55.96  | 43.84  | 63.71 | 66 |
|                               |                 |        | 1993   | 6,142  | 5,045  | 7,566 | 24     | 53.08  | 43.59  | 65.38 | 68 |
|                               |                 |        | 1994   | 6,652  | 5,139  | 7,925 | 21     | 55.44  | 42.83  | 66.05 | 72 |
|                               |                 |        | 1995   | 6,376  | 5,153  | 8,175 | 22     | 51.37  | 41.52  | 65.87 | 71 |
|                               |                 |        | 1996   | 6,375  | 5,093  | 8,320 | 22     | 49.71  | 39.71  | 64.87 | 74 |
|                               |                 |        | 1997   | 6,212  | 4,965  | 7,999 | 22     | 46.93  | 37.51  | 60.43 | 78 |
|                               |                 |        | 1998   | 5,981  | 4,879  | 7,468 | 22     | 43.75  | 35.69  | 54.62 | 79 |
|                               |                 |        | 1999   | 5,913  | 4,737  | 6,896 | 22     | 41.94  | 33.60  | 48.92 | 89 |
|                               |                 |        | 2000   | 5,531  | 4,781  | 6,545 | 25     | 38.03  | 32.87  | 45.00 | 89 |
|                               | 2001            |        | 5,628  | 4,795  | 6,521  | 24    | 37.44  | 31.89  | 43.37  | 89    |    |
|                               | 2002            | 5,569  | 5,046  | 6,796  | 25     | 36.04 | 32.65  | 43.98  | 92     |       |    |
|                               | 2003            | 5,774  | 4,894  | 7,154  | 23     | 36.41 | 30.87  | 45.12  | 92     |       |    |
|                               | 2004            | 6,021  | 4,566  | 7,470  | 23     | 37.01 | 28.07  | 45.92  | 92     |       |    |
|                               | 2005            | 6,292  | 4,243  | 7,829  | 23     | 37.48 | 25.28  | 46.64  | 92     |       |    |
|                               | 2006            | 6,601  | 3,942  | 8,173  | 21     | 38.09 | 22.74  | 47.16  | 91     |       |    |
|                               | 2007            | 6,849  | 3,600  | 8,404  | 21     | 38.41 | 20.19  | 47.13  | 88     |       |    |

| Metropolitan Statistical Area | PWID Population | Year  | Number      | Min    | Max    | Rank   | Rate   | Min   | Max    | Rank  |        |    |
|-------------------------------|-----------------|-------|-------------|--------|--------|--------|--------|-------|--------|-------|--------|----|
| Atlanta, GA                   | Young (15-29)   | 1992  | 5,833       | 4,569  | 6,641  | 19     | 77.34  | 60.58 | 88.05  | 57    |        |    |
|                               |                 | 1993  | 4,848       | 3,982  | 5,972  | 22     | 63.39  | 52.07 | 78.09  | 61    |        |    |
|                               |                 | 1994  | 4,636       | 3,581  | 5,523  | 22     | 59.53  | 45.99 | 70.92  | 68    |        |    |
|                               |                 | 1995  | 4,068       | 3,287  | 5,216  | 24     | 51.12  | 41.31 | 65.54  | 71    |        |    |
|                               |                 | 1996  | 3,850       | 3,076  | 5,024  | 25     | 47.15  | 37.67 | 61.54  | 78    |        |    |
|                               |                 | 1997  | 3,659       | 2,925  | 4,712  | 28     | 43.51  | 34.77 | 56.02  | 82    |        |    |
|                               |                 | 1998  | 3,528       | 2,878  | 4,405  | 31     | 40.65  | 33.16 | 50.75  | 86    |        |    |
|                               |                 | 1999  | 3,571       | 2,860  | 4,164  | 31     | 39.94  | 32.00 | 46.58  | 92    |        |    |
|                               |                 | 2000  | 3,481       | 3,009  | 4,120  | 33     | 37.83  | 32.70 | 44.76  | 94    |        |    |
|                               |                 | 2001  | 3,745       | 3,190  | 4,338  | 32     | 40.27  | 34.30 | 46.65  | 97    |        |    |
|                               |                 | 2002  | 3,956       | 3,584  | 4,828  | 32     | 42.31  | 38.33 | 51.63  | 96    |        |    |
|                               |                 | 2003  | 4,407       | 3,735  | 5,460  | 28     | 46.72  | 39.60 | 57.88  | 95    |        |    |
|                               |                 | 2004  | 4,951       | 3,755  | 6,143  | 23     | 51.32  | 38.92 | 63.68  | 92    |        |    |
|                               |                 | 2005  | 5,571       | 3,757  | 6,932  | 19     | 56.95  | 38.41 | 70.86  | 89    |        |    |
|                               |                 | 2006  | 6,272       | 3,745  | 7,766  | 17     | 61.90  | 36.96 | 76.63  | 86    |        |    |
|                               |                 | 2007  | 6,941       | 3,648  | 8,516  | 16     | 66.99  | 35.21 | 82.20  | 80    |        |    |
|                               |                 |       | Old (30-64) | 1992   | 15,725 | 12,317 | 17,903 | 20    | 108.12 | 84.69 | 123.10 | 56 |
|                               |                 |       |             | 1993   | 15,238 | 12,516 | 18,771 | 19    | 100.49 | 82.54 | 123.79 | 57 |
|                               |                 |       |             | 1994   | 16,196 | 12,512 | 19,295 | 17    | 101.88 | 78.70 | 121.37 | 60 |
|                               |                 |       |             | 1995   | 15,168 | 12,258 | 19,448 | 18    | 91.51  | 73.95 | 117.32 | 64 |
| 1996                          | 14,791          |       |             | 11,817 | 19,304 | 19     | 85.94  | 68.66 | 112.16 | 67    |        |    |
| 1997                          | 14,053          |       |             | 11,232 | 18,097 | 20     | 78.83  | 63.00 | 101.51 | 71    |        |    |
| 1998                          | 13,199          |       |             | 10,767 | 16,480 | 22     | 71.51  | 58.34 | 89.29  | 73    |        |    |
| 1999                          | 12,740          |       |             | 10,206 | 14,858 | 23     | 66.71  | 53.44 | 77.80  | 79    |        |    |
| 2000                          | 11,650          |       |             | 10,069 | 13,785 | 25     | 58.84  | 50.86 | 69.63  | 82    |        |    |
| 2001                          | 11,616          |       |             | 9,895  | 13,457 | 25     | 56.12  | 47.81 | 65.02  | 88    |        |    |
| 2002                          | 11,303          |       |             | 10,240 | 13,793 | 24     | 52.71  | 47.75 | 64.32  | 86    |        |    |
| 2003                          | 11,590          |       |             | 9,824  | 14,360 | 21     | 52.38  | 44.40 | 64.90  | 84    |        |    |
| 2004                          | 12,049          |       |             | 9,138  | 14,948 | 21     | 52.85  | 40.08 | 65.57  | 80    |        |    |
| 2005                          | 12,687          |       |             | 8,556  | 15,786 | 21     | 53.80  | 36.28 | 66.94  | 77    |        |    |
| 2006                          | 13,591          | 8,115 | 16,827      | 19     | 55.82  | 33.33  | 69.11  | 74    |        |       |        |    |
| 2007                          | 14,611          | 7,679 | 17,928      | 18     | 58.33  | 30.65  | 71.57  | 67    |        |       |        |    |

| Metropolitan Statistical Area | PWID Population | Year  | Number             | Min    | Max    | Rank  | Rate   | Min    | Max    | Rank   |        |    |
|-------------------------------|-----------------|-------|--------------------|--------|--------|-------|--------|--------|--------|--------|--------|----|
| Austin--San Marcos, TX        | Total           | 1992  | 15,264             | 13,758 | 16,376 | 33    | 238.41 | 214.89 | 255.77 | 9      |        |    |
|                               |                 | 1993  | 13,957             | 7,920  | 18,086 | 31    | 209.35 | 118.80 | 271.29 | 11     |        |    |
|                               |                 | 1994  | 16,680             | 13,141 | 20,537 | 26    | 239.87 | 188.98 | 295.35 | 5      |        |    |
|                               |                 | 1995  | 14,699             | 7,332  | 22,199 | 29    | 201.88 | 100.70 | 304.89 | 8      |        |    |
|                               |                 | 1996  | 14,440             | 6,988  | 21,953 | 29    | 190.66 | 92.27  | 289.85 | 8      |        |    |
|                               |                 | 1997  | 13,689             | 6,625  | 19,846 | 30    | 174.17 | 84.29  | 252.51 | 11     |        |    |
|                               |                 | 1998  | 12,937             | 6,380  | 17,387 | 31    | 157.92 | 77.88  | 212.24 | 17     |        |    |
|                               |                 | 1999  | 14,234             | 11,605 | 16,182 | 32    | 165.89 | 135.26 | 188.60 | 15     |        |    |
|                               |                 | 2000  | 11,845             | 6,395  | 16,692 | 34    | 131.05 | 70.75  | 184.68 | 31     |        |    |
|                               |                 | 2001  | 13,166             | 11,187 | 17,088 | 33    | 139.26 | 118.32 | 180.75 | 22     |        |    |
|                               |                 | 2002  | 10,986             | 6,078  | 17,367 | 39    | 113.80 | 62.96  | 179.90 | 36     |        |    |
|                               |                 | 2003  | 10,569             | 5,595  | 17,632 | 40    | 107.33 | 56.82  | 179.05 | 39     |        |    |
|                               |                 | 2004  | 10,118             | 5,060  | 17,973 | 40    | 100.36 | 50.19  | 178.27 | 44     |        |    |
|                               |                 | 2005  | 9,716              | 4,552  | 18,435 | 43    | 93.54  | 43.82  | 177.49 | 48     |        |    |
|                               |                 | 2006  | 9,470              | 4,037  | 19,146 | 42    | 87.74  | 37.40  | 177.38 | 55     |        |    |
|                               |                 | 2007  | 9,233              | 3,483  | 19,904 | 46    | 82.23  | 31.02  | 177.27 | 59     |        |    |
|                               |                 |       | Non-Hispanic White | 1992   | 7,509  | 6,768 | 8,056  | 29     | 173.42 | 156.31 | 186.06 | 13 |
|                               |                 |       |                    | 1993   | 6,731  | 3,820 | 8,722  | 29     | 150.70 | 85.52  | 195.29 | 16 |
|                               |                 |       |                    | 1994   | 7,994  | 6,297 | 9,842  | 26     | 173.07 | 136.35 | 213.10 | 12 |
|                               |                 |       |                    | 1995   | 7,077  | 3,530 | 10,688 | 26     | 147.87 | 73.76  | 223.32 | 15 |
| 1996                          | 7,044           |       |                    | 3,409  | 10,708 | 27    | 142.89 | 69.15  | 217.23 | 15     |        |    |
| 1997                          | 6,802           |       |                    | 3,292  | 9,862  | 29    | 134.28 | 64.99  | 194.68 | 15     |        |    |
| 1998                          | 6,569           |       |                    | 3,240  | 8,829  | 31    | 125.55 | 61.92  | 168.74 | 19     |        |    |
| 1999                          | 7,391           |       |                    | 6,026  | 8,402  | 25    | 136.15 | 111.01 | 154.79 | 15     |        |    |
| 2000                          | 6,279           |       |                    | 3,390  | 8,849  | 32    | 111.06 | 59.96  | 156.50 | 23     |        |    |
| 2001                          | 7,101           |       |                    | 6,033  | 9,216  | 28    | 120.99 | 102.80 | 157.04 | 21     |        |    |
| 2002                          | 5,997           |       |                    | 3,318  | 9,480  | 34    | 101.13 | 55.95  | 159.88 | 31     |        |    |
| 2003                          | 5,799           |       |                    | 3,070  | 9,674  | 36    | 96.67  | 51.17  | 161.27 | 34     |        |    |
| 2004                          | 5,532           |       |                    | 2,766  | 9,826  | 39    | 90.70  | 45.36  | 161.10 | 37     |        |    |
| 2005                          | 5,237           |       |                    | 2,453  | 9,937  | 41    | 84.00  | 39.35  | 159.37 | 44     |        |    |
| 2006                          | 4,969           |       |                    | 2,118  | 10,046 | 42    | 77.33  | 32.96  | 156.34 | 48     |        |    |
| 2007                          | 4,644           | 1,752 | 10,011             | 54     | 70.01  | 26.41 | 150.92 | 60     |        |        |        |    |

| Metropolitan Statistical Area | PWID Population    | Year | Number   | Min   | Max   | Rank  | Rate   | Min    | Max    | Rank   |        |    |
|-------------------------------|--------------------|------|----------|-------|-------|-------|--------|--------|--------|--------|--------|----|
| Austin--San Marcos, TX        | Non-Hispanic Black | 1992 | 3,507    | 3,161 | 3,762 | 28    | 657.84 | 592.94 | 705.77 | 7      |        |    |
|                               |                    | 1993 | 3,023    | 1,715 | 3,917 | 31    | 552.16 | 313.34 | 715.53 | 9      |        |    |
|                               |                    | 1994 | 3,376    | 2,660 | 4,157 | 28    | 596.77 | 470.15 | 734.79 | 6      |        |    |
|                               |                    | 1995 | 2,762    | 1,378 | 4,171 | 33    | 469.51 | 234.20 | 709.08 | 12     |        |    |
|                               |                    | 1996 | 2,509    | 1,214 | 3,815 | 35    | 415.95 | 201.29 | 632.33 | 12     |        |    |
|                               |                    | 1997 | 2,199    | 1,064 | 3,188 | 39    | 355.63 | 172.11 | 515.59 | 14     |        |    |
|                               |                    | 1998 | 1,927    | 950   | 2,590 | 44    | 302.62 | 149.25 | 406.72 | 19     |        |    |
|                               |                    | 1999 | 1,979    | 1,614 | 2,250 | 43    | 300.32 | 244.86 | 341.44 | 19     |        |    |
|                               |                    | 2000 | 1,554    | 839   | 2,190 | 54    | 226.04 | 122.04 | 318.54 | 33     |        |    |
|                               |                    | 2001 | 1,653    | 1,405 | 2,146 | 52    | 233.34 | 198.27 | 302.87 | 25     |        |    |
|                               |                    | 2002 | 1,345    | 744   | 2,127 | 58    | 186.16 | 102.99 | 294.30 | 39     |        |    |
|                               |                    | 2003 | 1,290    | 683   | 2,152 | 59    | 175.99 | 93.17  | 293.61 | 40     |        |    |
|                               |                    | 2004 | 1,263    | 632   | 2,244 | 60    | 168.96 | 84.50  | 300.12 | 43     |        |    |
|                               |                    | 2005 | 1,278    | 599   | 2,425 | 60    | 166.28 | 77.90  | 315.51 | 42     |        |    |
|                               |                    | 2006 | 1,357    | 578   | 2,743 | 57    | 167.57 | 71.43  | 338.77 | 45     |        |    |
|                               |                    | 2007 | 1,491    | 562   | 3,214 | 54    | 177.97 | 67.14  | 383.66 | 44     |        |    |
|                               |                    |      | Hispanic | 1992  | 3,506 | 3,160 | 3,761  | 23     | 262.94 | 237.00 | 282.10 | 22 |
|                               |                    |      |          | 1993  | 3,392 | 1,925 | 4,396  | 21     | 238.05 | 135.09 | 308.48 | 25 |
|                               |                    |      |          | 1994  | 4,185 | 3,297 | 5,153  | 18     | 275.13 | 216.75 | 338.76 | 16 |
|                               |                    |      |          | 1995  | 3,728 | 1,860 | 5,631  | 19     | 228.25 | 113.86 | 344.72 | 21 |
| 1996                          | 3,642              |      |          | 1,763 | 5,537 | 19    | 208.82 | 101.05 | 317.45 | 20     |        |    |
| 1997                          | 3,389              |      |          | 1,640 | 4,913 | 23    | 182.74 | 88.44  | 264.93 | 25     |        |    |
| 1998                          | 3,114              |      |          | 1,536 | 4,185 | 24    | 157.51 | 77.68  | 211.69 | 31     |        |    |
| 1999                          | 3,312              |      |          | 2,701 | 3,766 | 20    | 156.64 | 127.72 | 178.09 | 24     |        |    |
| 2000                          | 2,660              |      |          | 1,436 | 3,748 | 25    | 116.35 | 62.82  | 163.96 | 36     |        |    |
| 2001                          | 2,858              |      |          | 2,428 | 3,709 | 26    | 117.65 | 99.96  | 152.70 | 36     |        |    |
| 2002                          | 2,320              |      |          | 1,283 | 3,667 | 29    | 91.59  | 50.67  | 144.79 | 45     |        |    |
| 2003                          | 2,193              |      |          | 1,161 | 3,659 | 33    | 83.50  | 44.20  | 139.30 | 46     |        |    |
| 2004                          | 2,095              |      |          | 1,048 | 3,722 | 34    | 76.86  | 38.44  | 136.52 | 48     |        |    |
| 2005                          | 2,047              |      |          | 959   | 3,885 | 35    | 71.83  | 33.65  | 136.29 | 54     |        |    |
| 2006                          | 2,080              |      |          | 887   | 4,206 | 34    | 69.44  | 29.60  | 140.39 | 55     |        |    |
| 2007                          | 2,174              | 820  | 4,686    | 33    | 68.77 | 25.94 | 148.25 | 56     |        |        |        |    |

| Metropolitan Statistical Area | PWID Population | Year   | Number | Min    | Max    | Rank   | Rate   | Min    | Max    | Rank   |    |
|-------------------------------|-----------------|--------|--------|--------|--------|--------|--------|--------|--------|--------|----|
| Austin--San Marcos, TX        | Male            | 1992   | 10,840 | 9,771  | 11,630 | 29     | 333.18 | 300.31 | 357.45 | 6      |    |
|                               |                 | 1993   | 9,839  | 5,583  | 12,750 | 29     | 290.12 | 164.64 | 375.96 | 8      |    |
|                               |                 | 1994   | 11,630 | 9,162  | 14,320 | 25     | 327.83 | 258.28 | 403.65 | 2      |    |
|                               |                 | 1995   | 10,108 | 5,042  | 15,266 | 28     | 271.87 | 135.61 | 410.59 | 8      |    |
|                               |                 | 1996   | 9,773  | 4,730  | 14,857 | 28     | 252.25 | 122.07 | 383.48 | 9      |    |
|                               |                 | 1997   | 9,107  | 4,407  | 13,203 | 31     | 226.03 | 109.39 | 327.70 | 11     |    |
|                               |                 | 1998   | 8,459  | 4,172  | 11,368 | 31     | 201.01 | 99.14  | 270.15 | 19     |    |
|                               |                 | 1999   | 9,155  | 7,465  | 10,409 | 32     | 207.25 | 168.98 | 235.63 | 18     |    |
|                               |                 | 2000   | 7,512  | 4,056  | 10,586 | 35     | 161.14 | 87.00  | 227.08 | 35     |    |
|                               |                 | 2001   | 8,262  | 7,020  | 10,724 | 33     | 169.28 | 143.83 | 219.71 | 33     |    |
|                               |                 | 2002   | 6,857  | 3,793  | 10,840 | 39     | 137.35 | 75.98  | 217.13 | 41     |    |
|                               |                 | 2003   | 6,602  | 3,495  | 11,015 | 40     | 129.55 | 68.58  | 216.13 | 41     |    |
|                               |                 | 2004   | 6,374  | 3,188  | 11,322 | 40     | 122.05 | 61.04  | 216.81 | 44     |    |
|                               |                 | 2005   | 6,224  | 2,916  | 11,809 | 40     | 115.48 | 54.10  | 219.11 | 52     |    |
|                               | 2006            | 6,222  | 2,652  | 12,580 | 39     | 111.08 | 47.35  | 224.58 | 54     |        |    |
|                               | 2007            | 6,275  | 2,367  | 13,528 | 42     | 107.66 | 40.61  | 232.09 | 55     |        |    |
|                               |                 | Female | 1992   | 4,476  | 4,034  | 4,802  | 36     | 142.13 | 128.11 | 152.49 | 15 |
|                               |                 |        | 1993   | 4,155  | 2,358  | 5,384  | 34     | 126.84 | 71.98  | 164.37 | 17 |
|                               |                 |        | 1994   | 5,090  | 4,010  | 6,268  | 29     | 149.45 | 117.74 | 184.02 | 11 |
|                               |                 |        | 1995   | 4,631  | 2,310  | 6,995  | 31     | 129.99 | 64.84  | 196.31 | 14 |
|                               |                 |        | 1996   | 4,718  | 2,283  | 7,173  | 31     | 127.54 | 61.72  | 193.89 | 13 |
|                               |                 |        | 1997   | 4,647  | 2,249  | 6,737  | 32     | 121.31 | 58.71  | 175.87 | 13 |
|                               |                 |        | 1998   | 4,560  | 2,249  | 6,128  | 33     | 114.45 | 56.44  | 153.81 | 15 |
|                               |                 |        | 1999   | 5,194  | 4,235  | 5,905  | 31     | 124.79 | 101.74 | 141.87 | 12 |
|                               |                 |        | 2000   | 4,454  | 2,405  | 6,277  | 34     | 101.76 | 54.94  | 143.41 | 19 |
|                               |                 |        | 2001   | 5,067  | 4,305  | 6,576  | 31     | 110.79 | 94.14  | 143.80 | 17 |
|                               | 2002            |        | 4,290  | 2,373  | 6,782  | 35     | 92.03  | 50.91  | 145.49 | 27     |    |
|                               | 2003            |        | 4,144  | 2,194  | 6,914  | 36     | 87.23  | 46.18  | 145.52 | 29     |    |
|                               | 2004            | 3,935  | 1,968  | 6,989  | 41     | 80.97  | 40.49  | 143.82 | 33     |        |    |
|                               | 2005            | 3,692  | 1,729  | 7,004  | 42     | 73.88  | 34.61  | 140.18 | 41     |        |    |
|                               | 2006            | 3,454  | 1,472  | 6,984  | 41     | 66.53  | 28.36  | 134.50 | 47     |        |    |
|                               | 2007            | 3,165  | 1,194  | 6,824  | 48     | 58.62  | 22.11  | 126.38 | 55     |        |    |

| Metropolitan Statistical Area | PWID Population | Year  | Number      | Min   | Max    | Rank  | Rate   | Min    | Max    | Rank   |        |    |
|-------------------------------|-----------------|-------|-------------|-------|--------|-------|--------|--------|--------|--------|--------|----|
| Austin--San Marcos, TX        | Young (15-29)   | 1992  | 5,056       | 4,557 | 5,424  | 23    | 198.66 | 179.06 | 213.13 | 9      |        |    |
|                               |                 | 1993  | 4,671       | 2,651 | 6,054  | 24    | 180.21 | 102.27 | 233.53 | 9      |        |    |
|                               |                 | 1994  | 5,602       | 4,414 | 6,898  | 18    | 210.30 | 165.68 | 258.93 | 5      |        |    |
|                               |                 | 1995  | 4,926       | 2,457 | 7,439  | 20    | 178.39 | 88.98  | 269.41 | 7      |        |    |
|                               |                 | 1996  | 4,806       | 2,326 | 7,307  | 20    | 168.17 | 81.38  | 255.65 | 8      |        |    |
|                               |                 | 1997  | 4,511       | 2,183 | 6,540  | 22    | 152.09 | 73.60  | 220.49 | 13     |        |    |
|                               |                 | 1998  | 4,214       | 2,078 | 5,663  | 23    | 136.23 | 67.19  | 183.09 | 20     |        |    |
|                               |                 | 1999  | 4,580       | 3,734 | 5,207  | 21    | 141.37 | 115.26 | 160.72 | 18     |        |    |
|                               |                 | 2000  | 3,768       | 2,034 | 5,310  | 29    | 110.86 | 59.85  | 156.22 | 37     |        |    |
|                               |                 | 2001  | 4,151       | 3,527 | 5,388  | 29    | 118.45 | 100.64 | 153.74 | 36     |        |    |
|                               |                 | 2002  | 3,446       | 1,907 | 5,448  | 34    | 97.70  | 54.05  | 154.46 | 51     |        |    |
|                               |                 | 2003  | 3,317       | 1,756 | 5,533  | 37    | 93.65  | 49.58  | 156.24 | 54     |        |    |
|                               |                 | 2004  | 3,198       | 1,599 | 5,680  | 40    | 89.57  | 44.80  | 159.11 | 56     |        |    |
|                               |                 | 2005  | 3,118       | 1,461 | 5,916  | 42    | 85.99  | 40.28  | 163.15 | 58     |        |    |
|                               |                 | 2006  | 3,115       | 1,328 | 6,297  | 44    | 83.76  | 35.70  | 169.34 | 62     |        |    |
|                               |                 | 2007  | 3,144       | 1,186 | 6,779  | 44    | 82.30  | 31.05  | 177.43 | 58     |        |    |
|                               |                 |       | Old (30-64) | 1992  | 10,251 | 9,240 | 10,998 | 35     | 265.72 | 239.50 | 285.08 | 9  |
|                               |                 |       |             | 1993  | 9,265  | 5,258 | 12,006 | 35     | 227.39 | 129.04 | 294.67 | 12 |
|                               |                 |       |             | 1994  | 11,019 | 8,681 | 13,567 | 32     | 256.87 | 202.37 | 316.28 | 6  |
|                               |                 |       |             | 1995  | 9,718  | 4,847 | 14,676 | 31     | 215.01 | 107.25 | 324.72 | 9  |
| 1996                          | 9,597           |       |             | 4,644 | 14,590 | 31    | 203.51 | 98.49  | 309.38 | 11     |        |    |
| 1997                          | 9,173           |       |             | 4,439 | 13,299 | 32    | 187.47 | 90.73  | 271.78 | 15     |        |    |
| 1998                          | 8,756           |       |             | 4,318 | 11,768 | 33    | 171.71 | 84.69  | 230.78 | 18     |        |    |
| 1999                          | 9,733           |       |             | 7,936 | 11,066 | 33    | 182.26 | 148.60 | 207.21 | 12     |        |    |
| 2000                          | 8,178           |       |             | 4,415 | 11,524 | 35    | 145.01 | 78.29  | 204.35 | 24     |        |    |
| 2001                          | 9,161           |       |             | 7,784 | 11,890 | 34    | 153.97 | 130.83 | 199.85 | 21     |        |    |
| 2002                          | 7,684           |       |             | 4,251 | 12,148 | 37    | 125.42 | 69.39  | 198.28 | 29     |        |    |
| 2003                          | 7,405           |       |             | 3,920 | 12,354 | 37    | 117.43 | 62.16  | 195.91 | 29     |        |    |
| 2004                          | 7,071           |       |             | 3,537 | 12,561 | 37    | 108.59 | 54.31  | 192.89 | 32     |        |    |
| 2005                          | 6,735           |       |             | 3,155 | 12,780 | 38    | 99.62  | 46.67  | 189.03 | 40     |        |    |
| 2006                          | 6,466           |       |             | 2,756 | 13,071 | 37    | 91.38  | 38.95  | 184.74 | 42     |        |    |
| 2007                          | 6,149           | 2,320 | 13,256      | 39    | 83.01  | 31.31 | 178.94 | 46     |        |        |        |    |



| Metropolitan Statistical Area | PWID Population | Year  | Number             | Min   | Max    | Rank  | Rate   | Min    | Max    | Rank   |        |   |
|-------------------------------|-----------------|-------|--------------------|-------|--------|-------|--------|--------|--------|--------|--------|---|
| Bakersfield, CA               | Total           | 1992  | 11,714             | 9,434 | 16,192 | 40    | 317.40 | 255.62 | 438.73 | 2      |        |   |
|                               |                 | 1993  | 10,954             | 9,111 | 16,164 | 39    | 293.71 | 244.29 | 433.38 | 2      |        |   |
|                               |                 | 1994  | 11,593             | 8,848 | 16,419 | 40    | 303.54 | 231.65 | 429.89 | 1      |        |   |
|                               |                 | 1995  | 10,741             | 8,400 | 16,394 | 40    | 279.36 | 218.49 | 426.40 | 2      |        |   |
|                               |                 | 1996  | 10,611             | 7,978 | 16,595 | 40    | 273.26 | 205.46 | 427.36 | 2      |        |   |
|                               |                 | 1997  | 10,597             | 7,631 | 16,985 | 38    | 267.23 | 192.43 | 428.32 | 2      |        |   |
|                               |                 | 1998  | 10,799             | 7,275 | 18,231 | 38    | 266.28 | 179.39 | 449.56 | 2      |        |   |
|                               |                 | 1999  | 12,101             | 6,938 | 19,636 | 34    | 290.14 | 166.36 | 470.80 | 1      |        |   |
|                               |                 | 2000  | 11,213             | 6,544 | 21,127 | 36    | 264.41 | 154.30 | 498.18 | 3      |        |   |
|                               |                 | 2001  | 12,937             | 6,168 | 22,790 | 34    | 298.35 | 142.25 | 525.56 | 2      |        |   |
|                               |                 | 2002  | 11,689             | 5,868 | 24,219 | 36    | 261.98 | 131.53 | 542.83 | 3      |        |   |
|                               |                 | 2003  | 11,953             | 5,561 | 25,782 | 36    | 259.68 | 120.80 | 560.10 | 3      |        |   |
|                               |                 | 2004  | 12,196             | 5,243 | 27,235 | 35    | 256.71 | 110.36 | 573.23 | 3      |        |   |
|                               |                 | 2005  | 12,489             | 4,917 | 28,856 | 33    | 253.78 | 99.91  | 586.35 | 3      |        |   |
|                               |                 | 2006  | 12,782             | 4,576 | 30,543 | 33    | 251.14 | 89.91  | 600.13 | 4      |        |   |
|                               |                 | 2007  | 12,966             | 4,168 | 32,021 | 34    | 248.58 | 79.91  | 613.91 | 4      |        |   |
|                               |                 |       | Non-Hispanic White | 1992  | 6,844  | 5,512 | 9,461  | 34     | 303.94 | 244.78 | 420.13 | 1 |
|                               |                 |       |                    | 1993  | 5,922  | 4,926 | 8,738  | 36     | 266.10 | 221.33 | 392.65 | 3 |
|                               |                 |       |                    | 1994  | 5,949  | 4,540 | 8,426  | 39     | 268.18 | 204.67 | 379.82 | 1 |
|                               |                 |       |                    | 1995  | 5,365  | 4,196 | 8,189  | 36     | 245.12 | 191.71 | 374.14 | 3 |
| 1996                          | 5,273           |       |                    | 3,965 | 8,247  | 36    | 243.43 | 183.03 | 380.70 | 3      |        |   |
| 1997                          | 5,329           |       |                    | 3,837 | 8,541  | 35    | 245.51 | 176.79 | 393.50 | 2      |        |   |
| 1998                          | 5,558           |       |                    | 3,745 | 9,384  | 35    | 255.55 | 172.16 | 431.44 | 1      |        |   |
| 1999                          | 6,413           |       |                    | 3,677 | 10,406 | 32    | 292.73 | 167.84 | 475.00 | 1      |        |   |
| 2000                          | 6,123           |       |                    | 3,573 | 11,536 | 34    | 279.69 | 163.23 | 526.98 | 1      |        |   |
| 2001                          | 7,254           |       |                    | 3,458 | 12,777 | 27    | 329.23 | 156.98 | 579.96 | 1      |        |   |
| 2002                          | 6,680           |       |                    | 3,354 | 13,841 | 29    | 300.33 | 150.78 | 622.30 | 1      |        |   |
| 2003                          | 6,888           |       |                    | 3,204 | 14,857 | 27    | 306.49 | 142.58 | 661.06 | 1      |        |   |
| 2004                          | 6,987           |       |                    | 3,004 | 15,602 | 28    | 307.68 | 132.27 | 687.04 | 1      |        |   |
| 2005                          | 6,983           |       |                    | 2,749 | 16,134 | 29    | 305.81 | 120.40 | 706.57 | 1      |        |   |
| 2006                          | 6,812           |       |                    | 2,439 | 16,277 | 31    | 297.50 | 106.51 | 710.90 | 1      |        |   |
| 2007                          | 6,383           | 2,052 | 15,765             | 35    | 279.26 | 89.77 | 689.68 | 2      |        |        |        |   |

| Metropolitan Statistical Area | PWID Population    | Year  | Number   | Min   | Max    | Rank  | Rate   | Min    | Max    | Rank   |        |    |
|-------------------------------|--------------------|-------|----------|-------|--------|-------|--------|--------|--------|--------|--------|----|
| Bakersfield, CA               | Non-Hispanic Black | 1992  | 1,200    | 966   | 1,659  | 71    | 585.86 | 471.84 | 809.83 | 11     |        |    |
|                               |                    | 1993  | 994      | 827   | 1,466  | 72    | 475.31 | 395.34 | 701.35 | 14     |        |    |
|                               |                    | 1994  | 952      | 726   | 1,348  | 77    | 427.86 | 326.53 | 605.97 | 18     |        |    |
|                               |                    | 1995  | 814      | 637   | 1,242  | 80    | 359.58 | 281.23 | 548.85 | 23     |        |    |
|                               |                    | 1996  | 756      | 568   | 1,182  | 79    | 328.67 | 247.12 | 514.01 | 23     |        |    |
|                               |                    | 1997  | 721      | 520   | 1,156  | 79    | 305.02 | 219.64 | 488.89 | 23     |        |    |
|                               |                    | 1998  | 713      | 480   | 1,204  | 78    | 291.32 | 196.26 | 491.82 | 21     |        |    |
|                               |                    | 1999  | 784      | 450   | 1,273  | 73    | 306.75 | 175.88 | 497.74 | 18     |        |    |
|                               |                    | 2000  | 721      | 421   | 1,359  | 73    | 278.79 | 162.70 | 525.28 | 18     |        |    |
|                               |                    | 2001  | 833      | 397   | 1,467  | 68    | 312.61 | 149.05 | 550.68 | 15     |        |    |
|                               |                    | 2002  | 757      | 380   | 1,569  | 71    | 273.75 | 137.44 | 567.21 | 15     |        |    |
|                               |                    | 2003  | 782      | 364   | 1,687  | 71    | 275.36 | 128.10 | 593.91 | 16     |        |    |
|                               |                    | 2004  | 808      | 347   | 1,805  | 69    | 277.69 | 119.38 | 620.09 | 15     |        |    |
|                               |                    | 2005  | 838      | 330   | 1,937  | 69    | 278.84 | 109.78 | 644.23 | 15     |        |    |
|                               |                    | 2006  | 869      | 311   | 2,077  | 70    | 274.03 | 98.10  | 654.83 | 16     |        |    |
|                               |                    | 2007  | 893      | 287   | 2,206  | 69    | 273.17 | 87.81  | 674.64 | 16     |        |    |
|                               |                    |       | Hispanic | 1992  | 3,248  | 2,616 | 4,490  | 25     | 301.67 | 242.96 | 416.99 | 16 |
|                               |                    |       |          | 1993  | 3,246  | 2,700 | 4,789  | 24     | 287.10 | 238.80 | 423.64 | 17 |
|                               |                    |       |          | 1994  | 3,473  | 2,651 | 4,919  | 24     | 287.91 | 219.72 | 407.76 | 15 |
|                               |                    |       |          | 1995  | 3,114  | 2,435 | 4,753  | 26     | 248.79 | 194.58 | 379.74 | 18 |
| 1996                          | 2,876              |       |          | 2,162 | 4,498  | 26    | 220.72 | 165.96 | 345.19 | 19     |        |    |
| 1997                          | 2,618              |       |          | 1,885 | 4,196  | 28    | 191.41 | 137.83 | 306.80 | 21     |        |    |
| 1998                          | 2,393              |       |          | 1,612 | 4,041  | 28    | 166.34 | 112.06 | 280.82 | 25     |        |    |
| 1999                          | 2,395              |       |          | 1,373 | 3,886  | 29    | 157.60 | 90.36  | 255.73 | 23     |        |    |
| 2000                          | 1,997              |       |          | 1,165 | 3,762  | 34    | 126.29 | 73.70  | 237.95 | 34     |        |    |
| 2001                          | 2,118              |       |          | 1,010 | 3,731  | 34    | 128.56 | 61.30  | 226.46 | 31     |        |    |
| 2002                          | 1,823              |       |          | 915   | 3,777  | 36    | 105.14 | 52.79  | 217.85 | 39     |        |    |
| 2003                          | 1,866              |       |          | 868   | 4,025  | 35    | 101.69 | 47.31  | 219.34 | 41     |        |    |
| 2004                          | 2,031              |       |          | 873   | 4,535  | 35    | 104.44 | 44.90  | 233.22 | 37     |        |    |
| 2005                          | 2,387              |       |          | 940   | 5,515  | 29    | 114.72 | 45.17  | 265.06 | 33     |        |    |
| 2006                          | 3,034              | 1,086 | 7,251    | 24    | 136.97 | 49.04 | 327.31 | 23     |        |        |        |    |
| 2007                          | 4,111              | 1,322 | 10,153   | 16    | 176.52 | 56.74 | 435.94 | 20     |        |        |        |    |

| Metropolitan Statistical Area | PWID Population | Year  | Number | Min    | Max    | Rank   | Rate   | Min    | Max    | Rank |
|-------------------------------|-----------------|-------|--------|--------|--------|--------|--------|--------|--------|------|
| Bakersfield, CA               | Male            | 1992  | 6,796  | 5,473  | 9,394  | 42     | 354.78 | 285.73 | 490.41 | 3    |
|                               |                 | 1993  | 6,151  | 5,116  | 9,076  | 42     | 317.85 | 264.38 | 469.01 | 5    |
|                               |                 | 1994  | 6,367  | 4,859  | 9,018  | 43     | 319.36 | 243.73 | 452.31 | 3    |
|                               |                 | 1995  | 5,828  | 4,558  | 8,895  | 43     | 290.36 | 227.09 | 443.19 | 5    |
|                               |                 | 1996  | 5,739  | 4,315  | 8,975  | 43     | 283.15 | 212.89 | 442.82 | 5    |
|                               |                 | 1997  | 5,757  | 4,145  | 9,227  | 43     | 277.87 | 200.09 | 445.37 | 7    |
|                               |                 | 1998  | 5,928  | 3,994  | 10,008 | 42     | 279.20 | 188.10 | 471.37 | 7    |
|                               |                 | 1999  | 6,742  | 3,866  | 10,940 | 39     | 307.61 | 176.37 | 499.14 | 4    |
|                               |                 | 2000  | 6,358  | 3,711  | 11,980 | 39     | 285.47 | 166.60 | 537.87 | 6    |
|                               |                 | 2001  | 7,475  | 3,564  | 13,167 | 35     | 327.74 | 156.26 | 577.32 | 4    |
|                               |                 | 2002  | 6,879  | 3,454  | 14,254 | 38     | 292.95 | 147.08 | 607.01 | 6    |
|                               |                 | 2003  | 7,155  | 3,328  | 15,432 | 38     | 295.49 | 137.46 | 637.33 | 5    |
|                               |                 | 2004  | 7,404  | 3,183  | 16,534 | 38     | 296.42 | 127.43 | 661.92 | 5    |
|                               |                 | 2005  | 7,660  | 3,016  | 17,699 | 38     | 295.77 | 116.44 | 683.36 | 5    |
|                               | 2006            | 7,882 | 2,822  | 18,834 | 37     | 292.74 | 104.80 | 699.53 | 6      |      |
|                               | 2007            | 7,990 | 2,568  | 19,732 | 36     | 288.84 | 92.85  | 713.32 | 7      |      |
|                               | Female          | 1992  | 4,984  | 4,014  | 6,889  | 32     | 280.75 | 226.11 | 388.08 | 1    |
|                               |                 | 1993  | 4,859  | 4,042  | 7,170  | 29     | 270.79 | 225.23 | 399.56 | 1    |
|                               |                 | 1994  | 5,283  | 4,032  | 7,482  | 28     | 289.36 | 220.83 | 409.82 | 1    |
|                               |                 | 1995  | 4,966  | 3,884  | 7,580  | 27     | 270.25 | 211.36 | 412.49 | 1    |
|                               |                 | 1996  | 4,928  | 3,705  | 7,706  | 27     | 265.46 | 199.59 | 415.15 | 1    |
|                               |                 | 1997  | 4,900  | 3,529  | 7,854  | 28     | 258.78 | 186.34 | 414.76 | 1    |
|                               |                 | 1998  | 4,938  | 3,327  | 8,337  | 28     | 255.58 | 172.18 | 431.49 | 1    |
|                               |                 | 1999  | 5,442  | 3,120  | 8,830  | 27     | 275.00 | 157.68 | 446.23 | 1    |
|                               |                 | 2000  | 4,939  | 2,882  | 9,305  | 28     | 245.28 | 143.14 | 462.13 | 1    |
|                               |                 | 2001  | 5,566  | 2,654  | 9,805  | 26     | 270.79 | 129.11 | 477.00 | 1    |
| 2002                          |                 | 4,907 | 2,464  | 10,168 | 28     | 232.21 | 116.58 | 481.14 | 3      |      |
| 2003                          |                 | 4,901 | 2,280  | 10,570 | 29     | 224.64 | 104.50 | 484.51 | 3      |      |
| 2004                          |                 | 4,896 | 2,105  | 10,932 | 29     | 217.27 | 93.41  | 485.17 | 3      |      |
| 2005                          |                 | 4,930 | 1,941  | 11,391 | 29     | 211.49 | 83.26  | 488.63 | 3      |      |
| 2006                          | 4,995           | 1,788 | 11,936 | 29     | 208.38 | 74.60  | 497.95 | 3      |        |      |
| 2007                          | 5,059           | 1,626 | 12,493 | 28     | 206.51 | 66.38  | 510.00 | 3      |        |      |

| Metropolitan Statistical Area | PWID Population | Year  | Number | Min    | Max    | Rank   | Rate   | Min    | Max    | Rank |
|-------------------------------|-----------------|-------|--------|--------|--------|--------|--------|--------|--------|------|
| Bakersfield, CA               | Young (15-29)   | 1992  | 3,927  | 3,163  | 5,429  | 33     | 296.62 | 238.89 | 410.01 | 2    |
|                               |                 | 1993  | 3,265  | 2,716  | 4,818  | 32     | 248.19 | 206.44 | 366.22 | 1    |
|                               |                 | 1994  | 3,143  | 2,399  | 4,452  | 37     | 236.01 | 180.12 | 334.26 | 2    |
|                               |                 | 1995  | 2,712  | 2,121  | 4,140  | 38     | 203.82 | 159.41 | 311.10 | 4    |
|                               |                 | 1996  | 2,554  | 1,920  | 3,994  | 39     | 190.58 | 143.29 | 298.05 | 5    |
|                               |                 | 1997  | 2,483  | 1,788  | 3,979  | 43     | 181.25 | 130.51 | 290.50 | 7    |
|                               |                 | 1998  | 2,511  | 1,691  | 4,239  | 42     | 178.71 | 120.40 | 301.71 | 7    |
|                               |                 | 1999  | 2,839  | 1,628  | 4,606  | 41     | 195.53 | 112.11 | 317.27 | 7    |
|                               |                 | 2000  | 2,690  | 1,570  | 5,069  | 44     | 181.51 | 105.92 | 341.98 | 12   |
|                               |                 | 2001  | 3,208  | 1,530  | 5,652  | 37     | 209.89 | 100.08 | 369.73 | 8    |
|                               |                 | 2002  | 3,019  | 1,516  | 6,256  | 42     | 189.46 | 95.12  | 392.57 | 9    |
|                               |                 | 2003  | 3,231  | 1,503  | 6,968  | 39     | 193.84 | 90.18  | 418.10 | 12   |
|                               |                 | 2004  | 3,455  | 1,485  | 7,714  | 38     | 197.13 | 84.75  | 440.19 | 13   |
|                               |                 | 2005  | 3,703  | 1,458  | 8,556  | 35     | 200.49 | 78.93  | 463.21 | 13   |
|                               |                 | 2006  | 3,953  | 1,415  | 9,445  | 35     | 204.34 | 73.15  | 488.29 | 12   |
|                               | 2007            | 4,156 | 1,336  | 10,263 | 32     | 208.30 | 66.96  | 514.43 | 12     |      |
|                               | Old (30-64)     | 1992  | 7,911  | 6,371  | 10,936 | 42     | 334.28 | 269.22 | 462.06 | 2    |
|                               |                 | 1993  | 7,768  | 6,461  | 11,462 | 40     | 321.79 | 267.65 | 474.82 | 2    |
|                               |                 | 1994  | 8,515  | 6,498  | 12,060 | 40     | 342.31 | 261.24 | 484.81 | 1    |
|                               |                 | 1995  | 8,086  | 6,324  | 12,342 | 40     | 321.66 | 251.57 | 490.97 | 2    |
|                               |                 | 1996  | 8,122  | 6,107  | 12,703 | 38     | 319.38 | 240.14 | 499.49 | 2    |
| 1997                          |                 | 8,193 | 5,899  | 13,131 | 36     | 315.64 | 227.28 | 505.90 | 3      |      |
| 1998                          |                 | 8,384 | 5,648  | 14,155 | 35     | 316.33 | 213.11 | 534.05 | 3      |      |
| 1999                          |                 | 9,388 | 5,383  | 15,233 | 34     | 345.27 | 197.96 | 560.25 | 2      |      |
| 2000                          |                 | 8,652 | 5,049  | 16,302 | 33     | 313.63 | 183.03 | 590.93 | 3      |      |
| 2001                          |                 | 9,887 | 4,714  | 17,417 | 29     | 352.15 | 167.90 | 620.32 | 2      |      |
| 2002                          |                 | 8,812 | 4,424  | 18,260 | 32     | 307.26 | 154.26 | 636.66 | 4      |      |
| 2003                          |                 | 8,858 | 4,121  | 19,106 | 31     | 301.66 | 140.33 | 650.65 | 4      |      |
| 2004                          |                 | 8,853 | 3,806  | 19,769 | 29     | 295.24 | 126.93 | 659.28 | 4      |      |
| 2005                          |                 | 8,851 | 3,484  | 20,449 | 28     | 287.91 | 113.35 | 665.20 | 4      |      |
| 2006                          |                 | 8,814 | 3,155  | 21,062 | 28     | 279.35 | 100.01 | 667.54 | 4      |      |
| 2007                          | 8,671           | 2,787 | 21,413 | 28     | 269.21 | 86.54  | 664.85 | 4      |        |      |

| Metropolitan Statistical Area | PWID Population | Year   | Number             | Min    | Max    | Rank   | Rate   | Min    | Max    | Rank  |        |    |
|-------------------------------|-----------------|--------|--------------------|--------|--------|--------|--------|--------|--------|-------|--------|----|
| Baltimore, MD                 | Total           | 1992   | 30,776             | 19,280 | 40,482 | 7      | 188.62 | 118.16 | 248.10 | 18    |        |    |
|                               |                 | 1993   | 34,566             | 20,301 | 42,602 | 6      | 211.33 | 124.12 | 260.46 | 10    |        |    |
|                               |                 | 1994   | 34,566             | 21,762 | 44,825 | 6      | 210.13 | 132.29 | 272.49 | 13    |        |    |
|                               |                 | 1995   | 37,446             | 23,109 | 47,026 | 6      | 226.56 | 139.82 | 284.52 | 6     |        |    |
|                               |                 | 1996   | 39,323             | 25,482 | 49,297 | 5      | 236.27 | 153.11 | 296.19 | 5     |        |    |
|                               |                 | 1997   | 41,613             | 29,258 | 51,501 | 5      | 248.76 | 174.90 | 307.87 | 4     |        |    |
|                               |                 | 1998   | 44,091             | 32,859 | 53,683 | 5      | 262.55 | 195.66 | 319.66 | 3     |        |    |
|                               |                 | 1999   | 47,873             | 36,195 | 56,124 | 4      | 282.73 | 213.76 | 331.45 | 2     |        |    |
|                               |                 | 2000   | 49,971             | 39,559 | 57,809 | 5      | 292.36 | 231.44 | 338.22 | 1     |        |    |
|                               |                 | 2001   | 53,777             | 42,836 | 59,601 | 4      | 311.28 | 247.95 | 344.99 | 1     |        |    |
|                               |                 | 2002   | 56,158             | 46,030 | 63,228 | 4      | 321.17 | 263.25 | 361.60 | 1     |        |    |
|                               |                 | 2003   | 58,353             | 47,090 | 67,836 | 4      | 329.95 | 266.26 | 383.57 | 1     |        |    |
|                               |                 | 2004   | 59,271             | 44,419 | 72,607 | 4      | 332.14 | 248.91 | 406.87 | 1     |        |    |
|                               |                 | 2005   | 59,435             | 38,593 | 77,677 | 4      | 330.23 | 214.43 | 431.59 | 1     |        |    |
|                               |                 | 2006   | 59,508             | 32,362 | 83,014 | 4      | 327.98 | 178.36 | 457.53 | 1     |        |    |
|                               |                 | 2007   | 59,113             | 25,142 | 88,079 | 4      | 324.57 | 138.05 | 483.61 | 1     |        |    |
|                               |                 |        | Non-Hispanic White | 1992   | 7,727  | 4,840  | 10,163 | 27     | 67.34  | 42.19 | 88.58  | 57 |
|                               |                 |        |                    | 1993   | 9,108  | 5,349  | 11,225 | 22     | 79.77  | 46.85 | 98.31  | 47 |
|                               |                 |        |                    | 1994   | 9,555  | 6,015  | 12,390 | 22     | 83.72  | 52.71 | 108.56 | 46 |
|                               |                 |        |                    | 1995   | 10,845 | 6,693  | 13,620 | 15     | 95.13  | 58.71 | 119.47 | 37 |
| 1996                          | 11,908          |        |                    | 7,717  | 14,929 | 13     | 104.41 | 67.66  | 130.90 | 29    |        |    |
| 1997                          | 13,140          |        |                    | 9,239  | 16,263 | 9      | 115.41 | 81.15  | 142.84 | 21    |        |    |
| 1998                          | 14,470          |        |                    | 10,784 | 17,618 | 7      | 127.31 | 94.88  | 155.00 | 17    |        |    |
| 1999                          | 16,265          |        |                    | 12,297 | 19,068 | 5      | 142.77 | 107.94 | 167.37 | 12    |        |    |
| 2000                          | 17,500          |        |                    | 13,854 | 20,245 | 5      | 152.90 | 121.04 | 176.88 | 6     |        |    |
| 2001                          | 19,320          |        |                    | 15,389 | 21,412 | 5      | 168.02 | 133.84 | 186.22 | 7     |        |    |
| 2002                          | 20,589          |        |                    | 16,876 | 23,181 | 5      | 178.10 | 145.98 | 200.52 | 5     |        |    |
| 2003                          | 21,709          |        |                    | 17,519 | 25,238 | 5      | 186.99 | 150.90 | 217.38 | 5     |        |    |
| 2004                          | 22,242          |        |                    | 16,668 | 27,246 | 5      | 191.35 | 143.41 | 234.41 | 6     |        |    |
| 2005                          | 22,351          |        |                    | 14,514 | 29,211 | 5      | 192.22 | 124.81 | 251.21 | 6     |        |    |
| 2006                          | 22,274          | 12,113 | 31,072             | 4      | 191.84 | 104.33 | 267.62 | 7      |        |       |        |    |
| 2007                          | 21,864          | 9,299  | 32,577             | 4      | 189.13 | 80.44  | 281.81 | 7      |        |       |        |    |

| Metropolitan Statistical Area | PWID Population    | Year | Number   | Min    | Max    | Rank  | Rate   | Min    | Max    | Rank  |       |    |
|-------------------------------|--------------------|------|----------|--------|--------|-------|--------|--------|--------|-------|-------|----|
| Baltimore, MD                 | Non-Hispanic Black | 1992 | 20,385   | 12,770 | 26,813 | 4     | 483.93 | 303.16 | 636.53 | 17    |       |    |
|                               |                    | 1993 | 22,802   | 13,392 | 28,103 | 2     | 534.38 | 313.84 | 658.61 | 11    |       |    |
|                               |                    | 1994 | 22,560   | 14,204 | 29,256 | 2     | 521.36 | 328.24 | 676.09 | 8     |       |    |
|                               |                    | 1995 | 24,048   | 14,840 | 30,199 | 2     | 548.23 | 338.33 | 688.48 | 8     |       |    |
|                               |                    | 1996 | 24,731   | 16,026 | 31,004 | 2     | 554.99 | 359.65 | 695.75 | 6     |       |    |
|                               |                    | 1997 | 25,535   | 17,954 | 31,602 | 2     | 565.52 | 397.61 | 699.89 | 5     |       |    |
|                               |                    | 1998 | 26,330   | 19,622 | 32,058 | 2     | 576.98 | 429.99 | 702.49 | 5     |       |    |
|                               |                    | 1999 | 27,788   | 21,009 | 32,577 | 1     | 600.64 | 454.12 | 704.15 | 4     |       |    |
|                               |                    | 2000 | 28,207   | 22,330 | 32,632 | 1     | 602.99 | 477.34 | 697.56 | 3     |       |    |
|                               |                    | 2001 | 29,594   | 23,573 | 32,799 | 1     | 622.60 | 495.93 | 690.03 | 3     |       |    |
|                               |                    | 2002 | 30,269   | 24,810 | 34,080 | 1     | 625.14 | 512.40 | 703.85 | 3     |       |    |
|                               |                    | 2003 | 31,021   | 25,033 | 36,062 | 1     | 628.74 | 507.38 | 730.92 | 4     |       |    |
|                               |                    | 2004 | 31,359   | 23,502 | 38,415 | 1     | 624.72 | 468.18 | 765.28 | 4     |       |    |
|                               |                    | 2005 | 31,639   | 20,545 | 41,350 | 1     | 619.83 | 402.48 | 810.06 | 4     |       |    |
|                               |                    | 2006 | 32,255   | 17,541 | 44,995 | 1     | 619.83 | 337.08 | 864.66 | 4     |       |    |
|                               |                    | 2007 | 33,016   | 14,042 | 49,194 | 1     | 626.85 | 266.61 | 934.02 | 4     |       |    |
|                               |                    |      | Hispanic | 1992   | 172    | 108   | 227    | 71     | 74.67  | 46.77 | 98.21 | 68 |
|                               |                    |      |          | 1993   | 174    | 102   | 215    | 68     | 71.29  | 41.87 | 87.86 | 65 |
|                               |                    |      |          | 1994   | 165    | 104   | 214    | 72     | 63.84  | 40.19 | 82.79 | 76 |
|                               |                    |      |          | 1995   | 176    | 109   | 222    | 69     | 65.38  | 40.35 | 82.11 | 66 |
| 1996                          | 190                |      |          | 123    | 238    | 66    | 66.98  | 43.41  | 83.97  | 64    |       |    |
| 1997                          | 213                |      |          | 150    | 264    | 65    | 70.97  | 49.90  | 87.83  | 58    |       |    |
| 1998                          | 246                |      |          | 184    | 300    | 63    | 77.64  | 57.86  | 94.53  | 54    |       |    |
| 1999                          | 298                |      |          | 225    | 349    | 62    | 88.44  | 66.87  | 103.68 | 51    |       |    |
| 2000                          | 351                |      |          | 278    | 406    | 61    | 98.04  | 77.61  | 113.42 | 43    |       |    |
| 2001                          | 432                |      |          | 344    | 479    | 58    | 112.94 | 89.96  | 125.17 | 37    |       |    |
| 2002                          | 518                |      |          | 425    | 584    | 56    | 126.93 | 104.04 | 142.91 | 31    |       |    |
| 2003                          | 619                |      |          | 500    | 720    | 55    | 142.45 | 114.96 | 165.60 | 22    |       |    |
| 2004                          | 720                |      |          | 540    | 882    | 53    | 155.47 | 116.51 | 190.45 | 20    |       |    |
| 2005                          | 820                |      |          | 532    | 1,071  | 52    | 166.12 | 107.87 | 217.11 | 19    |       |    |
| 2006                          | 920                | 500  | 1,283    | 52     | 174.38 | 94.83 | 243.26 | 19     |        |       |       |    |
| 2007                          | 1,007              | 428  | 1,500    | 49     | 179.97 | 76.55 | 268.16 | 19     |        |       |       |    |

| Metropolitan Statistical Area | PWID Population | Year   | Number | Min    | Max    | Rank   | Rate   | Min    | Max    | Rank   |    |
|-------------------------------|-----------------|--------|--------|--------|--------|--------|--------|--------|--------|--------|----|
| Baltimore, MD                 | Male            | 1992   | 18,827 | 11,794 | 24,764 | 7      | 235.66 | 147.63 | 309.97 | 23     |    |
|                               |                 | 1993   | 21,182 | 12,440 | 26,106 | 8      | 264.83 | 155.54 | 326.40 | 11     |    |
|                               |                 | 1994   | 21,219 | 13,359 | 27,517 | 6      | 263.93 | 166.16 | 342.26 | 15     |    |
|                               |                 | 1995   | 23,024 | 14,209 | 28,914 | 6      | 285.21 | 176.01 | 358.17 | 7      |    |
|                               |                 | 1996   | 24,208 | 15,687 | 30,348 | 6      | 298.05 | 193.15 | 373.65 | 4      |    |
|                               |                 | 1997   | 25,637 | 18,025 | 31,728 | 5      | 314.39 | 221.05 | 389.09 | 4      |    |
|                               |                 | 1998   | 27,165 | 20,245 | 33,074 | 5      | 332.44 | 247.75 | 404.76 | 2      |    |
|                               |                 | 1999   | 29,471 | 22,282 | 34,550 | 5      | 358.06 | 270.71 | 419.77 | 1      |    |
|                               |                 | 2000   | 30,706 | 24,307 | 35,522 | 5      | 369.84 | 292.77 | 427.85 | 1      |    |
|                               |                 | 2001   | 32,943 | 26,241 | 36,511 | 5      | 392.66 | 312.77 | 435.18 | 1      |    |
|                               |                 | 2002   | 34,247 | 28,070 | 38,558 | 5      | 403.35 | 330.61 | 454.13 | 1      |    |
|                               |                 | 2003   | 35,368 | 28,541 | 41,116 | 4      | 412.02 | 332.49 | 478.98 | 1      |    |
|                               |                 | 2004   | 35,639 | 26,708 | 43,657 | 4      | 411.78 | 308.60 | 504.43 | 1      |    |
|                               |                 | 2005   | 35,378 | 22,972 | 46,236 | 4      | 405.31 | 263.18 | 529.71 | 1      |    |
|                               | 2006            | 34,981 | 19,024 | 48,799 | 4      | 397.22 | 216.02 | 554.12 | 1      |        |    |
|                               | 2007            | 34,224 | 14,556 | 50,994 | 4      | 386.90 | 164.56 | 576.48 | 2      |        |    |
|                               |                 | Female | 1992   | 11,808 | 7,397  | 15,532 | 5      | 141.80 | 88.83  | 186.52 | 16 |
|                               |                 |        | 1993   | 13,310 | 7,817  | 16,404 | 5      | 159.24 | 93.52  | 196.27 | 6  |
|                               |                 |        | 1994   | 13,354 | 8,408  | 17,318 | 5      | 158.79 | 99.97  | 205.91 | 7  |
|                               |                 |        | 1995   | 14,514 | 8,957  | 18,227 | 5      | 171.65 | 105.93 | 215.56 | 5  |
|                               |                 |        | 1996   | 15,291 | 9,909  | 19,170 | 4      | 179.44 | 116.28 | 224.96 | 4  |
|                               |                 |        | 1997   | 16,236 | 11,416 | 20,094 | 4      | 189.37 | 133.15 | 234.37 | 4  |
|                               |                 |        | 1998   | 17,266 | 12,867 | 21,022 | 4      | 200.24 | 149.23 | 243.80 | 4  |
|                               |                 |        | 1999   | 18,822 | 14,231 | 22,066 | 3      | 216.29 | 163.53 | 253.57 | 3  |
|                               |                 |        | 2000   | 19,735 | 15,623 | 22,830 | 4      | 224.52 | 177.74 | 259.74 | 3  |
|                               |                 |        | 2001   | 21,346 | 17,003 | 23,658 | 3      | 240.21 | 191.34 | 266.22 | 3  |
|                               | 2002            |        | 22,420 | 18,377 | 25,243 | 3      | 249.26 | 204.30 | 280.64 | 1      |    |
|                               | 2003            |        | 23,451 | 18,925 | 27,262 | 3      | 257.67 | 207.93 | 299.54 | 1      |    |
|                               | 2004            | 24,001 | 17,987 | 29,401 | 2      | 261.16 | 195.72 | 319.91 | 1      |        |    |
|                               | 2005            | 24,277 | 15,764 | 31,728 | 2      | 261.91 | 170.06 | 342.29 | 1      |        |    |
|                               | 2006            | 24,548 | 13,350 | 34,244 | 1      | 262.90 | 142.97 | 366.74 | 1      |        |    |
|                               | 2007            | 24,661 | 10,489 | 36,744 | 1      | 263.28 | 111.98 | 392.28 | 1      |        |    |

| Metropolitan Statistical Area | PWID Population | Year        | Number | Min    | Max    | Rank   | Rate   | Min    | Max    | Rank   |    |
|-------------------------------|-----------------|-------------|--------|--------|--------|--------|--------|--------|--------|--------|----|
| Baltimore, MD                 | Young (15-29)   | 1992        | 7,774  | 4,870  | 10,225 | 12     | 148.67 | 93.13  | 195.55 | 16     |    |
|                               |                 | 1993        | 8,455  | 4,966  | 10,420 | 7      | 166.08 | 97.54  | 204.69 | 12     |    |
|                               |                 | 1994        | 8,323  | 5,240  | 10,793 | 7      | 167.38 | 105.38 | 217.06 | 14     |    |
|                               |                 | 1995        | 9,003  | 5,556  | 11,307 | 6      | 184.28 | 113.72 | 231.42 | 6      |    |
|                               |                 | 1996        | 9,552  | 6,190  | 11,975 | 6      | 197.45 | 127.95 | 247.53 | 3      |    |
|                               |                 | 1997        | 10,307 | 7,246  | 12,755 | 5      | 213.97 | 150.44 | 264.81 | 2      |    |
|                               |                 | 1998        | 11,208 | 8,353  | 13,646 | 5      | 233.15 | 173.75 | 283.87 | 1      |    |
|                               |                 | 1999        | 12,540 | 9,481  | 14,701 | 5      | 259.34 | 196.08 | 304.04 | 1      |    |
|                               |                 | 2000        | 13,508 | 10,694 | 15,627 | 5      | 277.34 | 219.55 | 320.84 | 1      |    |
|                               |                 | 2001        | 14,988 | 11,939 | 16,612 | 4      | 304.73 | 242.73 | 337.73 | 1      |    |
|                               |                 | 2002        | 16,085 | 13,184 | 18,110 | 4      | 322.27 | 264.15 | 362.85 | 1      |    |
|                               |                 | 2003        | 17,082 | 13,785 | 19,858 | 4      | 335.31 | 270.59 | 389.80 | 1      |    |
|                               |                 | 2004        | 17,597 | 13,187 | 21,556 | 4      | 338.22 | 253.47 | 414.32 | 1      |    |
|                               |                 | 2005        | 17,721 | 11,507 | 23,160 | 4      | 333.43 | 216.51 | 435.77 | 1      |    |
|                               | 2006            | 17,606      | 9,575  | 24,561 | 4      | 323.87 | 176.13 | 451.80 | 1      |        |    |
|                               | 2007            | 17,108      | 7,277  | 25,492 | 3      | 310.55 | 132.08 | 462.73 | 1      |        |    |
|                               |                 | Old (30-64) | 1992   | 23,449 | 14,690 | 30,844 | 7      | 211.49 | 132.49 | 278.18 | 18 |
|                               |                 |             | 1993   | 26,333 | 15,465 | 32,455 | 6      | 233.75 | 137.28 | 288.09 | 9  |
|                               |                 |             | 1994   | 26,315 | 16,567 | 34,124 | 6      | 229.27 | 144.34 | 297.32 | 12 |
|                               |                 |             | 1995   | 28,471 | 17,570 | 35,754 | 6      | 244.54 | 150.91 | 307.09 | 7  |
|                               |                 |             | 1996   | 29,836 | 19,334 | 37,403 | 5      | 252.72 | 163.77 | 316.82 | 7  |
| 1997                          |                 |             | 31,474 | 22,129 | 38,952 | 5      | 264.24 | 185.79 | 327.03 | 4      |    |
| 1998                          |                 |             | 33,200 | 24,742 | 40,423 | 5      | 276.98 | 206.42 | 337.23 | 4      |    |
| 1999                          |                 |             | 35,831 | 27,091 | 42,007 | 4      | 296.19 | 223.94 | 347.24 | 4      |    |
| 2000                          |                 |             | 37,112 | 29,379 | 42,933 | 4      | 303.67 | 240.39 | 351.30 | 4      |    |
| 2001                          |                 |             | 39,555 | 31,508 | 43,839 | 3      | 320.09 | 254.97 | 354.76 | 4      |    |
| 2002                          |                 |             | 40,828 | 33,464 | 45,968 | 4      | 326.77 | 267.84 | 367.91 | 2      |    |
| 2003                          |                 |             | 41,843 | 33,766 | 48,643 | 3      | 332.32 | 268.17 | 386.32 | 2      |    |
| 2004                          |                 |             | 41,819 | 31,341 | 51,229 | 3      | 330.79 | 247.90 | 405.21 | 2      |    |
| 2005                          |                 |             | 41,149 | 26,720 | 53,779 | 3      | 324.44 | 210.67 | 424.01 | 2      |    |
| 2006                          | 40,290          | 21,911      | 56,204 | 3      | 317.05 | 172.42 | 442.28 | 3      |        |        |    |
| 2007                          | 38,966          | 16,573      | 58,059 | 3      | 306.73 | 130.46 | 457.03 | 3      |        |        |    |



| Metropolitan Statistical Area | PWID Population | Year  | Number             | Min   | Max    | Rank  | Rate   | Min   | Max    | Rank  |       |    |
|-------------------------------|-----------------|-------|--------------------|-------|--------|-------|--------|-------|--------|-------|-------|----|
| Bergen--Passaic, NJ           | Total           | 1992  | 8,576              | 6,873 | 10,099 | 53    | 98.44  | 78.89 | 115.93 | 55    |       |    |
|                               |                 | 1993  | 8,255              | 6,733 | 9,590  | 47    | 94.65  | 77.21 | 109.97 | 53    |       |    |
|                               |                 | 1994  | 8,051              | 6,613 | 9,086  | 55    | 92.19  | 75.72 | 104.04 | 58    |       |    |
|                               |                 | 1995  | 7,756              | 6,513 | 8,625  | 49    | 88.46  | 74.29 | 98.37  | 56    |       |    |
|                               |                 | 1996  | 7,573              | 6,449 | 8,268  | 51    | 85.85  | 73.11 | 93.73  | 59    |       |    |
|                               |                 | 1997  | 7,436              | 6,404 | 8,307  | 53    | 83.60  | 72.00 | 93.40  | 61    |       |    |
|                               |                 | 1998  | 7,301              | 6,176 | 8,547  | 53    | 81.55  | 68.99 | 95.47  | 59    |       |    |
|                               |                 | 1999  | 7,259              | 5,733 | 8,977  | 58    | 80.77  | 63.79 | 99.88  | 64    |       |    |
|                               |                 | 2000  | 7,000              | 5,271 | 9,327  | 56    | 77.47  | 58.33 | 103.23 | 64    |       |    |
|                               |                 | 2001  | 6,901              | 5,026 | 9,288  | 61    | 75.94  | 55.31 | 102.21 | 66    |       |    |
|                               |                 | 2002  | 6,630              | 5,057 | 8,779  | 60    | 72.72  | 55.46 | 96.28  | 66    |       |    |
|                               |                 | 2003  | 6,418              | 5,369 | 7,983  | 63    | 70.25  | 58.77 | 87.38  | 68    |       |    |
|                               |                 | 2004  | 6,380              | 5,441 | 7,329  | 65    | 69.70  | 59.44 | 80.07  | 68    |       |    |
|                               |                 | 2005  | 6,378              | 5,152 | 7,205  | 68    | 69.58  | 56.20 | 78.59  | 70    |       |    |
|                               |                 | 2006  | 6,393              | 4,879 | 8,196  | 68    | 69.59  | 53.11 | 89.22  | 69    |       |    |
|                               |                 | 2007  | 6,432              | 4,612 | 9,239  | 66    | 69.79  | 50.05 | 100.24 | 69    |       |    |
|                               |                 |       | Non-Hispanic White | 1992  | 5,083  | 4,074 | 5,986  | 47    | 81.44  | 65.27 | 95.91 | 47 |
|                               |                 |       |                    | 1993  | 4,533  | 3,698 | 5,267  | 49    | 73.67  | 60.09 | 85.59 | 54 |
|                               |                 |       |                    | 1994  | 4,160  | 3,416 | 4,694  | 57    | 68.48  | 56.25 | 77.28 | 54 |
|                               |                 |       |                    | 1995  | 3,835  | 3,220 | 4,264  | 54    | 63.78  | 53.57 | 70.93 | 56 |
|                               |                 |       |                    | 1996  | 3,645  | 3,104 | 3,979  | 59    | 61.19  | 52.11 | 66.81 | 58 |
| 1997                          | 3,540           |       |                    | 3,048 | 3,954  | 58    | 59.83  | 51.53 | 66.84  | 60    |       |    |
| 1998                          | 3,486           |       |                    | 2,949 | 4,081  | 61    | 59.38  | 50.23 | 69.52  | 61    |       |    |
| 1999                          | 3,516           |       |                    | 2,777 | 4,348  | 64    | 60.53  | 47.80 | 74.85  | 62    |       |    |
| 2000                          | 3,471           |       |                    | 2,613 | 4,625  | 58    | 60.29  | 45.40 | 80.33  | 62    |       |    |
| 2001                          | 3,524           |       |                    | 2,566 | 4,742  | 64    | 61.83  | 45.03 | 83.21  | 62    |       |    |
| 2002                          | 3,498           |       |                    | 2,668 | 4,631  | 62    | 62.08  | 47.35 | 82.19  | 63    |       |    |
| 2003                          | 3,502           |       |                    | 2,930 | 4,356  | 63    | 62.91  | 52.64 | 78.26  | 64    |       |    |
| 2004                          | 3,596           |       |                    | 3,066 | 4,131  | 64    | 65.35  | 55.74 | 75.08  | 62    |       |    |
| 2005                          | 3,702           |       |                    | 2,991 | 4,182  | 63    | 68.06  | 54.98 | 76.88  | 57    |       |    |
| 2006                          | 3,804           |       |                    | 2,904 | 4,878  | 61    | 70.75  | 54.00 | 90.71  | 56    |       |    |
| 2007                          | 3,902           | 2,798 | 5,604              | 62    | 73.23  | 52.51 | 105.18 | 54    |        |       |       |    |

| Metropolitan Statistical Area | PWID Population    | Year  | Number | Min   | Max   | Rank   | Rate   | Min    | Max    | Rank |
|-------------------------------|--------------------|-------|--------|-------|-------|--------|--------|--------|--------|------|
| Bergen--Passaic, NJ           | Non-Hispanic Black | 1992  | 2,207  | 1,768 | 2,599 | 51     | 304.23 | 243.81 | 358.28 | 48   |
|                               |                    | 1993  | 2,119  | 1,729 | 2,462 | 48     | 291.92 | 238.11 | 339.15 | 46   |
|                               |                    | 1994  | 2,052  | 1,685 | 2,315 | 52     | 281.38 | 231.10 | 317.53 | 47   |
|                               |                    | 1995  | 1,955  | 1,642 | 2,174 | 48     | 267.23 | 224.42 | 297.17 | 44   |
|                               |                    | 1996  | 1,884  | 1,605 | 2,057 | 49     | 256.03 | 218.03 | 279.52 | 44   |
|                               |                    | 1997  | 1,825  | 1,572 | 2,039 | 48     | 246.46 | 212.25 | 275.33 | 42   |
|                               |                    | 1998  | 1,769  | 1,496 | 2,071 | 49     | 237.87 | 201.24 | 278.50 | 37   |
|                               |                    | 1999  | 1,741  | 1,375 | 2,153 | 49     | 234.16 | 184.92 | 289.57 | 35   |
|                               |                    | 2000  | 1,668  | 1,256 | 2,222 | 52     | 223.46 | 168.25 | 297.74 | 34   |
|                               |                    | 2001  | 1,643  | 1,197 | 2,211 | 53     | 218.66 | 159.25 | 294.29 | 28   |
|                               |                    | 2002  | 1,588  | 1,211 | 2,103 | 51     | 210.81 | 160.79 | 279.12 | 32   |
|                               |                    | 2003  | 1,560  | 1,306 | 1,941 | 52     | 207.58 | 173.68 | 258.21 | 31   |
|                               |                    | 2004  | 1,590  | 1,356 | 1,827 | 48     | 212.01 | 180.81 | 243.56 | 26   |
|                               |                    | 2005  | 1,649  | 1,332 | 1,862 | 44     | 220.25 | 177.91 | 248.78 | 23   |
|                               |                    | 2006  | 1,735  | 1,324 | 2,224 | 42     | 231.78 | 176.91 | 297.18 | 21   |
|                               | 2007               | 1,857 | 1,332  | 2,667 | 40    | 247.95 | 177.80 | 356.13 | 20     |      |
|                               | Hispanic           | 1992  | 1,507  | 1,208 | 1,775 | 37     | 126.13 | 101.08 | 148.54 | 52   |
|                               |                    | 1993  | 1,522  | 1,241 | 1,768 | 36     | 121.54 | 99.13  | 141.20 | 47   |
|                               |                    | 1994  | 1,548  | 1,272 | 1,747 | 37     | 118.62 | 97.42  | 133.86 | 47   |
|                               |                    | 1995  | 1,548  | 1,300 | 1,721 | 37     | 113.59 | 95.39  | 126.31 | 46   |
|                               |                    | 1996  | 1,562  | 1,330 | 1,705 | 37     | 109.38 | 93.14  | 119.41 | 45   |
| 1997                          |                    | 1,578 | 1,359  | 1,763 | 38    | 105.53 | 90.89  | 117.90 | 41     |      |
| 1998                          |                    | 1,590 | 1,345  | 1,862 | 38    | 102.05 | 86.34  | 119.48 | 42     |      |
| 1999                          |                    | 1,619 | 1,279  | 2,003 | 38    | 100.41 | 79.30  | 124.17 | 42     |      |
| 2000                          |                    | 1,597 | 1,203  | 2,128 | 38    | 95.67  | 72.03  | 127.47 | 46     |      |
| 2001                          |                    | 1,609 | 1,172  | 2,166 | 38    | 92.75  | 67.55  | 124.83 | 43     |      |
| 2002                          |                    | 1,581 | 1,206  | 2,094 | 38    | 88.21  | 67.28  | 116.80 | 46     |      |
| 2003                          |                    | 1,567 | 1,311  | 1,949 | 38    | 84.74  | 70.90  | 105.41 | 45     |      |
| 2004                          |                    | 1,599 | 1,363  | 1,836 | 38    | 84.09  | 71.71  | 96.60  | 45     |      |
| 2005                          |                    | 1,646 | 1,329  | 1,859 | 38    | 84.32  | 68.11  | 95.24  | 45     |      |
| 2006                          |                    | 1,706 | 1,302  | 2,187 | 38    | 85.24  | 65.06  | 109.29 | 44     |      |
| 2007                          | 1,785              | 1,280 | 2,564  | 36    | 86.92 | 62.33  | 124.85 | 44     |        |      |

| Metropolitan Statistical Area | PWID Population | Year   | Number | Min   | Max   | Rank  | Rate   | Min    | Max    | Rank  |    |
|-------------------------------|-----------------|--------|--------|-------|-------|-------|--------|--------|--------|-------|----|
| Bergen--Passaic, NJ           | Male            | 1992   | 5,672  | 4,545 | 6,679 | 53    | 132.85 | 106.47 | 156.46 | 55    |    |
|                               |                 | 1993   | 5,423  | 4,423 | 6,300 | 47    | 126.87 | 103.49 | 147.40 | 54    |    |
|                               |                 | 1994   | 5,271  | 4,329 | 5,949 | 54    | 123.10 | 101.11 | 138.92 | 55    |    |
|                               |                 | 1995   | 5,076  | 4,262 | 5,644 | 48    | 118.01 | 99.10  | 131.23 | 56    |    |
|                               |                 | 1996   | 4,966  | 4,229 | 5,421 | 51    | 114.75 | 97.72  | 125.28 | 56    |    |
|                               |                 | 1997   | 4,894  | 4,215 | 5,468 | 49    | 112.17 | 96.60  | 125.31 | 56    |    |
|                               |                 | 1998   | 4,831  | 4,087 | 5,656 | 53    | 109.97 | 93.03  | 128.75 | 56    |    |
|                               |                 | 1999   | 4,832  | 3,816 | 5,976 | 55    | 109.51 | 86.48  | 135.42 | 61    |    |
|                               |                 | 2000   | 4,690  | 3,531 | 6,249 | 53    | 105.72 | 79.60  | 140.86 | 58    |    |
|                               |                 | 2001   | 4,652  | 3,388 | 6,261 | 57    | 104.13 | 75.84  | 140.15 | 61    |    |
|                               |                 | 2002   | 4,495  | 3,428 | 5,951 | 55    | 100.18 | 76.41  | 132.64 | 61    |    |
|                               |                 | 2003   | 4,370  | 3,657 | 5,436 | 56    | 97.12  | 81.26  | 120.80 | 63    |    |
|                               |                 | 2004   | 4,358  | 3,716 | 5,006 | 58    | 96.54  | 82.33  | 110.90 | 61    |    |
|                               |                 | 2005   | 4,362  | 3,523 | 4,927 | 58    | 96.36  | 77.84  | 108.85 | 61    |    |
|                               | 2006            | 4,366  | 3,332  | 5,597 | 58    | 96.17 | 73.40  | 123.31 | 63     |       |    |
|                               | 2007            | 4,374  | 3,137  | 6,283 | 58    | 95.90 | 68.77  | 137.74 | 62     |       |    |
|                               |                 | Female | 1992   | 2,909 | 2,331 | 3,426 | 51     | 65.48  | 52.48  | 77.12 | 56 |
|                               |                 |        | 1993   | 2,841 | 2,317 | 3,300 | 47     | 63.88  | 52.10  | 74.21 | 54 |
|                               |                 |        | 1994   | 2,796 | 2,296 | 3,155 | 55     | 62.82  | 51.59  | 70.89 | 61 |
|                               |                 |        | 1995   | 2,706 | 2,273 | 3,010 | 53     | 60.59  | 50.89  | 67.38 | 59 |
|                               |                 |        | 1996   | 2,645 | 2,252 | 2,888 | 53     | 58.86  | 50.12  | 64.26 | 60 |
|                               |                 |        | 1997   | 2,591 | 2,231 | 2,894 | 55     | 57.18  | 49.24  | 63.88 | 61 |
|                               |                 |        | 1998   | 2,531 | 2,141 | 2,963 | 58     | 55.50  | 46.95  | 64.98 | 67 |
|                               |                 |        | 1999   | 2,498 | 1,973 | 3,089 | 61     | 54.60  | 43.12  | 67.52 | 68 |
|                               |                 |        | 2000   | 2,387 | 1,797 | 3,180 | 61     | 51.90  | 39.07  | 69.15 | 68 |
|                               |                 |        | 2001   | 2,329 | 1,696 | 3,135 | 67     | 50.42  | 36.72  | 67.86 | 75 |
|                               | 2002            |        | 2,214  | 1,689 | 2,931 | 66    | 47.81  | 36.46  | 63.30  | 75    |    |
|                               | 2003            |        | 2,120  | 1,774 | 2,637 | 68    | 45.73  | 38.26  | 56.89  | 78    |    |
|                               | 2004            | 2,086  | 1,779  | 2,396 | 73    | 44.96 | 38.34  | 51.65  | 81     |       |    |
|                               | 2005            | 2,067  | 1,669  | 2,334 | 74    | 44.52 | 35.97  | 50.29  | 81     |       |    |
|                               | 2006            | 2,056  | 1,570  | 2,637 | 76    | 44.25 | 33.78  | 56.74  | 80     |       |    |
|                               | 2007            | 2,059  | 1,477  | 2,958 | 76    | 44.24 | 31.72  | 63.54  | 80     |       |    |

| Metropolitan Statistical Area | PWID Population | Year        | Number | Min   | Max   | Rank  | Rate  | Min    | Max    | Rank   |    |
|-------------------------------|-----------------|-------------|--------|-------|-------|-------|-------|--------|--------|--------|----|
| Bergen--Passaic, NJ           | Young (15-29)   | 1992        | 2,486  | 1,992 | 2,927 | 45    | 93.59 | 75.01  | 110.22 | 47     |    |
|                               |                 | 1993        | 2,344  | 1,912 | 2,724 | 43    | 90.58 | 73.89  | 105.24 | 46     |    |
|                               |                 | 1994        | 2,269  | 1,864 | 2,561 | 46    | 89.70 | 73.67  | 101.23 | 45     |    |
|                               |                 | 1995        | 2,193  | 1,841 | 2,438 | 46    | 88.15 | 74.03  | 98.03  | 49     |    |
|                               |                 | 1996        | 2,166  | 1,844 | 2,364 | 47    | 88.07 | 75.00  | 96.15  | 51     |    |
|                               |                 | 1997        | 2,164  | 1,864 | 2,418 | 52    | 88.53 | 76.24  | 98.90  | 48     |    |
|                               |                 | 1998        | 2,172  | 1,837 | 2,543 | 51    | 89.03 | 75.32  | 104.24 | 47     |    |
|                               |                 | 1999        | 2,211  | 1,746 | 2,734 | 55    | 91.03 | 71.89  | 112.57 | 46     |    |
|                               |                 | 2000        | 2,182  | 1,643 | 2,908 | 52    | 89.69 | 67.53  | 119.51 | 51     |    |
|                               |                 | 2001        | 2,197  | 1,600 | 2,957 | 59    | 90.92 | 66.22  | 122.37 | 52     |    |
|                               |                 | 2002        | 2,146  | 1,637 | 2,842 | 60    | 89.24 | 68.07  | 118.16 | 53     |    |
|                               |                 | 2003        | 2,100  | 1,757 | 2,612 | 65    | 87.33 | 73.06  | 108.63 | 58     |    |
|                               |                 | 2004        | 2,092  | 1,784 | 2,403 | 66    | 86.76 | 73.99  | 99.67  | 58     |    |
|                               |                 | 2005        | 2,076  | 1,677 | 2,344 | 71    | 85.33 | 68.93  | 96.39  | 59     |    |
|                               | 2006            | 2,039       | 1,557  | 2,615 | 72    | 83.31 | 63.58 | 106.81 | 63     |        |    |
|                               | 2007            | 1,983       | 1,422  | 2,848 | 72    | 80.03 | 57.39 | 114.95 | 63     |        |    |
|                               |                 | Old (30-64) | 1992   | 6,182 | 4,954 | 7,280 | 56    | 102.07 | 81.80  | 120.21 | 63 |
|                               |                 |             | 1993   | 5,954 | 4,857 | 6,917 | 51    | 97.08  | 79.19  | 112.79 | 61 |
|                               |                 |             | 1994   | 5,805 | 4,768 | 6,551 | 58    | 93.58  | 76.86  | 105.60 | 67 |
|                               |                 |             | 1995   | 5,585 | 4,690 | 6,211 | 54    | 88.93  | 74.68  | 98.89  | 67 |
|                               |                 |             | 1996   | 5,441 | 4,634 | 5,941 | 55    | 85.53  | 72.83  | 93.38  | 68 |
|                               | 1997            |             | 5,325  | 4,586 | 5,949 | 56    | 82.57 | 71.11  | 92.25  | 67     |    |
|                               | 1998            |             | 5,206  | 4,404 | 6,095 | 59    | 79.93 | 67.62  | 93.58  | 66     |    |
|                               | 1999            |             | 5,148  | 4,066 | 6,367 | 58    | 78.50 | 61.99  | 97.07  | 71     |    |
|                               | 2000            |             | 4,933  | 3,714 | 6,572 | 59    | 74.71 | 56.25  | 99.54  | 63     |    |
|                               | 2001            |             | 4,826  | 3,515 | 6,496 | 61    | 72.35 | 52.69  | 97.37  | 72     |    |
|                               | 2002            |             | 4,598  | 3,507 | 6,089 | 60    | 68.50 | 52.25  | 90.70  | 66     |    |
|                               | 2003            |             | 4,411  | 3,691 | 5,487 | 61    | 65.53 | 54.83  | 81.52  | 67     |    |
|                               | 2004            |             | 4,344  | 3,705 | 4,991 | 61    | 64.43 | 54.95  | 74.02  | 67     |    |
|                               | 2005            |             | 4,301  | 3,474 | 4,858 | 60    | 63.85 | 51.58  | 72.13  | 68     |    |
|                               | 2006            | 4,266       | 3,256  | 5,469 | 57    | 63.30 | 48.31 | 81.16  | 63     |        |    |
|                               | 2007            | 4,243       | 3,043  | 6,094 | 57    | 62.96 | 45.15 | 90.43  | 64     |        |    |

| Metropolitan Statistical Area | PWID Population | Year  | Number             | Min   | Max   | Rank  | Rate  | Min   | Max   | Rank  |       |    |
|-------------------------------|-----------------|-------|--------------------|-------|-------|-------|-------|-------|-------|-------|-------|----|
| Birmingham, AL                | Total           | 1992  | 3,138              | 2,370 | 3,723 | 90    | 55.36 | 41.82 | 65.69 | 93    |       |    |
|                               |                 | 1993  | 2,739              | 1,410 | 3,670 | 88    | 47.73 | 24.58 | 63.97 | 94    |       |    |
|                               |                 | 1994  | 3,226              | 2,531 | 3,617 | 88    | 55.53 | 43.58 | 62.26 | 92    |       |    |
|                               |                 | 1995  | 2,779              | 1,329 | 3,625 | 89    | 47.39 | 22.67 | 61.83 | 94    |       |    |
|                               |                 | 1996  | 2,800              | 1,292 | 3,726 | 89    | 47.25 | 21.81 | 62.89 | 94    |       |    |
|                               |                 | 1997  | 2,814              | 1,257 | 3,817 | 89    | 47.14 | 21.05 | 63.94 | 94    |       |    |
|                               |                 | 1998  | 2,851              | 1,235 | 3,945 | 89    | 47.18 | 20.44 | 65.27 | 95    |       |    |
|                               |                 | 1999  | 3,433              | 2,932 | 4,057 | 86    | 56.35 | 48.12 | 66.59 | 86    |       |    |
|                               |                 | 2000  | 2,953              | 1,371 | 4,202 | 89    | 48.09 | 22.33 | 68.45 | 94    |       |    |
|                               |                 | 2001  | 3,526              | 3,048 | 4,348 | 86    | 57.02 | 49.29 | 70.31 | 85    |       |    |
|                               |                 | 2002  | 3,104              | 1,696 | 4,507 | 89    | 49.87 | 27.24 | 72.40 | 92    |       |    |
|                               |                 | 2003  | 3,225              | 1,980 | 4,689 | 89    | 51.23 | 31.46 | 74.50 | 92    |       |    |
|                               |                 | 2004  | 3,340              | 2,261 | 4,869 | 89    | 52.56 | 35.58 | 76.62 | 91    |       |    |
|                               |                 | 2005  | 3,459              | 2,545 | 5,054 | 89    | 53.89 | 39.65 | 78.74 | 90    |       |    |
|                               |                 | 2006  | 3,589              | 2,837 | 5,264 | 89    | 55.19 | 43.63 | 80.95 | 88    |       |    |
|                               |                 | 2007  | 3,699              | 2,861 | 5,449 | 89    | 56.46 | 43.67 | 83.17 | 85    |       |    |
|                               |                 |       | Non-Hispanic White | 1992  | 1,998 | 1,509 | 2,370 | 84    | 49.84 | 37.65 | 59.13 | 76 |
|                               |                 |       |                    | 1993  | 1,745 | 899   | 2,339 | 84    | 43.27 | 22.28 | 57.99 | 79 |
|                               |                 |       |                    | 1994  | 2,082 | 1,633 | 2,334 | 81    | 51.33 | 40.28 | 57.55 | 75 |
|                               |                 |       |                    | 1995  | 1,829 | 875   | 2,386 | 84    | 44.99 | 21.52 | 58.70 | 76 |
| 1996                          | 1,886           |       |                    | 870   | 2,510 | 83    | 46.19 | 21.32 | 61.47 | 72    |       |    |
| 1997                          | 1,938           |       |                    | 865   | 2,628 | 83    | 47.43 | 21.18 | 64.34 | 71    |       |    |
| 1998                          | 2,000           |       |                    | 866   | 2,766 | 81    | 48.65 | 21.08 | 67.30 | 72    |       |    |
| 1999                          | 2,437           |       |                    | 2,081 | 2,880 | 78    | 59.22 | 50.57 | 69.98 | 63    |       |    |
| 2000                          | 2,103           |       |                    | 977   | 2,993 | 83    | 51.05 | 23.71 | 72.66 | 71    |       |    |
| 2001                          | 2,491           |       |                    | 2,153 | 3,072 | 79    | 60.29 | 52.11 | 74.33 | 64    |       |    |
| 2002                          | 2,143           |       |                    | 1,171 | 3,111 | 84    | 51.77 | 28.28 | 75.16 | 72    |       |    |
| 2003                          | 2,131           |       |                    | 1,309 | 3,099 | 84    | 51.18 | 31.43 | 74.42 | 71    |       |    |
| 2004                          | 2,053           |       |                    | 1,390 | 2,993 | 85    | 49.09 | 33.24 | 71.56 | 74    |       |    |
| 2005                          | 1,896           |       |                    | 1,395 | 2,770 | 91    | 45.16 | 33.23 | 65.99 | 84    |       |    |
| 2006                          | 1,650           |       |                    | 1,304 | 2,420 | 94    | 39.03 | 30.85 | 57.25 | 89    |       |    |
| 2007                          | 1,305           | 1,009 | 1,922              | 97    | 30.77 | 23.80 | 45.32 | 98    |       |       |       |    |

| Metropolitan Statistical Area | PWID Population    | Year | Number | Min   | Max   | Rank | Rate  | Min   | Max    | Rank |
|-------------------------------|--------------------|------|--------|-------|-------|------|-------|-------|--------|------|
| Birmingham, AL                | Non-Hispanic Black | 1992 | 1,145  | 865   | 1,358 | 72   | 72.47 | 54.74 | 85.98  | 100  |
|                               |                    | 1993 | 939    | 483   | 1,258 | 78   | 58.13 | 29.94 | 77.92  | 100  |
|                               |                    | 1994 | 1,033  | 811   | 1,159 | 72   | 62.54 | 49.08 | 70.12  | 100  |
|                               |                    | 1995 | 831    | 397   | 1,084 | 78   | 49.32 | 23.59 | 64.35  | 100  |
|                               |                    | 1996 | 783    | 361   | 1,042 | 78   | 45.66 | 21.08 | 60.77  | 100  |
|                               |                    | 1997 | 741    | 331   | 1,006 | 77   | 42.58 | 19.01 | 57.76  | 100  |
|                               |                    | 1998 | 716    | 310   | 991   | 77   | 40.40 | 17.51 | 55.90  | 100  |
|                               |                    | 1999 | 836    | 714   | 988   | 68   | 46.55 | 39.75 | 55.01  | 100  |
|                               |                    | 2000 | 713    | 331   | 1,014 | 74   | 39.18 | 18.19 | 55.76  | 100  |
|                               |                    | 2001 | 867    | 749   | 1,069 | 66   | 47.11 | 40.72 | 58.08  | 100  |
|                               |                    | 2002 | 801    | 437   | 1,162 | 69   | 43.06 | 23.52 | 62.51  | 99   |
|                               |                    | 2003 | 902    | 554   | 1,311 | 65   | 47.68 | 29.28 | 69.33  | 97   |
|                               |                    | 2004 | 1,046  | 708   | 1,525 | 63   | 54.50 | 36.90 | 79.45  | 93   |
|                               |                    | 2005 | 1,250  | 920   | 1,827 | 61   | 64.04 | 47.12 | 93.57  | 91   |
|                               |                    | 2006 | 1,530  | 1,210 | 2,245 | 52   | 76.83 | 60.74 | 112.70 | 82   |
|                               |                    | 2007 | 1,878  | 1,453 | 2,767 | 39   | 93.24 | 72.12 | 137.35 | 78   |
|                               | Hispanic           | 1992 | 6      | 4     | 7     | 101  | 17.42 | 13.16 | 20.67  | 101  |
|                               |                    | 1993 | 5      | 3     | 7     | 101  | 13.44 | 6.92  | 18.01  | 101  |
|                               |                    | 1994 | 6      | 5     | 7     | 101  | 13.62 | 10.69 | 15.27  | 101  |
|                               |                    | 1995 | 5      | 3     | 7     | 101  | 10.16 | 4.86  | 13.25  | 101  |
|                               |                    | 1996 | 5      | 3     | 7     | 101  | 8.61  | 3.97  | 11.46  | 101  |
|                               |                    | 1997 | 5      | 2     | 7     | 101  | 7.40  | 3.31  | 10.04  | 101  |
|                               |                    | 1998 | 6      | 2     | 8     | 101  | 6.33  | 2.74  | 8.75   | 101  |
|                               |                    | 1999 | 7      | 6     | 8     | 101  | 6.49  | 5.54  | 7.67   | 101  |
|                               |                    | 2000 | 6      | 3     | 8     | 101  | 5.01  | 2.33  | 7.13   | 101  |
|                               |                    | 2001 | 7      | 6     | 9     | 101  | 5.72  | 4.94  | 7.05   | 101  |
|                               |                    | 2002 | 7      | 4     | 10    | 101  | 4.83  | 2.64  | 7.02   | 101  |
|                               |                    | 2003 | 7      | 4     | 11    | 101  | 4.92  | 3.02  | 7.16   | 101  |
|                               |                    | 2004 | 8      | 5     | 12    | 101  | 5.11  | 3.46  | 7.45   | 101  |
| 2005                          | 9                  | 7    | 13     | 101   | 5.38  | 3.96 | 7.86  | 101   |        |      |
| 2006                          | 10                 | 8    | 15     | 101   | 5.83  | 4.61 | 8.55  | 101   |        |      |
| 2007                          | 12                 | 9    | 18     | 100   | 6.54  | 5.06 | 9.63  | 101   |        |      |

| Metropolitan Statistical Area | PWID Population | Year   | Number | Min   | Max   | Rank  | Rate  | Min   | Max   | Rank  |    |
|-------------------------------|-----------------|--------|--------|-------|-------|-------|-------|-------|-------|-------|----|
| Birmingham, AL                | Male            | 1992   | 2,085  | 1,575 | 2,474 | 89    | 76.63 | 57.89 | 90.92 | 92    |    |
|                               |                 | 1993   | 1,803  | 928   | 2,417 | 89    | 65.37 | 33.66 | 87.61 | 95    |    |
|                               |                 | 1994   | 2,088  | 1,639 | 2,342 | 88    | 74.72 | 58.63 | 83.77 | 91    |    |
|                               |                 | 1995   | 1,758  | 841   | 2,294 | 89    | 62.23 | 29.76 | 81.19 | 95    |    |
|                               |                 | 1996   | 1,722  | 795   | 2,292 | 89    | 60.28 | 27.82 | 80.23 | 95    |    |
|                               |                 | 1997   | 1,676  | 748   | 2,273 | 89    | 58.21 | 25.99 | 78.95 | 95    |    |
|                               |                 | 1998   | 1,641  | 711   | 2,270 | 89    | 56.23 | 24.36 | 77.79 | 96    |    |
|                               |                 | 1999   | 1,908  | 1,629 | 2,254 | 88    | 64.78 | 55.32 | 76.55 | 91    |    |
|                               |                 | 2000   | 1,587  | 737   | 2,259 | 89    | 53.45 | 24.82 | 76.07 | 96    |    |
|                               |                 | 2001   | 1,843  | 1,593 | 2,272 | 88    | 61.56 | 53.21 | 75.90 | 95    |    |
|                               |                 | 2002   | 1,589  | 868   | 2,306 | 91    | 52.62 | 28.74 | 76.39 | 96    |    |
|                               |                 | 2003   | 1,633  | 1,003 | 2,374 | 91    | 53.36 | 32.77 | 77.59 | 96    |    |
|                               |                 | 2004   | 1,695  | 1,148 | 2,471 | 91    | 54.89 | 37.16 | 80.01 | 96    |    |
|                               |                 | 2005   | 1,786  | 1,314 | 2,610 | 91    | 57.22 | 42.10 | 83.61 | 96    |    |
|                               | 2006            | 1,917  | 1,515  | 2,812 | 89    | 60.60 | 47.91 | 88.90 | 95    |       |    |
|                               | 2007            | 2,078  | 1,607  | 3,061 | 89    | 65.18 | 50.42 | 96.02 | 91    |       |    |
|                               |                 | Female | 1992   | 1,035 | 782   | 1,228 | 87    | 35.12 | 26.53 | 41.67 | 91 |
|                               |                 |        | 1993   | 925   | 476   | 1,239 | 88    | 31.03 | 15.98 | 41.59 | 93 |
|                               |                 |        | 1994   | 1,131 | 887   | 1,268 | 87    | 37.53 | 29.45 | 42.08 | 86 |
|                               |                 |        | 1995   | 1,022 | 489   | 1,333 | 87    | 33.63 | 16.08 | 43.88 | 89 |
|                               |                 |        | 1996   | 1,086 | 501   | 1,446 | 87    | 35.39 | 16.34 | 47.11 | 89 |
|                               |                 |        | 1997   | 1,154 | 515   | 1,565 | 87    | 37.34 | 16.67 | 50.65 | 88 |
|                               |                 |        | 1998   | 1,234 | 534   | 1,707 | 87    | 39.46 | 17.10 | 54.59 | 87 |
|                               |                 |        | 1999   | 1,560 | 1,332 | 1,843 | 85    | 49.55 | 42.31 | 58.55 | 78 |
|                               |                 |        | 2000   | 1,399 | 649   | 1,990 | 86    | 44.13 | 20.49 | 62.80 | 78 |
|                               |                 |        | 2001   | 1,725 | 1,491 | 2,127 | 82    | 54.06 | 46.73 | 66.66 | 68 |
|                               | 2002            |        | 1,551  | 847   | 2,251 | 84    | 48.37 | 26.42 | 70.23 | 73    |    |
|                               | 2003            |        | 1,623  | 996   | 2,359 | 83    | 50.17 | 30.81 | 72.95 | 73    |    |
|                               | 2004            | 1,667  | 1,128  | 2,429 | 82    | 51.01 | 34.54 | 74.36 | 71    |       |    |
|                               | 2005            | 1,678  | 1,235  | 2,452 | 83    | 50.91 | 37.46 | 74.38 | 68    |       |    |
|                               | 2006            | 1,654  | 1,308  | 2,427 | 83    | 49.54 | 39.16 | 72.67 | 72    |       |    |
|                               | 2007            | 1,572  | 1,216  | 2,316 | 84    | 46.75 | 36.16 | 68.87 | 77    |       |    |

| Metropolitan Statistical Area | PWID Population | Year        | Number | Min   | Max   | Rank  | Rate  | Min   | Max    | Rank  |    |
|-------------------------------|-----------------|-------------|--------|-------|-------|-------|-------|-------|--------|-------|----|
| Birmingham, AL                | Young (15-29)   | 1992        | 942    | 712   | 1,118 | 83    | 50.23 | 37.94 | 59.60  | 78    |    |
|                               |                 | 1993        | 794    | 409   | 1,064 | 85    | 42.23 | 21.74 | 56.59  | 80    |    |
|                               |                 | 1994        | 941    | 738   | 1,055 | 82    | 49.90 | 39.16 | 55.94  | 78    |    |
|                               |                 | 1995        | 844    | 403   | 1,101 | 83    | 44.58 | 21.32 | 58.16  | 82    |    |
|                               |                 | 1996        | 906    | 418   | 1,206 | 82    | 47.60 | 21.97 | 63.35  | 75    |    |
|                               |                 | 1997        | 984    | 439   | 1,334 | 83    | 51.52 | 23.00 | 69.87  | 71    |    |
|                               |                 | 1998        | 1,082  | 469   | 1,497 | 84    | 56.50 | 24.48 | 78.17  | 67    |    |
|                               |                 | 1999        | 1,409  | 1,204 | 1,665 | 78    | 73.77 | 63.00 | 87.17  | 63    |    |
|                               |                 | 2000        | 1,297  | 602   | 1,846 | 81    | 68.28 | 31.71 | 97.18  | 66    |    |
|                               |                 | 2001        | 1,632  | 1,410 | 2,012 | 78    | 86.79 | 75.02 | 107.01 | 59    |    |
|                               |                 | 2002        | 1,482  | 809   | 2,151 | 78    | 79.44 | 43.40 | 115.33 | 64    |    |
|                               |                 | 2003        | 1,548  | 951   | 2,251 | 79    | 82.16 | 50.46 | 119.47 | 62    |    |
|                               |                 | 2004        | 1,562  | 1,057 | 2,277 | 79    | 82.37 | 55.76 | 120.07 | 62    |    |
|                               |                 | 2005        | 1,513  | 1,113 | 2,211 | 82    | 79.23 | 58.30 | 115.77 | 67    |    |
|                               |                 | 2006        | 1,392  | 1,101 | 2,042 | 86    | 71.95 | 56.88 | 105.55 | 74    |    |
|                               | 2007            | 1,183       | 915    | 1,743 | 88    | 60.90 | 47.11 | 89.71 | 87     |       |    |
|                               |                 | Old (30-64) | 1992   | 2,240 | 1,693 | 2,658 | 91    | 59.10 | 44.65  | 70.12 | 94 |
|                               |                 |             | 1993   | 1,965 | 1,012 | 2,634 | 92    | 50.94 | 26.23  | 68.27 | 94 |
|                               |                 |             | 1994   | 2,299 | 1,804 | 2,577 | 91    | 58.60 | 45.99  | 65.71 | 92 |
|                               |                 |             | 1995   | 1,947 | 931   | 2,541 | 91    | 49.04 | 23.46  | 63.98 | 94 |
|                               |                 |             | 1996   | 1,913 | 883   | 2,546 | 91    | 47.56 | 21.95  | 63.30 | 95 |
|                               | 1997            |             | 1,860  | 831   | 2,523 | 91    | 45.82 | 20.46 | 62.15  | 95    |    |
|                               | 1998            |             | 1,811  | 785   | 2,506 | 91    | 43.88 | 19.01 | 60.70  | 96    |    |
|                               | 1999            | 2,087       | 1,782  | 2,466 | 88    | 49.91 | 42.62 | 58.97 | 94     |       |    |
|                               | 2000            | 1,715       | 797    | 2,441 | 93    | 40.46 | 18.79 | 57.58 | 96     |       |    |
|                               | 2001            | 1,963       | 1,696  | 2,420 | 89    | 45.59 | 39.41 | 56.22 | 94     |       |    |
|                               | 2002            | 1,667       | 911    | 2,420 | 93    | 38.24 | 20.89 | 55.51 | 96     |       |    |
|                               | 2003            | 1,691       | 1,039  | 2,459 | 92    | 38.34 | 23.55 | 55.75 | 96     |       |    |
|                               | 2004            | 1,740       | 1,178  | 2,536 | 92    | 39.02 | 26.41 | 56.88 | 96     |       |    |
|                               | 2005            | 1,827       | 1,344  | 2,669 | 91    | 40.52 | 29.82 | 59.21 | 93     |       |    |
|                               | 2006            | 1,968       | 1,556  | 2,887 | 88    | 43.09 | 34.07 | 63.21 | 91     |       |    |
|                               | 2007            | 2,156       | 1,668  | 3,176 | 87    | 46.78 | 36.19 | 68.92 | 84     |       |    |



| Metropolitan Statistical Area | PWID Population | Year   | Number             | Min    | Max     | Rank   | Rate   | Min    | Max    | Rank  |        |    |
|-------------------------------|-----------------|--------|--------------------|--------|---------|--------|--------|--------|--------|-------|--------|----|
| Boston, MA--NH                | Total           | 1992   | 25,960             | 24,404 | 28,135  | 10     | 67.99  | 63.91  | 73.68  | 82    |        |    |
|                               |                 | 1993   | 39,976             | 26,731 | 73,030  | 5      | 104.61 | 69.95  | 191.11 | 49    |        |    |
|                               |                 | 1994   | 32,072             | 29,292 | 34,665  | 7      | 83.55  | 76.31  | 90.31  | 67    |        |    |
|                               |                 | 1995   | 46,991             | 32,024 | 81,754  | 4      | 121.31 | 82.67  | 211.04 | 39    |        |    |
|                               |                 | 1996   | 50,239             | 34,840 | 85,951  | 3      | 128.63 | 89.20  | 220.06 | 36    |        |    |
|                               |                 | 1997   | 53,166             | 37,811 | 89,998  | 3      | 134.60 | 95.73  | 227.86 | 31    |        |    |
|                               |                 | 1998   | 55,841             | 40,878 | 94,005  | 3      | 139.98 | 102.47 | 235.65 | 28    |        |    |
|                               |                 | 1999   | 45,208             | 44,067 | 46,499  | 5      | 112.04 | 109.22 | 115.24 | 42    |        |    |
|                               |                 | 2000   | 61,357             | 44,208 | 102,495 | 3      | 150.43 | 108.39 | 251.29 | 19    |        |    |
|                               |                 | 2001   | 50,522             | 44,093 | 54,021  | 5      | 122.29 | 106.72 | 130.76 | 35    |        |    |
|                               |                 | 2002   | 66,127             | 45,676 | 102,646 | 3      | 158.75 | 109.65 | 246.42 | 13    |        |    |
|                               |                 | 2003   | 68,653             | 47,567 | 102,157 | 3      | 163.96 | 113.61 | 243.98 | 11    |        |    |
|                               |                 | 2004   | 70,763             | 48,197 | 101,084 | 3      | 168.30 | 114.63 | 240.41 | 9     |        |    |
|                               |                 | 2005   | 72,472             | 47,109 | 99,649  | 3      | 171.48 | 111.47 | 235.78 | 8     |        |    |
|                               |                 | 2006   | 74,336             | 45,953 | 98,329  | 2      | 174.75 | 108.03 | 231.16 | 8     |        |    |
|                               |                 | 2007   | 76,040             | 44,235 | 96,701  | 2      | 177.52 | 103.27 | 225.75 | 8     |        |    |
|                               |                 |        | Non-Hispanic White | 1992   | 16,743  | 15,740 | 18,146 | 6      | 49.86  | 46.87 | 54.04  | 75 |
|                               |                 |        |                    | 1993   | 25,741  | 17,212 | 47,025 | 3      | 77.00  | 51.48 | 140.66 | 49 |
|                               |                 |        |                    | 1994   | 20,515  | 18,736 | 22,173 | 5      | 61.39  | 56.07 | 66.35  | 61 |
|                               |                 |        |                    | 1995   | 29,740  | 20,268 | 51,741 | 2      | 88.70  | 60.45 | 154.31 | 43 |
| 1996                          | 31,364          |        |                    | 21,750 | 53,659  | 1      | 93.29  | 64.70  | 159.61 | 39    |        |    |
| 1997                          | 32,671          |        |                    | 23,236 | 55,305  | 1      | 96.68  | 68.76  | 163.67 | 34    |        |    |
| 1998                          | 33,740          |        |                    | 24,699 | 56,799  | 1      | 99.43  | 72.79  | 167.39 | 34    |        |    |
| 1999                          | 26,856          |        |                    | 26,178 | 27,623  | 2      | 78.75  | 76.77  | 81.00  | 51    |        |    |
| 2000                          | 35,878          |        |                    | 25,850 | 59,932  | 1      | 104.70 | 75.44  | 174.90 | 29    |        |    |
| 2001                          | 29,148          |        |                    | 25,439 | 31,167  | 2      | 84.49  | 73.74  | 90.35  | 42    |        |    |
| 2002                          | 37,784          |        |                    | 26,099 | 58,650  | 1      | 109.21 | 75.44  | 169.53 | 26    |        |    |
| 2003                          | 39,046          |        |                    | 27,054 | 58,101  | 1      | 112.83 | 78.18  | 167.89 | 24    |        |    |
| 2004                          | 40,311          |        |                    | 27,456 | 57,584  | 1      | 116.53 | 79.37  | 166.45 | 22    |        |    |
| 2005                          | 41,652          |        |                    | 27,075 | 57,271  | 1      | 120.33 | 78.22  | 165.45 | 19    |        |    |
| 2006                          | 43,443          | 26,856 | 57,466             | 1      | 125.27  | 77.44  | 165.70 | 18     |        |       |        |    |
| 2007                          | 45,553          | 26,500 | 57,931             | 1      | 131.02  | 76.22  | 166.62 | 16     |        |       |        |    |

| Metropolitan Statistical Area | PWID Population    | Year  | Number   | Min   | Max    | Rank   | Rate   | Min    | Max    | Rank   |        |    |
|-------------------------------|--------------------|-------|----------|-------|--------|--------|--------|--------|--------|--------|--------|----|
| Boston, MA--NH                | Non-Hispanic Black | 1992  | 4,376    | 4,114 | 4,742  | 24     | 255.83 | 240.50 | 277.26 | 59     |        |    |
|                               |                    | 1993  | 6,369    | 4,259 | 11,635 | 15     | 365.35 | 244.29 | 667.43 | 33     |        |    |
|                               |                    | 1994  | 4,836    | 4,417 | 5,227  | 23     | 271.12 | 247.61 | 293.04 | 48     |        |    |
|                               |                    | 1995  | 6,717    | 4,578 | 11,686 | 13     | 365.91 | 249.36 | 636.59 | 21     |        |    |
|                               |                    | 1996  | 6,822    | 4,731 | 11,671 | 13     | 362.08 | 251.10 | 619.47 | 19     |        |    |
|                               |                    | 1997  | 6,874    | 4,889 | 11,637 | 13     | 351.31 | 249.85 | 594.69 | 16     |        |    |
|                               |                    | 1998  | 6,897    | 5,049 | 11,610 | 14     | 342.27 | 250.56 | 576.20 | 14     |        |    |
|                               |                    | 1999  | 5,353    | 5,218 | 5,506  | 17     | 256.88 | 250.40 | 264.22 | 24     |        |    |
|                               |                    | 2000  | 6,994    | 5,039 | 11,683 | 12     | 327.07 | 235.65 | 546.36 | 11     |        |    |
|                               |                    | 2001  | 5,570    | 4,861 | 5,956  | 16     | 253.44 | 221.19 | 271.00 | 21     |        |    |
|                               |                    | 2002  | 7,088    | 4,896 | 11,003 | 12     | 314.81 | 217.45 | 488.66 | 12     |        |    |
|                               |                    | 2003  | 7,197    | 4,986 | 10,709 | 12     | 313.26 | 217.05 | 466.14 | 12     |        |    |
|                               |                    | 2004  | 7,303    | 4,974 | 10,432 | 12     | 312.86 | 213.09 | 446.92 | 13     |        |    |
|                               |                    | 2005  | 7,422    | 4,824 | 10,205 | 12     | 312.43 | 203.09 | 429.59 | 13     |        |    |
|                               |                    | 2006  | 7,627    | 4,715 | 10,089 | 13     | 314.50 | 194.42 | 416.01 | 14     |        |    |
|                               |                    | 2007  | 7,911    | 4,602 | 10,060 | 13     | 320.29 | 186.33 | 407.32 | 14     |        |    |
|                               |                    |       | Hispanic | 1992  | 3,606  | 3,390  | 3,908  | 22     | 211.47 | 198.79 | 229.18 | 29 |
|                               |                    |       |          | 1993  | 5,455  | 3,648  | 9,966  | 13     | 307.18 | 205.40 | 561.16 | 14 |
|                               |                    |       |          | 1994  | 4,372  | 3,993  | 4,725  | 16     | 236.60 | 216.09 | 255.73 | 22 |
|                               |                    |       |          | 1995  | 6,485  | 4,419  | 11,282 | 11     | 334.66 | 228.07 | 582.22 | 12 |
| 1996                          | 7,087              |       |          | 4,915 | 12,125 | 9      | 349.42 | 242.32 | 597.81 | 11     |        |    |
| 1997                          | 7,716              |       |          | 5,487 | 13,061 | 7      | 363.62 | 258.61 | 615.53 | 8      |        |    |
| 1998                          | 8,362              |       |          | 6,121 | 14,077 | 5      | 375.66 | 275.00 | 632.41 | 8      |        |    |
| 1999                          | 6,984              |       |          | 6,808 | 7,183  | 8      | 299.52 | 291.96 | 308.07 | 12     |        |    |
| 2000                          | 9,746              |       |          | 7,022 | 16,281 | 4      | 400.45 | 288.53 | 668.94 | 9      |        |    |
| 2001                          | 8,201              |       |          | 7,157 | 8,769  | 4      | 320.28 | 279.52 | 342.46 | 11     |        |    |
| 2002                          | 10,872             |       |          | 7,509 | 16,875 | 4      | 408.03 | 281.84 | 633.36 | 8      |        |    |
| 2003                          | 11,298             |       |          | 7,828 | 16,812 | 4      | 409.63 | 283.82 | 609.55 | 7      |        |    |
| 2004                          | 11,491             |       |          | 7,826 | 16,414 | 4      | 404.14 | 275.26 | 577.31 | 8      |        |    |
| 2005                          | 11,414             |       |          | 7,420 | 15,695 | 4      | 389.16 | 252.96 | 535.09 | 8      |        |    |
| 2006                          | 11,132             | 6,882 | 14,725   | 4     | 366.85 | 226.78 | 485.26 | 8      |        |        |        |    |
| 2007                          | 10,584             | 6,157 | 13,460   | 4     | 336.67 | 195.85 | 428.15 | 9      |        |        |        |    |

| Metropolitan Statistical Area | PWID Population | Year   | Number | Min    | Max    | Rank   | Rate   | Min    | Max    | Rank   |    |
|-------------------------------|-----------------|--------|--------|--------|--------|--------|--------|--------|--------|--------|----|
| Boston, MA--NH                | Male            | 1992   | 16,844 | 15,834 | 18,255 | 11     | 89.47  | 84.11  | 96.96  | 85     |    |
|                               |                 | 1993   | 25,989 | 17,378 | 47,478 | 5      | 137.93 | 92.23  | 251.98 | 48     |    |
|                               |                 | 1994   | 20,940 | 19,125 | 22,633 | 7      | 110.68 | 101.09 | 119.63 | 66     |    |
|                               |                 | 1995   | 30,868 | 21,037 | 53,703 | 4      | 161.72 | 110.21 | 281.35 | 38     |    |
|                               |                 | 1996   | 33,243 | 23,053 | 56,874 | 4      | 172.80 | 119.83 | 295.63 | 34     |    |
|                               |                 | 1997   | 35,461 | 25,220 | 60,027 | 3      | 182.37 | 129.70 | 308.72 | 31     |    |
|                               |                 | 1998   | 37,548 | 27,487 | 63,211 | 3      | 191.28 | 140.03 | 322.01 | 26     |    |
|                               |                 | 1999   | 30,636 | 29,863 | 31,510 | 4      | 154.31 | 150.42 | 158.72 | 37     |    |
|                               |                 | 2000   | 41,870 | 30,167 | 69,942 | 3      | 208.67 | 150.34 | 348.57 | 15     |    |
|                               |                 | 2001   | 34,674 | 30,261 | 37,076 | 4      | 170.45 | 148.76 | 182.25 | 32     |    |
|                               |                 | 2002   | 45,569 | 31,476 | 70,734 | 3      | 221.86 | 153.25 | 344.38 | 11     |    |
|                               |                 | 2003   | 47,404 | 32,845 | 70,538 | 3      | 229.40 | 158.94 | 341.35 | 11     |    |
|                               |                 | 2004   | 48,836 | 33,262 | 69,761 | 3      | 235.27 | 160.24 | 336.08 | 9      |    |
|                               |                 | 2005   | 49,841 | 32,398 | 68,531 | 3      | 238.68 | 155.15 | 328.18 | 9      |    |
|                               | 2006            | 50,766 | 31,382 | 67,151 | 3      | 241.27 | 149.15 | 319.14 | 9      |        |    |
|                               | 2007            | 51,352 | 29,873 | 65,305 | 2      | 242.16 | 140.87 | 307.96 | 9      |        |    |
|                               |                 | Female | 1992   | 8,898  | 8,365  | 9,644  | 15     | 45.97  | 43.21  | 49.82  | 81 |
|                               |                 |        | 1993   | 13,800 | 9,228  | 25,211 | 4      | 71.24  | 47.63  | 130.14 | 46 |
|                               |                 |        | 1994   | 11,092 | 10,130 | 11,989 | 7      | 56.98  | 52.04  | 61.59  | 66 |
|                               |                 |        | 1995   | 16,209 | 11,046 | 28,200 | 3      | 82.49  | 56.21  | 143.51 | 38 |
|                               |                 |        | 1996   | 17,220 | 11,942 | 29,461 | 3      | 86.88  | 60.25  | 148.64 | 36 |
|                               |                 |        | 1997   | 18,057 | 12,842 | 30,566 | 3      | 90.04  | 64.04  | 152.42 | 31 |
|                               |                 |        | 1998   | 18,752 | 13,727 | 31,568 | 3      | 92.55  | 67.75  | 155.80 | 29 |
|                               |                 |        | 1999   | 14,991 | 14,613 | 15,419 | 5      | 73.14  | 71.30  | 75.23  | 49 |
|                               |                 |        | 2000   | 20,080 | 14,468 | 33,543 | 3      | 96.91  | 69.82  | 161.88 | 21 |
|                               |                 |        | 2001   | 16,323 | 14,246 | 17,453 | 5      | 77.83  | 67.93  | 83.22  | 45 |
|                               | 2002            |        | 21,115 | 14,585 | 32,776 | 4      | 100.00 | 69.07  | 155.22 | 21     |    |
|                               | 2003            |        | 21,709 | 15,041 | 32,303 | 4      | 102.37 | 70.93  | 152.33 | 20     |    |
|                               | 2004            | 22,223 | 15,136 | 31,745 | 4      | 104.38 | 71.09  | 149.11 | 20     |        |    |
|                               | 2005            | 22,689 | 14,749 | 31,198 | 3      | 106.12 | 68.98  | 145.92 | 19     |        |    |
|                               | 2006            | 23,312 | 14,411 | 30,836 | 2      | 108.44 | 67.04  | 143.45 | 18     |        |    |
|                               | 2007            | 24,023 | 13,975 | 30,550 | 2      | 111.06 | 64.61  | 141.24 | 16     |        |    |

| Metropolitan Statistical Area | PWID Population | Year   | Number      | Min    | Max    | Rank   | Rate   | Min    | Max    | Rank  |        |    |
|-------------------------------|-----------------|--------|-------------|--------|--------|--------|--------|--------|--------|-------|--------|----|
| Boston, MA--NH                | Young (15-29)   | 1992   | 8,096       | 7,611  | 8,774  | 9      | 61.70  | 58.00  | 66.87  | 72    |        |    |
|                               |                 | 1993   | 12,900      | 8,626  | 23,566 | 3      | 100.91 | 67.47  | 184.34 | 45    |        |    |
|                               |                 | 1994   | 10,658      | 9,734  | 11,520 | 5      | 85.26  | 77.87  | 92.16  | 51    |        |    |
|                               |                 | 1995   | 16,021      | 10,919 | 27,874 | 3      | 130.02 | 88.61  | 226.21 | 25    |        |    |
|                               |                 | 1996   | 17,525      | 12,153 | 29,982 | 2      | 143.88 | 99.78  | 246.16 | 15    |        |    |
|                               |                 | 1997   | 18,939      | 13,469 | 32,059 | 1      | 156.32 | 111.17 | 264.61 | 12    |        |    |
|                               |                 | 1998   | 20,293      | 14,855 | 34,162 | 1      | 168.27 | 123.18 | 283.28 | 9     |        |    |
|                               |                 | 1999   | 16,756      | 16,334 | 17,235 | 3      | 139.76 | 136.23 | 143.75 | 20    |        |    |
|                               |                 | 2000   | 23,210      | 16,723 | 38,771 | 1      | 194.20 | 139.92 | 324.40 | 6     |        |    |
|                               |                 | 2001   | 19,530      | 17,045 | 20,883 | 3      | 162.83 | 142.11 | 174.11 | 16    |        |    |
|                               |                 | 2002   | 26,177      | 18,081 | 40,633 | 1      | 217.65 | 150.34 | 337.84 | 6     |        |    |
|                               |                 | 2003   | 27,904      | 19,334 | 41,521 | 1      | 230.68 | 159.83 | 343.25 | 6     |        |    |
|                               |                 | 2004   | 29,627      | 20,179 | 42,321 | 1      | 243.44 | 165.80 | 347.74 | 5     |        |    |
|                               |                 | 2005   | 31,369      | 20,391 | 43,132 | 1      | 255.46 | 166.06 | 351.26 | 5     |        |    |
|                               |                 | 2006   | 33,395      | 20,644 | 44,174 | 1      | 268.76 | 166.15 | 355.51 | 4     |        |    |
|                               |                 | 2007   | 35,597      | 20,708 | 45,270 | 1      | 283.70 | 165.04 | 360.79 | 3     |        |    |
|                               |                 |        | Old (30-64) | 1992   | 18,382 | 17,280 | 19,922 | 14     | 73.35  | 68.95 | 79.49  | 88 |
|                               |                 |        |             | 1993   | 27,542 | 18,416 | 50,315 | 5      | 108.30 | 72.42 | 197.86 | 51 |
|                               |                 |        |             | 1994   | 21,649 | 19,772 | 23,400 | 8      | 83.63  | 76.38 | 90.40  | 78 |
|                               |                 |        |             | 1995   | 31,271 | 21,311 | 54,404 | 4      | 118.38 | 80.68 | 205.95 | 43 |
| 1996                          | 33,121          |        |             | 22,969 | 56,665 | 4      | 123.23 | 85.45  | 210.82 | 41    |        |    |
| 1997                          | 34,835          |        |             | 24,775 | 58,969 | 4      | 127.22 | 90.48  | 215.36 | 39    |        |    |
| 1998                          | 36,415          |        |             | 26,657 | 61,302 | 3      | 130.84 | 95.78  | 220.26 | 36    |        |    |
| 1999                          | 29,327          |        |             | 28,587 | 30,165 | 6      | 103.41 | 100.80 | 106.37 | 53    |        |    |
| 2000                          | 39,502          |        |             | 28,461 | 65,986 | 3      | 136.99 | 98.70  | 228.84 | 28    |        |    |
| 2001                          | 32,140          |        |             | 28,050 | 34,366 | 5      | 109.62 | 95.67  | 117.21 | 43    |        |    |
| 2002                          | 41,300          |        |             | 28,528 | 64,108 | 3      | 139.40 | 96.29  | 216.38 | 24    |        |    |
| 2003                          | 41,718          |        |             | 28,905 | 62,077 | 4      | 140.11 | 97.08  | 208.49 | 20    |        |    |
| 2004                          | 41,327          |        |             | 28,148 | 59,035 | 4      | 138.33 | 94.21  | 197.60 | 19    |        |    |
| 2005                          | 40,006          |        |             | 26,005 | 55,008 | 4      | 133.43 | 86.73  | 183.46 | 18    |        |    |
| 2006                          | 37,923          | 23,443 | 50,163      | 4      | 125.94 | 77.85  | 166.59 | 19     |        |       |        |    |
| 2007                          | 34,799          | 20,244 | 44,255      | 4      | 114.89 | 66.84  | 146.11 | 22     |        |       |        |    |

| Metropolitan Statistical Area | PWID Population | Year  | Number             | Min   | Max   | Rank  | Rate  | Min   | Max    | Rank  |       |    |
|-------------------------------|-----------------|-------|--------------------|-------|-------|-------|-------|-------|--------|-------|-------|----|
| Buffalo--Niagara Falls, NY    | Total           | 1992  | 4,989              | 3,746 | 6,046 | 77    | 64.96 | 48.78 | 78.73  | 86    |       |    |
|                               |                 | 1993  | 5,974              | 4,073 | 8,084 | 67    | 77.96 | 53.16 | 105.51 | 69    |       |    |
|                               |                 | 1994  | 5,530              | 4,369 | 6,208 | 74    | 72.46 | 57.24 | 81.33  | 79    |       |    |
|                               |                 | 1995  | 6,385              | 4,620 | 8,226 | 66    | 84.05 | 60.82 | 108.28 | 63    |       |    |
|                               |                 | 1996  | 6,584              | 4,852 | 8,318 | 64    | 86.94 | 64.07 | 109.84 | 58    |       |    |
|                               |                 | 1997  | 6,696              | 4,775 | 8,391 | 64    | 88.82 | 63.34 | 111.30 | 56    |       |    |
|                               |                 | 1998  | 6,732              | 4,382 | 8,482 | 64    | 89.50 | 58.26 | 112.77 | 56    |       |    |
|                               |                 | 1999  | 6,091              | 3,773 | 7,890 | 68    | 81.21 | 50.31 | 105.20 | 61    |       |    |
|                               |                 | 2000  | 6,656              | 3,268 | 8,667 | 61    | 88.90 | 43.65 | 115.77 | 55    |       |    |
|                               |                 | 2001  | 5,972              | 2,999 | 8,096 | 70    | 79.68 | 40.01 | 108.02 | 63    |       |    |
|                               |                 | 2002  | 6,608              | 3,126 | 8,231 | 61    | 87.97 | 41.62 | 109.59 | 55    |       |    |
|                               |                 | 2003  | 6,730              | 3,646 | 8,166 | 58    | 89.31 | 48.38 | 108.35 | 53    |       |    |
|                               |                 | 2004  | 6,802              | 4,023 | 8,166 | 55    | 90.05 | 53.26 | 108.12 | 54    |       |    |
|                               |                 | 2005  | 6,827              | 4,319 | 8,149 | 55    | 90.39 | 57.18 | 107.88 | 53    |       |    |
|                               |                 | 2006  | 6,844              | 4,626 | 8,089 | 59    | 90.64 | 61.27 | 107.13 | 52    |       |    |
|                               |                 | 2007  | 6,841              | 4,896 | 8,036 | 60    | 90.55 | 64.81 | 106.38 | 52    |       |    |
|                               |                 |       | Non-Hispanic White | 1992  | 1,524 | 1,144 | 1,847 | 94    | 23.19  | 17.41 | 28.10 | 99 |
|                               |                 |       |                    | 1993  | 1,911 | 1,303 | 2,586 | 82    | 29.25  | 19.94 | 39.59 | 95 |
|                               |                 |       |                    | 1994  | 1,841 | 1,454 | 2,066 | 85    | 28.40  | 22.44 | 31.88 | 98 |
|                               |                 |       |                    | 1995  | 2,200 | 1,592 | 2,835 | 76    | 34.22  | 24.76 | 44.09 | 86 |
| 1996                          | 2,340           |       |                    | 1,724 | 2,956 | 76    | 36.65 | 27.01 | 46.30  | 84    |       |    |
| 1997                          | 2,448           |       |                    | 1,746 | 3,068 | 75    | 38.63 | 27.55 | 48.41  | 81    |       |    |
| 1998                          | 2,527           |       |                    | 1,645 | 3,184 | 76    | 40.10 | 26.10 | 50.53  | 81    |       |    |
| 1999                          | 2,347           |       |                    | 1,454 | 3,040 | 79    | 37.46 | 23.20 | 48.52  | 88    |       |    |
| 2000                          | 2,633           |       |                    | 1,293 | 3,429 | 77    | 42.22 | 20.73 | 54.98  | 77    |       |    |
| 2001                          | 2,428           |       |                    | 1,219 | 3,292 | 82    | 39.00 | 19.58 | 52.87  | 87    |       |    |
| 2002                          | 2,766           |       |                    | 1,309 | 3,445 | 74    | 44.42 | 21.02 | 55.34  | 78    |       |    |
| 2003                          | 2,907           |       |                    | 1,575 | 3,527 | 73    | 46.64 | 25.27 | 56.59  | 77    |       |    |
| 2004                          | 3,039           |       |                    | 1,798 | 3,649 | 73    | 48.74 | 28.83 | 58.52  | 75    |       |    |
| 2005                          | 3,165           |       |                    | 2,003 | 3,778 | 73    | 50.84 | 32.16 | 60.67  | 74    |       |    |
| 2006                          | 3,302           |       |                    | 2,232 | 3,902 | 73    | 53.16 | 35.93 | 62.82  | 75    |       |    |
| 2007                          | 3,443           | 2,464 | 4,045              | 71    | 55.53 | 39.74 | 65.23 | 73    |        |       |       |    |

| Metropolitan Statistical Area | PWID Population    | Year | Number   | Min   | Max    | Rank   | Rate   | Min    | Max    | Rank   |        |   |
|-------------------------------|--------------------|------|----------|-------|--------|--------|--------|--------|--------|--------|--------|---|
| Buffalo--Niagara Falls, NY    | Non-Hispanic Black | 1992 | 2,570    | 1,930 | 3,115  | 45     | 320.68 | 240.77 | 388.64 | 46     |        |   |
|                               |                    | 1993 | 2,976    | 2,029 | 4,027  | 33     | 366.77 | 250.07 | 496.34 | 32     |        |   |
|                               |                    | 1994 | 2,635    | 2,082 | 2,957  | 37     | 320.18 | 252.95 | 359.38 | 39     |        |   |
|                               |                    | 1995 | 2,879    | 2,083 | 3,709  | 31     | 347.11 | 251.18 | 447.20 | 25     |        |   |
|                               |                    | 1996 | 2,783    | 2,051 | 3,516  | 31     | 331.82 | 244.54 | 419.22 | 22     |        |   |
|                               |                    | 1997 | 2,631    | 1,876 | 3,297  | 32     | 311.84 | 222.39 | 390.78 | 21     |        |   |
|                               |                    | 1998 | 2,441    | 1,589 | 3,076  | 33     | 287.12 | 186.90 | 361.78 | 22     |        |   |
|                               |                    | 1999 | 2,029    | 1,257 | 2,628  | 41     | 237.25 | 146.97 | 307.33 | 34     |        |   |
|                               |                    | 2000 | 2,032    | 998   | 2,647  | 38     | 236.07 | 115.91 | 307.43 | 31     |        |   |
|                               |                    | 2001 | 1,674    | 841   | 2,270  | 51     | 192.97 | 96.90  | 261.61 | 43     |        |   |
|                               |                    | 2002 | 1,709    | 809   | 2,129  | 45     | 195.76 | 92.62  | 243.87 | 36     |        |   |
|                               |                    | 2003 | 1,622    | 878   | 1,967  | 47     | 184.11 | 99.74  | 223.38 | 37     |        |   |
|                               |                    | 2004 | 1,547    | 915   | 1,858  | 51     | 174.92 | 103.45 | 210.01 | 40     |        |   |
|                               |                    | 2005 | 1,493    | 945   | 1,782  | 49     | 168.07 | 106.32 | 200.59 | 41     |        |   |
|                               |                    | 2006 | 1,472    | 995   | 1,740  | 54     | 164.97 | 111.51 | 194.98 | 46     |        |   |
|                               |                    | 2007 | 1,487    | 1,064 | 1,747  | 55     | 165.70 | 118.59 | 194.65 | 46     |        |   |
|                               |                    |      | Hispanic | 1992  | 692    | 519    | 838    | 47     | 423.49 | 317.96 | 513.24 | 8 |
|                               |                    |      |          | 1993  | 865    | 590    | 1,171  | 41     | 509.20 | 347.18 | 689.10 | 5 |
|                               |                    |      |          | 1994  | 838    | 662    | 941    | 43     | 473.56 | 374.13 | 531.54 | 5 |
|                               |                    |      |          | 1995  | 1,012  | 733    | 1,304  | 40     | 554.30 | 401.10 | 714.13 | 5 |
| 1996                          | 1,089              |      |          | 803   | 1,376  | 40     | 573.62 | 422.73 | 724.70 | 5      |        |   |
| 1997                          | 1,152              |      |          | 822   | 1,444  | 40     | 591.57 | 421.87 | 741.33 | 5      |        |   |
| 1998                          | 1,198              |      |          | 780   | 1,510  | 40     | 598.66 | 389.69 | 754.32 | 4      |        |   |
| 1999                          | 1,115              |      |          | 691   | 1,444  | 43     | 542.77 | 336.23 | 703.07 | 5      |        |   |
| 2000                          | 1,243              |      |          | 610   | 1,619  | 42     | 589.97 | 289.67 | 768.31 | 4      |        |   |
| 2001                          | 1,128              |      |          | 567   | 1,530  | 43     | 521.82 | 262.02 | 707.41 | 5      |        |   |
| 2002                          | 1,251              |      |          | 592   | 1,558  | 43     | 564.44 | 267.06 | 703.15 | 4      |        |   |
| 2003                          | 1,262              |      |          | 684   | 1,531  | 43     | 555.19 | 300.77 | 673.61 | 4      |        |   |
| 2004                          | 1,249              |      |          | 739   | 1,499  | 44     | 538.63 | 318.57 | 646.69 | 5      |        |   |
| 2005                          | 1,211              |      |          | 766   | 1,445  | 45     | 513.70 | 324.98 | 613.11 | 4      |        |   |
| 2006                          | 1,156              | 782  | 1,367    | 47    | 480.46 | 324.76 | 567.85 | 5      |        |        |        |   |
| 2007                          | 1,084              | 776  | 1,274    | 47    | 438.04 | 313.50 | 514.57 | 4      |        |        |        |   |

| Metropolitan Statistical Area | PWID Population | Year   | Number | Min   | Max   | Rank   | Rate   | Min    | Max    | Rank  |    |
|-------------------------------|-----------------|--------|--------|-------|-------|--------|--------|--------|--------|-------|----|
| Buffalo--Niagara Falls, NY    | Male            | 1992   | 3,482  | 2,614 | 4,219 | 77     | 93.26  | 70.02  | 113.02 | 82    |    |
|                               |                 | 1993   | 4,148  | 2,828 | 5,614 | 64     | 111.26 | 75.86  | 150.57 | 63    |    |
|                               |                 | 1994   | 3,827  | 3,024 | 4,296 | 72     | 102.90 | 81.29  | 115.49 | 74    |    |
|                               |                 | 1995   | 4,410  | 3,191 | 5,681 | 60     | 119.03 | 86.13  | 153.35 | 55    |    |
|                               |                 | 1996   | 4,543  | 3,348 | 5,740 | 57     | 122.84 | 90.52  | 155.19 | 48    |    |
|                               |                 | 1997   | 4,622  | 3,296 | 5,792 | 57     | 125.45 | 89.47  | 157.21 | 48    |    |
|                               |                 | 1998   | 4,651  | 3,027 | 5,860 | 55     | 126.45 | 82.31  | 159.33 | 48    |    |
|                               |                 | 1999   | 4,215  | 2,611 | 5,460 | 63     | 114.88 | 71.17  | 148.82 | 59    |    |
|                               |                 | 2000   | 4,615  | 2,266 | 6,010 | 54     | 125.98 | 61.86  | 164.06 | 46    |    |
|                               |                 | 2001   | 4,151  | 2,084 | 5,627 | 65     | 113.05 | 56.77  | 153.26 | 57    |    |
|                               |                 | 2002   | 4,604  | 2,178 | 5,735 | 52     | 124.97 | 59.13  | 155.69 | 43    |    |
|                               |                 | 2003   | 4,700  | 2,546 | 5,703 | 51     | 126.95 | 68.77  | 154.02 | 42    |    |
|                               |                 | 2004   | 4,760  | 2,815 | 5,715 | 51     | 128.11 | 75.77  | 153.81 | 41    |    |
|                               |                 | 2005   | 4,786  | 3,028 | 5,712 | 51     | 128.60 | 81.35  | 153.48 | 41    |    |
|                               | 2006            | 4,802  | 3,246  | 5,676 | 53    | 129.01 | 87.20  | 152.47 | 39     |       |    |
|                               | 2007            | 4,801  | 3,436  | 5,640 | 53    | 128.77 | 92.16  | 151.27 | 38     |       |    |
|                               |                 | Female | 1992   | 1,468 | 1,102 | 1,779  | 79     | 37.19  | 27.93  | 45.08 | 88 |
|                               |                 |        | 1993   | 1,805 | 1,231 | 2,443  | 72     | 45.89  | 31.29  | 62.10 | 76 |
|                               |                 |        | 1994   | 1,706 | 1,348 | 1,915  | 77     | 43.60  | 34.45  | 48.94 | 84 |
|                               |                 |        | 1995   | 2,001 | 1,448 | 2,577  | 69     | 51.40  | 37.19  | 66.22 | 69 |
|                               |                 |        | 1996   | 2,085 | 1,537 | 2,634  | 68     | 53.82  | 39.66  | 67.99 | 65 |
|                               |                 |        | 1997   | 2,135 | 1,522 | 2,675  | 66     | 55.37  | 39.49  | 69.39 | 65 |
|                               |                 |        | 1998   | 2,152 | 1,401 | 2,712  | 67     | 55.99  | 36.45  | 70.55 | 65 |
|                               |                 |        | 1999   | 1,946 | 1,206 | 2,521  | 75     | 50.81  | 31.47  | 65.81 | 72 |
|                               |                 |        | 2000   | 2,120 | 1,041 | 2,761  | 71     | 55.45  | 27.22  | 72.21 | 65 |
|                               |                 |        | 2001   | 1,892 | 950   | 2,564  | 77     | 49.47  | 24.84  | 67.07 | 78 |
|                               | 2002            |        | 2,077  | 983   | 2,587 | 73     | 54.27  | 25.68  | 67.61  | 66    |    |
|                               | 2003            |        | 2,096  | 1,136 | 2,543 | 72     | 54.68  | 29.62  | 66.34  | 64    |    |
|                               | 2004            | 2,097  | 1,240  | 2,518 | 71    | 54.64  | 32.32  | 65.61  | 65     |       |    |
|                               | 2005            | 2,082  | 1,317  | 2,485 | 69    | 54.34  | 34.38  | 64.86  | 65     |       |    |
|                               | 2006            | 2,065  | 1,396  | 2,440 | 75    | 53.94  | 36.46  | 63.74  | 66     |       |    |
|                               | 2007            | 2,042  | 1,462  | 2,399 | 77    | 53.38  | 38.21  | 62.71  | 65     |       |    |

| Metropolitan Statistical Area | PWID Population | Year  | Number      | Min   | Max   | Rank  | Rate   | Min   | Max    | Rank  |        |    |
|-------------------------------|-----------------|-------|-------------|-------|-------|-------|--------|-------|--------|-------|--------|----|
| Buffalo--Niagara Falls, NY    | Young (15-29)   | 1992  | 765         | 575   | 928   | 89    | 30.67  | 23.02 | 37.16  | 98    |        |    |
|                               |                 | 1993  | 891         | 608   | 1,206 | 81    | 36.54  | 24.91 | 49.45  | 87    |        |    |
|                               |                 | 1994  | 824         | 651   | 925   | 86    | 34.64  | 27.36 | 38.88  | 95    |        |    |
|                               |                 | 1995  | 973         | 704   | 1,254 | 81    | 41.86  | 30.29 | 53.93  | 83    |        |    |
|                               |                 | 1996  | 1,049       | 773   | 1,326 | 81    | 45.99  | 33.89 | 58.11  | 81    |        |    |
|                               |                 | 1997  | 1,136       | 810   | 1,424 | 79    | 50.72  | 36.17 | 63.56  | 72    |        |    |
|                               |                 | 1998  | 1,235       | 804   | 1,556 | 77    | 55.79  | 36.32 | 70.30  | 69    |        |    |
|                               |                 | 1999  | 1,222       | 757   | 1,583 | 84    | 55.90  | 34.63 | 72.41  | 79    |        |    |
|                               |                 | 2000  | 1,473       | 723   | 1,918 | 78    | 68.04  | 33.41 | 88.61  | 67    |        |    |
|                               |                 | 2001  | 1,466       | 736   | 1,987 | 81    | 67.41  | 33.85 | 91.38  | 71    |        |    |
|                               |                 | 2002  | 1,802       | 853   | 2,245 | 71    | 81.92  | 38.76 | 102.06 | 63    |        |    |
|                               |                 | 2003  | 2,038       | 1,104 | 2,473 | 66    | 91.01  | 49.30 | 110.42 | 56    |        |    |
|                               |                 | 2004  | 2,278       | 1,347 | 2,735 | 63    | 100.01 | 59.15 | 120.08 | 52    |        |    |
|                               |                 | 2005  | 2,512       | 1,589 | 2,999 | 58    | 108.56 | 68.68 | 129.57 | 43    |        |    |
|                               |                 | 2006  | 2,745       | 1,855 | 3,244 | 53    | 116.67 | 78.86 | 137.89 | 35    |        |    |
|                               |                 | 2007  | 2,960       | 2,118 | 3,477 | 52    | 123.81 | 88.61 | 145.44 | 35    |        |    |
|                               |                 |       | Old (30-64) | 1992  | 4,254 | 3,194 | 5,155  | 69    | 82.06  | 61.61 | 99.45  | 80 |
|                               |                 |       |             | 1993  | 5,109 | 3,483 | 6,914  | 61    | 97.80  | 66.68 | 132.35 | 60 |
|                               |                 |       |             | 1994  | 4,730 | 3,737 | 5,309  | 66    | 90.02  | 71.12 | 101.04 | 72 |
|                               |                 |       |             | 1995  | 5,444 | 3,940 | 7,014  | 55    | 103.28 | 74.74 | 133.06 | 52 |
| 1996                          | 5,581           |       |             | 4,113 | 7,051 | 53    | 105.46 | 77.72 | 133.24 | 51    |        |    |
| 1997                          | 5,623           |       |             | 4,010 | 7,047 | 52    | 106.12 | 75.68 | 132.99 | 49    |        |    |
| 1998                          | 5,579           |       |             | 3,632 | 7,030 | 51    | 105.10 | 68.41 | 132.43 | 47    |        |    |
| 1999                          | 4,959           |       |             | 3,072 | 6,424 | 61    | 93.33  | 57.82 | 120.89 | 59    |        |    |
| 2000                          | 5,295           |       |             | 2,600 | 6,896 | 55    | 99.50  | 48.85 | 129.58 | 49    |        |    |
| 2001                          | 4,614           |       |             | 2,317 | 6,255 | 64    | 86.72  | 43.54 | 117.56 | 58    |        |    |
| 2002                          | 4,920           |       |             | 2,328 | 6,129 | 56    | 92.64  | 43.83 | 115.40 | 51    |        |    |
| 2003                          | 4,787           |       |             | 2,593 | 5,808 | 57    | 90.38  | 48.96 | 109.66 | 49    |        |    |
| 2004                          | 4,574           |       |             | 2,705 | 5,492 | 57    | 86.70  | 51.28 | 104.09 | 51    |        |    |
| 2005                          | 4,287           |       |             | 2,712 | 5,117 | 61    | 81.82  | 51.76 | 97.66  | 53    |        |    |
| 2006                          | 3,954           | 2,673 | 4,673       | 64    | 76.07 | 51.42 | 89.90  | 54    |        |       |        |    |
| 2007                          | 3,576           | 2,559 | 4,201       | 72    | 69.26 | 49.57 | 81.36  | 58    |        |       |        |    |



| Metropolitan Statistical Area    | PWID Population | Year  | Number             | Min   | Max   | Rank  | Rate   | Min   | Max    | Rank  |       |    |
|----------------------------------|-----------------|-------|--------------------|-------|-------|-------|--------|-------|--------|-------|-------|----|
| Charleston--North Charleston, SC | Total           | 1992  | 2,513              | 1,914 | 3,008 | 95    | 69.94  | 53.28 | 83.72  | 81    |       |    |
|                                  |                 | 1993  | 2,028              | 964   | 2,852 | 96    | 56.46  | 26.85 | 79.41  | 85    |       |    |
|                                  |                 | 1994  | 2,246              | 1,633 | 2,696 | 96    | 62.99  | 45.80 | 75.59  | 84    |       |    |
|                                  |                 | 1995  | 1,837              | 1,037 | 2,542 | 98    | 52.26  | 29.49 | 72.29  | 89    |       |    |
|                                  |                 | 1996  | 1,758              | 1,065 | 2,419 | 98    | 50.55  | 30.61 | 69.54  | 92    |       |    |
|                                  |                 | 1997  | 1,763              | 1,117 | 2,490 | 98    | 49.63  | 31.45 | 70.10  | 92    |       |    |
|                                  |                 | 1998  | 1,794              | 1,169 | 2,518 | 99    | 49.54  | 32.30 | 69.53  | 91    |       |    |
|                                  |                 | 1999  | 2,022              | 1,489 | 2,503 | 97    | 54.39  | 40.04 | 67.33  | 90    |       |    |
|                                  |                 | 2000  | 1,840              | 1,281 | 2,416 | 99    | 48.95  | 34.07 | 64.26  | 93    |       |    |
|                                  |                 | 2001  | 2,036              | 1,810 | 2,330 | 98    | 53.44  | 47.51 | 61.14  | 92    |       |    |
|                                  |                 | 2002  | 1,889              | 1,385 | 2,350 | 99    | 48.69  | 35.70 | 60.56  | 94    |       |    |
|                                  |                 | 2003  | 1,976              | 1,444 | 2,591 | 99    | 49.99  | 36.52 | 65.53  | 94    |       |    |
|                                  |                 | 2004  | 2,117              | 1,511 | 3,042 | 99    | 52.18  | 37.23 | 74.97  | 93    |       |    |
|                                  |                 | 2005  | 2,249              | 1,568 | 3,494 | 97    | 54.40  | 37.92 | 84.50  | 89    |       |    |
|                                  |                 | 2006  | 2,408              | 1,642 | 4,007 | 96    | 56.63  | 38.61 | 94.24  | 83    |       |    |
|                                  |                 | 2007  | 2,558              | 1,711 | 4,521 | 96    | 58.94  | 39.43 | 104.17 | 79    |       |    |
|                                  |                 |       | Non-Hispanic White | 1992  | 1,240 | 944   | 1,484  | 97    | 50.21  | 38.24 | 60.10 | 74 |
|                                  |                 |       |                    | 1993  | 978   | 465   | 1,375  | 98    | 39.85  | 18.95 | 56.05 | 83 |
|                                  |                 |       |                    | 1994  | 1,073 | 780   | 1,288  | 98    | 44.24  | 32.17 | 53.09 | 82 |
|                                  |                 |       |                    | 1995  | 881   | 497   | 1,219  | 98    | 37.10  | 20.93 | 51.32 | 84 |
| 1996                             | 855             |       |                    | 518   | 1,176 | 98    | 36.57  | 22.14 | 50.30  | 85    |       |    |
| 1997                             | 876             |       |                    | 555   | 1,237 | 99    | 36.88  | 23.37 | 52.09  | 82    |       |    |
| 1998                             | 916             |       |                    | 597   | 1,285 | 99    | 37.95  | 24.74 | 53.26  | 82    |       |    |
| 1999                             | 1,065           |       |                    | 784   | 1,318 | 99    | 43.11  | 31.74 | 53.37  | 79    |       |    |
| 2000                             | 1,002           |       |                    | 697   | 1,315 | 98    | 40.27  | 28.03 | 52.87  | 80    |       |    |
| 2001                             | 1,145           |       |                    | 1,018 | 1,311 | 98    | 45.49  | 40.45 | 52.05  | 79    |       |    |
| 2002                             | 1,097           |       |                    | 804   | 1,364 | 98    | 42.75  | 31.35 | 53.17  | 79    |       |    |
| 2003                             | 1,180           |       |                    | 862   | 1,547 | 97    | 45.13  | 32.97 | 59.17  | 80    |       |    |
| 2004                             | 1,296           |       |                    | 925   | 1,862 | 97    | 48.25  | 34.43 | 69.33  | 77    |       |    |
| 2005                             | 1,404           |       |                    | 979   | 2,181 | 97    | 51.38  | 35.82 | 79.81  | 73    |       |    |
| 2006                             | 1,525           |       |                    | 1,040 | 2,537 | 97    | 54.21  | 36.96 | 90.21  | 72    |       |    |
| 2007                             | 1,632           | 1,092 | 2,885              | 94    | 56.85 | 38.02 | 100.46 | 69    |        |       |       |    |

| Metropolitan Statistical Area    | PWID Population    | Year | Number   | Min  | Max   | Rank  | Rate  | Min   | Max    | Rank  |       |    |
|----------------------------------|--------------------|------|----------|------|-------|-------|-------|-------|--------|-------|-------|----|
| Charleston--North Charleston, SC | Non-Hispanic Black | 1992 | 959      | 730  | 1,148 | 81    | 95.13 | 72.47 | 113.88 | 97    |       |    |
|                                  |                    | 1993 | 850      | 404  | 1,196 | 83    | 83.40 | 39.66 | 117.31 | 98    |       |    |
|                                  |                    | 1994 | 995      | 724  | 1,194 | 75    | 97.58 | 70.95 | 117.10 | 96    |       |    |
|                                  |                    | 1995 | 834      | 470  | 1,153 | 77    | 82.15 | 46.35 | 113.64 | 95    |       |    |
|                                  |                    | 1996 | 797      | 483  | 1,096 | 76    | 78.92 | 47.79 | 108.56 | 95    |       |    |
|                                  |                    | 1997 | 781      | 495  | 1,103 | 75    | 75.54 | 47.87 | 106.69 | 95    |       |    |
|                                  |                    | 1998 | 762      | 497  | 1,070 | 76    | 72.36 | 47.17 | 101.55 | 94    |       |    |
|                                  |                    | 1999 | 810      | 596  | 1,003 | 70    | 75.07 | 55.28 | 92.94  | 93    |       |    |
|                                  |                    | 2000 | 686      | 477  | 900   | 75    | 62.54 | 43.53 | 82.11  | 94    |       |    |
|                                  |                    | 2001 | 698      | 620  | 798   | 73    | 62.83 | 55.86 | 71.88  | 93    |       |    |
|                                  |                    | 2002 | 592      | 434  | 736   | 77    | 52.47 | 38.48 | 65.26  | 94    |       |    |
|                                  |                    | 2003 | 565      | 413  | 740   | 78    | 49.31 | 36.02 | 64.64  | 95    |       |    |
|                                  |                    | 2004 | 555      | 396  | 797   | 79    | 47.51 | 33.90 | 68.26  | 97    |       |    |
|                                  |                    | 2005 | 547      | 381  | 849   | 79    | 45.90 | 31.99 | 71.29  | 97    |       |    |
|                                  |                    | 2006 | 554      | 378  | 921   | 79    | 45.53 | 31.05 | 75.77  | 96    |       |    |
|                                  |                    | 2007 | 572      | 382  | 1,010 | 78    | 46.30 | 30.97 | 81.82  | 96    |       |    |
|                                  |                    |      | Hispanic | 1992 | 24    | 18    | 29    | 93    | 41.67  | 31.74 | 49.88 | 89 |
|                                  |                    |      |          | 1993 | 20    | 9     | 28    | 93    | 33.88  | 16.11 | 47.66 | 91 |
|                                  |                    |      |          | 1994 | 23    | 16    | 27    | 95    | 38.32  | 27.86 | 45.98 | 91 |
|                                  |                    |      |          | 1995 | 19    | 11    | 27    | 96    | 30.66  | 17.30 | 42.41 | 92 |
| 1996                             | 19                 |      |          | 12   | 27    | 96    | 29.53 | 17.88 | 40.62  | 91    |       |    |
| 1997                             | 20                 |      |          | 13   | 29    | 96    | 27.78 | 17.60 | 39.23  | 89    |       |    |
| 1998                             | 22                 |      |          | 14   | 31    | 95    | 27.20 | 17.73 | 38.17  | 89    |       |    |
| 1999                             | 26                 |      |          | 19   | 33    | 94    | 29.30 | 21.58 | 36.28  | 88    |       |    |
| 2000                             | 26                 |      |          | 18   | 34    | 94    | 26.89 | 18.72 | 35.30  | 86    |       |    |
| 2001                             | 30                 |      |          | 27   | 35    | 94    | 30.55 | 27.17 | 34.96  | 84    |       |    |
| 2002                             | 30                 |      |          | 22   | 37    | 94    | 29.18 | 21.40 | 36.30  | 83    |       |    |
| 2003                             | 33                 |      |          | 24   | 44    | 94    | 31.29 | 22.86 | 41.02  | 79    |       |    |
| 2004                             | 38                 |      |          | 27   | 54    | 94    | 33.13 | 23.64 | 47.61  | 77    |       |    |
| 2005                             | 42                 |      |          | 29   | 66    | 94    | 35.72 | 24.90 | 55.48  | 72    |       |    |
| 2006                             | 48                 | 32   | 79       | 93   | 37.30 | 25.43 | 62.06 | 73    |        |       |       |    |
| 2007                             | 53                 | 35   | 94       | 91   | 39.33 | 26.31 | 69.51 | 71    |        |       |       |    |

| Metropolitan Statistical Area    | PWID Population | Year   | Number | Min   | Max   | Rank  | Rate  | Min    | Max    | Rank  |    |
|----------------------------------|-----------------|--------|--------|-------|-------|-------|-------|--------|--------|-------|----|
| Charleston--North Charleston, SC | Male            | 1992   | 1,773  | 1,351 | 2,123 | 93    | 98.13 | 74.75  | 117.46 | 81    |    |
|                                  |                 | 1993   | 1,454  | 692   | 2,046 | 95    | 81.62 | 38.81  | 114.80 | 85    |    |
|                                  |                 | 1994   | 1,629  | 1,184 | 1,955 | 95    | 92.35 | 67.15  | 110.83 | 83    |    |
|                                  |                 | 1995   | 1,340  | 756   | 1,854 | 95    | 77.25 | 43.59  | 106.86 | 85    |    |
|                                  |                 | 1996   | 1,285  | 778   | 1,768 | 96    | 74.93 | 45.37  | 103.07 | 84    |    |
|                                  |                 | 1997   | 1,286  | 815   | 1,817 | 96    | 73.52 | 46.59  | 103.84 | 85    |    |
|                                  |                 | 1998   | 1,302  | 849   | 1,828 | 96    | 72.76 | 47.43  | 102.11 | 83    |    |
|                                  |                 | 1999   | 1,456  | 1,072 | 1,803 | 94    | 78.94 | 58.12  | 97.73  | 81    |    |
|                                  |                 | 2000   | 1,312  | 913   | 1,722 | 95    | 70.31 | 48.94  | 92.30  | 81    |    |
|                                  |                 | 2001   | 1,433  | 1,274 | 1,639 | 95    | 75.91 | 67.49  | 86.85  | 82    |    |
|                                  |                 | 2002   | 1,310  | 960   | 1,629 | 97    | 68.22 | 50.03  | 84.85  | 83    |    |
|                                  |                 | 2003   | 1,348  | 984   | 1,767 | 98    | 69.17 | 50.53  | 90.68  | 83    |    |
|                                  |                 | 2004   | 1,418  | 1,012 | 2,037 | 98    | 70.82 | 50.53  | 101.76 | 82    |    |
|                                  |                 | 2005   | 1,479  | 1,031 | 2,297 | 97    | 72.80 | 50.74  | 113.07 | 79    |    |
|                                  | 2006            | 1,553  | 1,059  | 2,585 | 95    | 74.06 | 50.50 | 123.23 | 78     |       |    |
|                                  | 2007            | 1,620  | 1,083  | 2,863 | 96    | 75.74 | 50.66 | 133.85 | 75     |       |    |
|                                  |                 | Female | 1992   | 720   | 548   | 862   | 95    | 40.31  | 30.70  | 48.25 | 85 |
|                                  |                 |        | 1993   | 567   | 269   | 797   | 97    | 31.32  | 14.89  | 44.06 | 91 |
|                                  |                 |        | 1994   | 621   | 452   | 746   | 96    | 34.47  | 25.06  | 41.36 | 92 |
|                                  |                 |        | 1995   | 509   | 287   | 704   | 100   | 28.59  | 16.13  | 39.55 | 94 |
|                                  |                 |        | 1996   | 493   | 299   | 679   | 100   | 27.97  | 16.94  | 38.48 | 95 |
|                                  |                 |        | 1997   | 505   | 320   | 713   | 100   | 28.00  | 17.75  | 39.55 | 95 |
|                                  |                 |        | 1998   | 528   | 344   | 740   | 99    | 28.81  | 18.78  | 40.43 | 95 |
|                                  |                 |        | 1999   | 613   | 451   | 759   | 99    | 32.74  | 24.10  | 40.53 | 92 |
|                                  |                 |        | 2000   | 577   | 401   | 757   | 99    | 30.44  | 21.18  | 39.95 | 95 |
|                                  |                 |        | 2001   | 659   | 586   | 754   | 99    | 34.27  | 30.47  | 39.21 | 93 |
|                                  | 2002            |        | 631    | 462   | 784   | 99    | 32.16 | 23.58  | 39.99  | 95    |    |
|                                  | 2003            |        | 678    | 495   | 888   | 98    | 33.79 | 24.68  | 44.29  | 95    |    |
|                                  | 2004            | 742    | 529    | 1,066 | 98    | 36.10 | 25.75 | 51.87  | 94     |       |    |
|                                  | 2005            | 800    | 558    | 1,243 | 97    | 38.04 | 26.52 | 59.09  | 91     |       |    |
|                                  | 2006            | 863    | 588    | 1,435 | 97    | 40.03 | 27.29 | 66.60  | 87     |       |    |
|                                  | 2007            | 913    | 611    | 1,614 | 96    | 41.48 | 27.75 | 73.31  | 84     |       |    |

| Metropolitan Statistical Area    | PWID Population | Year        | Number | Min   | Max   | Rank  | Rate  | Min    | Max    | Rank   |    |
|----------------------------------|-----------------|-------------|--------|-------|-------|-------|-------|--------|--------|--------|----|
| Charleston--North Charleston, SC | Young (15-29)   | 1992        | 678    | 516   | 811   | 93    | 49.29 | 37.55  | 59.00  | 80     |    |
|                                  |                 | 1993        | 475    | 226   | 668   | 97    | 35.80 | 17.02  | 50.36  | 88     |    |
|                                  |                 | 1994        | 481    | 350   | 577   | 97    | 37.36 | 27.17  | 44.84  | 91     |    |
|                                  |                 | 1995        | 378    | 213   | 523   | 97    | 30.29 | 17.09  | 41.90  | 93     |    |
|                                  |                 | 1996        | 363    | 220   | 499   | 99    | 29.69 | 17.98  | 40.85  | 93     |    |
|                                  |                 | 1997        | 378    | 240   | 534   | 99    | 30.68 | 19.45  | 43.34  | 92     |    |
|                                  |                 | 1998        | 411    | 268   | 576   | 97    | 32.93 | 21.46  | 46.21  | 93     |    |
|                                  |                 | 1999        | 502    | 370   | 622   | 97    | 39.66 | 29.20  | 49.09  | 93     |    |
|                                  |                 | 2000        | 501    | 348   | 657   | 99    | 39.70 | 27.63  | 52.12  | 89     |    |
|                                  |                 | 2001        | 607    | 539   | 694   | 98    | 48.26 | 42.91  | 55.21  | 86     |    |
|                                  |                 | 2002        | 612    | 449   | 761   | 99    | 48.30 | 35.42  | 60.07  | 87     |    |
|                                  |                 | 2003        | 687    | 502   | 901   | 99    | 53.73 | 39.25  | 70.44  | 85     |    |
|                                  |                 | 2004        | 775    | 553   | 1,114 | 98    | 58.85 | 41.99  | 84.56  | 85     |    |
|                                  |                 | 2005        | 847    | 590   | 1,316 | 98    | 63.63 | 44.35  | 98.82  | 81     |    |
|                                  |                 | 2006        | 906    | 618   | 1,508 | 98    | 65.59 | 44.72  | 109.13 | 84     |    |
|                                  | 2007            | 929         | 621    | 1,641 | 97    | 66.34 | 44.38 | 117.24 | 81     |        |    |
|                                  |                 | Old (30-64) | 1992   | 1,854 | 1,412 | 2,219 | 95    | 83.57  | 63.66  | 100.03 | 77 |
|                                  |                 |             | 1993   | 1,571 | 747   | 2,209 | 96    | 69.33  | 32.97  | 97.51  | 85 |
|                                  |                 |             | 1994   | 1,790 | 1,302 | 2,148 | 95    | 78.56  | 57.13  | 94.28  | 83 |
|                                  |                 |             | 1995   | 1,486 | 838   | 2,055 | 96    | 65.51  | 36.96  | 90.62  | 84 |
|                                  | 1996            |             | 1,427  | 864   | 1,963 | 96    | 63.28 | 38.31  | 87.04  | 85     |    |
|                                  | 1997            |             | 1,424  | 903   | 2,012 | 96    | 61.41 | 38.92  | 86.74  | 85     |    |
|                                  | 1998            |             | 1,432  | 933   | 2,009 | 97    | 60.30 | 39.31  | 84.63  | 83     |    |
|                                  | 1999            |             | 1,582  | 1,165 | 1,958 | 97    | 64.54 | 47.52  | 79.90  | 83     |    |
|                                  | 2000            |             | 1,402  | 976   | 1,840 | 98    | 56.09 | 39.04  | 73.63  | 85     |    |
|                                  | 2001            |             | 1,500  | 1,333 | 1,716 | 97    | 58.73 | 52.22  | 67.20  | 82     |    |
|                                  | 2002            | 1,338       | 981    | 1,664 | 98    | 51.21 | 37.55 | 63.69  | 88     |        |    |
|                                  | 2003            | 1,341       | 980    | 1,758 | 98    | 50.13 | 36.63 | 65.72  | 88     |        |    |
|                                  | 2004            | 1,375       | 981    | 1,975 | 98    | 50.16 | 35.79 | 72.07  | 85     |        |    |
|                                  | 2005            | 1,401       | 976    | 2,175 | 95    | 49.96 | 34.82 | 77.59  | 84     |        |    |
|                                  | 2006            | 1,447       | 987    | 2,408 | 95    | 50.41 | 34.37 | 83.88  | 81     |        |    |
|                                  | 2007            | 1,500       | 1,003  | 2,650 | 95    | 51.00 | 34.11 | 90.13  | 76     |        |    |

| Metropolitan Statistical Area          | PWID Population | Year  | Number             | Min   | Max    | Rank  | Rate   | Min   | Max    | Rank  |       |    |
|----------------------------------------|-----------------|-------|--------------------|-------|--------|-------|--------|-------|--------|-------|-------|----|
| Charlotte--Gastonia--Rock Hill, NC--SC | Total           | 1992  | 7,224              | 6,344 | 8,230  | 59    | 87.10  | 76.48 | 99.22  | 65    |       |    |
|                                        |                 | 1993  | 6,154              | 3,388 | 8,171  | 64    | 72.64  | 39.99 | 96.46  | 73    |       |    |
|                                        |                 | 1994  | 6,954              | 6,195 | 8,155  | 61    | 80.11  | 71.36 | 93.95  | 73    |       |    |
|                                        |                 | 1995  | 5,967              | 3,311 | 8,167  | 69    | 66.81  | 37.07 | 91.44  | 77    |       |    |
|                                        |                 | 1996  | 5,888              | 3,266 | 8,210  | 69    | 64.02  | 35.51 | 89.27  | 78    |       |    |
|                                        |                 | 1997  | 5,806              | 3,220 | 8,253  | 68    | 61.27  | 33.98 | 87.09  | 80    |       |    |
|                                        |                 | 1998  | 5,774              | 3,166 | 8,456  | 68    | 59.17  | 32.44 | 86.66  | 81    |       |    |
|                                        |                 | 1999  | 6,614              | 5,170 | 8,664  | 65    | 65.82  | 51.45 | 86.22  | 77    |       |    |
|                                        |                 | 2000  | 5,780              | 2,908 | 9,222  | 67    | 56.00  | 28.18 | 89.35  | 82    |       |    |
|                                        |                 | 2001  | 6,845              | 4,869 | 9,777  | 64    | 64.75  | 46.06 | 92.49  | 75    |       |    |
|                                        |                 | 2002  | 6,014              | 2,652 | 10,698 | 66    | 55.69  | 24.56 | 99.05  | 83    |       |    |
|                                        |                 | 2003  | 6,193              | 2,505 | 11,630 | 65    | 56.24  | 22.75 | 105.62 | 82    |       |    |
|                                        |                 | 2004  | 6,408              | 2,377 | 12,655 | 64    | 56.92  | 21.12 | 112.41 | 81    |       |    |
|                                        |                 | 2005  | 6,695              | 2,279 | 13,841 | 59    | 57.66  | 19.62 | 119.20 | 80    |       |    |
|                                        |                 | 2006  | 7,069              | 2,189 | 15,259 | 55    | 58.56  | 18.13 | 126.42 | 79    |       |    |
|                                        |                 | 2007  | 7,458              | 2,107 | 16,747 | 54    | 59.51  | 16.81 | 133.64 | 78    |       |    |
|                                        |                 |       | Non-Hispanic White | 1992  | 3,675  | 3,227 | 4,186  | 62    | 57.10  | 50.14 | 65.05 | 68 |
|                                        |                 |       |                    | 1993  | 3,130  | 1,723 | 4,156  | 66    | 47.94  | 26.39 | 63.65 | 72 |
|                                        |                 |       |                    | 1994  | 3,545  | 3,158 | 4,157  | 63    | 53.40  | 47.57 | 62.62 | 69 |
|                                        |                 |       |                    | 1995  | 3,055  | 1,695 | 4,181  | 66    | 45.10  | 25.03 | 61.73 | 75 |
| 1996                                   | 3,032           |       |                    | 1,681 | 4,227  | 66    | 43.89  | 24.34 | 61.20  | 76    |       |    |
| 1997                                   | 3,010           |       |                    | 1,669 | 4,279  | 69    | 42.76  | 23.71 | 60.78  | 79    |       |    |
| 1998                                   | 3,016           |       |                    | 1,654 | 4,417  | 69    | 42.08  | 23.07 | 61.63  | 77    |       |    |
| 1999                                   | 3,483           |       |                    | 2,722 | 4,562  | 66    | 47.77  | 37.34 | 62.58  | 73    |       |    |
| 2000                                   | 3,068           |       |                    | 1,544 | 4,895  | 69    | 41.48  | 20.87 | 66.19  | 78    |       |    |
| 2001                                   | 3,661           |       |                    | 2,604 | 5,230  | 62    | 48.78  | 34.70 | 69.67  | 74    |       |    |
| 2002                                   | 3,240           |       |                    | 1,429 | 5,762  | 67    | 42.61  | 18.79 | 75.80  | 82    |       |    |
| 2003                                   | 3,356           |       |                    | 1,358 | 6,303  | 68    | 43.64  | 17.65 | 81.96  | 82    |       |    |
| 2004                                   | 3,490           |       |                    | 1,295 | 6,892  | 65    | 44.76  | 16.60 | 88.38  | 83    |       |    |
| 2005                                   | 3,658           |       |                    | 1,245 | 7,562  | 65    | 45.86  | 15.61 | 94.82  | 82    |       |    |
| 2006                                   | 3,868           | 1,198 | 8,349              | 60    | 47.08  | 14.58 | 101.63 | 82    |        |       |       |    |
| 2007                                   | 4,077           | 1,152 | 9,157              | 60    | 48.23  | 13.63 | 108.30 | 82    |        |       |       |    |

| Metropolitan Statistical Area          | PWID Population    | Year | Number   | Min   | Max   | Rank | Rate   | Min    | Max    | Rank  |       |     |
|----------------------------------------|--------------------|------|----------|-------|-------|------|--------|--------|--------|-------|-------|-----|
| Charlotte--Gastonia--Rock Hill, NC--SC | Non-Hispanic Black | 1992 | 3,078    | 2,703 | 3,506 | 36   | 190.00 | 166.85 | 216.46 | 80    |       |     |
|                                        |                    | 1993 | 2,712    | 1,493 | 3,601 | 37   | 162.69 | 89.57  | 216.02 | 83    |       |     |
|                                        |                    | 1994 | 3,101    | 2,762 | 3,636 | 31   | 180.21 | 160.53 | 211.33 | 75    |       |     |
|                                        |                    | 1995 | 2,645    | 1,468 | 3,620 | 35   | 148.41 | 82.35  | 203.12 | 79    |       |     |
|                                        |                    | 1996 | 2,559    | 1,419 | 3,567 | 34   | 138.81 | 76.99  | 193.54 | 79    |       |     |
|                                        |                    | 1997 | 2,448    | 1,357 | 3,479 | 34   | 128.33 | 71.16  | 182.41 | 80    |       |     |
|                                        |                    | 1998 | 2,346    | 1,286 | 3,435 | 34   | 119.27 | 65.40  | 174.67 | 79    |       |     |
|                                        |                    | 1999 | 2,582    | 2,018 | 3,382 | 33   | 127.53 | 99.69  | 167.06 | 79    |       |     |
|                                        |                    | 2000 | 2,171    | 1,092 | 3,464 | 34   | 104.41 | 52.54  | 166.60 | 80    |       |     |
|                                        |                    | 2001 | 2,491    | 1,772 | 3,558 | 30   | 115.66 | 82.28  | 165.22 | 78    |       |     |
|                                        |                    | 2002 | 2,145    | 946   | 3,815 | 33   | 96.35  | 42.49  | 171.39 | 80    |       |     |
|                                        |                    | 2003 | 2,201    | 890   | 4,134 | 32   | 95.93  | 38.80  | 180.16 | 79    |       |     |
|                                        |                    | 2004 | 2,320    | 861   | 4,582 | 29   | 97.73  | 36.25  | 193.00 | 74    |       |     |
|                                        |                    | 2005 | 2,532    | 862   | 5,234 | 27   | 102.26 | 34.80  | 211.40 | 72    |       |     |
|                                        |                    | 2006 | 2,867    | 888   | 6,188 | 25   | 110.18 | 34.12  | 237.85 | 67    |       |     |
|                                        |                    | 2007 | 3,324    | 939   | 7,466 | 23   | 122.14 | 34.51  | 274.28 | 63    |       |     |
|                                        |                    |      | Hispanic | 1992  | 21    | 18   | 24     | 94     | 18.73  | 16.44 | 21.33 | 99  |
|                                        |                    |      |          | 1993  | 19    | 10   | 25     | 94     | 13.97  | 7.69  | 18.55 | 100 |
|                                        |                    |      |          | 1994  | 23    | 21   | 27     | 95     | 13.94  | 12.42 | 16.35 | 100 |
|                                        |                    |      |          | 1995  | 23    | 13   | 31     | 93     | 11.04  | 6.13  | 15.11 | 100 |
| 1996                                   | 26                 |      |          | 15    | 37    | 93   | 10.21  | 5.66   | 14.24  | 100   |       |     |
| 1997                                   | 31                 |      |          | 17    | 44    | 92   | 9.62   | 5.33   | 13.67  | 100   |       |     |
| 1998                                   | 37                 |      |          | 20    | 54    | 91   | 9.31   | 5.11   | 13.64  | 100   |       |     |
| 1999                                   | 51                 |      |          | 40    | 67    | 91   | 10.51  | 8.21   | 13.76  | 100   |       |     |
| 2000                                   | 53                 |      |          | 27    | 85    | 88   | 9.28   | 4.67   | 14.81  | 100   |       |     |
| 2001                                   | 74                 |      |          | 53    | 106   | 86   | 11.84  | 8.42   | 16.91  | 100   |       |     |
| 2002                                   | 75                 |      |          | 33    | 133   | 86   | 11.10  | 4.90   | 19.75  | 100   |       |     |
| 2003                                   | 86                 |      |          | 35    | 161   | 83   | 11.97  | 4.84   | 22.48  | 100   |       |     |
| 2004                                   | 94                 |      |          | 35    | 186   | 84   | 12.42  | 4.61   | 24.54  | 99    |       |     |
| 2005                                   | 100                |      |          | 34    | 207   | 83   | 12.29  | 4.18   | 25.40  | 99    |       |     |
| 2006                                   | 102                | 31   | 219      | 84    | 11.48 | 3.55 | 24.77  | 100    |        |       |       |     |
| 2007                                   | 97                 | 27   | 218      | 85    | 10.01 | 2.83 | 22.48  | 100    |        |       |       |     |

| Metropolitan Statistical Area          | PWID Population | Year   | Number | Min   | Max   | Rank  | Rate   | Min    | Max    | Rank  |    |
|----------------------------------------|-----------------|--------|--------|-------|-------|-------|--------|--------|--------|-------|----|
| Charlotte--Gastonia--Rock Hill, NC--SC | Male            | 1992   | 4,523  | 3,972 | 5,153 | 61    | 110.77 | 97.27  | 126.19 | 66    |    |
|                                        |                 | 1993   | 3,848  | 2,118 | 5,109 | 69    | 92.30  | 50.81  | 122.55 | 77    |    |
|                                        |                 | 1994   | 4,345  | 3,870 | 5,095 | 64    | 101.55 | 90.46  | 119.09 | 77    |    |
|                                        |                 | 1995   | 3,727  | 2,068 | 5,101 | 69    | 84.56  | 46.92  | 115.73 | 79    |    |
|                                        |                 | 1996   | 3,677  | 2,039 | 5,127 | 69    | 80.93  | 44.89  | 112.84 | 81    |    |
|                                        |                 | 1997   | 3,624  | 2,010 | 5,151 | 68    | 77.26  | 42.85  | 109.83 | 80    |    |
|                                        |                 | 1998   | 3,600  | 1,974 | 5,272 | 69    | 74.44  | 40.82  | 109.02 | 82    |    |
|                                        |                 | 1999   | 4,116  | 3,217 | 5,392 | 65    | 82.42  | 64.42  | 107.97 | 78    |    |
|                                        |                 | 2000   | 3,585  | 1,804 | 5,721 | 71    | 69.64  | 35.04  | 111.12 | 83    |    |
|                                        |                 | 2001   | 4,227  | 3,007 | 6,037 | 64    | 80.20  | 57.05  | 114.56 | 77    |    |
|                                        |                 | 2002   | 3,689  | 1,627 | 6,563 | 68    | 68.57  | 30.24  | 121.97 | 82    |    |
|                                        |                 | 2003   | 3,766  | 1,523 | 7,072 | 67    | 68.86  | 27.85  | 129.33 | 84    |    |
|                                        |                 | 2004   | 3,852  | 1,429 | 7,607 | 65    | 68.90  | 25.56  | 136.06 | 86    |    |
|                                        |                 | 2005   | 3,966  | 1,350 | 8,198 | 64    | 68.86  | 23.44  | 142.36 | 86    |    |
|                                        | 2006            | 4,110  | 1,273  | 8,872 | 60    | 68.64 | 21.25  | 148.18 | 84     |       |    |
|                                        | 2007            | 4,238  | 1,197  | 9,517 | 60    | 68.40 | 19.33  | 153.60 | 85     |       |    |
|                                        |                 | Female | 1992   | 2,694 | 2,365 | 3,069 | 58     | 63.97  | 56.17  | 72.87 | 60 |
|                                        |                 |        | 1993   | 2,350 | 1,294 | 3,120 | 62     | 54.62  | 30.07  | 72.53 | 66 |
|                                        |                 |        | 1994   | 2,700 | 2,405 | 3,166 | 59     | 61.32  | 54.62  | 71.91 | 63 |
|                                        |                 |        | 1995   | 2,338 | 1,297 | 3,200 | 60     | 51.68  | 28.68  | 70.73 | 68 |
|                                        |                 |        | 1996   | 2,313 | 1,283 | 3,225 | 62     | 49.71  | 27.57  | 69.31 | 73 |
|                                        |                 |        | 1997   | 2,273 | 1,261 | 3,231 | 62     | 47.49  | 26.34  | 67.51 | 77 |
|                                        |                 |        | 1998   | 2,239 | 1,228 | 3,279 | 64     | 45.49  | 24.94  | 66.63 | 77 |
|                                        |                 |        | 1999   | 2,526 | 1,975 | 3,310 | 59     | 49.98  | 39.06  | 65.47 | 76 |
|                                        |                 |        | 2000   | 2,162 | 1,088 | 3,450 | 67     | 41.81  | 21.04  | 66.71 | 84 |
|                                        |                 |        | 2001   | 2,495 | 1,775 | 3,564 | 62     | 47.06  | 33.48  | 67.22 | 84 |
|                                        | 2002            |        | 2,124  | 937   | 3,778 | 68    | 39.19  | 17.28  | 69.71  | 89    |    |
|                                        | 2003            |        | 2,108  | 853   | 3,960 | 71    | 38.03  | 15.38  | 71.43  | 89    |    |
|                                        | 2004            | 2,092  | 776    | 4,132 | 72    | 36.92 | 13.69  | 72.90  | 93     |       |    |
|                                        | 2005            | 2,086  | 710    | 4,312 | 68    | 35.64 | 12.13  | 73.67  | 94     |       |    |
|                                        | 2006            | 2,091  | 647    | 4,514 | 74    | 34.37 | 10.64  | 74.20  | 94     |       |    |
|                                        | 2007            | 2,085  | 589    | 4,682 | 75    | 32.91 | 9.30   | 73.90  | 95     |       |    |

| Metropolitan Statistical Area          | PWID Population | Year  | Number      | Min   | Max    | Rank  | Rate   | Min   | Max    | Rank  |        |    |
|----------------------------------------|-----------------|-------|-------------|-------|--------|-------|--------|-------|--------|-------|--------|----|
| Charlotte--Gastonia--Rock Hill, NC--SC | Young (15-29)   | 1992  | 1,868       | 1,640 | 2,128  | 59    | 66.15  | 58.09 | 75.36  | 65    |        |    |
|                                        |                 | 1993  | 1,540       | 848   | 2,044  | 66    | 54.50  | 30.01 | 72.37  | 71    |        |    |
|                                        |                 | 1994  | 1,686       | 1,501 | 1,977  | 66    | 59.16  | 52.70 | 69.38  | 69    |        |    |
|                                        |                 | 1995  | 1,404       | 779   | 1,922  | 71    | 48.55  | 26.94 | 66.45  | 74    |        |    |
|                                        |                 | 1996  | 1,350       | 749   | 1,883  | 71    | 45.79  | 25.40 | 63.84  | 82    |        |    |
|                                        |                 | 1997  | 1,303       | 723   | 1,852  | 73    | 43.17  | 23.94 | 61.37  | 84    |        |    |
|                                        |                 | 1998  | 1,275       | 699   | 1,868  | 76    | 41.37  | 22.68 | 60.58  | 85    |        |    |
|                                        |                 | 1999  | 1,447       | 1,131 | 1,896  | 77    | 46.18  | 36.09 | 60.49  | 86    |        |    |
|                                        |                 | 2000  | 1,263       | 636   | 2,015  | 82    | 39.58  | 19.91 | 63.15  | 91    |        |    |
|                                        |                 | 2001  | 1,507       | 1,072 | 2,153  | 80    | 47.17  | 33.55 | 67.38  | 87    |        |    |
|                                        |                 | 2002  | 1,348       | 594   | 2,397  | 84    | 42.09  | 18.56 | 74.87  | 97    |        |    |
|                                        |                 | 2003  | 1,428       | 578   | 2,682  | 82    | 44.51  | 18.01 | 83.60  | 96    |        |    |
|                                        |                 | 2004  | 1,539       | 571   | 3,038  | 80    | 47.22  | 17.52 | 93.25  | 97    |        |    |
|                                        |                 | 2005  | 1,694       | 577   | 3,503  | 77    | 50.40  | 17.15 | 104.20 | 96    |        |    |
|                                        |                 | 2006  | 1,909       | 591   | 4,121  | 76    | 54.36  | 16.83 | 117.34 | 94    |        |    |
|                                        |                 | 2007  | 2,176       | 615   | 4,886  | 67    | 59.93  | 16.93 | 134.57 | 88    |        |    |
|                                        |                 |       | Old (30-64) | 1992  | 5,437  | 4,775 | 6,194  | 58    | 99.39  | 87.28 | 113.23 | 65 |
|                                        |                 |       |             | 1993  | 4,663  | 2,567 | 6,191  | 64    | 82.57  | 45.46 | 109.64 | 74 |
|                                        |                 |       |             | 1994  | 5,315  | 4,734 | 6,232  | 61    | 91.13  | 81.18 | 106.87 | 71 |
|                                        |                 |       |             | 1995  | 4,605  | 2,555 | 6,302  | 66    | 76.25  | 42.31 | 104.36 | 76 |
| 1996                                   | 4,589           |       |             | 2,545 | 6,398  | 65    | 73.44  | 40.73 | 102.39 | 75    |        |    |
| 1997                                   | 4,565           |       |             | 2,531 | 6,489  | 65    | 70.68  | 39.20 | 100.47 | 76    |        |    |
| 1998                                   | 4,572           |       |             | 2,507 | 6,696  | 63    | 68.49  | 37.55 | 100.31 | 76    |        |    |
| 1999                                   | 5,262           |       |             | 4,113 | 6,893  | 56    | 76.10  | 59.48 | 99.69  | 73    |        |    |
| 2000                                   | 4,606           |       |             | 2,317 | 7,349  | 61    | 64.59  | 32.50 | 103.07 | 73    |        |    |
| 2001                                   | 5,443           |       |             | 3,872 | 7,775  | 55    | 73.79  | 52.49 | 105.40 | 69    |        |    |
| 2002                                   | 4,750           |       |             | 2,095 | 8,450  | 58    | 62.52  | 27.57 | 111.21 | 74    |        |    |
| 2003                                   | 4,832           |       |             | 1,955 | 9,075  | 56    | 61.92  | 25.05 | 116.30 | 74    |        |    |
| 2004                                   | 4,905           |       |             | 1,820 | 9,687  | 53    | 61.32  | 22.75 | 121.09 | 74    |        |    |
| 2005                                   | 4,981           |       |             | 1,695 | 10,296 | 52    | 60.37  | 20.55 | 124.81 | 72    |        |    |
| 2006                                   | 5,044           |       |             | 1,562 | 10,889 | 51    | 58.94  | 18.25 | 127.24 | 71    |        |    |
| 2007                                   | 5,013           | 1,417 | 11,258      | 48    | 56.32  | 15.91 | 126.48 | 69    |        |       |        |    |



| Metropolitan Statistical Area | PWID Population | Year  | Number             | Min    | Max    | Rank  | Rate   | Min   | Max    | Rank  |       |    |
|-------------------------------|-----------------|-------|--------------------|--------|--------|-------|--------|-------|--------|-------|-------|----|
| Chicago, IL                   | Total           | 1992  | 36,552             | 15,837 | 58,582 | 5     | 72.10  | 31.24 | 115.56 | 79    |       |    |
|                               |                 | 1993  | 31,875             | 17,413 | 55,069 | 9     | 62.16  | 33.96 | 107.39 | 82    |       |    |
|                               |                 | 1994  | 36,775             | 20,352 | 51,425 | 5     | 71.00  | 39.29 | 99.28  | 81    |       |    |
|                               |                 | 1995  | 31,812             | 16,484 | 47,943 | 7     | 60.84  | 31.52 | 91.69  | 81    |       |    |
|                               |                 | 1996  | 31,918             | 16,067 | 44,743 | 7     | 60.40  | 30.40 | 84.67  | 82    |       |    |
|                               |                 | 1997  | 32,084             | 15,650 | 43,438 | 7     | 60.11  | 29.32 | 81.38  | 81    |       |    |
|                               |                 | 1998  | 32,425             | 15,263 | 45,256 | 7     | 59.98  | 28.23 | 83.71  | 79    |       |    |
|                               |                 | 1999  | 38,744             | 32,779 | 47,020 | 7     | 70.91  | 59.99 | 86.05  | 74    |       |    |
|                               |                 | 2000  | 32,964             | 14,185 | 48,978 | 7     | 59.64  | 25.67 | 88.62  | 76    |       |    |
|                               |                 | 2001  | 39,767             | 31,779 | 50,956 | 7     | 71.16  | 56.86 | 91.18  | 70    |       |    |
|                               |                 | 2002  | 33,238             | 14,619 | 52,760 | 7     | 58.98  | 25.94 | 93.62  | 77    |       |    |
|                               |                 | 2003  | 33,027             | 14,793 | 54,490 | 7     | 58.22  | 26.08 | 96.06  | 79    |       |    |
|                               |                 | 2004  | 32,711             | 15,085 | 56,317 | 8     | 57.19  | 26.37 | 98.46  | 80    |       |    |
|                               |                 | 2005  | 32,404             | 15,399 | 58,112 | 8     | 56.25  | 26.73 | 100.87 | 83    |       |    |
|                               |                 | 2006  | 32,112             | 15,733 | 60,083 | 8     | 55.28  | 27.08 | 103.43 | 86    |       |    |
|                               |                 | 2007  | 31,814             | 16,126 | 62,046 | 8     | 54.35  | 27.55 | 106.00 | 89    |       |    |
|                               |                 |       | Non-Hispanic White | 1992   | 12,355 | 5,353 | 19,802 | 15    | 37.39  | 16.20 | 59.93 | 89 |
|                               |                 |       |                    | 1993   | 10,222 | 5,584 | 17,660 | 20    | 30.93  | 16.90 | 53.43 | 91 |
|                               |                 |       |                    | 1994   | 11,424 | 6,322 | 15,975 | 14    | 34.60  | 19.15 | 48.39 | 91 |
|                               |                 |       |                    | 1995   | 9,749  | 5,052 | 14,693 | 21    | 29.60  | 15.34 | 44.62 | 93 |
| 1996                          | 9,801           |       |                    | 4,934  | 13,740 | 18    | 29.82  | 15.01 | 41.80  | 93    |       |    |
| 1997                          | 9,994           |       |                    | 4,875  | 13,531 | 17    | 30.47  | 14.86 | 41.25  | 91    |       |    |
| 1998                          | 10,340          |       |                    | 4,867  | 14,432 | 16    | 31.52  | 14.84 | 43.99  | 91    |       |    |
| 1999                          | 12,723          |       |                    | 10,764 | 15,440 | 12    | 38.88  | 32.89 | 47.19  | 84    |       |    |
| 2000                          | 11,179          |       |                    | 4,810  | 16,609 | 15    | 34.18  | 14.71 | 50.79  | 87    |       |    |
| 2001                          | 13,926          |       |                    | 11,128 | 17,844 | 9     | 42.39  | 33.88 | 54.32  | 82    |       |    |
| 2002                          | 11,987          |       |                    | 5,272  | 19,027 | 14    | 36.45  | 16.03 | 57.86  | 87    |       |    |
| 2003                          | 12,203          |       |                    | 5,466  | 20,134 | 14    | 37.13  | 16.63 | 61.26  | 91    |       |    |
| 2004                          | 12,292          |       |                    | 5,668  | 21,163 | 14    | 37.34  | 17.22 | 64.28  | 93    |       |    |
| 2005                          | 12,267          |       |                    | 5,829  | 22,000 | 15    | 37.25  | 17.70 | 66.81  | 94    |       |    |
| 2006                          | 12,107          |       |                    | 5,932  | 22,653 | 15    | 36.73  | 17.99 | 68.72  | 93    |       |    |
| 2007                          | 11,785          | 5,974 | 22,984             | 16     | 35.72  | 18.11 | 69.66  | 92    |        |       |       |    |

| Metropolitan Statistical Area | PWID Population    | Year  | Number   | Min    | Max    | Rank  | Rate   | Min    | Max    | Rank  |       |    |
|-------------------------------|--------------------|-------|----------|--------|--------|-------|--------|--------|--------|-------|-------|----|
| Chicago, IL                   | Non-Hispanic Black | 1992  | 19,525   | 8,460  | 31,292 | 5     | 207.92 | 90.09  | 333.24 | 73    |       |    |
|                               |                    | 1993  | 17,227   | 9,411  | 29,763 | 6     | 181.52 | 99.16  | 313.60 | 74    |       |    |
|                               |                    | 1994  | 19,818   | 10,968 | 27,713 | 5     | 207.03 | 114.57 | 289.50 | 68    |       |    |
|                               |                    | 1995  | 16,891   | 8,753  | 25,457 | 5     | 174.85 | 90.60  | 263.51 | 71    |       |    |
|                               |                    | 1996  | 16,538   | 8,325  | 23,184 | 5     | 169.81 | 85.48  | 238.04 | 68    |       |    |
|                               |                    | 1997  | 16,101   | 7,854  | 21,799 | 5     | 163.93 | 79.96  | 221.94 | 66    |       |    |
|                               |                    | 1998  | 15,680   | 7,381  | 21,885 | 6     | 158.38 | 74.55  | 221.05 | 68    |       |    |
|                               |                    | 1999  | 18,012   | 15,239 | 21,859 | 3     | 180.57 | 152.77 | 219.14 | 59    |       |    |
|                               |                    | 2000  | 14,748   | 6,346  | 21,913 | 6     | 147.00 | 63.26  | 218.41 | 66    |       |    |
|                               |                    | 2001  | 17,205   | 13,749 | 22,045 | 4     | 170.91 | 136.58 | 219.00 | 56    |       |    |
|                               |                    | 2002  | 14,030   | 6,171  | 22,270 | 5     | 138.94 | 61.11  | 220.55 | 61    |       |    |
|                               |                    | 2003  | 13,781   | 6,173  | 22,737 | 5     | 136.09 | 60.95  | 224.52 | 59    |       |    |
|                               |                    | 2004  | 13,723   | 6,328  | 23,627 | 5     | 134.65 | 62.09  | 231.83 | 58    |       |    |
|                               |                    | 2005  | 13,944   | 6,626  | 25,006 | 3     | 136.11 | 64.68  | 244.10 | 59    |       |    |
|                               |                    | 2006  | 14,480   | 7,094  | 27,092 | 3     | 140.57 | 68.87  | 263.01 | 55    |       |    |
|                               |                    | 2007  | 15,344   | 7,778  | 29,925 | 3     | 148.47 | 75.26  | 289.56 | 51    |       |    |
|                               |                    |       | Hispanic | 1992   | 3,408  | 1,477 | 5,462  | 24     | 55.11  | 23.88 | 88.32 | 83 |
|                               |                    |       |          | 1993   | 3,123  | 1,706 | 5,396  | 26     | 47.80  | 26.11 | 82.57 | 82 |
|                               |                    |       |          | 1994   | 3,773  | 2,088 | 5,276  | 21     | 54.75  | 30.30 | 76.56 | 78 |
|                               |                    |       |          | 1995   | 3,402  | 1,763 | 5,127  | 21     | 46.86  | 24.28 | 70.62 | 79 |
| 1996                          | 3,541              |       |          | 1,782  | 4,963  | 20    | 46.13  | 23.22  | 64.67  | 79    |       |    |
| 1997                          | 3,673              |       |          | 1,791  | 4,972  | 18    | 45.45  | 22.17  | 61.53  | 76    |       |    |
| 1998                          | 3,809              |       |          | 1,793  | 5,317  | 16    | 44.55  | 20.97  | 62.18  | 74    |       |    |
| 1999                          | 4,645              |       |          | 3,929  | 5,637  | 16    | 51.62  | 43.68  | 62.65  | 71    |       |    |
| 2000                          | 4,009              |       |          | 1,725  | 5,956  | 17    | 42.45  | 18.27  | 63.07  | 74    |       |    |
| 2001                          | 4,876              |       |          | 3,897  | 6,248  | 16    | 49.91  | 39.88  | 63.95  | 69    |       |    |
| 2002                          | 4,085              |       |          | 1,797  | 6,484  | 17    | 40.54  | 17.83  | 64.35  | 72    |       |    |
| 2003                          | 4,044              |       |          | 1,811  | 6,672  | 17    | 39.08  | 17.50  | 64.48  | 71    |       |    |
| 2004                          | 3,967              |       |          | 1,830  | 6,831  | 17    | 37.40  | 17.25  | 64.39  | 72    |       |    |
| 2005                          | 3,872              |       |          | 1,840  | 6,944  | 18    | 35.56  | 16.90  | 63.78  | 73    |       |    |
| 2006                          | 3,762              | 1,843 | 7,038    | 19     | 33.62  | 16.47 | 62.90  | 75     |        |       |       |    |
| 2007                          | 3,638              | 1,844 | 7,096    | 20     | 31.66  | 16.05 | 61.74  | 77     |        |       |       |    |

| Metropolitan Statistical Area | PWID Population | Year   | Number | Min    | Max    | Rank   | Rate   | Min    | Max    | Rank  |    |
|-------------------------------|-----------------|--------|--------|--------|--------|--------|--------|--------|--------|-------|----|
| Chicago, IL                   | Male            | 1992   | 25,367 | 10,991 | 40,656 | 5      | 101.14 | 43.82  | 162.10 | 78    |    |
|                               |                 | 1993   | 21,964 | 11,999 | 37,946 | 7      | 86.57  | 47.29  | 149.56 | 81    |    |
|                               |                 | 1994   | 25,143 | 13,915 | 35,159 | 5      | 98.07  | 54.27  | 137.14 | 79    |    |
|                               |                 | 1995   | 21,568 | 11,176 | 32,505 | 7      | 83.27  | 43.15  | 125.50 | 81    |    |
|                               |                 | 1996   | 21,449 | 10,797 | 30,068 | 7      | 81.89  | 41.22  | 114.80 | 79    |    |
|                               |                 | 1997   | 21,362 | 10,420 | 28,922 | 7      | 80.74  | 39.38  | 109.31 | 79    |    |
|                               |                 | 1998   | 21,384 | 10,066 | 29,846 | 7      | 79.78  | 37.55  | 111.35 | 78    |    |
|                               |                 | 1999   | 25,304 | 21,408 | 30,709 | 7      | 93.40  | 79.02  | 113.35 | 69    |    |
|                               |                 | 2000   | 21,319 | 9,174  | 31,676 | 7      | 77.68  | 33.43  | 115.42 | 76    |    |
|                               |                 | 2001   | 25,470 | 20,353 | 32,636 | 7      | 91.69  | 73.27  | 117.49 | 66    |    |
|                               |                 | 2002   | 21,086 | 9,274  | 33,469 | 8      | 75.22  | 33.08  | 119.40 | 77    |    |
|                               |                 | 2003   | 20,759 | 9,298  | 34,249 | 9      | 73.55  | 32.94  | 121.34 | 78    |    |
|                               |                 | 2004   | 20,381 | 9,398  | 35,088 | 9      | 71.48  | 32.96  | 123.06 | 81    |    |
|                               |                 | 2005   | 20,025 | 9,516  | 35,913 | 9      | 69.67  | 33.11  | 124.93 | 83    |    |
|                               | 2006            | 19,699 | 9,651  | 36,857 | 11     | 67.91  | 33.27  | 127.05 | 86     |       |    |
|                               | 2007            | 19,390 | 9,828  | 37,815 | 11     | 66.28  | 33.60  | 129.27 | 89     |       |    |
|                               |                 | Female | 1992   | 11,209 | 4,856  | 17,964 | 7      | 43.76  | 18.96  | 70.14 | 84 |
|                               |                 |        | 1993   | 10,009 | 5,468  | 17,291 | 12     | 38.63  | 21.10  | 66.74 | 85 |
|                               |                 |        | 1994   | 11,824 | 6,544  | 16,534 | 6      | 45.20  | 25.02  | 63.21 | 83 |
|                               |                 |        | 1995   | 10,469 | 5,425  | 15,777 | 8      | 39.67  | 20.56  | 59.78 | 85 |
|                               |                 |        | 1996   | 10,741 | 5,407  | 15,057 | 8      | 40.30  | 20.29  | 56.49 | 85 |
|                               |                 |        | 1997   | 11,027 | 5,379  | 14,929 | 7      | 40.96  | 19.98  | 55.45 | 86 |
|                               |                 |        | 1998   | 11,363 | 5,348  | 15,859 | 7      | 41.69  | 19.62  | 58.18 | 83 |
|                               |                 |        | 1999   | 13,814 | 11,687 | 16,765 | 7      | 50.15  | 42.43  | 60.86 | 75 |
|                               |                 |        | 2000   | 11,930 | 5,134  | 17,726 | 6      | 42.88  | 18.45  | 63.71 | 81 |
|                               |                 |        | 2001   | 14,569 | 11,642 | 18,667 | 6      | 51.83  | 41.42  | 66.42 | 71 |
|                               | 2002            |        | 12,287 | 5,404  | 19,504 | 6      | 43.38  | 19.08  | 68.86  | 82    |    |
|                               | 2003            |        | 12,278 | 5,499  | 20,256 | 7      | 43.08  | 19.29  | 71.07  | 83    |    |
|                               | 2004            | 12,182 | 5,618  | 20,973 | 8      | 42.47  | 19.59  | 73.12  | 83     |       |    |
|                               | 2005            | 12,038 | 5,721  | 21,589 | 8      | 41.71  | 19.82  | 74.79  | 84     |       |    |
|                               | 2006            | 11,846 | 5,804  | 22,165 | 8      | 40.74  | 19.96  | 76.22  | 86     |       |    |
|                               | 2007            | 11,597 | 5,878  | 22,617 | 8      | 39.60  | 20.07  | 77.24  | 86     |       |    |

| Metropolitan Statistical Area | PWID Population | Year   | Number      | Min    | Max    | Rank   | Rate   | Min   | Max    | Rank  |        |    |
|-------------------------------|-----------------|--------|-------------|--------|--------|--------|--------|-------|--------|-------|--------|----|
| Chicago, IL                   | Young (15-29)   | 1992   | 7,414       | 3,212  | 11,882 | 13     | 42.87  | 18.58 | 68.71  | 85    |        |    |
|                               |                 | 1993   | 5,959       | 3,255  | 10,295 | 18     | 34.70  | 18.96 | 59.95  | 89    |        |    |
|                               |                 | 1994   | 6,701       | 3,708  | 9,370  | 11     | 39.21  | 21.70 | 54.84  | 88    |        |    |
|                               |                 | 1995   | 5,925       | 3,070  | 8,930  | 16     | 34.64  | 17.95 | 52.20  | 88    |        |    |
|                               |                 | 1996   | 6,312       | 3,177  | 8,849  | 11     | 36.70  | 18.48 | 51.45  | 89    |        |    |
|                               |                 | 1997   | 6,925       | 3,378  | 9,376  | 11     | 40.00  | 19.51 | 54.16  | 86    |        |    |
|                               |                 | 1998   | 7,768       | 3,657  | 10,842 | 7      | 44.37  | 20.89 | 61.93  | 81    |        |    |
|                               |                 | 1999   | 10,371      | 8,774  | 12,587 | 7      | 58.81  | 49.76 | 71.37  | 72    |        |    |
|                               |                 | 2000   | 9,833       | 4,231  | 14,610 | 6      | 55.36  | 23.82 | 82.25  | 76    |        |    |
|                               |                 | 2001   | 13,075      | 10,449 | 16,754 | 6      | 73.71  | 58.90 | 94.45  | 67    |        |    |
|                               |                 | 2002   | 11,836      | 5,206  | 18,788 | 6      | 66.96  | 29.45 | 106.29 | 72    |        |    |
|                               |                 | 2003   | 12,445      | 5,574  | 20,532 | 6      | 70.49  | 31.57 | 116.30 | 71    |        |    |
|                               |                 | 2004   | 12,678      | 5,846  | 21,826 | 6      | 71.29  | 32.87 | 122.73 | 76    |        |    |
|                               |                 | 2005   | 12,486      | 5,933  | 22,392 | 6      | 69.92  | 33.23 | 125.39 | 77    |        |    |
|                               |                 | 2006   | 11,804      | 5,783  | 22,086 | 7      | 65.62  | 32.15 | 122.78 | 83    |        |    |
|                               |                 | 2007   | 10,593      | 5,370  | 20,660 | 9      | 58.53  | 29.67 | 114.16 | 89    |        |    |
|                               |                 |        | Old (30-64) | 1992   | 29,737 | 12,884 | 47,659 | 5     | 89.03  | 38.57 | 142.69 | 72 |
|                               |                 |        |             | 1993   | 26,095 | 14,255 | 45,082 | 7     | 76.51  | 41.80 | 132.18 | 79 |
|                               |                 |        |             | 1994   | 30,053 | 16,632 | 42,025 | 5     | 86.58  | 47.92 | 121.08 | 76 |
|                               |                 |        |             | 1995   | 25,775 | 13,356 | 38,845 | 7     | 73.26  | 37.96 | 110.41 | 79 |
|                               |                 |        |             | 1996   | 25,482 | 12,827 | 35,721 | 7     | 71.49  | 35.98 | 100.21 | 78 |
| 1997                          | 25,091          |        |             | 12,239 | 33,970 | 7      | 69.57  | 33.93 | 94.19  | 77    |        |    |
| 1998                          | 24,701          |        |             | 11,627 | 34,476 | 7      | 67.58  | 31.81 | 94.32  | 77    |        |    |
| 1999                          | 28,611          |        |             | 24,206 | 34,723 | 7      | 77.32  | 65.41 | 93.83  | 72    |        |    |
| 2000                          | 23,514          |        |             | 10,119 | 34,937 | 8      | 62.69  | 26.98 | 93.15  | 77    |        |    |
| 2001                          | 27,360          |        |             | 21,864 | 35,057 | 7      | 71.72  | 57.32 | 91.90  | 73    |        |    |
| 2002                          | 22,088          |        |             | 9,715  | 35,061 | 11     | 57.11  | 25.12 | 90.64  | 81    |        |    |
| 2003                          | 21,308          |        |             | 9,544  | 35,154 | 11     | 54.53  | 24.42 | 89.97  | 79    |        |    |
| 2004                          | 20,673          |        |             | 9,533  | 35,592 | 11     | 52.45  | 24.19 | 90.31  | 81    |        |    |
| 2005                          | 20,321          |        |             | 9,657  | 36,443 | 9      | 51.12  | 24.29 | 91.68  | 81    |        |    |
| 2006                          | 20,303          |        |             | 9,947  | 37,988 | 9      | 50.63  | 24.81 | 94.74  | 79    |        |    |
| 2007                          | 20,635          | 10,460 | 40,244      | 9      | 51.03  | 25.87  | 99.52  | 75    |        |       |        |    |

| Metropolitan Statistical Area | PWID Population | Year  | Number             | Min   | Max    | Rank  | Rate  | Min   | Max    | Rank  |        |    |
|-------------------------------|-----------------|-------|--------------------|-------|--------|-------|-------|-------|--------|-------|--------|----|
| Cincinnati, OH--KY--IN        | Total           | 1992  | 8,149              | 1,895 | 15,519 | 55    | 80.31 | 18.67 | 152.94 | 70    |        |    |
|                               |                 | 1993  | 6,621              | 2,147 | 14,684 | 61    | 64.56 | 20.93 | 143.18 | 81    |        |    |
|                               |                 | 1994  | 7,535              | 2,415 | 13,835 | 58    | 73.01 | 23.40 | 134.05 | 78    |        |    |
|                               |                 | 1995  | 6,146              | 2,692 | 13,002 | 67    | 59.05 | 25.86 | 124.92 | 82    |        |    |
|                               |                 | 1996  | 5,951              | 2,830 | 12,265 | 68    | 56.72 | 26.98 | 116.90 | 84    |        |    |
|                               |                 | 1997  | 5,765              | 2,804 | 11,525 | 69    | 54.46 | 26.49 | 108.88 | 84    |        |    |
|                               |                 | 1998  | 5,606              | 2,781 | 10,828 | 69    | 52.42 | 26.01 | 101.26 | 88    |        |    |
|                               |                 | 1999  | 6,334              | 4,023 | 10,098 | 66    | 58.73 | 37.30 | 93.63  | 82    |        |    |
|                               |                 | 2000  | 5,503              | 2,823 | 9,955  | 71    | 50.51 | 25.91 | 91.37  | 91    |        |    |
|                               |                 | 2001  | 6,487              | 4,418 | 9,840  | 66    | 58.76 | 40.01 | 89.12  | 82    |        |    |
|                               |                 | 2002  | 5,737              | 3,096 | 9,810  | 72    | 51.42 | 27.75 | 87.92  | 90    |        |    |
|                               |                 | 2003  | 5,872              | 3,230 | 9,774  | 71    | 52.11 | 28.66 | 86.73  | 89    |        |    |
|                               |                 | 2004  | 6,129              | 3,699 | 9,831  | 69    | 53.79 | 32.47 | 86.29  | 89    |        |    |
|                               |                 | 2005  | 6,418              | 3,607 | 9,901  | 67    | 55.65 | 31.28 | 85.85  | 84    |        |    |
|                               |                 | 2006  | 6,721              | 3,425 | 10,004 | 61    | 57.68 | 29.40 | 85.85  | 80    |        |    |
|                               |                 | 2007  | 7,056              | 3,246 | 10,126 | 59    | 59.83 | 27.52 | 85.85  | 77    |        |    |
|                               |                 |       | Non-Hispanic White | 1992  | 5,043  | 1,172 | 9,602 | 48    | 57.71  | 13.42 | 109.89 | 67 |
|                               |                 |       |                    | 1993  | 4,065  | 1,318 | 9,014 | 54    | 46.14  | 14.96 | 102.32 | 74 |
|                               |                 |       |                    | 1994  | 4,565  | 1,463 | 8,382 | 49    | 51.59  | 16.53 | 94.73  | 74 |
|                               |                 |       |                    | 1995  | 3,663  | 1,604 | 7,748 | 60    | 41.14  | 18.02 | 87.03  | 79 |
| 1996                          | 3,485           |       |                    | 1,657 | 7,182  | 62    | 38.93 | 18.51 | 80.22  | 81    |        |    |
| 1997                          | 3,321           |       |                    | 1,616 | 6,640  | 64    | 36.86 | 17.93 | 73.68  | 83    |        |    |
| 1998                          | 3,189           |       |                    | 1,582 | 6,160  | 66    | 35.11 | 17.42 | 67.82  | 85    |        |    |
| 1999                          | 3,582           |       |                    | 2,275 | 5,710  | 63    | 39.18 | 24.89 | 62.47  | 83    |        |    |
| 2000                          | 3,120           |       |                    | 1,600 | 5,644  | 67    | 33.88 | 17.38 | 61.28  | 88    |        |    |
| 2001                          | 3,729           |       |                    | 2,540 | 5,656  | 61    | 40.07 | 27.29 | 60.77  | 85    |        |    |
| 2002                          | 3,386           |       |                    | 1,827 | 5,789  | 64    | 36.09 | 19.48 | 61.72  | 89    |        |    |
| 2003                          | 3,604           |       |                    | 1,983 | 5,999  | 60    | 38.12 | 20.97 | 63.45  | 88    |        |    |
| 2004                          | 3,960           |       |                    | 2,390 | 6,352  | 57    | 41.54 | 25.08 | 66.64  | 86    |        |    |
| 2005                          | 4,410           |       |                    | 2,479 | 6,803  | 49    | 45.82 | 25.75 | 70.68  | 83    |        |    |
| 2006                          | 4,942           |       |                    | 2,519 | 7,356  | 43    | 50.96 | 25.97 | 75.86  | 78    |        |    |
| 2007                          | 5,563           | 2,559 | 7,982              | 39    | 56.82  | 26.14 | 81.53 | 71    |        |       |        |    |

| Metropolitan Statistical Area | PWID Population    | Year | Number   | Min   | Max   | Rank  | Rate   | Min    | Max    | Rank  |        |    |
|-------------------------------|--------------------|------|----------|-------|-------|-------|--------|--------|--------|-------|--------|----|
| Cincinnati, OH--KY--IN        | Non-Hispanic Black | 1992 | 2,770    | 644   | 5,275 | 41    | 224.76 | 52.26  | 428.02 | 69    |        |    |
|                               |                    | 1993 | 2,241    | 727   | 4,970 | 43    | 178.38 | 57.83  | 395.58 | 76    |        |    |
|                               |                    | 1994 | 2,565    | 822   | 4,710 | 39    | 201.48 | 64.57  | 369.94 | 71    |        |    |
|                               |                    | 1995 | 2,117    | 927   | 4,478 | 43    | 163.67 | 71.67  | 346.21 | 75    |        |    |
|                               |                    | 1996 | 2,078    | 988   | 4,283 | 43    | 158.49 | 75.38  | 326.64 | 74    |        |    |
|                               |                    | 1997 | 2,038    | 991   | 4,074 | 43    | 153.14 | 74.49  | 306.15 | 75    |        |    |
|                               |                    | 1998 | 1,995    | 990   | 3,854 | 41    | 147.92 | 73.39  | 285.72 | 71    |        |    |
|                               |                    | 1999 | 2,249    | 1,429 | 3,586 | 38    | 164.98 | 104.78 | 263.03 | 67    |        |    |
|                               |                    | 2000 | 1,925    | 987   | 3,483 | 41    | 139.63 | 71.62  | 252.58 | 68    |        |    |
|                               |                    | 2001 | 2,198    | 1,497 | 3,334 | 39    | 156.05 | 106.28 | 236.69 | 63    |        |    |
|                               |                    | 2002 | 1,843    | 994   | 3,151 | 43    | 128.55 | 69.36  | 219.81 | 67    |        |    |
|                               |                    | 2003 | 1,740    | 957   | 2,897 | 43    | 119.47 | 65.72  | 198.85 | 66    |        |    |
|                               |                    | 2004 | 1,622    | 979   | 2,601 | 46    | 109.16 | 65.89  | 175.10 | 71    |        |    |
|                               |                    | 2005 | 1,457    | 819   | 2,247 | 54    | 96.16  | 54.05  | 148.33 | 73    |        |    |
|                               |                    | 2006 | 1,249    | 637   | 1,859 | 60    | 80.85  | 41.20  | 120.34 | 79    |        |    |
|                               |                    | 2007 | 1,019    | 469   | 1,462 | 65    | 64.55  | 29.69  | 92.63  | 88    |        |    |
|                               |                    |      | Hispanic | 1992  | 44    | 10    | 83     | 87     | 70.60  | 16.42 | 134.45 | 71 |
|                               |                    |      |          | 1993  | 43    | 14    | 95     | 87     | 63.77  | 20.68 | 141.43 | 71 |
|                               |                    |      |          | 1994  | 56    | 18    | 103    | 85     | 77.82  | 24.94 | 142.89 | 66 |
|                               |                    |      |          | 1995  | 51    | 22    | 107    | 86     | 65.41  | 28.64 | 138.36 | 65 |
| 1996                          | 52                 |      |          | 25    | 108   | 86    | 62.22  | 29.59  | 128.22 | 67    |        |    |
| 1997                          | 53                 |      |          | 26    | 105   | 86    | 57.80  | 28.12  | 115.55 | 68    |        |    |
| 1998                          | 51                 |      |          | 26    | 99    | 88    | 51.65  | 25.63  | 99.77  | 72    |        |    |
| 1999                          | 57                 |      |          | 36    | 91    | 88    | 52.85  | 33.57  | 84.26  | 69    |        |    |
| 2000                          | 48                 |      |          | 25    | 87    | 91    | 39.68  | 20.35  | 71.79  | 75    |        |    |
| 2001                          | 54                 |      |          | 37    | 82    | 91    | 41.47  | 28.24  | 62.90  | 74    |        |    |
| 2002                          | 46                 |      |          | 25    | 78    | 91    | 32.83  | 17.71  | 56.13  | 79    |        |    |
| 2003                          | 44                 |      |          | 24    | 74    | 91    | 30.29  | 16.66  | 50.41  | 81    |        |    |
| 2004                          | 44                 |      |          | 27    | 71    | 92    | 28.24  | 17.05  | 45.31  | 82    |        |    |
| 2005                          | 44                 |      |          | 25    | 69    | 92    | 26.89  | 15.12  | 41.48  | 84    |        |    |
| 2006                          | 46                 | 23   | 68       | 94    | 26.09 | 13.30 | 38.84  | 83     |        |       |        |    |
| 2007                          | 48                 | 22   | 69       | 94    | 25.91 | 11.92 | 37.18  | 85     |        |       |        |    |

| Metropolitan Statistical Area | PWID Population | Year   | Number | Min   | Max    | Rank  | Rate   | Min   | Max    | Rank   |    |
|-------------------------------|-----------------|--------|--------|-------|--------|-------|--------|-------|--------|--------|----|
| Cincinnati, OH--KY--IN        | Male            | 1992   | 5,422  | 1,261 | 10,324 | 54    | 109.28 | 25.41 | 208.11 | 68     |    |
|                               |                 | 1993   | 4,382  | 1,421 | 9,719  | 62    | 87.31  | 28.31 | 193.62 | 80     |    |
|                               |                 | 1994   | 4,944  | 1,584 | 9,077  | 59    | 97.78  | 31.33 | 179.53 | 80     |    |
|                               |                 | 1995   | 3,985  | 1,745 | 8,429  | 67    | 78.06  | 34.18 | 165.12 | 84     |    |
|                               |                 | 1996   | 3,803  | 1,809 | 7,837  | 67    | 73.84  | 35.12 | 152.18 | 86     |    |
|                               |                 | 1997   | 3,623  | 1,763 | 7,244  | 69    | 69.71  | 33.91 | 139.36 | 86     |    |
|                               |                 | 1998   | 3,461  | 1,717 | 6,685  | 73    | 65.85  | 32.67 | 127.20 | 88     |    |
|                               |                 | 1999   | 3,839  | 2,438 | 6,120  | 67    | 72.34  | 45.94 | 115.32 | 85     |    |
|                               |                 | 2000   | 3,275  | 1,680 | 5,924  | 75    | 61.03  | 31.30 | 110.39 | 92     |    |
|                               |                 | 2001   | 3,794  | 2,584 | 5,755  | 71    | 69.71  | 47.48 | 105.74 | 86     |    |
|                               |                 | 2002   | 3,305  | 1,783 | 5,651  | 75    | 60.07  | 32.41 | 102.71 | 94     |    |
|                               |                 | 2003   | 3,342  | 1,839 | 5,563  | 74    | 60.08  | 33.05 | 100.00 | 94     |    |
|                               |                 | 2004   | 3,460  | 2,089 | 5,551  | 72    | 61.47  | 37.11 | 98.61  | 94     |    |
|                               |                 | 2005   | 3,614  | 2,031 | 5,574  | 69    | 63.35  | 35.61 | 97.72  | 94     |    |
|                               | 2006            | 3,797  | 1,935  | 5,651 | 67     | 65.85 | 33.56  | 98.02 | 91     |        |    |
|                               | 2007            | 4,027  | 1,852  | 5,778 | 65     | 68.94 | 31.71  | 98.93 | 84     |        |    |
|                               |                 | Female | 1992   | 2,881 | 670    | 5,486 | 52     | 55.55 | 12.92  | 105.79 | 68 |
|                               |                 |        | 1993   | 2,376 | 770    | 5,269 | 61     | 45.38 | 14.71  | 100.64 | 80 |
|                               |                 |        | 1994   | 2,755 | 883    | 5,058 | 57     | 52.32 | 16.77  | 96.07  | 75 |
|                               |                 |        | 1995   | 2,295 | 1,005  | 4,856 | 61     | 43.28 | 18.95  | 91.56  | 82 |
|                               |                 |        | 1996   | 2,274 | 1,082  | 4,687 | 63     | 42.57 | 20.25  | 87.74  | 84 |
|                               |                 |        | 1997   | 2,256 | 1,097  | 4,510 | 64     | 41.88 | 20.37  | 83.73  | 84 |
|                               |                 |        | 1998   | 2,246 | 1,114  | 4,339 | 63     | 41.31 | 20.50  | 79.79  | 84 |
|                               |                 |        | 1999   | 2,597 | 1,649  | 4,140 | 58     | 47.40 | 30.11  | 75.57  | 82 |
|                               |                 |        | 2000   | 2,304 | 1,182  | 4,168 | 64     | 41.68 | 21.38  | 75.40  | 85 |
|                               |                 |        | 2001   | 2,768 | 1,885  | 4,198 | 58     | 49.44 | 33.67  | 74.99  | 79 |
|                               | 2002            |        | 2,487  | 1,342 | 4,252  | 63    | 43.97  | 23.73 | 75.18  | 80     |    |
|                               | 2003            |        | 2,576  | 1,417 | 4,288  | 60    | 45.14  | 24.83 | 75.13  | 80     |    |
|                               | 2004            | 2,710  | 1,635  | 4,346 | 57     | 47.01 | 28.38  | 75.41 | 78     |        |    |
|                               | 2005            | 2,845  | 1,599  | 4,389 | 52     | 48.82 | 27.44  | 75.31 | 75     |        |    |
|                               | 2006            | 2,971  | 1,514  | 4,422 | 52     | 50.46 | 25.72  | 75.11 | 69     |        |    |
|                               | 2007            | 3,090  | 1,421  | 4,434 | 49     | 51.91 | 23.88  | 74.49 | 68     |        |    |

| Metropolitan Statistical Area | PWID Population | Year        | Number | Min   | Max   | Rank   | Rate  | Min    | Max    | Rank   |    |
|-------------------------------|-----------------|-------------|--------|-------|-------|--------|-------|--------|--------|--------|----|
| Cincinnati, OH--KY--IN        | Young (15-29)   | 1992        | 2,117  | 492   | 4,031 | 52     | 62.17 | 14.45  | 118.39 | 71     |    |
|                               |                 | 1993        | 1,523  | 494   | 3,377 | 67     | 44.99 | 14.59  | 99.77  | 78     |    |
|                               |                 | 1994        | 1,606  | 515   | 2,950 | 67     | 47.88 | 15.34  | 87.91  | 81     |    |
|                               |                 | 1995        | 1,269  | 556   | 2,684 | 73     | 37.94 | 16.61  | 80.26  | 86     |    |
|                               |                 | 1996        | 1,238  | 589   | 2,551 | 74     | 37.01 | 17.60  | 76.28  | 87     |    |
|                               |                 | 1997        | 1,249  | 607   | 2,496 | 75     | 37.24 | 18.11  | 74.44  | 89     |    |
|                               |                 | 1998        | 1,299  | 644   | 2,509 | 74     | 38.67 | 19.19  | 74.69  | 89     |    |
|                               |                 | 1999        | 1,602  | 1,017 | 2,553 | 74     | 47.89 | 30.42  | 76.35  | 84     |    |
|                               |                 | 2000        | 1,538  | 789   | 2,782 | 75     | 46.10 | 23.65  | 83.39  | 84     |    |
|                               |                 | 2001        | 2,016  | 1,373 | 3,058 | 64     | 60.35 | 41.10  | 91.54  | 77     |    |
|                               |                 | 2002        | 1,981  | 1,069 | 3,388 | 66     | 59.19 | 31.93  | 101.20 | 79     |    |
|                               |                 | 2003        | 2,240  | 1,232 | 3,729 | 63     | 66.35 | 36.50  | 110.43 | 77     |    |
|                               |                 | 2004        | 2,556  | 1,543 | 4,100 | 54     | 74.91 | 45.22  | 120.16 | 69     |    |
|                               |                 | 2005        | 2,885  | 1,622 | 4,451 | 47     | 83.59 | 46.98  | 128.94 | 65     |    |
|                               |                 | 2006        | 3,204  | 1,633 | 4,769 | 43     | 91.85 | 46.81  | 136.71 | 55     |    |
|                               | 2007            | 3,502       | 1,611  | 5,025 | 39    | 99.28  | 45.67 | 142.46 | 45     |        |    |
|                               |                 | Old (30-64) | 1992   | 6,196 | 1,441 | 11,799 | 55    | 91.91  | 21.37  | 175.02 | 69 |
|                               |                 |             | 1993   | 5,248 | 1,701 | 11,638 | 58    | 76.38  | 24.76  | 169.39 | 80 |
|                               |                 |             | 1994   | 6,104 | 1,956 | 11,207 | 53    | 87.62  | 28.08  | 160.89 | 75 |
|                               |                 |             | 1995   | 5,019 | 2,198 | 10,617 | 60    | 71.06  | 31.12  | 150.31 | 80 |
|                               |                 |             | 1996   | 4,847 | 2,305 | 9,989  | 62    | 67.81  | 32.25  | 139.75 | 80 |
|                               | 1997            |             | 4,639  | 2,257 | 9,274 | 63     | 64.14 | 31.20  | 128.24 | 83     |    |
|                               | 1998            |             | 4,416  | 2,191 | 8,530 | 65     | 60.21 | 29.87  | 116.30 | 84     |    |
|                               | 1999            |             | 4,841  | 3,074 | 7,717 | 66     | 65.05 | 41.32  | 103.71 | 81     |    |
|                               | 2000            |             | 4,042  | 2,073 | 7,312 | 67     | 53.48 | 27.43  | 96.74  | 89     |    |
|                               | 2001            |             | 4,540  | 3,092 | 6,887 | 66     | 58.96 | 40.15  | 89.43  | 81     |    |
|                               | 2002            | 3,799       | 2,050  | 6,496 | 71    | 48.65  | 26.25 | 83.18  | 92     |        |    |
|                               | 2003            | 3,664       | 2,016  | 6,099 | 74    | 46.42  | 25.54 | 77.27  | 93     |        |    |
|                               | 2004            | 3,604       | 2,176  | 5,782 | 75    | 45.16  | 27.26 | 72.44  | 92     |        |    |
|                               | 2005            | 3,579       | 2,011  | 5,520 | 74    | 44.29  | 24.89 | 68.32  | 91     |        |    |
|                               | 2006            | 3,597       | 1,833  | 5,354 | 71    | 44.06  | 22.46 | 65.58  | 89     |        |    |
|                               | 2007            | 3,696       | 1,700  | 5,303 | 67    | 44.70  | 20.56 | 64.15  | 87     |        |    |



| Metropolitan Statistical Area | PWID Population | Year  | Number             | Min   | Max    | Rank  | Rate  | Min   | Max    | Rank  |       |    |
|-------------------------------|-----------------|-------|--------------------|-------|--------|-------|-------|-------|--------|-------|-------|----|
| Cleveland--Lorain--Elyria, OH | Total           | 1992  | 12,187             | 6,699 | 17,766 | 36    | 84.82 | 46.63 | 123.65 | 68    |       |    |
|                               |                 | 1993  | 10,322             | 5,632 | 17,017 | 42    | 71.67 | 39.10 | 118.15 | 74    |       |    |
|                               |                 | 1994  | 11,588             | 6,971 | 16,284 | 41    | 80.31 | 48.32 | 112.86 | 72    |       |    |
|                               |                 | 1995  | 9,988              | 6,041 | 15,567 | 43    | 69.02 | 41.74 | 107.58 | 74    |       |    |
|                               |                 | 1996  | 9,848              | 6,258 | 14,921 | 42    | 67.89 | 43.14 | 102.87 | 75    |       |    |
|                               |                 | 1997  | 9,682              | 6,460 | 14,231 | 42    | 66.78 | 44.56 | 98.16  | 75    |       |    |
|                               |                 | 1998  | 9,581              | 6,678 | 13,754 | 40    | 66.10 | 46.07 | 94.89  | 72    |       |    |
|                               |                 | 1999  | 10,336             | 7,675 | 13,267 | 40    | 71.37 | 53.00 | 91.62  | 72    |       |    |
|                               |                 | 2000  | 9,479              | 6,868 | 13,319 | 41    | 65.46 | 47.43 | 91.98  | 71    |       |    |
|                               |                 | 2001  | 10,379             | 8,209 | 13,389 | 42    | 71.58 | 56.62 | 92.34  | 69    |       |    |
|                               |                 | 2002  | 9,507              | 6,557 | 13,970 | 42    | 65.43 | 45.13 | 96.15  | 73    |       |    |
|                               |                 | 2003  | 9,453              | 6,024 | 14,544 | 44    | 64.97 | 41.40 | 99.95  | 74    |       |    |
|                               |                 | 2004  | 9,384              | 5,505 | 15,149 | 44    | 64.42 | 37.79 | 103.99 | 75    |       |    |
|                               |                 | 2005  | 9,310              | 4,975 | 15,747 | 44    | 63.87 | 34.13 | 108.03 | 73    |       |    |
|                               |                 | 2006  | 9,211              | 4,445 | 16,341 | 46    | 63.28 | 30.53 | 112.26 | 74    |       |    |
|                               |                 | 2007  | 9,120              | 3,935 | 16,939 | 47    | 62.72 | 27.06 | 116.49 | 73    |       |    |
|                               |                 |       | Non-Hispanic White | 1992  | 5,033  | 2,767 | 7,338 | 49    | 44.37  | 24.39 | 64.69 | 82 |
|                               |                 |       |                    | 1993  | 4,051  | 2,210 | 6,678 | 55    | 35.77  | 19.52 | 58.97 | 86 |
|                               |                 |       |                    | 1994  | 4,359  | 2,623 | 6,126 | 52    | 38.56  | 23.20 | 54.19 | 86 |
|                               |                 |       |                    | 1995  | 3,636  | 2,199 | 5,667 | 62    | 32.18  | 19.46 | 50.16 | 89 |
| 1996                          | 3,504           |       |                    | 2,226 | 5,308  | 61    | 31.04 | 19.73 | 47.04  | 89    |       |    |
| 1997                          | 3,401           |       |                    | 2,269 | 4,999  | 63    | 30.25 | 20.18 | 44.46  | 92    |       |    |
| 1998                          | 3,359           |       |                    | 2,341 | 4,821  | 63    | 29.97 | 20.89 | 43.02  | 92    |       |    |
| 1999                          | 3,655           |       |                    | 2,714 | 4,691  | 62    | 32.76 | 24.33 | 42.05  | 93    |       |    |
| 2000                          | 3,416           |       |                    | 2,475 | 4,800  | 62    | 30.75 | 22.28 | 43.20  | 94    |       |    |
| 2001                          | 3,852           |       |                    | 3,047 | 4,969  | 60    | 34.70 | 27.45 | 44.76  | 93    |       |    |
| 2002                          | 3,669           |       |                    | 2,530 | 5,391  | 59    | 33.07 | 22.81 | 48.60  | 95    |       |    |
| 2003                          | 3,826           |       |                    | 2,438 | 5,887  | 57    | 34.54 | 22.01 | 53.14  | 94    |       |    |
| 2004                          | 4,014           |       |                    | 2,354 | 6,480  | 54    | 36.30 | 21.29 | 58.60  | 94    |       |    |
| 2005                          | 4,233           |       |                    | 2,262 | 7,160  | 54    | 38.38 | 20.51 | 64.91  | 91    |       |    |
| 2006                          | 4,471           |       |                    | 2,157 | 7,932  | 54    | 40.71 | 19.65 | 72.23  | 86    |       |    |
| 2007                          | 4,737           | 2,044 | 8,799              | 49    | 43.32  | 18.69 | 80.47 | 86    |        |       |       |    |

| Metropolitan Statistical Area | PWID Population    | Year | Number   | Min   | Max    | Rank  | Rate   | Min    | Max    | Rank   |        |    |
|-------------------------------|--------------------|------|----------|-------|--------|-------|--------|--------|--------|--------|--------|----|
| Cleveland--Lorain--Elyria, OH | Non-Hispanic Black | 1992 | 6,026    | 3,312 | 8,784  | 18    | 243.75 | 133.99 | 355.34 | 62     |        |    |
|                               |                    | 1993 | 5,126    | 2,797 | 8,450  | 19    | 205.01 | 111.86 | 337.97 | 62     |        |    |
|                               |                    | 1994 | 5,735    | 3,451 | 8,060  | 18    | 227.30 | 136.75 | 319.43 | 62     |        |    |
|                               |                    | 1995 | 4,894    | 2,960 | 7,627  | 18    | 192.11 | 116.18 | 299.42 | 65     |        |    |
|                               |                    | 1996 | 4,745    | 3,015 | 7,189  | 19    | 184.83 | 117.45 | 280.04 | 64     |        |    |
|                               |                    | 1997 | 4,559    | 3,042 | 6,701  | 18    | 176.71 | 117.90 | 259.73 | 63     |        |    |
|                               |                    | 1998 | 4,384    | 3,055 | 6,293  | 18    | 169.13 | 117.88 | 242.80 | 61     |        |    |
|                               |                    | 1999 | 4,569    | 3,393 | 5,865  | 20    | 175.62 | 130.41 | 225.42 | 63     |        |    |
|                               |                    | 2000 | 4,027    | 2,918 | 5,659  | 19    | 154.07 | 111.63 | 216.49 | 62     |        |    |
|                               |                    | 2001 | 4,218    | 3,337 | 5,442  | 19    | 160.95 | 127.30 | 207.63 | 62     |        |    |
|                               |                    | 2002 | 3,682    | 2,540 | 5,411  | 20    | 139.61 | 96.30  | 205.16 | 59     |        |    |
|                               |                    | 2003 | 3,478    | 2,216 | 5,351  | 21    | 131.16 | 83.58  | 201.79 | 63     |        |    |
|                               |                    | 2004 | 3,274    | 1,920 | 5,285  | 22    | 122.72 | 71.98  | 198.10 | 63     |        |    |
|                               |                    | 2005 | 3,079    | 1,645 | 5,207  | 24    | 114.64 | 61.26  | 193.90 | 65     |        |    |
|                               |                    | 2006 | 2,892    | 1,395 | 5,130  | 24    | 107.12 | 51.69  | 190.04 | 68     |        |    |
|                               |                    | 2007 | 2,729    | 1,178 | 5,069  | 28    | 100.69 | 43.44  | 187.02 | 73     |        |    |
|                               |                    |      | Hispanic | 1992  | 865    | 475   | 1,260  | 41     | 249.73 | 137.28 | 364.05 | 24 |
|                               |                    |      |          | 1993  | 851    | 464   | 1,403  | 42     | 234.59 | 127.99 | 386.73 | 26 |
|                               |                    |      |          | 1994  | 1,089  | 655   | 1,530  | 39     | 289.55 | 174.20 | 406.91 | 14 |
|                               |                    |      |          | 1995  | 1,049  | 634   | 1,635  | 39     | 267.25 | 161.63 | 416.54 | 15 |
| 1996                          | 1,135              |      |          | 721   | 1,720  | 39    | 277.90 | 176.59 | 421.05 | 14     |        |    |
| 1997                          | 1,203              |      |          | 803   | 1,769  | 39    | 285.22 | 190.30 | 419.22 | 13     |        |    |
| 1998                          | 1,262              |      |          | 880   | 1,812  | 39    | 288.76 | 201.26 | 414.54 | 13     |        |    |
| 1999                          | 1,420              |      |          | 1,054 | 1,822  | 39    | 314.15 | 233.28 | 403.24 | 11     |        |    |
| 2000                          | 1,336              |      |          | 968   | 1,878  | 39    | 283.16 | 205.15 | 397.88 | 12     |        |    |
| 2001                          | 1,479              |      |          | 1,170 | 1,909  | 39    | 303.23 | 239.84 | 391.17 | 12     |        |    |
| 2002                          | 1,351              |      |          | 932   | 1,985  | 41    | 268.87 | 185.45 | 395.10 | 12     |        |    |
| 2003                          | 1,321              |      |          | 842   | 2,032  | 42    | 255.67 | 162.92 | 393.34 | 13     |        |    |
| 2004                          | 1,272              |      |          | 746   | 2,054  | 42    | 240.43 | 141.03 | 388.13 | 14     |        |    |
| 2005                          | 1,209              |      |          | 646   | 2,045  | 46    | 222.86 | 119.09 | 376.95 | 16     |        |    |
| 2006                          | 1,133              |      |          | 547   | 2,011  | 48    | 204.61 | 98.74  | 363.00 | 18     |        |    |
| 2007                          | 1,052              | 454  | 1,954    | 48    | 183.95 | 79.36 | 341.67 | 18     |        |        |        |    |

| Metropolitan Statistical Area | PWID Population | Year   | Number | Min    | Max    | Rank  | Rate   | Min    | Max    | Rank  |    |
|-------------------------------|-----------------|--------|--------|--------|--------|-------|--------|--------|--------|-------|----|
| Cleveland--Lorain--Elyria, OH | Male            | 1992   | 8,208  | 4,512  | 11,965 | 37    | 118.05 | 64.89  | 172.09 | 62    |    |
|                               |                 | 1993   | 7,007  | 3,823  | 11,552 | 40    | 100.43 | 54.79  | 165.55 | 71    |    |
|                               |                 | 1994   | 7,902  | 4,754  | 11,104 | 38    | 112.97 | 67.96  | 158.76 | 63    |    |
|                               |                 | 1995   | 6,821  | 4,125  | 10,631 | 41    | 97.15  | 58.76  | 151.42 | 68    |    |
|                               |                 | 1996   | 6,717  | 4,268  | 10,178 | 40    | 95.40  | 60.62  | 144.55 | 71    |    |
|                               |                 | 1997   | 6,581  | 4,391  | 9,673  | 40    | 93.48  | 62.37  | 137.40 | 68    |    |
|                               |                 | 1998   | 6,478  | 4,515  | 9,299  | 38    | 91.98  | 64.11  | 132.05 | 68    |    |
|                               |                 | 1999   | 6,940  | 5,153  | 8,908  | 37    | 98.58  | 73.20  | 126.54 | 65    |    |
|                               |                 | 2000   | 6,312  | 4,573  | 8,869  | 40    | 89.61  | 64.93  | 125.92 | 68    |    |
|                               |                 | 2001   | 6,848  | 5,416  | 8,834  | 38    | 97.03  | 76.75  | 125.17 | 65    |    |
|                               |                 | 2002   | 6,211  | 4,284  | 9,127  | 41    | 87.73  | 60.51  | 128.92 | 68    |    |
|                               |                 | 2003   | 6,115  | 3,897  | 9,408  | 41    | 86.11  | 54.87  | 132.47 | 67    |    |
|                               |                 | 2004   | 6,011  | 3,526  | 9,704  | 41    | 84.53  | 49.58  | 136.45 | 68    |    |
|                               |                 | 2005   | 5,909  | 3,158  | 9,995  | 42    | 82.96  | 44.33  | 140.32 | 69    |    |
|                               | 2006            | 5,800  | 2,799  | 10,289 | 46     | 81.49 | 39.32  | 144.56 | 72     |       |    |
|                               | 2007            | 5,706  | 2,462  | 10,598 | 46     | 80.21 | 34.60  | 148.98 | 72     |       |    |
|                               |                 | Female | 1992   | 4,097  | 2,252  | 5,972 | 39     | 55.25  | 30.37  | 80.54 | 69 |
|                               |                 |        | 1993   | 3,406  | 1,858  | 5,615 | 39     | 45.87  | 25.03  | 75.62 | 77 |
|                               |                 |        | 1994   | 3,783  | 2,276  | 5,316 | 40     | 50.88  | 30.61  | 71.51 | 79 |
|                               |                 |        | 1995   | 3,248  | 1,964  | 5,062 | 41     | 43.60  | 26.37  | 67.95 | 81 |
|                               |                 |        | 1996   | 3,210  | 2,040  | 4,863 | 43     | 43.00  | 27.33  | 65.15 | 82 |
|                               |                 |        | 1997   | 3,179  | 2,121  | 4,672 | 44     | 42.62  | 28.44  | 62.65 | 81 |
|                               |                 |        | 1998   | 3,182  | 2,217  | 4,567 | 44     | 42.69  | 29.75  | 61.28 | 81 |
|                               |                 |        | 1999   | 3,482  | 2,586  | 4,469 | 41     | 46.79  | 34.74  | 60.06 | 83 |
|                               |                 |        | 2000   | 3,246  | 2,352  | 4,561 | 43     | 43.65  | 31.62  | 61.33 | 79 |
|                               |                 |        | 2001   | 3,617  | 2,861  | 4,666 | 43     | 48.60  | 38.44  | 62.69 | 80 |
|                               | 2002            |        | 3,371  | 2,325  | 4,954  | 43    | 45.25  | 31.21  | 66.50  | 78    |    |
|                               | 2003            |        | 3,409  | 2,172  | 5,245  | 44    | 45.76  | 29.16  | 70.40  | 77    |    |
|                               | 2004            | 3,436  | 2,015  | 5,546  | 44     | 46.07 | 27.02  | 74.38  | 79     |       |    |
|                               | 2005            | 3,451  | 1,844  | 5,838  | 44     | 46.31 | 24.75  | 78.32  | 79     |       |    |
|                               | 2006            | 3,447  | 1,663  | 6,114  | 42     | 46.33 | 22.36  | 82.20  | 78     |       |    |
|                               | 2007            | 3,430  | 1,480  | 6,372  | 44     | 46.18 | 19.93  | 85.78  | 78     |       |    |

| Metropolitan Statistical Area | PWID Population | Year  | Number      | Min   | Max    | Rank  | Rate   | Min   | Max    | Rank  |        |    |
|-------------------------------|-----------------|-------|-------------|-------|--------|-------|--------|-------|--------|-------|--------|----|
| Cleveland--Lorain--Elyria, OH | Young (15-29)   | 1992  | 1,935       | 1,063 | 2,820  | 57    | 43.06  | 23.67 | 62.77  | 84    |        |    |
|                               |                 | 1993  | 1,631       | 890   | 2,689  | 60    | 36.85  | 20.11 | 60.75  | 86    |        |    |
|                               |                 | 1994  | 1,842       | 1,108 | 2,588  | 58    | 42.23  | 25.41 | 59.34  | 84    |        |    |
|                               |                 | 1995  | 1,613       | 975   | 2,513  | 64    | 37.30  | 22.56 | 58.14  | 87    |        |    |
|                               |                 | 1996  | 1,630       | 1,036 | 2,469  | 63    | 37.96  | 24.12 | 57.51  | 86    |        |    |
|                               |                 | 1997  | 1,656       | 1,105 | 2,434  | 65    | 38.92  | 25.97 | 57.20  | 87    |        |    |
|                               |                 | 1998  | 1,707       | 1,190 | 2,451  | 63    | 40.49  | 28.22 | 58.13  | 87    |        |    |
|                               |                 | 1999  | 1,931       | 1,434 | 2,479  | 62    | 46.50  | 34.53 | 59.68  | 85    |        |    |
|                               |                 | 2000  | 1,869       | 1,354 | 2,626  | 62    | 45.58  | 33.02 | 64.04  | 85    |        |    |
|                               |                 | 2001  | 2,170       | 1,717 | 2,800  | 60    | 53.68  | 42.46 | 69.25  | 83    |        |    |
|                               |                 | 2002  | 2,118       | 1,461 | 3,112  | 61    | 52.60  | 36.28 | 77.30  | 82    |        |    |
|                               |                 | 2003  | 2,251       | 1,435 | 3,464  | 62    | 55.82  | 35.57 | 85.87  | 83    |        |    |
|                               |                 | 2004  | 2,396       | 1,405 | 3,867  | 59    | 59.09  | 34.66 | 95.39  | 84    |        |    |
|                               |                 | 2005  | 2,552       | 1,364 | 4,316  | 57    | 62.68  | 33.49 | 106.01 | 82    |        |    |
|                               |                 | 2006  | 2,712       | 1,309 | 4,812  | 54    | 66.45  | 32.06 | 117.88 | 82    |        |    |
|                               |                 | 2007  | 2,885       | 1,245 | 5,358  | 53    | 70.41  | 30.38 | 130.77 | 76    |        |    |
|                               |                 |       | Old (30-64) | 1992  | 10,432 | 5,734 | 15,207 | 34    | 105.64 | 58.07 | 154.00 | 58 |
|                               |                 |       |             | 1993  | 8,805  | 4,804 | 14,515 | 37    | 88.26  | 48.15 | 145.49 | 67 |
|                               |                 |       |             | 1994  | 9,847  | 5,924 | 13,839 | 37    | 97.82  | 58.85 | 137.47 | 62 |
|                               |                 |       |             | 1995  | 8,453  | 5,112 | 13,174 | 38    | 83.30  | 50.38 | 129.83 | 71 |
| 1996                          | 8,293           |       |             | 5,270 | 12,565 | 37    | 81.21  | 51.61 | 123.05 | 71    |        |    |
| 1997                          | 8,105           |       |             | 5,407 | 11,912 | 37    | 79.13  | 52.79 | 116.30 | 69    |        |    |
| 1998                          | 7,960           |       |             | 5,548 | 11,427 | 37    | 77.44  | 53.97 | 111.16 | 68    |        |    |
| 1999                          | 8,507           |       |             | 6,317 | 10,919 | 37    | 82.37  | 61.16 | 105.73 | 65    |        |    |
| 2000                          | 7,710           |       |             | 5,586 | 10,833 | 37    | 74.27  | 53.81 | 104.36 | 64    |        |    |
| 2001                          | 8,319           |       |             | 6,580 | 10,731 | 38    | 79.56  | 62.93 | 102.64 | 63    |        |    |
| 2002                          | 7,484           |       |             | 5,162 | 10,998 | 38    | 71.25  | 49.14 | 104.70 | 63    |        |    |
| 2003                          | 7,280           |       |             | 4,639 | 11,200 | 38    | 69.22  | 44.11 | 106.49 | 64    |        |    |
| 2004                          | 7,034           |       |             | 4,126 | 11,356 | 38    | 66.91  | 39.24 | 108.01 | 64    |        |    |
| 2005                          | 6,751           |       |             | 3,607 | 11,418 | 37    | 64.26  | 34.34 | 108.69 | 66    |        |    |
| 2006                          | 6,409           |       |             | 3,093 | 11,371 | 38    | 61.19  | 29.53 | 108.56 | 69    |        |    |
| 2007                          | 6,027           | 2,600 | 11,194      | 43    | 57.70  | 24.90 | 107.18 | 68    |        |       |        |    |

| Metropolitan Statistical Area | PWID Population | Year  | Number             | Min   | Max    | Rank  | Rate  | Min   | Max    | Rank  |       |    |
|-------------------------------|-----------------|-------|--------------------|-------|--------|-------|-------|-------|--------|-------|-------|----|
| Columbus, OH                  | Total           | 1992  | 9,090              | 4,622 | 15,191 | 50    | 94.87 | 48.24 | 158.54 | 58    |       |    |
|                               |                 | 1993  | 7,871              | 4,458 | 14,733 | 50    | 81.05 | 45.90 | 151.71 | 65    |       |    |
|                               |                 | 1994  | 8,905              | 4,793 | 14,251 | 50    | 90.69 | 48.82 | 145.15 | 61    |       |    |
|                               |                 | 1995  | 7,726              | 4,562 | 13,777 | 50    | 77.72 | 45.90 | 138.59 | 68    |       |    |
|                               |                 | 1996  | 7,585              | 4,578 | 13,299 | 50    | 75.65 | 45.66 | 132.65 | 67    |       |    |
|                               |                 | 1997  | 7,390              | 4,099 | 12,853 | 54    | 72.86 | 40.42 | 126.71 | 68    |       |    |
|                               |                 | 1998  | 7,196              | 3,556 | 12,432 | 56    | 69.89 | 34.54 | 120.75 | 68    |       |    |
|                               |                 | 1999  | 7,761              | 3,078 | 11,979 | 53    | 74.37 | 29.50 | 114.79 | 66    |       |    |
|                               |                 | 2000  | 6,979              | 2,832 | 11,907 | 57    | 65.85 | 26.72 | 112.35 | 70    |       |    |
|                               |                 | 2001  | 7,733              | 2,901 | 11,802 | 53    | 72.01 | 27.02 | 109.90 | 68    |       |    |
|                               |                 | 2002  | 7,125              | 3,208 | 11,925 | 52    | 65.67 | 29.57 | 109.91 | 72    |       |    |
|                               |                 | 2003  | 7,295              | 3,648 | 12,068 | 53    | 66.45 | 33.23 | 109.92 | 72    |       |    |
|                               |                 | 2004  | 7,465              | 4,061 | 12,259 | 52    | 67.34 | 36.63 | 110.57 | 70    |       |    |
|                               |                 | 2005  | 7,575              | 4,223 | 12,468 | 52    | 67.57 | 37.68 | 111.23 | 71    |       |    |
|                               |                 | 2006  | 7,606              | 4,001 | 12,745 | 52    | 67.08 | 35.29 | 112.41 | 71    |       |    |
|                               |                 | 2007  | 7,616              | 3,732 | 13,013 | 51    | 66.48 | 32.58 | 113.60 | 71    |       |    |
|                               |                 |       | Non-Hispanic White | 1992  | 4,495  | 2,285 | 7,511 | 53    | 55.31  | 28.12 | 92.43 | 71 |
|                               |                 |       |                    | 1993  | 3,830  | 2,169 | 7,169 | 56    | 46.71  | 26.46 | 87.44 | 73 |
|                               |                 |       |                    | 1994  | 4,279  | 2,303 | 6,848 | 53    | 51.84  | 27.90 | 82.96 | 73 |
|                               |                 |       |                    | 1995  | 3,682  | 2,174 | 6,565 | 59    | 44.25  | 26.13 | 78.91 | 77 |
| 1996                          | 3,601           |       |                    | 2,173 | 6,314  | 60    | 43.14 | 26.04 | 75.64  | 77    |       |    |
| 1997                          | 3,513           |       |                    | 1,949 | 6,111  | 60    | 41.79 | 23.19 | 72.69  | 80    |       |    |
| 1998                          | 3,446           |       |                    | 1,703 | 5,953  | 62    | 40.55 | 20.04 | 70.06  | 80    |       |    |
| 1999                          | 3,766           |       |                    | 1,494 | 5,813  | 59    | 43.95 | 17.43 | 67.84  | 78    |       |    |
| 2000                          | 3,453           |       |                    | 1,401 | 5,892  | 59    | 39.91 | 16.19 | 68.09  | 81    |       |    |
| 2001                          | 3,926           |       |                    | 1,473 | 5,992  | 58    | 45.04 | 16.90 | 68.75  | 81    |       |    |
| 2002                          | 3,735           |       |                    | 1,682 | 6,252  | 58    | 42.64 | 19.20 | 71.36  | 81    |       |    |
| 2003                          | 3,972           |       |                    | 1,986 | 6,570  | 54    | 45.05 | 22.53 | 74.52  | 81    |       |    |
| 2004                          | 4,242           |       |                    | 2,307 | 6,966  | 48    | 47.86 | 26.04 | 78.60  | 78    |       |    |
| 2005                          | 4,511           |       |                    | 2,515 | 7,425  | 47    | 50.56 | 28.19 | 83.22  | 76    |       |    |
| 2006                          | 4,761           |       |                    | 2,505 | 7,978  | 45    | 53.00 | 27.88 | 88.81  | 76    |       |    |
| 2007                          | 5,019           | 2,460 | 8,577              | 46    | 55.51  | 27.21 | 94.86 | 74    |        |       |       |    |

| Metropolitan Statistical Area | PWID Population    | Year | Number   | Min   | Max   | Rank  | Rate   | Min    | Max    | Rank  |        |    |
|-------------------------------|--------------------|------|----------|-------|-------|-------|--------|--------|--------|-------|--------|----|
| Columbus, OH                  | Non-Hispanic Black | 1992 | 4,153    | 2,111 | 6,940 | 26    | 359.59 | 182.84 | 600.92 | 36    |        |    |
|                               |                    | 1993 | 3,617    | 2,049 | 6,771 | 27    | 304.30 | 172.35 | 569.59 | 43    |        |    |
|                               |                    | 1994 | 4,096    | 2,205 | 6,556 | 26    | 336.65 | 181.21 | 538.79 | 36    |        |    |
|                               |                    | 1995 | 3,539    | 2,090 | 6,310 | 27    | 283.19 | 167.23 | 504.97 | 42    |        |    |
|                               |                    | 1996 | 3,440    | 2,077 | 6,033 | 26    | 269.33 | 162.56 | 472.26 | 41    |        |    |
|                               |                    | 1997 | 3,301    | 1,831 | 5,741 | 25    | 252.73 | 140.21 | 439.57 | 41    |        |    |
|                               |                    | 1998 | 3,146    | 1,555 | 5,435 | 25    | 235.34 | 116.31 | 406.59 | 39    |        |    |
|                               |                    | 1999 | 3,299    | 1,308 | 5,092 | 24    | 241.50 | 95.78  | 372.76 | 32    |        |    |
|                               |                    | 2000 | 2,864    | 1,162 | 4,887 | 25    | 204.25 | 82.87  | 348.49 | 40    |        |    |
|                               |                    | 2001 | 3,041    | 1,141 | 4,642 | 24    | 211.11 | 79.21  | 322.21 | 33    |        |    |
|                               |                    | 2002 | 2,664    | 1,200 | 4,459 | 25    | 180.67 | 81.36  | 302.38 | 41    |        |    |
|                               |                    | 2003 | 2,571    | 1,286 | 4,254 | 28    | 169.95 | 84.99  | 281.14 | 42    |        |    |
|                               |                    | 2004 | 2,459    | 1,338 | 4,039 | 28    | 159.00 | 86.49  | 261.09 | 48    |        |    |
|                               |                    | 2005 | 2,313    | 1,289 | 3,807 | 32    | 146.25 | 81.54  | 240.73 | 53    |        |    |
|                               |                    | 2006 | 2,135    | 1,123 | 3,577 | 32    | 132.01 | 69.44  | 221.21 | 58    |        |    |
|                               |                    | 2007 | 1,953    | 957   | 3,336 | 36    | 118.37 | 58.01  | 202.26 | 64    |        |    |
|                               |                    |      | Hispanic | 1992  | 131   | 67    | 220    | 72     | 137.91 | 70.12 | 230.46 | 49 |
|                               |                    |      |          | 1993  | 113   | 64    | 211    | 74     | 107.30 | 60.77 | 200.84 | 53 |
|                               |                    |      |          | 1994  | 127   | 68    | 203    | 75     | 111.14 | 59.83 | 177.88 | 52 |
|                               |                    |      |          | 1995  | 110   | 65    | 196    | 76     | 87.50  | 51.67 | 156.03 | 55 |
| 1996                          | 107                |      |          | 65    | 188   | 78    | 78.12  | 47.15  | 136.98 | 58    |        |    |
| 1997                          | 104                |      |          | 58    | 181   | 78    | 69.22  | 38.40  | 120.38 | 61    |        |    |
| 1998                          | 101                |      |          | 50    | 174   | 77    | 61.14  | 30.22  | 105.64 | 63    |        |    |
| 1999                          | 108                |      |          | 43    | 167   | 77    | 59.46  | 23.58  | 91.78  | 66    |        |    |
| 2000                          | 96                 |      |          | 39    | 164   | 80    | 47.95  | 19.46  | 81.81  | 68    |        |    |
| 2001                          | 105                |      |          | 39    | 160   | 79    | 47.72  | 17.90  | 72.83  | 71    |        |    |
| 2002                          | 95                 |      |          | 43    | 158   | 81    | 40.39  | 18.19  | 67.59  | 73    |        |    |
| 2003                          | 95                 |      |          | 47    | 156   | 82    | 37.74  | 18.87  | 62.43  | 73    |        |    |
| 2004                          | 94                 |      |          | 51    | 154   | 84    | 35.40  | 19.26  | 58.13  | 74    |        |    |
| 2005                          | 92                 |      |          | 51    | 152   | 85    | 33.02  | 18.41  | 54.36  | 76    |        |    |
| 2006                          | 89                 | 47   | 150      | 87    | 30.25 | 15.91 | 50.69  | 79     |        |       |        |    |
| 2007                          | 86                 | 42   | 146      | 87    | 27.68 | 13.56 | 47.29  | 83     |        |       |        |    |

| Metropolitan Statistical Area | PWID Population | Year   | Number | Min   | Max   | Rank  | Rate   | Min    | Max    | Rank   |    |
|-------------------------------|-----------------|--------|--------|-------|-------|-------|--------|--------|--------|--------|----|
| Columbus, OH                  | Male            | 1992   | 5,673  | 2,884 | 9,480 | 52    | 119.02 | 60.52  | 198.91 | 61     |    |
|                               |                 | 1993   | 4,878  | 2,763 | 9,130 | 51    | 100.94 | 57.17  | 188.94 | 68     |    |
|                               |                 | 1994   | 5,490  | 2,955 | 8,787 | 51    | 112.42 | 60.51  | 179.92 | 64     |    |
|                               |                 | 1995   | 4,748  | 2,804 | 8,466 | 52    | 95.96  | 56.67  | 171.11 | 72     |    |
|                               |                 | 1996   | 4,651  | 2,807 | 8,156 | 56    | 93.21  | 56.26  | 163.43 | 73     |    |
|                               |                 | 1997   | 4,527  | 2,511 | 7,874 | 58    | 89.73  | 49.78  | 156.07 | 73     |    |
|                               |                 | 1998   | 4,407  | 2,178 | 7,614 | 57    | 86.05  | 42.53  | 148.67 | 74     |    |
|                               |                 | 1999   | 4,753  | 1,885 | 7,337 | 56    | 91.57  | 36.32  | 141.34 | 72     |    |
|                               |                 | 2000   | 4,275  | 1,734 | 7,293 | 59    | 81.04  | 32.88  | 138.27 | 72     |    |
|                               |                 | 2001   | 4,735  | 1,777 | 7,227 | 53    | 88.56  | 33.23  | 135.17 | 72     |    |
|                               |                 | 2002   | 4,360  | 1,963 | 7,297 | 57    | 80.70  | 36.34  | 135.06 | 71     |    |
|                               |                 | 2003   | 4,455  | 2,228 | 7,371 | 55    | 81.39  | 40.70  | 134.64 | 72     |    |
|                               |                 | 2004   | 4,545  | 2,472 | 7,464 | 55    | 82.18  | 44.70  | 134.95 | 71     |    |
|                               |                 | 2005   | 4,590  | 2,559 | 7,555 | 56    | 81.99  | 45.72  | 134.97 | 72     |    |
|                               | 2006            | 4,577  | 2,408  | 7,670 | 56    | 80.73 | 42.47  | 135.28 | 73     |        |    |
|                               | 2007            | 4,540  | 2,225  | 7,757 | 56    | 79.16 | 38.80  | 135.26 | 73     |        |    |
|                               |                 | Female | 1992   | 3,535 | 1,797 | 5,908 | 41     | 73.41  | 37.33  | 122.67 | 47 |
|                               |                 |        | 1993   | 3,092 | 1,751 | 5,788 | 44     | 63.38  | 35.89  | 118.63 | 55 |
|                               |                 |        | 1994   | 3,524 | 1,897 | 5,641 | 43     | 71.43  | 38.45  | 114.32 | 52 |
|                               |                 |        | 1995   | 3,074 | 1,815 | 5,482 | 46     | 61.57  | 36.36  | 109.79 | 57 |
|                               |                 |        | 1996   | 3,028 | 1,828 | 5,310 | 48     | 60.14  | 36.30  | 105.46 | 59 |
|                               |                 |        | 1997   | 2,956 | 1,640 | 5,142 | 48     | 57.99  | 32.17  | 100.85 | 60 |
|                               |                 |        | 1998   | 2,881 | 1,424 | 4,977 | 49     | 55.67  | 27.52  | 96.19  | 66 |
|                               |                 |        | 1999   | 3,107 | 1,232 | 4,795 | 51     | 59.24  | 23.50  | 91.44  | 62 |
|                               |                 |        | 2000   | 2,792 | 1,133 | 4,764 | 52     | 52.45  | 21.28  | 89.48  | 67 |
|                               |                 |        | 2001   | 3,091 | 1,160 | 4,718 | 51     | 57.34  | 21.51  | 87.52  | 65 |
|                               | 2002            |        | 2,847  | 1,282 | 4,765 | 51    | 52.26  | 23.53  | 87.47  | 68     |    |
|                               | 2003            |        | 2,914  | 1,457 | 4,821 | 49    | 52.95  | 26.48  | 87.59  | 67     |    |
|                               | 2004            | 2,985  | 1,624  | 4,901 | 51    | 53.72 | 29.22  | 88.22  | 66     |        |    |
|                               | 2005            | 3,034  | 1,692  | 4,995 | 48    | 54.07 | 30.14  | 88.99  | 66     |        |    |
|                               | 2006            | 3,058  | 1,608  | 5,124 | 48    | 53.94 | 28.37  | 90.38  | 65     |        |    |
|                               | 2007            | 3,078  | 1,509  | 5,260 | 51    | 53.81 | 26.37  | 91.95  | 64     |        |    |

| Metropolitan Statistical Area | PWID Population | Year        | Number | Min   | Max   | Rank   | Rate  | Min    | Max    | Rank   |    |
|-------------------------------|-----------------|-------------|--------|-------|-------|--------|-------|--------|--------|--------|----|
| Columbus, OH                  | Young (15-29)   | 1992        | 1,837  | 934   | 3,070 | 60     | 53.03 | 26.96  | 88.62  | 76     |    |
|                               |                 | 1993        | 1,601  | 907   | 2,997 | 62     | 46.45 | 26.31  | 86.94  | 77     |    |
|                               |                 | 1994        | 1,845  | 993   | 2,952 | 57     | 53.76 | 28.94  | 86.04  | 72     |    |
|                               |                 | 1995        | 1,648  | 973   | 2,938 | 62     | 47.96 | 28.32  | 85.52  | 77     |    |
|                               |                 | 1996        | 1,681  | 1,015 | 2,947 | 62     | 48.91 | 29.52  | 85.76  | 72     |    |
|                               |                 | 1997        | 1,717  | 952   | 2,986 | 62     | 49.68 | 27.56  | 86.40  | 73     |    |
|                               |                 | 1998        | 1,765  | 872   | 3,050 | 62     | 50.73 | 25.07  | 87.64  | 76     |    |
|                               |                 | 1999        | 2,023  | 802   | 3,122 | 61     | 57.94 | 22.98  | 89.43  | 76     |    |
|                               |                 | 2000        | 1,942  | 788   | 3,314 | 60     | 55.39 | 22.47  | 94.50  | 75     |    |
|                               |                 | 2001        | 2,307  | 866   | 3,521 | 57     | 65.81 | 24.69  | 100.45 | 74     |    |
|                               |                 | 2002        | 2,284  | 1,029 | 3,823 | 55     | 65.10 | 29.31  | 108.95 | 73     |    |
|                               |                 | 2003        | 2,517  | 1,259 | 4,163 | 51     | 71.12 | 35.57  | 117.65 | 69     |    |
|                               |                 | 2004        | 2,772  | 1,508 | 4,551 | 48     | 77.89 | 42.37  | 127.90 | 65     |    |
|                               |                 | 2005        | 3,023  | 1,685 | 4,975 | 45     | 84.60 | 47.17  | 139.26 | 61     |    |
|                               |                 | 2006        | 3,255  | 1,712 | 5,454 | 42     | 90.72 | 47.72  | 152.02 | 56     |    |
|                               | 2007            | 3,483       | 1,707  | 5,952 | 40    | 96.73  | 47.41 | 165.28 | 48     |        |    |
|                               |                 | Old (30-64) | 1992   | 7,422 | 3,774 | 12,403 | 44    | 121.31 | 61.68  | 202.72 | 48 |
|                               |                 |             | 1993   | 6,370 | 3,608 | 11,924 | 44    | 101.69 | 57.60  | 190.35 | 54 |
|                               |                 |             | 1994   | 7,143 | 3,845 | 11,433 | 45    | 111.85 | 60.21  | 179.00 | 51 |
|                               |                 |             | 1995   | 6,141 | 3,626 | 10,950 | 47    | 94.39  | 55.74  | 168.32 | 61 |
|                               |                 |             | 1996   | 5,967 | 3,602 | 10,463 | 48    | 90.56  | 54.66  | 158.79 | 60 |
|                               | 1997            |             | 5,745  | 3,187 | 9,992 | 49     | 85.90 | 47.66  | 149.41 | 62     |    |
|                               | 1998            |             | 5,516  | 2,726 | 9,530 | 52     | 80.93 | 39.99  | 139.81 | 63     |    |
|                               | 1999            | 5,847       | 2,319  | 9,025 | 52    | 84.20  | 33.40 | 129.97 | 63     |        |    |
|                               | 2000            | 5,148       | 2,089  | 8,783 | 57    | 72.59  | 29.45 | 123.86 | 66     |        |    |
|                               | 2001            | 5,557       | 2,085  | 8,481 | 54    | 76.83  | 28.83 | 117.26 | 66     |        |    |
|                               | 2002            | 4,958       | 2,233  | 8,298 | 55    | 67.54  | 30.42 | 113.05 | 67     |        |    |
|                               | 2003            | 4,878       | 2,439  | 8,069 | 54    | 65.57  | 32.79 | 108.46 | 66     |        |    |
|                               | 2004            | 4,751       | 2,584  | 7,802 | 54    | 63.11  | 34.33 | 103.64 | 71     |        |    |
|                               | 2005            | 4,533       | 2,527  | 7,461 | 57    | 59.35  | 33.09 | 97.70  | 74     |        |    |
|                               | 2006            | 4,214       | 2,217  | 7,062 | 59    | 54.37  | 28.60 | 91.11  | 75     |        |    |
|                               | 2007            | 3,833       | 1,878  | 6,549 | 63    | 48.80  | 23.91 | 83.38  | 79     |        |    |



| Metropolitan Statistical Area | PWID Population | Year  | Number             | Min    | Max    | Rank  | Rate   | Min   | Max    | Rank  |        |    |
|-------------------------------|-----------------|-------|--------------------|--------|--------|-------|--------|-------|--------|-------|--------|----|
| Dallas, TX                    | Total           | 1992  | 25,683             | 10,798 | 49,824 | 11    | 133.37 | 56.07 | 258.73 | 42    |        |    |
|                               |                 | 1993  | 21,586             | 8,575  | 49,320 | 18    | 109.56 | 43.53 | 250.34 | 47    |        |    |
|                               |                 | 1994  | 25,988             | 11,292 | 48,159 | 10    | 128.69 | 55.92 | 238.47 | 40    |        |    |
|                               |                 | 1995  | 22,383             | 11,455 | 46,740 | 16    | 107.76 | 55.15 | 225.03 | 46    |        |    |
|                               |                 | 1996  | 22,142             | 11,949 | 42,850 | 16    | 103.54 | 55.88 | 200.38 | 48    |        |    |
|                               |                 | 1997  | 21,702             | 12,361 | 37,943 | 16    | 98.03  | 55.84 | 171.39 | 49    |        |    |
|                               |                 | 1998  | 21,348             | 12,865 | 33,819 | 18    | 93.25  | 56.20 | 147.72 | 51    |        |    |
|                               |                 | 1999  | 24,165             | 13,358 | 33,316 | 11    | 102.31 | 56.55 | 141.05 | 49    |        |    |
|                               |                 | 2000  | 22,700             | 12,810 | 36,715 | 16    | 93.30  | 52.65 | 150.90 | 53    |        |    |
|                               |                 | 2001  | 28,578             | 14,151 | 42,085 | 10    | 113.63 | 56.26 | 167.33 | 44    |        |    |
|                               |                 | 2002  | 25,599             | 9,507  | 47,895 | 13    | 99.55  | 36.97 | 186.25 | 44    |        |    |
|                               |                 | 2003  | 26,977             | 8,509  | 53,179 | 11    | 103.04 | 32.50 | 203.11 | 42    |        |    |
|                               |                 | 2004  | 28,026             | 8,020  | 56,538 | 10    | 105.06 | 30.07 | 211.95 | 40    |        |    |
|                               |                 | 2005  | 28,707             | 7,560  | 58,146 | 10    | 105.26 | 27.72 | 213.20 | 40    |        |    |
|                               |                 | 2006  | 29,550             | 7,145  | 60,087 | 9     | 105.38 | 25.48 | 214.27 | 38    |        |    |
|                               |                 | 2007  | 30,216             | 6,718  | 61,499 | 9     | 105.27 | 23.40 | 214.26 | 36    |        |    |
|                               |                 |       | Non-Hispanic White | 1992   | 16,030 | 6,740 | 31,098 | 7     | 125.53 | 52.78 | 243.53 | 25 |
|                               |                 |       |                    | 1993   | 12,998 | 5,164 | 29,697 | 12    | 101.17 | 40.19 | 231.15 | 35 |
|                               |                 |       |                    | 1994   | 15,265 | 6,633 | 28,288 | 7     | 117.86 | 51.21 | 218.42 | 25 |
|                               |                 |       |                    | 1995   | 12,953 | 6,629 | 27,048 | 11    | 98.99  | 50.66 | 206.70 | 34 |
| 1996                          | 12,726          |       |                    | 6,867  | 24,627 | 11    | 96.25  | 51.94 | 186.28 | 36    |        |    |
| 1997                          | 12,461          |       |                    | 7,098  | 21,786 | 12    | 92.73  | 52.82 | 162.12 | 39    |        |    |
| 1998                          | 12,291          |       |                    | 7,407  | 19,471 | 12    | 90.02  | 54.25 | 142.61 | 40    |        |    |
| 1999                          | 13,970          |       |                    | 7,723  | 19,260 | 8     | 100.99 | 55.83 | 139.24 | 31    |        |    |
| 2000                          | 13,168          |       |                    | 7,431  | 21,297 | 9     | 93.97  | 53.03 | 151.99 | 35    |        |    |
| 2001                          | 16,586          |       |                    | 8,212  | 24,425 | 6     | 116.45 | 57.66 | 171.49 | 22    |        |    |
| 2002                          | 14,791          |       |                    | 5,493  | 27,674 | 8     | 103.13 | 38.30 | 192.96 | 29    |        |    |
| 2003                          | 15,409          |       |                    | 4,860  | 30,375 | 8     | 107.07 | 33.77 | 211.06 | 28    |        |    |
| 2004                          | 15,676          |       |                    | 4,486  | 31,623 | 8     | 108.36 | 31.01 | 218.59 | 27    |        |    |
| 2005                          | 15,533          |       |                    | 4,091  | 31,462 | 9     | 106.64 | 28.08 | 215.99 | 28    |        |    |
| 2006                          | 15,231          | 3,683 | 30,971             | 11     | 103.56 | 25.04 | 210.58 | 28    |        |       |        |    |
| 2007                          | 14,551          | 3,235 | 29,615             | 12     | 98.08  | 21.81 | 199.63 | 37    |        |       |        |    |

| Metropolitan Statistical Area | PWID Population    | Year     | Number | Min    | Max    | Rank   | Rate   | Min    | Max    | Rank   |    |
|-------------------------------|--------------------|----------|--------|--------|--------|--------|--------|--------|--------|--------|----|
| Dallas, TX                    | Non-Hispanic Black | 1992     | 6,736  | 2,832  | 13,068 | 15     | 232.38 | 97.70  | 450.82 | 66     |    |
|                               |                    | 1993     | 6,032  | 2,396  | 13,782 | 17     | 203.14 | 80.70  | 464.15 | 63     |    |
|                               |                    | 1994     | 7,492  | 3,255  | 13,884 | 14     | 245.50 | 106.67 | 454.95 | 58     |    |
|                               |                    | 1995     | 6,491  | 3,322  | 13,555 | 14     | 206.17 | 105.51 | 430.52 | 56     |    |
|                               |                    | 1996     | 6,335  | 3,419  | 12,260 | 15     | 195.88 | 105.70 | 379.07 | 56     |    |
|                               |                    | 1997     | 6,041  | 3,441  | 10,562 | 15     | 180.90 | 103.04 | 316.27 | 60     |    |
|                               |                    | 1998     | 5,732  | 3,454  | 9,080  | 16     | 166.75 | 100.49 | 264.16 | 63     |    |
|                               |                    | 1999     | 6,239  | 3,449  | 8,602  | 15     | 177.04 | 97.87  | 244.08 | 60     |    |
|                               |                    | 2000     | 5,652  | 3,190  | 9,142  | 16     | 157.12 | 88.67  | 254.13 | 60     |    |
|                               |                    | 2001     | 6,927  | 3,430  | 10,201 | 12     | 186.26 | 92.23  | 274.30 | 48     |    |
|                               |                    | 2002     | 6,135  | 2,279  | 11,479 | 13     | 161.44 | 59.96  | 302.04 | 52     |    |
|                               |                    | 2003     | 6,535  | 2,061  | 12,883 | 13     | 168.78 | 53.24  | 332.72 | 43     |    |
|                               |                    | 2004     | 7,056  | 2,019  | 14,234 | 13     | 178.39 | 51.05  | 359.87 | 38     |    |
|                               |                    | 2005     | 7,756  | 2,043  | 15,710 | 11     | 191.10 | 50.33  | 387.08 | 36     |    |
|                               | 2006               | 8,868    | 2,144  | 18,032 | 9      | 208.46 | 50.40  | 423.88 | 29     |        |    |
|                               | 2007               | 10,404   | 2,313  | 21,175 | 9      | 238.81 | 53.09  | 486.06 | 21     |        |    |
|                               |                    | Hispanic | 1992   | 1,631  | 686    | 3,165  | 36     | 55.66  | 23.40  | 107.99 | 82 |
|                               |                    |          | 1993   | 1,423  | 565    | 3,251  | 37     | 44.91  | 17.84  | 102.62 | 86 |
|                               |                    |          | 1994   | 1,774  | 771    | 3,287  | 36     | 51.93  | 22.56  | 96.23  | 81 |
|                               |                    |          | 1995   | 1,580  | 808    | 3,299  | 36     | 42.73  | 21.87  | 89.23  | 84 |
|                               |                    |          | 1996   | 1,613  | 870    | 3,122  | 36     | 40.18  | 21.68  | 77.76  | 83 |
|                               | 1997               |          | 1,630  | 928    | 2,849  | 36     | 37.30  | 21.25  | 65.21  | 83     |    |
|                               | 1998               |          | 1,650  | 995    | 2,614  | 36     | 34.85  | 21.00  | 55.21  | 82     |    |
|                               | 1999               |          | 1,922  | 1,062  | 2,649  | 36     | 37.62  | 20.80  | 51.87  | 81     |    |
|                               | 2000               |          | 1,856  | 1,048  | 3,002  | 35     | 33.86  | 19.11  | 54.76  | 80     |    |
|                               | 2001               |          | 2,403  | 1,190  | 3,539  | 31     | 41.03  | 20.32  | 60.42  | 76     |    |
|                               | 2002               | 2,216    | 823    | 4,146  | 32     | 35.91  | 13.34  | 67.19  | 75     |        |    |
|                               | 2003               | 2,407    | 759    | 4,745  | 27     | 37.25  | 11.75  | 73.44  | 74     |        |    |
|                               | 2004               | 2,584    | 739    | 5,212  | 27     | 38.30  | 10.96  | 77.26  | 71     |        |    |
|                               | 2005               | 2,744    | 723    | 5,558  | 27     | 38.80  | 10.22  | 78.59  | 71     |        |    |
|                               | 2006               | 2,943    | 712    | 5,984  | 26     | 39.60  | 9.57   | 80.52  | 71     |        |    |
|                               | 2007               | 3,155    | 701    | 6,420  | 25     | 40.51  | 9.01   | 82.44  | 68     |        |    |

| Metropolitan Statistical Area | PWID Population | Year   | Number | Min    | Max    | Rank   | Rate   | Min    | Max    | Rank   |    |
|-------------------------------|-----------------|--------|--------|--------|--------|--------|--------|--------|--------|--------|----|
| Dallas, TX                    | Male            | 1992   | 16,103 | 6,770  | 31,239 | 13     | 167.19 | 70.29  | 324.34 | 41     |    |
|                               |                 | 1993   | 13,093 | 5,201  | 29,915 | 22     | 132.76 | 52.74  | 303.34 | 51     |    |
|                               |                 | 1994   | 15,353 | 6,671  | 28,451 | 12     | 151.57 | 65.86  | 280.88 | 43     |    |
|                               |                 | 1995   | 12,965 | 6,635  | 27,074 | 18     | 124.46 | 63.69  | 259.89 | 51     |    |
|                               |                 | 1996   | 12,652 | 6,827  | 24,484 | 18     | 117.82 | 63.58  | 228.00 | 54     |    |
|                               |                 | 1997   | 12,297 | 7,004  | 21,499 | 19     | 110.43 | 62.90  | 193.08 | 57     |    |
|                               |                 | 1998   | 12,047 | 7,260  | 19,084 | 19     | 104.47 | 62.96  | 165.49 | 59     |    |
|                               |                 | 1999   | 13,623 | 7,531  | 18,782 | 14     | 114.33 | 63.20  | 157.63 | 60     |    |
|                               |                 | 2000   | 12,810 | 7,229  | 20,719 | 19     | 104.21 | 58.81  | 168.55 | 59     |    |
|                               |                 | 2001   | 16,156 | 8,000  | 23,792 | 12     | 126.86 | 62.81  | 186.82 | 49     |    |
|                               |                 | 2002   | 14,491 | 5,382  | 27,113 | 14     | 111.10 | 41.26  | 207.87 | 57     |    |
|                               |                 | 2003   | 15,267 | 4,816  | 30,096 | 14     | 114.87 | 36.23  | 226.44 | 51     |    |
|                               |                 | 2004   | 15,813 | 4,525  | 31,899 | 14     | 116.64 | 33.38  | 235.30 | 51     |    |
|                               |                 | 2005   | 16,082 | 4,235  | 32,574 | 15     | 115.81 | 30.50  | 234.58 | 51     |    |
|                               | 2006            | 16,349 | 3,953  | 33,244 | 15     | 114.49 | 27.68  | 232.80 | 51     |        |    |
|                               | 2007            | 16,397 | 3,645  | 33,374 | 15     | 112.03 | 24.91  | 228.01 | 51     |        |    |
|                               |                 | Female | 1992   | 9,877  | 4,153  | 19,161 | 11     | 102.61 | 43.14  | 199.06 | 34 |
|                               |                 |        | 1993   | 8,722  | 3,465  | 19,930 | 17     | 88.65  | 35.22  | 202.55 | 33 |
|                               |                 |        | 1994   | 10,918 | 4,744  | 20,233 | 8      | 108.48 | 47.13  | 201.02 | 24 |
|                               |                 |        | 1995   | 9,691  | 4,959  | 20,236 | 12     | 93.60  | 47.90  | 195.45 | 32 |
|                               |                 |        | 1996   | 9,805  | 5,291  | 18,975 | 9      | 92.10  | 49.70  | 178.24 | 31 |
|                               |                 |        | 1997   | 9,767  | 5,563  | 17,076 | 9      | 88.76  | 50.56  | 155.19 | 32 |
|                               |                 |        | 1998   | 9,714  | 5,854  | 15,389 | 12     | 85.49  | 51.52  | 135.43 | 36 |
|                               |                 |        | 1999   | 11,071 | 6,120  | 15,263 | 8      | 94.58  | 52.29  | 130.40 | 28 |
|                               |                 |        | 2000   | 10,436 | 5,889  | 16,879 | 11     | 86.69  | 48.92  | 140.20 | 34 |
|                               |                 |        | 2001   | 13,152 | 6,512  | 19,368 | 7      | 105.93 | 52.45  | 156.00 | 21 |
|                               | 2002            |        | 11,775 | 4,373  | 22,030 | 7      | 92.92  | 34.51  | 173.85 | 24     |    |
|                               | 2003            |        | 12,393 | 3,909  | 24,430 | 6      | 96.14  | 30.32  | 189.51 | 22     |    |
|                               | 2004            | 12,860 | 3,680  | 25,942 | 6      | 98.02  | 28.05  | 197.75 | 22     |        |    |
|                               | 2005            | 13,170 | 3,468  | 26,675 | 7      | 98.38  | 25.91  | 199.26 | 22     |        |    |
|                               | 2006            | 13,578 | 3,283  | 27,610 | 7      | 98.66  | 23.86  | 200.62 | 20     |        |    |
|                               | 2007            | 13,944 | 3,100  | 28,381 | 7      | 99.13  | 22.04  | 201.77 | 20     |        |    |

| Metropolitan Statistical Area | PWID Population | Year  | Number      | Min   | Max    | Rank  | Rate   | Min   | Max    | Rank  |        |    |
|-------------------------------|-----------------|-------|-------------|-------|--------|-------|--------|-------|--------|-------|--------|----|
| Dallas, TX                    | Young (15-29)   | 1992  | 9,210       | 3,872 | 17,867 | 5     | 135.25 | 56.86 | 262.38 | 24    |        |    |
|                               |                 | 1993  | 7,520       | 2,987 | 17,182 | 12    | 110.22 | 43.79 | 251.84 | 29    |        |    |
|                               |                 | 1994  | 8,842       | 3,842 | 16,386 | 6     | 128.45 | 55.81 | 238.03 | 23    |        |    |
|                               |                 | 1995  | 7,477       | 3,826 | 15,614 | 8     | 106.66 | 54.58 | 222.72 | 36    |        |    |
|                               |                 | 1996  | 7,299       | 3,939 | 14,124 | 8     | 101.37 | 54.70 | 196.17 | 40    |        |    |
|                               |                 | 1997  | 7,093       | 4,040 | 12,401 | 9     | 95.17  | 54.21 | 166.40 | 43    |        |    |
|                               |                 | 1998  | 6,949       | 4,188 | 11,009 | 11    | 89.97  | 54.22 | 142.54 | 46    |        |    |
|                               |                 | 1999  | 7,869       | 4,350 | 10,849 | 8     | 98.71  | 54.57 | 136.09 | 41    |        |    |
|                               |                 | 2000  | 7,424       | 4,190 | 12,007 | 9     | 90.68  | 51.18 | 146.67 | 49    |        |    |
|                               |                 | 2001  | 9,421       | 4,665 | 13,874 | 8     | 112.72 | 55.81 | 166.00 | 38    |        |    |
|                               |                 | 2002  | 8,535       | 3,170 | 15,968 | 9     | 101.17 | 37.57 | 189.28 | 47    |        |    |
|                               |                 | 2003  | 9,123       | 2,878 | 17,984 | 9     | 107.73 | 33.98 | 212.35 | 46    |        |    |
|                               |                 | 2004  | 9,639       | 2,758 | 19,445 | 9     | 113.04 | 32.35 | 228.03 | 40    |        |    |
|                               |                 | 2005  | 10,063      | 2,650 | 20,382 | 9     | 116.43 | 30.66 | 235.84 | 35    |        |    |
|                               |                 | 2006  | 10,576      | 2,557 | 21,505 | 9     | 120.31 | 29.09 | 244.64 | 32    |        |    |
|                               |                 | 2007  | 11,057      | 2,458 | 22,505 | 8     | 123.99 | 27.57 | 252.37 | 34    |        |    |
|                               |                 |       | Old (30-64) | 1992  | 16,686 | 7,015 | 32,371 | 16    | 134.05 | 56.36 | 260.06 | 43 |
|                               |                 |       |             | 1993  | 14,221 | 5,650 | 32,494 | 22    | 110.42 | 43.87 | 252.30 | 47 |
|                               |                 |       |             | 1994  | 17,328 | 7,529 | 32,111 | 15    | 130.18 | 56.57 | 241.24 | 42 |
|                               |                 |       |             | 1995  | 15,078 | 7,716 | 31,486 | 19    | 109.57 | 56.07 | 228.81 | 48 |
| 1996                          | 15,043          |       |             | 8,118 | 29,111 | 18    | 106.06 | 57.23 | 205.24 | 49    |        |    |
| 1997                          | 14,844          |       |             | 8,455 | 25,952 | 18    | 101.07 | 57.57 | 176.71 | 52    |        |    |
| 1998                          | 14,674          |       |             | 8,843 | 23,245 | 18    | 96.73  | 58.29 | 153.23 | 56    |        |    |
| 1999                          | 16,661          |       |             | 9,210 | 22,971 | 15    | 106.47 | 58.86 | 146.79 | 51    |        |    |
| 2000                          | 15,671          |       |             | 8,844 | 25,346 | 17    | 97.07  | 54.78 | 156.99 | 54    |        |    |
| 2001                          | 19,719          |       |             | 9,764 | 29,038 | 14    | 117.42 | 58.14 | 172.92 | 39    |        |    |
| 2002                          | 17,625          |       |             | 6,546 | 32,976 | 15    | 102.00 | 37.88 | 190.84 | 44    |        |    |
| 2003                          | 18,505          |       |             | 5,837 | 36,478 | 14    | 104.47 | 32.95 | 205.94 | 39    |        |    |
| 2004                          | 19,124          |       |             | 5,473 | 38,580 | 12    | 105.38 | 30.16 | 212.58 | 36    |        |    |
| 2005                          | 19,456          | 5,124 | 39,407      | 12    | 104.43 | 27.50 | 211.52 | 34    |        |       |        |    |
| 2006                          | 19,854          | 4,800 | 40,371      | 11    | 103.13 | 24.94 | 209.70 | 33    |        |       |        |    |
| 2007                          | 20,076          | 4,463 | 40,861      | 11    | 101.47 | 22.56 | 206.52 | 31    |        |       |        |    |

| Metropolitan Statistical Area | PWID Population | Year  | Number             | Min   | Max   | Rank  | Rate   | Min   | Max    | Rank  |       |    |
|-------------------------------|-----------------|-------|--------------------|-------|-------|-------|--------|-------|--------|-------|-------|----|
| Dayton--Springfield, OH       | Total           | 1992  | 4,078              | 2,455 | 5,759 | 83    | 64.11  | 38.60 | 90.53  | 88    |       |    |
|                               |                 | 1993  | 3,448              | 2,034 | 5,342 | 83    | 54.17  | 31.96 | 83.93  | 90    |       |    |
|                               |                 | 1994  | 3,756              | 2,707 | 4,940 | 85    | 59.23  | 42.68 | 77.89  | 88    |       |    |
|                               |                 | 1995  | 3,284              | 2,290 | 4,563 | 85    | 51.70  | 36.06 | 71.85  | 91    |       |    |
|                               |                 | 1996  | 3,238              | 2,425 | 4,243 | 86    | 51.05  | 38.23 | 66.89  | 90    |       |    |
|                               |                 | 1997  | 3,178              | 2,557 | 3,908 | 86    | 50.37  | 40.53 | 61.93  | 90    |       |    |
|                               |                 | 1998  | 3,203              | 2,701 | 3,916 | 86    | 50.78  | 42.83 | 62.09  | 89    |       |    |
|                               |                 | 1999  | 3,361              | 2,766 | 3,912 | 88    | 53.48  | 44.01 | 62.24  | 92    |       |    |
|                               |                 | 2000  | 3,328              | 2,620 | 4,180 | 88    | 53.06  | 41.78 | 66.64  | 85    |       |    |
|                               |                 | 2001  | 3,481              | 2,482 | 4,446 | 88    | 55.61  | 39.65 | 71.03  | 89    |       |    |
|                               |                 | 2002  | 3,606              | 2,357 | 4,962 | 88    | 57.58  | 37.64 | 79.24  | 78    |       |    |
|                               |                 | 2003  | 3,826              | 2,236 | 5,473 | 88    | 61.13  | 35.73 | 87.44  | 76    |       |    |
|                               |                 | 2004  | 4,105              | 2,126 | 6,000 | 88    | 65.47  | 33.91 | 95.72  | 72    |       |    |
|                               |                 | 2005  | 4,468              | 2,018 | 6,519 | 86    | 71.27  | 32.19 | 103.99 | 68    |       |    |
|                               |                 | 2006  | 4,831              | 1,911 | 7,022 | 80    | 77.21  | 30.54 | 112.23 | 63    |       |    |
|                               |                 | 2007  | 5,197              | 1,801 | 7,506 | 78    | 83.40  | 28.90 | 120.46 | 58    |       |    |
|                               |                 |       | Non-Hispanic White | 1992  | 2,079 | 1,252 | 2,936  | 81    | 38.57  | 23.22 | 54.47 | 88 |
|                               |                 |       |                    | 1993  | 1,647 | 972   | 2,552  | 88    | 30.63  | 18.07 | 47.46 | 92 |
|                               |                 |       |                    | 1994  | 1,712 | 1,233 | 2,251  | 88    | 32.02  | 23.07 | 42.11 | 96 |
|                               |                 |       |                    | 1995  | 1,453 | 1,014 | 2,020  | 92    | 27.23  | 18.99 | 37.84 | 97 |
| 1996                          | 1,417           |       |                    | 1,061 | 1,857 | 93    | 26.67  | 19.97 | 34.94  | 97    |       |    |
| 1997                          | 1,399           |       |                    | 1,126 | 1,720 | 93    | 26.53  | 21.35 | 32.62  | 96    |       |    |
| 1998                          | 1,440           |       |                    | 1,214 | 1,760 | 93    | 27.38  | 23.09 | 33.47  | 95    |       |    |
| 1999                          | 1,562           |       |                    | 1,286 | 1,818 | 89    | 29.90  | 24.61 | 34.80  | 94    |       |    |
| 2000                          | 1,616           |       |                    | 1,272 | 2,030 | 91    | 31.10  | 24.48 | 39.05  | 93    |       |    |
| 2001                          | 1,779           |       |                    | 1,269 | 2,273 | 89    | 34.37  | 24.50 | 43.89  | 94    |       |    |
| 2002                          | 1,950           |       |                    | 1,275 | 2,683 | 86    | 37.72  | 24.66 | 51.91  | 86    |       |    |
| 2003                          | 2,194           |       |                    | 1,282 | 3,138 | 82    | 42.55  | 24.87 | 60.86  | 83    |       |    |
| 2004                          | 2,495           |       |                    | 1,292 | 3,647 | 80    | 48.39  | 25.07 | 70.75  | 76    |       |    |
| 2005                          | 2,873           |       |                    | 1,298 | 4,192 | 77    | 55.80  | 25.21 | 81.43  | 69    |       |    |
| 2006                          | 3,275           |       |                    | 1,296 | 4,761 | 74    | 63.84  | 25.25 | 92.80  | 63    |       |    |
| 2007                          | 3,698           | 1,281 | 5,341              | 65    | 72.49 | 25.12 | 104.70 | 56    |        |       |       |    |

| Metropolitan Statistical Area | PWID Population    | Year | Number   | Min   | Max   | Rank | Rate   | Min    | Max    | Rank  |       |    |
|-------------------------------|--------------------|------|----------|-------|-------|------|--------|--------|--------|-------|-------|----|
| Dayton--Springfield, OH       | Non-Hispanic Black | 1992 | 1,804    | 1,086 | 2,548 | 59   | 217.49 | 130.95 | 307.15 | 71    |       |    |
|                               |                    | 1993 | 1,642    | 969   | 2,544 | 57   | 195.53 | 115.36 | 302.91 | 66    |       |    |
|                               |                    | 1994 | 1,874    | 1,350 | 2,464 | 56   | 221.88 | 159.88 | 291.79 | 65    |       |    |
|                               |                    | 1995 | 1,678    | 1,170 | 2,332 | 56   | 196.13 | 136.81 | 272.58 | 64    |       |    |
|                               |                    | 1996 | 1,663    | 1,245 | 2,179 | 53   | 192.85 | 144.42 | 252.69 | 58    |       |    |
|                               |                    | 1997 | 1,613    | 1,298 | 1,983 | 55   | 186.47 | 150.05 | 229.29 | 56    |       |    |
|                               |                    | 1998 | 1,581    | 1,334 | 1,933 | 56   | 181.46 | 153.03 | 221.84 | 56    |       |    |
|                               |                    | 1999 | 1,590    | 1,308 | 1,850 | 55   | 181.70 | 149.52 | 211.46 | 58    |       |    |
|                               |                    | 2000 | 1,485    | 1,169 | 1,865 | 56   | 168.29 | 132.51 | 211.36 | 54    |       |    |
|                               |                    | 2001 | 1,445    | 1,030 | 1,845 | 58   | 163.54 | 116.61 | 208.88 | 61    |       |    |
|                               |                    | 2002 | 1,373    | 897   | 1,889 | 57   | 154.42 | 100.94 | 212.48 | 55    |       |    |
|                               |                    | 2003 | 1,319    | 771   | 1,887 | 58   | 147.91 | 86.45  | 211.57 | 56    |       |    |
|                               |                    | 2004 | 1,268    | 657   | 1,854 | 59   | 141.69 | 73.39  | 207.13 | 57    |       |    |
|                               |                    | 2005 | 1,228    | 555   | 1,792 | 62   | 136.72 | 61.76  | 199.50 | 57    |       |    |
|                               |                    | 2006 | 1,178    | 466   | 1,712 | 63   | 130.73 | 51.72  | 190.03 | 59    |       |    |
|                               |                    | 2007 | 1,127    | 391   | 1,628 | 61   | 125.06 | 43.34  | 180.63 | 61    |       |    |
|                               |                    |      | Hispanic | 1992  | 12    | 7    | 17     | 100    | 22.34  | 13.45 | 31.56 | 98 |
|                               |                    |      |          | 1993  | 10    | 6    | 16     | 100    | 18.11  | 10.68 | 28.06 | 98 |
|                               |                    |      |          | 1994  | 11    | 8    | 15     | 100    | 19.14  | 13.79 | 25.17 | 97 |
|                               |                    |      |          | 1995  | 10    | 7    | 13     | 100    | 15.96  | 11.13 | 22.17 | 98 |
| 1996                          | 10                 |      |          | 7     | 12    | 100  | 15.09  | 11.30  | 19.77  | 98    |       |    |
| 1997                          | 9                  |      |          | 8     | 11    | 100  | 14.31  | 11.52  | 17.60  | 98    |       |    |
| 1998                          | 9                  |      |          | 8     | 12    | 100  | 13.85  | 11.68  | 16.93  | 98    |       |    |
| 1999                          | 10                 |      |          | 8     | 12    | 100  | 13.98  | 11.50  | 16.27  | 97    |       |    |
| 2000                          | 10                 |      |          | 8     | 13    | 100  | 13.29  | 10.46  | 16.69  | 97    |       |    |
| 2001                          | 11                 |      |          | 8     | 14    | 100  | 13.62  | 9.71   | 17.39  | 97    |       |    |
| 2002                          | 11                 |      |          | 7     | 16    | 100  | 13.83  | 9.04   | 19.04  | 95    |       |    |
| 2003                          | 13                 |      |          | 7     | 18    | 99   | 14.71  | 8.60   | 21.04  | 95    |       |    |
| 2004                          | 15                 |      |          | 8     | 21    | 99   | 15.98  | 8.28   | 23.35  | 95    |       |    |
| 2005                          | 17                 |      |          | 8     | 25    | 99   | 18.04  | 8.15   | 26.33  | 94    |       |    |
| 2006                          | 20                 | 8    | 30       | 98    | 20.90 | 8.27 | 30.37  | 92     |        |       |       |    |
| 2007                          | 25                 | 9    | 36       | 97    | 24.89 | 8.63 | 35.96  | 88     |        |       |       |    |

| Metropolitan Statistical Area | PWID Population | Year   | Number | Min   | Max   | Rank  | Rate  | Min    | Max    | Rank  |    |
|-------------------------------|-----------------|--------|--------|-------|-------|-------|-------|--------|--------|-------|----|
| Dayton--Springfield, OH       | Male            | 1992   | 2,557  | 1,540 | 3,612 | 84    | 82.39 | 49.61  | 116.36 | 89    |    |
|                               |                 | 1993   | 2,116  | 1,248 | 3,278 | 86    | 68.09 | 40.18  | 105.49 | 93    |    |
|                               |                 | 1994   | 2,264  | 1,631 | 2,977 | 86    | 73.13 | 52.69  | 96.17  | 93    |    |
|                               |                 | 1995   | 1,950  | 1,360 | 2,711 | 86    | 62.88 | 43.86  | 87.38  | 94    |    |
|                               |                 | 1996   | 1,902  | 1,424 | 2,492 | 87    | 61.39 | 45.97  | 80.44  | 94    |    |
|                               |                 | 1997   | 1,851  | 1,490 | 2,276 | 87    | 60.06 | 48.33  | 73.85  | 94    |    |
|                               |                 | 1998   | 1,855  | 1,564 | 2,268 | 87    | 60.22 | 50.79  | 73.62  | 93    |    |
|                               |                 | 1999   | 1,938  | 1,595 | 2,256 | 87    | 63.12 | 51.95  | 73.46  | 94    |    |
|                               |                 | 2000   | 1,914  | 1,507 | 2,404 | 87    | 62.44 | 49.16  | 78.41  | 91    |    |
|                               |                 | 2001   | 1,997  | 1,424 | 2,551 | 87    | 65.27 | 46.54  | 83.36  | 94    |    |
|                               |                 | 2002   | 2,065  | 1,350 | 2,842 | 87    | 67.42 | 44.07  | 92.78  | 85    |    |
|                               |                 | 2003   | 2,185  | 1,277 | 3,126 | 87    | 71.32 | 41.68  | 102.01 | 81    |    |
|                               |                 | 2004   | 2,336  | 1,210 | 3,415 | 87    | 76.03 | 39.38  | 111.15 | 76    |    |
|                               |                 | 2005   | 2,529  | 1,142 | 3,690 | 87    | 82.22 | 37.14  | 119.98 | 71    |    |
|                               | 2006            | 2,713  | 1,073  | 3,943 | 86    | 88.34 | 34.95 | 128.41 | 65     |       |    |
|                               | 2007            | 2,886  | 1,000  | 4,169 | 83    | 94.37 | 32.70 | 136.30 | 63     |       |    |
|                               |                 | Female | 1992   | 1,584 | 954   | 2,236 | 76    | 48.61  | 29.27  | 68.65 | 76 |
|                               |                 |        | 1993   | 1,385 | 817   | 2,146 | 80    | 42.52  | 25.09  | 65.87 | 83 |
|                               |                 |        | 1994   | 1,550 | 1,117 | 2,038 | 82    | 47.74  | 34.40  | 62.78 | 81 |
|                               |                 |        | 1995   | 1,383 | 965   | 1,922 | 83    | 42.57  | 29.69  | 59.16 | 84 |
|                               |                 |        | 1996   | 1,385 | 1,038 | 1,815 | 83    | 42.70  | 31.98  | 55.95 | 83 |
|                               |                 |        | 1997   | 1,375 | 1,106 | 1,691 | 84    | 42.60  | 34.28  | 52.38 | 82 |
|                               |                 |        | 1998   | 1,396 | 1,177 | 1,707 | 85    | 43.26  | 36.48  | 52.89 | 80 |
|                               |                 |        | 1999   | 1,472 | 1,211 | 1,713 | 86    | 45.79  | 37.68  | 53.29 | 85 |
|                               |                 |        | 2000   | 1,460 | 1,150 | 1,834 | 85    | 45.53  | 35.85  | 57.19 | 75 |
|                               |                 |        | 2001   | 1,528 | 1,090 | 1,952 | 86    | 47.78  | 34.07  | 61.02 | 82 |
|                               | 2002            |        | 1,582  | 1,034 | 2,177 | 83    | 49.45 | 32.32  | 68.05  | 72    |    |
|                               | 2003            |        | 1,677  | 980   | 2,399 | 82    | 52.50 | 30.69  | 75.10  | 68    |    |
|                               | 2004            | 1,798  | 931    | 2,629 | 81    | 56.24 | 29.13 | 82.22  | 63     |       |    |
|                               | 2005            | 1,957  | 884    | 2,856 | 80    | 61.30 | 27.69 | 89.44  | 57     |       |    |
|                               | 2006            | 2,120  | 839    | 3,082 | 72    | 66.55 | 26.33 | 96.73  | 46     |       |    |
|                               | 2007            | 2,290  | 793    | 3,307 | 67    | 72.18 | 25.01 | 104.25 | 43     |       |    |

| Metropolitan Statistical Area | PWID Population | Year        | Number | Min   | Max   | Rank   | Rate   | Min    | Max    | Rank   |    |
|-------------------------------|-----------------|-------------|--------|-------|-------|--------|--------|--------|--------|--------|----|
| Dayton--Springfield, OH       | Young (15-29)   | 1992        | 802    | 483   | 1,133 | 88     | 37.85  | 22.79  | 53.46  | 92     |    |
|                               |                 | 1993        | 535    | 316   | 829   | 95     | 25.61  | 15.11  | 39.67  | 99     |    |
|                               |                 | 1994        | 499    | 359   | 656   | 96     | 24.26  | 17.48  | 31.91  | 99     |    |
|                               |                 | 1995        | 403    | 281   | 560   | 96     | 19.75  | 13.78  | 27.45  | 100    |    |
|                               |                 | 1996        | 394    | 295   | 516   | 96     | 19.46  | 14.58  | 25.50  | 100    |    |
|                               |                 | 1997        | 407    | 327   | 500   | 96     | 20.31  | 16.34  | 24.97  | 100    |    |
|                               |                 | 1998        | 452    | 381   | 553   | 95     | 22.69  | 19.13  | 27.73  | 100    |    |
|                               |                 | 1999        | 543    | 447   | 632   | 95     | 27.56  | 22.68  | 32.07  | 100    |    |
|                               |                 | 2000        | 629    | 495   | 790   | 95     | 32.25  | 25.39  | 40.51  | 99     |    |
|                               |                 | 2001        | 777    | 554   | 993   | 95     | 40.40  | 28.81  | 51.60  | 96     |    |
|                               |                 | 2002        | 950    | 621   | 1,308 | 93     | 49.43  | 32.31  | 68.02  | 85     |    |
|                               |                 | 2003        | 1,175  | 687   | 1,681 | 89     | 61.11  | 35.72  | 87.40  | 80     |    |
|                               |                 | 2004        | 1,439  | 745   | 2,104 | 85     | 74.43  | 38.55  | 108.81 | 71     |    |
|                               |                 | 2005        | 1,741  | 787   | 2,541 | 76     | 89.55  | 40.45  | 130.67 | 55     |    |
|                               |                 | 2006        | 2,030  | 803   | 2,950 | 73     | 104.18 | 41.21  | 151.43 | 43     |    |
|                               | 2007            | 2,275       | 789    | 3,286 | 62    | 117.15 | 40.60  | 169.21 | 36     |        |    |
|                               |                 | Old (30-64) | 1992   | 3,367 | 2,027 | 4,754  | 79     | 79.35  | 47.78  | 112.07 | 85 |
|                               |                 |             | 1993   | 2,970 | 1,752 | 4,601  | 82     | 69.49  | 41.00  | 107.66 | 84 |
|                               |                 |             | 1994   | 3,310 | 2,385 | 4,352  | 80     | 77.21  | 55.64  | 101.54 | 84 |
|                               |                 |             | 1995   | 2,922 | 2,038 | 4,061  | 82     | 67.78  | 47.28  | 94.19  | 83 |
|                               | 1996            |             | 2,885  | 2,161 | 3,781 | 84     | 66.80  | 50.03  | 87.53  | 83     |    |
|                               | 1997            |             | 2,814  | 2,265 | 3,461 | 85     | 65.33  | 52.57  | 80.33  | 79     |    |
|                               | 1998            |             | 2,798  | 2,360 | 3,421 | 85     | 64.88  | 54.71  | 79.32  | 78     |    |
|                               | 1999            |             | 2,873  | 2,364 | 3,344 | 85     | 66.59  | 54.80  | 77.50  | 80     |    |
|                               | 2000            |             | 2,757  | 2,171 | 3,463 | 85     | 63.79  | 50.23  | 80.12  | 76     |    |
|                               | 2001            |             | 2,765  | 1,971 | 3,531 | 85     | 63.78  | 45.48  | 81.47  | 79     |    |
|                               | 2002            | 2,714       | 1,774  | 3,734 | 84    | 62.53  | 40.87  | 86.04  | 73     |        |    |
|                               | 2003            | 2,696       | 1,576  | 3,857 | 84    | 62.18  | 36.34  | 88.94  | 73     |        |    |
|                               | 2004            | 2,682       | 1,389  | 3,921 | 83    | 61.87  | 32.05  | 90.44  | 72     |        |    |
|                               | 2005            | 2,692       | 1,216  | 3,929 | 83    | 62.26  | 28.12  | 90.85  | 69     |        |    |
|                               | 2006            | 2,687       | 1,063  | 3,906 | 83    | 62.36  | 24.67  | 90.65  | 66     |        |    |
|                               | 2007            | 2,694       | 934    | 3,891 | 82    | 62.81  | 21.77  | 90.72  | 65     |        |    |



| Metropolitan Statistical Area | PWID Population | Year  | Number             | Min    | Max    | Rank  | Rate   | Min    | Max    | Rank  |        |    |
|-------------------------------|-----------------|-------|--------------------|--------|--------|-------|--------|--------|--------|-------|--------|----|
| Denver, CO                    | Total           | 1992  | 21,546             | 15,905 | 26,329 | 21    | 182.60 | 134.80 | 223.14 | 20    |        |    |
|                               |                 | 1993  | 20,467             | 16,063 | 24,871 | 19    | 167.31 | 131.30 | 203.31 | 23    |        |    |
|                               |                 | 1994  | 20,006             | 16,053 | 23,142 | 22    | 159.29 | 127.82 | 184.26 | 24    |        |    |
|                               |                 | 1995  | 19,432             | 16,075 | 21,345 | 20    | 150.40 | 124.41 | 165.20 | 28    |        |    |
|                               |                 | 1996  | 18,862             | 16,066 | 20,925 | 20    | 142.17 | 121.10 | 157.72 | 31    |        |    |
|                               |                 | 1997  | 18,214             | 16,060 | 21,304 | 20    | 133.68 | 117.87 | 156.36 | 32    |        |    |
|                               |                 | 1998  | 17,775             | 15,986 | 21,598 | 21    | 127.56 | 114.73 | 155.00 | 33    |        |    |
|                               |                 | 1999  | 15,878             | 15,004 | 16,619 | 27    | 110.74 | 104.65 | 115.91 | 43    |        |    |
|                               |                 | 2000  | 17,267             | 14,308 | 21,891 | 21    | 118.37 | 98.08  | 150.07 | 39    |        |    |
|                               |                 | 2001  | 15,665             | 13,667 | 17,527 | 26    | 104.89 | 91.51  | 117.36 | 47    |        |    |
|                               |                 | 2002  | 16,650             | 13,081 | 19,074 | 21    | 110.01 | 86.43  | 126.02 | 39    |        |    |
|                               |                 | 2003  | 16,289             | 12,400 | 20,100 | 21    | 106.86 | 81.35  | 131.87 | 40    |        |    |
|                               |                 | 2004  | 15,976             | 11,840 | 21,440 | 23    | 103.70 | 76.86  | 139.17 | 41    |        |    |
|                               |                 | 2005  | 15,638             | 11,291 | 22,855 | 24    | 100.23 | 72.37  | 146.48 | 42    |        |    |
|                               |                 | 2006  | 15,402             | 10,803 | 24,554 | 23    | 97.04  | 68.06  | 154.69 | 45    |        |    |
|                               |                 | 2007  | 15,141             | 9,356  | 26,353 | 24    | 93.59  | 57.84  | 162.91 | 48    |        |    |
|                               |                 |       | Non-Hispanic White | 1992   | 10,419 | 7,692 | 12,733 | 21     | 113.19 | 83.56 | 138.33 | 31 |
|                               |                 |       |                    | 1993   | 9,827  | 7,712 | 11,942 | 21     | 103.84 | 81.49 | 126.19 | 34 |
|                               |                 |       |                    | 1994   | 9,621  | 7,720 | 11,129 | 21     | 99.73  | 80.03 | 115.36 | 37 |
|                               |                 |       |                    | 1995   | 9,438  | 7,807 | 10,367 | 22     | 95.91  | 79.34 | 105.35 | 36 |
| 1996                          | 9,323           |       |                    | 7,941  | 10,343 | 23    | 93.16  | 79.35  | 103.34 | 40    |        |    |
| 1997                          | 9,226           |       |                    | 8,135  | 10,792 | 22    | 90.64  | 79.91  | 106.01 | 41    |        |    |
| 1998                          | 9,284           |       |                    | 8,350  | 11,281 | 23    | 90.12  | 81.05  | 109.51 | 39    |        |    |
| 1999                          | 8,596           |       |                    | 8,123  | 8,997  | 22    | 81.99  | 77.48  | 85.81  | 47    |        |    |
| 2000                          | 9,729           |       |                    | 8,062  | 12,334 | 19    | 92.33  | 76.51  | 117.06 | 40    |        |    |
| 2001                          | 9,215           |       |                    | 8,040  | 10,310 | 22    | 86.17  | 75.18  | 96.41  | 40    |        |    |
| 2002                          | 10,246          |       |                    | 8,049  | 11,737 | 19    | 95.39  | 74.95  | 109.28 | 35    |        |    |
| 2003                          | 10,494          |       |                    | 7,989  | 12,949 | 19    | 97.78  | 74.43  | 120.66 | 33    |        |    |
| 2004                          | 10,773          |       |                    | 7,984  | 14,458 | 18    | 100.07 | 74.16  | 134.29 | 33    |        |    |
| 2005                          | 11,026          |       |                    | 7,961  | 16,114 | 18    | 101.76 | 73.47  | 148.72 | 33    |        |    |
| 2006                          | 11,331          |       |                    | 7,947  | 18,064 | 17    | 103.48 | 72.58  | 164.97 | 29    |        |    |
| 2007                          | 11,591          | 7,163 | 20,175             | 17     | 104.45 | 64.54 | 181.79 | 28     |        |       |        |    |

| Metropolitan Statistical Area | PWID Population    | Year  | Number   | Min   | Max   | Rank  | Rate   | Min    | Max    | Rank   |        |    |
|-------------------------------|--------------------|-------|----------|-------|-------|-------|--------|--------|--------|--------|--------|----|
| Denver, CO                    | Non-Hispanic Black | 1992  | 3,137    | 2,316 | 3,834 | 34    | 473.29 | 349.39 | 578.37 | 18     |        |    |
|                               |                    | 1993  | 2,758    | 2,165 | 3,352 | 35    | 402.66 | 316.01 | 489.31 | 24     |        |    |
|                               |                    | 1994  | 2,534    | 2,033 | 2,931 | 41    | 362.26 | 290.68 | 419.03 | 26     |        |    |
|                               |                    | 1995  | 2,344    | 1,939 | 2,575 | 38    | 329.16 | 272.29 | 361.56 | 28     |        |    |
|                               |                    | 1996  | 2,195    | 1,869 | 2,435 | 40    | 301.03 | 256.41 | 333.95 | 29     |        |    |
|                               |                    | 1997  | 2,067    | 1,822 | 2,418 | 42    | 276.44 | 243.74 | 323.33 | 31     |        |    |
|                               |                    | 1998  | 1,987    | 1,787 | 2,414 | 42    | 259.02 | 232.96 | 314.73 | 28     |        |    |
|                               |                    | 1999  | 1,762    | 1,665 | 1,845 | 48    | 223.75 | 211.44 | 234.19 | 41     |        |    |
|                               |                    | 2000  | 1,917    | 1,588 | 2,430 | 42    | 238.30 | 197.46 | 302.11 | 29     |        |    |
|                               |                    | 2001  | 1,748    | 1,525 | 1,955 | 48    | 211.81 | 184.80 | 236.99 | 31     |        |    |
|                               |                    | 2002  | 1,874    | 1,472 | 2,146 | 41    | 222.83 | 175.07 | 255.27 | 26     |        |    |
|                               |                    | 2003  | 1,853    | 1,410 | 2,286 | 40    | 219.53 | 167.12 | 270.90 | 26     |        |    |
|                               |                    | 2004  | 1,838    | 1,362 | 2,467 | 37    | 212.00 | 157.12 | 284.51 | 27     |        |    |
|                               |                    | 2005  | 1,820    | 1,314 | 2,660 | 36    | 208.46 | 150.51 | 304.66 | 28     |        |    |
|                               |                    | 2006  | 1,812    | 1,271 | 2,889 | 38    | 202.33 | 141.90 | 322.54 | 33     |        |    |
|                               |                    | 2007  | 1,801    | 1,113 | 3,135 | 43    | 197.17 | 121.85 | 343.19 | 37     |        |    |
|                               |                    |       | Hispanic | 1992  | 5,737 | 4,235 | 7,011  | 12     | 363.95 | 268.67 | 444.76 | 12 |
|                               |                    |       |          | 1993  | 5,213 | 4,091 | 6,335  | 14     | 306.74 | 240.73 | 372.75 | 15 |
|                               |                    |       |          | 1994  | 4,885 | 3,920 | 5,651  | 14     | 270.98 | 217.44 | 313.45 | 18 |
|                               |                    |       |          | 1995  | 4,559 | 3,771 | 5,007  | 16     | 236.62 | 195.74 | 259.91 | 20 |
| 1996                          | 4,261              |       |          | 3,629 | 4,726 | 17    | 206.62 | 175.99 | 229.21 | 22     |        |    |
| 1997                          | 3,969              |       |          | 3,500 | 4,643 | 17    | 180.44 | 159.10 | 211.05 | 26     |        |    |
| 1998                          | 3,745              |       |          | 3,368 | 4,551 | 17    | 160.41 | 144.26 | 194.91 | 27     |        |    |
| 1999                          | 3,241              |       |          | 3,063 | 3,392 | 21    | 129.78 | 122.64 | 135.84 | 34     |        |    |
| 2000                          | 3,421              |       |          | 2,835 | 4,337 | 20    | 129.28 | 107.12 | 163.89 | 33     |        |    |
| 2001                          | 3,019              |       |          | 2,634 | 3,378 | 25    | 108.24 | 94.43  | 121.11 | 40     |        |    |
| 2002                          | 3,128              |       |          | 2,457 | 3,583 | 24    | 107.65 | 84.57  | 123.32 | 38     |        |    |
| 2003                          | 2,990              |       |          | 2,276 | 3,690 | 25    | 99.54  | 75.77  | 122.83 | 42     |        |    |
| 2004                          | 2,873              |       |          | 2,129 | 3,856 | 26    | 92.88  | 68.84  | 124.65 | 43     |        |    |
| 2005                          | 2,765              |       |          | 1,996 | 4,041 | 26    | 86.38  | 62.37  | 126.24 | 43     |        |    |
| 2006                          | 2,687              |       |          | 1,885 | 4,284 | 27    | 81.06  | 56.85  | 129.23 | 47     |        |    |
| 2007                          | 2,619              | 1,619 | 4,559    | 27    | 76.26 | 47.12 | 132.73 | 49     |        |        |        |    |

| Metropolitan Statistical Area | PWID Population | Year   | Number | Min    | Max    | Rank   | Rate   | Min    | Max    | Rank   |    |
|-------------------------------|-----------------|--------|--------|--------|--------|--------|--------|--------|--------|--------|----|
| Denver, CO                    | Male            | 1992   | 14,459 | 10,674 | 17,670 | 20     | 245.17 | 180.99 | 299.61 | 19     |    |
|                               |                 | 1993   | 13,356 | 10,482 | 16,231 | 20     | 218.05 | 171.13 | 264.97 | 25     |    |
|                               |                 | 1994   | 12,788 | 10,261 | 14,792 | 21     | 203.20 | 163.05 | 235.04 | 29     |    |
|                               |                 | 1995   | 12,253 | 10,136 | 13,459 | 22     | 188.81 | 156.19 | 207.39 | 33     |    |
|                               |                 | 1996   | 11,810 | 10,059 | 13,101 | 23     | 176.98 | 150.74 | 196.33 | 33     |    |
|                               |                 | 1997   | 11,389 | 10,042 | 13,321 | 23     | 165.86 | 146.24 | 194.00 | 35     |    |
|                               |                 | 1998   | 11,153 | 10,030 | 13,551 | 22     | 158.45 | 142.50 | 192.53 | 36     |    |
|                               |                 | 1999   | 10,032 | 9,480  | 10,500 | 27     | 138.18 | 130.57 | 144.63 | 42     |    |
|                               |                 | 2000   | 11,011 | 9,124  | 13,960 | 22     | 148.69 | 123.20 | 188.50 | 40     |    |
|                               |                 | 2001   | 10,094 | 8,807  | 11,294 | 26     | 132.92 | 115.97 | 148.72 | 47     |    |
|                               |                 | 2002   | 10,843 | 8,519  | 12,421 | 21     | 140.79 | 110.61 | 161.28 | 39     |    |
|                               |                 | 2003   | 10,711 | 8,153  | 13,217 | 20     | 138.29 | 105.27 | 170.64 | 40     |    |
|                               |                 | 2004   | 10,586 | 7,846  | 14,207 | 20     | 134.91 | 99.99  | 181.06 | 40     |    |
|                               |                 | 2005   | 10,415 | 7,520  | 15,221 | 20     | 131.24 | 94.76  | 191.80 | 40     |    |
|                               |                 | 2006   | 10,271 | 7,204  | 16,374 | 22     | 127.12 | 89.16  | 202.65 | 42     |    |
|                               | 2007            | 10,064 | 6,219  | 17,516 | 23     | 122.16 | 75.49  | 212.63 | 43     |        |    |
|                               |                 | Female | 1992   | 6,490  | 4,791  | 7,931  | 24     | 109.96 | 81.17  | 134.38 | 27 |
|                               |                 |        | 1993   | 6,555  | 5,145  | 7,966  | 21     | 107.33 | 84.23  | 130.43 | 24 |
|                               |                 |        | 1994   | 6,717  | 5,390  | 7,770  | 20     | 107.20 | 86.02  | 123.99 | 26 |
|                               |                 |        | 1995   | 6,755  | 5,588  | 7,420  | 21     | 105.04 | 86.89  | 115.38 | 23 |
|                               |                 |        | 1996   | 6,717  | 5,722  | 7,452  | 21     | 101.87 | 86.77  | 113.01 | 23 |
|                               |                 |        | 1997   | 6,584  | 5,805  | 7,701  | 21     | 97.43  | 85.90  | 113.95 | 25 |
|                               |                 |        | 1998   | 6,471  | 5,820  | 7,863  | 21     | 93.84  | 84.40  | 114.03 | 26 |
|                               |                 |        | 1999   | 5,782  | 5,464  | 6,052  | 24     | 81.70  | 77.20  | 85.51  | 45 |
|                               |                 |        | 2000   | 6,254  | 5,182  | 7,929  | 21     | 87.08  | 72.16  | 110.40 | 33 |
|                               | 2001            |        | 5,617  | 4,901  | 6,285  | 25     | 76.52  | 66.76  | 85.62  | 48     |    |
|                               | 2002            | 5,889  | 4,627  | 6,747  | 22     | 79.23  | 62.25  | 90.76  | 38     |        |    |
|                               | 2003            | 5,668  | 4,315  | 6,994  | 24     | 75.60  | 57.55  | 93.28  | 40     |        |    |
|                               | 2004            | 5,460  | 4,047  | 7,327  | 25     | 72.24  | 53.54  | 96.95  | 43     |        |    |
|                               | 2005            | 5,247  | 3,788  | 7,668  | 26     | 68.43  | 49.41  | 100.01 | 47     |        |    |
|                               | 2006            | 5,076  | 3,560  | 8,092  | 27     | 65.14  | 45.69  | 103.84 | 51     |        |    |
|                               | 2007            | 4,911  | 3,035  | 8,548  | 29     | 61.86  | 38.23  | 107.66 | 51     |        |    |

| Metropolitan Statistical Area | PWID Population | Year  | Number      | Min    | Max    | Rank   | Rate   | Min    | Max    | Rank   |        |    |
|-------------------------------|-----------------|-------|-------------|--------|--------|--------|--------|--------|--------|--------|--------|----|
| Denver, CO                    | Young (15-29)   | 1992  | 5,301       | 3,913  | 6,478  | 21     | 146.06 | 107.83 | 178.50 | 18     |        |    |
|                               |                 | 1993  | 5,149       | 4,041  | 6,257  | 19     | 139.29 | 109.32 | 169.27 | 21     |        |    |
|                               |                 | 1994  | 5,177       | 4,154  | 5,989  | 21     | 138.50 | 111.14 | 160.21 | 18     |        |    |
|                               |                 | 1995  | 5,192       | 4,295  | 5,703  | 19     | 135.24 | 111.87 | 148.55 | 19     |        |    |
|                               |                 | 1996  | 5,212       | 4,439  | 5,782  | 18     | 131.37 | 111.89 | 145.73 | 22     |        |    |
|                               |                 | 1997  | 5,202       | 4,587  | 6,084  | 18     | 126.34 | 111.40 | 147.77 | 26     |        |    |
|                               |                 | 1998  | 5,235       | 4,708  | 6,361  | 17     | 122.86 | 110.49 | 149.28 | 29     |        |    |
|                               |                 | 1999  | 4,801       | 4,537  | 5,025  | 20     | 108.79 | 102.80 | 113.87 | 36     |        |    |
|                               |                 | 2000  | 5,329       | 4,416  | 6,756  | 19     | 118.19 | 97.93  | 149.84 | 33     |        |    |
|                               |                 | 2001  | 4,896       | 4,271  | 5,478  | 23     | 107.64 | 93.91  | 120.44 | 39     |        |    |
|                               |                 | 2002  | 5,219       | 4,100  | 5,978  | 23     | 114.79 | 90.18  | 131.50 | 39     |        |    |
|                               |                 | 2003  | 5,062       | 3,853  | 6,246  | 23     | 112.06 | 85.30  | 138.27 | 43     |        |    |
|                               |                 | 2004  | 4,856       | 3,599  | 6,517  | 24     | 107.04 | 79.33  | 143.65 | 46     |        |    |
|                               |                 | 2005  | 4,577       | 3,305  | 6,690  | 28     | 100.62 | 72.65  | 147.06 | 52     |        |    |
|                               |                 | 2006  | 4,262       | 2,989  | 6,795  | 31     | 92.60  | 64.95  | 147.62 | 54     |        |    |
|                               |                 | 2007  | 3,878       | 2,397  | 6,751  | 36     | 82.93  | 51.25  | 144.34 | 57     |        |    |
|                               |                 |       | Old (30-64) | 1992   | 15,893 | 11,733 | 19,422 | 19     | 194.53 | 143.60 | 237.72 | 23 |
|                               |                 |       |             | 1993   | 15,025 | 11,792 | 18,258 | 20     | 176.01 | 138.13 | 213.89 | 26 |
|                               |                 |       |             | 1994   | 14,599 | 11,715 | 16,887 | 20     | 165.50 | 132.80 | 191.43 | 32 |
|                               |                 |       |             | 1995   | 14,084 | 11,650 | 15,470 | 20     | 155.08 | 128.29 | 170.35 | 29 |
|                               |                 |       |             | 1996   | 13,569 | 11,558 | 15,053 | 22     | 145.90 | 124.27 | 161.86 | 32 |
| 1997                          | 12,999          |       |             | 11,462 | 15,204 | 23     | 136.72 | 120.55 | 159.92 | 35     |        |    |
| 1998                          | 12,582          |       |             | 11,316 | 15,288 | 24     | 130.07 | 116.98 | 158.05 | 37     |        |    |
| 1999                          | 11,148          |       |             | 10,535 | 11,668 | 28     | 112.34 | 106.15 | 117.58 | 46     |        |    |
| 2000                          | 12,030          |       |             | 9,968  | 15,252 | 23     | 119.36 | 98.90  | 151.32 | 39     |        |    |
| 2001                          | 10,841          |       |             | 9,458  | 12,129 | 27     | 104.37 | 91.06  | 116.77 | 49     |        |    |
| 2002                          | 11,462          |       |             | 9,005  | 13,130 | 23     | 108.25 | 85.04  | 124.00 | 39     |        |    |
| 2003                          | 11,178          |       |             | 8,509  | 13,793 | 23     | 104.22 | 79.34  | 128.60 | 40     |        |    |
| 2004                          | 10,957          |       |             | 8,121  | 14,705 | 22     | 100.82 | 74.72  | 135.30 | 41     |        |    |
| 2005                          | 10,753          |       |             | 7,764  | 15,715 | 23     | 97.28  | 70.24  | 142.17 | 42     |        |    |
| 2006                          | 10,651          |       |             | 7,470  | 16,979 | 24     | 94.51  | 66.28  | 150.66 | 40     |        |    |
| 2007                          | 10,559          | 6,525 | 18,379      | 23     | 91.82  | 56.74  | 159.82 | 37     |        |        |        |    |

| Metropolitan Statistical Area | PWID Population | Year  | Number             | Min    | Max    | Rank  | Rate   | Min   | Max    | Rank  |
|-------------------------------|-----------------|-------|--------------------|--------|--------|-------|--------|-------|--------|-------|
| Detroit, MI                   | Total           | 1992  | 23,345             | 10,293 | 35,424 | 17    | 81.86  | 36.09 | 124.21 | 69    |
|                               |                 | 1993  | 24,029             | 11,831 | 34,676 | 16    | 84.11  | 41.41 | 121.37 | 61    |
|                               |                 | 1994  | 23,119             | 13,367 | 33,985 | 15    | 80.64  | 46.62 | 118.54 | 71    |
|                               |                 | 1995  | 25,225             | 14,965 | 33,418 | 14    | 87.38  | 51.84 | 115.75 | 57    |
|                               |                 | 1996  | 25,917             | 16,459 | 34,009 | 13    | 89.08  | 56.57 | 116.89 | 55    |
|                               |                 | 1997  | 26,407             | 17,851 | 36,169 | 11    | 90.68  | 61.30 | 124.21 | 54    |
|                               |                 | 1998  | 27,020             | 18,223 | 38,124 | 10    | 92.85  | 62.62 | 131.02 | 52    |
|                               |                 | 1999  | 23,518             | 18,617 | 30,647 | 13    | 80.78  | 63.95 | 105.27 | 63    |
|                               |                 | 2000  | 27,608             | 17,469 | 39,390 | 10    | 94.58  | 59.85 | 134.94 | 51    |
|                               |                 | 2001  | 23,936             | 16,374 | 29,488 | 13    | 81.49  | 55.74 | 100.39 | 60    |
|                               |                 | 2002  | 27,901             | 14,916 | 39,329 | 10    | 94.60  | 50.58 | 133.35 | 50    |
|                               |                 | 2003  | 27,868             | 13,456 | 38,663 | 10    | 94.04  | 45.41 | 130.47 | 49    |
|                               |                 | 2004  | 27,568             | 11,923 | 37,464 | 11    | 92.60  | 40.05 | 125.83 | 50    |
|                               |                 | 2005  | 27,248             | 10,375 | 36,160 | 11    | 91.09  | 34.69 | 120.89 | 51    |
|                               |                 | 2006  | 26,860             | 8,850  | 37,157 | 14    | 89.58  | 29.52 | 123.92 | 54    |
|                               |                 | 2007  | 26,289             | 7,273  | 38,942 | 14    | 88.00  | 24.35 | 130.35 | 54    |
|                               |                 |       | Non-Hispanic White | 1992   | 9,951  | 4,388 | 15,100 | 22    | 46.91  | 20.69 |
| 1993                          | 10,309          |       |                    | 5,076  | 14,876 | 19    | 48.72  | 23.99 | 70.31  | 69    |
| 1994                          | 9,904           |       |                    | 5,727  | 14,559 | 20    | 46.86  | 27.09 | 68.88  | 78    |
| 1995                          | 10,726          |       |                    | 6,364  | 14,210 | 16    | 50.66  | 30.06 | 67.11  | 67    |
| 1996                          | 10,891          |       |                    | 6,917  | 14,292 | 16    | 51.27  | 32.56 | 67.28  | 67    |
| 1997                          | 10,938          |       |                    | 7,394  | 14,981 | 15    | 51.67  | 34.93 | 70.78  | 67    |
| 1998                          | 11,021          |       |                    | 7,433  | 15,550 | 15    | 52.35  | 35.31 | 73.87  | 66    |
| 1999                          | 9,453           |       |                    | 7,483  | 12,319 | 19    | 45.15  | 35.74 | 58.84  | 76    |
| 2000                          | 10,966          |       |                    | 6,939  | 15,646 | 16    | 52.50  | 33.22 | 74.90  | 69    |
| 2001                          | 9,438           |       |                    | 6,456  | 11,627 | 19    | 45.09  | 30.85 | 55.55  | 80    |
| 2002                          | 10,990          |       |                    | 5,876  | 15,492 | 18    | 52.54  | 28.09 | 74.06  | 71    |
| 2003                          | 11,056          |       |                    | 5,339  | 15,340 | 18    | 52.86  | 25.52 | 73.33  | 69    |
| 2004                          | 11,123          |       |                    | 4,810  | 15,116 | 17    | 53.17  | 23.00 | 72.26  | 69    |
| 2005                          | 11,300          | 4,303 | 14,996             | 16     | 54.03  | 20.57 | 71.70  | 71    |        |       |
| 2006                          | 11,579          | 3,815 | 16,017             | 16     | 55.49  | 18.28 | 76.76  | 69    |        |       |
| 2007                          | 11,910          | 3,295 | 17,642             | 15     | 57.51  | 15.91 | 85.19  | 68    |        |       |

| Metropolitan Statistical Area | PWID Population    | Year | Number   | Min   | Max    | Rank  | Rate   | Min    | Max    | Rank  |        |    |
|-------------------------------|--------------------|------|----------|-------|--------|-------|--------|--------|--------|-------|--------|----|
| Detroit, MI                   | Non-Hispanic Black | 1992 | 12,458   | 5,493 | 18,904 | 7     | 202.10 | 89.11  | 306.67 | 75    |        |    |
|                               |                    | 1993 | 12,519   | 6,164 | 18,067 | 7     | 201.37 | 99.14  | 290.59 | 64    |        |    |
|                               |                    | 1994 | 11,848   | 6,850 | 17,416 | 8     | 188.64 | 109.07 | 277.31 | 73    |        |    |
|                               |                    | 1995 | 12,796   | 7,592 | 16,952 | 8     | 201.06 | 119.28 | 266.36 | 60    |        |    |
|                               |                    | 1996 | 13,081   | 8,307 | 17,166 | 8     | 203.55 | 129.27 | 267.11 | 53    |        |    |
|                               |                    | 1997 | 13,314   | 9,000 | 18,235 | 8     | 206.29 | 139.45 | 282.55 | 52    |        |    |
|                               |                    | 1998 | 13,642   | 9,200 | 19,248 | 8     | 210.56 | 142.01 | 297.09 | 46    |        |    |
|                               |                    | 1999 | 11,904   | 9,424 | 15,513 | 8     | 182.67 | 144.61 | 238.05 | 56    |        |    |
|                               |                    | 2000 | 14,008   | 8,864 | 19,986 | 7     | 214.06 | 135.45 | 305.41 | 37    |        |    |
|                               |                    | 2001 | 12,155   | 8,315 | 14,975 | 8     | 184.12 | 125.95 | 226.83 | 51    |        |    |
|                               |                    | 2002 | 14,140   | 7,560 | 19,932 | 4     | 212.44 | 113.58 | 299.46 | 31    |        |    |
|                               |                    | 2003 | 14,036   | 6,777 | 19,474 | 4     | 208.95 | 100.89 | 289.89 | 29    |        |    |
|                               |                    | 2004 | 13,724   | 5,935 | 18,650 | 4     | 202.12 | 87.41  | 274.66 | 29    |        |    |
|                               |                    | 2005 | 13,315   | 5,070 | 17,671 | 6     | 193.71 | 73.76  | 257.07 | 33    |        |    |
|                               |                    | 2006 | 12,779   | 4,210 | 17,678 | 6     | 183.99 | 60.62  | 254.52 | 38    |        |    |
|                               |                    | 2007 | 12,063   | 3,337 | 17,868 | 7     | 173.05 | 47.88  | 256.34 | 45    |        |    |
|                               |                    |      | Hispanic | 1992  | 447    | 197   | 678    | 56     | 76.12  | 33.56 | 115.51 | 66 |
|                               |                    |      |          | 1993  | 464    | 229   | 670    | 52     | 76.35  | 37.59 | 110.18 | 64 |
|                               |                    |      |          | 1994  | 445    | 257   | 654    | 55     | 70.30  | 40.65 | 103.35 | 72 |
|                               |                    |      |          | 1995  | 478    | 283   | 633    | 53     | 71.95  | 42.69 | 95.32  | 61 |
| 1996                          | 479                |      |          | 304   | 629    | 53    | 68.07  | 43.23  | 89.33  | 62    |        |    |
| 1997                          | 475                |      |          | 321   | 650    | 55    | 64.72  | 43.75  | 88.65  | 64    |        |    |
| 1998                          | 471                |      |          | 318   | 664    | 56    | 61.64  | 41.57  | 86.97  | 61    |        |    |
| 1999                          | 398                |      |          | 315   | 518    | 58    | 50.07  | 39.63  | 65.24  | 73    |        |    |
| 2000                          | 455                |      |          | 288   | 649    | 57    | 54.81  | 34.68  | 78.20  | 64    |        |    |
| 2001                          | 387                |      |          | 265   | 477    | 60    | 44.59  | 30.50  | 54.93  | 72    |        |    |
| 2002                          | 448                |      |          | 240   | 632    | 59    | 49.55  | 26.49  | 69.85  | 64    |        |    |
| 2003                          | 451                |      |          | 218   | 625    | 59    | 48.06  | 23.21  | 66.68  | 65    |        |    |
| 2004                          | 458                |      |          | 198   | 622    | 59    | 47.20  | 20.41  | 64.14  | 65    |        |    |
| 2005                          | 475                |      |          | 181   | 630    | 59    | 47.33  | 18.02  | 62.82  | 66    |        |    |
| 2006                          | 504                |      |          | 166   | 697    | 60    | 48.94  | 16.12  | 67.70  | 65    |        |    |
| 2007                          | 549                | 152  | 813      | 60    | 52.37  | 14.49 | 77.58  | 62     |        |       |        |    |

| Metropolitan Statistical Area | PWID Population | Year   | Number | Min    | Max    | Rank   | Rate   | Min    | Max    | Rank  |    |
|-------------------------------|-----------------|--------|--------|--------|--------|--------|--------|--------|--------|-------|----|
| Detroit, MI                   | Male            | 1992   | 15,185 | 6,696  | 23,042 | 16     | 109.22 | 48.16  | 165.73 | 69    |    |
|                               |                 | 1993   | 15,751 | 7,755  | 22,731 | 13     | 112.88 | 55.58  | 162.89 | 60    |    |
|                               |                 | 1994   | 15,199 | 8,788  | 22,343 | 14     | 108.38 | 62.67  | 159.32 | 71    |    |
|                               |                 | 1995   | 16,566 | 9,828  | 21,947 | 13     | 117.11 | 69.48  | 155.14 | 57    |    |
|                               |                 | 1996   | 16,948 | 10,763 | 22,241 | 12     | 118.72 | 75.39  | 155.79 | 51    |    |
|                               |                 | 1997   | 17,154 | 11,596 | 23,495 | 12     | 119.91 | 81.06  | 164.24 | 49    |    |
|                               |                 | 1998   | 17,404 | 11,738 | 24,557 | 12     | 121.63 | 82.03  | 171.62 | 49    |    |
|                               |                 | 1999   | 15,006 | 11,879 | 19,556 | 12     | 104.68 | 82.87  | 136.41 | 62    |    |
|                               |                 | 2000   | 17,448 | 11,041 | 24,895 | 12     | 121.32 | 76.77  | 173.10 | 51    |    |
|                               |                 | 2001   | 14,994 | 10,257 | 18,472 | 14     | 103.50 | 70.80  | 127.51 | 63    |    |
|                               |                 | 2002   | 17,350 | 9,276  | 24,457 | 12     | 119.20 | 63.73  | 168.03 | 48    |    |
|                               |                 | 2003   | 17,248 | 8,328  | 23,929 | 13     | 117.79 | 56.88  | 163.42 | 48    |    |
|                               |                 | 2004   | 17,041 | 7,370  | 23,157 | 13     | 115.79 | 50.08  | 157.35 | 53    |    |
|                               |                 | 2005   | 16,894 | 6,433  | 22,420 | 13     | 114.18 | 43.48  | 151.53 | 53    |    |
|                               | 2006            | 16,792 | 5,533  | 23,229 | 14     | 113.16 | 37.28  | 156.54 | 52     |       |    |
|                               | 2007            | 16,667 | 4,611  | 24,689 | 14     | 112.72 | 31.19  | 166.97 | 49     |       |    |
|                               |                 | Female | 1992   | 8,139  | 3,589  | 12,350 | 17     | 55.69  | 24.55  | 84.50 | 67 |
|                               |                 |        | 1993   | 8,410  | 4,141  | 12,136 | 18     | 57.54  | 28.33  | 83.03 | 62 |
|                               |                 |        | 1994   | 8,156  | 4,716  | 11,989 | 16     | 55.69  | 32.20  | 81.86 | 71 |
|                               |                 |        | 1995   | 8,998  | 5,338  | 11,920 | 15     | 61.12  | 36.26  | 80.97 | 58 |
|                               |                 |        | 1996   | 9,367  | 5,948  | 12,291 | 14     | 63.21  | 40.14  | 82.95 | 56 |
|                               | 1997            |        | 9,679  | 6,543  | 13,257 | 11     | 65.33  | 44.17  | 89.49  | 56    |    |
|                               | 1998            |        | 10,044 | 6,774  | 14,172 | 8      | 67.92  | 45.80  | 95.83  | 53    |    |
|                               | 1999            | 8,858  | 7,012  | 11,544 | 12     | 59.95  | 47.45  | 78.12  | 61     |       |    |
|                               | 2000            | 10,517 | 6,655  | 15,005 | 9      | 71.02  | 44.94  | 101.33 | 49     |       |    |
|                               | 2001            | 9,196  | 6,291  | 11,329 | 11     | 61.77  | 42.26  | 76.10  | 59     |       |    |
|                               | 2002            | 10,771 | 5,758  | 15,182 | 9      | 72.10  | 38.55  | 101.64 | 46     |       |    |
|                               | 2003            | 10,760 | 5,196  | 14,929 | 9      | 71.77  | 34.66  | 99.57  | 44     |       |    |
|                               | 2004            | 10,588 | 4,579  | 14,389 | 9      | 70.33  | 30.42  | 95.57  | 48     |       |    |
|                               | 2005            | 10,342 | 3,938  | 13,725 | 11     | 68.42  | 26.05  | 90.80  | 48     |       |    |
|                               | 2006            | 9,999  | 3,294  | 13,832 | 11     | 66.03  | 21.75  | 91.34  | 48     |       |    |
|                               | 2007            | 9,514  | 2,632  | 14,093 | 12     | 63.06  | 17.45  | 93.40  | 49     |       |    |

| Metropolitan Statistical Area | PWID Population | Year  | Number      | Min    | Max    | Rank   | Rate   | Min   | Max    | Rank  |        |    |
|-------------------------------|-----------------|-------|-------------|--------|--------|--------|--------|-------|--------|-------|--------|----|
| Detroit, MI                   | Young (15-29)   | 1992  | 3,508       | 1,547  | 5,323  | 36     | 37.70  | 16.62 | 57.20  | 93    |        |    |
|                               |                 | 1993  | 3,521       | 1,733  | 5,080  | 29     | 38.47  | 18.94 | 55.51  | 85    |        |    |
|                               |                 | 1994  | 3,331       | 1,926  | 4,897  | 34     | 36.91  | 21.34 | 54.25  | 92    |        |    |
|                               |                 | 1995  | 3,608       | 2,141  | 4,780  | 28     | 40.18  | 23.84 | 53.23  | 84    |        |    |
|                               |                 | 1996  | 3,718       | 2,361  | 4,880  | 26     | 41.55  | 26.39 | 54.53  | 84    |        |    |
|                               |                 | 1997  | 3,842       | 2,597  | 5,263  | 25     | 43.34  | 29.30 | 59.36  | 83    |        |    |
|                               |                 | 1998  | 4,034       | 2,721  | 5,692  | 25     | 46.01  | 31.03 | 64.92  | 80    |        |    |
|                               |                 | 1999  | 3,647       | 2,887  | 4,753  | 29     | 42.14  | 33.36 | 54.92  | 89    |        |    |
|                               |                 | 2000  | 4,506       | 2,851  | 6,429  | 23     | 52.64  | 33.31 | 75.10  | 78    |        |    |
|                               |                 | 2001  | 4,167       | 2,850  | 5,133  | 28     | 49.39  | 33.79 | 60.85  | 85    |        |    |
|                               |                 | 2002  | 5,251       | 2,807  | 7,402  | 21     | 62.97  | 33.66 | 88.76  | 77    |        |    |
|                               |                 | 2003  | 5,748       | 2,775  | 7,974  | 19     | 69.03  | 33.33 | 95.76  | 73    |        |    |
|                               |                 | 2004  | 6,313       | 2,730  | 8,579  | 17     | 75.86  | 32.81 | 103.08 | 67    |        |    |
|                               |                 | 2005  | 7,011       | 2,670  | 9,305  | 16     | 83.76  | 31.90 | 111.16 | 63    |        |    |
|                               |                 | 2006  | 7,847       | 2,585  | 10,855 | 13     | 93.28  | 30.73 | 129.04 | 53    |        |    |
|                               |                 | 2007  | 8,789       | 2,432  | 13,019 | 12     | 104.79 | 28.99 | 155.22 | 41    |        |    |
|                               |                 |       | Old (30-64) | 1992   | 20,079 | 8,853  | 30,469 | 11    | 104.51 | 46.08 | 158.58 | 60 |
|                               |                 |       |             | 1993   | 20,764 | 10,223 | 29,965 | 13    | 106.93 | 52.65 | 154.31 | 53 |
|                               |                 |       |             | 1994   | 20,045 | 11,590 | 29,466 | 11    | 102.04 | 59.00 | 150.00 | 59 |
|                               |                 |       |             | 1995   | 21,914 | 13,001 | 29,031 | 9     | 110.19 | 65.37 | 145.97 | 47 |
| 1996                          | 22,521          |       |             | 14,302 | 29,553 | 8      | 111.79 | 70.99 | 146.70 | 46    |        |    |
| 1997                          | 22,907          |       |             | 15,485 | 31,375 | 8      | 113.09 | 76.45 | 154.90 | 44    |        |    |
| 1998                          | 23,341          |       |             | 15,742 | 32,933 | 8      | 114.80 | 77.43 | 161.98 | 42    |        |    |
| 1999                          | 20,172          |       |             | 15,968 | 26,287 | 12     | 98.60  | 78.05 | 128.49 | 55    |        |    |
| 2000                          | 23,427          |       |             | 14,824 | 33,426 | 11     | 113.56 | 71.86 | 162.03 | 40    |        |    |
| 2001                          | 20,006          |       |             | 13,685 | 24,645 | 12     | 95.55  | 65.36 | 117.71 | 52    |        |    |
| 2002                          | 22,838          |       |             | 12,210 | 32,193 | 9      | 107.96 | 57.72 | 152.18 | 40    |        |    |
| 2003                          | 22,179          |       |             | 10,709 | 30,770 | 9      | 104.09 | 50.26 | 144.41 | 41    |        |    |
| 2004                          | 21,128          |       |             | 9,137  | 28,711 | 9      | 98.50  | 42.60 | 133.85 | 44    |        |    |
| 2005                          | 19,847          |       |             | 7,557  | 26,339 | 11     | 92.13  | 35.08 | 122.27 | 43    |        |    |
| 2006                          | 18,265          |       |             | 6,018  | 25,266 | 12     | 84.67  | 27.90 | 117.13 | 48    |        |    |
| 2007                          | 16,284          | 4,505 | 24,122      | 14     | 75.78  | 20.97  | 112.26 | 53    |        |       |        |    |



| Metropolitan Statistical Area | PWID Population | Year | Number             | Min    | Max    | Rank  | Rate   | Min    | Max    | Rank   |        |   |
|-------------------------------|-----------------|------|--------------------|--------|--------|-------|--------|--------|--------|--------|--------|---|
| El Paso, TX                   | Total           | 1992 | 13,765             | 11,925 | 17,071 | 35    | 345.18 | 299.02 | 428.07 | 1      |        |   |
|                               |                 | 1993 | 11,099             | 4,805  | 16,633 | 38    | 272.08 | 117.78 | 407.75 | 4      |        |   |
|                               |                 | 1994 | 12,526             | 10,434 | 16,080 | 36    | 302.24 | 251.76 | 388.00 | 2      |        |   |
|                               |                 | 1995 | 10,050             | 4,753  | 15,443 | 42    | 239.65 | 113.33 | 368.24 | 5      |        |   |
|                               |                 | 1996 | 9,434              | 4,666  | 14,685 | 44    | 224.77 | 111.17 | 349.86 | 6      |        |   |
|                               |                 | 1997 | 8,937              | 4,620  | 14,078 | 45    | 210.43 | 108.79 | 331.48 | 7      |        |   |
|                               |                 | 1998 | 8,436              | 4,555  | 13,484 | 46    | 197.05 | 106.40 | 314.95 | 8      |        |   |
|                               |                 | 1999 | 9,064              | 6,298  | 12,828 | 46    | 210.86 | 146.50 | 298.42 | 6      |        |   |
|                               |                 | 2000 | 7,490              | 4,389  | 12,409 | 51    | 172.92 | 101.33 | 286.50 | 9      |        |   |
|                               |                 | 2001 | 7,986              | 5,142  | 11,967 | 49    | 183.22 | 117.97 | 274.57 | 10     |        |   |
|                               |                 | 2002 | 6,539              | 3,790  | 11,514 | 63    | 149.10 | 86.43  | 262.54 | 18     |        |   |
|                               |                 | 2003 | 6,080              | 3,489  | 11,067 | 67    | 137.63 | 78.98  | 250.51 | 22     |        |   |
|                               |                 | 2004 | 5,651              | 3,198  | 10,694 | 73    | 126.53 | 71.61  | 239.46 | 27     |        |   |
|                               |                 | 2005 | 5,204              | 2,854  | 10,294 | 76    | 115.46 | 63.32  | 228.41 | 31     |        |   |
|                               |                 | 2006 | 4,796              | 2,526  | 9,987  | 81    | 104.51 | 55.04  | 217.63 | 40     |        |   |
|                               |                 | 2007 | 4,325              | 2,126  | 9,583  | 84    | 93.36  | 45.90  | 206.86 | 49     |        |   |
|                               |                 |      | Non-Hispanic White | 1992   | 2,129  | 1,844 | 2,640  | 79     | 219.19 | 189.87 | 271.82 | 5 |
|                               |                 |      |                    | 1993   | 1,752  | 759   | 2,626  | 83     | 182.45 | 78.98  | 273.43 | 7 |
|                               |                 |      |                    | 1994   | 1,979  | 1,648 | 2,540  | 83     | 212.11 | 176.68 | 272.29 | 5 |
|                               |                 |      |                    | 1995   | 1,561  | 738   | 2,399  | 88     | 171.82 | 81.25  | 264.02 | 6 |
| 1996                          | 1,419           |      |                    | 702    | 2,208  | 92    | 162.70 | 80.47  | 253.25 | 6      |        |   |
| 1997                          | 1,284           |      |                    | 664    | 2,023  | 94    | 151.45 | 78.29  | 238.57 | 11     |        |   |
| 1998                          | 1,145           |      |                    | 618    | 1,830  | 96    | 139.23 | 75.18  | 222.54 | 13     |        |   |
| 1999                          | 1,152           |      |                    | 801    | 1,631  | 98    | 145.21 | 100.88 | 205.51 | 9      |        |   |
| 2000                          | 886             |      |                    | 519    | 1,468  | 100   | 115.32 | 67.58  | 191.07 | 21     |        |   |
| 2001                          | 876             |      |                    | 564    | 1,312  | 100   | 116.37 | 74.93  | 174.39 | 23     |        |   |
| 2002                          | 664             |      |                    | 385    | 1,169  | 100   | 90.52  | 52.47  | 159.39 | 38     |        |   |
| 2003                          | 572             |      |                    | 328    | 1,042  | 100   | 80.96  | 46.46  | 147.37 | 43     |        |   |
| 2004                          | 496             |      |                    | 281    | 938    | 100   | 70.98  | 40.17  | 134.33 | 54     |        |   |
| 2005                          | 429             |      |                    | 235    | 848    | 100   | 62.92  | 34.51  | 124.48 | 65     |        |   |
| 2006                          | 375             |      |                    | 198    | 782    | 100   | 54.80  | 28.86  | 114.12 | 71     |        |   |
| 2007                          | 326             | 160  | 723                | 100    | 48.93  | 24.06 | 108.41 | 79     |        |        |        |   |

| Metropolitan Statistical Area | PWID Population    | Year  | Number   | Min   | Max    | Rank  | Rate   | Min    | Max    | Rank   |        |    |
|-------------------------------|--------------------|-------|----------|-------|--------|-------|--------|--------|--------|--------|--------|----|
| El Paso, TX                   | Non-Hispanic Black | 1992  | 772      | 669   | 957    | 85    | 549.62 | 476.12 | 681.59 | 13     |        |    |
|                               |                    | 1993  | 549      | 237   | 822    | 91    | 387.58 | 167.78 | 580.86 | 29     |        |    |
|                               |                    | 1994  | 569      | 474   | 730    | 88    | 415.28 | 345.92 | 533.11 | 20     |        |    |
|                               |                    | 1995  | 434      | 205   | 667    | 92    | 318.02 | 150.39 | 488.65 | 32     |        |    |
|                               |                    | 1996  | 400      | 198   | 623    | 93    | 297.69 | 147.24 | 463.36 | 32     |        |    |
|                               |                    | 1997  | 382      | 198   | 602    | 92    | 284.99 | 147.33 | 448.94 | 27     |        |    |
|                               |                    | 1998  | 371      | 200   | 593    | 92    | 278.21 | 150.22 | 444.68 | 25     |        |    |
|                               |                    | 1999  | 417      | 289   | 590    | 89    | 314.46 | 218.48 | 445.05 | 16     |        |    |
|                               |                    | 2000  | 363      | 213   | 602    | 92    | 276.76 | 162.18 | 458.54 | 20     |        |    |
|                               |                    | 2001  | 411      | 265   | 616    | 90    | 318.95 | 205.36 | 477.97 | 12     |        |    |
|                               |                    | 2002  | 357      | 207   | 628    | 92    | 277.16 | 160.66 | 488.02 | 13     |        |    |
|                               |                    | 2003  | 350      | 201   | 636    | 92    | 281.36 | 161.47 | 512.13 | 14     |        |    |
|                               |                    | 2004  | 339      | 192   | 641    | 92    | 268.08 | 151.71 | 507.33 | 16     |        |    |
|                               |                    | 2005  | 321      | 176   | 634    | 92    | 253.76 | 139.17 | 502.00 | 17     |        |    |
|                               |                    | 2006  | 298      | 157   | 620    | 94    | 222.38 | 117.11 | 463.11 | 23     |        |    |
|                               |                    | 2007  | 265      | 130   | 588    | 97    | 200.27 | 98.46  | 443.73 | 35     |        |    |
|                               |                    |       | Hispanic | 1992  | 10,516 | 9,110 | 13,041 | 6      | 373.52 | 323.57 | 463.21 | 11 |
|                               |                    |       |          | 1993  | 8,379  | 3,627 | 12,558 | 7      | 287.55 | 124.48 | 430.93 | 16 |
|                               |                    |       |          | 1994  | 9,378  | 7,812 | 12,039 | 5      | 311.55 | 259.51 | 399.94 | 13 |
|                               |                    |       |          | 1995  | 7,488  | 3,541 | 11,506 | 8      | 242.89 | 114.86 | 373.21 | 19 |
| 1996                          | 7,019              |       |          | 3,472 | 10,925 | 11    | 224.63 | 111.10 | 349.64 | 18     |        |    |
| 1997                          | 6,660              |       |          | 3,443 | 10,491 | 11    | 208.24 | 107.65 | 328.03 | 19     |        |    |
| 1998                          | 6,315              |       |          | 3,410 | 10,093 | 11    | 193.82 | 104.66 | 309.80 | 20     |        |    |
| 1999                          | 6,832              |       |          | 4,747 | 9,669  | 9     | 206.73 | 143.62 | 292.57 | 18     |        |    |
| 2000                          | 5,696              |       |          | 3,338 | 9,437  | 11    | 169.30 | 99.21  | 280.50 | 20     |        |    |
| 2001                          | 6,136              |       |          | 3,951 | 9,196  | 13    | 180.05 | 115.93 | 269.82 | 19     |        |    |
| 2002                          | 5,082              |       |          | 2,946 | 8,949  | 15    | 147.22 | 85.34  | 259.23 | 22     |        |    |
| 2003                          | 4,783              |       |          | 2,745 | 8,706  | 16    | 136.12 | 78.12  | 247.77 | 25     |        |    |
| 2004                          | 4,501              |       |          | 2,547 | 8,517  | 16    | 126.20 | 71.42  | 238.83 | 27     |        |    |
| 2005                          | 4,195              |       |          | 2,301 | 8,299  | 16    | 115.82 | 63.52  | 229.12 | 32     |        |    |
| 2006                          | 3,911              | 2,060 | 8,145    | 17    | 105.98 | 55.81 | 220.70 | 34     |        |        |        |    |
| 2007                          | 3,565              | 1,753 | 7,899    | 22    | 95.00  | 46.71 | 210.49 | 39     |        |        |        |    |

| Metropolitan Statistical Area | PWID Population | Year   | Number | Min   | Max    | Rank   | Rate   | Min    | Max    | Rank   |    |
|-------------------------------|-----------------|--------|--------|-------|--------|--------|--------|--------|--------|--------|----|
| El Paso, TX                   | Male            | 1992   | 10,831 | 9,382 | 13,431 | 31     | 561.22 | 486.16 | 695.98 | 1      |    |
|                               |                 | 1993   | 8,728  | 3,778 | 13,080 | 33     | 441.62 | 191.17 | 661.83 | 1      |    |
|                               |                 | 1994   | 9,826  | 8,185 | 12,615 | 31     | 491.26 | 409.21 | 630.65 | 1      |    |
|                               |                 | 1995   | 7,850  | 3,712 | 12,062 | 35     | 388.32 | 183.63 | 596.68 | 2      |    |
|                               |                 | 1996   | 7,322  | 3,621 | 11,396 | 36     | 362.12 | 179.11 | 563.65 | 2      |    |
|                               |                 | 1997   | 6,876  | 3,555 | 10,832 | 37     | 336.26 | 173.84 | 529.70 | 2      |    |
|                               |                 | 1998   | 6,420  | 3,467 | 10,262 | 39     | 311.58 | 168.24 | 498.02 | 4      |    |
|                               |                 | 1999   | 6,806  | 4,729 | 9,632  | 38     | 328.78 | 228.42 | 465.31 | 3      |    |
|                               |                 | 2000   | 5,533  | 3,242 | 9,167  | 45     | 265.26 | 155.44 | 439.49 | 7      |    |
|                               |                 | 2001   | 5,786  | 3,725 | 8,670  | 47     | 275.83 | 177.60 | 413.36 | 7      |    |
|                               |                 | 2002   | 4,630  | 2,684 | 8,152  | 51     | 219.41 | 127.19 | 386.34 | 12     |    |
|                               |                 | 2003   | 4,190  | 2,405 | 7,627  | 59     | 197.60 | 113.40 | 359.67 | 17     |    |
|                               |                 | 2004   | 3,773  | 2,135 | 7,141  | 66     | 175.90 | 99.54  | 332.88 | 21     |    |
|                               |                 | 2005   | 3,350  | 1,837 | 6,626  | 75     | 154.77 | 84.88  | 306.18 | 29     |    |
|                               | 2006            | 2,958  | 1,558  | 6,161 | 85     | 134.25 | 70.70  | 279.57 | 37     |        |    |
|                               | 2007            | 2,540  | 1,249  | 5,628 | 86     | 114.18 | 56.14  | 252.98 | 48     |        |    |
|                               |                 | Female | 1992   | 3,112 | 2,695  | 3,859  | 47     | 151.19 | 130.97 | 187.49 | 9  |
|                               |                 |        | 1993   | 2,471 | 1,070  | 3,703  | 58     | 117.50 | 50.86  | 176.09 | 22 |
|                               |                 |        | 1994   | 2,793 | 2,327  | 3,586  | 56     | 130.27 | 108.51 | 167.23 | 17 |
|                               |                 |        | 1995   | 2,279 | 1,078  | 3,501  | 62     | 104.90 | 49.60  | 161.18 | 24 |
|                               |                 |        | 1996   | 2,203 | 1,090  | 3,429  | 64     | 101.26 | 50.08  | 157.61 | 24 |
|                               |                 |        | 1997   | 2,172 | 1,123  | 3,422  | 65     | 98.64  | 50.99  | 155.38 | 24 |
|                               |                 |        | 1998   | 2,152 | 1,162  | 3,440  | 67     | 96.91  | 52.33  | 154.90 | 22 |
|                               |                 |        | 1999   | 2,442 | 1,697  | 3,456  | 63     | 109.58 | 76.13  | 155.08 | 18 |
|                               |                 |        | 2000   | 2,139 | 1,254  | 3,545  | 69     | 95.28  | 55.83  | 157.85 | 24 |
|                               |                 |        | 2001   | 2,423 | 1,560  | 3,631  | 64     | 107.16 | 69.00  | 160.59 | 20 |
|                               | 2002            |        | 2,107  | 1,221 | 3,710  | 71     | 92.61  | 53.68  | 163.06 | 25     |    |
|                               | 2003            |        | 2,077  | 1,192 | 3,781  | 73     | 90.43  | 51.89  | 164.59 | 26     |    |
|                               | 2004            | 2,040  | 1,154  | 3,860 | 75     | 87.90  | 49.74  | 166.35 | 28     |        |    |
|                               | 2005            | 1,975  | 1,083  | 3,908 | 78     | 84.33  | 46.25  | 166.82 | 27     |        |    |
|                               | 2006            | 1,903  | 1,002  | 3,964 | 79     | 79.80  | 42.02  | 166.17 | 34     |        |    |
|                               | 2007            | 1,782  | 876    | 3,949 | 80     | 74.01  | 36.39  | 163.98 | 37     |        |    |

| Metropolitan Statistical Area | PWID Population | Year        | Number | Min   | Max    | Rank   | Rate   | Min    | Max    | Rank   |   |
|-------------------------------|-----------------|-------------|--------|-------|--------|--------|--------|--------|--------|--------|---|
| El Paso, TX                   | Young (15-29)   | 1992        | 5,094  | 4,412 | 6,317  | 22     | 323.75 | 280.45 | 401.49 | 1      |   |
|                               |                 | 1993        | 3,823  | 1,655 | 5,729  | 27     | 241.08 | 104.36 | 361.30 | 2      |   |
|                               |                 | 1994        | 4,060  | 3,382 | 5,212  | 25     | 257.70 | 214.66 | 330.81 | 1      |   |
|                               |                 | 1995        | 3,102  | 1,467 | 4,767  | 32     | 196.72 | 93.03  | 302.28 | 5      |   |
|                               |                 | 1996        | 2,807  | 1,388 | 4,369  | 36     | 178.83 | 88.45  | 278.36 | 6      |   |
|                               |                 | 1997        | 2,594  | 1,341 | 4,086  | 39     | 164.07 | 84.82  | 258.46 | 8      |   |
|                               |                 | 1998        | 2,417  | 1,305 | 3,864  | 44     | 152.29 | 82.23  | 243.41 | 14     |   |
|                               |                 | 1999        | 2,594  | 1,802 | 3,672  | 47     | 163.75 | 113.77 | 231.75 | 15     |   |
|                               |                 | 2000        | 2,165  | 1,269 | 3,587  | 55     | 136.79 | 80.15  | 226.63 | 24     |   |
|                               |                 | 2001        | 2,356  | 1,517 | 3,530  | 55     | 149.09 | 95.99  | 223.42 | 22     |   |
|                               |                 | 2002        | 1,987  | 1,152 | 3,499  | 65     | 126.41 | 73.28  | 222.58 | 29     |   |
|                               |                 | 2003        | 1,920  | 1,102 | 3,495  | 70     | 122.49 | 70.30  | 222.96 | 31     |   |
|                               |                 | 2004        | 1,869  | 1,058 | 3,537  | 75     | 118.36 | 66.98  | 223.99 | 35     |   |
|                               |                 | 2005        | 1,814  | 995   | 3,588  | 75     | 114.32 | 62.69  | 226.14 | 37     |   |
|                               | 2006            | 1,770       | 932    | 3,687 | 77     | 109.37 | 57.60  | 227.76 | 40     |        |   |
|                               | 2007            | 1,697       | 835    | 3,761 | 81     | 103.88 | 51.08  | 230.18 | 42     |        |   |
|                               |                 | Old (30-64) | 1992   | 8,760 | 7,588  | 10,863 | 38     | 362.78 | 314.27 | 449.89 | 1 |
|                               |                 |             | 1993   | 7,279 | 3,151  | 10,909 | 42     | 291.89 | 126.36 | 437.44 | 5 |
|                               |                 |             | 1994   | 8,447 | 7,037  | 10,844 | 41     | 328.84 | 273.92 | 422.14 | 2 |
|                               |                 |             | 1995   | 6,950 | 3,287  | 10,679 | 42     | 265.58 | 125.59 | 408.09 | 6 |
|                               |                 |             | 1996   | 6,667 | 3,298  | 10,377 | 43     | 253.70 | 125.48 | 394.88 | 6 |
| 1997                          |                 |             | 6,428  | 3,323 | 10,126 | 46     | 241.10 | 124.64 | 379.80 | 7      |   |
| 1998                          |                 |             | 6,149  | 3,320 | 9,828  | 46     | 228.24 | 123.24 | 364.81 | 7      |   |
| 1999                          |                 |             | 6,661  | 4,628 | 9,427  | 45     | 245.40 | 170.49 | 347.30 | 5      |   |
| 2000                          |                 |             | 5,520  | 3,234 | 9,145  | 53     | 200.81 | 117.67 | 332.71 | 8      |   |
| 2001                          |                 |             | 5,866  | 3,777 | 8,791  | 51     | 211.13 | 135.94 | 316.39 | 7      |   |
| 2002                          |                 |             | 4,755  | 2,757 | 8,373  | 57     | 169.03 | 97.98  | 297.62 | 11     |   |
| 2003                          |                 |             | 4,342  | 2,492 | 7,903  | 64     | 152.35 | 87.43  | 277.31 | 15     |   |
| 2004                          |                 |             | 3,923  | 2,220 | 7,425  | 65     | 135.91 | 76.91  | 257.20 | 20     |   |
| 2005                          |                 |             | 3,467  | 1,901 | 6,859  | 76     | 118.73 | 65.11  | 234.88 | 27     |   |
| 2006                          | 3,014           | 1,587       | 6,277  | 78    | 101.48 | 53.45  | 211.34 | 34     |        |        |   |
| 2007                          | 2,506           | 1,232       | 5,552  | 85    | 83.56  | 41.08  | 185.14 | 45     |        |        |   |

| Metropolitan Statistical Area | PWID Population | Year  | Number             | Min   | Max    | Rank  | Rate   | Min   | Max    | Rank  |        |    |
|-------------------------------|-----------------|-------|--------------------|-------|--------|-------|--------|-------|--------|-------|--------|----|
| Fort Lauderdale, FL           | Total           | 1992  | 9,119              | 6,482 | 12,521 | 49    | 111.64 | 79.36 | 153.28 | 48    |        |    |
|                               |                 | 1993  | 7,422              | 2,884 | 11,768 | 55    | 87.86  | 34.15 | 139.32 | 57    |        |    |
|                               |                 | 1994  | 8,759              | 6,352 | 10,940 | 52    | 100.47 | 72.86 | 125.49 | 50    |        |    |
|                               |                 | 1995  | 7,226              | 3,059 | 10,127 | 56    | 80.49  | 34.07 | 112.80 | 66    |        |    |
|                               |                 | 1996  | 7,321              | 3,149 | 9,693  | 54    | 79.29  | 34.11 | 104.98 | 65    |        |    |
|                               |                 | 1997  | 7,592              | 3,271 | 10,105 | 50    | 79.37  | 34.20 | 105.65 | 65    |        |    |
|                               |                 | 1998  | 7,872              | 3,388 | 10,228 | 49    | 79.70  | 34.30 | 103.54 | 64    |        |    |
|                               |                 | 1999  | 9,504              | 7,479 | 11,226 | 44    | 93.59  | 73.65 | 110.55 | 55    |        |    |
|                               |                 | 2000  | 7,807              | 3,507 | 11,830 | 48    | 74.53  | 33.48 | 112.94 | 66    |        |    |
|                               |                 | 2001  | 8,655              | 6,411 | 11,482 | 48    | 80.34  | 59.51 | 106.57 | 61    |        |    |
|                               |                 | 2002  | 6,970              | 3,765 | 10,383 | 55    | 63.16  | 34.12 | 94.09  | 76    |        |    |
|                               |                 | 2003  | 6,609              | 3,867 | 8,812  | 60    | 58.86  | 34.44 | 78.48  | 78    |        |    |
|                               |                 | 2004  | 6,472              | 3,946 | 9,672  | 60    | 56.61  | 34.51 | 84.60  | 82    |        |    |
|                               |                 | 2005  | 6,581              | 4,035 | 11,137 | 63    | 56.48  | 34.63 | 95.57  | 82    |        |    |
|                               |                 | 2006  | 6,638              | 4,062 | 12,508 | 64    | 56.77  | 34.74 | 106.98 | 82    |        |    |
|                               |                 | 2007  | 6,664              | 3,588 | 13,753 | 63    | 57.42  | 30.92 | 118.52 | 83    |        |    |
|                               |                 |       | Non-Hispanic White | 1992  | 6,265  | 4,454 | 8,602  | 36    | 110.24 | 78.37 | 151.36 | 35 |
|                               |                 |       |                    | 1993  | 5,139  | 1,997 | 8,148  | 41    | 89.58  | 34.81 | 142.04 | 38 |
|                               |                 |       |                    | 1994  | 6,030  | 4,373 | 7,531  | 37    | 104.29 | 75.63 | 130.26 | 33 |
|                               |                 |       |                    | 1995  | 4,894  | 2,072 | 6,858  | 43    | 84.38  | 35.72 | 118.25 | 46 |
| 1996                          | 4,837           |       |                    | 2,080 | 6,404  | 43    | 83.31  | 35.83 | 110.30 | 48    |        |    |
| 1997                          | 4,862           |       |                    | 2,095 | 6,472  | 40    | 83.05  | 35.79 | 110.55 | 48    |        |    |
| 1998                          | 4,869           |       |                    | 2,095 | 6,326  | 37    | 82.71  | 35.59 | 107.45 | 48    |        |    |
| 1999                          | 5,673           |       |                    | 4,464 | 6,701  | 36    | 96.54  | 75.97 | 114.03 | 33    |        |    |
| 2000                          | 4,513           |       |                    | 2,027 | 6,838  | 42    | 76.47  | 34.36 | 115.87 | 51    |        |    |
| 2001                          | 4,881           |       |                    | 3,616 | 6,475  | 43    | 82.77  | 61.31 | 109.81 | 45    |        |    |
| 2002                          | 3,883           |       |                    | 2,098 | 5,785  | 54    | 66.13  | 35.72 | 98.52  | 59    |        |    |
| 2003                          | 3,698           |       |                    | 2,163 | 4,930  | 58    | 63.60  | 37.21 | 84.79  | 63    |        |    |
| 2004                          | 3,709           |       |                    | 2,261 | 5,543  | 62    | 64.42  | 39.27 | 96.27  | 63    |        |    |
| 2005                          | 3,944           |       |                    | 2,418 | 6,674  | 58    | 68.99  | 42.30 | 116.75 | 55    |        |    |
| 2006                          | 4,241           | 2,595 | 7,991              | 57    | 75.75  | 46.35 | 142.74 | 52    |        |       |        |    |
| 2007                          | 4,606           | 2,480 | 9,506              | 55    | 84.79  | 45.65 | 175.00 | 44    |        |       |        |    |

| Metropolitan Statistical Area | PWID Population    | Year | Number   | Min   | Max   | Rank  | Rate   | Min    | Max    | Rank  |       |    |
|-------------------------------|--------------------|------|----------|-------|-------|-------|--------|--------|--------|-------|-------|----|
| Fort Lauderdale, FL           | Non-Hispanic Black | 1992 | 2,252    | 1,601 | 3,092 | 49    | 162.01 | 115.16 | 222.43 | 85    |       |    |
|                               |                    | 1993 | 1,647    | 640   | 2,612 | 56    | 110.20 | 42.83  | 174.74 | 93    |       |    |
|                               |                    | 1994 | 1,846    | 1,339 | 2,306 | 58    | 115.23 | 83.57  | 143.92 | 94    |       |    |
|                               |                    | 1995 | 1,515    | 641   | 2,124 | 58    | 88.63  | 37.52  | 124.20 | 94    |       |    |
|                               |                    | 1996 | 1,583    | 681   | 2,096 | 56    | 87.17  | 37.49  | 115.41 | 94    |       |    |
|                               |                    | 1997 | 1,733    | 747   | 2,307 | 52    | 89.04  | 38.37  | 118.52 | 93    |       |    |
|                               |                    | 1998 | 1,920    | 826   | 2,495 | 45    | 92.61  | 39.85  | 120.31 | 91    |       |    |
|                               |                    | 1999 | 2,479    | 1,951 | 2,929 | 36    | 112.94 | 88.87  | 133.40 | 84    |       |    |
|                               |                    | 2000 | 2,157    | 969   | 3,268 | 35    | 93.59  | 42.04  | 141.81 | 87    |       |    |
|                               |                    | 2001 | 2,483    | 1,840 | 3,294 | 32    | 102.94 | 76.25  | 136.56 | 83    |       |    |
|                               |                    | 2002 | 2,018    | 1,090 | 3,006 | 37    | 80.12  | 43.28  | 119.36 | 89    |       |    |
|                               |                    | 2003 | 1,858    | 1,087 | 2,477 | 39    | 71.18  | 41.64  | 94.91  | 91    |       |    |
|                               |                    | 2004 | 1,680    | 1,025 | 2,511 | 43    | 61.93  | 37.76  | 92.56  | 91    |       |    |
|                               |                    | 2005 | 1,481    | 908   | 2,507 | 52    | 52.66  | 32.28  | 89.10  | 94    |       |    |
|                               |                    | 2006 | 1,195    | 731   | 2,253 | 62    | 41.61  | 25.46  | 78.41  | 99    |       |    |
|                               |                    | 2007 | 870      | 468   | 1,795 | 72    | 30.10  | 16.20  | 62.11  | 99    |       |    |
|                               |                    |      | Hispanic | 1992  | 550   | 391   | 755    | 51     | 59.39  | 42.21 | 81.54 | 78 |
|                               |                    |      |          | 1993  | 464   | 180   | 736    | 52     | 45.20  | 17.56 | 71.66 | 85 |
|                               |                    |      |          | 1994  | 573   | 415   | 716    | 51     | 50.83  | 36.86 | 63.49 | 82 |
|                               |                    |      |          | 1995  | 497   | 210   | 696    | 52     | 40.07  | 16.96 | 56.16 | 85 |
| 1996                          | 531                |      |          | 228   | 703   | 52    | 38.96  | 16.76  | 51.57  | 84    |       |    |
| 1997                          | 582                |      |          | 251   | 775   | 52    | 38.98  | 16.80  | 51.88  | 81    |       |    |
| 1998                          | 638                |      |          | 275   | 829   | 52    | 39.28  | 16.90  | 51.03  | 79    |       |    |
| 1999                          | 813                |      |          | 640   | 961   | 45    | 45.98  | 36.18  | 54.31  | 76    |       |    |
| 2000                          | 704                |      |          | 316   | 1,066 | 51    | 36.43  | 16.37  | 55.21  | 77    |       |    |
| 2001                          | 818                |      |          | 606   | 1,086 | 48    | 38.86  | 28.79  | 51.56  | 78    |       |    |
| 2002                          | 688                |      |          | 371   | 1,024 | 54    | 30.34  | 16.39  | 45.21  | 82    |       |    |
| 2003                          | 676                |      |          | 396   | 902   | 54    | 28.08  | 16.43  | 37.44  | 83    |       |    |
| 2004                          | 682                |      |          | 416   | 1,019 | 54    | 26.77  | 16.32  | 40.01  | 84    |       |    |
| 2005                          | 709                |      |          | 435   | 1,200 | 54    | 26.34  | 16.15  | 44.57  | 85    |       |    |
| 2006                          | 725                | 444  | 1,366    | 55    | 26.05 | 15.94 | 49.10  | 84     |        |       |       |    |
| 2007                          | 731                | 394  | 1,510    | 55    | 25.71 | 13.84 | 53.06  | 86     |        |       |       |    |

| Metropolitan Statistical Area | PWID Population | Year   | Number | Min   | Max   | Rank  | Rate   | Min    | Max    | Rank   |    |
|-------------------------------|-----------------|--------|--------|-------|-------|-------|--------|--------|--------|--------|----|
| Fort Lauderdale, FL           | Male            | 1992   | 5,957  | 4,235 | 8,179 | 48    | 147.46 | 104.82 | 202.46 | 47     |    |
|                               |                 | 1993   | 4,857  | 1,888 | 7,702 | 52    | 116.28 | 45.19  | 184.38 | 57     |    |
|                               |                 | 1994   | 5,725  | 4,152 | 7,150 | 48    | 132.89 | 96.37  | 165.97 | 51     |    |
|                               |                 | 1995   | 4,704  | 1,991 | 6,592 | 53    | 106.10 | 44.91  | 148.69 | 64     |    |
|                               |                 | 1996   | 4,736  | 2,037 | 6,270 | 52    | 103.91 | 44.69  | 137.57 | 64     |    |
|                               |                 | 1997   | 4,872  | 2,100 | 6,486 | 51    | 103.20 | 44.47  | 137.37 | 64     |    |
|                               |                 | 1998   | 5,007  | 2,155 | 6,505 | 49    | 102.78 | 44.23  | 133.52 | 62     |    |
|                               |                 | 1999   | 5,986  | 4,711 | 7,071 | 44    | 119.61 | 94.12  | 141.28 | 54     |    |
|                               |                 | 2000   | 4,870  | 2,188 | 7,379 | 49    | 94.39  | 42.40  | 143.02 | 66     |    |
|                               |                 | 2001   | 5,350  | 3,963 | 7,097 | 49    | 100.76 | 74.64  | 133.66 | 64     |    |
|                               |                 | 2002   | 4,274  | 2,309 | 6,367 | 59    | 78.59  | 42.46  | 117.09 | 74     |    |
|                               |                 | 2003   | 4,029  | 2,357 | 5,371 | 63    | 72.76  | 42.56  | 97.01  | 79     |    |
|                               |                 | 2004   | 3,931  | 2,397 | 5,876 | 64    | 69.71  | 42.50  | 104.19 | 84     |    |
|                               |                 | 2005   | 3,997  | 2,451 | 6,764 | 62    | 69.54  | 42.63  | 117.66 | 84     |    |
|                               | 2006            | 4,047  | 2,476  | 7,625 | 62    | 70.16 | 42.93  | 132.21 | 83     |        |    |
|                               | 2007            | 4,096  | 2,205  | 8,453 | 63    | 71.51 | 38.50  | 147.58 | 80     |        |    |
|                               |                 | Female | 1992   | 3,139 | 2,232 | 4,310 | 46     | 76.04  | 54.05  | 104.40 | 45 |
|                               |                 |        | 1993   | 2,553 | 992   | 4,048 | 56     | 59.78  | 23.23  | 94.80  | 58 |
|                               |                 |        | 1994   | 3,023 | 2,192 | 3,776 | 48     | 68.55  | 49.71  | 85.62  | 56 |
|                               |                 |        | 1995   | 2,511 | 1,063 | 3,520 | 56     | 55.27  | 23.39  | 77.45  | 64 |
|                               |                 |        | 1996   | 2,570 | 1,105 | 3,402 | 54     | 54.97  | 23.64  | 72.77  | 63 |
|                               |                 |        | 1997   | 2,697 | 1,162 | 3,590 | 53     | 55.67  | 23.99  | 74.11  | 63 |
|                               |                 |        | 1998   | 2,834 | 1,220 | 3,682 | 51     | 56.61  | 24.36  | 73.55  | 63 |
|                               |                 |        | 1999   | 3,469 | 2,730 | 4,098 | 42     | 67.37  | 53.01  | 79.57  | 56 |
|                               |                 |        | 2000   | 2,890 | 1,298 | 4,380 | 49     | 54.38  | 24.43  | 82.39  | 66 |
|                               |                 |        | 2001   | 3,247 | 2,405 | 4,307 | 46     | 59.42  | 44.02  | 78.83  | 63 |
|                               | 2002            |        | 2,646  | 1,429 | 3,942 | 56    | 47.27  | 25.54  | 70.42  | 76     |    |
|                               | 2003            |        | 2,534  | 1,483 | 3,379 | 62    | 44.53  | 26.05  | 59.37  | 82     |    |
|                               | 2004            | 2,500  | 1,524  | 3,737 | 63    | 43.15 | 26.31  | 64.49  | 82     |        |    |
|                               | 2005            | 2,553  | 1,565  | 4,321 | 62    | 43.25 | 26.51  | 73.18  | 83     |        |    |
|                               | 2006            | 2,577  | 1,577  | 4,855 | 60    | 43.50 | 26.61  | 81.96  | 81     |        |    |
|                               | 2007            | 2,577  | 1,387  | 5,318 | 60    | 43.85 | 23.61  | 90.51  | 81     |        |    |

| Metropolitan Statistical Area | PWID Population | Year  | Number      | Min   | Max   | Rank  | Rate   | Min   | Max    | Rank  |        |    |
|-------------------------------|-----------------|-------|-------------|-------|-------|-------|--------|-------|--------|-------|--------|----|
| Fort Lauderdale, FL           | Young (15-29)   | 1992  | 1,810       | 1,287 | 2,485 | 61    | 73.39  | 52.17 | 100.77 | 60    |        |    |
|                               |                 | 1993  | 1,436       | 558   | 2,277 | 71    | 57.69  | 22.42 | 91.47  | 64    |        |    |
|                               |                 | 1994  | 1,701       | 1,234 | 2,125 | 65    | 67.84  | 49.20 | 84.73  | 62    |        |    |
|                               |                 | 1995  | 1,444       | 611   | 2,023 | 69    | 56.98  | 24.12 | 79.85  | 65    |        |    |
|                               |                 | 1996  | 1,534       | 660   | 2,031 | 67    | 59.65  | 25.66 | 78.97  | 64    |        |    |
|                               |                 | 1997  | 1,693       | 729   | 2,253 | 64    | 64.00  | 27.58 | 85.19  | 60    |        |    |
|                               |                 | 1998  | 1,885       | 811   | 2,449 | 60    | 69.30  | 29.82 | 90.04  | 59    |        |    |
|                               |                 | 1999  | 2,452       | 1,930 | 2,897 | 49    | 88.07  | 69.31 | 104.03 | 52    |        |    |
|                               |                 | 2000  | 2,170       | 975   | 3,288 | 53    | 76.07  | 34.17 | 115.26 | 58    |        |    |
|                               |                 | 2001  | 2,578       | 1,909 | 3,419 | 48    | 88.79  | 65.77 | 117.79 | 57    |        |    |
|                               |                 | 2002  | 2,204       | 1,191 | 3,284 | 58    | 74.64  | 40.32 | 111.20 | 66    |        |    |
|                               |                 | 2003  | 2,192       | 1,283 | 2,923 | 64    | 73.18  | 42.81 | 97.57  | 68    |        |    |
|                               |                 | 2004  | 2,217       | 1,351 | 3,313 | 65    | 72.62  | 44.27 | 108.52 | 75    |        |    |
|                               |                 | 2005  | 2,284       | 1,400 | 3,865 | 62    | 73.27  | 44.92 | 123.99 | 74    |        |    |
|                               |                 | 2006  | 2,283       | 1,397 | 4,301 | 65    | 73.15  | 44.76 | 137.85 | 71    |        |    |
|                               |                 | 2007  | 2,212       | 1,191 | 4,565 | 64    | 71.78  | 38.65 | 148.15 | 72    |        |    |
|                               |                 |       | Old (30-64) | 1992  | 7,377 | 5,244 | 10,129 | 45    | 129.38 | 91.97 | 177.64 | 46 |
|                               |                 |       |             | 1993  | 6,026 | 2,342 | 9,555  | 49    | 101.14 | 39.31 | 160.36 | 56 |
|                               |                 |       |             | 1994  | 7,093 | 5,143 | 8,858  | 46    | 114.20 | 82.81 | 142.62 | 47 |
|                               |                 |       |             | 1995  | 5,804 | 2,457 | 8,134  | 52    | 90.07  | 38.13 | 126.22 | 66 |
| 1996                          | 5,804           |       |             | 2,497 | 7,684 | 51    | 87.14  | 37.48 | 115.36 | 65    |        |    |
| 1997                          | 5,913           |       |             | 2,548 | 7,871 | 47    | 85.45  | 36.82 | 113.74 | 63    |        |    |
| 1998                          | 5,998           |       |             | 2,581 | 7,792 | 47    | 83.79  | 36.06 | 108.85 | 61    |        |    |
| 1999                          | 7,055           |       |             | 5,552 | 8,334 | 42    | 95.73  | 75.33 | 113.07 | 58    |        |    |
| 2000                          | 5,632           |       |             | 2,530 | 8,533 | 49    | 73.88  | 33.19 | 111.95 | 65    |        |    |
| 2001                          | 6,058           |       |             | 4,487 | 8,036 | 47    | 76.96  | 57.01 | 102.10 | 65    |        |    |
| 2002                          | 4,736           |       |             | 2,559 | 7,056 | 59    | 58.60  | 31.66 | 87.30  | 79    |        |    |
| 2003                          | 4,374           |       |             | 2,559 | 5,831 | 63    | 53.13  | 31.08 | 70.83  | 82    |        |    |
| 2004                          | 4,195           |       |             | 2,558 | 6,270 | 63    | 50.06  | 30.52 | 74.81  | 86    |        |    |
| 2005                          | 4,215           |       |             | 2,584 | 7,132 | 62    | 49.38  | 30.27 | 83.56  | 85    |        |    |
| 2006                          | 4,246           | 2,598 | 8,001       | 58    | 49.54 | 30.31 | 93.35  | 83    |        |       |        |    |
| 2007                          | 4,311           | 2,321 | 8,898       | 56    | 50.58 | 27.23 | 104.40 | 77    |        |       |        |    |



| Metropolitan Statistical Area | PWID Population | Year  | Number             | Min    | Max    | Rank   | Rate   | Min    | Max    | Rank   |        |    |
|-------------------------------|-----------------|-------|--------------------|--------|--------|--------|--------|--------|--------|--------|--------|----|
| Fort Worth--Arlington, TX     | Total           | 1992  | 23,902             | 22,297 | 26,911 | 14     | 249.44 | 232.69 | 280.85 | 5      |        |    |
|                               |                 | 1993  | 19,746             | 8,579  | 25,987 | 22     | 203.48 | 88.40  | 267.80 | 14     |        |    |
|                               |                 | 1994  | 23,252             | 21,780 | 25,280 | 14     | 234.29 | 219.47 | 254.74 | 6      |        |    |
|                               |                 | 1995  | 19,477             | 8,807  | 24,544 | 19     | 191.78 | 86.72  | 241.68 | 11     |        |    |
|                               |                 | 1996  | 19,316             | 8,909  | 23,763 | 19     | 186.03 | 85.80  | 228.87 | 10     |        |    |
|                               |                 | 1997  | 19,243             | 9,049  | 23,444 | 19     | 180.31 | 84.79  | 219.68 | 10     |        |    |
|                               |                 | 1998  | 19,105             | 9,193  | 23,423 | 19     | 174.11 | 83.78  | 213.46 | 10     |        |    |
|                               |                 | 1999  | 22,168             | 21,348 | 23,398 | 14     | 196.36 | 189.10 | 207.25 | 8      |        |    |
|                               |                 | 2000  | 18,853             | 9,162  | 22,831 | 20     | 162.49 | 78.97  | 196.78 | 11     |        |    |
|                               |                 | 2001  | 21,922             | 21,184 | 22,429 | 16     | 184.37 | 178.16 | 188.63 | 9      |        |    |
|                               |                 | 2002  | 18,324             | 8,244  | 23,726 | 19     | 150.35 | 67.65  | 194.68 | 17     |        |    |
|                               |                 | 2003  | 17,921             | 7,706  | 24,958 | 19     | 144.14 | 61.98  | 200.73 | 17     |        |    |
|                               |                 | 2004  | 17,366             | 7,134  | 26,177 | 19     | 137.05 | 56.30  | 206.58 | 21     |        |    |
|                               |                 | 2005  | 16,810             | 6,505  | 27,488 | 20     | 129.91 | 50.27  | 212.42 | 24     |        |    |
|                               |                 | 2006  | 16,359             | 5,884  | 29,274 | 21     | 122.96 | 44.23  | 220.04 | 27     |        |    |
|                               |                 | 2007  | 15,840             | 5,161  | 31,112 | 23     | 115.91 | 37.77  | 227.65 | 28     |        |    |
|                               |                 |       | Non-Hispanic White | 1992   | 14,576 | 13,597 | 16,411 | 9      | 203.56 | 189.89 | 229.19 | 9  |
|                               |                 |       |                    | 1993   | 11,848 | 5,147  | 15,593 | 15     | 165.46 | 71.88  | 217.76 | 12 |
|                               |                 |       |                    | 1994   | 13,835 | 12,960 | 15,043 | 9      | 191.37 | 179.26 | 208.07 | 11 |
|                               |                 |       |                    | 1995   | 11,567 | 5,231  | 14,577 | 14     | 158.50 | 71.67  | 199.73 | 11 |
| 1996                          | 11,507          |       |                    | 5,307  | 14,157 | 14     | 156.45 | 72.15  | 192.47 | 11     |        |    |
| 1997                          | 11,538          |       |                    | 5,426  | 14,057 | 14     | 154.81 | 72.80  | 188.60 | 8      |        |    |
| 1998                          | 11,552          |       |                    | 5,559  | 14,163 | 14     | 152.80 | 73.53  | 187.33 | 6      |        |    |
| 1999                          | 13,524          |       |                    | 13,024 | 14,275 | 9      | 176.42 | 169.90 | 186.21 | 6      |        |    |
| 2000                          | 11,595          |       |                    | 5,635  | 14,041 | 14     | 149.41 | 72.61  | 180.94 | 8      |        |    |
| 2001                          | 13,562          |       |                    | 13,106 | 13,876 | 11     | 173.16 | 167.33 | 177.16 | 6      |        |    |
| 2002                          | 11,365          |       |                    | 5,113  | 14,716 | 17     | 143.56 | 64.59  | 185.88 | 12     |        |    |
| 2003                          | 11,094          |       |                    | 4,770  | 15,449 | 17     | 139.07 | 59.80  | 193.67 | 13     |        |    |
| 2004                          | 10,666          |       |                    | 4,382  | 16,078 | 19     | 132.66 | 54.50  | 199.96 | 13     |        |    |
| 2005                          | 10,170          |       |                    | 3,935  | 16,631 | 20     | 125.28 | 48.48  | 204.86 | 16     |        |    |
| 2006                          | 9,663           | 3,476 | 17,293             | 21     | 117.61 | 42.31  | 210.47 | 21     |        |        |        |    |
| 2007                          | 9,039           | 2,945 | 17,753             | 22     | 108.63 | 35.39  | 213.35 | 26     |        |        |        |    |

| Metropolitan Statistical Area | PWID Population    | Year | Number   | Min   | Max   | Rank  | Rate   | Min    | Max    | Rank   |        |    |
|-------------------------------|--------------------|------|----------|-------|-------|-------|--------|--------|--------|--------|--------|----|
| Fort Worth--Arlington, TX     | Non-Hispanic Black | 1992 | 6,046    | 5,640 | 6,807 | 17    | 620.17 | 578.52 | 698.25 | 8      |        |    |
|                               |                    | 1993 | 5,025    | 2,183 | 6,614 | 20    | 503.55 | 218.77 | 662.72 | 12     |        |    |
|                               |                    | 1994 | 5,858    | 5,488 | 6,370 | 17    | 565.96 | 530.14 | 615.34 | 7      |        |    |
|                               |                    | 1995 | 4,794    | 2,168 | 6,042 | 19    | 446.47 | 201.88 | 562.63 | 13     |        |    |
|                               |                    | 1996 | 4,597    | 2,120 | 5,655 | 20    | 414.68 | 191.25 | 510.17 | 13     |        |    |
|                               |                    | 1997 | 4,393    | 2,066 | 5,352 | 21    | 381.95 | 179.62 | 465.34 | 13     |        |    |
|                               |                    | 1998 | 4,165    | 2,004 | 5,106 | 21    | 349.79 | 168.32 | 428.84 | 13     |        |    |
|                               |                    | 1999 | 4,608    | 4,438 | 4,864 | 19    | 373.06 | 359.27 | 393.76 | 9      |        |    |
|                               |                    | 2000 | 3,744    | 1,820 | 4,534 | 21    | 293.06 | 142.43 | 354.89 | 14     |        |    |
|                               |                    | 2001 | 4,182    | 4,041 | 4,279 | 21    | 314.14 | 303.58 | 321.41 | 14     |        |    |
|                               |                    | 2002 | 3,389    | 1,525 | 4,388 | 22    | 245.27 | 110.35 | 317.58 | 22     |        |    |
|                               |                    | 2003 | 3,256    | 1,400 | 4,534 | 22    | 228.48 | 98.25  | 318.19 | 22     |        |    |
|                               |                    | 2004 | 3,152    | 1,295 | 4,750 | 24    | 214.90 | 88.29  | 323.93 | 25     |        |    |
|                               |                    | 2005 | 3,111    | 1,204 | 5,087 | 23    | 205.76 | 79.62  | 336.46 | 29     |        |    |
|                               |                    | 2006 | 3,163    | 1,138 | 5,661 | 23    | 197.74 | 71.13  | 353.86 | 34     |        |    |
|                               |                    | 2007 | 3,289    | 1,072 | 6,460 | 24    | 198.23 | 64.59  | 389.33 | 36     |        |    |
|                               |                    |      | Hispanic | 1992  | 1,936 | 1,806 | 2,179  | 35     | 168.40 | 157.09 | 189.60 | 38 |
|                               |                    |      |          | 1993  | 1,621 | 704   | 2,134  | 35     | 132.16 | 57.42  | 173.94 | 41 |
|                               |                    |      |          | 1994  | 1,932 | 1,810 | 2,101  | 34     | 146.59 | 137.31 | 159.38 | 38 |
|                               |                    |      |          | 1995  | 1,636 | 740   | 2,062  | 35     | 115.36 | 52.16  | 145.37 | 45 |
| 1996                          | 1,639              |      |          | 756   | 2,016 | 35    | 107.27 | 49.48  | 131.98 | 46     |        |    |
| 1997                          | 1,649              |      |          | 775   | 2,009 | 35    | 99.92  | 46.99  | 121.74 | 46     |        |    |
| 1998                          | 1,655              |      |          | 796   | 2,029 | 35    | 93.03  | 44.76  | 114.05 | 45     |        |    |
| 1999                          | 1,943              |      |          | 1,872 | 2,051 | 35    | 101.40 | 97.66  | 107.03 | 41     |        |    |
| 2000                          | 1,677              |      |          | 815   | 2,031 | 37    | 81.25  | 39.49  | 98.39  | 49     |        |    |
| 2001                          | 1,985              |      |          | 1,918 | 2,030 | 37    | 89.98  | 86.95  | 92.06  | 46     |        |    |
| 2002                          | 1,696              |      |          | 763   | 2,196 | 37    | 72.38  | 32.57  | 93.72  | 54     |        |    |
| 2003                          | 1,705              |      |          | 733   | 2,374 | 37    | 69.20  | 29.76  | 96.37  | 57     |        |    |
| 2004                          | 1,710              |      |          | 703   | 2,578 | 36    | 66.30  | 27.24  | 99.93  | 58     |        |    |
| 2005                          | 1,728              |      |          | 668   | 2,825 | 36    | 63.84  | 24.70  | 104.39 | 58     |        |    |
| 2006                          | 1,772              | 637  | 3,171    | 36    | 61.94 | 22.28 | 110.84 | 59     |        |        |        |    |
| 2007                          | 1,830              | 596  | 3,594    | 35    | 60.28 | 19.64 | 118.40 | 59     |        |        |        |    |

| Metropolitan Statistical Area | PWID Population | Year   | Number | Min    | Max    | Rank   | Rate   | Min    | Max    | Rank   |    |
|-------------------------------|-----------------|--------|--------|--------|--------|--------|--------|--------|--------|--------|----|
| Fort Worth--Arlington, TX     | Male            | 1992   | 15,027 | 14,018 | 16,919 | 17     | 312.41 | 291.43 | 351.74 | 9      |    |
|                               |                 | 1993   | 12,345 | 5,363  | 16,247 | 23     | 253.65 | 110.20 | 333.83 | 13     |    |
|                               |                 | 1994   | 14,489 | 13,572 | 15,753 | 15     | 290.92 | 272.51 | 316.30 | 8      |    |
|                               |                 | 1995   | 12,117 | 5,479  | 15,269 | 23     | 238.02 | 107.63 | 299.94 | 14     |    |
|                               |                 | 1996   | 12,009 | 5,538  | 14,774 | 21     | 230.71 | 106.41 | 283.84 | 14     |    |
|                               |                 | 1997   | 11,959 | 5,624  | 14,570 | 20     | 223.46 | 105.08 | 272.25 | 13     |    |
|                               |                 | 1998   | 11,866 | 5,710  | 14,547 | 20     | 215.57 | 103.73 | 264.30 | 13     |    |
|                               |                 | 1999   | 13,744 | 13,236 | 14,506 | 13     | 242.62 | 233.65 | 256.08 | 12     |    |
|                               |                 | 2000   | 11,648 | 5,661  | 14,105 | 20     | 199.93 | 97.17  | 242.12 | 18     |    |
|                               |                 | 2001   | 13,463 | 13,010 | 13,775 | 16     | 225.17 | 217.59 | 230.38 | 14     |    |
|                               |                 | 2002   | 11,151 | 5,017  | 14,438 | 20     | 181.77 | 81.78  | 235.36 | 23     |    |
|                               |                 | 2003   | 10,761 | 4,628  | 14,987 | 19     | 172.03 | 73.98  | 239.58 | 23     |    |
|                               |                 | 2004   | 10,238 | 4,206  | 15,432 | 22     | 160.46 | 65.92  | 241.86 | 26     |    |
|                               |                 | 2005   | 9,669  | 3,741  | 15,810 | 25     | 148.25 | 57.37  | 242.42 | 34     |    |
|                               | 2006            | 9,110  | 3,277  | 16,302 | 26     | 135.86 | 48.87  | 243.12 | 36     |        |    |
|                               | 2007            | 8,461  | 2,757  | 16,618 | 32     | 122.74 | 39.99  | 241.06 | 41     |        |    |
|                               |                 | Female | 1992   | 9,032  | 8,425  | 10,169 | 14     | 189.26 | 176.55 | 213.09 | 2  |
|                               |                 |        | 1993   | 7,566  | 3,287  | 9,957  | 19     | 156.41 | 67.95  | 205.85 | 9  |
|                               |                 |        | 1994   | 8,983  | 8,414  | 9,767  | 14     | 181.70 | 170.20 | 197.56 | 4  |
|                               |                 |        | 1995   | 7,555  | 3,416  | 9,520  | 19     | 149.16 | 67.45  | 187.97 | 9  |
|                               |                 |        | 1996   | 7,501  | 3,460  | 9,229  | 18     | 144.88 | 66.82  | 178.23 | 11 |
|                               | 1997            |        | 7,471  | 3,513  | 9,102  | 18     | 140.43 | 66.04  | 171.09 | 12     |    |
|                               | 1998            |        | 7,415  | 3,568  | 9,091  | 18     | 135.59 | 65.24  | 166.23 | 11     |    |
|                               | 1999            |        | 8,611  | 8,293  | 9,089  | 13     | 153.09 | 147.43 | 161.58 | 6      |    |
|                               | 2000            |        | 7,348  | 3,571  | 8,899  | 19     | 127.21 | 61.82  | 154.05 | 12     |    |
|                               | 2001            |        | 8,607  | 8,318  | 8,806  | 16     | 145.61 | 140.71 | 148.97 | 7      |    |
|                               | 2002            |        | 7,285  | 3,277  | 9,432  | 18     | 120.35 | 54.15  | 155.84 | 12     |    |
|                               | 2003            |        | 7,260  | 3,122  | 10,111 | 18     | 117.52 | 50.54  | 163.66 | 13     |    |
|                               | 2004            |        | 7,223  | 2,967  | 10,887 | 19     | 114.80 | 47.16  | 173.05 | 16     |    |
|                               | 2005            |        | 7,237  | 2,800  | 11,834 | 18     | 112.75 | 43.63  | 184.37 | 16     |    |
|                               | 2006            | 7,356  | 2,646  | 13,163 | 19     | 111.47 | 40.10  | 199.48 | 16     |        |    |
|                               | 2007            | 7,507  | 2,446  | 14,744 | 18     | 110.85 | 36.12  | 217.71 | 17     |        |    |

| Metropolitan Statistical Area | PWID Population | Year  | Number      | Min    | Max    | Rank   | Rate   | Min    | Max    | Rank   |        |    |
|-------------------------------|-----------------|-------|-------------|--------|--------|--------|--------|--------|--------|--------|--------|----|
| Fort Worth--Arlington, TX     | Young (15-29)   | 1992  | 8,319       | 7,760  | 9,366  | 7      | 249.24 | 232.49 | 280.61 | 4      |        |    |
|                               |                 | 1993  | 6,245       | 2,713  | 8,219  | 16     | 189.46 | 82.31  | 249.35 | 7      |        |    |
|                               |                 | 1994  | 6,908       | 6,470  | 7,510  | 9      | 208.89 | 195.67 | 227.12 | 6      |        |    |
|                               |                 | 1995  | 5,605       | 2,535  | 7,063  | 17     | 167.78 | 75.87  | 211.43 | 8      |        |    |
|                               |                 | 1996  | 5,531       | 2,551  | 6,805  | 17     | 162.83 | 75.10  | 200.32 | 9      |        |    |
|                               |                 | 1997  | 5,603       | 2,635  | 6,826  | 16     | 160.82 | 75.63  | 195.93 | 11     |        |    |
|                               |                 | 1998  | 5,747       | 2,765  | 7,046  | 14     | 160.64 | 77.30  | 196.94 | 12     |        |    |
|                               |                 | 1999  | 6,960       | 6,703  | 7,346  | 9      | 189.64 | 182.63 | 200.16 | 8      |        |    |
|                               |                 | 2000  | 6,206       | 3,016  | 7,515  | 14     | 165.28 | 80.33  | 200.16 | 15     |        |    |
|                               |                 | 2001  | 7,559       | 7,305  | 7,734  | 11     | 197.52 | 190.88 | 202.09 | 11     |        |    |
|                               |                 | 2002  | 6,580       | 2,961  | 8,520  | 13     | 168.17 | 75.66  | 217.76 | 17     |        |    |
|                               |                 | 2003  | 6,634       | 2,853  | 9,238  | 15     | 166.61 | 71.64  | 232.02 | 17     |        |    |
|                               |                 | 2004  | 6,529       | 2,682  | 9,842  | 16     | 161.23 | 66.24  | 243.03 | 18     |        |    |
|                               |                 | 2005  | 6,299       | 2,437  | 10,300 | 17     | 152.58 | 59.04  | 249.49 | 23     |        |    |
|                               |                 | 2006  | 5,966       | 2,146  | 10,676 | 18     | 140.61 | 50.58  | 251.62 | 27     |        |    |
|                               |                 | 2007  | 5,458       | 1,778  | 10,720 | 21     | 125.25 | 40.81  | 246.01 | 31     |        |    |
|                               |                 |       | Old (30-64) | 1992   | 15,510 | 14,468 | 17,462 | 21     | 248.37 | 231.69 | 279.64 | 13 |
|                               |                 |       |             | 1993   | 13,505 | 5,867  | 17,774 | 23     | 210.76 | 91.57  | 277.39 | 18 |
|                               |                 |       |             | 1994   | 16,399 | 15,361 | 17,830 | 16     | 247.82 | 232.13 | 269.44 | 8  |
|                               |                 |       |             | 1995   | 13,945 | 6,305  | 17,572 | 21     | 204.62 | 92.52  | 257.85 | 13 |
|                               |                 |       |             | 1996   | 13,874 | 6,399  | 17,068 | 21     | 198.59 | 91.59  | 244.32 | 12 |
| 1997                          | 13,736          |       |             | 6,459  | 16,735 | 21     | 191.09 | 89.86  | 232.81 | 14     |        |    |
| 1998                          | 13,452          |       |             | 6,473  | 16,492 | 21     | 181.90 | 87.53  | 223.01 | 14     |        |    |
| 1999                          | 15,305          |       |             | 14,739 | 16,154 | 16     | 200.87 | 193.44 | 212.01 | 8      |        |    |
| 2000                          | 12,713          |       |             | 6,179  | 15,396 | 22     | 162.01 | 78.73  | 196.19 | 16     |        |    |
| 2001                          | 14,417          |       |             | 13,932 | 14,751 | 19     | 178.80 | 172.78 | 182.93 | 9      |        |    |
| 2002                          | 11,771          |       |             | 5,296  | 15,241 | 22     | 142.25 | 64.00  | 184.20 | 20     |        |    |
| 2003                          | 11,301          |       |             | 4,860  | 15,738 | 22     | 133.71 | 57.50  | 186.21 | 25     |        |    |
| 2004                          | 10,844          |       |             | 4,455  | 16,346 | 23     | 125.78 | 51.67  | 189.59 | 25     |        |    |
| 2005                          | 10,523          |       |             | 4,072  | 17,207 | 25     | 119.42 | 46.21  | 195.27 | 26     |        |    |
| 2006                          | 10,419          |       |             | 3,748  | 18,645 | 25     | 114.99 | 41.36  | 205.77 | 26     |        |    |
| 2007                          | 10,430          | 3,398 | 20,485      | 24     | 112.05 | 36.51  | 220.07 | 25     |        |        |        |    |

| Metropolitan Statistical Area | PWID Population | Year  | Number             | Min    | Max    | Rank  | Rate   | Min    | Max    | Rank   |        |   |
|-------------------------------|-----------------|-------|--------------------|--------|--------|-------|--------|--------|--------|--------|--------|---|
| Fresno, CA                    | Total           | 1992  | 11,992             | 6,542  | 17,155 | 38    | 239.68 | 130.74 | 342.85 | 8      |        |   |
|                               |                 | 1993  | 16,640             | 6,878  | 29,058 | 26    | 325.24 | 134.44 | 567.96 | 1      |        |   |
|                               |                 | 1994  | 12,968             | 7,263  | 17,674 | 35    | 249.26 | 139.59 | 339.70 | 3      |        |   |
|                               |                 | 1995  | 16,354             | 7,700  | 25,226 | 26    | 310.38 | 146.15 | 478.77 | 1      |        |   |
|                               |                 | 1996  | 16,301             | 8,356  | 23,461 | 26    | 302.93 | 155.28 | 435.99 | 1      |        |   |
|                               |                 | 1997  | 16,370             | 9,665  | 21,739 | 25    | 297.03 | 175.38 | 394.45 | 1      |        |   |
|                               |                 | 1998  | 16,208             | 10,447 | 19,845 | 25    | 288.23 | 185.78 | 352.91 | 1      |        |   |
|                               |                 | 1999  | 15,123             | 10,424 | 19,215 | 30    | 262.85 | 181.17 | 333.97 | 4      |        |   |
|                               |                 | 2000  | 15,153             | 9,551  | 20,505 | 26    | 257.82 | 162.51 | 348.87 | 4      |        |   |
|                               |                 | 2001  | 14,610             | 7,939  | 21,834 | 30    | 243.85 | 132.51 | 364.44 | 4      |        |   |
|                               |                 | 2002  | 14,071             | 6,222  | 23,392 | 28    | 229.00 | 101.26 | 380.70 | 5      |        |   |
|                               |                 | 2003  | 13,991             | 5,021  | 25,095 | 29    | 221.72 | 79.57  | 397.69 | 6      |        |   |
|                               |                 | 2004  | 14,404             | 4,452  | 26,841 | 28    | 222.94 | 68.91  | 415.44 | 6      |        |   |
|                               |                 | 2005  | 14,835             | 3,847  | 28,584 | 26    | 225.22 | 58.40  | 433.97 | 6      |        |   |
|                               |                 | 2006  | 15,338             | 3,220  | 30,411 | 24    | 228.57 | 47.99  | 453.19 | 6      |        |   |
|                               |                 | 2007  | 15,893             | 2,556  | 32,250 | 22    | 232.84 | 37.45  | 472.49 | 5      |        |   |
|                               |                 |       | Non-Hispanic White | 1992   | 5,768  | 3,147 | 8,251  | 42     | 225.41 | 122.96 | 322.44 | 4 |
|                               |                 |       |                    | 1993   | 7,132  | 2,948 | 12,454 | 27     | 279.84 | 115.68 | 488.69 | 2 |
|                               |                 |       |                    | 1994   | 5,129  | 2,873 | 6,991  | 44     | 202.99 | 113.68 | 276.64 | 6 |
|                               |                 |       |                    | 1995   | 6,181  | 2,911 | 9,535  | 33     | 247.31 | 116.45 | 381.47 | 2 |
| 1996                          | 6,072           |       |                    | 3,112  | 8,738  | 32    | 244.11 | 125.13 | 351.33 | 2      |        |   |
| 1997                          | 6,156           |       |                    | 3,635  | 8,175  | 32    | 246.44 | 145.51 | 327.27 | 1      |        |   |
| 1998                          | 6,258           |       |                    | 4,034  | 7,663  | 32    | 250.02 | 161.15 | 306.12 | 2      |        |   |
| 1999                          | 6,051           |       |                    | 4,171  | 7,689  | 35    | 240.51 | 165.77 | 305.58 | 3      |        |   |
| 2000                          | 6,297           |       |                    | 3,969  | 8,520  | 31    | 249.76 | 157.43 | 337.96 | 3      |        |   |
| 2001                          | 6,277           |       |                    | 3,411  | 9,381  | 34    | 247.05 | 134.24 | 369.21 | 3      |        |   |
| 2002                          | 6,189           |       |                    | 2,737  | 10,289 | 33    | 241.09 | 106.60 | 400.80 | 3      |        |   |
| 2003                          | 6,205           |       |                    | 2,227  | 11,129 | 34    | 238.76 | 85.69  | 428.25 | 3      |        |   |
| 2004                          | 6,311           |       |                    | 1,951  | 11,760 | 32    | 240.97 | 74.48  | 449.04 | 3      |        |   |
| 2005                          | 6,253           |       |                    | 1,621  | 12,048 | 33    | 238.39 | 61.82  | 459.35 | 3      |        |   |
| 2006                          | 6,010           | 1,262 | 11,915             | 36     | 229.12 | 48.10 | 454.28 | 4      |        |        |        |   |
| 2007                          | 5,535           | 890   | 11,232             | 40     | 211.25 | 33.98 | 428.67 | 6      |        |        |        |   |

| Metropolitan Statistical Area | PWID Population    | Year  | Number   | Min   | Max    | Rank  | Rate   | Min    | Max     | Rank   |        |    |
|-------------------------------|--------------------|-------|----------|-------|--------|-------|--------|--------|---------|--------|--------|----|
| Fresno, CA                    | Non-Hispanic Black | 1992  | 997      | 544   | 1,426  | 80    | 450.11 | 245.53 | 643.88  | 24     |        |    |
|                               |                    | 1993  | 1,444    | 597   | 2,522  | 62    | 627.39 | 259.34 | 1095.62 | 8      |        |    |
|                               |                    | 1994  | 1,145    | 641   | 1,561  | 68    | 481.83 | 269.84 | 656.67  | 14     |        |    |
|                               |                    | 1995  | 1,440    | 678   | 2,221  | 61    | 583.31 | 274.66 | 899.76  | 7      |        |    |
|                               |                    | 1996  | 1,409    | 722   | 2,028  | 60    | 538.46 | 276.01 | 774.96  | 8      |        |    |
|                               |                    | 1997  | 1,375    | 812   | 1,826  | 61    | 503.46 | 297.26 | 668.57  | 7      |        |    |
|                               |                    | 1998  | 1,317    | 849   | 1,613  | 62    | 466.23 | 300.51 | 570.85  | 8      |        |    |
|                               |                    | 1999  | 1,190    | 820   | 1,512  | 63    | 405.83 | 279.71 | 515.62  | 8      |        |    |
|                               |                    | 2000  | 1,162    | 732   | 1,572  | 62    | 382.02 | 240.79 | 516.94  | 9      |        |    |
|                               |                    | 2001  | 1,103    | 600   | 1,649  | 63    | 354.05 | 192.39 | 529.12  | 9      |        |    |
|                               |                    | 2002  | 1,065    | 471   | 1,770  | 62    | 333.60 | 147.51 | 554.61  | 11     |        |    |
|                               |                    | 2003  | 1,085    | 389   | 1,945  | 62    | 329.53 | 118.26 | 591.06  | 11     |        |    |
|                               |                    | 2004  | 1,176    | 363   | 2,191  | 61    | 343.27 | 106.10 | 639.67  | 11     |        |    |
|                               |                    | 2005  | 1,318    | 342   | 2,540  | 58    | 373.70 | 96.91  | 720.09  | 9      |        |    |
|                               |                    | 2006  | 1,541    | 323   | 3,055  | 49    | 429.50 | 90.17  | 851.58  | 8      |        |    |
|                               |                    | 2007  | 1,882    | 303   | 3,819  | 38    | 516.08 | 83.01  | 1047.24 | 6      |        |    |
|                               |                    |       | Hispanic | 1992  | 5,036  | 2,747 | 7,204  | 15     | 272.67  | 148.74 | 390.05 | 21 |
|                               |                    |       |          | 1993  | 7,041  | 2,910 | 12,296 | 9      | 362.31  | 149.76 | 632.70 | 9  |
|                               |                    |       |          | 1994  | 5,540  | 3,103 | 7,551  | 12     | 273.02  | 152.90 | 372.09 | 17 |
|                               |                    |       |          | 1995  | 7,062  | 3,325 | 10,894 | 9      | 336.09  | 158.25 | 518.43 | 11 |
| 1996                          | 7,119              |       |          | 3,649 | 10,245 | 8     | 323.65 | 165.90 | 465.81  | 12     |        |    |
| 1997                          | 7,228              |       |          | 4,268 | 9,598  | 9     | 315.11 | 186.06 | 418.46  | 12     |        |    |
| 1998                          | 7,229              |       |          | 4,659 | 8,851  | 9     | 303.74 | 195.77 | 371.89  | 12     |        |    |
| 1999                          | 6,804              |       |          | 4,689 | 8,644  | 11    | 275.20 | 189.68 | 349.65  | 13     |        |    |
| 2000                          | 6,862              |       |          | 4,325 | 9,286  | 9     | 267.44 | 168.57 | 361.88  | 13     |        |    |
| 2001                          | 6,643              |       |          | 3,610 | 9,928  | 9     | 251.38 | 136.59 | 375.68  | 14     |        |    |
| 2002                          | 6,403              |       |          | 2,831 | 10,645 | 8     | 233.64 | 103.31 | 388.42  | 15     |        |    |
| 2003                          | 6,349              |       |          | 2,278 | 11,387 | 9     | 223.52 | 80.22  | 400.91  | 16     |        |    |
| 2004                          | 6,489              |       |          | 2,006 | 12,092 | 9     | 220.96 | 68.29  | 411.74  | 16     |        |    |
| 2005                          | 6,602              |       |          | 1,712 | 12,721 | 9     | 217.70 | 56.46  | 419.49  | 17     |        |    |
| 2006                          | 6,704              |       |          | 1,407 | 13,292 | 8     | 214.06 | 44.94  | 424.43  | 16     |        |    |
| 2007                          | 6,778              | 1,090 | 13,754   | 8     | 209.93 | 33.77 | 425.99 | 17     |         |        |        |    |

| Metropolitan Statistical Area | PWID Population | Year   | Number | Min    | Max    | Rank   | Rate   | Min    | Max    | Rank   |   |
|-------------------------------|-----------------|--------|--------|--------|--------|--------|--------|--------|--------|--------|---|
| Fresno, CA                    | Male            | 1992   | 7,351  | 4,010  | 10,515 | 40     | 291.66 | 159.10 | 417.22 | 15     |   |
|                               |                 | 1993   | 10,405 | 4,301  | 18,170 | 27     | 403.40 | 166.75 | 704.46 | 2      |   |
|                               |                 | 1994   | 8,236  | 4,613  | 11,225 | 37     | 314.38 | 176.06 | 428.45 | 5      |   |
|                               |                 | 1995   | 10,511 | 4,949  | 16,213 | 26     | 395.84 | 186.39 | 610.59 | 1      |   |
|                               |                 | 1996   | 10,570 | 5,418  | 15,213 | 26     | 388.15 | 198.96 | 558.63 | 1      |   |
|                               |                 | 1997   | 10,683 | 6,307  | 14,186 | 25     | 382.98 | 226.13 | 508.59 | 1      |   |
|                               |                 | 1998   | 10,624 | 6,848  | 13,008 | 25     | 373.76 | 240.90 | 457.62 | 1      |   |
|                               |                 | 1999   | 9,942  | 6,852  | 12,632 | 28     | 342.35 | 235.96 | 434.97 | 2      |   |
|                               |                 | 2000   | 9,980  | 6,291  | 13,505 | 24     | 336.76 | 212.27 | 455.69 | 3      |   |
|                               |                 | 2001   | 9,634  | 5,235  | 14,399 | 28     | 318.58 | 173.11 | 476.12 | 5      |   |
|                               |                 | 2002   | 9,289  | 4,107  | 15,443 | 25     | 298.81 | 132.13 | 496.76 | 5      |   |
|                               |                 | 2003   | 9,248  | 3,319  | 16,588 | 25     | 289.86 | 104.03 | 519.91 | 6      |   |
|                               |                 | 2004   | 9,540  | 2,949  | 17,777 | 25     | 292.13 | 90.29  | 544.36 | 6      |   |
|                               |                 | 2005   | 9,855  | 2,555  | 18,989 | 23     | 295.69 | 76.68  | 569.77 | 6      |   |
|                               |                 | 2006   | 10,234 | 2,149  | 20,292 | 23     | 301.50 | 63.30  | 597.78 | 5      |   |
|                               | 2007            | 10,671 | 1,716  | 21,654 | 21     | 308.70 | 49.65  | 626.42 | 5      |        |   |
|                               |                 | Female | 1992   | 4,595  | 2,507  | 6,573  | 35     | 185.03 | 100.93 | 264.68 | 3 |
|                               |                 |        | 1993   | 6,217  | 2,570  | 10,857 | 23     | 245.07 | 101.30 | 427.96 | 2 |
|                               |                 |        | 1994   | 4,750  | 2,660  | 6,474  | 36     | 183.91 | 103.00 | 250.65 | 3 |
|                               |                 |        | 1995   | 5,901  | 2,779  | 9,102  | 24     | 225.78 | 106.31 | 348.27 | 2 |
|                               |                 |        | 1996   | 5,818  | 2,982  | 8,373  | 24     | 218.90 | 112.21 | 315.05 | 2 |
|                               |                 |        | 1997   | 5,798  | 3,424  | 7,700  | 24     | 213.04 | 125.78 | 282.90 | 3 |
|                               |                 |        | 1998   | 5,712  | 3,682  | 6,994  | 25     | 205.42 | 132.40 | 251.51 | 3 |
|                               |                 |        | 1999   | 5,312  | 3,661  | 6,749  | 28     | 186.43 | 128.50 | 236.87 | 4 |
|                               |                 |        | 2000   | 5,310  | 3,347  | 7,186  | 26     | 182.24 | 114.87 | 246.60 | 4 |
|                               | 2001            |        | 5,108  | 2,776  | 7,634  | 29     | 172.16 | 93.55  | 257.30 | 4      |   |
|                               | 2002            | 4,905  | 2,169  | 8,154  | 29     | 161.56 | 71.44  | 268.60 | 6      |        |   |
|                               | 2003            | 4,855  | 1,742  | 8,707  | 31     | 155.62 | 55.85  | 279.13 | 6      |        |   |
|                               | 2004            | 4,963  | 1,534  | 9,249  | 28     | 155.33 | 48.01  | 289.45 | 6      |        |   |
|                               | 2005            | 5,060  | 1,312  | 9,749  | 27     | 155.49 | 40.32  | 299.61 | 6      |        |   |
|                               | 2006            | 5,157  | 1,083  | 10,225 | 26     | 155.53 | 32.65  | 308.37 | 5      |        |   |
|                               | 2007            | 5,242  | 843    | 10,637 | 25     | 155.60 | 25.03  | 315.75 | 5      |        |   |

| Metropolitan Statistical Area | PWID Population | Year        | Number | Min    | Max    | Rank   | Rate   | Min    | Max    | Rank   |   |
|-------------------------------|-----------------|-------------|--------|--------|--------|--------|--------|--------|--------|--------|---|
| Fresno, CA                    | Young (15-29)   | 1992        | 2,605  | 1,421  | 3,726  | 44     | 140.43 | 76.60  | 200.88 | 21     |   |
|                               |                 | 1993        | 3,258  | 1,347  | 5,689  | 33     | 173.83 | 71.85  | 303.55 | 11     |   |
|                               |                 | 1994        | 2,306  | 1,291  | 3,142  | 44     | 122.45 | 68.57  | 166.88 | 26     |   |
|                               |                 | 1995        | 2,662  | 1,253  | 4,106  | 39     | 140.23 | 66.03  | 216.31 | 16     |   |
|                               |                 | 1996        | 2,450  | 1,256  | 3,526  | 43     | 126.28 | 64.73  | 181.74 | 23     |   |
|                               |                 | 1997        | 2,292  | 1,353  | 3,044  | 46     | 115.16 | 67.99  | 152.93 | 35     |   |
|                               |                 | 1998        | 2,133  | 1,375  | 2,612  | 55     | 104.61 | 67.43  | 128.08 | 37     |   |
|                               |                 | 1999        | 1,888  | 1,301  | 2,399  | 64     | 90.25  | 62.20  | 114.66 | 48     |   |
|                               |                 | 2000        | 1,811  | 1,142  | 2,451  | 64     | 84.45  | 53.23  | 114.27 | 54     |   |
|                               |                 | 2001        | 1,687  | 917    | 2,522  | 74     | 77.06  | 41.88  | 115.17 | 65     |   |
|                               |                 | 2002        | 1,585  | 701    | 2,635  | 76     | 70.11  | 31.00  | 116.56 | 68     |   |
|                               |                 | 2003        | 1,551  | 557    | 2,782  | 78     | 66.45  | 23.85  | 119.19 | 76     |   |
|                               |                 | 2004        | 1,586  | 490    | 2,956  | 78     | 65.80  | 20.34  | 122.62 | 77     |   |
|                               |                 | 2005        | 1,638  | 425    | 3,156  | 78     | 66.08  | 17.14  | 127.34 | 78     |   |
|                               |                 | 2006        | 1,713  | 360    | 3,396  | 79     | 67.39  | 14.15  | 133.62 | 80     |   |
|                               | 2007            | 1,812       | 291    | 3,676  | 77     | 69.83  | 11.23  | 141.69 | 77     |        |   |
|                               |                 | Old (30-64) | 1992   | 9,526  | 5,196  | 13,627 | 36     | 302.55 | 165.04 | 432.80 | 4 |
|                               |                 |             | 1993   | 13,500 | 5,580  | 23,575 | 24     | 416.40 | 172.12 | 727.17 | 1 |
|                               |                 |             | 1994   | 10,729 | 6,009  | 14,623 | 33     | 323.20 | 181.00 | 440.48 | 3 |
|                               |                 |             | 1995   | 13,773 | 6,485  | 21,246 | 23     | 408.64 | 192.41 | 630.33 | 1 |
|                               |                 |             | 1996   | 13,947 | 7,149  | 20,073 | 20     | 405.36 | 207.78 | 583.40 | 1 |
|                               | 1997            |             | 14,196 | 8,382  | 18,852 | 19     | 403.23 | 238.08 | 535.47 | 1      |   |
|                               | 1998            |             | 14,214 | 9,162  | 17,404 | 19     | 396.60 | 255.62 | 485.59 | 1      |   |
|                               | 1999            |             | 13,381 | 9,222  | 17,001 | 21     | 365.46 | 251.89 | 464.33 | 1      |   |
|                               | 2000            | 13,496      | 8,506  | 18,262 | 21     | 361.55 | 227.89 | 489.23 | 1      |        |   |
|                               | 2001            | 13,068      | 7,101  | 19,531 | 21     | 343.75 | 186.79 | 513.73 | 3      |        |   |
|                               | 2002            | 12,614      | 5,578  | 20,970 | 20     | 324.75 | 143.60 | 539.88 | 3      |        |   |
|                               | 2003            | 12,541      | 4,501  | 22,495 | 20     | 315.41 | 113.20 | 565.74 | 3      |        |   |
|                               | 2004            | 12,879      | 3,981  | 24,000 | 20     | 317.98 | 98.28  | 592.54 | 3      |        |   |
|                               | 2005            | 13,193      | 3,421  | 25,421 | 19     | 321.11 | 83.27  | 618.74 | 3      |        |   |
|                               | 2006            | 13,516      | 2,837  | 26,798 | 20     | 324.23 | 68.07  | 642.85 | 2      |        |   |
|                               | 2007            | 13,803      | 2,220  | 28,010 | 19     | 326.24 | 52.48  | 662.01 | 2      |        |   |



| Metropolitan Statistical Area | PWID Population | Year  | Number             | Min   | Max    | Rank  | Rate   | Min   | Max    | Rank  |        |    |
|-------------------------------|-----------------|-------|--------------------|-------|--------|-------|--------|-------|--------|-------|--------|----|
| Gary, IN                      | Total           | 1992  | 4,688              | 2,568 | 6,400  | 79    | 116.48 | 63.82 | 159.04 | 47    |        |    |
|                               |                 | 1993  | 4,166              | 2,363 | 6,486  | 82    | 102.83 | 58.32 | 160.09 | 50    |        |    |
|                               |                 | 1994  | 4,835              | 2,163 | 6,556  | 79    | 118.83 | 53.16 | 161.15 | 44    |        |    |
|                               |                 | 1995  | 4,634              | 1,965 | 6,640  | 81    | 113.21 | 47.99 | 162.21 | 43    |        |    |
|                               |                 | 1996  | 4,851              | 1,784 | 6,718  | 80    | 117.91 | 43.36 | 163.28 | 40    |        |    |
|                               |                 | 1997  | 5,035              | 1,597 | 6,840  | 77    | 122.08 | 38.74 | 165.85 | 38    |        |    |
|                               |                 | 1998  | 5,232              | 1,493 | 7,160  | 73    | 126.64 | 36.13 | 173.31 | 36    |        |    |
|                               |                 | 1999  | 5,249              | 1,386 | 7,474  | 79    | 126.94 | 33.52 | 180.76 | 35    |        |    |
|                               |                 | 2000  | 5,532              | 1,498 | 7,784  | 70    | 133.47 | 36.14 | 187.79 | 28    |        |    |
|                               |                 | 2001  | 5,575              | 1,611 | 8,099  | 76    | 134.10 | 38.75 | 194.82 | 29    |        |    |
|                               |                 | 2002  | 5,681              | 1,887 | 8,486  | 74    | 136.14 | 45.22 | 203.36 | 24    |        |    |
|                               |                 | 2003  | 5,790              | 2,167 | 8,882  | 72    | 138.14 | 51.70 | 211.90 | 21    |        |    |
|                               |                 | 2004  | 5,914              | 2,475 | 9,315  | 71    | 140.08 | 58.61 | 220.62 | 20    |        |    |
|                               |                 | 2005  | 6,060              | 2,793 | 9,774  | 70    | 142.20 | 65.53 | 229.35 | 19    |        |    |
|                               |                 | 2006  | 6,206              | 3,131 | 10,230 | 70    | 144.41 | 72.86 | 238.03 | 18    |        |    |
|                               |                 | 2007  | 6,362              | 3,474 | 10,689 | 69    | 146.85 | 80.18 | 246.71 | 18    |        |    |
|                               |                 |       | Non-Hispanic White | 1992  | 2,454  | 1,345 | 3,351  | 76    | 83.99  | 46.02 | 114.68 | 45 |
|                               |                 |       |                    | 1993  | 2,064  | 1,171 | 3,213  | 79    | 70.45  | 39.96 | 109.68 | 55 |
|                               |                 |       |                    | 1994  | 2,309  | 1,033 | 3,131  | 79    | 78.82  | 35.26 | 106.89 | 48 |
|                               |                 |       |                    | 1995  | 2,172  | 921   | 3,112  | 79    | 74.08  | 31.41 | 106.15 | 53 |
| 1996                          | 2,267           |       |                    | 834   | 3,139  | 77    | 77.31  | 28.43 | 107.06 | 52    |        |    |
| 1997                          | 2,378           |       |                    | 755   | 3,231  | 77    | 81.41  | 25.83 | 110.60 | 51    |        |    |
| 1998                          | 2,524           |       |                    | 720   | 3,454  | 77    | 86.82  | 24.77 | 118.81 | 42    |        |    |
| 1999                          | 2,607           |       |                    | 688   | 3,712  | 77    | 90.05  | 23.78 | 128.23 | 38    |        |    |
| 2000                          | 2,841           |       |                    | 769   | 3,998  | 74    | 98.49  | 26.66 | 138.57 | 31    |        |    |
| 2001                          | 2,967           |       |                    | 857   | 4,311  | 76    | 102.86 | 29.72 | 149.43 | 33    |        |    |
| 2002                          | 3,132           |       |                    | 1,040 | 4,678  | 69    | 108.57 | 36.07 | 162.17 | 27    |        |    |
| 2003                          | 3,298           |       |                    | 1,234 | 5,059  | 69    | 114.36 | 42.80 | 175.41 | 22    |        |    |
| 2004                          | 3,467           |       |                    | 1,451 | 5,460  | 66    | 120.04 | 50.23 | 189.07 | 17    |        |    |
| 2005                          | 3,634           |       |                    | 1,675 | 5,862  | 66    | 125.44 | 57.81 | 202.32 | 15    |        |    |
| 2006                          | 3,783           |       |                    | 1,909 | 6,236  | 62    | 130.31 | 65.74 | 214.78 | 13    |        |    |
| 2007                          | 3,910           | 2,135 | 6,570              | 61    | 134.47 | 73.42 | 225.91 | 13    |        |       |        |    |

| Metropolitan Statistical Area | PWID Population    | Year | Number   | Min  | Max    | Rank  | Rate   | Min    | Max    | Rank  |        |    |
|-------------------------------|--------------------|------|----------|------|--------|-------|--------|--------|--------|-------|--------|----|
| Gary, IN                      | Non-Hispanic Black | 1992 | 1,770    | 970  | 2,416  | 62    | 237.30 | 130.00 | 323.98 | 65    |        |    |
|                               |                    | 1993 | 1,668    | 946  | 2,598  | 54    | 221.22 | 125.47 | 344.41 | 58    |        |    |
|                               |                    | 1994 | 2,004    | 896  | 2,717  | 53    | 263.23 | 117.75 | 356.97 | 52    |        |    |
|                               |                    | 1995 | 1,947    | 826  | 2,790  | 49    | 253.54 | 107.49 | 363.30 | 48    |        |    |
|                               |                    | 1996 | 2,032    | 747  | 2,814  | 45    | 263.59 | 96.94  | 365.02 | 43    |        |    |
|                               |                    | 1997 | 2,073    | 658  | 2,816  | 41    | 267.10 | 84.75  | 362.87 | 34    |        |    |
|                               |                    | 1998 | 2,091    | 597  | 2,862  | 39    | 268.52 | 76.60  | 367.45 | 27    |        |    |
|                               |                    | 1999 | 2,017    | 532  | 2,872  | 42    | 258.53 | 68.27  | 368.15 | 23    |        |    |
|                               |                    | 2000 | 2,028    | 549  | 2,853  | 39    | 258.67 | 70.03  | 363.93 | 22    |        |    |
|                               |                    | 2001 | 1,939    | 560  | 2,818  | 42    | 246.88 | 71.34  | 358.65 | 22    |        |    |
|                               |                    | 2002 | 1,872    | 622  | 2,797  | 42    | 236.80 | 78.67  | 353.73 | 23    |        |    |
|                               |                    | 2003 | 1,811    | 678  | 2,777  | 41    | 227.30 | 85.06  | 348.65 | 23    |        |    |
|                               |                    | 2004 | 1,765    | 738  | 2,780  | 40    | 218.71 | 91.51  | 344.46 | 24    |        |    |
|                               |                    | 2005 | 1,743    | 803  | 2,811  | 38    | 213.22 | 98.26  | 343.89 | 27    |        |    |
|                               |                    | 2006 | 1,745    | 881  | 2,877  | 41    | 210.99 | 106.45 | 347.77 | 27    |        |    |
|                               |                    | 2007 | 1,783    | 974  | 2,995  | 45    | 212.94 | 116.27 | 357.76 | 31    |        |    |
|                               |                    |      | Hispanic | 1992 | 300    | 164   | 409    | 61     | 93.53  | 51.24 | 127.70 | 63 |
|                               |                    |      |          | 1993 | 267    | 152   | 416    | 60     | 81.00  | 45.94 | 126.11 | 62 |
|                               |                    |      |          | 1994 | 313    | 140   | 424    | 59     | 92.57  | 41.41 | 125.53 | 58 |
|                               |                    |      |          | 1995 | 304    | 129   | 436    | 59     | 86.46  | 36.65 | 123.89 | 56 |
| 1996                          | 324                |      |          | 119  | 449    | 59    | 88.53  | 32.56  | 122.60 | 51    |        |    |
| 1997                          | 344                |      |          | 109  | 467    | 59    | 90.39  | 28.68  | 122.80 | 49    |        |    |
| 1998                          | 366                |      |          | 104  | 500    | 58    | 92.32  | 26.33  | 126.33 | 48    |        |    |
| 1999                          | 376                |      |          | 99   | 535    | 59    | 92.15  | 24.33  | 131.22 | 45    |        |    |
| 2000                          | 407                |      |          | 110  | 572    | 59    | 96.57  | 26.15  | 135.87 | 44    |        |    |
| 2001                          | 421                |      |          | 122  | 611    | 59    | 97.86  | 28.28  | 142.16 | 41    |        |    |
| 2002                          | 440                |      |          | 146  | 657    | 60    | 100.21 | 33.29  | 149.69 | 43    |        |    |
| 2003                          | 460                |      |          | 172  | 705    | 58    | 102.04 | 38.19  | 156.52 | 40    |        |    |
| 2004                          | 481                |      |          | 201  | 758    | 58    | 103.54 | 43.33  | 163.08 | 38    |        |    |
| 2005                          | 505                |      |          | 233  | 815    | 58    | 104.73 | 48.26  | 168.92 | 37    |        |    |
| 2006                          | 530                | 268  | 874      | 59   | 105.94 | 53.45 | 174.62 | 35     |        |       |        |    |
| 2007                          | 557                | 304  | 936      | 59   | 107.46 | 58.67 | 180.53 | 33     |        |       |        |    |

| Metropolitan Statistical Area | PWID Population | Year   | Number | Min   | Max   | Rank   | Rate   | Min    | Max    | Rank   |    |
|-------------------------------|-----------------|--------|--------|-------|-------|--------|--------|--------|--------|--------|----|
| Gary, IN                      | Male            | 1992   | 3,504  | 1,920 | 4,784 | 76     | 179.12 | 98.13  | 244.56 | 37     |    |
|                               |                 | 1993   | 3,052  | 1,731 | 4,752 | 80     | 154.82 | 87.81  | 241.04 | 40     |    |
|                               |                 | 1994   | 3,489  | 1,561 | 4,732 | 76     | 176.10 | 78.78  | 238.81 | 35     |    |
|                               |                 | 1995   | 3,310  | 1,403 | 4,742 | 76     | 165.78 | 70.28  | 237.54 | 36     |    |
|                               |                 | 1996   | 3,443  | 1,266 | 4,769 | 74     | 171.51 | 63.08  | 237.51 | 36     |    |
|                               |                 | 1997   | 3,564  | 1,131 | 4,842 | 72     | 176.93 | 56.14  | 240.36 | 34     |    |
|                               |                 | 1998   | 3,705  | 1,057 | 5,070 | 67     | 183.49 | 52.34  | 251.09 | 28     |    |
|                               |                 | 1999   | 3,724  | 983   | 5,304 | 72     | 184.16 | 48.63  | 262.24 | 25     |    |
|                               |                 | 2000   | 3,938  | 1,066 | 5,540 | 64     | 194.18 | 52.57  | 273.19 | 20     |    |
|                               |                 | 2001   | 3,981  | 1,150 | 5,783 | 68     | 195.80 | 56.58  | 284.45 | 19     |    |
|                               |                 | 2002   | 4,066  | 1,351 | 6,074 | 63     | 199.25 | 66.19  | 297.63 | 17     |    |
|                               |                 | 2003   | 4,148  | 1,552 | 6,363 | 61     | 202.28 | 75.70  | 310.27 | 15     |    |
|                               |                 | 2004   | 4,230  | 1,770 | 6,662 | 59     | 204.89 | 85.74  | 322.71 | 15     |    |
|                               |                 | 2005   | 4,312  | 1,987 | 6,955 | 59     | 206.98 | 95.38  | 333.83 | 13     |    |
|                               |                 | 2006   | 4,376  | 2,208 | 7,212 | 57     | 208.38 | 105.13 | 343.47 | 12     |    |
|                               | 2007            | 4,419  | 2,413  | 7,424 | 57    | 208.85 | 114.04 | 350.88 | 12     |        |    |
|                               |                 | Female | 1992   | 1,346 | 738   | 1,838  | 82     | 65.10  | 35.66  | 88.88  | 58 |
|                               |                 |        | 1993   | 1,237 | 702   | 1,926  | 83     | 59.47  | 33.73  | 92.59  | 60 |
|                               |                 |        | 1994   | 1,483 | 664   | 2,011  | 83     | 71.07  | 31.79  | 96.37  | 53 |
|                               |                 |        | 1995   | 1,467 | 622   | 2,102  | 82     | 69.97  | 29.66  | 100.27 | 51 |
|                               |                 |        | 1996   | 1,583 | 582   | 2,192  | 80     | 75.13  | 27.63  | 104.04 | 47 |
|                               |                 |        | 1997   | 1,689 | 536   | 2,294  | 80     | 80.06  | 25.40  | 108.76 | 44 |
|                               |                 |        | 1998   | 1,799 | 513   | 2,462  | 77     | 85.19  | 24.30  | 116.58 | 37 |
|                               |                 |        | 1999   | 1,845 | 487   | 2,627  | 79     | 87.34  | 23.06  | 124.37 | 33 |
|                               |                 |        | 2000   | 1,980 | 536   | 2,786  | 73     | 93.55  | 25.33  | 131.62 | 26 |
|                               | 2001            |        | 2,024  | 585   | 2,941 | 74     | 95.30  | 27.54  | 138.44 | 28     |    |
|                               | 2002            | 2,083  | 692    | 3,111 | 72    | 97.69  | 32.45  | 145.93 | 22     |        |    |
|                               | 2003            | 2,133  | 798    | 3,272 | 67    | 99.65  | 37.29  | 152.85 | 21     |        |    |
|                               | 2004            | 2,178  | 911    | 3,430 | 67    | 100.93 | 42.23  | 158.96 | 21     |        |    |
|                               | 2005            | 2,217  | 1,022  | 3,576 | 67    | 101.78 | 46.91  | 164.17 | 21     |        |    |
|                               | 2006            | 2,241  | 1,131  | 3,694 | 69    | 101.97 | 51.45  | 168.08 | 19     |        |    |
|                               | 2007            | 2,252  | 1,230  | 3,784 | 69    | 101.59 | 55.47  | 170.68 | 19     |        |    |

| Metropolitan Statistical Area | PWID Population | Year        | Number | Min   | Max   | Rank   | Rate   | Min    | Max    | Rank   |    |
|-------------------------------|-----------------|-------------|--------|-------|-------|--------|--------|--------|--------|--------|----|
| Gary, IN                      | Young (15-29)   | 1992        | 1,204  | 659   | 1,643 | 79     | 92.09  | 50.45  | 125.73 | 48     |    |
|                               |                 | 1993        | 868    | 492   | 1,351 | 82     | 66.76  | 37.86  | 103.93 | 60     |    |
|                               |                 | 1994        | 889    | 398   | 1,205 | 83     | 68.79  | 30.77  | 93.29  | 60     |    |
|                               |                 | 1995        | 814    | 345   | 1,167 | 85     | 62.91  | 26.67  | 90.14  | 57     |    |
|                               |                 | 1996        | 874    | 321   | 1,210 | 84     | 67.26  | 24.74  | 93.14  | 58     |    |
|                               |                 | 1997        | 982    | 312   | 1,334 | 84     | 75.45  | 23.94  | 102.50 | 57     |    |
|                               |                 | 1998        | 1,150  | 328   | 1,573 | 83     | 88.39  | 25.21  | 120.96 | 48     |    |
|                               |                 | 1999        | 1,329  | 351   | 1,893 | 82     | 103.02 | 27.20  | 146.70 | 38     |    |
|                               |                 | 2000        | 1,627  | 441   | 2,290 | 73     | 127.22 | 34.44  | 178.98 | 27     |    |
|                               |                 | 2001        | 1,892  | 547   | 2,749 | 69     | 149.66 | 43.25  | 217.42 | 20     |    |
|                               |                 | 2002        | 2,185  | 726   | 3,264 | 59     | 173.64 | 57.68  | 259.37 | 15     |    |
|                               |                 | 2003        | 2,458  | 920   | 3,771 | 52     | 194.81 | 72.90  | 298.82 | 11     |    |
|                               |                 | 2004        | 2,685  | 1,123 | 4,228 | 52     | 210.56 | 88.11  | 331.64 | 9      |    |
|                               |                 | 2005        | 2,835  | 1,306 | 4,572 | 48     | 219.75 | 101.27 | 354.42 | 11     |    |
|                               |                 | 2006        | 2,867  | 1,446 | 4,725 | 50     | 220.03 | 111.01 | 362.67 | 8      |    |
|                               | 2007            | 2,751       | 1,502  | 4,622 | 55    | 209.90 | 114.61 | 352.64 | 11     |        |    |
|                               |                 | Old (30-64) | 1992   | 3,657 | 2,004 | 4,993  | 76     | 134.61 | 73.74  | 183.78 | 42 |
|                               |                 |             | 1993   | 3,406 | 1,932 | 5,303  | 79     | 123.80 | 70.22  | 192.74 | 44 |
|                               |                 |             | 1994   | 4,057 | 1,815 | 5,501  | 76     | 146.09 | 65.35  | 198.12 | 38 |
|                               |                 |             | 1995   | 3,936 | 1,668 | 5,639  | 73     | 140.61 | 59.61  | 201.48 | 35 |
|                               |                 |             | 1996   | 4,129 | 1,518 | 5,717  | 71     | 146.64 | 53.93  | 203.07 | 31 |
|                               | 1997            |             | 4,258  | 1,351 | 5,785 | 69     | 150.86 | 47.87  | 204.95 | 27     |    |
|                               | 1998            |             | 4,363  | 1,245 | 5,971 | 66     | 154.14 | 43.97  | 210.94 | 25     |    |
|                               | 1999            | 4,282       | 1,131  | 6,098 | 72    | 150.56 | 39.76  | 214.39 | 27     |        |    |
|                               | 2000            | 4,380       | 1,186  | 6,162 | 64    | 152.85 | 41.38  | 215.05 | 19     |        |    |
|                               | 2001            | 4,248       | 1,228  | 6,172 | 72    | 146.84 | 42.43  | 213.32 | 25     |        |    |
|                               | 2002            | 4,135       | 1,374  | 6,177 | 65    | 141.88 | 47.13  | 211.94 | 22     |        |    |
|                               | 2003            | 4,003       | 1,498  | 6,141 | 66    | 136.65 | 51.14  | 209.61 | 23     |        |    |
|                               | 2004            | 3,874       | 1,621  | 6,102 | 69    | 131.44 | 55.00  | 207.02 | 24     |        |    |
|                               | 2005            | 3,767       | 1,736  | 6,076 | 68    | 126.77 | 58.42  | 204.47 | 23     |        |    |
|                               | 2006            | 3,689       | 1,861  | 6,081 | 69    | 123.18 | 62.15  | 203.04 | 20     |        |    |
|                               | 2007            | 3,666       | 2,002  | 6,159 | 68    | 121.31 | 66.24  | 203.81 | 19     |        |    |

| Metropolitan Statistical Area       | PWID Population | Year  | Number             | Min   | Max   | Rank  | Rate  | Min   | Max   | Rank  |       |    |
|-------------------------------------|-----------------|-------|--------------------|-------|-------|-------|-------|-------|-------|-------|-------|----|
| Grand Rapids--Muskegon--Holland, MI | Total           | 1992  | 3,165              | 2,579 | 3,601 | 89    | 50.55 | 41.18 | 57.50 | 96    |       |    |
|                                     |                 | 1993  | 2,666              | 1,412 | 3,472 | 89    | 42.02 | 22.25 | 54.71 | 97    |       |    |
|                                     |                 | 1994  | 3,016              | 2,425 | 3,360 | 90    | 46.73 | 37.56 | 52.05 | 96    |       |    |
|                                     |                 | 1995  | 2,659              | 1,790 | 3,248 | 90    | 40.45 | 27.23 | 49.41 | 97    |       |    |
|                                     |                 | 1996  | 2,662              | 1,994 | 3,237 | 90    | 39.70 | 29.74 | 48.27 | 97    |       |    |
|                                     |                 | 1997  | 2,660              | 2,194 | 3,219 | 90    | 38.97 | 32.15 | 47.15 | 97    |       |    |
|                                     |                 | 1998  | 2,686              | 2,201 | 3,193 | 90    | 38.76 | 31.76 | 46.06 | 97    |       |    |
|                                     |                 | 1999  | 2,728              | 2,213 | 3,175 | 90    | 38.66 | 31.36 | 45.00 | 98    |       |    |
|                                     |                 | 2000  | 2,758              | 2,353 | 3,154 | 90    | 38.43 | 32.80 | 43.96 | 97    |       |    |
|                                     |                 | 2001  | 2,756              | 2,494 | 3,129 | 91    | 37.83 | 34.23 | 42.94 | 98    |       |    |
|                                     |                 | 2002  | 2,944              | 2,590 | 3,113 | 90    | 39.93 | 35.13 | 42.22 | 97    |       |    |
|                                     |                 | 2003  | 3,059              | 2,529 | 3,741 | 90    | 41.05 | 33.94 | 50.21 | 97    |       |    |
|                                     |                 | 2004  | 3,184              | 2,475 | 4,521 | 90    | 42.33 | 32.90 | 60.09 | 97    |       |    |
|                                     |                 | 2005  | 3,312              | 2,423 | 5,321 | 90    | 43.54 | 31.86 | 69.97 | 97    |       |    |
|                                     |                 | 2006  | 3,449              | 2,302 | 6,201 | 90    | 44.96 | 30.01 | 80.83 | 97    |       |    |
|                                     |                 | 2007  | 3,580              | 2,057 | 7,084 | 90    | 46.34 | 26.63 | 91.70 | 97    |       |    |
|                                     |                 |       | Non-Hispanic White | 1992  | 1,680 | 1,368 | 1,911 | 88    | 30.35 | 24.73 | 34.53 | 97 |
|                                     |                 |       |                    | 1993  | 1,442 | 764   | 1,877 | 93    | 25.83 | 13.68 | 33.63 | 99 |
|                                     |                 |       |                    | 1994  | 1,648 | 1,325 | 1,836 | 91    | 29.16 | 23.44 | 32.48 | 97 |
|                                     |                 |       |                    | 1995  | 1,458 | 982   | 1,781 | 91    | 25.47 | 17.15 | 31.11 | 98 |
| 1996                                | 1,459           |       |                    | 1,093 | 1,774 | 91    | 25.12 | 18.82 | 30.55 | 98    |       |    |
| 1997                                | 1,452           |       |                    | 1,198 | 1,757 | 91    | 24.70 | 20.38 | 29.89 | 99    |       |    |
| 1998                                | 1,458           |       |                    | 1,194 | 1,733 | 92    | 24.58 | 20.14 | 29.22 | 99    |       |    |
| 1999                                | 1,472           |       |                    | 1,194 | 1,713 | 91    | 24.55 | 19.92 | 28.58 | 99    |       |    |
| 2000                                | 1,482           |       |                    | 1,264 | 1,695 | 93    | 24.47 | 20.88 | 27.99 | 99    |       |    |
| 2001                                | 1,479           |       |                    | 1,338 | 1,679 | 94    | 24.14 | 21.84 | 27.41 | 100   |       |    |
| 2002                                | 1,585           |       |                    | 1,394 | 1,676 | 94    | 25.63 | 22.55 | 27.10 | 98    |       |    |
| 2003                                | 1,662           |       |                    | 1,374 | 2,033 | 94    | 26.67 | 22.05 | 32.62 | 97    |       |    |
| 2004                                | 1,758           |       |                    | 1,367 | 2,496 | 94    | 28.02 | 21.77 | 39.77 | 98    |       |    |
| 2005                                | 1,873           |       |                    | 1,370 | 3,009 | 92    | 29.58 | 21.64 | 47.54 | 98    |       |    |
| 2006                                | 2,014           |       |                    | 1,344 | 3,620 | 86    | 31.62 | 21.10 | 56.84 | 98    |       |    |
| 2007                                | 2,174           | 1,250 | 4,303              | 85    | 33.98 | 19.53 | 67.25 | 96    |       |       |       |    |

| Metropolitan Statistical Area       | PWID Population    | Year | Number   | Min  | Max   | Rank  | Rate   | Min    | Max    | Rank   |        |    |
|-------------------------------------|--------------------|------|----------|------|-------|-------|--------|--------|--------|--------|--------|----|
| Grand Rapids--Muskegon--Holland, MI | Non-Hispanic Black | 1992 | 1,048    | 854  | 1,193 | 77    | 251.38 | 204.80 | 285.97 | 60     |        |    |
|                                     |                    | 1993 | 910      | 482  | 1,185 | 80    | 212.74 | 112.66 | 277.01 | 60     |        |    |
|                                     |                    | 1994 | 1,045    | 840  | 1,164 | 71    | 237.64 | 191.03 | 264.68 | 59     |        |    |
|                                     |                    | 1995 | 923      | 621  | 1,127 | 72    | 204.13 | 137.44 | 249.33 | 57     |        |    |
|                                     |                    | 1996 | 915      | 685  | 1,112 | 69    | 197.58 | 148.01 | 240.22 | 54     |        |    |
|                                     |                    | 1997 | 896      | 739  | 1,084 | 68    | 188.81 | 155.77 | 228.47 | 55     |        |    |
|                                     |                    | 1998 | 878      | 719  | 1,044 | 68    | 180.70 | 148.06 | 214.78 | 57     |        |    |
|                                     |                    | 1999 | 859      | 697  | 1,000 | 67    | 172.05 | 139.58 | 200.28 | 64     |        |    |
|                                     |                    | 2000 | 831      | 709  | 950   | 68    | 162.20 | 138.43 | 185.55 | 56     |        |    |
|                                     |                    | 2001 | 791      | 715  | 897   | 71    | 152.25 | 137.76 | 172.83 | 64     |        |    |
|                                     |                    | 2002 | 801      | 705  | 847   | 69    | 152.79 | 134.43 | 161.57 | 56     |        |    |
|                                     |                    | 2003 | 789      | 652  | 965   | 69    | 148.71 | 122.96 | 181.90 | 55     |        |    |
|                                     |                    | 2004 | 779      | 605  | 1,106 | 71    | 144.90 | 112.63 | 205.72 | 55     |        |    |
|                                     |                    | 2005 | 771      | 564  | 1,239 | 71    | 141.75 | 103.70 | 227.76 | 54     |        |    |
|                                     |                    | 2006 | 770      | 514  | 1,384 | 74    | 139.50 | 93.12  | 250.80 | 56     |        |    |
|                                     |                    | 2007 | 774      | 445  | 1,531 | 76    | 138.64 | 79.67  | 274.36 | 55     |        |    |
|                                     |                    |      | Hispanic | 1992 | 303   | 247   | 345    | 59     | 141.52 | 115.30 | 160.99 | 48 |
|                                     |                    |      |          | 1993 | 221   | 117   | 288    | 63     | 95.31  | 50.48  | 124.10 | 55 |
|                                     |                    |      |          | 1994 | 222   | 179   | 248    | 66     | 87.89  | 70.65  | 97.89  | 61 |
|                                     |                    |      |          | 1995 | 179   | 120   | 218    | 68     | 64.28  | 43.28  | 78.52  | 68 |
| 1996                                | 166                |      |          | 125  | 202   | 69    | 53.98  | 40.44  | 65.62  | 73     |        |    |
| 1997                                | 158                |      |          | 130  | 191   | 69    | 46.74  | 38.57  | 56.56  | 74     |        |    |
| 1998                                | 154                |      |          | 126  | 183   | 72    | 41.55  | 34.05  | 49.39  | 76     |        |    |
| 1999                                | 153                |      |          | 124  | 178   | 73    | 37.70  | 30.59  | 43.88  | 80     |        |    |
| 2000                                | 153                |      |          | 131  | 175   | 73    | 34.76  | 29.66  | 39.76  | 78     |        |    |
| 2001                                | 153                |      |          | 138  | 173   | 74    | 32.61  | 29.50  | 37.01  | 82     |        |    |
| 2002                                | 164                |      |          | 144  | 173   | 73    | 33.54  | 29.51  | 35.46  | 78     |        |    |
| 2003                                | 172                |      |          | 142  | 210   | 73    | 33.88  | 28.01  | 41.44  | 77     |        |    |
| 2004                                | 181                |      |          | 141  | 257   | 73    | 34.48  | 26.80  | 48.95  | 75     |        |    |
| 2005                                | 190                |      |          | 139  | 305   | 73    | 34.92  | 25.55  | 56.12  | 74     |        |    |
| 2006                                | 200                |      |          | 133  | 359   | 73    | 35.54  | 23.72  | 63.90  | 74     |        |    |
| 2007                                | 208                | 120  | 412      | 73   | 36.03 | 20.70 | 71.30  | 74     |        |        |        |    |

| Metropolitan Statistical Area       | PWID Population | Year   | Number | Min   | Max   | Rank  | Rate  | Min    | Max    | Rank  |    |
|-------------------------------------|-----------------|--------|--------|-------|-------|-------|-------|--------|--------|-------|----|
| Grand Rapids--Muskegon--Holland, MI | Male            | 1992   | 2,279  | 1,857 | 2,593 | 88    | 73.44 | 59.83  | 83.54  | 94    |    |
|                                     |                 | 1993   | 1,880  | 995   | 2,448 | 88    | 59.68 | 31.61  | 77.71  | 97    |    |
|                                     |                 | 1994   | 2,087  | 1,677 | 2,324 | 89    | 65.03 | 52.28  | 72.43  | 97    |    |
|                                     |                 | 1995   | 1,809  | 1,218 | 2,209 | 88    | 55.28 | 37.22  | 67.52  | 97    |    |
|                                     |                 | 1996   | 1,785  | 1,337 | 2,170 | 88    | 53.41 | 40.01  | 64.93  | 97    |    |
|                                     |                 | 1997   | 1,762  | 1,454 | 2,132 | 88    | 51.74 | 42.68  | 62.60  | 98    |    |
|                                     |                 | 1998   | 1,762  | 1,444 | 2,094 | 88    | 50.88 | 41.69  | 60.47  | 98    |    |
|                                     |                 | 1999   | 1,775  | 1,440 | 2,066 | 89    | 50.28 | 40.79  | 58.53  | 98    |    |
|                                     |                 | 2000   | 1,783  | 1,522 | 2,040 | 88    | 49.65 | 42.37  | 56.80  | 97    |    |
|                                     |                 | 2001   | 1,774  | 1,605 | 2,014 | 89    | 48.61 | 43.98  | 55.18  | 98    |    |
|                                     |                 | 2002   | 1,888  | 1,661 | 1,997 | 88    | 51.10 | 44.97  | 54.04  | 97    |    |
|                                     |                 | 2003   | 1,957  | 1,618 | 2,394 | 88    | 52.37 | 43.30  | 64.06  | 97    |    |
|                                     |                 | 2004   | 2,034  | 1,581 | 2,888 | 88    | 53.89 | 41.89  | 76.51  | 97    |    |
|                                     |                 | 2005   | 2,113  | 1,546 | 3,394 | 88    | 55.34 | 40.49  | 88.93  | 97    |    |
|                                     |                 | 2006   | 2,198  | 1,467 | 3,951 | 88    | 57.04 | 38.08  | 102.56 | 97    |    |
|                                     | 2007            | 2,277  | 1,309  | 4,507 | 87    | 58.71 | 33.74 | 116.19 | 97     |       |    |
|                                     |                 | Female | 1992   | 941   | 767   | 1,071 | 92    | 29.79  | 24.27  | 33.89 | 97 |
|                                     |                 |        | 1993   | 832   | 440   | 1,083 | 92    | 26.02  | 13.78  | 33.88 | 98 |
|                                     |                 |        | 1994   | 981   | 789   | 1,093 | 92    | 30.21  | 24.29  | 33.65 | 96 |
|                                     |                 |        | 1995   | 896   | 603   | 1,095 | 91    | 27.14  | 18.27  | 33.15 | 99 |
|                                     |                 |        | 1996   | 925   | 693   | 1,124 | 91    | 27.50  | 20.60  | 33.43 | 98 |
|                                     |                 |        | 1997   | 948   | 782   | 1,147 | 89    | 27.70  | 22.85  | 33.52 | 96 |
|                                     |                 |        | 1998   | 976   | 800   | 1,161 | 89    | 28.15  | 23.06  | 33.46 | 96 |
|                                     |                 |        | 1999   | 1,007 | 817   | 1,172 | 91    | 28.56  | 23.17  | 33.24 | 97 |
|                                     |                 |        | 2000   | 1,029 | 879   | 1,178 | 91    | 28.72  | 24.51  | 32.85 | 97 |
|                                     | 2001            |        | 1,036  | 937   | 1,176 | 93    | 28.49 | 25.78  | 32.34  | 98    |    |
|                                     | 2002            | 1,110  | 976    | 1,173 | 92    | 30.17 | 26.54 | 31.90  | 97     |       |    |
|                                     | 2003            | 1,151  | 952    | 1,408 | 91    | 31.01 | 25.64 | 37.93  | 97     |       |    |
|                                     | 2004            | 1,193  | 927    | 1,693 | 91    | 31.82 | 24.73 | 45.17  | 97     |       |    |
|                                     | 2005            | 1,229  | 899    | 1,975 | 91    | 32.45 | 23.74 | 52.15  | 97     |       |    |
|                                     | 2006            | 1,264  | 844    | 2,273 | 89    | 33.11 | 22.10 | 59.52  | 95     |       |    |
|                                     | 2007            | 1,291  | 742    | 2,555 | 89    | 33.57 | 19.29 | 66.43  | 94     |       |    |

| Metropolitan Statistical Area       | PWID Population | Year | Number      | Min   | Max   | Rank  | Rate  | Min   | Max    | Rank  |       |    |
|-------------------------------------|-----------------|------|-------------|-------|-------|-------|-------|-------|--------|-------|-------|----|
| Grand Rapids--Muskegon--Holland, MI | Young (15-29)   | 1992 | 819         | 667   | 932   | 86    | 37.37 | 30.45 | 42.51  | 95    |       |    |
|                                     |                 | 1993 | 672         | 356   | 875   | 89    | 30.71 | 16.26 | 39.99  | 95    |       |    |
|                                     |                 | 1994 | 747         | 601   | 833   | 89    | 34.00 | 27.33 | 37.86  | 96    |       |    |
|                                     |                 | 1995 | 654         | 441   | 799   | 92    | 29.43 | 19.82 | 35.95  | 95    |       |    |
|                                     |                 | 1996 | 658         | 493   | 800   | 92    | 29.13 | 21.82 | 35.42  | 95    |       |    |
|                                     |                 | 1997 | 668         | 551   | 808   | 92    | 29.10 | 24.01 | 35.21  | 97    |       |    |
|                                     |                 | 1998 | 693         | 568   | 824   | 92    | 29.79 | 24.41 | 35.41  | 97    |       |    |
|                                     |                 | 1999 | 732         | 594   | 852   | 92    | 31.08 | 25.22 | 36.18  | 99    |       |    |
|                                     |                 | 2000 | 779         | 665   | 891   | 92    | 32.73 | 27.93 | 37.44  | 98    |       |    |
|                                     |                 | 2001 | 830         | 751   | 942   | 94    | 34.53 | 31.24 | 39.20  | 100   |       |    |
|                                     |                 | 2002 | 955         | 840   | 1,010 | 91    | 39.41 | 34.68 | 41.67  | 99    |       |    |
|                                     |                 | 2003 | 1,080       | 893   | 1,322 | 91    | 44.14 | 36.50 | 53.99  | 97    |       |    |
|                                     |                 | 2004 | 1,236       | 960   | 1,754 | 89    | 50.09 | 38.93 | 71.11  | 94    |       |    |
|                                     |                 | 2005 | 1,421       | 1,039 | 2,283 | 87    | 57.02 | 41.72 | 91.62  | 88    |       |    |
|                                     |                 | 2006 | 1,643       | 1,097 | 2,954 | 80    | 65.46 | 43.70 | 117.69 | 85    |       |    |
|                                     |                 | 2007 | 1,895       | 1,089 | 3,749 | 76    | 75.30 | 43.27 | 149.02 | 68    |       |    |
|                                     |                 |      | Old (30-64) | 1992  | 2,416 | 1,969 | 2,749 | 88    | 59.37  | 48.37 | 67.54 | 93 |
|                                     |                 |      |             | 1993  | 2,041 | 1,081 | 2,657 | 89    | 49.09  | 26.00 | 63.91 | 95 |
|                                     |                 |      |             | 1994  | 2,314 | 1,860 | 2,577 | 89    | 54.36  | 43.70 | 60.55 | 94 |
|                                     |                 |      |             | 1995  | 2,043 | 1,376 | 2,496 | 88    | 46.97  | 31.62 | 57.37 | 95 |
| 1996                                | 2,045           |      |             | 1,532 | 2,487 | 88    | 45.99 | 34.46 | 55.92  | 96    |       |    |
| 1997                                | 2,038           |      |             | 1,682 | 2,467 | 88    | 44.98 | 37.11 | 54.43  | 96    |       |    |
| 1998                                | 2,046           |      |             | 1,676 | 2,432 | 88    | 44.42 | 36.40 | 52.80  | 95    |       |    |
| 1999                                | 2,055           |      |             | 1,667 | 2,392 | 89    | 43.71 | 35.46 | 50.88  | 97    |       |    |
| 2000                                | 2,042           |      |             | 1,743 | 2,336 | 88    | 42.59 | 36.35 | 48.72  | 95    |       |    |
| 2001                                | 1,991           |      |             | 1,802 | 2,260 | 88    | 40.79 | 36.90 | 46.30  | 97    |       |    |
| 2002                                | 2,054           |      |             | 1,807 | 2,172 | 88    | 41.50 | 36.52 | 43.89  | 95    |       |    |
| 2003                                | 2,034           |      |             | 1,682 | 2,488 | 88    | 40.65 | 33.61 | 49.73  | 95    |       |    |
| 2004                                | 1,983           |      |             | 1,541 | 2,815 | 88    | 39.21 | 30.48 | 55.66  | 95    |       |    |
| 2005                                | 1,885           |      |             | 1,379 | 3,028 | 88    | 36.86 | 26.96 | 59.22  | 96    |       |    |
| 2006                                | 1,737           |      |             | 1,160 | 3,124 | 93    | 33.66 | 22.47 | 60.51  | 96    |       |    |
| 2007                                | 1,531           | 880  | 3,029       | 94    | 29.38 | 16.88 | 58.14 | 99    |        |       |       |    |



| Metropolitan Statistical Area             | PWID Population | Year  | Number             | Min   | Max   | Rank  | Rate  | Min   | Max    | Rank  |       |    |
|-------------------------------------------|-----------------|-------|--------------------|-------|-------|-------|-------|-------|--------|-------|-------|----|
| Greensboro--Winston-Salem--High Point, NC | Total           | 1992  | 6,553              | 4,659 | 8,067 | 65    | 88.40 | 62.86 | 108.83 | 63    |       |    |
|                                           |                 | 1993  | 5,275              | 1,684 | 7,673 | 75    | 70.14 | 22.39 | 102.02 | 77    |       |    |
|                                           |                 | 1994  | 6,401              | 4,779 | 7,285 | 66    | 83.70 | 62.49 | 95.25  | 66    |       |    |
|                                           |                 | 1995  | 5,184              | 1,690 | 7,269 | 74    | 66.52 | 21.68 | 93.28  | 78    |       |    |
|                                           |                 | 1996  | 5,149              | 1,711 | 7,381 | 75    | 64.85 | 21.55 | 92.97  | 77    |       |    |
|                                           |                 | 1997  | 5,112              | 1,740 | 7,481 | 75    | 63.32 | 21.56 | 92.66  | 77    |       |    |
|                                           |                 | 1998  | 5,080              | 1,772 | 7,575 | 77    | 61.83 | 21.56 | 92.19  | 77    |       |    |
|                                           |                 | 1999  | 6,115              | 5,094 | 7,644 | 67    | 73.38 | 61.13 | 91.72  | 68    |       |    |
|                                           |                 | 2000  | 4,997              | 1,882 | 7,777 | 79    | 59.14 | 22.27 | 92.04  | 78    |       |    |
|                                           |                 | 2001  | 5,947              | 4,941 | 7,894 | 71    | 69.57 | 57.81 | 92.35  | 72    |       |    |
|                                           |                 | 2002  | 4,893              | 2,018 | 8,014 | 80    | 56.72 | 23.39 | 92.92  | 81    |       |    |
|                                           |                 | 2003  | 4,829              | 2,080 | 8,116 | 81    | 55.62 | 23.95 | 93.48  | 83    |       |    |
|                                           |                 | 2004  | 4,779              | 2,154 | 8,223 | 81    | 54.54 | 24.58 | 93.84  | 86    |       |    |
|                                           |                 | 2005  | 4,757              | 2,236 | 8,377 | 81    | 53.49 | 25.14 | 94.19  | 93    |       |    |
|                                           |                 | 2006  | 4,750              | 2,327 | 8,560 | 82    | 52.44 | 25.69 | 94.51  | 93    |       |    |
|                                           |                 | 2007  | 4,725              | 2,400 | 8,724 | 81    | 51.36 | 26.09 | 94.83  | 92    |       |    |
|                                           |                 |       | Non-Hispanic White | 1992  | 3,495 | 2,485 | 4,303 | 64    | 60.32  | 42.90 | 74.26 | 61 |
|                                           |                 |       |                    | 1993  | 2,845 | 909   | 4,139 | 69    | 48.70  | 15.55 | 70.84 | 71 |
|                                           |                 |       |                    | 1994  | 3,489 | 2,605 | 3,970 | 66    | 59.15  | 44.16 | 67.31 | 62 |
|                                           |                 |       |                    | 1995  | 2,853 | 930   | 4,000 | 68    | 47.85  | 15.60 | 67.09 | 71 |
| 1996                                      | 2,861           |       |                    | 951   | 4,101 | 72    | 47.48 | 15.78 | 68.07  | 71    |       |    |
| 1997                                      | 2,867           |       |                    | 976   | 4,196 | 72    | 47.25 | 16.09 | 69.14  | 72    |       |    |
| 1998                                      | 2,877           |       |                    | 1,003 | 4,289 | 73    | 47.09 | 16.42 | 70.21  | 73    |       |    |
| 1999                                      | 3,497           |       |                    | 2,913 | 4,371 | 65    | 57.12 | 47.58 | 71.40  | 66    |       |    |
| 2000                                      | 2,887           |       |                    | 1,087 | 4,492 | 72    | 47.10 | 17.74 | 73.31  | 74    |       |    |
| 2001                                      | 3,473           |       |                    | 2,885 | 4,610 | 65    | 56.47 | 46.92 | 74.96  | 69    |       |    |
| 2002                                      | 2,890           |       |                    | 1,192 | 4,734 | 73    | 46.90 | 19.34 | 76.83  | 76    |       |    |
| 2003                                      | 2,887           |       |                    | 1,243 | 4,852 | 74    | 46.87 | 20.18 | 78.76  | 76    |       |    |
| 2004                                      | 2,895           |       |                    | 1,305 | 4,980 | 76    | 46.89 | 21.13 | 80.67  | 80    |       |    |
| 2005                                      | 2,921           |       |                    | 1,373 | 5,144 | 76    | 46.98 | 22.08 | 82.73  | 80    |       |    |
| 2006                                      | 2,958           | 1,449 | 5,332              | 77    | 47.10 | 23.07 | 84.88 | 81    |        |       |       |    |
| 2007                                      | 2,987           | 1,518 | 5,516              | 78    | 47.23 | 24.00 | 87.20 | 84    |        |       |       |    |

| Metropolitan Statistical Area             | PWID Population    | Year | Number   | Min   | Max   | Rank | Rate   | Min    | Max    | Rank  |       |    |
|-------------------------------------------|--------------------|------|----------|-------|-------|------|--------|--------|--------|-------|-------|----|
| Greensboro--Winston-Salem--High Point, NC | Non-Hispanic Black | 1992 | 2,871    | 2,041 | 3,534 | 39   | 197.88 | 140.71 | 243.60 | 78    |       |    |
|                                           |                    | 1993 | 2,233    | 713   | 3,249 | 45   | 150.29 | 47.99  | 218.60 | 84    |       |    |
|                                           |                    | 1994 | 2,620    | 1,956 | 2,982 | 38   | 172.02 | 128.43 | 195.76 | 78    |       |    |
|                                           |                    | 1995 | 2,052    | 669   | 2,878 | 45   | 131.38 | 42.82  | 184.23 | 85    |       |    |
|                                           |                    | 1996 | 1,972    | 655   | 2,827 | 47   | 123.53 | 41.04  | 177.08 | 85    |       |    |
|                                           |                    | 1997 | 1,895    | 645   | 2,773 | 47   | 116.38 | 39.62  | 170.30 | 84    |       |    |
|                                           |                    | 1998 | 1,823    | 636   | 2,718 | 48   | 109.82 | 38.30  | 163.74 | 85    |       |    |
|                                           |                    | 1999 | 2,125    | 1,770 | 2,656 | 39   | 126.17 | 105.10 | 157.71 | 81    |       |    |
|                                           |                    | 2000 | 1,683    | 634   | 2,619 | 49   | 98.32  | 37.02  | 153.02 | 86    |       |    |
|                                           |                    | 2001 | 1,942    | 1,614 | 2,578 | 41   | 111.40 | 92.56  | 147.88 | 80    |       |    |
|                                           |                    | 2002 | 1,551    | 640   | 2,541 | 53   | 87.44  | 36.06  | 143.24 | 86    |       |    |
|                                           |                    | 2003 | 1,488    | 641   | 2,501 | 54   | 82.72  | 35.62  | 139.02 | 87    |       |    |
|                                           |                    | 2004 | 1,434    | 646   | 2,468 | 55   | 78.16  | 35.23  | 134.49 | 87    |       |    |
|                                           |                    | 2005 | 1,393    | 655   | 2,453 | 55   | 74.09  | 34.82  | 130.47 | 86    |       |    |
|                                           |                    | 2006 | 1,362    | 667   | 2,454 | 56   | 70.33  | 34.45  | 126.74 | 87    |       |    |
|                                           |                    | 2007 | 1,332    | 677   | 2,459 | 57   | 67.07  | 34.08  | 123.84 | 87    |       |    |
|                                           |                    |      | Hispanic | 1992  | 26    | 18   | 31     | 92     | 31.91  | 22.69 | 39.28 | 94 |
|                                           |                    |      |          | 1993  | 22    | 7    | 32     | 92     | 22.73  | 7.26  | 33.06 | 95 |
|                                           |                    |      |          | 1994  | 30    | 22   | 34     | 92     | 24.10  | 18.00 | 27.43 | 95 |
|                                           |                    |      |          | 1995  | 27    | 9    | 38     | 92     | 17.52  | 5.71  | 24.57 | 97 |
| 1996                                      | 31                 |      |          | 10    | 44    | 91   | 15.74  | 5.23   | 22.56  | 97    |       |    |
| 1997                                      | 35                 |      |          | 12    | 51    | 91   | 14.28  | 4.86   | 20.89  | 99    |       |    |
| 1998                                      | 40                 |      |          | 14    | 60    | 89   | 13.14  | 4.58   | 19.59  | 99    |       |    |
| 1999                                      | 55                 |      |          | 46    | 69    | 89   | 14.94  | 12.44  | 18.67  | 96    |       |    |
| 2000                                      | 52                 |      |          | 20    | 81    | 89   | 11.80  | 4.44   | 18.37  | 98    |       |    |
| 2001                                      | 71                 |      |          | 59    | 94    | 87   | 14.77  | 12.27  | 19.61  | 95    |       |    |
| 2002                                      | 66                 |      |          | 27    | 108   | 88   | 12.95  | 5.34   | 21.21  | 97    |       |    |
| 2003                                      | 73                 |      |          | 31    | 122   | 88   | 13.59  | 5.85   | 22.83  | 97    |       |    |
| 2004                                      | 79                 |      |          | 36    | 136   | 88   | 14.03  | 6.32   | 24.14  | 97    |       |    |
| 2005                                      | 84                 |      |          | 40    | 149   | 87   | 14.17  | 6.66   | 24.96  | 97    |       |    |
| 2006                                      | 89                 | 43   | 160      | 87    | 14.02 | 6.87 | 25.28  | 98     |        |       |       |    |
| 2007                                      | 90                 | 46   | 167      | 86    | 13.45 | 6.83 | 24.83  | 97     |        |       |       |    |

| Metropolitan Statistical Area             | PWID Population | Year   | Number | Min   | Max   | Rank  | Rate   | Min    | Max    | Rank  |    |
|-------------------------------------------|-----------------|--------|--------|-------|-------|-------|--------|--------|--------|-------|----|
| Greensboro--Winston-Salem--High Point, NC | Male            | 1992   | 4,217  | 2,999 | 5,192 | 68    | 116.79 | 83.04  | 143.77 | 63    |    |
|                                           |                 | 1993   | 3,369  | 1,076 | 4,900 | 75    | 92.03  | 29.38  | 133.85 | 78    |    |
|                                           |                 | 1994   | 4,062  | 3,033 | 4,623 | 68    | 109.01 | 81.39  | 124.06 | 69    |    |
|                                           |                 | 1995   | 3,273  | 1,067 | 4,590 | 77    | 86.15  | 28.08  | 120.80 | 78    |    |
|                                           |                 | 1996   | 3,239  | 1,076 | 4,643 | 77    | 83.63  | 27.79  | 119.89 | 78    |    |
|                                           |                 | 1997   | 3,207  | 1,092 | 4,694 | 78    | 81.35  | 27.69  | 119.04 | 78    |    |
|                                           |                 | 1998   | 3,182  | 1,110 | 4,744 | 78    | 79.25  | 27.64  | 118.16 | 79    |    |
|                                           |                 | 1999   | 3,827  | 3,188 | 4,784 | 69    | 93.80  | 78.14  | 117.25 | 68    |    |
|                                           |                 | 2000   | 3,127  | 1,178 | 4,867 | 80    | 75.36  | 28.38  | 117.29 | 78    |    |
|                                           |                 | 2001   | 3,723  | 3,094 | 4,943 | 73    | 88.73  | 73.72  | 117.78 | 71    |    |
|                                           |                 | 2002   | 3,066  | 1,265 | 5,023 | 80    | 72.46  | 29.88  | 118.69 | 80    |    |
|                                           |                 | 2003   | 3,031  | 1,305 | 5,094 | 82    | 71.34  | 30.72  | 119.90 | 80    |    |
|                                           |                 | 2004   | 3,004  | 1,354 | 5,169 | 83    | 69.99  | 31.55  | 120.43 | 83    |    |
|                                           |                 | 2005   | 2,995  | 1,407 | 5,274 | 84    | 68.80  | 32.33  | 121.15 | 87    |    |
|                                           |                 | 2006   | 2,995  | 1,467 | 5,397 | 83    | 67.44  | 33.04  | 121.55 | 88    |    |
|                                           | 2007            | 2,983  | 1,516  | 5,508 | 80    | 66.29 | 33.68  | 122.41 | 88     |       |    |
|                                           |                 | Female | 1992   | 2,407 | 1,711 | 2,963 | 63     | 63.31  | 45.02  | 77.94 | 62 |
|                                           |                 |        | 1993   | 1,961 | 626   | 2,853 | 68     | 50.81  | 16.22  | 73.91 | 71 |
|                                           |                 |        | 1994   | 2,406 | 1,796 | 2,738 | 63     | 61.35  | 45.80  | 69.81 | 62 |
|                                           |                 |        | 1995   | 1,966 | 641   | 2,756 | 71     | 49.23  | 16.05  | 69.03 | 76 |
|                                           |                 |        | 1996   | 1,966 | 653   | 2,819 | 71     | 48.36  | 16.07  | 69.33 | 77 |
|                                           |                 |        | 1997   | 1,963 | 668   | 2,873 | 73     | 47.52  | 16.18  | 69.54 | 76 |
|                                           |                 |        | 1998   | 1,958 | 683   | 2,919 | 74     | 46.60  | 16.25  | 69.49 | 76 |
|                                           |                 |        | 1999   | 2,361 | 1,967 | 2,951 | 64     | 55.50  | 46.23  | 69.38 | 67 |
|                                           |                 |        | 2000   | 1,929 | 726   | 3,002 | 76     | 44.85  | 16.89  | 69.81 | 77 |
|                                           | 2001            |        | 2,291  | 1,903 | 3,041 | 68    | 52.64  | 43.74  | 69.88  | 69    |    |
|                                           | 2002            | 1,877  | 774    | 3,074 | 77    | 42.71 | 17.61  | 69.97  | 84     |       |    |
|                                           | 2003            | 1,841  | 793    | 3,093 | 77    | 41.51 | 17.88  | 69.76  | 84     |       |    |
|                                           | 2004            | 1,806  | 814    | 3,108 | 80    | 40.39 | 18.20  | 69.49  | 86     |       |    |
|                                           | 2005            | 1,778  | 836    | 3,132 | 81    | 39.17 | 18.41  | 68.97  | 88     |       |    |
|                                           | 2006            | 1,752  | 858    | 3,158 | 82    | 37.95 | 18.59  | 68.40  | 92     |       |    |
|                                           | 2007            | 1,716  | 872    | 3,169 | 81    | 36.51 | 18.55  | 67.42  | 91     |       |    |

| Metropolitan Statistical Area             | PWID Population | Year  | Number      | Min   | Max   | Rank  | Rate  | Min   | Max    | Rank  |        |    |
|-------------------------------------------|-----------------|-------|-------------|-------|-------|-------|-------|-------|--------|-------|--------|----|
| Greensboro--Winston-Salem--High Point, NC | Young (15-29)   | 1992  | 1,808       | 1,286 | 2,226 | 63    | 73.13 | 52.00 | 90.03  | 61    |        |    |
|                                           |                 | 1993  | 1,341       | 428   | 1,950 | 74    | 54.51 | 17.40 | 79.29  | 69    |        |    |
|                                           |                 | 1994  | 1,541       | 1,151 | 1,754 | 71    | 62.59 | 46.73 | 71.22  | 66    |        |    |
|                                           |                 | 1995  | 1,212       | 395   | 1,700 | 75    | 48.94 | 15.95 | 68.63  | 73    |        |    |
|                                           |                 | 1996  | 1,196       | 398   | 1,715 | 78    | 47.95 | 15.93 | 68.74  | 74    |        |    |
|                                           |                 | 1997  | 1,203       | 410   | 1,760 | 77    | 47.75 | 16.26 | 69.88  | 77    |        |    |
|                                           |                 | 1998  | 1,228       | 428   | 1,832 | 78    | 48.32 | 16.85 | 72.05  | 78    |        |    |
|                                           |                 | 1999  | 1,536       | 1,280 | 1,920 | 76    | 60.16 | 50.12 | 75.20  | 71    |        |    |
|                                           |                 | 2000  | 1,313       | 494   | 2,043 | 80    | 51.02 | 19.21 | 79.41  | 80    |        |    |
|                                           |                 | 2001  | 1,638       | 1,361 | 2,175 | 77    | 64.06 | 53.23 | 85.04  | 76    |        |    |
|                                           |                 | 2002  | 1,412       | 582   | 2,313 | 82    | 55.48 | 22.88 | 90.87  | 80    |        |    |
|                                           |                 | 2003  | 1,453       | 626   | 2,443 | 81    | 57.54 | 24.78 | 96.69  | 81    |        |    |
|                                           |                 | 2004  | 1,488       | 671   | 2,561 | 81    | 58.66 | 26.44 | 100.93 | 86    |        |    |
|                                           |                 | 2005  | 1,516       | 712   | 2,669 | 81    | 58.80 | 27.63 | 103.54 | 86    |        |    |
|                                           |                 | 2006  | 1,527       | 748   | 2,751 | 82    | 57.85 | 28.34 | 104.25 | 91    |        |    |
|                                           |                 | 2007  | 1,506       | 765   | 2,781 | 83    | 56.48 | 28.69 | 104.28 | 91    |        |    |
|                                           |                 |       | Old (30-64) | 1992  | 4,857 | 3,453 | 5,979 | 62    | 98.32  | 69.92 | 121.04 | 66 |
|                                           |                 |       |             | 1993  | 3,985 | 1,272 | 5,796 | 72    | 78.73  | 25.14 | 114.51 | 77 |
|                                           |                 |       |             | 1994  | 4,898 | 3,657 | 5,574 | 63    | 94.45  | 70.52 | 107.49 | 64 |
|                                           |                 |       |             | 1995  | 3,998 | 1,303 | 5,607 | 72    | 75.22  | 24.52 | 105.48 | 77 |
| 1996                                      | 3,986           |       |             | 1,324 | 5,714 | 73    | 73.22 | 24.33 | 104.96 | 76    |        |    |
| 1997                                      | 3,956           |       |             | 1,347 | 5,790 | 72    | 71.22 | 24.25 | 104.22 | 75    |        |    |
| 1998                                      | 3,915           |       |             | 1,365 | 5,837 | 73    | 69.00 | 24.06 | 102.88 | 75    |        |    |
| 1999                                      | 4,676           |       |             | 3,895 | 5,844 | 67    | 80.89 | 67.38 | 101.11 | 68    |        |    |
| 2000                                      | 3,777           |       |             | 1,422 | 5,878 | 74    | 64.26 | 24.20 | 100.01 | 75    |        |    |
| 2001                                      | 4,427           |       |             | 3,678 | 5,876 | 68    | 73.90 | 61.41 | 98.10  | 68    |        |    |
| 2002                                      | 3,575           |       |             | 1,474 | 5,856 | 76    | 58.79 | 24.24 | 96.31  | 78    |        |    |
| 2003                                      | 3,451           |       |             | 1,486 | 5,800 | 77    | 56.06 | 24.14 | 94.21  | 77    |        |    |
| 2004                                      | 3,330           |       |             | 1,501 | 5,729 | 77    | 53.47 | 24.10 | 92.01  | 78    |        |    |
| 2005                                      | 3,220           |       |             | 1,513 | 5,671 | 77    | 50.99 | 23.96 | 89.78  | 82    |        |    |
| 2006                                      | 3,113           | 1,525 | 5,610       | 76    | 48.50 | 23.76 | 87.42 | 85    |        |       |        |    |
| 2007                                      | 2,987           | 1,518 | 5,516       | 77    | 45.73 | 23.23 | 84.43 | 85    |        |       |        |    |

| Metropolitan Statistical Area         | PWID Population | Year | Number             | Min   | Max   | Rank  | Rate  | Min   | Max   | Rank  |       |    |
|---------------------------------------|-----------------|------|--------------------|-------|-------|-------|-------|-------|-------|-------|-------|----|
| Greenville--Spartanburg--Anderson, SC | Total           | 1992 | 2,831              | 1,855 | 3,329 | 91    | 49.28 | 32.29 | 57.95 | 97    |       |    |
|                                       |                 | 1993 | 2,274              | 749   | 3,386 | 94    | 39.11 | 12.88 | 58.23 | 98    |       |    |
|                                       |                 | 1994 | 2,742              | 1,841 | 3,455 | 92    | 46.55 | 31.25 | 58.67 | 97    |       |    |
|                                       |                 | 1995 | 2,318              | 1,132 | 3,539 | 93    | 38.72 | 18.91 | 59.10 | 98    |       |    |
|                                       |                 | 1996 | 2,352              | 1,327 | 3,632 | 92    | 38.65 | 21.80 | 59.67 | 99    |       |    |
|                                       |                 | 1997 | 2,385              | 1,515 | 3,721 | 92    | 38.60 | 24.53 | 60.23 | 98    |       |    |
|                                       |                 | 1998 | 2,426              | 1,717 | 3,818 | 92    | 38.60 | 27.32 | 60.74 | 98    |       |    |
|                                       |                 | 1999 | 2,655              | 1,881 | 3,918 | 91    | 41.50 | 29.40 | 61.24 | 97    |       |    |
|                                       |                 | 2000 | 2,472              | 1,822 | 4,079 | 92    | 38.08 | 28.07 | 62.83 | 98    |       |    |
|                                       |                 | 2001 | 2,717              | 1,906 | 4,229 | 92    | 41.39 | 29.03 | 64.41 | 97    |       |    |
|                                       |                 | 2002 | 2,511              | 1,745 | 4,385 | 92    | 37.90 | 26.33 | 66.18 | 98    |       |    |
|                                       |                 | 2003 | 2,534              | 1,663 | 4,540 | 93    | 37.93 | 24.89 | 67.95 | 98    |       |    |
|                                       |                 | 2004 | 2,575              | 1,556 | 4,708 | 93    | 38.14 | 23.05 | 69.72 | 98    |       |    |
|                                       |                 | 2005 | 2,624              | 1,458 | 4,886 | 94    | 38.39 | 21.34 | 71.49 | 99    |       |    |
|                                       |                 | 2006 | 2,689              | 1,373 | 5,094 | 95    | 38.67 | 19.74 | 73.26 | 99    |       |    |
|                                       |                 | 2007 | 2,762              | 1,287 | 5,319 | 95    | 38.96 | 18.16 | 75.02 | 99    |       |    |
|                                       |                 |      | Non-Hispanic White | 1992  | 1,587 | 1,040 | 1,866 | 92    | 33.99 | 22.28 | 39.97 | 95 |
|                                       |                 |      |                    | 1993  | 1,326 | 436   | 1,974 | 95    | 28.17 | 9.27  | 41.94 | 96 |
|                                       |                 |      |                    | 1994  | 1,651 | 1,108 | 2,081 | 89    | 34.77 | 23.35 | 43.83 | 89 |
|                                       |                 |      |                    | 1995  | 1,435 | 701   | 2,190 | 93    | 29.89 | 14.59 | 45.62 | 92 |
| 1996                                  | 1,490           |      |                    | 841   | 2,301 | 89    | 30.66 | 17.30 | 47.34 | 91    |       |    |
| 1997                                  | 1,541           |      |                    | 979   | 2,405 | 88    | 31.40 | 19.96 | 49.00 | 89    |       |    |
| 1998                                  | 1,595           |      |                    | 1,129 | 2,510 | 88    | 32.07 | 22.70 | 50.47 | 89    |       |    |
| 1999                                  | 1,771           |      |                    | 1,255 | 2,614 | 86    | 35.19 | 24.93 | 51.94 | 92    |       |    |
| 2000                                  | 1,670           |      |                    | 1,231 | 2,756 | 88    | 32.90 | 24.26 | 54.29 | 91    |       |    |
| 2001                                  | 1,857           |      |                    | 1,303 | 2,890 | 86    | 36.33 | 25.48 | 56.54 | 92    |       |    |
| 2002                                  | 1,733           |      |                    | 1,204 | 3,027 | 92    | 33.77 | 23.46 | 58.97 | 94    |       |    |
| 2003                                  | 1,766           |      |                    | 1,159 | 3,163 | 93    | 34.26 | 22.48 | 61.38 | 95    |       |    |
| 2004                                  | 1,809           |      |                    | 1,093 | 3,307 | 93    | 34.90 | 21.09 | 63.79 | 95    |       |    |
| 2005                                  | 1,858           |      |                    | 1,033 | 3,459 | 93    | 35.58 | 19.78 | 66.25 | 95    |       |    |
| 2006                                  | 1,918           |      |                    | 979   | 3,633 | 88    | 36.27 | 18.52 | 68.71 | 95    |       |    |
| 2007                                  | 1,984           | 924  | 3,820              | 87    | 36.99 | 17.23 | 71.21 | 91    |       |       |       |    |

| Metropolitan Statistical Area         | PWID Population    | Year | Number   | Min  | Max   | Rank | Rate   | Min   | Max    | Rank  |       |    |
|---------------------------------------|--------------------|------|----------|------|-------|------|--------|-------|--------|-------|-------|----|
| Greenville--Spartanburg--Anderson, SC | Non-Hispanic Black | 1992 | 1,246    | 817  | 1,465 | 68   | 128.72 | 84.35 | 151.35 | 92    |       |    |
|                                       |                    | 1993 | 913      | 300  | 1,359 | 79   | 92.34  | 30.40 | 137.48 | 96    |       |    |
|                                       |                    | 1994 | 1,007    | 676  | 1,269 | 73   | 99.80  | 67.00 | 125.77 | 95    |       |    |
|                                       |                    | 1995 | 783      | 382  | 1,195 | 81   | 75.80  | 37.01 | 115.71 | 97    |       |    |
|                                       |                    | 1996 | 735      | 414  | 1,134 | 81   | 69.77  | 39.35 | 107.72 | 97    |       |    |
|                                       |                    | 1997 | 693      | 440  | 1,081 | 80   | 64.85  | 41.21 | 101.20 | 98    |       |    |
|                                       |                    | 1998 | 660      | 467  | 1,038 | 79   | 60.90  | 43.10 | 95.84  | 97    |       |    |
|                                       |                    | 1999 | 680      | 482  | 1,004 | 80   | 61.90  | 43.86 | 91.35  | 97    |       |    |
|                                       |                    | 2000 | 601      | 443  | 992   | 80   | 53.75  | 39.62 | 88.68  | 96    |       |    |
|                                       |                    | 2001 | 631      | 443  | 983   | 80   | 55.57  | 38.98 | 86.49  | 96    |       |    |
|                                       |                    | 2002 | 561      | 390  | 981   | 81   | 48.70  | 33.84 | 85.04  | 97    |       |    |
|                                       |                    | 2003 | 549      | 360  | 984   | 80   | 46.93  | 30.80 | 84.07  | 98    |       |    |
|                                       |                    | 2004 | 545      | 329  | 996   | 80   | 45.79  | 27.67 | 83.70  | 98    |       |    |
|                                       |                    | 2005 | 546      | 303  | 1,016 | 80   | 45.02  | 25.02 | 83.83  | 98    |       |    |
|                                       |                    | 2006 | 554      | 283  | 1,050 | 79   | 44.75  | 22.85 | 84.78  | 97    |       |    |
|                                       |                    | 2007 | 569      | 265  | 1,095 | 79   | 45.07  | 21.00 | 86.77  | 97    |       |    |
|                                       |                    |      | Hispanic | 1992 | 21    | 14   | 24     | 94    | 37.42  | 24.52 | 44.00 | 92 |
|                                       |                    |      |          | 1993 | 18    | 6    | 27     | 95    | 28.13  | 9.26  | 41.88 | 94 |
|                                       |                    |      |          | 1994 | 23    | 15   | 29     | 95    | 32.03  | 21.50 | 40.36 | 93 |
|                                       |                    |      |          | 1995 | 20    | 10   | 31     | 95    | 24.06  | 11.75 | 36.73 | 93 |
| 1996                                  | 22                 |      |          | 12   | 34    | 95   | 22.07  | 12.45 | 34.07  | 93    |       |    |
| 1997                                  | 23                 |      |          | 15   | 36    | 94   | 19.21  | 12.21 | 29.98  | 93    |       |    |
| 1998                                  | 24                 |      |          | 17   | 38    | 94   | 17.16  | 12.14 | 27.00  | 93    |       |    |
| 1999                                  | 28                 |      |          | 19   | 41    | 93   | 16.33  | 11.57 | 24.10  | 95    |       |    |
| 2000                                  | 27                 |      |          | 20   | 44    | 93   | 13.78  | 10.16 | 22.74  | 96    |       |    |
| 2001                                  | 30                 |      |          | 21   | 47    | 94   | 14.43  | 10.12 | 22.46  | 96    |       |    |
| 2002                                  | 29                 |      |          | 20   | 51    | 95   | 12.93  | 8.99  | 22.58  | 98    |       |    |
| 2003                                  | 31                 |      |          | 21   | 56    | 95   | 12.97  | 8.51  | 23.23  | 98    |       |    |
| 2004                                  | 34                 |      |          | 20   | 62    | 95   | 13.26  | 8.02  | 24.25  | 98    |       |    |
| 2005                                  | 37                 |      |          | 21   | 69    | 95   | 13.65  | 7.59  | 25.42  | 98    |       |    |
| 2006                                  | 42                 | 21   | 79       | 95   | 14.17 | 7.23 | 26.83  | 97    |        |       |       |    |
| 2007                                  | 48                 | 22   | 92       | 94   | 14.90 | 6.94 | 28.69  | 96    |        |       |       |    |

| Metropolitan Statistical Area         | PWID Population | Year   | Number | Min   | Max   | Rank  | Rate  | Min   | Max   | Rank  |     |
|---------------------------------------|-----------------|--------|--------|-------|-------|-------|-------|-------|-------|-------|-----|
| Greenville--Spartanburg--Anderson, SC | Male            | 1992   | 2,036  | 1,334 | 2,393 | 91    | 71.85 | 47.08 | 84.48 | 96    |     |
|                                       |                 | 1993   | 1,620  | 533   | 2,412 | 93    | 56.52 | 18.60 | 84.14 | 98    |     |
|                                       |                 | 1994   | 1,930  | 1,295 | 2,432 | 92    | 66.51 | 44.65 | 83.82 | 96    |     |
|                                       |                 | 1995   | 1,609  | 786   | 2,456 | 93    | 54.57 | 26.65 | 83.30 | 98    |     |
|                                       |                 | 1996   | 1,607  | 907   | 2,481 | 91    | 53.59 | 30.23 | 82.74 | 96    |     |
|                                       |                 | 1997   | 1,601  | 1,018 | 2,499 | 91    | 52.58 | 33.41 | 82.05 | 97    |     |
|                                       |                 | 1998   | 1,599  | 1,132 | 2,517 | 91    | 51.56 | 36.49 | 81.13 | 97    |     |
|                                       |                 | 1999   | 1,716  | 1,216 | 2,533 | 91    | 54.19 | 38.39 | 79.96 | 97    |     |
|                                       |                 | 2000   | 1,567  | 1,155 | 2,585 | 91    | 48.65 | 35.86 | 80.27 | 98    |     |
|                                       |                 | 2001   | 1,688  | 1,184 | 2,628 | 91    | 51.86 | 36.38 | 80.71 | 97    |     |
|                                       |                 | 2002   | 1,531  | 1,064 | 2,673 | 92    | 46.57 | 32.36 | 81.31 | 98    |     |
|                                       |                 | 2003   | 1,518  | 996   | 2,719 | 93    | 45.77 | 30.04 | 82.00 | 99    |     |
|                                       |                 | 2004   | 1,518  | 917   | 2,775 | 94    | 45.27 | 27.36 | 82.76 | 99    |     |
|                                       |                 | 2005   | 1,527  | 849   | 2,843 | 95    | 44.95 | 24.99 | 83.71 | 99    |     |
|                                       |                 | 2006   | 1,550  | 791   | 2,936 | 97    | 44.87 | 22.91 | 85.00 | 100   |     |
|                                       | 2007            | 1,584  | 738    | 3,049 | 97    | 44.95 | 20.95 | 86.55 | 100   |       |     |
|                                       |                 | Female | 1992   | 779   | 511   | 916   | 93    | 26.76 | 17.53 | 31.46 | 98  |
|                                       |                 |        | 1993   | 656   | 216   | 977   | 95    | 22.25 | 7.32  | 33.12 | 100 |
|                                       |                 |        | 1994   | 830   | 557   | 1,046 | 93    | 27.77 | 18.65 | 35.00 | 99  |
|                                       |                 |        | 1995   | 736   | 360   | 1,124 | 94    | 24.24 | 11.84 | 37.00 | 100 |
|                                       |                 |        | 1996   | 784   | 442   | 1,210 | 94    | 25.38 | 14.31 | 39.18 | 100 |
|                                       |                 |        | 1997   | 831   | 528   | 1,297 | 94    | 26.54 | 16.86 | 41.41 | 99  |
|                                       |                 |        | 1998   | 883   | 625   | 1,389 | 95    | 27.72 | 19.62 | 43.63 | 97  |
|                                       |                 |        | 1999   | 1,005 | 712   | 1,483 | 93    | 31.10 | 22.04 | 45.90 | 95  |
|                                       |                 |        | 2000   | 969   | 714   | 1,598 | 93    | 29.60 | 21.82 | 48.85 | 96  |
|                                       | 2001            |        | 1,097  | 770   | 1,708 | 91    | 33.14 | 23.25 | 51.58 | 95    |     |
|                                       | 2002            | 1,039  | 722    | 1,815 | 94    | 31.12 | 21.62 | 54.34 | 96    |       |     |
|                                       | 2003            | 1,068  | 701    | 1,914 | 94    | 31.73 | 20.83 | 56.85 | 96    |       |     |
|                                       | 2004            | 1,099  | 664    | 2,008 | 93    | 32.33 | 19.53 | 59.09 | 96    |       |     |
|                                       | 2005            | 1,125  | 625    | 2,094 | 93    | 32.71 | 18.18 | 60.92 | 96    |       |     |
|                                       | 2006            | 1,149  | 586    | 2,176 | 92    | 32.82 | 16.76 | 62.18 | 96    |       |     |
|                                       | 2007            | 1,166  | 543    | 2,244 | 92    | 32.69 | 15.23 | 62.93 | 96    |       |     |

| Metropolitan Statistical Area         | PWID Population | Year | Number      | Min   | Max   | Rank  | Rate  | Min   | Max   | Rank  |       |    |
|---------------------------------------|-----------------|------|-------------|-------|-------|-------|-------|-------|-------|-------|-------|----|
| Greenville--Spartanburg--Anderson, SC | Young (15-29)   | 1992 | 884         | 579   | 1,039 | 85    | 44.73 | 29.32 | 52.60 | 83    |       |    |
|                                       |                 | 1993 | 675         | 222   | 1,005 | 88    | 34.37 | 11.31 | 51.17 | 91    |       |    |
|                                       |                 | 1994 | 792         | 531   | 998   | 87    | 40.53 | 27.21 | 51.08 | 86    |       |    |
|                                       |                 | 1995 | 664         | 324   | 1,014 | 91    | 33.91 | 16.56 | 51.77 | 91    |       |    |
|                                       |                 | 1996 | 681         | 384   | 1,051 | 91    | 34.41 | 19.41 | 53.13 | 91    |       |    |
|                                       |                 | 1997 | 706         | 449   | 1,102 | 91    | 35.44 | 22.52 | 55.30 | 91    |       |    |
|                                       |                 | 1998 | 743         | 526   | 1,170 | 91    | 36.92 | 26.13 | 58.10 | 91    |       |    |
|                                       |                 | 1999 | 847         | 600   | 1,250 | 91    | 41.69 | 29.54 | 61.52 | 91    |       |    |
|                                       |                 | 2000 | 823         | 607   | 1,359 | 91    | 40.40 | 29.79 | 66.67 | 88    |       |    |
|                                       |                 | 2001 | 945         | 663   | 1,471 | 91    | 46.51 | 32.62 | 72.39 | 89    |       |    |
|                                       |                 | 2002 | 909         | 632   | 1,588 | 94    | 44.92 | 31.21 | 78.45 | 92    |       |    |
|                                       |                 | 2003 | 950         | 623   | 1,702 | 94    | 46.79 | 30.71 | 83.83 | 94    |       |    |
|                                       |                 | 2004 | 991         | 599   | 1,811 | 95    | 48.41 | 29.25 | 88.49 | 95    |       |    |
|                                       |                 | 2005 | 1,024       | 569   | 1,908 | 93    | 49.43 | 27.47 | 92.04 | 97    |       |    |
|                                       |                 | 2006 | 1,051       | 537   | 1,992 | 93    | 49.85 | 25.45 | 94.44 | 97    |       |    |
|                                       |                 | 2007 | 1,065       | 496   | 2,050 | 94    | 49.69 | 23.16 | 95.67 | 95    |       |    |
|                                       |                 |      | Old (30-64) | 1992  | 1,982 | 1,299 | 2,331 | 94    | 52.59 | 34.46 | 61.83 | 96 |
|                                       |                 |      |             | 1993  | 1,633 | 538   | 2,431 | 95    | 42.41 | 13.96 | 63.14 | 99 |
|                                       |                 |      |             | 1994  | 2,001 | 1,343 | 2,521 | 94    | 50.83 | 34.12 | 64.06 | 96 |
|                                       |                 |      |             | 1995  | 1,707 | 833   | 2,605 | 95    | 42.37 | 20.69 | 64.67 | 98 |
| 1996                                  | 1,736           |      |             | 979   | 2,680 | 94    | 42.26 | 23.83 | 65.24 | 97    |       |    |
| 1997                                  | 1,755           |      |             | 1,115 | 2,738 | 92    | 41.93 | 26.65 | 65.43 | 97    |       |    |
| 1998                                  | 1,771           |      |             | 1,253 | 2,787 | 92    | 41.45 | 29.33 | 65.22 | 97    |       |    |
| 1999                                  | 1,913           |      |             | 1,355 | 2,822 | 92    | 43.80 | 31.03 | 64.64 | 96    |       |    |
| 2000                                  | 1,749           |      |             | 1,290 | 2,887 | 89    | 39.27 | 28.95 | 64.80 | 97    |       |    |
| 2001                                  | 1,881           |      |             | 1,319 | 2,927 | 91    | 41.49 | 29.10 | 64.56 | 96    |       |    |
| 2002                                  | 1,693           |      |             | 1,177 | 2,957 | 91    | 36.80 | 25.57 | 64.25 | 97    |       |    |
| 2003                                  | 1,659           |      |             | 1,089 | 2,972 | 93    | 35.67 | 23.41 | 63.89 | 97    |       |    |
| 2004                                  | 1,632           |      |             | 986   | 2,984 | 93    | 34.69 | 20.96 | 63.41 | 97    |       |    |
| 2005                                  | 1,607           |      |             | 893   | 2,992 | 94    | 33.75 | 18.76 | 62.84 | 97    |       |    |
| 2006                                  | 1,589           | 811  | 3,010       | 94    | 32.80 | 16.74 | 62.13 | 97    |       |       |       |    |
| 2007                                  | 1,574           | 734  | 3,031       | 93    | 31.82 | 14.83 | 61.27 | 96    |       |       |       |    |



| Metropolitan Statistical Area     | PWID Population | Year  | Number             | Min   | Max   | Rank  | Rate   | Min   | Max    | Rank  |       |    |
|-----------------------------------|-----------------|-------|--------------------|-------|-------|-------|--------|-------|--------|-------|-------|----|
| Harrisburg--Lebanon--Carlisle, PA | Total           | 1992  | 3,480              | 1,948 | 4,341 | 86    | 87.58  | 49.02 | 109.24 | 64    |       |    |
|                                   |                 | 1993  | 3,241              | 1,773 | 4,627 | 86    | 81.07  | 44.36 | 115.75 | 63    |       |    |
|                                   |                 | 1994  | 3,990              | 1,997 | 5,126 | 84    | 99.24  | 49.65 | 127.48 | 51    |       |    |
|                                   |                 | 1995  | 3,688              | 1,974 | 5,649 | 84    | 91.33  | 48.88 | 139.91 | 53    |       |    |
|                                   |                 | 1996  | 3,949              | 2,056 | 6,271 | 84    | 97.13  | 50.57 | 154.24 | 49    |       |    |
|                                   |                 | 1997  | 4,253              | 2,085 | 7,091 | 83    | 104.30 | 51.12 | 173.89 | 46    |       |    |
|                                   |                 | 1998  | 4,486              | 2,144 | 7,549 | 83    | 109.26 | 52.21 | 183.85 | 44    |       |    |
|                                   |                 | 1999  | 5,337              | 2,200 | 7,486 | 77    | 129.28 | 53.30 | 181.33 | 32    |       |    |
|                                   |                 | 2000  | 4,610              | 2,331 | 6,973 | 82    | 111.16 | 56.21 | 168.14 | 41    |       |    |
|                                   |                 | 2001  | 5,134              | 2,464 | 7,027 | 80    | 123.17 | 59.13 | 168.61 | 33    |       |    |
|                                   |                 | 2002  | 4,371              | 2,647 | 7,438 | 83    | 103.96 | 62.96 | 176.89 | 42    |       |    |
|                                   |                 | 2003  | 4,446              | 2,769 | 7,875 | 84    | 104.76 | 65.24 | 185.57 | 41    |       |    |
|                                   |                 | 2004  | 4,778              | 2,852 | 8,317 | 82    | 111.85 | 66.76 | 194.67 | 35    |       |    |
|                                   |                 | 2005  | 5,098              | 2,943 | 8,807 | 79    | 118.21 | 68.25 | 204.23 | 29    |       |    |
|                                   |                 | 2006  | 5,463              | 3,043 | 9,346 | 76    | 125.18 | 69.73 | 214.16 | 24    |       |    |
|                                   |                 | 2007  | 5,848              | 3,139 | 9,872 | 73    | 132.78 | 71.27 | 224.14 | 22    |       |    |
|                                   |                 |       | Non-Hispanic White | 1992  | 1,677 | 939   | 2,092  | 89    | 46.89  | 26.24 | 58.48 | 80 |
|                                   |                 |       |                    | 1993  | 1,561 | 854   | 2,229  | 89    | 43.54  | 23.82 | 62.16 | 78 |
|                                   |                 |       |                    | 1994  | 1,963 | 982   | 2,521  | 84    | 54.60  | 27.32 | 70.14 | 66 |
|                                   |                 |       |                    | 1995  | 1,882 | 1,007 | 2,883  | 82    | 52.31  | 28.00 | 80.14 | 66 |
| 1996                              | 2,111           |       |                    | 1,099 | 3,352 | 80    | 58.56  | 30.49 | 92.99  | 60    |       |    |
| 1997                              | 2,393           |       |                    | 1,173 | 3,989 | 76    | 66.40  | 32.55 | 110.71 | 56    |       |    |
| 1998                              | 2,655           |       |                    | 1,269 | 4,468 | 74    | 73.54  | 35.14 | 123.74 | 55    |       |    |
| 1999                              | 3,312           |       |                    | 1,365 | 4,646 | 71    | 91.58  | 37.75 | 128.45 | 35    |       |    |
| 2000                              | 2,981           |       |                    | 1,507 | 4,508 | 71    | 82.36  | 41.65 | 124.58 | 44    |       |    |
| 2001                              | 3,431           |       |                    | 1,647 | 4,696 | 66    | 94.58  | 45.40 | 129.47 | 36    |       |    |
| 2002                              | 2,991           |       |                    | 1,811 | 5,089 | 71    | 82.01  | 49.67 | 139.54 | 42    |       |    |
| 2003                              | 3,081           |       |                    | 1,919 | 5,457 | 72    | 83.99  | 52.31 | 148.78 | 40    |       |    |
| 2004                              | 3,313           |       |                    | 1,977 | 5,767 | 69    | 90.00  | 53.72 | 156.65 | 39    |       |    |
| 2005                              | 3,486           |       |                    | 2,012 | 6,022 | 68    | 94.05  | 54.30 | 162.49 | 36    |       |    |
| 2006                              | 3,618           | 2,015 | 6,189              | 66    | 96.87 | 53.96 | 165.72 | 40    |        |       |       |    |
| 2007                              | 3,664           | 1,966 | 6,185              | 66    | 97.49 | 52.33 | 164.57 | 40    |        |       |       |    |

| Metropolitan Statistical Area     | PWID Population    | Year | Number   | Min  | Max    | Rank   | Rate   | Min    | Max     | Rank   |        |   |
|-----------------------------------|--------------------|------|----------|------|--------|--------|--------|--------|---------|--------|--------|---|
| Harrisburg--Lebanon--Carlisle, PA | Non-Hispanic Black | 1992 | 1,270    | 711  | 1,584  | 66     | 471.52 | 263.89 | 588.10  | 19     |        |   |
|                                   |                    | 1993 | 1,178    | 645  | 1,682  | 67     | 425.63 | 232.89 | 607.71  | 17     |        |   |
|                                   |                    | 1994 | 1,403    | 702  | 1,802  | 64     | 496.46 | 248.39 | 637.76  | 12     |        |   |
|                                   |                    | 1995 | 1,222    | 654  | 1,872  | 64     | 423.37 | 226.60 | 648.58  | 14     |        |   |
|                                   |                    | 1996 | 1,207    | 629  | 1,917  | 64     | 405.90 | 211.35 | 644.56  | 14     |        |   |
|                                   |                    | 1997 | 1,178    | 577  | 1,964  | 64     | 390.34 | 191.33 | 650.79  | 12     |        |   |
|                                   |                    | 1998 | 1,111    | 531  | 1,870  | 64     | 356.74 | 170.47 | 600.30  | 12     |        |   |
|                                   |                    | 1999 | 1,174    | 484  | 1,647  | 64     | 369.88 | 152.49 | 518.81  | 11     |        |   |
|                                   |                    | 2000 | 901      | 456  | 1,363  | 66     | 278.67 | 140.92 | 421.53  | 19     |        |   |
|                                   |                    | 2001 | 899      | 432  | 1,231  | 65     | 274.48 | 131.75 | 375.73  | 20     |        |   |
|                                   |                    | 2002 | 698      | 423  | 1,188  | 72     | 209.44 | 126.84 | 356.37  | 34     |        |   |
|                                   |                    | 2003 | 665      | 414  | 1,178  | 74     | 195.52 | 121.77 | 346.35  | 34     |        |   |
|                                   |                    | 2004 | 694      | 414  | 1,207  | 73     | 200.89 | 119.90 | 349.66  | 32     |        |   |
|                                   |                    | 2005 | 751      | 434  | 1,297  | 72     | 213.88 | 123.48 | 369.52  | 25     |        |   |
|                                   |                    | 2006 | 860      | 479  | 1,471  | 72     | 239.27 | 133.29 | 409.34  | 17     |        |   |
|                                   |                    | 2007 | 1,041    | 559  | 1,758  | 64     | 285.03 | 152.99 | 481.15  | 15     |        |   |
|                                   |                    |      | Hispanic | 1992 | 515    | 288    | 643    | 54     | 703.46  | 393.70 | 877.39 | 3 |
|                                   |                    |      |          | 1993 | 487    | 267    | 695    | 51     | 623.71  | 341.26 | 890.52 | 4 |
|                                   |                    |      |          | 1994 | 604    | 302    | 776    | 48     | 727.86  | 364.17 | 935.02 | 3 |
|                                   |                    |      |          | 1995 | 558    | 298    | 854    | 51     | 632.11  | 338.33 | 968.36 | 4 |
| 1996                              | 593                |      |          | 309  | 941    | 51     | 619.57 | 322.61 | 983.85  | 4      |        |   |
| 1997                              | 631                |      |          | 309  | 1,052  | 51     | 617.78 | 302.81 | 1029.98 | 4      |        |   |
| 1998                              | 654                |      |          | 313  | 1,101  | 51     | 598.55 | 286.02 | 1007.18 | 5      |        |   |
| 1999                              | 763                |      |          | 315  | 1,070  | 47     | 656.83 | 270.79 | 921.29  | 4      |        |   |
| 2000                              | 645                |      |          | 326  | 976    | 54     | 522.91 | 264.43 | 790.98  | 5      |        |   |
| 2001                              | 702                |      |          | 337  | 961    | 52     | 545.64 | 261.92 | 746.93  | 4      |        |   |
| 2002                              | 585                |      |          | 354  | 995    | 55     | 431.47 | 261.31 | 734.17  | 7      |        |   |
| 2003                              | 583                |      |          | 363  | 1,033  | 56     | 409.35 | 254.95 | 725.13  | 8      |        |   |
| 2004                              | 617                |      |          | 368  | 1,074  | 56     | 411.09 | 245.36 | 715.52  | 7      |        |   |
| 2005                              | 651                |      |          | 376  | 1,125  | 56     | 413.45 | 238.70 | 714.32  | 7      |        |   |
| 2006                              | 696                |      |          | 388  | 1,191  | 56     | 415.11 | 231.25 | 710.18  | 7      |        |   |
| 2007                              | 750                | 403  | 1,267    | 54   | 427.23 | 229.31 | 721.20 | 5      |         |        |        |   |

| Metropolitan Statistical Area     | PWID Population | Year   | Number | Min   | Max   | Rank   | Rate   | Min    | Max    | Rank   |    |
|-----------------------------------|-----------------|--------|--------|-------|-------|--------|--------|--------|--------|--------|----|
| Harrisburg--Lebanon--Carlisle, PA | Male            | 1992   | 2,396  | 1,341 | 2,988 | 87     | 121.98 | 68.27  | 152.14 | 60     |    |
|                                   |                 | 1993   | 2,232  | 1,221 | 3,187 | 84     | 112.87 | 61.76  | 161.15 | 61     |    |
|                                   |                 | 1994   | 2,755  | 1,378 | 3,539 | 82     | 138.49 | 69.29  | 177.90 | 47     |    |
|                                   |                 | 1995   | 2,554  | 1,367 | 3,913 | 83     | 127.89 | 68.45  | 195.92 | 48     |    |
|                                   |                 | 1996   | 2,746  | 1,430 | 4,360 | 83     | 136.45 | 71.05  | 216.68 | 45     |    |
|                                   |                 | 1997   | 2,968  | 1,455 | 4,949 | 82     | 147.16 | 72.13  | 245.34 | 42     |    |
|                                   |                 | 1998   | 3,141  | 1,501 | 5,285 | 81     | 154.32 | 73.74  | 259.68 | 39     |    |
|                                   |                 | 1999   | 3,745  | 1,544 | 5,252 | 71     | 182.97 | 75.43  | 256.64 | 27     |    |
|                                   |                 | 2000   | 3,236  | 1,636 | 4,895 | 76     | 157.36 | 79.58  | 238.04 | 36     |    |
|                                   |                 | 2001   | 3,598  | 1,727 | 4,926 | 75     | 174.04 | 83.54  | 238.24 | 28     |    |
|                                   |                 | 2002   | 3,051  | 1,848 | 5,192 | 81     | 146.10 | 88.48  | 248.59 | 37     |    |
|                                   |                 | 2003   | 3,080  | 1,918 | 5,456 | 80     | 146.03 | 90.95  | 258.67 | 37     |    |
|                                   |                 | 2004   | 3,273  | 1,954 | 5,698 | 76     | 153.99 | 91.91  | 268.02 | 31     |    |
|                                   |                 | 2005   | 3,436  | 1,984 | 5,937 | 72     | 160.03 | 92.39  | 276.49 | 26     |    |
|                                   | 2006            | 3,602  | 2,007  | 6,163 | 71    | 165.60 | 92.25  | 283.30 | 24     |        |    |
|                                   | 2007            | 3,745  | 2,010  | 6,321 | 71    | 170.59 | 91.57  | 287.98 | 24     |        |    |
|                                   |                 | Female | 1992   | 1,210 | 677   | 1,509  | 84     | 60.19  | 33.69  | 75.08  | 63 |
|                                   |                 |        | 1993   | 1,114 | 610   | 1,591  | 84     | 55.17  | 30.19  | 78.77  | 65 |
|                                   |                 |        | 1994   | 1,355 | 678   | 1,741  | 84     | 66.70  | 33.37  | 85.69  | 58 |
|                                   |                 |        | 1995   | 1,236 | 662   | 1,894  | 85     | 60.59  | 32.43  | 92.82  | 60 |
|                                   |                 |        | 1996   | 1,307 | 681   | 2,076  | 85     | 63.65  | 33.14  | 101.07 | 55 |
|                                   |                 |        | 1997   | 1,391 | 682   | 2,319  | 83     | 67.49  | 33.08  | 112.52 | 53 |
|                                   |                 |        | 1998   | 1,452 | 694   | 2,443  | 84     | 70.12  | 33.50  | 117.98 | 52 |
|                                   |                 |        | 1999   | 1,714 | 706   | 2,404  | 82     | 82.31  | 33.93  | 115.45 | 44 |
|                                   |                 |        | 2000   | 1,473 | 745   | 2,228  | 84     | 70.47  | 35.63  | 106.59 | 51 |
|                                   |                 |        | 2001   | 1,640 | 787   | 2,244  | 83     | 78.07  | 37.47  | 106.87 | 44 |
|                                   | 2002            |        | 1,402  | 849   | 2,386 | 86     | 66.24  | 40.12  | 112.72 | 56     |    |
|                                   | 2003            |        | 1,440  | 897   | 2,551 | 85     | 67.47  | 42.02  | 119.51 | 49     |    |
|                                   | 2004            | 1,573  | 939    | 2,738 | 85    | 73.28  | 43.74  | 127.55 | 42     |        |    |
|                                   | 2005            | 1,717  | 992    | 2,967 | 82    | 79.32  | 45.79  | 137.04 | 34     |        |    |
|                                   | 2006            | 1,898  | 1,057  | 3,247 | 80    | 86.72  | 48.31  | 148.36 | 26     |        |    |
|                                   | 2007            | 2,112  | 1,134  | 3,566 | 74    | 95.62  | 51.32  | 161.41 | 21     |        |    |

| Metropolitan Statistical Area     | PWID Population | Year        | Number | Min   | Max   | Rank   | Rate   | Min    | Max    | Rank   |    |
|-----------------------------------|-----------------|-------------|--------|-------|-------|--------|--------|--------|--------|--------|----|
| Harrisburg--Lebanon--Carlisle, PA | Young (15-29)   | 1992        | 924    | 517   | 1,152 | 84     | 72.27  | 40.45  | 90.14  | 63     |    |
|                                   |                 | 1993        | 849    | 465   | 1,213 | 83     | 67.26  | 36.80  | 96.03  | 59     |    |
|                                   |                 | 1994        | 1,072  | 536   | 1,377 | 81     | 85.96  | 43.01  | 110.42 | 49     |    |
|                                   |                 | 1995        | 1,047  | 560   | 1,604 | 79     | 84.77  | 45.37  | 129.87 | 52     |    |
|                                   |                 | 1996        | 1,211  | 631   | 1,924 | 77     | 98.56  | 51.32  | 156.50 | 42     |    |
|                                   |                 | 1997        | 1,429  | 701   | 2,383 | 71     | 117.30 | 57.50  | 195.57 | 33     |    |
|                                   |                 | 1998        | 1,662  | 794   | 2,796 | 66     | 136.85 | 65.40  | 230.28 | 19     |    |
|                                   |                 | 1999        | 2,177  | 897   | 3,053 | 56     | 181.41 | 74.79  | 254.45 | 9      |    |
|                                   |                 | 2000        | 2,056  | 1,040 | 3,110 | 58     | 173.25 | 87.61  | 262.06 | 13     |    |
|                                   |                 | 2001        | 2,475  | 1,188 | 3,388 | 53     | 209.95 | 100.78 | 287.40 | 7      |    |
|                                   |                 | 2002        | 2,244  | 1,359 | 3,819 | 56     | 189.13 | 114.54 | 321.81 | 11     |    |
|                                   |                 | 2003        | 2,389  | 1,488 | 4,232 | 55     | 198.87 | 123.86 | 352.27 | 9      |    |
|                                   |                 | 2004        | 2,637  | 1,574 | 4,590 | 53     | 218.00 | 130.12 | 379.44 | 8      |    |
|                                   |                 | 2005        | 2,827  | 1,632 | 4,884 | 49     | 230.21 | 132.91 | 397.75 | 6      |    |
|                                   |                 | 2006        | 2,968  | 1,653 | 5,078 | 46     | 237.05 | 132.05 | 405.54 | 7      |    |
|                                   | 2007            | 3,017       | 1,619  | 5,093 | 46    | 237.83 | 127.66 | 401.49 | 6      |        |    |
|                                   |                 | Old (30-64) | 1992   | 2,716 | 1,520 | 3,387  | 84     | 100.74 | 56.38  | 125.65 | 64 |
|                                   |                 |             | 1993   | 2,506 | 1,371 | 3,578  | 85     | 91.63  | 50.14  | 130.83 | 64 |
|                                   |                 |             | 1994   | 3,034 | 1,518 | 3,897  | 83     | 109.37 | 54.72  | 140.50 | 54 |
|                                   |                 |             | 1995   | 2,735 | 1,464 | 4,190  | 85     | 97.59  | 52.23  | 149.50 | 58 |
|                                   |                 |             | 1996   | 2,835 | 1,476 | 4,502  | 85     | 99.93  | 52.04  | 158.69 | 55 |
|                                   | 1997            |             | 2,931  | 1,437 | 4,887 | 84     | 102.51 | 50.25  | 170.91 | 51     |    |
|                                   | 1998            |             | 2,945  | 1,407 | 4,955 | 84     | 101.83 | 48.66  | 171.36 | 52     |    |
|                                   | 1999            |             | 3,313  | 1,366 | 4,646 | 80     | 113.12 | 46.64  | 158.67 | 44     |    |
|                                   | 2000            |             | 2,690  | 1,360 | 4,069 | 86     | 90.88  | 45.96  | 137.47 | 57     |    |
|                                   | 2001            |             | 2,809  | 1,348 | 3,845 | 84     | 93.97  | 45.11  | 128.64 | 54     |    |
|                                   | 2002            | 2,243       | 1,359  | 3,817 | 87    | 74.33  | 45.01  | 126.47 | 60     |        |    |
|                                   | 2003            | 2,150       | 1,339  | 3,809 | 87    | 70.68  | 44.02  | 125.21 | 63     |        |    |
|                                   | 2004            | 2,199       | 1,312  | 3,828 | 87    | 71.80  | 42.85  | 124.97 | 61     |        |    |
|                                   | 2005            | 2,264       | 1,307  | 3,912 | 86    | 73.40  | 42.38  | 126.81 | 58     |        |    |
|                                   | 2006            | 2,387       | 1,330  | 4,084 | 86    | 76.70  | 42.73  | 131.22 | 52     |        |    |
|                                   | 2007            | 2,573       | 1,381  | 4,344 | 84    | 82.07  | 44.05  | 138.54 | 47     |        |    |

| Metropolitan Statistical Area | PWID Population | Year  | Number             | Min    | Max    | Rank  | Rate   | Min    | Max    | Rank  |       |    |
|-------------------------------|-----------------|-------|--------------------|--------|--------|-------|--------|--------|--------|-------|-------|----|
| Hartford, CT                  | Total           | 1992  | 11,278             | 10,339 | 12,839 | 41    | 150.42 | 137.90 | 171.24 | 33    |       |    |
|                               |                 | 1993  | 11,370             | 10,426 | 13,001 | 36    | 152.74 | 140.05 | 174.65 | 29    |       |    |
|                               |                 | 1994  | 11,603             | 10,546 | 13,137 | 39    | 156.47 | 142.21 | 177.15 | 27    |       |    |
|                               |                 | 1995  | 11,469             | 10,647 | 13,196 | 35    | 155.40 | 144.25 | 178.79 | 24    |       |    |
|                               |                 | 1996  | 11,433             | 10,425 | 12,726 | 33    | 154.65 | 141.02 | 172.14 | 21    |       |    |
|                               |                 | 1997  | 11,323             | 10,198 | 12,132 | 34    | 152.63 | 137.46 | 163.53 | 22    |       |    |
|                               |                 | 1998  | 11,150             | 9,970  | 12,547 | 36    | 149.75 | 133.90 | 168.51 | 22    |       |    |
|                               |                 | 1999  | 11,412             | 9,737  | 13,000 | 35    | 152.31 | 129.95 | 173.50 | 21    |       |    |
|                               |                 | 2000  | 10,957             | 8,863  | 13,544 | 38    | 144.78 | 117.11 | 178.96 | 20    |       |    |
|                               |                 | 2001  | 11,469             | 8,229  | 14,089 | 38    | 150.11 | 107.70 | 184.42 | 19    |       |    |
|                               |                 | 2002  | 10,997             | 7,799  | 14,726 | 38    | 142.19 | 100.85 | 190.42 | 19    |       |    |
|                               |                 | 2003  | 11,096             | 7,535  | 15,359 | 39    | 141.89 | 96.36  | 196.42 | 19    |       |    |
|                               |                 | 2004  | 11,134             | 7,180  | 15,963 | 39    | 141.59 | 91.31  | 203.01 | 19    |       |    |
|                               |                 | 2005  | 11,175             | 6,729  | 16,627 | 39    | 140.87 | 84.82  | 209.59 | 20    |       |    |
|                               |                 | 2006  | 11,216             | 6,279  | 17,294 | 38    | 140.17 | 78.47  | 216.13 | 20    |       |    |
|                               |                 | 2007  | 11,209             | 5,777  | 17,907 | 39    | 139.37 | 71.83  | 222.66 | 20    |       |    |
|                               |                 |       | Non-Hispanic White | 1992   | 3,706  | 3,397 | 4,218  | 61     | 60.03  | 55.04 | 68.34 | 64 |
|                               |                 |       |                    | 1993   | 3,722  | 3,413 | 4,256  | 59     | 61.21  | 56.13 | 69.99 | 58 |
|                               |                 |       |                    | 1994   | 3,805  | 3,458 | 4,307  | 60     | 63.22  | 57.46 | 71.58 | 57 |
|                               |                 |       |                    | 1995   | 3,784  | 3,512 | 4,353  | 55     | 63.52  | 58.97 | 73.08 | 57 |
| 1996                          | 3,810           |       |                    | 3,474  | 4,240  | 55    | 64.30  | 58.63  | 71.57  | 56    |       |    |
| 1997                          | 3,824           |       |                    | 3,444  | 4,097  | 55    | 64.77  | 58.33  | 69.39  | 57    |       |    |
| 1998                          | 3,827           |       |                    | 3,423  | 4,307  | 52    | 65.03  | 58.15  | 73.18  | 58    |       |    |
| 1999                          | 3,992           |       |                    | 3,406  | 4,547  | 52    | 67.86  | 57.90  | 77.31  | 59    |       |    |
| 2000                          | 3,912           |       |                    | 3,164  | 4,836  | 52    | 66.29  | 53.63  | 81.95  | 58    |       |    |
| 2001                          | 4,185           |       |                    | 3,003  | 5,142  | 55    | 70.62  | 50.67  | 86.76  | 57    |       |    |
| 2002                          | 4,106           |       |                    | 2,912  | 5,498  | 48    | 68.81  | 48.81  | 92.15  | 58    |       |    |
| 2003                          | 4,240           |       |                    | 2,879  | 5,869  | 46    | 70.69  | 48.01  | 97.86  | 56    |       |    |
| 2004                          | 4,354           |       |                    | 2,808  | 6,243  | 46    | 72.53  | 46.77  | 103.98 | 53    |       |    |
| 2005                          | 4,471           |       |                    | 2,692  | 6,652  | 48    | 74.18  | 44.66  | 110.36 | 52    |       |    |
| 2006                          | 4,585           |       |                    | 2,567  | 7,070  | 52    | 75.91  | 42.49  | 117.04 | 51    |       |    |
| 2007                          | 4,676           | 2,410 | 7,471              | 52     | 77.46  | 39.92 | 123.75 | 49     |        |       |       |    |

| Metropolitan Statistical Area | PWID Population    | Year  | Number   | Min   | Max    | Rank   | Rate   | Min    | Max    | Rank   |         |   |
|-------------------------------|--------------------|-------|----------|-------|--------|--------|--------|--------|--------|--------|---------|---|
| Hartford, CT                  | Non-Hispanic Black | 1992  | 2,145    | 1,966 | 2,442  | 53     | 332.09 | 304.45 | 378.04 | 43     |         |   |
|                               |                    | 1993  | 2,136    | 1,959 | 2,443  | 47     | 325.33 | 298.31 | 371.98 | 39     |         |   |
|                               |                    | 1994  | 2,118    | 1,925 | 2,398  | 48     | 317.89 | 288.92 | 359.92 | 40     |         |   |
|                               |                    | 1995  | 2,006    | 1,862 | 2,307  | 46     | 298.71 | 277.28 | 343.68 | 37     |         |   |
|                               |                    | 1996  | 1,896    | 1,728 | 2,110  | 48     | 277.77 | 253.29 | 309.18 | 38     |         |   |
|                               |                    | 1997  | 1,767    | 1,592 | 1,894  | 49     | 253.88 | 228.65 | 272.01 | 39     |         |   |
|                               |                    | 1998  | 1,633    | 1,460 | 1,837  | 54     | 228.77 | 204.56 | 257.44 | 43     |         |   |
|                               |                    | 1999  | 1,569    | 1,338 | 1,787  | 57     | 215.08 | 183.50 | 245.00 | 45     |         |   |
|                               |                    | 2000  | 1,420    | 1,149 | 1,755  | 57     | 190.79 | 154.33 | 235.84 | 44     |         |   |
|                               |                    | 2001  | 1,413    | 1,014 | 1,736  | 60     | 186.97 | 134.15 | 229.70 | 46     |         |   |
|                               |                    | 2002  | 1,305    | 926   | 1,748  | 60     | 169.43 | 120.17 | 226.89 | 46     |         |   |
|                               |                    | 2003  | 1,290    | 876   | 1,786  | 59     | 164.49 | 111.70 | 227.70 | 48     |         |   |
|                               |                    | 2004  | 1,297    | 836   | 1,859  | 58     | 162.84 | 105.01 | 233.46 | 44     |         |   |
|                               |                    | 2005  | 1,338    | 805   | 1,990  | 57     | 164.76 | 99.21  | 245.15 | 44     |         |   |
|                               |                    | 2006  | 1,422    | 796   | 2,193  | 55     | 171.98 | 96.27  | 265.17 | 44     |         |   |
|                               |                    | 2007  | 1,559    | 803   | 2,491  | 53     | 186.04 | 95.88  | 297.22 | 41     |         |   |
|                               |                    |       | Hispanic | 1992  | 4,958  | 4,545  | 5,644  | 16     | 946.46 | 867.68 | 1077.43 | 2 |
|                               |                    |       |          | 1993  | 4,826  | 4,425  | 5,518  | 16     | 890.50 | 816.54 | 1018.22 | 2 |
|                               |                    |       |          | 1994  | 4,856  | 4,413  | 5,498  | 15     | 865.50 | 786.63 | 979.91  | 2 |
|                               |                    |       |          | 1995  | 4,814  | 4,468  | 5,538  | 14     | 839.25 | 779.05 | 965.59  | 2 |
| 1996                          | 4,872              |       |          | 4,443 | 5,423  | 14     | 814.35 | 742.56 | 906.43 | 2      |         |   |
| 1997                          | 4,938              |       |          | 4,447 | 5,291  | 14     | 793.57 | 714.69 | 850.23 | 2      |         |   |
| 1998                          | 4,991              |       |          | 4,463 | 5,616  | 14     | 777.54 | 695.28 | 874.99 | 2      |         |   |
| 1999                          | 5,236              |       |          | 4,468 | 5,965  | 14     | 786.25 | 670.84 | 895.65 | 2      |         |   |
| 2000                          | 5,127              |       |          | 4,147 | 6,337  | 14     | 737.24 | 596.36 | 911.30 | 2      |         |   |
| 2001                          | 5,424              |       |          | 3,891 | 6,663  | 15     | 753.38 | 540.54 | 925.54 | 2      |         |   |
| 2002                          | 5,191              |       |          | 3,682 | 6,951  | 14     | 696.83 | 494.22 | 933.15 | 2      |         |   |
| 2003                          | 5,141              |       |          | 3,491 | 7,117  | 14     | 665.77 | 452.11 | 921.60 | 2      |         |   |
| 2004                          | 4,955              |       |          | 3,195 | 7,104  | 15     | 627.74 | 404.81 | 900.01 | 2      |         |   |
| 2005                          | 4,642              |       |          | 2,795 | 6,906  | 15     | 571.88 | 344.34 | 850.88 | 2      |         |   |
| 2006                          | 4,188              |       |          | 2,345 | 6,458  | 16     | 497.91 | 278.73 | 767.70 | 3      |         |   |
| 2007                          | 3,582              | 1,846 | 5,723    | 21    | 413.67 | 213.20 | 660.89 | 6      |        |        |         |   |

| Metropolitan Statistical Area | PWID Population | Year   | Number | Min    | Max    | Rank   | Rate   | Min    | Max    | Rank   |    |
|-------------------------------|-----------------|--------|--------|--------|--------|--------|--------|--------|--------|--------|----|
| Hartford, CT                  | Male            | 1992   | 8,762  | 8,033  | 9,974  | 36     | 236.51 | 216.82 | 269.23 | 22     |    |
|                               |                 | 1993   | 8,667  | 7,947  | 9,910  | 34     | 235.73 | 216.15 | 269.54 | 20     |    |
|                               |                 | 1994   | 8,701  | 7,908  | 9,851  | 36     | 237.48 | 215.84 | 268.87 | 20     |    |
|                               |                 | 1995   | 8,486  | 7,878  | 9,764  | 32     | 233.05 | 216.33 | 268.13 | 16     |    |
|                               |                 | 1996   | 8,371  | 7,633  | 9,318  | 32     | 229.55 | 209.31 | 255.50 | 15     |    |
|                               |                 | 1997   | 8,227  | 7,409  | 8,815  | 32     | 224.82 | 202.47 | 240.87 | 12     |    |
|                               |                 | 1998   | 8,060  | 7,207  | 9,070  | 34     | 219.51 | 196.29 | 247.02 | 11     |    |
|                               |                 | 1999   | 8,225  | 7,018  | 9,370  | 34     | 222.67 | 189.98 | 253.65 | 15     |    |
|                               |                 | 2000   | 7,888  | 6,381  | 9,751  | 34     | 211.38 | 170.98 | 261.28 | 14     |    |
|                               |                 | 2001   | 8,259  | 5,926  | 10,146 | 34     | 219.12 | 157.21 | 269.19 | 15     |    |
|                               |                 | 2002   | 7,929  | 5,623  | 10,618 | 34     | 207.54 | 147.19 | 277.92 | 15     |    |
|                               |                 | 2003   | 8,014  | 5,442  | 11,094 | 34     | 207.28 | 140.76 | 286.93 | 14     |    |
|                               |                 | 2004   | 8,056  | 5,195  | 11,551 | 34     | 207.08 | 133.54 | 296.90 | 14     |    |
|                               |                 | 2005   | 8,098  | 4,876  | 12,049 | 33     | 205.92 | 123.99 | 306.39 | 14     |    |
|                               |                 | 2006   | 8,133  | 4,553  | 12,540 | 34     | 205.22 | 114.88 | 316.43 | 13     |    |
|                               | 2007            | 8,123  | 4,186  | 12,977 | 35     | 203.72 | 105.00 | 325.48 | 13     |        |    |
|                               |                 | Female | 1992   | 2,634  | 2,414  | 2,998  | 59     | 69.44  | 63.66  | 79.04  | 53 |
|                               |                 |        | 1993   | 2,787  | 2,556  | 3,187  | 49     | 73.98  | 67.84  | 84.59  | 44 |
|                               |                 |        | 1994   | 2,962  | 2,692  | 3,354  | 51     | 78.96  | 71.76  | 89.39  | 45 |
|                               |                 |        | 1995   | 3,027  | 2,810  | 3,483  | 48     | 80.95  | 75.14  | 93.13  | 41 |
|                               |                 |        | 1996   | 3,098  | 2,825  | 3,449  | 47     | 82.71  | 75.42  | 92.06  | 40 |
|                               |                 |        | 1997   | 3,131  | 2,820  | 3,355  | 46     | 83.31  | 75.03  | 89.26  | 40 |
|                               |                 |        | 1998   | 3,129  | 2,798  | 3,521  | 45     | 82.91  | 74.14  | 93.30  | 41 |
|                               |                 |        | 1999   | 3,234  | 2,759  | 3,684  | 48     | 85.12  | 72.62  | 96.96  | 39 |
|                               |                 |        | 2000   | 3,120  | 2,524  | 3,856  | 44     | 81.32  | 65.78  | 100.52 | 39 |
|                               | 2001            |        | 3,267  | 2,344  | 4,014  | 45     | 84.41  | 60.56  | 103.70 | 37     |    |
|                               | 2002            | 3,122  | 2,215  | 4,181  | 46     | 79.80  | 56.59  | 106.86 | 36     |        |    |
|                               | 2003            | 3,129  | 2,125  | 4,331  | 46     | 79.15  | 53.75  | 109.57 | 36     |        |    |
|                               | 2004            | 3,109  | 2,005  | 4,457  | 46     | 78.25  | 50.46  | 112.18 | 37     |        |    |
|                               | 2005            | 3,081  | 1,855  | 4,584  | 47     | 77.01  | 46.37  | 114.58 | 38     |        |    |
|                               | 2006            | 3,046  | 1,705  | 4,697  | 49     | 75.42  | 42.22  | 116.29 | 39     |        |    |
|                               | 2007            | 2,994  | 1,543  | 4,783  | 52     | 73.82  | 38.05  | 117.94 | 38     |        |    |

| Metropolitan Statistical Area | PWID Population | Year        | Number | Min    | Max    | Rank   | Rate   | Min    | Max    | Rank   |    |
|-------------------------------|-----------------|-------------|--------|--------|--------|--------|--------|--------|--------|--------|----|
| Hartford, CT                  | Young (15-29)   | 1992        | 3,173  | 2,909  | 3,613  | 38     | 131.15 | 120.23 | 149.30 | 25     |    |
|                               |                 | 1993        | 3,042  | 2,790  | 3,479  | 36     | 130.52 | 119.68 | 149.24 | 24     |    |
|                               |                 | 1994        | 2,993  | 2,720  | 3,388  | 38     | 132.64 | 120.55 | 150.18 | 21     |    |
|                               |                 | 1995        | 2,889  | 2,682  | 3,324  | 36     | 131.84 | 122.38 | 151.69 | 22     |    |
|                               |                 | 1996        | 2,848  | 2,597  | 3,170  | 35     | 132.57 | 120.89 | 147.56 | 20     |    |
|                               |                 | 1997        | 2,822  | 2,541  | 3,023  | 35     | 133.03 | 119.80 | 142.52 | 19     |    |
|                               |                 | 1998        | 2,809  | 2,512  | 3,161  | 37     | 133.50 | 119.38 | 150.23 | 23     |    |
|                               |                 | 1999        | 2,933  | 2,503  | 3,341  | 38     | 140.55 | 119.92 | 160.10 | 19     |    |
|                               |                 | 2000        | 2,897  | 2,344  | 3,581  | 39     | 138.86 | 112.33 | 171.64 | 20     |    |
|                               |                 | 2001        | 3,141  | 2,254  | 3,859  | 39     | 149.54 | 107.29 | 183.71 | 21     |    |
|                               |                 | 2002        | 3,137  | 2,225  | 4,201  | 39     | 146.48 | 103.89 | 196.16 | 20     |    |
|                               |                 | 2003        | 3,312  | 2,249  | 4,584  | 38     | 151.29 | 102.74 | 209.42 | 20     |    |
|                               |                 | 2004        | 3,487  | 2,249  | 4,999  | 37     | 157.04 | 101.27 | 225.16 | 20     |    |
|                               |                 | 2005        | 3,679  | 2,215  | 5,474  | 36     | 162.20 | 97.66  | 241.33 | 17     |    |
|                               |                 | 2006        | 3,884  | 2,174  | 5,988  | 36     | 167.81 | 93.94  | 258.73 | 18     |    |
|                               | 2007            | 4,079       | 2,102  | 6,517  | 35     | 173.97 | 89.67  | 277.95 | 17     |        |    |
|                               |                 | Old (30-64) | 1992   | 8,179  | 7,499  | 9,311  | 39     | 161.08 | 147.67 | 183.37 | 36 |
|                               |                 |             | 1993   | 8,310  | 7,620  | 9,502  | 39     | 162.52 | 149.02 | 185.83 | 31 |
|                               |                 |             | 1994   | 8,545  | 7,766  | 9,675  | 39     | 165.62 | 150.53 | 187.52 | 31 |
|                               |                 |             | 1995   | 8,505  | 7,895  | 9,786  | 36     | 163.90 | 152.15 | 188.58 | 26 |
|                               |                 |             | 1996   | 8,526  | 7,774  | 9,490  | 35     | 162.58 | 148.25 | 180.96 | 24 |
|                               |                 |             | 1997   | 8,475  | 7,633  | 9,080  | 35     | 159.99 | 144.08 | 171.41 | 24 |
|                               |                 |             | 1998   | 8,354  | 7,470  | 9,401  | 36     | 156.38 | 139.84 | 175.98 | 23 |
|                               |                 |             | 1999   | 8,531  | 7,279  | 9,718  | 36     | 157.81 | 134.65 | 179.77 | 23 |
|                               |                 |             | 2000   | 8,141  | 6,585  | 10,062 | 36     | 148.49 | 120.12 | 183.55 | 22 |
|                               | 2001            |             | 8,428  | 6,047  | 10,354 | 37     | 152.14 | 109.16 | 186.90 | 24     |    |
|                               | 2002            | 7,948       | 5,637  | 10,643 | 35     | 142.13 | 100.81 | 190.34 | 21     |        |    |
|                               | 2003            | 7,833       | 5,319  | 10,843 | 36     | 139.12 | 94.47  | 192.57 | 21     |        |    |
|                               | 2004            | 7,611       | 4,908  | 10,912 | 35     | 134.88 | 86.98  | 193.38 | 21     |        |    |
|                               | 2005            | 7,315       | 4,404  | 10,883 | 35     | 129.13 | 77.75  | 192.13 | 21     |        |    |
|                               | 2006            | 6,927       | 3,878  | 10,680 | 34     | 121.79 | 68.18  | 187.79 | 22     |        |    |
|                               | 2007            | 6,406       | 3,302  | 10,234 | 36     | 112.42 | 57.94  | 179.61 | 24     |        |    |



| Metropolitan Statistical Area | PWID Population | Year | Number             | Min   | Max    | Rank  | Rate   | Min    | Max    | Rank   |        |    |
|-------------------------------|-----------------|------|--------------------|-------|--------|-------|--------|--------|--------|--------|--------|----|
| Honolulu, HI                  | Total           | 1992 | 5,074              | 3,839 | 6,339  | 76    | 86.76  | 65.64  | 108.41 | 66     |        |    |
|                               |                 | 1993 | 4,648              | 3,112 | 6,479  | 79    | 79.56  | 53.28  | 110.91 | 67     |        |    |
|                               |                 | 1994 | 5,268              | 3,967 | 6,651  | 77    | 89.90  | 67.69  | 113.50 | 64     |        |    |
|                               |                 | 1995 | 4,670              | 2,615 | 6,796  | 80    | 79.78  | 44.66  | 116.09 | 67     |        |    |
|                               |                 | 1996 | 4,683              | 2,381 | 6,959  | 81    | 79.98  | 40.66  | 118.85 | 64     |        |    |
|                               |                 | 1997 | 4,725              | 2,169 | 7,162  | 82    | 80.23  | 36.83  | 121.61 | 64     |        |    |
|                               |                 | 1998 | 4,756              | 1,950 | 7,353  | 81    | 80.47  | 33.00  | 124.40 | 63     |        |    |
|                               |                 | 1999 | 5,727              | 4,216 | 7,441  | 70    | 97.89  | 72.07  | 127.20 | 53     |        |    |
|                               |                 | 2000 | 4,738              | 1,465 | 7,742  | 81    | 81.26  | 25.13  | 132.79 | 61     |        |    |
|                               |                 | 2001 | 5,976              | 4,153 | 8,103  | 69    | 102.06 | 70.94  | 138.38 | 48     |        |    |
|                               |                 | 2002 | 4,948              | 1,332 | 8,627  | 79    | 83.97  | 22.61  | 146.40 | 58     |        |    |
|                               |                 | 2003 | 5,056              | 1,263 | 9,139  | 77    | 85.43  | 21.35  | 154.42 | 56     |        |    |
|                               |                 | 2004 | 5,188              | 1,201 | 9,711  | 76    | 86.96  | 20.14  | 162.77 | 55     |        |    |
|                               |                 | 2005 | 5,328              | 1,148 | 10,300 | 75    | 88.53  | 19.07  | 171.12 | 55     |        |    |
|                               |                 | 2006 | 5,455              | 1,090 | 10,884 | 77    | 90.15  | 18.01  | 179.89 | 53     |        |    |
|                               |                 | 2007 | 5,500              | 1,022 | 11,302 | 76    | 91.81  | 17.06  | 188.66 | 50     |        |    |
|                               |                 |      | Non-Hispanic White | 1992  | 2,722  | 2,059 | 3,401  | 72     | 154.57 | 116.95 | 193.13 | 18 |
|                               |                 |      |                    | 1993  | 2,493  | 1,669 | 3,475  | 72     | 145.44 | 97.39  | 202.75 | 18 |
|                               |                 |      |                    | 1994  | 2,830  | 2,131 | 3,574  | 73     | 168.07 | 126.55 | 212.20 | 13 |
|                               |                 |      |                    | 1995  | 2,515  | 1,408 | 3,661  | 74     | 153.46 | 85.92  | 223.32 | 12 |
| 1996                          | 2,529           |      |                    | 1,286 | 3,758  | 73    | 158.29 | 80.47  | 235.23 | 8      |        |    |
| 1997                          | 2,556           |      |                    | 1,173 | 3,874  | 74    | 163.38 | 75.00  | 247.65 | 6      |        |    |
| 1998                          | 2,573           |      |                    | 1,055 | 3,978  | 75    | 167.64 | 68.74  | 259.18 | 5      |        |    |
| 1999                          | 3,091           |      |                    | 2,276 | 4,017  | 73    | 208.18 | 153.26 | 270.51 | 4      |        |    |
| 2000                          | 2,544           |      |                    | 787   | 4,158  | 78    | 175.95 | 54.42  | 287.51 | 5      |        |    |
| 2001                          | 3,180           |      |                    | 2,210 | 4,311  | 68    | 217.61 | 151.24 | 295.04 | 4      |        |    |
| 2002                          | 2,597           |      |                    | 699   | 4,527  | 77    | 176.03 | 47.39  | 306.91 | 6      |        |    |
| 2003                          | 2,602           |      |                    | 650   | 4,703  | 77    | 177.32 | 44.31  | 320.53 | 7      |        |    |
| 2004                          | 2,600           |      |                    | 602   | 4,868  | 77    | 174.58 | 40.43  | 326.80 | 7      |        |    |
| 2005                          | 2,581           |      |                    | 556   | 4,989  | 80    | 170.48 | 36.73  | 329.52 | 8      |        |    |
| 2006                          | 2,531           |      |                    | 506   | 5,050  | 81    | 165.32 | 33.03  | 329.87 | 8      |        |    |
| 2007                          | 2,419           | 450  | 4,972              | 81    | 162.63 | 30.23 | 334.21 | 8      |        |        |        |    |

| Metropolitan Statistical Area | PWID Population    | Year | Number   | Min  | Max   | Rank  | Rate   | Min    | Max    | Rank  |       |    |
|-------------------------------|--------------------|------|----------|------|-------|-------|--------|--------|--------|-------|-------|----|
| Honolulu, HI                  | Non-Hispanic Black | 1992 | 320      | 242  | 400   | 98    | 159.39 | 120.60 | 199.16 | 86    |       |    |
|                               |                    | 1993 | 258      | 173  | 360   | 98    | 131.54 | 88.08  | 183.38 | 89    |       |    |
|                               |                    | 1994 | 261      | 197  | 330   | 98    | 132.21 | 99.55  | 166.93 | 91    |       |    |
|                               |                    | 1995 | 209      | 117  | 305   | 98    | 107.31 | 60.08  | 156.16 | 92    |       |    |
|                               |                    | 1996 | 193      | 98   | 287   | 98    | 101.15 | 51.42  | 150.31 | 92    |       |    |
|                               |                    | 1997 | 182      | 83   | 275   | 98    | 96.22  | 44.17  | 145.85 | 92    |       |    |
|                               |                    | 1998 | 173      | 71   | 268   | 97    | 92.95  | 38.12  | 143.71 | 89    |       |    |
|                               |                    | 1999 | 201      | 148  | 261   | 96    | 115.33 | 84.91  | 149.86 | 83    |       |    |
|                               |                    | 2000 | 163      | 50   | 266   | 97    | 92.38  | 28.57  | 150.96 | 88    |       |    |
|                               |                    | 2001 | 205      | 142  | 278   | 96    | 103.70 | 72.07  | 140.60 | 82    |       |    |
|                               |                    | 2002 | 172      | 46   | 300   | 96    | 80.64  | 21.71  | 140.59 | 88    |       |    |
|                               |                    | 2003 | 182      | 45   | 329   | 97    | 84.88  | 21.21  | 153.44 | 85    |       |    |
|                               |                    | 2004 | 196      | 46   | 368   | 97    | 90.99  | 21.07  | 170.33 | 79    |       |    |
|                               |                    | 2005 | 217      | 47   | 419   | 97    | 92.10  | 19.85  | 178.03 | 76    |       |    |
|                               |                    | 2006 | 243      | 49   | 485   | 97    | 98.37  | 19.65  | 196.29 | 73    |       |    |
|                               |                    | 2007 | 275      | 51   | 565   | 96    | 114.08 | 21.20  | 234.43 | 66    |       |    |
|                               |                    |      | Hispanic | 1992 | 200   | 151   | 250    | 68     | 53.55  | 40.52 | 66.91 | 84 |
|                               |                    |      |          | 1993 | 203   | 136   | 283    | 67     | 54.37  | 36.40 | 75.79 | 78 |
|                               |                    |      |          | 1994 | 250   | 188   | 315    | 63     | 67.03  | 50.47 | 84.63 | 74 |
|                               |                    |      |          | 1995 | 236   | 132   | 344    | 62     | 64.07  | 35.87 | 93.23 | 69 |
| 1996                          | 249                |      |          | 127  | 371   | 62    | 67.03  | 34.08  | 99.61  | 63    |       |    |
| 1997                          | 261                |      |          | 120  | 396   | 62    | 69.05  | 31.70  | 104.66 | 62    |       |    |
| 1998                          | 270                |      |          | 111  | 417   | 62    | 71.43  | 29.29  | 110.43 | 58    |       |    |
| 1999                          | 331                |      |          | 243  | 430   | 60    | 90.11  | 66.34  | 117.09 | 46    |       |    |
| 2000                          | 276                |      |          | 85   | 451   | 63    | 75.49  | 23.35  | 123.35 | 53    |       |    |
| 2001                          | 349                |      |          | 243  | 474   | 62    | 91.63  | 63.68  | 124.23 | 44    |       |    |
| 2002                          | 289                |      |          | 78   | 504   | 63    | 73.03  | 19.66  | 127.32 | 53    |       |    |
| 2003                          | 295                |      |          | 74   | 534   | 64    | 73.06  | 18.26  | 132.07 | 52    |       |    |
| 2004                          | 303                |      |          | 70   | 567   | 64    | 73.20  | 16.95  | 137.03 | 53    |       |    |
| 2005                          | 312                |      |          | 67   | 604   | 64    | 72.76  | 15.68  | 140.64 | 52    |       |    |
| 2006                          | 323                |      |          | 65   | 644   | 65    | 73.34  | 14.65  | 146.33 | 52    |       |    |
| 2007                          | 332                | 62   | 683      | 66   | 76.16 | 14.15 | 156.50 | 51     |        |       |       |    |

| Metropolitan Statistical Area | PWID Population | Year   | Number | Min   | Max   | Rank   | Rate   | Min    | Max    | Rank  |    |
|-------------------------------|-----------------|--------|--------|-------|-------|--------|--------|--------|--------|-------|----|
| Honolulu, HI                  | Male            | 1992   | 3,725  | 2,819 | 4,655 | 73     | 123.41 | 93.37  | 154.20 | 59    |    |
|                               |                 | 1993   | 3,307  | 2,215 | 4,611 | 76     | 109.87 | 73.57  | 153.17 | 64    |    |
|                               |                 | 1994   | 3,656  | 2,753 | 4,616 | 74     | 120.97 | 91.09  | 152.73 | 57    |    |
|                               |                 | 1995   | 3,181  | 1,781 | 4,629 | 80     | 105.45 | 59.04  | 153.46 | 66    |    |
|                               |                 | 1996   | 3,151  | 1,602 | 4,683 | 80     | 104.62 | 53.19  | 155.47 | 63    |    |
|                               |                 | 1997   | 3,160  | 1,450 | 4,790 | 79     | 104.60 | 48.01  | 158.54 | 60    |    |
|                               |                 | 1998   | 3,176  | 1,302 | 4,911 | 80     | 104.66 | 42.92  | 161.81 | 58    |    |
|                               |                 | 1999   | 3,835  | 2,823 | 4,983 | 68     | 127.96 | 94.21  | 166.28 | 47    |    |
|                               |                 | 2000   | 3,190  | 987   | 5,213 | 77     | 106.66 | 32.99  | 174.28 | 57    |    |
|                               |                 | 2001   | 4,052  | 2,816 | 5,494 | 67     | 134.40 | 93.41  | 182.23 | 44    |    |
|                               |                 | 2002   | 3,380  | 910   | 5,894 | 74     | 111.43 | 30.00  | 194.29 | 55    |    |
|                               |                 | 2003   | 3,478  | 869   | 6,287 | 72     | 114.80 | 28.69  | 207.52 | 52    |    |
|                               |                 | 2004   | 3,588  | 831   | 6,716 | 69     | 117.46 | 27.20  | 219.87 | 49    |    |
|                               |                 | 2005   | 3,695  | 796   | 7,142 | 67     | 119.09 | 25.66  | 230.19 | 46    |    |
|                               |                 | 2006   | 3,779  | 755   | 7,541 | 69     | 120.85 | 24.14  | 241.14 | 46    |    |
|                               | 2007            | 3,790  | 704    | 7,788 | 69    | 123.02 | 22.86  | 252.79 | 40     |       |    |
|                               |                 | Female | 1992   | 1,325 | 1,003 | 1,656  | 83     | 46.85  | 35.45  | 58.54 | 79 |
|                               |                 |        | 1993   | 1,323 | 886   | 1,845  | 81     | 46.73  | 31.29  | 65.15 | 75 |
|                               |                 |        | 1994   | 1,601 | 1,206 | 2,022  | 80     | 56.42  | 42.48  | 71.23 | 67 |
|                               |                 |        | 1995   | 1,489 | 834   | 2,167  | 81     | 52.48  | 29.38  | 76.37 | 67 |
|                               |                 |        | 1996   | 1,543 | 785   | 2,294  | 82     | 54.28  | 27.59  | 80.66 | 64 |
|                               |                 |        | 1997   | 1,589 | 729   | 2,409  | 81     | 55.40  | 25.43  | 83.97 | 64 |
|                               |                 |        | 1998   | 1,615 | 662   | 2,497  | 80     | 56.16  | 23.03  | 86.82 | 64 |
|                               |                 |        | 1999   | 1,946 | 1,432 | 2,528  | 75     | 68.19  | 50.20  | 88.60 | 54 |
|                               |                 |        | 2000   | 1,599 | 494   | 2,612  | 82     | 56.30  | 17.41  | 92.00 | 64 |
|                               | 2001            |        | 1,991  | 1,384 | 2,699 | 76     | 70.08  | 48.71  | 95.02  | 53    |    |
|                               | 2002            | 1,620  | 436    | 2,824 | 82    | 56.65  | 15.25  | 98.77  | 63     |       |    |
|                               | 2003            | 1,622  | 405    | 2,932 | 84    | 56.14  | 14.03  | 101.48 | 63     |       |    |
|                               | 2004            | 1,628  | 377    | 3,048 | 84    | 55.92  | 12.95  | 104.68 | 64     |       |    |
|                               | 2005            | 1,637  | 353    | 3,164 | 84    | 56.12  | 12.09  | 108.48 | 63     |       |    |
|                               | 2006            | 1,643  | 328    | 3,278 | 84    | 56.20  | 11.23  | 112.15 | 62     |       |    |
|                               | 2007            | 1,631  | 303    | 3,351 | 82    | 56.03  | 10.41  | 115.15 | 62     |       |    |

| Metropolitan Statistical Area | PWID Population | Year | Number      | Min   | Max   | Rank  | Rate   | Min   | Max    | Rank  |        |    |
|-------------------------------|-----------------|------|-------------|-------|-------|-------|--------|-------|--------|-------|--------|----|
| Honolulu, HI                  | Young (15-29)   | 1992 | 973         | 736   | 1,215 | 82    | 47.27  | 35.77 | 59.07  | 81    |        |    |
|                               |                 | 1993 | 828         | 554   | 1,154 | 84    | 41.15  | 27.56 | 57.37  | 82    |        |    |
|                               |                 | 1994 | 887         | 668   | 1,119 | 84    | 44.77  | 33.71 | 56.53  | 83    |        |    |
|                               |                 | 1995 | 756         | 423   | 1,100 | 87    | 38.82  | 21.73 | 56.49  | 85    |        |    |
|                               |                 | 1996 | 740         | 376   | 1,099 | 89    | 38.54  | 19.59 | 57.27  | 85    |        |    |
|                               |                 | 1997 | 740         | 340   | 1,121 | 89    | 38.76  | 17.79 | 58.75  | 88    |        |    |
|                               |                 | 1998 | 747         | 306   | 1,156 | 89    | 39.18  | 16.07 | 60.57  | 88    |        |    |
|                               |                 | 1999 | 914         | 673   | 1,188 | 88    | 48.72  | 35.87 | 63.31  | 83    |        |    |
|                               |                 | 2000 | 776         | 240   | 1,269 | 93    | 41.48  | 12.83 | 67.77  | 86    |        |    |
|                               |                 | 2001 | 1,014       | 705   | 1,374 | 88    | 54.24  | 37.70 | 73.54  | 82    |        |    |
|                               |                 | 2002 | 875         | 236   | 1,526 | 95    | 46.78  | 12.60 | 81.56  | 89    |        |    |
|                               |                 | 2003 | 938         | 234   | 1,695 | 95    | 50.42  | 12.60 | 91.14  | 88    |        |    |
|                               |                 | 2004 | 1,013       | 235   | 1,897 | 93    | 54.08  | 12.52 | 101.23 | 88    |        |    |
|                               |                 | 2005 | 1,098       | 237   | 2,123 | 91    | 57.53  | 12.40 | 111.21 | 87    |        |    |
|                               |                 | 2006 | 1,188       | 237   | 2,371 | 91    | 61.47  | 12.28 | 122.66 | 87    |        |    |
|                               |                 | 2007 | 1,265       | 235   | 2,600 | 86    | 67.28  | 12.50 | 138.26 | 79    |        |    |
|                               |                 |      | Old (30-64) | 1992  | 4,143 | 3,134 | 5,176  | 71    | 109.29 | 82.69 | 136.56 | 54 |
|                               |                 |      |             | 1993  | 3,838 | 2,570 | 5,351  | 76    | 100.19 | 67.09 | 139.67 | 58 |
|                               |                 |      |             | 1994  | 4,393 | 3,308 | 5,547  | 68    | 113.24 | 85.26 | 142.97 | 48 |
|                               |                 |      |             | 1995  | 3,926 | 2,198 | 5,714  | 74    | 100.47 | 56.25 | 146.21 | 56 |
| 1996                          | 3,962           |      |             | 2,014 | 5,888 | 74    | 100.67 | 51.18 | 149.59 | 53    |        |    |
| 1997                          | 4,015           |      |             | 1,843 | 6,085 | 71    | 100.84 | 46.29 | 152.85 | 53    |        |    |
| 1998                          | 4,049           |      |             | 1,660 | 6,259 | 71    | 101.14 | 41.47 | 156.37 | 53    |        |    |
| 1999                          | 4,872           |      |             | 3,586 | 6,330 | 64    | 122.60 | 90.26 | 159.30 | 37    |        |    |
| 2000                          | 4,016           |      |             | 1,242 | 6,563 | 68    | 101.46 | 31.38 | 165.78 | 48    |        |    |
| 2001                          | 5,031           |      |             | 3,497 | 6,821 | 59    | 126.21 | 87.72 | 171.12 | 37    |        |    |
| 2002                          | 4,122           |      |             | 1,110 | 7,186 | 66    | 102.47 | 27.59 | 178.66 | 43    |        |    |
| 2003                          | 4,147           |      |             | 1,036 | 7,496 | 65    | 102.18 | 25.53 | 184.71 | 42    |        |    |
| 2004                          | 4,166           |      |             | 965   | 7,798 | 64    | 101.78 | 23.57 | 190.52 | 40    |        |    |
| 2005                          | 4,156           |      |             | 895   | 8,033 | 63    | 101.12 | 21.79 | 195.46 | 39    |        |    |
| 2006                          | 4,089           |      |             | 817   | 8,159 | 62    | 99.30  | 19.84 | 198.15 | 36    |        |    |
| 2007                          | 3,905           | 726  | 8,025       | 62    | 95.01 | 17.66 | 195.23 | 35    |        |       |        |    |

| Metropolitan Statistical Area | PWID Population | Year  | Number             | Min    | Max    | Rank   | Rate   | Min    | Max    | Rank   |        |    |
|-------------------------------|-----------------|-------|--------------------|--------|--------|--------|--------|--------|--------|--------|--------|----|
| Houston, TX                   | Total           | 1992  | 57,770             | 50,145 | 66,832 | 3      | 240.75 | 208.98 | 278.52 | 7      |        |    |
|                               |                 | 1993  | 43,653             | 7,109  | 63,659 | 4      | 178.38 | 29.05  | 260.13 | 20     |        |    |
|                               |                 | 1994  | 53,637             | 47,037 | 60,321 | 3      | 215.07 | 188.60 | 241.87 | 11     |        |    |
|                               |                 | 1995  | 40,717             | 8,520  | 57,131 | 5      | 160.13 | 33.51  | 224.67 | 22     |        |    |
|                               |                 | 1996  | 39,285             | 9,330  | 54,112 | 6      | 151.51 | 35.98  | 208.70 | 24     |        |    |
|                               |                 | 1997  | 38,015             | 10,278 | 51,445 | 6      | 143.25 | 38.73  | 193.86 | 27     |        |    |
|                               |                 | 1998  | 36,626             | 11,292 | 49,026 | 6      | 134.53 | 41.48  | 180.08 | 29     |        |    |
|                               |                 | 1999  | 42,836             | 37,980 | 46,732 | 6      | 153.34 | 135.95 | 167.28 | 19     |        |    |
|                               |                 | 2000  | 34,406             | 13,615 | 44,421 | 6      | 120.36 | 47.63  | 155.39 | 38     |        |    |
|                               |                 | 2001  | 39,911             | 33,538 | 43,881 | 6      | 136.14 | 114.40 | 149.69 | 27     |        |    |
|                               |                 | 2002  | 34,195             | 16,884 | 48,637 | 6      | 113.46 | 56.02  | 161.38 | 38     |        |    |
|                               |                 | 2003  | 34,492             | 18,539 | 53,283 | 6      | 112.04 | 60.22  | 173.08 | 38     |        |    |
|                               |                 | 2004  | 34,942             | 20,198 | 58,670 | 6      | 111.15 | 64.25  | 186.64 | 38     |        |    |
|                               |                 | 2005  | 35,491             | 21,124 | 64,320 | 6      | 110.46 | 65.75  | 200.19 | 34     |        |    |
|                               |                 | 2006  | 36,571             | 17,781 | 71,190 | 6      | 109.99 | 53.48  | 214.10 | 32     |        |    |
|                               |                 | 2007  | 37,131             | 13,971 | 77,305 | 6      | 109.52 | 41.21  | 228.01 | 33     |        |    |
|                               |                 |       | Non-Hispanic White | 1992   | 25,378 | 22,028 | 29,359 | 3      | 189.45 | 164.45 | 219.17 | 12 |
|                               |                 |       |                    | 1993   | 18,762 | 3,056  | 27,361 | 6      | 140.00 | 22.80  | 204.15 | 20 |
|                               |                 |       |                    | 1994   | 22,499 | 19,731 | 25,303 | 4      | 167.93 | 147.27 | 188.86 | 14 |
|                               |                 |       |                    | 1995   | 16,642 | 3,482  | 23,351 | 7      | 124.32 | 26.01  | 174.43 | 22 |
| 1996                          | 15,635          |       |                    | 3,713  | 21,537 | 7      | 117.05 | 27.80  | 161.22 | 23     |        |    |
| 1997                          | 14,739          |       |                    | 3,985  | 19,946 | 7      | 110.07 | 29.76  | 148.95 | 27     |        |    |
| 1998                          | 13,856          |       |                    | 4,272  | 18,547 | 9      | 102.90 | 31.73  | 137.74 | 32     |        |    |
| 1999                          | 15,857          |       |                    | 14,060 | 17,299 | 6      | 117.20 | 103.91 | 127.86 | 23     |        |    |
| 2000                          | 12,515          |       |                    | 4,953  | 16,158 | 11     | 92.35  | 36.55  | 119.24 | 39     |        |    |
| 2001                          | 14,346          |       |                    | 12,055 | 15,773 | 8      | 104.78 | 88.05  | 115.20 | 31     |        |    |
| 2002                          | 12,229          |       |                    | 6,039  | 17,395 | 12     | 88.16  | 43.53  | 125.40 | 40     |        |    |
| 2003                          | 12,374          |       |                    | 6,651  | 19,116 | 13     | 88.65  | 47.65  | 136.94 | 38     |        |    |
| 2004                          | 12,691          |       |                    | 7,336  | 21,309 | 13     | 90.31  | 52.21  | 151.64 | 38     |        |    |
| 2005                          | 13,179          |       |                    | 7,844  | 23,885 | 12     | 93.15  | 55.44  | 168.82 | 38     |        |    |
| 2006                          | 14,029          |       |                    | 6,821  | 27,308 | 12     | 97.98  | 47.64  | 190.72 | 36     |        |    |
| 2007                          | 14,863          | 5,592 | 30,943             | 11     | 103.30 | 38.87  | 215.06 | 33     |        |        |        |    |

| Metropolitan Statistical Area | PWID Population    | Year  | Number   | Min    | Max    | Rank  | Rate   | Min    | Max    | Rank   |        |    |
|-------------------------------|--------------------|-------|----------|--------|--------|-------|--------|--------|--------|--------|--------|----|
| Houston, TX                   | Non-Hispanic Black | 1992  | 22,764   | 19,759 | 26,334 | 2     | 545.11 | 473.16 | 630.62 | 14     |        |    |
|                               |                    | 1993  | 17,631   | 2,871  | 25,711 | 5     | 414.62 | 67.52  | 604.63 | 19     |        |    |
|                               |                    | 1994  | 22,019   | 19,309 | 24,762 | 3     | 507.42 | 444.98 | 570.66 | 9      |        |    |
|                               |                    | 1995  | 16,868   | 3,530  | 23,667 | 6     | 381.11 | 79.75  | 534.74 | 17     |        |    |
|                               |                    | 1996  | 16,322   | 3,876  | 22,483 | 6     | 362.53 | 86.10  | 499.36 | 17     |        |    |
|                               |                    | 1997  | 15,759   | 4,261  | 21,327 | 7     | 343.01 | 92.74  | 464.20 | 18     |        |    |
|                               |                    | 1998  | 15,084   | 4,651  | 20,191 | 7     | 321.06 | 98.99  | 429.76 | 17     |        |    |
|                               |                    | 1999  | 17,465   | 15,485 | 19,053 | 6     | 363.46 | 322.26 | 396.51 | 12     |        |    |
|                               |                    | 2000  | 13,851   | 5,481  | 17,882 | 8     | 283.07 | 112.02 | 365.46 | 17     |        |    |
|                               |                    | 2001  | 15,837   | 13,308 | 17,412 | 6     | 316.49 | 265.95 | 347.97 | 13     |        |    |
|                               |                    | 2002  | 13,364   | 6,599  | 19,009 | 8     | 260.71 | 128.73 | 370.82 | 16     |        |    |
|                               |                    | 2003  | 13,282   | 7,139  | 20,518 | 7     | 254.11 | 136.58 | 392.55 | 17     |        |    |
|                               |                    | 2004  | 13,276   | 7,674  | 22,292 | 6     | 248.72 | 143.77 | 417.62 | 17     |        |    |
|                               |                    | 2005  | 13,342   | 7,941  | 24,179 | 5     | 244.21 | 145.35 | 442.58 | 18     |        |    |
|                               |                    | 2006  | 13,657   | 6,640  | 26,585 | 4     | 232.33 | 112.96 | 452.26 | 19     |        |    |
|                               |                    | 2007  | 13,848   | 5,210  | 28,832 | 5     | 233.45 | 87.84  | 486.04 | 23     |        |    |
|                               |                    |       | Hispanic | 1992   | 8,537  | 7,410 | 9,876  | 7      | 160.21 | 139.06 | 185.34 | 40 |
|                               |                    |       |          | 1993   | 6,023  | 981   | 8,783  | 12     | 106.81 | 17.39  | 155.76 | 54 |
|                               |                    |       |          | 1994   | 7,154  | 6,274 | 8,046  | 8      | 120.27 | 105.47 | 135.26 | 46 |
|                               |                    |       |          | 1995   | 5,408  | 1,132 | 7,588  | 13     | 86.13  | 18.02  | 120.84 | 57 |
| 1996                          | 5,320              |       |          | 1,264  | 7,328  | 13    | 80.09  | 19.02  | 110.32 | 55     |        |    |
| 1997                          | 5,342              |       |          | 1,444  | 7,230  | 13    | 75.87  | 20.51  | 102.68 | 54     |        |    |
| 1998                          | 5,403              |       |          | 1,666  | 7,233  | 12    | 72.36  | 22.31  | 96.86  | 57     |        |    |
| 1999                          | 6,672              |       |          | 5,915  | 7,278  | 12    | 84.35  | 74.78  | 92.02  | 55     |        |    |
| 2000                          | 5,658              |       |          | 2,239  | 7,304  | 13    | 67.68  | 26.78  | 87.38  | 58     |        |    |
| 2001                          | 6,893              |       |          | 5,792  | 7,579  | 8     | 78.57  | 66.02  | 86.39  | 57     |        |    |
| 2002                          | 6,140              |       |          | 3,032  | 8,734  | 11    | 66.66  | 32.91  | 94.81  | 58     |        |    |
| 2003                          | 6,344              |       |          | 3,410  | 9,800  | 11    | 66.06  | 35.51  | 102.05 | 58     |        |    |
| 2004                          | 6,454              |       |          | 3,731  | 10,836 | 11    | 64.62  | 37.36  | 108.51 | 59     |        |    |
| 2005                          | 6,423              |       |          | 3,823  | 11,641 | 11    | 61.77  | 36.76  | 111.94 | 60     |        |    |
| 2006                          | 6,295              |       |          | 3,061  | 12,255 | 11    | 58.00  | 28.20  | 112.91 | 61     |        |    |
| 2007                          | 5,868              | 2,208 | 12,217   | 12     | 51.89  | 19.53 | 108.04 | 63     |        |        |        |    |

| Metropolitan Statistical Area | PWID Population | Year   | Number | Min    | Max    | Rank   | Rate   | Min    | Max    | Rank   |    |
|-------------------------------|-----------------|--------|--------|--------|--------|--------|--------|--------|--------|--------|----|
| Houston, TX                   | Male            | 1992   | 37,638 | 32,670 | 43,542 | 4      | 312.32 | 271.09 | 361.31 | 11     |    |
|                               |                 | 1993   | 28,214 | 4,595  | 41,144 | 4      | 229.64 | 37.40  | 334.89 | 22     |    |
|                               |                 | 1994   | 34,558 | 30,305 | 38,864 | 4      | 275.74 | 241.81 | 310.10 | 13     |    |
|                               |                 | 1995   | 26,268 | 5,497  | 36,857 | 5      | 205.80 | 43.06  | 288.76 | 27     |    |
|                               |                 | 1996   | 25,478 | 6,051  | 35,094 | 5      | 195.75 | 46.49  | 269.63 | 28     |    |
|                               |                 | 1997   | 24,867 | 6,723  | 33,653 | 6      | 186.64 | 50.46  | 252.58 | 28     |    |
|                               |                 | 1998   | 24,231 | 7,471  | 32,434 | 6      | 177.31 | 54.67  | 237.34 | 31     |    |
|                               |                 | 1999   | 28,720 | 25,465 | 31,332 | 6      | 204.81 | 181.59 | 223.43 | 19     |    |
|                               |                 | 2000   | 23,412 | 9,265  | 30,226 | 6      | 163.10 | 64.54  | 210.58 | 33     |    |
|                               |                 | 2001   | 27,584 | 23,180 | 30,328 | 6      | 187.17 | 157.28 | 205.79 | 23     |    |
|                               |                 | 2002   | 24,012 | 11,856 | 34,154 | 6      | 158.21 | 78.12  | 225.03 | 33     |    |
|                               |                 | 2003   | 24,603 | 13,224 | 38,007 | 6      | 158.65 | 85.27  | 245.08 | 28     |    |
|                               |                 | 2004   | 25,302 | 14,626 | 42,484 | 6      | 159.70 | 92.31  | 268.15 | 28     |    |
|                               |                 | 2005   | 26,064 | 15,513 | 47,236 | 6      | 160.77 | 95.69  | 291.37 | 24     |    |
|                               | 2006            | 27,203 | 13,227 | 52,954 | 6      | 162.30 | 78.91  | 315.94 | 26     |        |    |
|                               | 2007            | 27,932 | 10,510 | 58,154 | 6      | 163.28 | 61.43  | 339.94 | 26     |        |    |
|                               |                 | Female | 1992   | 20,649 | 17,923 | 23,888 | 3      | 172.88 | 150.06 | 200.00 | 6  |
|                               |                 |        | 1993   | 15,747 | 2,564  | 22,964 | 3      | 129.22 | 21.04  | 188.45 | 15 |
|                               |                 |        | 1994   | 19,381 | 16,996 | 21,797 | 3      | 156.22 | 136.99 | 175.68 | 8  |
|                               |                 |        | 1995   | 14,640 | 3,063  | 20,541 | 4      | 115.60 | 24.19  | 162.20 | 17 |
|                               |                 |        | 1996   | 13,971 | 3,318  | 19,244 | 6      | 108.19 | 25.70  | 149.03 | 20 |
|                               |                 |        | 1997   | 13,301 | 3,596  | 18,000 | 6      | 100.66 | 27.22  | 136.23 | 22 |
|                               |                 |        | 1998   | 12,550 | 3,869  | 16,800 | 6      | 92.57  | 28.54  | 123.91 | 28 |
|                               |                 |        | 1999   | 14,318 | 12,695 | 15,621 | 6      | 102.91 | 91.25  | 112.27 | 22 |
|                               |                 |        | 2000   | 11,181 | 4,425  | 14,436 | 7      | 78.56  | 31.09  | 101.42 | 44 |
|                               |                 |        | 2001   | 12,577 | 10,569 | 13,828 | 8      | 86.28  | 72.50  | 94.86  | 36 |
|                               | 2002            |        | 10,429 | 5,150  | 14,834 | 11     | 69.71  | 34.42  | 99.16  | 51     |    |
|                               | 2003            |        | 10,171 | 5,467  | 15,712 | 12     | 66.57  | 35.78  | 102.84 | 52     |    |
|                               | 2004            | 9,958  | 5,757  | 16,721 | 12     | 63.87  | 36.92  | 107.24 | 54     |        |    |
|                               | 2005            | 9,783  | 5,823  | 17,730 | 12     | 61.46  | 36.58  | 111.39 | 56     |        |    |
|                               | 2006            | 9,767  | 4,749  | 19,012 | 12     | 59.23  | 28.80  | 115.30 | 58     |        |    |
|                               | 2007            | 9,634  | 3,625  | 20,059 | 11     | 57.36  | 21.58  | 119.42 | 57     |        |    |

| Metropolitan Statistical Area | PWID Population | Year   | Number      | Min    | Max    | Rank   | Rate   | Min    | Max    | Rank   |        |    |
|-------------------------------|-----------------|--------|-------------|--------|--------|--------|--------|--------|--------|--------|--------|----|
| Houston, TX                   | Young (15-29)   | 1992   | 16,802      | 14,584 | 19,438 | 3      | 202.02 | 175.35 | 233.71 | 8      |        |    |
|                               |                 | 1993   | 11,971      | 1,950  | 17,458 | 4      | 143.59 | 23.38  | 209.39 | 18     |        |    |
|                               |                 | 1994   | 14,105      | 12,369 | 15,862 | 3      | 168.27 | 147.57 | 189.24 | 13     |        |    |
|                               |                 | 1995   | 10,435      | 2,184  | 14,641 | 5      | 122.96 | 25.73  | 172.52 | 27     |        |    |
|                               |                 | 1996   | 9,962       | 2,366  | 13,723 | 5      | 115.17 | 27.35  | 158.64 | 33     |        |    |
|                               |                 | 1997   | 9,674       | 2,615  | 13,092 | 6      | 109.07 | 29.49  | 147.61 | 38     |        |    |
|                               |                 | 1998   | 9,470       | 2,920  | 12,677 | 6      | 103.76 | 31.99  | 138.89 | 38     |        |    |
|                               |                 | 1999   | 11,379      | 10,089 | 12,413 | 6      | 121.37 | 107.62 | 132.41 | 31     |        |    |
|                               |                 | 2000   | 9,476       | 3,750  | 12,234 | 7      | 99.01  | 39.18  | 127.83 | 47     |        |    |
|                               |                 | 2001   | 11,483      | 9,649  | 12,625 | 7      | 118.61 | 99.67  | 130.41 | 35     |        |    |
|                               |                 | 2002   | 10,336      | 5,104  | 14,702 | 7      | 104.74 | 51.72  | 148.98 | 44     |        |    |
|                               |                 | 2003   | 10,997      | 5,911  | 16,989 | 7      | 110.17 | 59.22  | 170.20 | 44     |        |    |
|                               |                 | 2004   | 11,777      | 6,808  | 19,775 | 7      | 116.51 | 67.35  | 195.64 | 37     |        |    |
|                               |                 | 2005   | 12,652      | 7,530  | 22,929 | 5      | 123.31 | 73.40  | 223.48 | 29     |        |    |
|                               |                 | 2006   | 13,775      | 6,697  | 26,814 | 5      | 129.71 | 63.07  | 252.50 | 28     |        |    |
|                               |                 | 2007   | 14,740      | 5,546  | 30,688 | 5      | 136.86 | 51.49  | 284.93 | 26     |        |    |
|                               |                 |        | Old (30-64) | 1992   | 40,815 | 35,428 | 47,218 | 3      | 260.33 | 225.97 | 301.17 | 11 |
|                               |                 |        |             | 1993   | 31,590 | 5,145  | 46,067 | 4      | 195.79 | 31.89  | 285.51 | 23 |
|                               |                 |        |             | 1994   | 39,438 | 34,586 | 44,353 | 4      | 238.19 | 208.88 | 267.87 | 9  |
|                               |                 |        |             | 1995   | 30,226 | 6,325  | 42,411 | 5      | 178.41 | 37.33  | 250.33 | 24 |
| 1996                          | 29,284          |        |             | 6,955  | 40,337 | 6      | 169.49 | 40.25  | 233.46 | 23     |        |    |
| 1997                          | 28,320          |        |             | 7,657  | 38,326 | 6      | 160.29 | 43.34  | 216.93 | 23     |        |    |
| 1998                          | 27,151          |        |             | 8,371  | 36,343 | 6      | 150.03 | 46.26  | 200.82 | 26     |        |    |
| 1999                          | 31,471          |        |             | 27,904 | 34,333 | 5      | 169.55 | 150.33 | 184.97 | 17     |        |    |
| 2000                          | 24,960          |        |             | 9,878  | 32,226 | 6      | 131.26 | 51.94  | 169.46 | 34     |        |    |
| 2001                          | 28,497          |        |             | 23,947 | 31,332 | 6      | 145.14 | 121.96 | 159.58 | 26     |        |    |
| 2002                          | 23,963          |        |             | 11,832 | 34,084 | 7      | 118.22 | 58.38  | 168.16 | 35     |        |    |
| 2003                          | 23,671          |        |             | 12,723 | 36,567 | 7      | 113.79 | 61.16  | 175.78 | 33     |        |    |
| 2004                          | 23,446          |        |             | 13,553 | 39,368 | 7      | 109.93 | 63.55  | 184.59 | 29     |        |    |
| 2005                          | 23,262          |        |             | 13,846 | 42,158 | 7      | 106.37 | 63.31  | 192.78 | 29     |        |    |
| 2006                          | 23,407          | 11,381 | 45,565      | 6      | 103.43 | 50.29  | 201.34 | 32     |        |        |        |    |
| 2007                          | 23,213          | 8,734  | 48,329      | 6      | 100.34 | 37.75  | 208.91 | 32     |        |        |        |    |



| Metropolitan Statistical Area | PWID Population | Year  | Number             | Min   | Max    | Rank  | Rate   | Min   | Max    | Rank  |       |    |
|-------------------------------|-----------------|-------|--------------------|-------|--------|-------|--------|-------|--------|-------|-------|----|
| Indianapolis, IN              | Total           | 1992  | 9,805              | 5,982 | 11,734 | 46    | 102.16 | 62.32 | 122.26 | 52    |       |    |
|                               |                 | 1993  | 8,698              | 5,686 | 12,026 | 45    | 89.10  | 58.25 | 123.20 | 56    |       |    |
|                               |                 | 1994  | 9,307              | 5,377 | 12,247 | 47    | 93.91  | 54.25 | 123.56 | 55    |       |    |
|                               |                 | 1995  | 8,115              | 5,055 | 12,342 | 47    | 80.67  | 50.25 | 122.70 | 65    |       |    |
|                               |                 | 1996  | 7,709              | 4,747 | 11,952 | 48    | 75.47  | 46.47 | 117.01 | 68    |       |    |
|                               |                 | 1997  | 7,246              | 4,411 | 11,358 | 56    | 70.12  | 42.69 | 109.92 | 70    |       |    |
|                               |                 | 1998  | 6,759              | 4,074 | 10,636 | 61    | 64.66  | 38.98 | 101.76 | 74    |       |    |
|                               |                 | 1999  | 7,148              | 3,737 | 10,470 | 61    | 67.45  | 35.26 | 98.80  | 76    |       |    |
|                               |                 | 2000  | 6,484              | 3,719 | 11,270 | 64    | 60.23  | 34.55 | 104.69 | 75    |       |    |
|                               |                 | 2001  | 7,532              | 3,697 | 12,591 | 56    | 68.93  | 33.83 | 115.22 | 73    |       |    |
|                               |                 | 2002  | 7,016              | 4,040 | 14,096 | 54    | 63.34  | 36.47 | 127.26 | 75    |       |    |
|                               |                 | 2003  | 7,322              | 3,964 | 15,462 | 52    | 65.28  | 35.35 | 137.86 | 73    |       |    |
|                               |                 | 2004  | 7,380              | 3,880 | 15,791 | 53    | 64.92  | 34.13 | 138.91 | 73    |       |    |
|                               |                 | 2005  | 7,036              | 3,789 | 14,486 | 54    | 61.07  | 32.89 | 125.74 | 77    |       |    |
|                               |                 | 2006  | 6,703              | 3,702 | 13,117 | 63    | 57.29  | 31.64 | 112.10 | 81    |       |    |
|                               |                 | 2007  | 6,298              | 3,595 | 11,488 | 71    | 53.09  | 30.30 | 96.83  | 91    |       |    |
|                               |                 |       | Non-Hispanic White | 1992  | 4,649  | 2,836 | 5,564  | 51    | 57.07  | 34.81 | 68.29 | 69 |
|                               |                 |       |                    | 1993  | 4,169  | 2,725 | 5,764  | 53    | 50.49  | 33.00 | 69.81 | 66 |
|                               |                 |       |                    | 1994  | 4,537  | 2,621 | 5,970  | 51    | 54.34  | 31.39 | 71.50 | 67 |
|                               |                 |       |                    | 1995  | 4,041  | 2,517 | 6,146  | 52    | 47.91  | 29.84 | 72.86 | 69 |
| 1996                          | 3,931           |       |                    | 2,420 | 6,094  | 53    | 46.10  | 28.39 | 71.48  | 73    |       |    |
| 1997                          | 3,786           |       |                    | 2,305 | 5,935  | 57    | 44.13  | 26.86 | 69.17  | 75    |       |    |
| 1998                          | 3,616           |       |                    | 2,180 | 5,691  | 56    | 41.89  | 25.25 | 65.92  | 78    |       |    |
| 1999                          | 3,908           |       |                    | 2,043 | 5,724  | 56    | 44.88  | 23.46 | 65.74  | 77    |       |    |
| 2000                          | 3,610           |       |                    | 2,070 | 6,274  | 57    | 41.02  | 23.53 | 71.30  | 79    |       |    |
| 2001                          | 4,252           |       |                    | 2,087 | 7,107  | 54    | 47.79  | 23.45 | 79.88  | 75    |       |    |
| 2002                          | 3,993           |       |                    | 2,300 | 8,023  | 52    | 44.45  | 25.60 | 89.32  | 77    |       |    |
| 2003                          | 4,175           |       |                    | 2,261 | 8,817  | 47    | 46.10  | 24.96 | 97.35  | 78    |       |    |
| 2004                          | 4,184           |       |                    | 2,200 | 8,952  | 51    | 45.79  | 24.07 | 97.97  | 81    |       |    |
| 2005                          | 3,930           |       |                    | 2,116 | 8,092  | 59    | 42.63  | 22.95 | 87.77  | 86    |       |    |
| 2006                          | 3,651           | 2,016 | 7,143              | 65    | 39.19  | 21.64 | 76.68  | 88    |        |       |       |    |
| 2007                          | 3,303           | 1,885 | 6,025              | 73    | 35.13  | 20.05 | 64.08  | 94    |        |       |       |    |

| Metropolitan Statistical Area | PWID Population    | Year | Number   | Min   | Max   | Rank  | Rate   | Min    | Max    | Rank  |        |    |
|-------------------------------|--------------------|------|----------|-------|-------|-------|--------|--------|--------|-------|--------|----|
| Indianapolis, IN              | Non-Hispanic Black | 1992 | 4,728    | 2,885 | 5,659 | 21    | 381.92 | 232.99 | 457.06 | 34    |        |    |
|                               |                    | 1993 | 4,142    | 2,707 | 5,726 | 25    | 325.81 | 212.98 | 450.49 | 38    |        |    |
|                               |                    | 1994 | 4,337    | 2,505 | 5,707 | 24    | 332.62 | 192.15 | 437.65 | 37    |        |    |
|                               |                    | 1995 | 3,669    | 2,285 | 5,580 | 26    | 274.38 | 170.91 | 417.30 | 43    |        |    |
|                               |                    | 1996 | 3,355    | 2,066 | 5,202 | 27    | 245.50 | 151.16 | 380.61 | 46    |        |    |
|                               |                    | 1997 | 3,012    | 1,834 | 4,722 | 29    | 215.74 | 131.34 | 338.17 | 48    |        |    |
|                               |                    | 1998 | 2,665    | 1,607 | 4,194 | 31    | 187.45 | 112.99 | 294.99 | 53    |        |    |
|                               |                    | 1999 | 2,657    | 1,389 | 3,892 | 29    | 184.21 | 96.30  | 269.84 | 54    |        |    |
|                               |                    | 2000 | 2,259    | 1,296 | 3,927 | 33    | 153.99 | 88.32  | 267.66 | 63    |        |    |
|                               |                    | 2001 | 2,451    | 1,203 | 4,097 | 33    | 163.58 | 80.29  | 273.45 | 60    |        |    |
|                               |                    | 2002 | 2,126    | 1,225 | 4,272 | 34    | 139.41 | 80.28  | 280.11 | 60    |        |    |
|                               |                    | 2003 | 2,066    | 1,119 | 4,363 | 33    | 132.81 | 71.91  | 280.46 | 62    |        |    |
|                               |                    | 2004 | 1,942    | 1,021 | 4,156 | 34    | 122.03 | 64.16  | 261.11 | 64    |        |    |
|                               |                    | 2005 | 1,735    | 934   | 3,572 | 40    | 106.85 | 57.54  | 220.00 | 71    |        |    |
|                               |                    | 2006 | 1,561    | 862   | 3,054 | 48    | 93.76  | 51.78  | 183.46 | 75    |        |    |
|                               |                    | 2007 | 1,401    | 800   | 2,555 | 56    | 82.33  | 46.99  | 150.17 | 80    |        |    |
|                               |                    |      | Hispanic | 1992  | 117   | 72    | 140    | 75     | 115.35 | 70.37 | 138.05 | 56 |
|                               |                    |      |          | 1993  | 106   | 70    | 147    | 76     | 92.20  | 60.27 | 127.49 | 58 |
|                               |                    |      |          | 1994  | 118   | 68    | 156    | 76     | 90.22  | 52.12 | 118.71 | 60 |
|                               |                    |      |          | 1995  | 109   | 68    | 165    | 78     | 71.88  | 44.77 | 109.32 | 62 |
| 1996                          | 110                |      |          | 68    | 171   | 77    | 63.09  | 38.85  | 97.81  | 65    |        |    |
| 1997                          | 111                |      |          | 68    | 175   | 76    | 55.32  | 33.68  | 86.72  | 72    |        |    |
| 1998                          | 113                |      |          | 68    | 178   | 75    | 48.34  | 29.14  | 76.07  | 73    |        |    |
| 1999                          | 130                |      |          | 68    | 191   | 75    | 48.60  | 25.41  | 71.19  | 74    |        |    |
| 2000                          | 130                |      |          | 74    | 225   | 74    | 42.61  | 24.44  | 74.07  | 73    |        |    |
| 2001                          | 165                |      |          | 81    | 276   | 73    | 49.92  | 24.50  | 83.44  | 68    |        |    |
| 2002                          | 169                |      |          | 98    | 340   | 72    | 47.42  | 27.31  | 95.28  | 66    |        |    |
| 2003                          | 194                |      |          | 105   | 410   | 71    | 50.77  | 27.49  | 107.20 | 64    |        |    |
| 2004                          | 215                |      |          | 113   | 459   | 71    | 52.57  | 27.64  | 112.48 | 64    |        |    |
| 2005                          | 224                |      |          | 121   | 461   | 71    | 51.27  | 27.61  | 105.56 | 64    |        |    |
| 2006                          | 232                |      |          | 128   | 455   | 69    | 49.87  | 27.54  | 97.58  | 64    |        |    |
| 2007                          | 237                | 135  | 433      | 71    | 47.89 | 27.33 | 87.35  | 65     |        |       |        |    |

| Metropolitan Statistical Area | PWID Population | Year   | Number | Min   | Max   | Rank  | Rate   | Min    | Max    | Rank  |    |
|-------------------------------|-----------------|--------|--------|-------|-------|-------|--------|--------|--------|-------|----|
| Indianapolis, IN              | Male            | 1992   | 7,086  | 4,323 | 8,481 | 41    | 150.90 | 92.06  | 180.59 | 46    |    |
|                               |                 | 1993   | 6,116  | 3,998 | 8,457 | 43    | 127.86 | 83.58  | 176.79 | 52    |    |
|                               |                 | 1994   | 6,380  | 3,686 | 8,395 | 42    | 131.25 | 75.82  | 172.70 | 52    |    |
|                               |                 | 1995   | 5,435  | 3,386 | 8,267 | 45    | 110.02 | 68.53  | 167.32 | 60    |    |
|                               |                 | 1996   | 5,059  | 3,115 | 7,844 | 48    | 100.73 | 62.02  | 156.17 | 66    |    |
|                               |                 | 1997   | 4,673  | 2,845 | 7,325 | 55    | 91.87  | 55.93  | 144.01 | 71    |    |
|                               |                 | 1998   | 4,299  | 2,591 | 6,765 | 60    | 83.42  | 50.28  | 131.28 | 75    |    |
|                               |                 | 1999   | 4,499  | 2,352 | 6,590 | 61    | 85.95  | 44.93  | 125.90 | 77    |    |
|                               |                 | 2000   | 4,053  | 2,324 | 7,044 | 62    | 76.13  | 43.66  | 132.32 | 77    |    |
|                               |                 | 2001   | 4,692  | 2,303 | 7,844 | 56    | 86.78  | 42.59  | 145.06 | 74    |    |
|                               |                 | 2002   | 4,371  | 2,517 | 8,783 | 56    | 79.69  | 45.89  | 160.11 | 73    |    |
|                               |                 | 2003   | 4,579  | 2,479 | 9,669 | 54    | 82.35  | 44.59  | 173.89 | 71    |    |
|                               |                 | 2004   | 4,647  | 2,443 | 9,943 | 54    | 82.37  | 43.31  | 176.25 | 69    |    |
|                               |                 | 2005   | 4,474  | 2,409 | 9,211 | 57    | 78.22  | 42.12  | 161.05 | 75    |    |
|                               | 2006            | 4,317  | 2,384  | 8,446 | 59    | 74.30 | 41.03  | 145.38 | 77     |       |    |
|                               | 2007            | 4,117  | 2,350  | 7,509 | 62    | 69.83 | 39.86  | 127.37 | 82     |       |    |
|                               |                 | Female | 1992   | 2,831 | 1,727 | 3,388 | 54     | 57.76  | 35.24  | 69.13 | 64 |
|                               |                 |        | 1993   | 2,660 | 1,739 | 3,678 | 53     | 53.44  | 34.93  | 73.89 | 67 |
|                               |                 |        | 1994   | 3,012 | 1,740 | 3,963 | 49     | 59.64  | 34.45  | 78.47 | 64 |
|                               |                 |        | 1995   | 2,772 | 1,726 | 4,215 | 51     | 54.15  | 33.73  | 82.36 | 65 |
|                               |                 |        | 1996   | 2,768 | 1,704 | 4,291 | 51     | 53.32  | 32.83  | 82.66 | 66 |
|                               |                 |        | 1997   | 2,721 | 1,657 | 4,266 | 52     | 51.87  | 31.58  | 81.31 | 68 |
|                               |                 |        | 1998   | 2,639 | 1,591 | 4,153 | 55     | 49.80  | 30.02  | 78.37 | 72 |
|                               |                 |        | 1999   | 2,881 | 1,506 | 4,221 | 56     | 53.73  | 28.09  | 78.70 | 69 |
|                               |                 |        | 2000   | 2,677 | 1,535 | 4,653 | 56     | 49.20  | 28.22  | 85.51 | 72 |
|                               |                 |        | 2001   | 3,157 | 1,550 | 5,278 | 47     | 57.19  | 28.07  | 95.60 | 66 |
|                               | 2002            |        | 2,956  | 1,703 | 5,940 | 49    | 52.88  | 30.45  | 106.24 | 67    |    |
|                               | 2003            |        | 3,068  | 1,661 | 6,480 | 48    | 54.26  | 29.38  | 114.58 | 65    |    |
|                               | 2004            | 3,038  | 1,597  | 6,501 | 47    | 53.05 | 27.89  | 113.51 | 68     |       |    |
|                               | 2005            | 2,805  | 1,511  | 5,776 | 53    | 48.36 | 26.04  | 99.56  | 76     |       |    |
|                               | 2006            | 2,547  | 1,407  | 4,984 | 61    | 43.24 | 23.88  | 84.60  | 84     |       |    |
|                               | 2007            | 2,237  | 1,277  | 4,081 | 71    | 37.49 | 21.40  | 68.37  | 89     |       |    |

| Metropolitan Statistical Area | PWID Population | Year  | Number      | Min   | Max    | Rank  | Rate  | Min   | Max    | Rank  |        |    |
|-------------------------------|-----------------|-------|-------------|-------|--------|-------|-------|-------|--------|-------|--------|----|
| Indianapolis, IN              | Young (15-29)   | 1992  | 2,848       | 1,738 | 3,409  | 40    | 88.53 | 54.01 | 105.95 | 53    |        |    |
|                               |                 | 1993  | 2,165       | 1,415 | 2,994  | 47    | 67.32 | 44.00 | 93.08  | 58    |        |    |
|                               |                 | 1994  | 2,074       | 1,198 | 2,730  | 49    | 64.48 | 37.25 | 84.84  | 63    |        |    |
|                               |                 | 1995  | 1,691       | 1,053 | 2,571  | 58    | 52.32 | 32.59 | 79.57  | 68    |        |    |
|                               |                 | 1996  | 1,563       | 962   | 2,423  | 66    | 47.99 | 29.55 | 74.40  | 73    |        |    |
|                               |                 | 1997  | 1,480       | 901   | 2,320  | 69    | 45.19 | 27.51 | 70.83  | 79    |        |    |
|                               |                 | 1998  | 1,431       | 863   | 2,253  | 72    | 43.55 | 26.25 | 68.53  | 82    |        |    |
|                               |                 | 1999  | 1,605       | 839   | 2,351  | 73    | 48.80 | 25.51 | 71.48  | 82    |        |    |
|                               |                 | 2000  | 1,568       | 899   | 2,725  | 74    | 47.64 | 27.32 | 82.80  | 82    |        |    |
|                               |                 | 2001  | 1,978       | 971   | 3,306  | 66    | 60.11 | 29.50 | 100.47 | 79    |        |    |
|                               |                 | 2002  | 2,005       | 1,155 | 4,029  | 64    | 60.70 | 34.96 | 121.96 | 78    |        |    |
|                               |                 | 2003  | 2,269       | 1,229 | 4,792  | 60    | 68.14 | 36.89 | 143.90 | 74    |        |    |
|                               |                 | 2004  | 2,458       | 1,293 | 5,260  | 57    | 73.04 | 38.40 | 156.29 | 74    |        |    |
|                               |                 | 2005  | 2,486       | 1,338 | 5,118  | 59    | 73.25 | 39.44 | 150.81 | 75    |        |    |
|                               |                 | 2006  | 2,469       | 1,363 | 4,830  | 62    | 71.73 | 39.61 | 140.35 | 75    |        |    |
|                               |                 | 2007  | 2,368       | 1,351 | 4,318  | 59    | 68.16 | 38.90 | 124.33 | 78    |        |    |
|                               |                 |       | Old (30-64) | 1992  | 7,165  | 4,371 | 8,575 | 48    | 112.30 | 68.51 | 134.39 | 52 |
|                               |                 |       |             | 1993  | 6,628  | 4,332 | 9,164 | 43    | 101.27 | 66.20 | 140.02 | 55 |
|                               |                 |       |             | 1994  | 7,300  | 4,217 | 9,605 | 44    | 109.05 | 63.00 | 143.49 | 55 |
|                               |                 |       |             | 1995  | 6,488  | 4,041 | 9,867 | 45    | 95.03  | 59.20 | 144.53 | 60 |
| 1996                          | 6,234           |       |             | 3,839 | 9,666  | 47    | 89.61 | 55.17 | 138.92 | 61    |        |    |
| 1997                          | 5,889           |       |             | 3,585 | 9,230  | 48    | 83.43 | 50.79 | 130.78 | 66    |        |    |
| 1998                          | 5,487           |       |             | 3,307 | 8,635  | 53    | 76.58 | 46.16 | 120.52 | 69    |        |    |
| 1999                          | 5,764           |       |             | 3,013 | 8,443  | 53    | 78.87 | 41.23 | 115.53 | 69    |        |    |
| 2000                          | 5,162           |       |             | 2,961 | 8,973  | 56    | 69.07 | 39.62 | 120.06 | 71    |        |    |
| 2001                          | 5,884           |       |             | 2,888 | 9,835  | 49    | 77.04 | 37.81 | 128.78 | 64    |        |    |
| 2002                          | 5,339           |       |             | 3,075 | 10,728 | 52    | 68.68 | 39.55 | 138.00 | 65    |        |    |
| 2003                          | 5,386           |       |             | 2,916 | 11,373 | 48    | 68.30 | 36.98 | 144.24 | 65    |        |    |
| 2004                          | 5,199           |       |             | 2,734 | 11,125 | 51    | 64.97 | 34.16 | 139.02 | 66    |        |    |
| 2005                          | 4,697           |       |             | 2,529 | 9,670  | 54    | 57.79 | 31.12 | 118.99 | 75    |        |    |
| 2006                          | 4,187           |       |             | 2,312 | 8,193  | 60    | 50.70 | 28.00 | 99.20  | 78    |        |    |
| 2007                          | 3,628           | 2,071 | 6,617       | 71    | 43.23  | 24.68 | 78.86 | 89    |        |       |        |    |

| Metropolitan Statistical Area | PWID Population | Year  | Number             | Min   | Max    | Rank  | Rate   | Min    | Max    | Rank  |        |    |
|-------------------------------|-----------------|-------|--------------------|-------|--------|-------|--------|--------|--------|-------|--------|----|
| Jacksonville, FL              | Total           | 1992  | 10,368             | 7,581 | 14,532 | 43    | 163.83 | 119.79 | 229.63 | 25    |        |    |
|                               |                 | 1993  | 7,883              | 1,894 | 13,218 | 49    | 123.37 | 29.65  | 206.87 | 39    |        |    |
|                               |                 | 1994  | 9,408              | 7,909 | 11,923 | 45    | 145.46 | 122.28 | 184.35 | 32    |        |    |
|                               |                 | 1995  | 7,312              | 2,244 | 10,785 | 54    | 111.10 | 34.10  | 163.88 | 44    |        |    |
|                               |                 | 1996  | 7,189              | 2,433 | 9,929  | 57    | 105.48 | 35.70  | 145.68 | 47    |        |    |
|                               |                 | 1997  | 7,004              | 2,584 | 9,656  | 59    | 99.91  | 36.86  | 137.74 | 48    |        |    |
|                               |                 | 1998  | 7,036              | 2,720 | 10,448 | 57    | 98.35  | 38.02  | 146.04 | 48    |        |    |
|                               |                 | 1999  | 8,563              | 6,757 | 11,487 | 48    | 117.71 | 92.89  | 157.91 | 39    |        |    |
|                               |                 | 2000  | 7,365              | 3,063 | 12,562 | 52    | 99.39  | 41.33  | 169.53 | 50    |        |    |
|                               |                 | 2001  | 8,956              | 6,133 | 13,259 | 46    | 118.08 | 80.86  | 174.80 | 38    |        |    |
|                               |                 | 2002  | 7,340              | 3,067 | 12,622 | 51    | 94.38  | 39.44  | 162.29 | 51    |        |    |
|                               |                 | 2003  | 6,882              | 3,055 | 10,735 | 55    | 86.72  | 38.49  | 135.26 | 55    |        |    |
|                               |                 | 2004  | 6,447              | 3,008 | 9,350  | 63    | 79.06  | 36.89  | 114.66 | 61    |        |    |
|                               |                 | 2005  | 5,979              | 2,956 | 10,025 | 72    | 71.64  | 35.42  | 120.10 | 67    |        |    |
|                               |                 | 2006  | 5,507              | 2,901 | 10,727 | 74    | 64.42  | 33.94  | 125.49 | 73    |        |    |
|                               |                 | 2007  | 5,003              | 2,413 | 11,362 | 80    | 57.63  | 27.79  | 130.87 | 82    |        |    |
|                               |                 |       | Non-Hispanic White | 1992  | 5,867  | 4,290 | 8,223  | 41     | 122.01 | 89.21 | 171.02 | 27 |
|                               |                 |       |                    | 1993  | 4,478  | 1,076 | 7,508  | 51     | 92.83  | 22.31 | 155.66 | 37 |
|                               |                 |       |                    | 1994  | 5,338  | 4,488 | 6,766  | 43     | 110.01 | 92.48 | 139.42 | 29 |
|                               |                 |       |                    | 1995  | 4,132  | 1,268 | 6,095  | 51     | 84.26  | 25.86 | 124.29 | 47 |
| 1996                          | 4,041           |       |                    | 1,368 | 5,581  | 49    | 80.17  | 27.14  | 110.73 | 51    |        |    |
| 1997                          | 3,916           |       |                    | 1,445 | 5,399  | 53    | 76.09  | 28.07  | 104.90 | 52    |        |    |
| 1998                          | 3,922           |       |                    | 1,516 | 5,824  | 51    | 75.09  | 29.03  | 111.50 | 54    |        |    |
| 1999                          | 4,776           |       |                    | 3,769 | 6,407  | 44    | 90.50  | 71.41  | 121.40 | 37    |        |    |
| 2000                          | 4,133           |       |                    | 1,719 | 7,049  | 49    | 77.37  | 32.17  | 131.96 | 49    |        |    |
| 2001                          | 5,091           |       |                    | 3,486 | 7,536  | 40    | 93.61  | 64.10  | 138.57 | 38    |        |    |
| 2002                          | 4,260           |       |                    | 1,780 | 7,325  | 46    | 76.87  | 32.12  | 132.19 | 51    |        |    |
| 2003                          | 4,113           |       |                    | 1,826 | 6,415  | 49    | 73.16  | 32.47  | 114.11 | 53    |        |    |
| 2004                          | 4,002           |       |                    | 1,868 | 5,805  | 55    | 69.77  | 32.56  | 101.19 | 56    |        |    |
| 2005                          | 3,887           |       |                    | 1,921 | 6,516  | 61    | 66.62  | 32.94  | 111.69 | 61    |        |    |
| 2006                          | 3,772           |       |                    | 1,988 | 7,348  | 63    | 63.64  | 33.53  | 123.96 | 64    |        |    |
| 2007                          | 3,628           | 1,750 | 8,239              | 68    | 60.70  | 29.27 | 137.85 | 64     |        |       |        |    |

| Metropolitan Statistical Area | PWID Population    | Year | Number   | Min   | Max   | Rank  | Rate   | Min    | Max    | Rank  |        |    |
|-------------------------------|--------------------|------|----------|-------|-------|-------|--------|--------|--------|-------|--------|----|
| Jacksonville, FL              | Non-Hispanic Black | 1992 | 3,247    | 2,374 | 4,551 | 32    | 269.55 | 197.09 | 377.81 | 55    |        |    |
|                               |                    | 1993 | 2,642    | 635   | 4,430 | 39    | 214.55 | 51.56  | 359.76 | 59    |        |    |
|                               |                    | 1994 | 3,301    | 2,776 | 4,184 | 29    | 261.70 | 220.01 | 331.68 | 53    |        |    |
|                               |                    | 1995 | 2,637    | 810   | 3,890 | 36    | 203.03 | 62.32  | 299.49 | 58    |        |    |
|                               |                    | 1996 | 2,623    | 888   | 3,623 | 33    | 192.64 | 65.20  | 266.05 | 59    |        |    |
|                               |                    | 1997 | 2,548    | 940   | 3,512 | 33    | 179.78 | 66.33  | 247.86 | 62    |        |    |
|                               |                    | 1998 | 2,519    | 974   | 3,741 | 32    | 172.41 | 66.66  | 256.02 | 60    |        |    |
|                               |                    | 1999 | 2,983    | 2,354 | 4,002 | 26    | 198.53 | 156.67 | 266.33 | 48    |        |    |
|                               |                    | 2000 | 2,471    | 1,027 | 4,214 | 29    | 160.26 | 66.64  | 273.36 | 57    |        |    |
|                               |                    | 2001 | 2,866    | 1,963 | 4,243 | 26    | 180.70 | 123.75 | 267.51 | 52    |        |    |
|                               |                    | 2002 | 2,223    | 929   | 3,822 | 32    | 135.78 | 56.74  | 233.50 | 65    |        |    |
|                               |                    | 2003 | 1,959    | 870   | 3,056 | 35    | 116.39 | 51.66  | 181.53 | 68    |        |    |
|                               |                    | 2004 | 1,718    | 802   | 2,492 | 42    | 98.67  | 46.04  | 143.10 | 73    |        |    |
|                               |                    | 2005 | 1,488    | 736   | 2,495 | 51    | 83.01  | 41.04  | 139.16 | 80    |        |    |
|                               |                    | 2006 | 1,282    | 675   | 2,497 | 59    | 69.29  | 36.50  | 134.97 | 89    |        |    |
|                               |                    | 2007 | 1,095    | 528   | 2,487 | 63    | 57.88  | 27.92  | 131.45 | 91    |        |    |
|                               |                    |      | Hispanic | 1992  | 213   | 156   | 299    | 67     | 123.87 | 90.57 | 173.63 | 53 |
|                               |                    |      |          | 1993  | 150   | 36    | 252    | 71     | 83.22  | 20.00 | 139.55 | 60 |
|                               |                    |      |          | 1994  | 172   | 144   | 217    | 71     | 90.34  | 75.95 | 114.50 | 59 |
|                               |                    |      |          | 1995  | 132   | 40    | 194    | 73     | 64.95  | 19.93 | 95.80  | 67 |
|                               | 1996               | 132  |          | 45    | 182   | 73    | 58.93  | 19.94  | 81.38  | 69    |        |    |
|                               | 1997               | 134  |          | 49    | 185   | 73    | 55.72  | 20.56  | 76.82  | 71    |        |    |
|                               | 1998               | 144  |          | 56    | 214   | 73    | 56.80  | 21.96  | 84.34  | 68    |        |    |
|                               | 1999               | 191  |          | 151   | 257   | 71    | 71.58  | 56.48  | 96.02  | 61    |        |    |
|                               | 2000               | 183  |          | 76    | 313   | 67    | 63.72  | 26.50  | 108.68 | 60    |        |    |
|                               | 2001               | 252  |          | 173   | 373   | 66    | 80.66  | 55.24  | 119.41 | 55    |        |    |
|                               | 2002               | 237  |          | 99    | 408   | 66    | 69.80  | 29.17  | 120.03 | 56    |        |    |
|                               | 2003               | 259  |          | 115   | 404   | 66    | 71.43  | 31.70  | 111.42 | 55    |        |    |
|                               | 2004               | 285  |          | 133   | 414   | 65    | 71.90  | 33.55  | 104.28 | 54    |        |    |
|                               | 2005               | 314  | 155      | 526   | 63    | 73.38 | 36.28  | 123.02 | 51     |       |        |    |
|                               | 2006               | 345  | 182      | 672   | 64    | 74.25 | 39.12  | 144.63 | 51     |       |        |    |
|                               | 2007               | 376  | 181      | 855   | 63    | 75.86 | 36.59  | 172.29 | 53     |       |        |    |

| Metropolitan Statistical Area | PWID Population | Year   | Number | Min   | Max   | Rank  | Rate   | Min    | Max    | Rank   |    |
|-------------------------------|-----------------|--------|--------|-------|-------|-------|--------|--------|--------|--------|----|
| Jacksonville, FL              | Male            | 1992   | 5,959  | 4,357 | 8,352 | 47    | 189.81 | 138.78 | 266.04 | 36     |    |
|                               |                 | 1993   | 4,474  | 1,075 | 7,502 | 59    | 142.19 | 34.17  | 238.43 | 45     |    |
|                               |                 | 1994   | 5,302  | 4,457 | 6,719 | 53    | 166.85 | 140.27 | 211.47 | 39     |    |
|                               |                 | 1995   | 4,110  | 1,262 | 6,063 | 65    | 127.19 | 39.04  | 187.62 | 49     |    |
|                               |                 | 1996   | 4,046  | 1,369 | 5,588 | 65    | 120.44 | 40.76  | 166.34 | 49     |    |
|                               |                 | 1997   | 3,956  | 1,460 | 5,454 | 64    | 114.36 | 42.19  | 157.66 | 53     |    |
|                               |                 | 1998   | 3,995  | 1,545 | 5,933 | 64    | 113.41 | 43.85  | 168.41 | 55     |    |
|                               |                 | 1999   | 4,892  | 3,860 | 6,562 | 54    | 137.02 | 108.12 | 183.81 | 43     |    |
|                               |                 | 2000   | 4,231  | 1,760 | 7,217 | 60    | 116.29 | 48.36  | 198.36 | 55     |    |
|                               |                 | 2001   | 5,168  | 3,539 | 7,650 | 51    | 138.76 | 95.02  | 205.42 | 40     |    |
|                               |                 | 2002   | 4,244  | 1,773 | 7,298 | 60    | 111.16 | 46.45  | 191.16 | 56     |    |
|                               |                 | 2003   | 3,975  | 1,764 | 6,199 | 64    | 102.39 | 45.44  | 159.71 | 60     |    |
|                               |                 | 2004   | 3,703  | 1,728 | 5,371 | 67    | 92.71  | 43.26  | 134.46 | 65     |    |
|                               |                 | 2005   | 3,399  | 1,680 | 5,698 | 73    | 83.08  | 41.07  | 139.28 | 68     |    |
|                               | 2006            | 3,077  | 1,621  | 5,994 | 81    | 73.49 | 38.72  | 143.15 | 80     |        |    |
|                               | 2007            | 2,727  | 1,315  | 6,193 | 85    | 64.19 | 30.96  | 145.78 | 93     |        |    |
|                               |                 | Female | 1992   | 4,468 | 3,267 | 6,263 | 37     | 140.10 | 102.44 | 196.37 | 17 |
|                               |                 |        | 1993   | 3,434 | 825   | 5,758 | 38     | 105.90 | 25.45  | 177.57 | 25 |
|                               |                 |        | 1994   | 4,116 | 3,460 | 5,216 | 38     | 125.09 | 105.17 | 158.54 | 18 |
|                               |                 |        | 1995   | 3,195 | 981   | 4,713 | 42     | 95.39  | 29.28  | 140.70 | 28 |
|                               |                 |        | 1996   | 3,126 | 1,058 | 4,317 | 46     | 90.43  | 30.61  | 124.89 | 32 |
|                               |                 |        | 1997   | 3,021 | 1,115 | 4,165 | 47     | 85.09  | 31.40  | 117.32 | 39 |
|                               |                 |        | 1998   | 3,007 | 1,162 | 4,465 | 46     | 82.81  | 32.02  | 122.97 | 42 |
|                               |                 |        | 1999   | 3,624 | 2,860 | 4,862 | 40     | 97.84  | 77.21  | 131.25 | 26 |
|                               |                 |        | 2000   | 3,091 | 1,285 | 5,272 | 46     | 81.95  | 34.08  | 139.77 | 38 |
|                               |                 |        | 2001   | 3,736 | 2,558 | 5,530 | 42     | 96.76  | 66.26  | 143.23 | 27 |
|                               | 2002            |        | 3,054  | 1,276 | 5,252 | 48    | 77.13  | 32.23  | 132.63 | 40     |    |
|                               | 2003            |        | 2,872  | 1,274 | 4,479 | 52    | 70.82  | 31.43  | 110.46 | 46     |    |
|                               | 2004            | 2,715  | 1,267  | 3,937 | 56    | 65.25 | 30.45  | 94.64  | 53     |        |    |
|                               | 2005            | 2,560  | 1,266  | 4,292 | 61    | 60.16 | 29.74  | 100.86 | 59     |        |    |
|                               | 2006            | 2,418  | 1,274  | 4,711 | 66    | 55.46 | 29.22  | 108.04 | 64     |        |    |
|                               | 2007            | 2,275  | 1,097  | 5,167 | 68    | 51.32 | 24.75  | 116.54 | 69     |        |    |

| Metropolitan Statistical Area | PWID Population | Year  | Number      | Min   | Max    | Rank  | Rate   | Min    | Max    | Rank   |        |    |
|-------------------------------|-----------------|-------|-------------|-------|--------|-------|--------|--------|--------|--------|--------|----|
| Jacksonville, FL              | Young (15-29)   | 1992  | 2,402       | 1,756 | 3,366  | 47    | 111.78 | 81.73  | 156.68 | 34     |        |    |
|                               |                 | 1993  | 1,634       | 393   | 2,740  | 59    | 77.99  | 18.74  | 130.78 | 51     |        |    |
|                               |                 | 1994  | 1,808       | 1,520 | 2,291  | 62    | 87.44  | 73.51  | 110.83 | 46     |        |    |
|                               |                 | 1995  | 1,347       | 414   | 1,987  | 72    | 65.25  | 20.03  | 96.25  | 56     |        |    |
|                               |                 | 1996  | 1,311       | 444   | 1,810  | 72    | 61.66  | 20.87  | 85.16  | 60     |        |    |
|                               |                 | 1997  | 1,299       | 479   | 1,790  | 74    | 59.80  | 22.06  | 82.45  | 65     |        |    |
|                               |                 | 1998  | 1,359       | 525   | 2,018  | 73    | 61.82  | 23.90  | 91.80  | 65     |        |    |
|                               |                 | 1999  | 1,757       | 1,386 | 2,357  | 66    | 79.51  | 62.74  | 106.66 | 57     |        |    |
|                               |                 | 2000  | 1,630       | 678   | 2,780  | 72    | 72.87  | 30.30  | 124.30 | 62     |        |    |
|                               |                 | 2001  | 2,161       | 1,480 | 3,199  | 61    | 95.61  | 65.47  | 141.54 | 48     |        |    |
|                               |                 | 2002  | 1,943       | 812   | 3,341  | 67    | 84.49  | 35.31  | 145.30 | 59     |        |    |
|                               |                 | 2003  | 2,002       | 889   | 3,123  | 67    | 86.16  | 38.24  | 134.39 | 61     |        |    |
|                               |                 | 2004  | 2,057       | 960   | 2,984  | 68    | 85.89  | 40.08  | 124.57 | 61     |        |    |
|                               |                 | 2005  | 2,082       | 1,029 | 3,490  | 69    | 85.07  | 42.05  | 142.61 | 60     |        |    |
|                               |                 | 2006  | 2,074       | 1,093 | 4,040  | 71    | 82.40  | 43.41  | 160.51 | 64     |        |    |
|                               |                 | 2007  | 2,016       | 972   | 4,579  | 69    | 78.86  | 38.03  | 179.09 | 64     |        |    |
|                               |                 |       | Old (30-64) | 1992  | 8,020  | 5,864 | 11,241 | 41     | 191.86 | 140.28 | 268.92 | 25 |
|                               |                 |       |             | 1993  | 6,274  | 1,508 | 10,520 | 45     | 146.10 | 35.11  | 244.98 | 35 |
|                               |                 |       |             | 1994  | 7,617  | 6,404 | 9,654  | 43     | 173.11 | 145.53 | 219.40 | 25 |
|                               |                 |       |             | 1995  | 5,972  | 1,833 | 8,809  | 49     | 132.21 | 40.58  | 195.03 | 38 |
| 1996                          | 5,882           |       |             | 1,991 | 8,123  | 49    | 125.40 | 42.44  | 173.18 | 40     |        |    |
| 1997                          | 5,704           |       |             | 2,105 | 7,864  | 51    | 117.90 | 43.50  | 162.54 | 42     |        |    |
| 1998                          | 5,672           |       |             | 2,193 | 8,423  | 49    | 114.46 | 44.25  | 169.97 | 43     |        |    |
| 1999                          | 6,794           |       |             | 5,361 | 9,114  | 44    | 134.15 | 105.86 | 179.96 | 33     |        |    |
| 2000                          | 5,718           |       |             | 2,378 | 9,753  | 47    | 110.52 | 45.96  | 188.52 | 42     |        |    |
| 2001                          | 6,764           |       |             | 4,632 | 10,013 | 43    | 127.02 | 86.99  | 188.04 | 35     |        |    |
| 2002                          | 5,361           |       |             | 2,240 | 9,220  | 49    | 97.87  | 40.89  | 168.30 | 48     |        |    |
| 2003                          | 4,836           |       |             | 2,147 | 7,544  | 55    | 86.16  | 38.24  | 134.39 | 54     |        |    |
| 2004                          | 4,338           |       |             | 2,024 | 6,292  | 62    | 75.33  | 35.15  | 109.25 | 59     |        |    |
| 2005                          | 3,840           |       |             | 1,898 | 6,437  | 66    | 65.08  | 32.18  | 109.11 | 64     |        |    |
| 2006                          | 3,367           | 1,774 | 6,559       | 75    | 55.83  | 29.42 | 108.76 | 73     |        |        |        |    |
| 2007                          | 2,913           | 1,405 | 6,616       | 79    | 47.56  | 22.94 | 108.02 | 82     |        |        |        |    |



| Metropolitan Statistical Area | PWID Population | Year | Number             | Min   | Max    | Rank  | Rate   | Min    | Max    | Rank   |        |   |
|-------------------------------|-----------------|------|--------------------|-------|--------|-------|--------|--------|--------|--------|--------|---|
| Jersey City, NJ               | Total           | 1992 | 8,986              | 5,939 | 13,109 | 51    | 231.62 | 153.10 | 337.90 | 13     |        |   |
|                               |                 | 1993 | 7,251              | 3,182 | 11,652 | 58    | 185.64 | 81.47  | 298.31 | 17     |        |   |
|                               |                 | 1994 | 8,192              | 6,987 | 10,201 | 54    | 208.19 | 177.57 | 259.24 | 14     |        |   |
|                               |                 | 1995 | 6,588              | 3,301 | 8,944  | 63    | 165.32 | 82.85  | 224.44 | 19     |        |   |
|                               |                 | 1996 | 6,070              | 3,402 | 7,858  | 67    | 150.09 | 84.11  | 194.31 | 25     |        |   |
|                               |                 | 1997 | 5,596              | 3,521 | 6,925  | 70    | 135.94 | 85.53  | 168.22 | 29     |        |   |
|                               |                 | 1998 | 5,245              | 3,623 | 6,070  | 72    | 125.84 | 86.94  | 145.64 | 38     |        |   |
|                               |                 | 1999 | 5,608              | 5,307 | 5,939  | 72    | 133.24 | 126.08 | 141.09 | 30     |        |   |
|                               |                 | 2000 | 5,299              | 3,864 | 7,203  | 74    | 124.70 | 90.93  | 169.52 | 33     |        |   |
|                               |                 | 2001 | 5,929              | 4,051 | 8,315  | 72    | 138.31 | 94.50  | 193.98 | 24     |        |   |
|                               |                 | 2002 | 5,336              | 3,487 | 8,496  | 75    | 125.20 | 81.81  | 199.32 | 31     |        |   |
|                               |                 | 2003 | 4,967              | 3,002 | 7,471  | 79    | 117.20 | 70.83  | 176.29 | 31     |        |   |
|                               |                 | 2004 | 4,559              | 2,589 | 5,872  | 84    | 107.99 | 61.32  | 139.09 | 39     |        |   |
|                               |                 | 2005 | 4,498              | 2,237 | 6,830  | 85    | 106.72 | 53.09  | 162.06 | 38     |        |   |
|                               |                 | 2006 | 4,547              | 1,927 | 8,188  | 84    | 108.13 | 45.82  | 194.69 | 34     |        |   |
|                               |                 | 2007 | 4,632              | 1,620 | 9,644  | 82    | 110.52 | 38.65  | 230.09 | 32     |        |   |
|                               |                 |      | Non-Hispanic White | 1992  | 4,210  | 2,782 | 6,141  | 54     | 248.49 | 164.25 | 362.51 | 3 |
|                               |                 |      |                    | 1993  | 3,226  | 1,416 | 5,184  | 64     | 194.18 | 85.22  | 312.03 | 6 |
|                               |                 |      |                    | 1994  | 3,508  | 2,992 | 4,368  | 65     | 214.49 | 182.94 | 267.09 | 3 |
|                               |                 |      |                    | 1995  | 2,749  | 1,377 | 3,731  | 71     | 169.89 | 85.14  | 230.64 | 7 |
| 1996                          | 2,494           |      |                    | 1,398 | 3,229  | 75    | 155.70 | 87.26  | 201.56 | 12     |        |   |
| 1997                          | 2,285           |      |                    | 1,438 | 2,828  | 79    | 143.44 | 90.25  | 177.50 | 12     |        |   |
| 1998                          | 2,143           |      |                    | 1,480 | 2,480  | 80    | 135.74 | 93.78  | 157.10 | 14     |        |   |
| 1999                          | 2,304           |      |                    | 2,181 | 2,440  | 81    | 147.44 | 139.52 | 156.13 | 8      |        |   |
| 2000                          | 2,196           |      |                    | 1,601 | 2,985  | 81    | 142.20 | 103.69 | 193.31 | 11     |        |   |
| 2001                          | 2,481           |      |                    | 1,695 | 3,479  | 80    | 159.23 | 108.80 | 223.33 | 8      |        |   |
| 2002                          | 2,252           |      |                    | 1,472 | 3,585  | 82    | 147.00 | 96.06  | 234.04 | 8      |        |   |
| 2003                          | 2,108           |      |                    | 1,274 | 3,171  | 85    | 139.40 | 84.24  | 209.67 | 12     |        |   |
| 2004                          | 1,938           |      |                    | 1,100 | 2,496  | 88    | 129.14 | 73.33  | 166.33 | 14     |        |   |
| 2005                          | 1,902           |      |                    | 946   | 2,889  | 89    | 127.65 | 63.50  | 193.84 | 13     |        |   |
| 2006                          | 1,899           |      |                    | 805   | 3,419  | 89    | 128.32 | 54.37  | 231.04 | 15     |        |   |
| 2007                          | 1,892           | 662  | 3,939              | 91    | 128.43 | 44.92 | 267.37 | 17     |        |        |        |   |

| Metropolitan Statistical Area | PWID Population    | Year  | Number | Min   | Max    | Rank   | Rate   | Min    | Max    | Rank |
|-------------------------------|--------------------|-------|--------|-------|--------|--------|--------|--------|--------|------|
| Jersey City, NJ               | Non-Hispanic Black | 1992  | 2,648  | 1,750 | 3,863  | 43     | 542.48 | 358.57 | 791.39 | 15   |
|                               |                    | 1993  | 2,089  | 917   | 3,357  | 51     | 425.64 | 186.79 | 683.98 | 16   |
|                               |                    | 1994  | 2,304  | 1,965 | 2,869  | 45     | 464.93 | 396.55 | 578.94 | 15   |
|                               |                    | 1995  | 1,808  | 906   | 2,455  | 52     | 360.69 | 180.75 | 489.66 | 22   |
|                               |                    | 1996  | 1,627  | 912   | 2,106  | 55     | 319.89 | 179.27 | 414.11 | 25   |
|                               |                    | 1997  | 1,466  | 923   | 1,814  | 57     | 283.84 | 178.58 | 351.25 | 28   |
|                               |                    | 1998  | 1,347  | 930   | 1,559  | 58     | 257.93 | 178.20 | 298.50 | 29   |
|                               |                    | 1999  | 1,416  | 1,340 | 1,500  | 59     | 269.49 | 255.01 | 285.35 | 21   |
|                               |                    | 2000  | 1,322  | 964   | 1,797  | 59     | 250.29 | 182.52 | 340.25 | 24   |
|                               |                    | 2001  | 1,470  | 1,004 | 2,062  | 57     | 278.51 | 190.29 | 390.61 | 18   |
|                               |                    | 2002  | 1,323  | 865   | 2,107  | 59     | 252.21 | 164.81 | 401.53 | 20   |
|                               |                    | 2003  | 1,242  | 750   | 1,867  | 61     | 238.49 | 144.13 | 358.72 | 20   |
|                               |                    | 2004  | 1,159  | 658   | 1,493  | 62     | 222.50 | 126.34 | 286.57 | 22   |
|                               |                    | 2005  | 1,174  | 584   | 1,782  | 63     | 224.83 | 111.84 | 341.41 | 22   |
|                               |                    | 2006  | 1,231  | 522   | 2,217  | 61     | 236.19 | 100.08 | 425.28 | 18   |
|                               | 2007               | 1,316 | 460    | 2,740 | 58     | 253.73 | 88.74  | 528.23 | 18     |      |
|                               | Hispanic           | 1992  | 2,268  | 1,499 | 3,309  | 29     | 163.85 | 108.30 | 239.03 | 39   |
|                               |                    | 1993  | 1,874  | 822   | 3,011  | 33     | 131.84 | 57.86  | 211.86 | 42   |
|                               |                    | 1994  | 2,181  | 1,860 | 2,716  | 33     | 149.92 | 127.87 | 186.68 | 36   |
|                               |                    | 1995  | 1,814  | 909   | 2,462  | 34     | 121.12 | 60.70  | 164.43 | 42   |
|                               |                    | 1996  | 1,733  | 971   | 2,244  | 34     | 112.22 | 62.89  | 145.27 | 43   |
| 1997                          |                    | 1,660 | 1,045  | 2,054 | 34     | 104.05 | 65.46  | 128.76 | 43     |      |
| 1998                          |                    | 1,617 | 1,117  | 1,871 | 37     | 98.78  | 68.24  | 114.32 | 43     |      |
| 1999                          |                    | 1,794 | 1,698  | 1,900 | 37     | 107.63 | 101.85 | 113.97 | 39     |      |
| 2000                          |                    | 1,757 | 1,281  | 2,388 | 36     | 103.21 | 75.26  | 140.30 | 40     |      |
| 2001                          |                    | 2,031 | 1,388  | 2,849 | 35     | 118.58 | 81.02  | 166.31 | 35     |      |
| 2002                          |                    | 1,883 | 1,230  | 2,998 | 35     | 109.93 | 71.84  | 175.02 | 36     |      |
| 2003                          |                    | 1,797 | 1,086  | 2,704 | 36     | 105.13 | 63.53  | 158.13 | 38     |      |
| 2004                          |                    | 1,684 | 956    | 2,169 | 37     | 98.96  | 56.19  | 127.46 | 40     |      |
| 2005                          |                    | 1,687 | 839    | 2,562 | 37     | 99.51  | 49.50  | 151.11 | 39     |      |
| 2006                          |                    | 1,722 | 729    | 3,100 | 37     | 102.02 | 43.23  | 183.70 | 38     |      |
| 2007                          | 1,759              | 615   | 3,661  | 38    | 104.84 | 36.67  | 218.26 | 34     |        |      |

| Metropolitan Statistical Area | PWID Population | Year   | Number | Min   | Max   | Rank   | Rate   | Min    | Max    | Rank   |    |
|-------------------------------|-----------------|--------|--------|-------|-------|--------|--------|--------|--------|--------|----|
| Jersey City, NJ               | Male            | 1992   | 6,127  | 4,050 | 8,938 | 45     | 316.50 | 209.20 | 461.72 | 8      |    |
|                               |                 | 1993   | 4,887  | 2,145 | 7,853 | 49     | 250.55 | 109.95 | 402.62 | 17     |    |
|                               |                 | 1994   | 5,512  | 4,701 | 6,864 | 49     | 280.16 | 238.95 | 348.86 | 11     |    |
|                               |                 | 1995   | 4,461  | 2,236 | 6,056 | 59     | 223.56 | 112.03 | 303.50 | 18     |    |
|                               |                 | 1996   | 4,162  | 2,332 | 5,388 | 64     | 205.45 | 115.13 | 265.96 | 24     |    |
|                               |                 | 1997   | 3,900  | 2,454 | 4,827 | 66     | 189.01 | 118.92 | 233.89 | 27     |    |
|                               |                 | 1998   | 3,721  | 2,571 | 4,307 | 66     | 178.03 | 123.00 | 206.04 | 29     |    |
|                               |                 | 1999   | 4,051  | 3,833 | 4,289 | 66     | 191.53 | 181.24 | 202.81 | 23     |    |
|                               |                 | 2000   | 3,888  | 2,835 | 5,286 | 65     | 181.99 | 132.71 | 247.40 | 25     |    |
|                               |                 | 2001   | 4,406  | 3,011 | 6,180 | 62     | 204.21 | 139.53 | 286.40 | 17     |    |
|                               |                 | 2002   | 3,999  | 2,613 | 6,367 | 64     | 186.14 | 121.64 | 296.35 | 20     |    |
|                               |                 | 2003   | 3,733  | 2,256 | 5,615 | 68     | 174.53 | 105.48 | 262.52 | 22     |    |
|                               |                 | 2004   | 3,413  | 1,938 | 4,396 | 74     | 160.03 | 90.87  | 206.11 | 27     |    |
|                               |                 | 2005   | 3,325  | 1,654 | 5,050 | 77     | 155.95 | 77.58  | 236.81 | 28     |    |
|                               | 2006            | 3,284  | 1,391  | 5,912 | 75    | 154.08 | 65.29  | 277.43 | 28     |        |    |
|                               | 2007            | 3,218  | 1,125  | 6,700 | 76    | 151.34 | 52.93  | 315.06 | 29     |        |    |
|                               |                 | Female | 1992   | 2,875 | 1,900 | 4,194  | 53     | 147.93 | 97.78  | 215.80 | 12 |
|                               |                 |        | 1993   | 2,392 | 1,050 | 3,843  | 60     | 122.31 | 53.68  | 196.55 | 20 |
|                               |                 |        | 1994   | 2,727 | 2,326 | 3,395  | 58     | 138.57 | 118.19 | 172.55 | 13 |
|                               |                 |        | 1995   | 2,174 | 1,090 | 2,952  | 66     | 109.30 | 54.78  | 148.39 | 21 |
|                               |                 |        | 1996   | 1,960 | 1,098 | 2,538  | 72     | 97.13  | 54.43  | 125.74 | 27 |
|                               |                 |        | 1997   | 1,751 | 1,102 | 2,167  | 77     | 85.28  | 53.65  | 105.53 | 37 |
|                               |                 |        | 1998   | 1,580 | 1,092 | 1,828  | 82     | 76.05  | 52.54  | 88.02  | 47 |
|                               |                 |        | 1999   | 1,623 | 1,536 | 1,719  | 83     | 77.50  | 73.34  | 82.07  | 47 |
|                               |                 |        | 2000   | 1,476 | 1,076 | 2,006  | 83     | 69.86  | 50.94  | 94.97  | 52 |
|                               |                 |        | 2001   | 1,599 | 1,093 | 2,243  | 84     | 75.13  | 51.33  | 105.36 | 49 |
|                               | 2002            |        | 1,409  | 921   | 2,244 | 85     | 66.67  | 43.57  | 106.14 | 54     |    |
|                               | 2003            |        | 1,304  | 788   | 1,962 | 87     | 62.13  | 37.55  | 93.45  | 60     |    |
|                               | 2004            | 1,214  | 689    | 1,564 | 89    | 58.12  | 33.00  | 74.85  | 60     |        |    |
|                               | 2005            | 1,244  | 619    | 1,889 | 89    | 59.74  | 29.72  | 90.72  | 60     |        |    |
|                               | 2006            | 1,342  | 569    | 2,417 | 88    | 64.70  | 27.42  | 116.50 | 53     |        |    |
|                               | 2007            | 1,502  | 525    | 3,127 | 86    | 72.75  | 25.44  | 151.45 | 40     |        |    |

| Metropolitan Statistical Area | PWID Population | Year  | Number      | Min   | Max   | Rank   | Rate   | Min    | Max    | Rank   |        |    |
|-------------------------------|-----------------|-------|-------------|-------|-------|--------|--------|--------|--------|--------|--------|----|
| Jersey City, NJ               | Young (15-29)   | 1992  | 2,427       | 1,604 | 3,541 | 46     | 172.41 | 113.96 | 251.51 | 12     |        |    |
|                               |                 | 1993  | 2,081       | 913   | 3,343 | 48     | 148.87 | 65.33  | 239.22 | 15     |        |    |
|                               |                 | 1994  | 2,446       | 2,086 | 3,045 | 42     | 176.06 | 150.17 | 219.24 | 11     |        |    |
|                               |                 | 1995  | 2,010       | 1,007 | 2,729 | 49     | 144.48 | 72.40  | 196.14 | 15     |        |    |
|                               |                 | 1996  | 1,864       | 1,045 | 2,414 | 56     | 133.06 | 74.57  | 172.25 | 19     |        |    |
|                               |                 | 1997  | 1,709       | 1,075 | 2,115 | 63     | 120.22 | 75.64  | 148.77 | 28     |        |    |
|                               |                 | 1998  | 1,575       | 1,088 | 1,823 | 68     | 109.40 | 75.58  | 126.61 | 36     |        |    |
|                               |                 | 1999  | 1,642       | 1,554 | 1,738 | 71     | 112.92 | 106.85 | 119.56 | 35     |        |    |
|                               |                 | 2000  | 1,502       | 1,095 | 2,042 | 77     | 102.63 | 74.84  | 139.52 | 44     |        |    |
|                               |                 | 2001  | 1,620       | 1,107 | 2,273 | 79     | 113.05 | 77.24  | 158.56 | 37     |        |    |
|                               |                 | 2002  | 1,403       | 917   | 2,233 | 83     | 101.55 | 66.36  | 161.68 | 46     |        |    |
|                               |                 | 2003  | 1,256       | 759   | 1,889 | 87     | 94.09  | 56.86  | 141.52 | 52     |        |    |
|                               |                 | 2004  | 1,112       | 632   | 1,432 | 91     | 86.05  | 48.86  | 110.84 | 60     |        |    |
|                               |                 | 2005  | 1,064       | 529   | 1,616 | 92     | 84.48  | 42.03  | 128.29 | 62     |        |    |
|                               |                 | 2006  | 1,052       | 446   | 1,895 | 92     | 85.62  | 36.28  | 154.16 | 59     |        |    |
|                               |                 | 2007  | 1,060       | 371   | 2,207 | 95     | 88.53  | 30.96  | 184.29 | 53     |        |    |
|                               |                 |       | Old (30-64) | 1992  | 6,640 | 4,389  | 9,687  | 49     | 268.65 | 177.57 | 391.91 | 7  |
|                               |                 |       |             | 1993  | 5,230 | 2,295  | 8,405  | 60     | 208.52 | 91.51  | 335.08 | 19 |
|                               |                 |       |             | 1994  | 5,813 | 4,958  | 7,239  | 57     | 228.32 | 194.74 | 284.31 | 13 |
|                               |                 |       |             | 1995  | 4,634 | 2,322  | 6,291  | 64     | 178.66 | 89.53  | 242.55 | 23 |
|                               | 1996            | 4,262 |             | 2,388 | 5,517 | 68     | 161.27 | 90.38  | 208.77 | 25     |        |    |
|                               | 1997            | 3,946 |             | 2,483 | 4,883 | 73     | 146.38 | 92.10  | 181.15 | 31     |        |    |
|                               | 1998            | 3,730 |             | 2,577 | 4,317 | 75     | 136.73 | 94.47  | 158.24 | 33     |        |    |
|                               | 1999            | 4,037 |             | 3,820 | 4,275 | 73     | 146.53 | 138.66 | 155.16 | 28     |        |    |
|                               | 2000            | 3,868 |             | 2,820 | 5,258 | 72     | 138.85 | 101.25 | 188.75 | 25     |        |    |
|                               | 2001            | 4,392 |             | 3,001 | 6,159 | 71     | 153.92 | 105.17 | 215.87 | 22     |        |    |
|                               | 2002            | 4,011 |             | 2,621 | 6,386 | 67     | 139.22 | 90.98  | 221.65 | 25     |        |    |
|                               | 2003            | 3,784 |             | 2,287 | 5,692 | 73     | 130.37 | 78.79  | 196.09 | 26     |        |    |
|                               | 2004            | 3,516 |             | 1,997 | 4,529 | 76     | 120.03 | 68.15  | 154.59 | 28     |        |    |
|                               | 2005            | 3,503 | 1,742       | 5,319 | 75    | 118.54 | 58.97  | 180.01 | 28     |        |        |    |
|                               | 2006            | 3,565 | 1,511       | 6,419 | 72    | 119.77 | 50.75  | 215.66 | 24     |        |        |    |
|                               | 2007            | 3,641 | 1,273       | 7,579 | 69    | 121.60 | 42.53  | 253.16 | 18     |        |        |    |

| Metropolitan Statistical Area | PWID Population | Year  | Number             | Min   | Max    | Rank  | Rate  | Min   | Max    | Rank  |       |    |
|-------------------------------|-----------------|-------|--------------------|-------|--------|-------|-------|-------|--------|-------|-------|----|
| Kansas City, MO--KS           | Total           | 1992  | 8,461              | 4,627 | 11,516 | 54    | 79.50 | 43.48 | 108.22 | 71    |       |    |
|                               |                 | 1993  | 7,503              | 4,884 | 11,282 | 54    | 69.64 | 45.33 | 104.72 | 78    |       |    |
|                               |                 | 1994  | 8,262              | 5,543 | 11,056 | 53    | 75.66 | 50.76 | 101.24 | 77    |       |    |
|                               |                 | 1995  | 7,276              | 4,701 | 10,816 | 55    | 65.83 | 42.53 | 97.86  | 79    |       |    |
|                               |                 | 1996  | 7,169              | 4,614 | 10,611 | 58    | 63.90 | 41.13 | 94.59  | 79    |       |    |
|                               |                 | 1997  | 7,058              | 4,517 | 10,410 | 58    | 61.99 | 39.68 | 91.43  | 79    |       |    |
|                               |                 | 1998  | 6,749              | 4,406 | 10,187 | 63    | 58.55 | 38.22 | 88.37  | 82    |       |    |
|                               |                 | 1999  | 7,153              | 5,516 | 9,976  | 59    | 61.25 | 47.23 | 85.42  | 79    |       |    |
|                               |                 | 2000  | 6,268              | 4,178 | 9,783  | 66    | 52.89 | 35.26 | 82.56  | 86    |       |    |
|                               |                 | 2001  | 6,769              | 4,278 | 9,590  | 65    | 56.33 | 35.60 | 79.80  | 88    |       |    |
|                               |                 | 2002  | 6,219              | 3,891 | 9,406  | 65    | 51.00 | 31.91 | 77.14  | 91    |       |    |
|                               |                 | 2003  | 6,328              | 3,723 | 9,183  | 64    | 51.38 | 30.23 | 74.56  | 91    |       |    |
|                               |                 | 2004  | 6,527              | 3,551 | 8,975  | 59    | 52.41 | 28.52 | 72.07  | 92    |       |    |
|                               |                 | 2005  | 6,734              | 3,370 | 9,553  | 57    | 53.45 | 26.74 | 75.82  | 94    |       |    |
|                               |                 | 2006  | 6,967              | 3,184 | 10,473 | 57    | 54.64 | 24.97 | 82.13  | 90    |       |    |
|                               |                 | 2007  | 7,203              | 2,988 | 11,413 | 57    | 55.82 | 23.16 | 88.44  | 86    |       |    |
|                               |                 |       | Non-Hispanic White | 1992  | 6,028  | 3,297 | 8,205 | 38    | 68.31  | 37.36 | 92.98 | 55 |
|                               |                 |       |                    | 1993  | 5,387  | 3,506 | 8,100 | 40    | 60.55  | 39.41 | 91.05 | 59 |
|                               |                 |       |                    | 1994  | 5,956  | 3,996 | 7,971 | 38    | 66.35  | 44.52 | 88.79 | 56 |
|                               |                 |       |                    | 1995  | 5,248  | 3,391 | 7,802 | 38    | 58.04  | 37.49 | 86.28 | 60 |
| 1996                          | 5,155           |       |                    | 3,318 | 7,630  | 37    | 56.46 | 36.34 | 83.58  | 61    |       |    |
| 1997                          | 5,041           |       |                    | 3,227 | 7,435  | 37    | 54.70 | 35.01 | 80.67  | 64    |       |    |
| 1998                          | 4,768           |       |                    | 3,113 | 7,198  | 40    | 51.38 | 33.54 | 77.55  | 68    |       |    |
| 1999                          | 4,978           |       |                    | 3,839 | 6,943  | 41    | 53.22 | 41.04 | 74.23  | 71    |       |    |
| 2000                          | 4,274           |       |                    | 2,850 | 6,672  | 47    | 45.31 | 30.21 | 70.73  | 76    |       |    |
| 2001                          | 4,498           |       |                    | 2,843 | 6,373  | 47    | 47.18 | 29.82 | 66.85  | 76    |       |    |
| 2002                          | 4,001           |       |                    | 2,503 | 6,052  | 51    | 41.48 | 25.95 | 62.73  | 83    |       |    |
| 2003                          | 3,912           |       |                    | 2,302 | 5,676  | 55    | 40.28 | 23.70 | 58.46  | 86    |       |    |
| 2004                          | 3,843           |       |                    | 2,091 | 5,284  | 59    | 39.26 | 21.36 | 53.98  | 88    |       |    |
| 2005                          | 3,739           |       |                    | 1,871 | 5,304  | 62    | 37.86 | 18.95 | 53.72  | 93    |       |    |
| 2006                          | 3,608           |       |                    | 1,649 | 5,424  | 67    | 36.23 | 16.56 | 54.47  | 96    |       |    |
| 2007                          | 3,437           | 1,426 | 5,445              | 72    | 34.19  | 14.18 | 54.17 | 95    |        |       |       |    |

| Metropolitan Statistical Area | PWID Population    | Year | Number   | Min   | Max   | Rank  | Rate   | Min   | Max    | Rank  |       |    |
|-------------------------------|--------------------|------|----------|-------|-------|-------|--------|-------|--------|-------|-------|----|
| Kansas City, MO--KS           | Non-Hispanic Black | 1992 | 1,882    | 1,029 | 2,561 | 58    | 145.65 | 79.65 | 198.25 | 89    |       |    |
|                               |                    | 1993 | 1,597    | 1,039 | 2,401 | 59    | 121.47 | 79.07 | 182.65 | 92    |       |    |
|                               |                    | 1994 | 1,694    | 1,137 | 2,268 | 59    | 126.34 | 84.76 | 169.07 | 92    |       |    |
|                               |                    | 1995 | 1,450    | 937   | 2,155 | 59    | 106.15 | 68.58 | 157.81 | 93    |       |    |
|                               |                    | 1996 | 1,402    | 902   | 2,075 | 61    | 100.56 | 64.72 | 148.85 | 93    |       |    |
|                               |                    | 1997 | 1,370    | 877   | 2,021 | 62    | 96.39  | 61.69 | 142.16 | 91    |       |    |
|                               |                    | 1998 | 1,317    | 860   | 1,989 | 62    | 91.32  | 59.61 | 137.84 | 93    |       |    |
|                               |                    | 1999 | 1,425    | 1,099 | 1,988 | 58    | 97.43  | 75.13 | 135.88 | 87    |       |    |
|                               |                    | 2000 | 1,295    | 863   | 2,021 | 60    | 87.08  | 58.06 | 135.93 | 89    |       |    |
|                               |                    | 2001 | 1,474    | 931   | 2,088 | 56    | 97.95  | 61.91 | 138.77 | 85    |       |    |
|                               |                    | 2002 | 1,452    | 909   | 2,196 | 55    | 95.61  | 59.82 | 144.60 | 82    |       |    |
|                               |                    | 2003 | 1,612    | 948   | 2,338 | 48    | 105.17 | 61.88 | 152.60 | 72    |       |    |
|                               |                    | 2004 | 1,842    | 1,002 | 2,533 | 36    | 118.84 | 64.66 | 163.41 | 66    |       |    |
|                               |                    | 2005 | 2,137    | 1,069 | 3,031 | 34    | 136.57 | 68.34 | 193.75 | 58    |       |    |
|                               |                    | 2006 | 2,512    | 1,148 | 3,776 | 28    | 158.26 | 72.33 | 237.91 | 47    |       |    |
|                               |                    | 2007 | 2,969    | 1,232 | 4,704 | 26    | 185.36 | 76.90 | 293.70 | 42    |       |    |
|                               |                    |      | Hispanic | 1992  | 237   | 129   | 322    | 64    | 71.05  | 38.85 | 96.70 | 69 |
|                               |                    |      |          | 1993  | 207   | 135   | 311    | 66    | 57.89  | 37.68 | 87.05 | 76 |
|                               |                    |      |          | 1994  | 223   | 150   | 299    | 65    | 58.22  | 39.06 | 77.91 | 77 |
|                               |                    |      |          | 1995  | 193   | 125   | 286    | 66    | 46.71  | 30.18 | 69.44 | 80 |
| 1996                          | 186                |      |          | 120   | 275   | 67    | 41.48  | 26.70 | 61.40  | 81    |       |    |
| 1997                          | 179                |      |          | 115   | 265   | 67    | 36.83  | 23.57 | 54.31  | 84    |       |    |
| 1998                          | 169                |      |          | 110   | 254   | 68    | 31.96  | 20.87 | 48.25  | 84    |       |    |
| 1999                          | 176                |      |          | 136   | 246   | 72    | 30.95  | 23.86 | 43.16  | 85    |       |    |
| 2000                          | 154                |      |          | 102   | 240   | 72    | 24.94  | 16.62 | 38.93  | 89    |       |    |
| 2001                          | 166                |      |          | 105   | 235   | 72    | 25.50  | 16.12 | 36.13  | 89    |       |    |
| 2002                          | 155                |      |          | 97    | 234   | 74    | 22.50  | 14.08 | 34.03  | 88    |       |    |
| 2003                          | 161                |      |          | 95    | 234   | 74    | 22.38  | 13.17 | 32.47  | 89    |       |    |
| 2004                          | 173                |      |          | 94    | 238   | 74    | 23.02  | 12.53 | 31.66  | 89    |       |    |
| 2005                          | 190                |      |          | 95    | 269   | 73    | 24.00  | 12.01 | 34.05  | 86    |       |    |
| 2006                          | 212                |      |          | 97    | 319   | 72    | 25.64  | 11.72 | 38.54  | 85    |       |    |
| 2007                          | 244                | 101  | 386      | 69    | 28.16 | 11.68 | 44.62  | 82    |        |       |       |    |

| Metropolitan Statistical Area | PWID Population | Year   | Number | Min   | Max   | Rank  | Rate   | Min   | Max    | Rank  |    |
|-------------------------------|-----------------|--------|--------|-------|-------|-------|--------|-------|--------|-------|----|
| Kansas City, MO--KS           | Male            | 1992   | 5,750  | 3,144 | 7,826 | 51    | 109.94 | 60.12 | 149.64 | 67    |    |
|                               |                 | 1993   | 4,913  | 3,198 | 7,387 | 48    | 92.73  | 60.36 | 139.44 | 75    |    |
|                               |                 | 1994   | 5,256  | 3,526 | 7,034 | 55    | 97.76  | 65.59 | 130.82 | 81    |    |
|                               |                 | 1995   | 4,534  | 2,929 | 6,740 | 56    | 83.28  | 53.80 | 123.80 | 80    |    |
|                               |                 | 1996   | 4,409  | 2,838 | 6,526 | 60    | 79.77  | 51.34 | 118.08 | 82    |    |
|                               |                 | 1997   | 4,311  | 2,759 | 6,358 | 62    | 76.79  | 49.15 | 113.26 | 81    |    |
|                               |                 | 1998   | 4,113  | 2,685 | 6,208 | 63    | 72.31  | 47.21 | 109.15 | 84    |    |
|                               |                 | 1999   | 4,364  | 3,365 | 6,086 | 62    | 75.61  | 58.30 | 105.45 | 83    |    |
|                               |                 | 2000   | 3,832  | 2,555 | 5,981 | 67    | 65.38  | 43.59 | 102.05 | 87    |    |
|                               |                 | 2001   | 4,146  | 2,620 | 5,874 | 66    | 69.71  | 44.06 | 98.77  | 85    |    |
|                               |                 | 2002   | 3,808  | 2,383 | 5,760 | 67    | 63.09  | 39.47 | 95.42  | 89    |    |
|                               |                 | 2003   | 3,859  | 2,271 | 5,599 | 66    | 63.29  | 37.24 | 91.84  | 91    |    |
|                               |                 | 2004   | 3,941  | 2,144 | 5,419 | 62    | 63.89  | 34.76 | 87.84  | 93    |    |
|                               |                 | 2005   | 3,994  | 1,999 | 5,667 | 63    | 63.99  | 32.02 | 90.78  | 93    |    |
|                               |                 | 2006   | 4,019  | 1,837 | 6,041 | 64    | 63.49  | 29.02 | 95.44  | 94    |    |
|                               | 2007            | 3,986  | 1,654  | 6,316 | 67    | 62.23 | 25.81  | 98.59 | 94     |       |    |
|                               |                 | Female | 1992   | 2,801 | 1,532 | 3,812 | 55     | 51.75 | 28.30  | 70.44 | 72 |
|                               |                 |        | 1993   | 2,673 | 1,740 | 4,019 | 52     | 48.82 | 31.78  | 73.42 | 73 |
|                               |                 |        | 1994   | 3,103 | 2,082 | 4,152 | 46     | 55.97 | 37.55  | 74.90 | 69 |
|                               |                 |        | 1995   | 2,833 | 1,830 | 4,211 | 49     | 50.51 | 32.63  | 75.09 | 74 |
|                               |                 |        | 1996   | 2,855 | 1,838 | 4,227 | 49     | 50.17 | 32.29  | 74.27 | 72 |
|                               |                 |        | 1997   | 2,847 | 1,822 | 4,199 | 49     | 49.33 | 31.57  | 72.75 | 73 |
|                               |                 |        | 1998   | 2,736 | 1,786 | 4,130 | 52     | 46.85 | 30.59  | 70.72 | 75 |
|                               |                 |        | 1999   | 2,900 | 2,236 | 4,044 | 55     | 49.08 | 37.85  | 68.45 | 79 |
|                               |                 |        | 2000   | 2,534 | 1,689 | 3,955 | 58     | 42.31 | 28.21  | 66.04 | 83 |
|                               | 2001            |        | 2,728  | 1,724 | 3,864 | 59    | 44.94  | 28.40 | 63.67  | 86    |    |
|                               | 2002            | 2,503  | 1,566  | 3,786 | 61    | 40.65 | 25.44  | 61.49 | 86     |       |    |
|                               | 2003            | 2,556  | 1,504  | 3,709 | 61    | 41.10 | 24.18  | 59.64 | 86     |       |    |
|                               | 2004            | 2,664  | 1,449  | 3,663 | 59    | 42.38 | 23.06  | 58.28 | 84     |       |    |
|                               | 2005            | 2,802  | 1,402  | 3,975 | 54    | 44.08 | 22.06  | 62.53 | 82     |       |    |
|                               | 2006            | 2,989  | 1,366  | 4,493 | 51    | 46.54 | 21.27  | 69.96 | 77     |       |    |
|                               | 2007            | 3,226  | 1,338  | 5,112 | 47    | 49.64 | 20.59  | 78.65 | 72     |       |    |

| Metropolitan Statistical Area | PWID Population | Year        | Number | Min   | Max   | Rank  | Rate  | Min    | Max   | Rank   |    |
|-------------------------------|-----------------|-------------|--------|-------|-------|-------|-------|--------|-------|--------|----|
| Kansas City, MO--KS           | Young (15-29)   | 1992        | 2,212  | 1,210 | 3,011 | 51    | 65.00 | 35.55  | 88.47 | 68     |    |
|                               |                 | 1993        | 2,045  | 1,331 | 3,075 | 49    | 60.45 | 39.35  | 90.90 | 63     |    |
|                               |                 | 1994        | 2,316  | 1,554 | 3,099 | 43    | 68.49 | 45.95  | 91.66 | 61     |    |
|                               |                 | 1995        | 2,074  | 1,340 | 3,084 | 48    | 61.10 | 39.48  | 90.84 | 59     |    |
|                               |                 | 1996        | 2,062  | 1,327 | 3,052 | 49    | 60.02 | 38.63  | 88.85 | 62     |    |
|                               |                 | 1997        | 2,037  | 1,304 | 3,004 | 54    | 58.52 | 37.46  | 86.32 | 66     |    |
|                               |                 | 1998        | 1,949  | 1,272 | 2,942 | 57    | 55.30 | 36.10  | 83.47 | 71     |    |
|                               |                 | 1999        | 2,067  | 1,594 | 2,883 | 58    | 58.09 | 44.80  | 81.02 | 75     |    |
|                               |                 | 2000        | 1,817  | 1,211 | 2,836 | 63    | 50.73 | 33.82  | 79.18 | 81     |    |
|                               |                 | 2001        | 1,978  | 1,250 | 2,802 | 66    | 55.26 | 34.92  | 78.29 | 81     |    |
|                               |                 | 2002        | 1,846  | 1,155 | 2,793 | 69    | 51.18 | 32.02  | 77.41 | 84     |    |
|                               |                 | 2003        | 1,928  | 1,135 | 2,798 | 68    | 53.24 | 31.33  | 77.26 | 87     |    |
|                               |                 | 2004        | 2,067  | 1,124 | 2,842 | 67    | 56.53 | 30.76  | 77.73 | 87     |    |
|                               |                 | 2005        | 2,247  | 1,124 | 3,187 | 66    | 60.93 | 30.49  | 86.43 | 83     |    |
|                               |                 | 2006        | 2,487  | 1,137 | 3,739 | 60    | 66.50 | 30.40  | 99.97 | 81     |    |
|                               | 2007            | 2,794       | 1,159  | 4,426 | 54    | 74.05 | 30.72 | 117.32 | 69    |        |    |
|                               |                 | Old (30-64) | 1992   | 6,345 | 3,470 | 8,636 | 54    | 87.65  | 47.93 | 119.31 | 73 |
|                               |                 |             | 1993   | 5,541 | 3,607 | 8,332 | 55    | 74.98  | 48.81 | 112.75 | 81 |
|                               |                 |             | 1994   | 6,043 | 4,054 | 8,086 | 54    | 80.15  | 53.77 | 107.25 | 82 |
|                               |                 |             | 1995   | 5,295 | 3,421 | 7,872 | 57    | 69.14  | 44.67 | 102.79 | 81 |
|                               | 1996            |             | 5,210  | 3,353 | 7,712 | 58    | 66.94 | 43.09  | 99.09 | 82     |    |
|                               | 1997            |             | 5,135  | 3,286 | 7,573 | 59    | 64.95 | 41.57  | 95.80 | 80     |    |
|                               | 1998            |             | 4,918  | 3,211 | 7,423 | 60    | 61.46 | 40.12  | 92.77 | 82     |    |
|                               | 1999            |             | 5,219  | 4,025 | 7,279 | 57    | 64.26 | 49.56  | 89.63 | 84     |    |
|                               | 2000            |             | 4,570  | 3,046 | 7,133 | 62    | 55.27 | 36.85  | 86.27 | 87     |    |
|                               | 2001            |             | 4,917  | 3,107 | 6,966 | 60    | 58.27 | 36.83  | 82.56 | 83     |    |
|                               | 2002            | 4,481       | 2,804  | 6,777 | 62    | 52.19 | 32.65 | 78.93  | 87    |        |    |
|                               | 2003            | 4,497       | 2,646  | 6,525 | 60    | 51.72 | 30.43 | 75.05  | 85    |        |    |
|                               | 2004            | 4,538       | 2,469  | 6,240 | 58    | 51.58 | 28.07 | 70.93  | 83    |        |    |
|                               | 2005            | 4,533       | 2,268  | 6,431 | 57    | 50.87 | 25.46 | 72.17  | 83    |        |    |
|                               | 2006            | 4,476       | 2,046  | 6,729 | 56    | 49.67 | 22.70 | 74.67  | 82    |        |    |
|                               | 2007            | 4,329       | 1,796  | 6,859 | 55    | 47.41 | 19.67 | 75.11  | 83    |        |    |



| Metropolitan Statistical Area | PWID Population | Year  | Number             | Min   | Max    | Rank  | Rate   | Min   | Max    | Rank  |       |    |
|-------------------------------|-----------------|-------|--------------------|-------|--------|-------|--------|-------|--------|-------|-------|----|
| Knoxville, TN                 | Total           | 1992  | 3,825              | 2,462 | 5,485  | 85    | 92.38  | 59.45 | 132.47 | 60    |       |    |
|                               |                 | 1993  | 3,417              | 1,657 | 5,257  | 84    | 81.06  | 39.31 | 124.69 | 64    |       |    |
|                               |                 | 1994  | 4,203              | 3,709 | 5,020  | 83    | 97.60  | 86.12 | 116.58 | 52    |       |    |
|                               |                 | 1995  | 3,751              | 1,782 | 4,771  | 83    | 85.29  | 40.53 | 108.47 | 59    |       |    |
|                               |                 | 1996  | 3,950              | 1,869 | 5,168  | 83    | 88.16  | 41.71 | 115.35 | 57    |       |    |
|                               |                 | 1997  | 4,103              | 1,963 | 5,828  | 84    | 90.51  | 43.30 | 128.56 | 55    |       |    |
|                               |                 | 1998  | 4,145              | 2,054 | 6,052  | 84    | 90.57  | 44.88 | 132.23 | 55    |       |    |
|                               |                 | 1999  | 4,695              | 3,552 | 5,760  | 84    | 101.63 | 76.90 | 124.70 | 51    |       |    |
|                               |                 | 2000  | 3,934              | 2,257 | 5,195  | 85    | 84.21  | 48.31 | 111.21 | 59    |       |    |
|                               |                 | 2001  | 4,296              | 3,096 | 5,166  | 84    | 90.74  | 65.40 | 109.12 | 57    |       |    |
|                               |                 | 2002  | 3,938              | 2,903 | 5,378  | 86    | 82.10  | 60.53 | 112.14 | 61    |       |    |
|                               |                 | 2003  | 4,127              | 3,137 | 5,599  | 86    | 84.96  | 64.59 | 115.26 | 57    |       |    |
|                               |                 | 2004  | 4,491              | 3,219 | 5,829  | 85    | 91.26  | 65.42 | 118.46 | 52    |       |    |
|                               |                 | 2005  | 4,901              | 3,313 | 6,197  | 80    | 98.02  | 66.26 | 123.93 | 45    |       |    |
|                               |                 | 2006  | 5,347              | 3,426 | 7,163  | 78    | 105.04 | 67.30 | 140.71 | 39    |       |    |
|                               |                 | 2007  | 5,801              | 3,533 | 8,166  | 74    | 112.21 | 68.34 | 157.96 | 30    |       |    |
|                               |                 |       | Non-Hispanic White | 1992  | 2,650  | 1,706 | 3,800  | 73    | 69.17  | 44.51 | 99.18 | 54 |
|                               |                 |       |                    | 1993  | 2,387  | 1,157 | 3,672  | 73    | 61.27  | 29.71 | 94.25 | 57 |
|                               |                 |       |                    | 1994  | 2,977  | 2,627 | 3,557  | 71    | 74.91  | 66.10 | 89.48 | 51 |
|                               |                 |       |                    | 1995  | 2,707  | 1,286 | 3,443  | 73    | 66.76  | 31.72 | 84.91 | 54 |
| 1996                          | 2,912           |       |                    | 1,378 | 3,810  | 71    | 70.60  | 33.40 | 92.37  | 54    |       |    |
| 1997                          | 3,094           |       |                    | 1,480 | 4,395  | 67    | 74.22  | 35.50 | 105.43 | 54    |       |    |
| 1998                          | 3,199           |       |                    | 1,585 | 4,671  | 65    | 76.11  | 37.72 | 111.12 | 52    |       |    |
| 1999                          | 3,705           |       |                    | 2,804 | 4,547  | 60    | 87.46  | 66.17 | 107.31 | 41    |       |    |
| 2000                          | 3,170           |       |                    | 1,819 | 4,187  | 65    | 74.21  | 42.57 | 98.00  | 54    |       |    |
| 2001                          | 3,528           |       |                    | 2,543 | 4,242  | 63    | 81.61  | 58.81 | 98.13  | 49    |       |    |
| 2002                          | 3,287           |       |                    | 2,424 | 4,490  | 66    | 75.20  | 55.44 | 102.71 | 52    |       |    |
| 2003                          | 3,493           |       |                    | 2,655 | 4,738  | 64    | 79.04  | 60.09 | 107.23 | 46    |       |    |
| 2004                          | 3,842           |       |                    | 2,754 | 4,987  | 60    | 86.03  | 61.67 | 111.67 | 42    |       |    |
| 2005                          | 4,227           |       |                    | 2,857 | 5,344  | 55    | 93.32  | 63.08 | 117.99 | 37    |       |    |
| 2006                          | 4,634           |       |                    | 2,969 | 6,207  | 48    | 100.75 | 64.56 | 134.97 | 35    |       |    |
| 2007                          | 5,033           | 3,065 | 7,086              | 45    | 108.08 | 65.82 | 152.14 | 27    |        |       |       |    |

| Metropolitan Statistical Area | PWID Population    | Year | Number   | Min  | Max   | Rank  | Rate   | Min    | Max    | Rank  |       |    |
|-------------------------------|--------------------|------|----------|------|-------|-------|--------|--------|--------|-------|-------|----|
| Knoxville, TN                 | Non-Hispanic Black | 1992 | 1,031    | 663  | 1,478 | 78    | 435.93 | 280.56 | 625.14 | 26    |       |    |
|                               |                    | 1993 | 874      | 424  | 1,344 | 81    | 361.68 | 175.38 | 556.37 | 34    |       |    |
|                               |                    | 1994 | 1,002    | 884  | 1,197 | 74    | 407.61 | 359.67 | 486.90 | 21    |       |    |
|                               |                    | 1995 | 822      | 391  | 1,046 | 79    | 327.79 | 155.76 | 416.92 | 29    |       |    |
|                               |                    | 1996 | 785      | 372  | 1,027 | 77    | 307.21 | 145.34 | 401.95 | 27    |       |    |
|                               |                    | 1997 | 732      | 350  | 1,039 | 78    | 283.24 | 135.49 | 402.33 | 29    |       |    |
|                               |                    | 1998 | 657      | 326  | 960   | 80    | 252.07 | 124.92 | 368.03 | 34    |       |    |
|                               |                    | 1999 | 658      | 498  | 808   | 81    | 250.54 | 189.56 | 307.41 | 27    |       |    |
|                               |                    | 2000 | 487      | 279  | 643   | 87    | 181.24 | 103.97 | 239.36 | 49    |       |    |
|                               |                    | 2001 | 470      | 339  | 565   | 87    | 171.94 | 123.92 | 206.75 | 55    |       |    |
|                               |                    | 2002 | 383      | 282  | 523   | 89    | 137.81 | 101.61 | 188.24 | 63    |       |    |
|                               |                    | 2003 | 360      | 274  | 489   | 89    | 126.83 | 96.42  | 172.06 | 65    |       |    |
|                               |                    | 2004 | 357      | 256  | 464   | 89    | 122.86 | 88.07  | 159.47 | 62    |       |    |
|                               |                    | 2005 | 362      | 245  | 458   | 89    | 121.26 | 81.97  | 153.32 | 63    |       |    |
|                               |                    | 2006 | 376      | 241  | 503   | 91    | 121.29 | 77.72  | 162.48 | 63    |       |    |
|                               |                    | 2007 | 400      | 243  | 563   | 89    | 125.84 | 76.64  | 177.16 | 60    |       |    |
|                               |                    |      | Hispanic | 1992 | 17    | 11    | 24     | 97     | 67.91  | 43.71 | 97.39 | 72 |
|                               |                    |      |          | 1993 | 16    | 8     | 25     | 98     | 59.29  | 28.75 | 91.20 | 73 |
|                               |                    |      |          | 1994 | 20    | 18    | 24     | 97     | 67.28  | 59.37 | 80.37 | 73 |
|                               |                    |      |          | 1995 | 18    | 9     | 23     | 97     | 54.23  | 25.77 | 68.97 | 74 |
| 1996                          | 19                 |      |          | 9    | 25    | 96    | 49.94  | 23.63  | 65.34  | 75    |       |    |
| 1997                          | 19                 |      |          | 9    | 27    | 97    | 45.57  | 21.80  | 64.73  | 75    |       |    |
| 1998                          | 18                 |      |          | 9    | 27    | 98    | 39.29  | 19.47  | 57.37  | 78    |       |    |
| 1999                          | 20                 |      |          | 15   | 24    | 98    | 38.11  | 28.83  | 46.75  | 79    |       |    |
| 2000                          | 16                 |      |          | 9    | 21    | 99    | 26.31  | 15.09  | 34.75  | 87    |       |    |
| 2001                          | 16                 |      |          | 12   | 19    | 98    | 25.52  | 18.39  | 30.69  | 88    |       |    |
| 2002                          | 14                 |      |          | 10   | 19    | 98    | 20.69  | 15.25  | 28.26  | 91    |       |    |
| 2003                          | 15                 |      |          | 11   | 20    | 98    | 20.04  | 15.23  | 27.18  | 91    |       |    |
| 2004                          | 16                 |      |          | 11   | 21    | 98    | 20.31  | 14.56  | 26.37  | 92    |       |    |
| 2005                          | 18                 |      |          | 12   | 23    | 97    | 21.27  | 14.38  | 26.90  | 92    |       |    |
| 2006                          | 21                 | 13   | 28       | 97   | 22.90 | 14.67 | 30.68  | 88     |        |       |       |    |
| 2007                          | 25                 | 15   | 35       | 97   | 25.26 | 15.38 | 35.56  | 87     |        |       |       |    |

| Metropolitan Statistical Area | PWID Population | Year   | Number | Min   | Max   | Rank   | Rate   | Min    | Max    | Rank   |    |
|-------------------------------|-----------------|--------|--------|-------|-------|--------|--------|--------|--------|--------|----|
| Knoxville, TN                 | Male            | 1992   | 2,509  | 1,615 | 3,597 | 85     | 123.85 | 79.71  | 177.60 | 58     |    |
|                               |                 | 1993   | 2,177  | 1,055 | 3,348 | 85     | 105.45 | 51.13  | 162.21 | 66     |    |
|                               |                 | 1994   | 2,614  | 2,307 | 3,123 | 83     | 123.91 | 109.33 | 148.01 | 54     |    |
|                               |                 | 1995   | 2,291  | 1,089 | 2,914 | 84     | 106.22 | 50.47  | 135.10 | 63     |    |
|                               |                 | 1996   | 2,382  | 1,127 | 3,116 | 84     | 108.33 | 51.25  | 141.74 | 61     |    |
|                               |                 | 1997   | 2,452  | 1,173 | 3,483 | 84     | 110.31 | 52.77  | 156.69 | 58     |    |
|                               |                 | 1998   | 2,465  | 1,222 | 3,599 | 84     | 109.74 | 54.39  | 160.23 | 57     |    |
|                               |                 | 1999   | 2,786  | 2,108 | 3,418 | 84     | 122.73 | 92.85  | 150.58 | 52     |    |
|                               |                 | 2000   | 2,333  | 1,339 | 3,082 | 86     | 101.57 | 58.26  | 134.14 | 62     |    |
|                               |                 | 2001   | 2,549  | 1,837 | 3,066 | 85     | 109.50 | 78.92  | 131.67 | 59     |    |
|                               |                 | 2002   | 2,337  | 1,723 | 3,193 | 86     | 99.19  | 73.13  | 135.49 | 62     |    |
|                               |                 | 2003   | 2,448  | 1,861 | 3,321 | 86     | 102.68 | 78.06  | 139.30 | 59     |    |
|                               |                 | 2004   | 2,656  | 1,904 | 3,448 | 86     | 109.77 | 78.69  | 142.48 | 56     |    |
|                               |                 | 2005   | 2,882  | 1,948 | 3,644 | 85     | 117.07 | 79.13  | 148.01 | 48     |    |
|                               |                 | 2006   | 3,112  | 1,994 | 4,169 | 79     | 124.23 | 79.60  | 166.42 | 44     |    |
|                               | 2007            | 3,324  | 2,024  | 4,680 | 75    | 130.42 | 79.43  | 183.60 | 36     |        |    |
|                               |                 | Female | 1992   | 1,383 | 890   | 1,983  | 81     | 65.37  | 42.07  | 93.75  | 57 |
|                               |                 |        | 1993   | 1,290 | 625   | 1,984  | 82     | 59.94  | 29.06  | 92.20  | 57 |
|                               |                 |        | 1994   | 1,643 | 1,450 | 1,963  | 79     | 74.81  | 66.02  | 89.37  | 47 |
|                               |                 |        | 1995   | 1,509 | 717   | 1,919  | 80     | 67.33  | 31.99  | 85.64  | 54 |
|                               |                 |        | 1996   | 1,625 | 769   | 2,126  | 79     | 71.22  | 33.69  | 93.19  | 51 |
|                               |                 |        | 1997   | 1,717 | 822   | 2,440  | 79     | 74.35  | 35.57  | 105.61 | 48 |
|                               |                 |        | 1998   | 1,757 | 871   | 2,565  | 79     | 75.40  | 37.37  | 110.09 | 48 |
|                               |                 |        | 1999   | 2,007 | 1,519 | 2,463  | 73     | 85.44  | 64.65  | 104.84 | 37 |
|                               |                 |        | 2000   | 1,690 | 970   | 2,232  | 80     | 71.20  | 40.84  | 94.03  | 48 |
|                               | 2001            |        | 1,849  | 1,333 | 2,224 | 80     | 76.86  | 55.39  | 92.42  | 47     |    |
|                               | 2002            | 1,693  | 1,249  | 2,313 | 81    | 69.42  | 51.18  | 94.82  | 52     |        |    |
|                               | 2003            | 1,770  | 1,345  | 2,401 | 80    | 71.54  | 54.38  | 97.05  | 45     |        |    |
|                               | 2004            | 1,916  | 1,374  | 2,487 | 77    | 76.63  | 54.93  | 99.46  | 39     |        |    |
|                               | 2005            | 2,079  | 1,405  | 2,628 | 71    | 81.89  | 55.36  | 103.54 | 31     |        |    |
|                               | 2006            | 2,252  | 1,443  | 3,017 | 68    | 87.09  | 55.80  | 116.67 | 24     |        |    |
|                               | 2007            | 2,425  | 1,477  | 3,413 | 63    | 92.52  | 56.35  | 130.24 | 22     |        |    |

| Metropolitan Statistical Area | PWID Population | Year  | Number      | Min   | Max   | Rank  | Rate   | Min    | Max    | Rank  |        |    |
|-------------------------------|-----------------|-------|-------------|-------|-------|-------|--------|--------|--------|-------|--------|----|
| Knoxville, TN                 | Young (15-29)   | 1992  | 1,302       | 838   | 1,867 | 77    | 94.67  | 60.93  | 135.76 | 45    |        |    |
|                               |                 | 1993  | 1,048       | 508   | 1,611 | 78    | 76.08  | 36.89  | 117.03 | 52    |        |    |
|                               |                 | 1994  | 1,196       | 1,056 | 1,429 | 78    | 86.45  | 76.28  | 103.27 | 48    |        |    |
|                               |                 | 1995  | 1,022       | 486   | 1,300 | 80    | 73.13  | 34.75  | 93.01  | 55    |        |    |
|                               |                 | 1996  | 1,060       | 502   | 1,387 | 80    | 75.06  | 35.51  | 98.22  | 55    |        |    |
|                               |                 | 1997  | 1,113       | 532   | 1,581 | 81    | 79.02  | 37.80  | 112.25 | 53    |        |    |
|                               |                 | 1998  | 1,162       | 576   | 1,697 | 81    | 82.24  | 40.75  | 120.07 | 55    |        |    |
|                               |                 | 1999  | 1,385       | 1,048 | 1,699 | 79    | 98.09  | 74.21  | 120.36 | 42    |        |    |
|                               |                 | 2000  | 1,238       | 710   | 1,635 | 83    | 87.68  | 50.29  | 115.79 | 53    |        |    |
|                               |                 | 2001  | 1,456       | 1,049 | 1,750 | 82    | 102.46 | 73.85  | 123.21 | 44    |        |    |
|                               |                 | 2002  | 1,443       | 1,064 | 1,971 | 81    | 100.85 | 74.35  | 137.75 | 48    |        |    |
|                               |                 | 2003  | 1,638       | 1,245 | 2,222 | 77    | 113.04 | 85.93  | 153.36 | 41    |        |    |
|                               |                 | 2004  | 1,924       | 1,379 | 2,497 | 73    | 130.35 | 93.45  | 169.19 | 27    |        |    |
|                               |                 | 2005  | 2,254       | 1,524 | 2,850 | 65    | 149.86 | 101.30 | 189.47 | 24    |        |    |
|                               |                 | 2006  | 2,618       | 1,677 | 3,507 | 57    | 170.52 | 109.26 | 228.42 | 17    |        |    |
|                               |                 | 2007  | 2,993       | 1,823 | 4,213 | 49    | 191.02 | 116.33 | 268.90 | 14    |        |    |
|                               |                 |       | Old (30-64) | 1992  | 2,561 | 1,648 | 3,672  | 86     | 92.59  | 59.59 | 132.78 | 68 |
|                               |                 |       |             | 1993  | 2,385 | 1,157 | 3,669  | 86     | 84.02  | 40.74 | 129.25 | 69 |
|                               |                 |       |             | 1994  | 3,020 | 2,665 | 3,608  | 84     | 103.34 | 91.19 | 123.44 | 58 |
|                               |                 |       |             | 1995  | 2,747 | 1,305 | 3,494  | 84     | 91.54  | 43.50 | 116.43 | 63 |
| 1996                          | 2,923           |       |             | 1,383 | 3,824 | 82    | 95.25  | 45.06  | 124.63 | 59    |        |    |
| 1997                          | 3,043           |       |             | 1,455 | 4,322 | 82    | 97.38  | 46.58  | 138.32 | 56    |        |    |
| 1998                          | 3,057           |       |             | 1,515 | 4,464 | 81    | 96.64  | 47.90  | 141.11 | 57    |        |    |
| 1999                          | 3,417           |       |             | 2,585 | 4,193 | 79    | 106.55 | 80.61  | 130.73 | 49    |        |    |
| 2000                          | 2,801           |       |             | 1,607 | 3,700 | 83    | 85.95  | 49.30  | 113.51 | 58    |        |    |
| 2001                          | 2,965           |       |             | 2,137 | 3,565 | 81    | 89.47  | 64.48  | 107.59 | 55    |        |    |
| 2002                          | 2,605           |       |             | 1,920 | 3,558 | 86    | 77.41  | 57.07  | 105.73 | 58    |        |    |
| 2003                          | 2,583           |       |             | 1,964 | 3,504 | 86    | 75.78  | 57.61  | 102.81 | 58    |        |    |
| 2004                          | 2,619           |       |             | 1,878 | 3,400 | 85    | 76.04  | 54.51  | 98.70  | 56    |        |    |
| 2005                          | 2,616           |       |             | 1,768 | 3,307 | 84    | 74.83  | 50.58  | 94.60  | 56    |        |    |
| 2006                          | 2,556           |       |             | 1,638 | 3,424 | 85    | 71.88  | 46.06  | 96.30  | 56    |        |    |
| 2007                          | 2,425           | 1,477 | 3,413       | 86    | 67.30 | 40.99 | 94.74  | 59     |        |       |        |    |

| Metropolitan Statistical Area | PWID Population | Year  | Number             | Min    | Max    | Rank  | Rate   | Min    | Max    | Rank   |        |    |
|-------------------------------|-----------------|-------|--------------------|--------|--------|-------|--------|--------|--------|--------|--------|----|
| Las Vegas, NV--AZ             | Total           | 1992  | 13,979             | 9,732  | 17,927 | 34    | 212.09 | 147.65 | 271.98 | 14     |        |    |
|                               |                 | 1993  | 11,643             | 4,195  | 17,512 | 35    | 168.91 | 60.86  | 254.04 | 22     |        |    |
|                               |                 | 1994  | 14,690             | 12,296 | 17,547 | 32    | 197.78 | 165.55 | 236.24 | 15     |        |    |
|                               |                 | 1995  | 12,837             | 5,991  | 17,374 | 32    | 162.16 | 75.68  | 219.47 | 21     |        |    |
|                               |                 | 1996  | 13,339             | 6,915  | 17,090 | 30    | 159.15 | 82.50  | 203.89 | 19     |        |    |
|                               |                 | 1997  | 14,024             | 7,944  | 17,053 | 29    | 156.20 | 88.48  | 189.93 | 18     |        |    |
|                               |                 | 1998  | 14,377             | 8,904  | 17,715 | 29    | 151.44 | 93.79  | 186.59 | 20     |        |    |
|                               |                 | 1999  | 16,294             | 14,190 | 18,336 | 25    | 162.85 | 141.82 | 183.26 | 16     |        |    |
|                               |                 | 2000  | 14,502             | 9,076  | 17,884 | 29    | 137.48 | 86.05  | 169.56 | 24     |        |    |
|                               |                 | 2001  | 16,104             | 15,491 | 17,112 | 24    | 146.68 | 141.10 | 155.86 | 21     |        |    |
|                               |                 | 2002  | 13,949             | 7,746  | 17,022 | 29    | 122.49 | 68.02  | 149.47 | 32     |        |    |
|                               |                 | 2003  | 13,659             | 6,944  | 18,373 | 30    | 115.87 | 58.91  | 155.86 | 33     |        |    |
|                               |                 | 2004  | 13,717             | 6,746  | 19,984 | 30    | 111.20 | 54.69  | 162.00 | 36     |        |    |
|                               |                 | 2005  | 13,709             | 6,579  | 21,564 | 29    | 106.89 | 51.30  | 168.13 | 36     |        |    |
|                               |                 | 2006  | 13,759             | 6,458  | 23,339 | 30    | 103.06 | 48.38  | 174.82 | 41     |        |    |
|                               |                 | 2007  | 13,667             | 6,320  | 24,963 | 31    | 99.38  | 45.96  | 181.51 | 40     |        |    |
|                               |                 |       | Non-Hispanic White | 1992   | 10,887 | 7,579 | 13,961 | 19     | 218.39 | 152.04 | 280.06 | 6  |
|                               |                 |       |                    | 1993   | 8,800  | 3,171 | 13,235 | 23     | 170.95 | 61.60  | 257.12 | 11 |
|                               |                 |       |                    | 1994   | 10,802 | 9,041 | 12,902 | 17     | 197.97 | 165.71 | 236.47 | 8  |
|                               |                 |       |                    | 1995   | 9,211  | 4,299 | 12,467 | 23     | 161.41 | 75.33  | 218.45 | 9  |
| 1996                          | 9,371           |       |                    | 4,858  | 12,006 | 22    | 157.90 | 81.86  | 202.29 | 9      |        |    |
| 1997                          | 9,677           |       |                    | 5,481  | 11,767 | 19    | 155.78 | 88.24  | 189.42 | 7      |        |    |
| 1998                          | 9,775           |       |                    | 6,054  | 12,045 | 19    | 152.34 | 94.35  | 187.71 | 7      |        |    |
| 1999                          | 10,947          |       |                    | 9,533  | 12,318 | 17    | 165.72 | 144.32 | 186.48 | 7      |        |    |
| 2000                          | 9,650           |       |                    | 6,040  | 11,901 | 21    | 141.41 | 88.50  | 174.40 | 12     |        |    |
| 2001                          | 10,636          |       |                    | 10,231 | 11,302 | 18    | 152.14 | 146.35 | 161.66 | 11     |        |    |
| 2002                          | 9,158           |       |                    | 5,085  | 11,175 | 21    | 128.18 | 71.17  | 156.41 | 15     |        |    |
| 2003                          | 8,923           |       |                    | 4,536  | 12,003 | 22    | 122.12 | 62.08  | 164.27 | 16     |        |    |
| 2004                          | 8,920           |       |                    | 4,387  | 12,995 | 21    | 118.30 | 58.18  | 172.34 | 19     |        |    |
| 2005                          | 8,874           |       |                    | 4,259  | 13,958 | 21    | 115.42 | 55.39  | 181.56 | 23     |        |    |
| 2006                          | 8,858           |       |                    | 4,158  | 15,026 | 23    | 113.07 | 53.07  | 191.80 | 23     |        |    |
| 2007                          | 8,741           | 4,042 | 15,966             | 23     | 110.59 | 51.14 | 201.99 | 25     |        |        |        |    |

| Metropolitan Statistical Area | PWID Population    | Year | Number   | Min   | Max   | Rank  | Rate   | Min    | Max    | Rank  |        |    |
|-------------------------------|--------------------|------|----------|-------|-------|-------|--------|--------|--------|-------|--------|----|
| Las Vegas, NV--AZ             | Non-Hispanic Black | 1992 | 1,890    | 1,316 | 2,424 | 56    | 358.84 | 249.81 | 460.17 | 37    |        |    |
|                               |                    | 1993 | 1,547    | 557   | 2,326 | 60    | 283.28 | 102.07 | 426.07 | 49    |        |    |
|                               |                    | 1994 | 1,912    | 1,600 | 2,284 | 55    | 321.62 | 269.21 | 384.15 | 38    |        |    |
|                               |                    | 1995 | 1,634    | 763   | 2,212 | 57    | 257.83 | 120.33 | 348.96 | 47    |        |    |
|                               |                    | 1996 | 1,660    | 860   | 2,126 | 54    | 247.43 | 128.28 | 317.00 | 45    |        |    |
|                               |                    | 1997 | 1,706    | 966   | 2,075 | 53    | 235.54 | 133.42 | 286.42 | 45    |        |    |
|                               |                    | 1998 | 1,713    | 1,061 | 2,111 | 51    | 222.05 | 137.52 | 273.60 | 44    |        |    |
|                               |                    | 1999 | 1,908    | 1,661 | 2,147 | 46    | 233.90 | 203.70 | 263.21 | 36    |        |    |
|                               |                    | 2000 | 1,675    | 1,048 | 2,066 | 51    | 195.46 | 122.33 | 241.05 | 42    |        |    |
|                               |                    | 2001 | 1,845    | 1,775 | 1,960 | 45    | 205.14 | 197.33 | 217.98 | 39    |        |    |
|                               |                    | 2002 | 1,595    | 886   | 1,946 | 49    | 169.30 | 94.00  | 206.59 | 47    |        |    |
|                               |                    | 2003 | 1,571    | 799   | 2,113 | 51    | 159.92 | 81.30  | 215.12 | 51    |        |    |
|                               |                    | 2004 | 1,601    | 787   | 2,333 | 47    | 153.45 | 75.47  | 223.55 | 51    |        |    |
|                               |                    | 2005 | 1,642    | 788   | 2,582 | 45    | 148.27 | 71.16  | 233.23 | 52    |        |    |
|                               |                    | 2006 | 1,712    | 804   | 2,904 | 44    | 145.60 | 68.34  | 246.98 | 54    |        |    |
|                               |                    | 2007 | 1,794    | 829   | 3,276 | 44    | 145.66 | 67.36  | 266.04 | 53    |        |    |
|                               |                    |      | Hispanic | 1992  | 873   | 608   | 1,119  | 40     | 113.26 | 78.85 | 145.24 | 58 |
|                               |                    |      |          | 1993  | 698   | 251   | 1,049  | 48     | 81.37  | 29.32 | 122.38 | 61 |
|                               |                    |      |          | 1994  | 867   | 726   | 1,035  | 41     | 87.56  | 73.29 | 104.58 | 62 |
|                               |                    |      |          | 1995  | 763   | 356   | 1,032  | 47     | 66.80  | 31.17 | 90.40  | 64 |
| 1996                          | 813                |      |          | 421   | 1,041 | 45    | 62.79  | 32.55  | 80.44  | 66    |        |    |
| 1997                          | 889                |      |          | 504   | 1,081 | 44    | 59.18  | 33.52  | 71.96  | 66    |        |    |
| 1998                          | 958                |      |          | 593   | 1,181 | 43    | 56.15  | 34.77  | 69.18  | 69    |        |    |
| 1999                          | 1,150              |      |          | 1,001 | 1,294 | 42    | 60.07  | 52.31  | 67.60  | 65    |        |    |
| 2000                          | 1,087              |      |          | 680   | 1,341 | 44    | 51.23  | 32.07  | 63.19  | 66    |        |    |
| 2001                          | 1,282              |      |          | 1,233 | 1,362 | 42    | 55.99  | 53.86  | 59.50  | 64    |        |    |
| 2002                          | 1,176              |      |          | 653   | 1,435 | 44    | 48.10  | 26.71  | 58.70  | 65    |        |    |
| 2003                          | 1,212              |      |          | 616   | 1,630 | 44    | 46.75  | 23.77  | 62.89  | 66    |        |    |
| 2004                          | 1,270              |      |          | 624   | 1,849 | 43    | 45.68  | 22.47  | 66.55  | 66    |        |    |
| 2005                          | 1,308              |      |          | 628   | 2,058 | 43    | 43.77  | 21.00  | 68.84  | 68    |        |    |
| 2006                          | 1,335              | 626  | 2,264    | 43    | 41.43 | 19.45 | 70.27  | 67     |        |       |        |    |
| 2007                          | 1,326              | 613  | 2,422    | 43    | 38.62 | 17.86 | 70.53  | 73     |        |       |        |    |

| Metropolitan Statistical Area | PWID Population | Year   | Number | Min    | Max    | Rank   | Rate   | Min    | Max    | Rank   |    |
|-------------------------------|-----------------|--------|--------|--------|--------|--------|--------|--------|--------|--------|----|
| Las Vegas, NV--AZ             | Male            | 1992   | 9,044  | 6,296  | 11,598 | 35     | 268.09 | 186.64 | 343.79 | 16     |    |
|                               |                 | 1993   | 7,631  | 2,750  | 11,478 | 38     | 216.64 | 78.06  | 325.83 | 26     |    |
|                               |                 | 1994   | 9,722  | 8,137  | 11,612 | 33     | 255.91 | 214.21 | 305.67 | 16     |    |
|                               |                 | 1995   | 8,552  | 3,991  | 11,575 | 31     | 211.27 | 98.60  | 285.94 | 25     |    |
|                               |                 | 1996   | 8,923  | 4,626  | 11,432 | 31     | 208.33 | 108.00 | 266.90 | 22     |    |
|                               |                 | 1997   | 9,398  | 5,323  | 11,427 | 28     | 204.59 | 115.89 | 248.78 | 22     |    |
|                               |                 | 1998   | 9,632  | 5,965  | 11,868 | 28     | 198.25 | 122.78 | 244.28 | 22     |    |
|                               |                 | 1999   | 10,893 | 9,486  | 12,257 | 22     | 212.61 | 185.15 | 239.24 | 17     |    |
|                               |                 | 2000   | 9,658  | 6,045  | 11,911 | 27     | 178.74 | 111.87 | 220.44 | 27     |    |
|                               |                 | 2001   | 10,670 | 10,264 | 11,337 | 23     | 189.98 | 182.75 | 201.87 | 22     |    |
|                               |                 | 2002   | 9,184  | 5,099  | 11,207 | 26     | 157.95 | 87.70  | 192.74 | 34     |    |
|                               |                 | 2003   | 8,927  | 4,538  | 12,007 | 28     | 148.43 | 75.46  | 199.66 | 36     |    |
|                               |                 | 2004   | 8,892  | 4,373  | 12,954 | 29     | 141.24 | 69.46  | 205.76 | 38     |    |
|                               |                 | 2005   | 8,809  | 4,228  | 13,856 | 29     | 134.37 | 64.49  | 211.36 | 39     |    |
|                               | 2006            | 8,761  | 4,112  | 14,861 | 29     | 128.28 | 60.21  | 217.60 | 41     |        |    |
|                               | 2007            | 8,622  | 3,987  | 15,749 | 29     | 122.50 | 56.65  | 223.74 | 42     |        |    |
|                               |                 | Female | 1992   | 5,042  | 3,510  | 6,466  | 31     | 156.69 | 109.08 | 200.93 | 8  |
|                               |                 |        | 1993   | 4,098  | 1,476  | 6,163  | 35     | 121.58 | 43.81  | 182.86 | 21 |
|                               |                 |        | 1994   | 5,072  | 4,246  | 6,059  | 31     | 139.79 | 117.01 | 166.97 | 12 |
|                               |                 |        | 1995   | 4,371  | 2,040  | 5,916  | 32     | 112.99 | 52.73  | 152.93 | 20 |
|                               |                 |        | 1996   | 4,501  | 2,333  | 5,766  | 32     | 109.81 | 56.93  | 140.68 | 19 |
|                               |                 |        | 1997   | 4,709  | 2,668  | 5,726  | 31     | 107.39 | 60.83  | 130.59 | 19 |
|                               |                 |        | 1998   | 4,824  | 2,988  | 5,945  | 29     | 104.07 | 64.45  | 128.23 | 18 |
|                               |                 |        | 1999   | 5,483  | 4,775  | 6,170  | 26     | 112.31 | 97.81  | 126.38 | 17 |
|                               |                 |        | 2000   | 4,909  | 3,072  | 6,054  | 29     | 95.42  | 59.72  | 117.68 | 23 |
|                               |                 |        | 2001   | 5,498  | 5,289  | 5,842  | 28     | 102.53 | 98.63  | 108.95 | 24 |
|                               | 2002            |        | 4,814  | 2,673  | 5,875  | 32     | 86.38  | 47.96  | 105.40 | 33     |    |
|                               | 2003            |        | 4,773  | 2,427  | 6,420  | 32     | 82.66  | 42.03  | 111.19 | 33     |    |
|                               | 2004            | 4,860  | 2,390  | 7,080  | 31     | 80.45  | 39.57  | 117.21 | 34     |        |    |
|                               | 2005            | 4,928  | 2,365  | 7,752  | 31     | 78.60  | 37.72  | 123.63 | 36     |        |    |
|                               | 2006            | 5,022  | 2,357  | 8,518  | 28     | 77.01  | 36.15  | 130.62 | 37     |        |    |
|                               | 2007            | 5,064  | 2,342  | 9,250  | 27     | 75.43  | 34.88  | 137.77 | 36     |        |    |

| Metropolitan Statistical Area | PWID Population | Year  | Number      | Min    | Max    | Rank  | Rate   | Min    | Max    | Rank   |        |    |
|-------------------------------|-----------------|-------|-------------|--------|--------|-------|--------|--------|--------|--------|--------|----|
| Las Vegas, NV--AZ             | Young (15-29)   | 1992  | 3,003       | 2,091  | 3,851  | 39    | 143.86 | 100.15 | 184.48 | 19     |        |    |
|                               |                 | 1993  | 2,271       | 818    | 3,416  | 45    | 106.51 | 38.38  | 160.20 | 35     |        |    |
|                               |                 | 1994  | 2,758       | 2,308  | 3,294  | 39    | 122.39 | 102.45 | 146.19 | 27     |        |    |
|                               |                 | 1995  | 2,435       | 1,136  | 3,295  | 43    | 102.93 | 48.04  | 139.31 | 40     |        |    |
|                               |                 | 1996  | 2,653       | 1,375  | 3,399  | 38    | 106.77 | 55.35  | 136.79 | 37     |        |    |
|                               |                 | 1997  | 2,998       | 1,698  | 3,646  | 33    | 112.82 | 63.90  | 137.18 | 36     |        |    |
|                               |                 | 1998  | 3,347       | 2,073  | 4,124  | 33    | 118.42 | 73.34  | 145.92 | 32     |        |    |
|                               |                 | 1999  | 4,135       | 3,601  | 4,653  | 25    | 138.01 | 120.19 | 155.30 | 21     |        |    |
|                               |                 | 2000  | 3,974       | 2,487  | 4,901  | 27    | 125.18 | 78.35  | 154.38 | 29     |        |    |
|                               |                 | 2001  | 4,677       | 4,499  | 4,969  | 24    | 143.43 | 137.97 | 152.40 | 25     |        |    |
|                               |                 | 2002  | 4,176       | 2,319  | 5,096  | 28    | 124.78 | 69.29  | 152.27 | 31     |        |    |
|                               |                 | 2003  | 4,064       | 2,066  | 5,467  | 31    | 117.49 | 59.73  | 158.04 | 39     |        |    |
|                               |                 | 2004  | 3,871       | 1,904  | 5,640  | 35    | 106.78 | 52.51  | 155.56 | 47     |        |    |
|                               |                 | 2005  | 3,456       | 1,659  | 5,436  | 38    | 91.17  | 43.75  | 143.41 | 54     |        |    |
|                               |                 | 2006  | 2,867       | 1,346  | 4,864  | 50    | 72.17  | 33.88  | 122.42 | 73     |        |    |
|                               |                 | 2007  | 2,133       | 986    | 3,896  | 68    | 52.01  | 24.05  | 94.99  | 93     |        |    |
|                               |                 |       | Old (30-64) | 1992   | 11,546 | 8,038 | 14,807 | 33     | 256.36 | 178.47 | 328.76 | 12 |
|                               |                 |       |             | 1993   | 9,371  | 3,377 | 14,095 | 34     | 196.84 | 70.92  | 296.06 | 21 |
|                               |                 |       |             | 1994   | 11,619 | 9,725 | 13,878 | 31     | 224.55 | 187.95 | 268.21 | 14 |
|                               |                 |       |             | 1995   | 10,053 | 4,692 | 13,607 | 28     | 181.11 | 84.52  | 245.12 | 21 |
| 1996                          | 10,403          |       |             | 5,393  | 13,328 | 28    | 176.41 | 91.46  | 226.01 | 21     |        |    |
| 1997                          | 10,924          |       |             | 6,188  | 13,284 | 28    | 172.83 | 97.90  | 210.16 | 20     |        |    |
| 1998                          | 11,188          |       |             | 6,929  | 13,785 | 27    | 167.79 | 103.91 | 206.74 | 19     |        |    |
| 1999                          | 12,630          |       |             | 10,999 | 14,212 | 24    | 180.18 | 156.92 | 202.76 | 13     |        |    |
| 2000                          | 11,130          |       |             | 6,966  | 13,727 | 26    | 150.96 | 94.48  | 186.18 | 21     |        |    |
| 2001                          | 12,123          |       |             | 11,662 | 12,882 | 23    | 157.07 | 151.09 | 166.90 | 19     |        |    |
| 2002                          | 10,150          |       |             | 5,636  | 12,386 | 26    | 126.23 | 70.09  | 154.03 | 28     |        |    |
| 2003                          | 9,394           |       |             | 4,776  | 12,636 | 29    | 112.78 | 57.34  | 151.71 | 35     |        |    |
| 2004                          | 8,607           |       |             | 4,233  | 12,539 | 32    | 98.82  | 48.60  | 143.96 | 42     |        |    |
| 2005                          | 7,420           |       |             | 3,561  | 11,672 | 34    | 82.12  | 39.41  | 129.17 | 52     |        |    |
| 2006                          | 5,883           |       |             | 2,762  | 9,980  | 43    | 62.74  | 29.45  | 106.42 | 65     |        |    |
| 2007                          | 4,065           | 1,880 | 7,425       | 60     | 42.12  | 19.48 | 76.93  | 91     |        |        |        |    |



| Metropolitan Statistical Area      | PWID Population | Year | Number             | Min   | Max    | Rank  | Rate   | Min    | Max    | Rank   |        |    |
|------------------------------------|-----------------|------|--------------------|-------|--------|-------|--------|--------|--------|--------|--------|----|
| Little Rock--North Little Rock, AR | Total           | 1992 | 6,244              | 5,029 | 7,601  | 67    | 177.54 | 143.01 | 216.13 | 21     |        |    |
|                                    |                 | 1993 | 5,499              | 3,824 | 7,148  | 72    | 153.14 | 106.49 | 199.03 | 28     |        |    |
|                                    |                 | 1994 | 5,815              | 4,833 | 6,636  | 72    | 159.99 | 132.96 | 182.58 | 22     |        |    |
|                                    |                 | 1995 | 5,133              | 3,840 | 6,107  | 76    | 139.62 | 104.45 | 166.12 | 33     |        |    |
|                                    |                 | 1996 | 4,954              | 3,813 | 5,811  | 77    | 132.76 | 102.17 | 155.72 | 34     |        |    |
|                                    |                 | 1997 | 4,758              | 3,740 | 5,738  | 81    | 125.65 | 98.76  | 151.53 | 36     |        |    |
|                                    |                 | 1998 | 4,588              | 3,651 | 5,647  | 82    | 119.82 | 95.35  | 147.46 | 41     |        |    |
|                                    |                 | 1999 | 4,727              | 4,163 | 5,588  | 83    | 121.38 | 106.91 | 143.49 | 36     |        |    |
|                                    |                 | 2000 | 4,399              | 3,531 | 5,520  | 83    | 111.27 | 89.31  | 139.63 | 40     |        |    |
|                                    |                 | 2001 | 4,620              | 3,852 | 5,419  | 83    | 115.84 | 96.57  | 135.88 | 41     |        |    |
|                                    |                 | 2002 | 4,218              | 2,807 | 5,322  | 84    | 104.78 | 69.75  | 132.22 | 41     |        |    |
|                                    |                 | 2003 | 4,181              | 2,438 | 5,603  | 85    | 102.82 | 59.96  | 137.79 | 43     |        |    |
|                                    |                 | 2004 | 4,145              | 2,036 | 6,149  | 86    | 100.73 | 49.47  | 149.45 | 43     |        |    |
|                                    |                 | 2005 | 4,112              | 1,620 | 6,717  | 88    | 98.63  | 38.86  | 161.11 | 43     |        |    |
|                                    |                 | 2006 | 4,116              | 1,199 | 7,402  | 88    | 96.99  | 28.26  | 174.41 | 46     |        |    |
|                                    |                 | 2007 | 4,093              | 765   | 8,054  | 86    | 95.39  | 17.84  | 187.71 | 45     |        |    |
|                                    |                 |      | Non-Hispanic White | 1992  | 4,131  | 3,327 | 5,028  | 55     | 149.46 | 120.38 | 181.94 | 20 |
|                                    |                 |      |                    | 1993  | 3,829  | 2,663 | 4,976  | 57     | 136.69 | 95.06  | 177.66 | 23 |
|                                    |                 |      |                    | 1994  | 4,230  | 3,515 | 4,827  | 56     | 150.01 | 124.67 | 171.19 | 17 |
|                                    |                 |      |                    | 1995  | 3,874  | 2,899 | 4,610  | 53     | 136.84 | 102.37 | 162.81 | 19 |
| 1996                               | 3,857           |      |                    | 2,968 | 4,524  | 54    | 135.42 | 104.21 | 158.83 | 18     |        |    |
| 1997                               | 3,799           |      |                    | 2,986 | 4,581  | 56    | 132.23 | 103.93 | 159.46 | 17     |        |    |
| 1998                               | 3,738           |      |                    | 2,974 | 4,600  | 54    | 129.43 | 103.00 | 159.28 | 16     |        |    |
| 1999                               | 3,910           |      |                    | 3,444 | 4,623  | 55    | 133.96 | 117.99 | 158.37 | 18     |        |    |
| 2000                               | 3,679           |      |                    | 2,953 | 4,617  | 56    | 124.85 | 100.21 | 156.67 | 17     |        |    |
| 2001                               | 3,891           |      |                    | 3,244 | 4,564  | 59    | 131.60 | 109.71 | 154.36 | 16     |        |    |
| 2002                               | 3,560           |      |                    | 2,370 | 4,493  | 60    | 120.09 | 79.94  | 151.55 | 17     |        |    |
| 2003                               | 3,522           |      |                    | 2,054 | 4,720  | 62    | 118.13 | 68.89  | 158.31 | 18     |        |    |
| 2004                               | 3,466           |      |                    | 1,702 | 5,143  | 67    | 115.58 | 56.76  | 171.48 | 23     |        |    |
| 2005                               | 3,393           |      |                    | 1,337 | 5,542  | 69    | 112.35 | 44.27  | 183.51 | 25     |        |    |
| 2006                               | 3,325           |      |                    | 969   | 5,980  | 72    | 109.00 | 31.76  | 196.02 | 26     |        |    |
| 2007                               | 3,205           | 599  | 6,307              | 77    | 104.44 | 19.53 | 205.52 | 29     |        |        |        |    |

| Metropolitan Statistical Area      | PWID Population    | Year | Number | Min   | Max   | Rank  | Rate   | Min    | Max    | Rank |
|------------------------------------|--------------------|------|--------|-------|-------|-------|--------|--------|--------|------|
| Little Rock--North Little Rock, AR | Non-Hispanic Black | 1992 | 1,793  | 1,444 | 2,182 | 60    | 264.16 | 212.77 | 321.57 | 56   |
|                                    |                    | 1993 | 1,383  | 962   | 1,798 | 63    | 195.37 | 135.86 | 253.93 | 67   |
|                                    |                    | 1994 | 1,272  | 1,057 | 1,451 | 65    | 175.34 | 145.72 | 200.09 | 77   |
|                                    |                    | 1995 | 972    | 727   | 1,156 | 68    | 130.37 | 97.53  | 155.11 | 87   |
|                                    |                    | 1996 | 811    | 624   | 951   | 75    | 105.25 | 81.00  | 123.46 | 91   |
|                                    |                    | 1997 | 676    | 532   | 816   | 83    | 85.52  | 67.22  | 103.14 | 94   |
|                                    |                    | 1998 | 571    | 454   | 703   | 86    | 70.52  | 56.12  | 86.79  | 95   |
|                                    |                    | 1999 | 522    | 460   | 617   | 86    | 62.74  | 55.26  | 74.17  | 96   |
|                                    |                    | 2000 | 440    | 353   | 552   | 88    | 51.65  | 41.46  | 64.82  | 97   |
|                                    |                    | 2001 | 428    | 356   | 502   | 88    | 49.26  | 41.06  | 57.78  | 98   |
|                                    |                    | 2002 | 372    | 248   | 469   | 91    | 41.91  | 27.90  | 52.89  | 100  |
|                                    |                    | 2003 | 363    | 212   | 486   | 88    | 40.16  | 23.42  | 53.82  | 100  |
|                                    |                    | 2004 | 368    | 181   | 546   | 88    | 39.76  | 19.53  | 58.99  | 100  |
|                                    |                    | 2005 | 389    | 153   | 635   | 88    | 41.08  | 16.19  | 67.10  | 100  |
|                                    |                    | 2006 | 433    | 126   | 779   | 87    | 44.26  | 12.90  | 79.59  | 98   |
|                                    |                    | 2007 | 504    | 94    | 991   | 85    | 50.54  | 9.45   | 99.46  | 94   |
|                                    | Hispanic           | 1992 | 19     | 15    | 23    | 96    | 58.55  | 47.16  | 71.28  | 79   |
|                                    |                    | 1993 | 16     | 11    | 21    | 98    | 44.15  | 30.70  | 57.38  | 87   |
|                                    |                    | 1994 | 17     | 14    | 20    | 99    | 41.64  | 34.61  | 47.52  | 89   |
|                                    |                    | 1995 | 16     | 12    | 19    | 99    | 33.16  | 24.81  | 39.45  | 91   |
|                                    |                    | 1996 | 17     | 13    | 19    | 99    | 28.64  | 22.04  | 33.59  | 92   |
|                                    |                    | 1997 | 18     | 14    | 21    | 98    | 27.68  | 21.76  | 33.39  | 91   |
|                                    |                    | 1998 | 19     | 15    | 24    | 97    | 27.42  | 21.82  | 33.74  | 88   |
|                                    |                    | 1999 | 23     | 20    | 27    | 95    | 29.48  | 25.97  | 34.85  | 87   |
|                                    |                    | 2000 | 25     | 20    | 31    | 95    | 29.32  | 23.53  | 36.79  | 82   |
|                                    |                    | 2001 | 31     | 26    | 37    | 93    | 34.24  | 28.55  | 40.17  | 81   |
|                                    |                    | 2002 | 34     | 23    | 43    | 93    | 34.93  | 23.25  | 44.08  | 76   |
|                                    |                    | 2003 | 40     | 24    | 54    | 92    | 39.26  | 22.90  | 52.62  | 69   |
|                                    |                    | 2004 | 48     | 24    | 71    | 91    | 44.02  | 21.62  | 65.31  | 67   |
| 2005                               | 57                 | 23   | 94     | 89    | 48.44 | 19.09 | 79.12  | 65     |        |      |
| 2006                               | 68                 | 20   | 123    | 89    | 54.20 | 15.79 | 97.46  | 62     |        |      |
| 2007                               | 81                 | 15   | 159    | 88    | 60.01 | 11.22 | 118.10 | 60     |        |      |

| Metropolitan Statistical Area      | PWID Population | Year   | Number | Min   | Max   | Rank   | Rate   | Min    | Max    | Rank  |    |
|------------------------------------|-----------------|--------|--------|-------|-------|--------|--------|--------|--------|-------|----|
| Little Rock--North Little Rock, AR | Male            | 1992   | 5,224  | 4,208 | 6,360 | 56     | 305.68 | 246.21 | 372.11 | 12    |    |
|                                    |                 | 1993   | 4,403  | 3,062 | 5,722 | 61     | 252.19 | 175.38 | 327.78 | 16    |    |
|                                    |                 | 1994   | 4,476  | 3,720 | 5,108 | 61     | 253.03 | 210.28 | 288.74 | 17    |    |
|                                    |                 | 1995   | 3,828  | 2,864 | 4,555 | 68     | 213.64 | 159.84 | 254.20 | 23    |    |
|                                    |                 | 1996   | 3,613  | 2,781 | 4,238 | 71     | 198.37 | 152.66 | 232.67 | 27    |    |
|                                    |                 | 1997   | 3,425  | 2,692 | 4,131 | 75     | 185.13 | 145.51 | 223.26 | 29    |    |
|                                    |                 | 1998   | 3,287  | 2,616 | 4,045 | 76     | 175.58 | 139.72 | 216.07 | 33    |    |
|                                    |                 | 1999   | 3,392  | 2,987 | 4,010 | 77     | 177.94 | 156.73 | 210.36 | 32    |    |
|                                    |                 | 2000   | 3,175  | 2,548 | 3,984 | 78     | 163.97 | 131.60 | 205.75 | 32    |    |
|                                    |                 | 2001   | 3,361  | 2,802 | 3,942 | 78     | 172.21 | 143.56 | 201.99 | 31    |    |
|                                    |                 | 2002   | 3,092  | 2,058 | 3,902 | 79     | 157.03 | 104.52 | 198.16 | 35    |    |
|                                    |                 | 2003   | 3,082  | 1,797 | 4,130 | 78     | 155.08 | 90.45  | 207.83 | 32    |    |
|                                    |                 | 2004   | 3,060  | 1,503 | 4,540 | 82     | 152.07 | 74.69  | 225.63 | 32    |    |
|                                    |                 | 2005   | 3,023  | 1,191 | 4,938 | 82     | 148.28 | 58.43  | 242.20 | 33    |    |
|                                    |                 | 2006   | 2,988  | 871   | 5,373 | 84     | 143.86 | 41.92  | 258.70 | 32    |    |
|                                    | 2007            | 2,901  | 542    | 5,708 | 82    | 138.15 | 25.83  | 271.85 | 35     |       |    |
|                                    |                 | Female | 1992   | 1,025 | 826   | 1,248  | 88     | 56.72  | 45.69  | 69.05 | 65 |
|                                    |                 |        | 1993   | 1,099 | 764   | 1,429  | 85     | 59.57  | 41.42  | 77.42 | 59 |
|                                    |                 |        | 1994   | 1,343 | 1,116 | 1,533  | 85     | 71.99  | 59.83  | 82.15 | 49 |
|                                    |                 |        | 1995   | 1,313 | 982   | 1,562  | 84     | 69.65  | 52.11  | 82.87 | 52 |
|                                    |                 |        | 1996   | 1,355 | 1,043 | 1,590  | 84     | 70.94  | 54.59  | 83.21 | 52 |
|                                    |                 |        | 1997   | 1,354 | 1,064 | 1,633  | 86     | 69.91  | 54.95  | 84.32 | 52 |
|                                    |                 |        | 1998   | 1,329 | 1,057 | 1,635  | 86     | 67.89  | 54.02  | 83.55 | 54 |
|                                    |                 |        | 1999   | 1,369 | 1,206 | 1,619  | 87     | 68.87  | 60.66  | 81.42 | 53 |
|                                    |                 |        | 2000   | 1,259 | 1,010 | 1,580  | 87     | 62.41  | 50.09  | 78.32 | 58 |
|                                    | 2001            |        | 1,295  | 1,080 | 1,519 | 87     | 63.61  | 53.03  | 74.61  | 57    |    |
|                                    | 2002            | 1,154  | 768    | 1,457 | 89    | 56.14  | 37.37  | 70.84  | 65     |       |    |
|                                    | 2003            | 1,118  | 652    | 1,498 | 93    | 53.77  | 31.36  | 72.06  | 66     |       |    |
|                                    | 2004            | 1,089  | 535    | 1,615 | 94    | 51.79  | 25.43  | 76.84  | 69     |       |    |
|                                    | 2005            | 1,072  | 423    | 1,752 | 94    | 50.34  | 19.83  | 82.22  | 69     |       |    |
|                                    | 2006            | 1,082  | 315    | 1,946 | 95    | 49.93  | 14.55  | 89.79  | 71     |       |    |
|                                    | 2007            | 1,107  | 207    | 2,178 | 95    | 50.51  | 9.44   | 99.39  | 71     |       |    |

| Metropolitan Statistical Area      | PWID Population | Year | Number      | Min   | Max   | Rank  | Rate   | Min    | Max    | Rank   |        |    |
|------------------------------------|-----------------|------|-------------|-------|-------|-------|--------|--------|--------|--------|--------|----|
| Little Rock--North Little Rock, AR | Young (15-29)   | 1992 | 2,731       | 2,200 | 3,325 | 41    | 222.70 | 179.38 | 271.10 | 6      |        |    |
|                                    |                 | 1993 | 2,265       | 1,575 | 2,944 | 46    | 183.77 | 127.80 | 238.86 | 8      |        |    |
|                                    |                 | 1994 | 2,291       | 1,904 | 2,614 | 45    | 186.28 | 154.81 | 212.57 | 9      |        |    |
|                                    |                 | 1995 | 1,962       | 1,468 | 2,334 | 52    | 158.92 | 118.90 | 189.09 | 12     |        |    |
|                                    |                 | 1996 | 1,859       | 1,431 | 2,181 | 57    | 148.60 | 114.36 | 174.30 | 13     |        |    |
|                                    |                 | 1997 | 1,770       | 1,391 | 2,135 | 61    | 140.07 | 110.09 | 168.92 | 16     |        |    |
|                                    |                 | 1998 | 1,703       | 1,356 | 2,096 | 64    | 134.11 | 106.72 | 165.05 | 22     |        |    |
|                                    |                 | 1999 | 1,758       | 1,549 | 2,078 | 65    | 137.43 | 121.04 | 162.46 | 22     |        |    |
|                                    |                 | 2000 | 1,640       | 1,317 | 2,058 | 70    | 128.04 | 102.76 | 160.67 | 26     |        |    |
|                                    |                 | 2001 | 1,724       | 1,437 | 2,022 | 73    | 135.74 | 113.16 | 159.22 | 29     |        |    |
|                                    |                 | 2002 | 1,566       | 1,042 | 1,976 | 77    | 123.63 | 82.29  | 156.01 | 32     |        |    |
|                                    |                 | 2003 | 1,532       | 894   | 2,053 | 80    | 120.41 | 70.22  | 161.37 | 34     |        |    |
|                                    |                 | 2004 | 1,482       | 728   | 2,199 | 82    | 115.70 | 56.83  | 171.67 | 38     |        |    |
|                                    |                 | 2005 | 1,413       | 557   | 2,309 | 88    | 109.23 | 43.04  | 178.41 | 42     |        |    |
|                                    |                 | 2006 | 1,334       | 389   | 2,399 | 88    | 101.20 | 29.49  | 181.98 | 47     |        |    |
|                                    |                 | 2007 | 1,222       | 229   | 2,405 | 87    | 92.26  | 17.25  | 181.56 | 52     |        |    |
|                                    |                 |      | Old (30-64) | 1992  | 3,627 | 2,921 | 4,415  | 77     | 158.35 | 127.55 | 192.77 | 38 |
|                                    |                 |      |             | 1993  | 3,299 | 2,294 | 4,287  | 80     | 139.86 | 97.26  | 181.78 | 39 |
|                                    |                 |      |             | 1994  | 3,575 | 2,971 | 4,080  | 78     | 148.67 | 123.55 | 169.65 | 37 |
|                                    |                 |      |             | 1995  | 3,215 | 2,405 | 3,825  | 81     | 131.65 | 98.50  | 156.64 | 39 |
| 1996                               | 3,146           |      |             | 2,421 | 3,690 | 81    | 126.81 | 97.59  | 148.74 | 39     |        |    |
| 1997                               | 3,050           |      |             | 2,397 | 3,678 | 81    | 120.87 | 95.00  | 145.77 | 40     |        |    |
| 1998                               | 2,958           |      |             | 2,354 | 3,641 | 83    | 115.59 | 91.98  | 142.24 | 41     |        |    |
| 1999                               | 3,056           |      |             | 2,691 | 3,612 | 82    | 116.85 | 102.92 | 138.13 | 39     |        |    |
| 2000                               | 2,844           |      |             | 2,283 | 3,569 | 82    | 106.43 | 85.42  | 133.56 | 44     |        |    |
| 2001                               | 2,981           |      |             | 2,485 | 3,497 | 80    | 109.67 | 91.43  | 128.64 | 42     |        |    |
| 2002                               | 2,713           |      |             | 1,806 | 3,423 | 85    | 98.34  | 65.46  | 124.10 | 47     |        |    |
| 2003                               | 2,679           |      |             | 1,562 | 3,590 | 85    | 95.87  | 55.91  | 128.48 | 47     |        |    |
| 2004                               | 2,644           |      |             | 1,299 | 3,923 | 84    | 93.32  | 45.83  | 138.45 | 46     |        |    |
| 2005                               | 2,614           |      |             | 1,030 | 4,269 | 85    | 90.91  | 35.82  | 148.49 | 44     |        |    |
| 2006                               | 2,608           |      |             | 760   | 4,690 | 84    | 89.16  | 25.98  | 160.33 | 44     |        |    |
| 2007                               | 2,587           | 484  | 5,092       | 83    | 87.24 | 16.31 | 171.68 | 42     |        |        |        |    |

| Metropolitan Statistical Area | PWID Population | Year   | Number             | Min    | Max     | Rank   | Rate   | Min    | Max    | Rank  |        |    |
|-------------------------------|-----------------|--------|--------------------|--------|---------|--------|--------|--------|--------|-------|--------|----|
| Los Angeles--Long Beach, CA   | Total           | 1992   | 97,375             | 60,902 | 141,958 | 2      | 160.87 | 100.62 | 234.53 | 26    |        |    |
|                               |                 | 1993   | 106,117            | 60,681 | 141,173 | 2      | 175.67 | 100.45 | 233.70 | 21    |        |    |
|                               |                 | 1994   | 91,225             | 60,320 | 129,242 | 2      | 151.88 | 100.43 | 215.18 | 29    |        |    |
|                               |                 | 1995   | 97,883             | 59,971 | 127,287 | 2      | 163.88 | 100.40 | 213.11 | 20    |        |    |
|                               |                 | 1996   | 94,501             | 59,884 | 120,957 | 2      | 158.01 | 100.13 | 202.25 | 20    |        |    |
|                               |                 | 1997   | 92,145             | 60,493 | 115,788 | 2      | 152.10 | 99.85  | 191.13 | 23    |        |    |
|                               |                 | 1998   | 90,679             | 61,103 | 112,996 | 2      | 147.15 | 99.16  | 183.37 | 24    |        |    |
|                               |                 | 1999   | 83,516             | 61,670 | 111,956 | 2      | 133.33 | 98.46  | 178.74 | 29    |        |    |
|                               |                 | 2000   | 86,946             | 61,154 | 111,728 | 2      | 136.93 | 96.31  | 175.97 | 25    |        |    |
|                               |                 | 2001   | 82,286             | 60,558 | 111,372 | 2      | 127.96 | 94.17  | 173.19 | 30    |        |    |
|                               |                 | 2002   | 82,228             | 59,025 | 114,998 | 2      | 126.37 | 90.71  | 176.73 | 30    |        |    |
|                               |                 | 2003   | 79,951             | 57,300 | 118,389 | 2      | 121.73 | 87.25  | 180.26 | 30    |        |    |
|                               |                 | 2004   | 77,715             | 54,988 | 122,804 | 2      | 117.46 | 83.11  | 185.61 | 29    |        |    |
|                               |                 | 2005   | 75,228             | 51,781 | 126,920 | 2      | 113.19 | 77.91  | 190.96 | 32    |        |    |
|                               |                 | 2006   | 72,479             | 41,544 | 130,944 | 3      | 108.83 | 62.38  | 196.62 | 33    |        |    |
|                               |                 | 2007   | 69,664             | 31,253 | 134,870 | 3      | 104.48 | 46.87  | 202.27 | 38    |        |    |
|                               |                 |        | Non-Hispanic White | 1992   | 34,194  | 21,387 | 49,850 | 1      | 143.06 | 89.48 | 208.56 | 22 |
|                               |                 |        |                    | 1993   | 35,777  | 20,459 | 47,596 | 1      | 154.38 | 88.28 | 205.37 | 15 |
|                               |                 |        |                    | 1994   | 29,635  | 19,596 | 41,985 | 1      | 132.18 | 87.40 | 187.27 | 23 |
|                               |                 |        |                    | 1995   | 30,760  | 18,846 | 40,000 | 1      | 141.47 | 86.67 | 183.97 | 16 |
| 1996                          | 28,853          |        |                    | 18,284 | 36,931  | 2      | 135.58 | 85.92  | 173.54 | 17    |        |    |
| 1997                          | 27,468          |        |                    | 18,032 | 34,515  | 2      | 129.97 | 85.32  | 163.31 | 18    |        |    |
| 1998                          | 26,532          |        |                    | 17,878 | 33,062  | 2      | 125.75 | 84.74  | 156.70 | 18    |        |    |
| 1999                          | 24,128          |        |                    | 17,817 | 32,345  | 3      | 114.62 | 84.64  | 153.65 | 25    |        |    |
| 2000                          | 24,962          |        |                    | 17,557 | 32,077  | 3      | 119.32 | 83.92  | 153.33 | 19    |        |    |
| 2001                          | 23,638          |        |                    | 17,396 | 31,994  | 3      | 113.06 | 83.20  | 153.02 | 25    |        |    |
| 2002                          | 23,808          |        |                    | 17,090 | 33,297  | 4      | 114.11 | 81.91  | 159.58 | 22    |        |    |
| 2003                          | 23,510          |        |                    | 16,849 | 34,813  | 4      | 113.26 | 81.17  | 167.71 | 23    |        |    |
| 2004                          | 23,387          |        |                    | 16,548 | 36,956  | 4      | 113.21 | 80.10  | 178.89 | 24    |        |    |
| 2005                          | 23,347          |        |                    | 16,070 | 39,390  | 3      | 113.89 | 78.39  | 192.15 | 24    |        |    |
| 2006                          | 23,369          |        |                    | 13,395 | 42,219  | 3      | 114.95 | 65.89  | 207.67 | 22    |        |    |
| 2007                          | 23,495          | 10,540 | 45,487             | 3      | 116.72  | 52.36  | 225.97 | 23     |        |       |        |    |

| Metropolitan Statistical Area | PWID Population    | Year   | Number   | Min    | Max    | Rank   | Rate   | Min    | Max    | Rank  |        |    |
|-------------------------------|--------------------|--------|----------|--------|--------|--------|--------|--------|--------|-------|--------|----|
| Los Angeles--Long Beach, CA   | Non-Hispanic Black | 1992   | 16,512   | 10,328 | 24,073 | 6      | 262.11 | 163.94 | 382.12 | 57    |        |    |
|                               |                    | 1993   | 19,586   | 11,200 | 26,056 | 4      | 314.36 | 179.76 | 418.21 | 41    |        |    |
|                               |                    | 1994   | 17,709   | 11,709 | 25,089 | 6      | 287.69 | 190.23 | 407.58 | 46    |        |    |
|                               |                    | 1995   | 19,437   | 11,909 | 25,276 | 3      | 319.60 | 195.81 | 415.60 | 31    |        |    |
|                               |                    | 1996   | 18,777   | 11,899 | 24,034 | 3      | 311.05 | 197.11 | 398.13 | 26    |        |    |
|                               |                    | 1997   | 18,015   | 11,827 | 22,637 | 3      | 297.11 | 195.05 | 373.34 | 24    |        |    |
|                               |                    | 1998   | 17,238   | 11,616 | 21,481 | 3      | 282.56 | 190.40 | 352.10 | 24    |        |    |
|                               |                    | 1999   | 15,334   | 11,323 | 20,556 | 7      | 249.86 | 184.50 | 334.95 | 28    |        |    |
|                               |                    | 2000   | 15,395   | 10,828 | 19,783 | 4      | 251.18 | 176.67 | 322.78 | 23    |        |    |
|                               |                    | 2001   | 14,104   | 10,380 | 19,090 | 7      | 229.49 | 168.89 | 310.61 | 26    |        |    |
|                               |                    | 2002   | 13,772   | 9,886  | 19,261 | 7      | 223.43 | 160.39 | 312.48 | 25    |        |    |
|                               |                    | 2003   | 13,284   | 9,521  | 19,671 | 6      | 215.33 | 154.32 | 318.85 | 27    |        |    |
|                               |                    | 2004   | 13,078   | 9,254  | 20,666 | 7      | 211.67 | 149.77 | 334.48 | 28    |        |    |
|                               |                    | 2005   | 13,163   | 9,060  | 22,208 | 7      | 213.54 | 146.99 | 360.28 | 26    |        |    |
|                               |                    | 2006   | 13,602   | 7,797  | 24,575 | 5      | 221.92 | 127.20 | 400.93 | 24    |        |    |
|                               |                    | 2007   | 14,514   | 6,512  | 28,100 | 4      | 238.31 | 106.91 | 461.36 | 22    |        |    |
|                               |                    |        | Hispanic | 1992   | 35,218 | 22,027 | 51,342 | 2      | 152.88 | 95.62 | 222.87 | 45 |
|                               |                    |        |          | 1993   | 38,358 | 21,934 | 51,029 | 2      | 163.34 | 93.40 | 217.30 | 39 |
|                               |                    |        |          | 1994   | 32,938 | 21,779 | 46,665 | 2      | 138.28 | 91.43 | 195.90 | 40 |
|                               |                    |        |          | 1995   | 35,307 | 21,632 | 45,913 | 2      | 146.55 | 89.79 | 190.57 | 37 |
| 1996                          | 34,082             |        |          | 21,597 | 43,623 | 2      | 138.95 | 88.05  | 177.84 | 37    |        |    |
| 1997                          | 33,277             |        |          | 21,846 | 41,815 | 2      | 132.04 | 86.68  | 165.92 | 37    |        |    |
| 1998                          | 32,864             |        |          | 22,145 | 40,953 | 2      | 126.34 | 85.13  | 157.43 | 37    |        |    |
| 1999                          | 30,465             |        |          | 22,496 | 40,839 | 2      | 113.73 | 83.98  | 152.46 | 37    |        |    |
| 2000                          | 32,038             |        |          | 22,534 | 41,170 | 2      | 116.32 | 81.82  | 149.48 | 37    |        |    |
| 2001                          | 30,763             |        |          | 22,640 | 41,637 | 2      | 109.10 | 80.29  | 147.67 | 39    |        |    |
| 2002                          | 31,347             |        |          | 22,501 | 43,839 | 2      | 108.75 | 78.06  | 152.09 | 37    |        |    |
| 2003                          | 31,258             |        |          | 22,402 | 46,286 | 2      | 106.34 | 76.21  | 157.46 | 37    |        |    |
| 2004                          | 31,359             |        |          | 22,188 | 49,553 | 2      | 105.01 | 74.30  | 165.94 | 36    |        |    |
| 2005                          | 31,545             | 21,713 | 53,220   | 2      | 104.28 | 71.78  | 175.94 | 38     |        |       |        |    |
| 2006                          | 31,808             | 18,232 | 57,466   | 2      | 104.20 | 59.73  | 188.26 | 36     |        |       |        |    |
| 2007                          | 32,224             | 14,456 | 62,385   | 2      | 104.64 | 46.94  | 202.58 | 35     |        |       |        |    |

| Metropolitan Statistical Area | PWID Population | Year   | Number | Min    | Max    | Rank   | Rate   | Min    | Max    | Rank   |    |
|-------------------------------|-----------------|--------|--------|--------|--------|--------|--------|--------|--------|--------|----|
| Los Angeles--Long Beach, CA   | Male            | 1992   | 64,612 | 40,411 | 94,195 | 2      | 210.48 | 131.64 | 306.85 | 29     |    |
|                               |                 | 1993   | 70,990 | 40,595 | 94,442 | 2      | 232.21 | 132.78 | 308.92 | 21     |    |
|                               |                 | 1994   | 61,391 | 40,593 | 86,974 | 2      | 202.33 | 133.78 | 286.64 | 31     |    |
|                               |                 | 1995   | 66,145 | 40,526 | 86,015 | 2      | 219.64 | 134.57 | 285.61 | 19     |    |
|                               |                 | 1996   | 64,038 | 40,580 | 81,966 | 2      | 212.84 | 134.87 | 272.42 | 20     |    |
|                               |                 | 1997   | 62,558 | 41,069 | 78,608 | 2      | 205.71 | 135.05 | 258.49 | 21     |    |
|                               |                 | 1998   | 61,642 | 41,537 | 76,813 | 2      | 199.62 | 134.51 | 248.75 | 21     |    |
|                               |                 | 1999   | 56,836 | 41,969 | 76,191 | 2      | 181.36 | 133.92 | 243.12 | 29     |    |
|                               |                 | 2000   | 59,249 | 41,673 | 76,137 | 2      | 186.59 | 131.24 | 239.77 | 22     |    |
|                               |                 | 2001   | 56,180 | 41,345 | 76,038 | 2      | 174.58 | 128.48 | 236.28 | 27     |    |
|                               |                 | 2002   | 56,300 | 40,413 | 78,737 | 2      | 172.83 | 124.06 | 241.71 | 24     |    |
|                               |                 | 2003   | 54,967 | 39,394 | 81,394 | 2      | 167.20 | 119.83 | 247.58 | 26     |    |
|                               |                 | 2004   | 53,738 | 38,023 | 84,916 | 2      | 162.16 | 114.74 | 256.24 | 25     |    |
|                               |                 | 2005   | 52,418 | 36,081 | 88,437 | 2      | 157.30 | 108.28 | 265.40 | 27     |    |
|                               | 2006            | 51,001 | 29,234 | 92,142 | 2      | 152.74 | 87.55  | 275.95 | 31     |        |    |
|                               | 2007            | 49,621 | 22,261 | 96,066 | 3      | 148.32 | 66.54  | 287.16 | 32     |        |    |
|                               |                 | Female | 1992   | 32,288 | 20,194 | 47,071 | 1      | 108.24 | 67.70  | 157.79 | 28 |
|                               |                 |        | 1993   | 34,996 | 20,012 | 46,557 | 1      | 117.30 | 67.07  | 156.05 | 23 |
|                               |                 |        | 1994   | 29,961 | 19,811 | 42,447 | 2      | 100.81 | 66.66  | 142.82 | 31 |
|                               |                 |        | 1995   | 32,043 | 19,632 | 41,669 | 1      | 108.20 | 66.29  | 140.71 | 22 |
|                               |                 |        | 1996   | 30,846 | 19,547 | 39,482 | 2      | 103.79 | 65.77  | 132.85 | 22 |
|                               |                 |        | 1997   | 29,987 | 19,686 | 37,680 | 2      | 99.39  | 65.25  | 124.89 | 23 |
|                               |                 |        | 1998   | 29,403 | 19,812 | 36,639 | 2      | 95.64  | 64.44  | 119.18 | 23 |
|                               |                 |        | 1999   | 26,952 | 19,902 | 36,130 | 2      | 86.11  | 63.59  | 115.44 | 35 |
|                               |                 |        | 2000   | 27,881 | 19,610 | 35,828 | 2      | 87.84  | 61.78  | 112.88 | 32 |
|                               |                 |        | 2001   | 26,164 | 19,255 | 35,412 | 1      | 81.44  | 59.94  | 110.23 | 39 |
|                               | 2002            |        | 25,855 | 18,559 | 36,159 | 2      | 79.56  | 57.11  | 111.27 | 37     |    |
|                               | 2003            |        | 24,781 | 17,760 | 36,695 | 2      | 75.55  | 54.15  | 111.87 | 41     |    |
|                               | 2004            | 23,656 | 16,738 | 37,381 | 3      | 71.64  | 50.69  | 113.20 | 44     |        |    |
|                               | 2005            | 22,392 | 15,413 | 37,779 | 4      | 67.57  | 46.51  | 114.00 | 49     |        |    |
|                               | 2006            | 20,994 | 12,034 | 37,929 | 4      | 63.22  | 36.24  | 114.22 | 55     |        |    |
|                               | 2007            | 19,530 | 8,762  | 37,811 | 4      | 58.78  | 26.37  | 113.81 | 54     |        |    |

| Metropolitan Statistical Area | PWID Population | Year   | Number      | Min    | Max     | Rank   | Rate    | Min    | Max    | Rank   |        |    |
|-------------------------------|-----------------|--------|-------------|--------|---------|--------|---------|--------|--------|--------|--------|----|
| Los Angeles--Long Beach, CA   | Young (15-29)   | 1992   | 23,030      | 14,404 | 33,574  | 1      | 101.88  | 63.72  | 148.52 | 40     |        |    |
|                               |                 | 1993   | 22,526      | 12,881 | 29,968  | 1      | 101.97  | 58.31  | 135.66 | 42     |        |    |
|                               |                 | 1994   | 17,830      | 11,790 | 25,261  | 2      | 82.71   | 54.69  | 117.18 | 54     |        |    |
|                               |                 | 1995   | 18,029      | 11,046 | 23,444  | 2      | 85.39   | 52.31  | 111.04 | 51     |        |    |
|                               |                 | 1996   | 16,734      | 10,604 | 21,419  | 3      | 80.09   | 50.75  | 102.51 | 54     |        |    |
|                               |                 | 1997   | 15,946      | 10,469 | 20,037  | 3      | 75.97   | 49.87  | 95.46  | 56     |        |    |
|                               |                 | 1998   | 15,526      | 10,462 | 19,347  | 3      | 73.16   | 49.29  | 91.16  | 58     |        |    |
|                               |                 | 1999   | 14,264      | 10,533 | 19,121  | 4      | 66.51   | 49.11  | 89.16  | 65     |        |    |
|                               |                 | 2000   | 14,871      | 10,460 | 19,110  | 4      | 68.61   | 48.26  | 88.17  | 65     |        |    |
|                               |                 | 2001   | 14,090      | 10,369 | 19,070  | 5      | 65.25   | 48.02  | 88.31  | 75     |        |    |
|                               |                 | 2002   | 14,032      | 10,072 | 19,624  | 5      | 65.09   | 46.72  | 91.03  | 74     |        |    |
|                               |                 | 2003   | 13,477      | 9,659  | 19,957  | 5      | 62.61   | 44.87  | 92.70  | 79     |        |    |
|                               |                 | 2004   | 12,773      | 9,038  | 20,184  | 5      | 59.32   | 41.97  | 93.73  | 83     |        |    |
|                               |                 | 2005   | 11,846      | 8,154  | 19,986  | 8      | 54.99   | 37.85  | 92.78  | 94     |        |    |
|                               |                 | 2006   | 10,696      | 6,131  | 19,324  | 8      | 49.65   | 28.46  | 89.71  | 98     |        |    |
|                               |                 | 2007   | 9,379       | 4,208  | 18,157  | 11     | 43.55   | 19.54  | 84.32  | 100    |        |    |
|                               |                 |        | Old (30-64) | 1992   | 76,678  | 47,958 | 111,786 | 2      | 202.19 | 126.46 | 294.77 | 19 |
|                               |                 |        |             | 1993   | 83,748  | 47,890 | 111,415 | 2      | 218.57 | 124.98 | 290.77 | 14 |
|                               |                 |        |             | 1994   | 72,596  | 48,002 | 102,849 | 2      | 188.54 | 124.66 | 267.10 | 19 |
|                               |                 |        |             | 1995   | 78,856  | 48,314 | 102,544 | 2      | 204.21 | 125.11 | 265.55 | 14 |
| 1996                          | 77,210          |        |             | 48,927 | 98,825  | 2      | 198.42  | 125.74 | 253.97 | 13     |        |    |
| 1997                          | 76,343          |        |             | 50,119 | 95,931  | 2      | 192.83  | 126.59 | 242.30 | 13     |        |    |
| 1998                          | 76,057          |        |             | 51,250 | 94,776  | 2      | 188.26  | 126.86 | 234.59 | 12     |        |    |
| 1999                          | 70,716          |        |             | 52,218 | 94,798  | 2      | 171.67  | 126.77 | 230.14 | 15     |        |    |
| 2000                          | 74,045          |        |             | 52,080 | 95,150  | 2      | 177.06  | 124.54 | 227.53 | 12     |        |    |
| 2001                          | 70,160          |        |             | 51,634 | 94,960  | 1      | 164.27  | 120.89 | 222.33 | 15     |        |    |
| 2002                          | 69,800          |        |             | 50,104 | 97,618  | 2      | 160.41  | 115.15 | 224.34 | 15     |        |    |
| 2003                          | 67,079          |        |             | 48,075 | 99,328  | 2      | 151.94  | 108.89 | 224.98 | 16     |        |    |
| 2004                          | 63,800          |        |             | 45,142 | 100,815 | 2      | 142.96  | 101.15 | 225.90 | 15     |        |    |
| 2005                          | 59,532          |        |             | 40,977 | 100,439 | 2      | 132.53  | 91.22  | 223.59 | 19     |        |    |
| 2006                          | 54,000          | 30,953 | 97,560      | 2      | 119.85  | 68.70  | 216.52  | 23     |        |        |        |    |
| 2007                          | 47,026          | 21,097 | 91,043      | 2      | 104.17  | 46.73  | 201.68  | 28     |        |        |        |    |



| Metropolitan Statistical Area | PWID Population | Year  | Number             | Min   | Max    | Rank  | Rate   | Min   | Max    | Rank  |        |    |
|-------------------------------|-----------------|-------|--------------------|-------|--------|-------|--------|-------|--------|-------|--------|----|
| Louisville, KY--IN            | Total           | 1992  | 8,846              | 3,599 | 14,634 | 52    | 137.54 | 55.95 | 227.53 | 41    |        |    |
|                               |                 | 1993  | 7,371              | 2,569 | 14,458 | 56    | 113.53 | 39.58 | 222.70 | 42    |        |    |
|                               |                 | 1994  | 9,051              | 4,358 | 14,202 | 49    | 138.35 | 66.61 | 217.08 | 38    |        |    |
|                               |                 | 1995  | 7,666              | 3,452 | 13,957 | 52    | 116.14 | 52.31 | 211.46 | 42    |        |    |
|                               |                 | 1996  | 7,640              | 3,816 | 13,687 | 49    | 114.91 | 57.40 | 205.84 | 43    |        |    |
|                               |                 | 1997  | 7,474              | 3,440 | 13,371 | 51    | 111.92 | 51.51 | 200.23 | 44    |        |    |
|                               |                 | 1998  | 7,345              | 2,721 | 13,135 | 52    | 109.08 | 40.40 | 195.06 | 45    |        |    |
|                               |                 | 1999  | 8,156              | 2,238 | 12,909 | 52    | 119.98 | 32.92 | 189.89 | 38    |        |    |
|                               |                 | 2000  | 7,237              | 2,084 | 12,424 | 54    | 105.44 | 30.37 | 181.01 | 43    |        |    |
|                               |                 | 2001  | 7,859              | 2,056 | 11,889 | 51    | 113.79 | 29.76 | 172.12 | 43    |        |    |
|                               |                 | 2002  | 6,912              | 1,984 | 11,488 | 56    | 99.44  | 28.54 | 165.27 | 45    |        |    |
|                               |                 | 2003  | 6,741              | 1,825 | 11,089 | 57    | 96.31  | 26.07 | 158.42 | 46    |        |    |
|                               |                 | 2004  | 6,559              | 1,577 | 10,776 | 58    | 92.87  | 22.33 | 152.58 | 49    |        |    |
|                               |                 | 2005  | 6,448              | 1,688 | 10,445 | 65    | 90.59  | 23.71 | 146.75 | 52    |        |    |
|                               |                 | 2006  | 6,515              | 2,452 | 10,449 | 66    | 90.76  | 34.16 | 145.57 | 51    |        |    |
|                               |                 | 2007  | 6,615              | 2,582 | 10,655 | 64    | 91.13  | 35.58 | 146.80 | 51    |        |    |
|                               |                 |       | Non-Hispanic White | 1992  | 5,676  | 2,309 | 9,390  | 43    | 102.76 | 41.80 | 169.99 | 37 |
|                               |                 |       |                    | 1993  | 4,706  | 1,641 | 9,232  | 47    | 84.61  | 29.49 | 165.96 | 40 |
|                               |                 |       |                    | 1994  | 5,739  | 2,763 | 9,004  | 40    | 102.75 | 49.47 | 161.21 | 35 |
|                               |                 |       |                    | 1995  | 4,819  | 2,170 | 8,774  | 44    | 85.83  | 38.66 | 156.27 | 45 |
| 1996                          | 4,757           |       |                    | 2,376 | 8,522  | 45    | 84.44  | 42.18 | 151.27 | 46    |        |    |
| 1997                          | 4,608           |       |                    | 2,121 | 8,244  | 45    | 81.78  | 37.63 | 146.31 | 49    |        |    |
| 1998                          | 4,486           |       |                    | 1,661 | 8,021  | 43    | 79.36  | 29.39 | 141.91 | 49    |        |    |
| 1999                          | 4,937           |       |                    | 1,355 | 7,815  | 42    | 86.98  | 23.87 | 137.68 | 43    |        |    |
| 2000                          | 4,350           |       |                    | 1,253 | 7,468  | 46    | 76.30  | 21.97 | 130.98 | 52    |        |    |
| 2001                          | 4,702           |       |                    | 1,230 | 7,112  | 45    | 82.21  | 21.50 | 124.36 | 47    |        |    |
| 2002                          | 4,128           |       |                    | 1,185 | 6,860  | 47    | 71.93  | 20.64 | 119.55 | 54    |        |    |
| 2003                          | 4,033           |       |                    | 1,092 | 6,634  | 52    | 69.96  | 18.94 | 115.08 | 57    |        |    |
| 2004                          | 3,947           |       |                    | 949   | 6,485  | 58    | 68.18  | 16.40 | 112.02 | 57    |        |    |
| 2005                          | 3,921           |       |                    | 1,026 | 6,352  | 60    | 67.44  | 17.65 | 109.25 | 59    |        |    |
| 2006                          | 4,022           | 1,514 | 6,452              | 59    | 68.74  | 25.87 | 110.26 | 59    |        |       |        |    |
| 2007                          | 4,167           | 1,627 | 6,712              | 57    | 70.76  | 27.63 | 113.99 | 58    |        |       |        |    |

| Metropolitan Statistical Area | PWID Population    | Year | Number   | Min   | Max   | Rank  | Rate   | Min    | Max    | Rank  |        |    |
|-------------------------------|--------------------|------|----------|-------|-------|-------|--------|--------|--------|-------|--------|----|
| Louisville, KY--IN            | Non-Hispanic Black | 1992 | 2,625    | 1,068 | 4,342 | 44    | 326.76 | 132.93 | 540.56 | 45    |        |    |
|                               |                    | 1993 | 2,366    | 825   | 4,640 | 42    | 290.64 | 101.31 | 570.10 | 47    |        |    |
|                               |                    | 1994 | 2,997    | 1,443 | 4,703 | 34    | 360.64 | 173.63 | 565.85 | 27    |        |    |
|                               |                    | 1995 | 2,525    | 1,137 | 4,598 | 37    | 297.36 | 133.93 | 541.43 | 38    |        |    |
|                               |                    | 1996 | 2,433    | 1,215 | 4,358 | 37    | 281.74 | 140.73 | 504.70 | 35    |        |    |
|                               |                    | 1997 | 2,251    | 1,036 | 4,028 | 36    | 256.44 | 118.02 | 458.79 | 36    |        |    |
|                               |                    | 1998 | 2,063    | 764   | 3,690 | 40    | 229.83 | 85.13  | 410.99 | 42    |        |    |
|                               |                    | 1999 | 2,123    | 583   | 3,360 | 40    | 231.42 | 63.51  | 366.28 | 39    |        |    |
|                               |                    | 2000 | 1,750    | 504   | 3,005 | 45    | 187.18 | 53.91  | 321.32 | 46    |        |    |
|                               |                    | 2001 | 1,789    | 468   | 2,707 | 47    | 188.71 | 49.36  | 285.46 | 45    |        |    |
|                               |                    | 2002 | 1,517    | 435   | 2,521 | 54    | 157.85 | 45.30  | 262.34 | 53    |        |    |
|                               |                    | 2003 | 1,475    | 399   | 2,427 | 55    | 151.88 | 41.12  | 249.82 | 53    |        |    |
|                               |                    | 2004 | 1,496    | 360   | 2,457 | 53    | 150.13 | 36.10  | 246.64 | 53    |        |    |
|                               |                    | 2005 | 1,612    | 422   | 2,612 | 46    | 158.59 | 41.51  | 256.91 | 46    |        |    |
|                               |                    | 2006 | 1,884    | 709   | 3,022 | 35    | 182.70 | 68.77  | 293.04 | 40    |        |    |
|                               |                    | 2007 | 2,322    | 906   | 3,740 | 31    | 219.11 | 85.54  | 352.95 | 28    |        |    |
|                               |                    |      | Hispanic | 1992  | 53    | 22    | 88     | 85     | 117.39 | 47.76 | 194.21 | 55 |
|                               |                    |      |          | 1993  | 47    | 17    | 93     | 86     | 92.72  | 32.32 | 181.87 | 57 |
|                               |                    |      |          | 1994  | 62    | 30    | 97     | 84     | 110.32 | 53.11 | 173.10 | 54 |
|                               |                    |      |          | 1995  | 55    | 25    | 100    | 85     | 88.74  | 39.97 | 161.57 | 54 |
| 1996                          | 57                 |      |          | 29    | 102   | 85    | 81.74  | 40.83  | 146.43 | 54    |        |    |
| 1997                          | 58                 |      |          | 27    | 103   | 85    | 73.17  | 33.67  | 130.91 | 57    |        |    |
| 1998                          | 58                 |      |          | 22    | 104   | 86    | 64.57  | 23.92  | 115.46 | 60    |        |    |
| 1999                          | 66                 |      |          | 18    | 104   | 86    | 63.57  | 17.45  | 100.62 | 63    |        |    |
| 2000                          | 59                 |      |          | 17    | 101   | 87    | 50.50  | 14.54  | 86.70  | 67    |        |    |
| 2001                          | 64                 |      |          | 17    | 97    | 89    | 51.01  | 13.34  | 77.16  | 67    |        |    |
| 2002                          | 57                 |      |          | 16    | 94    | 89    | 42.24  | 12.12  | 70.20  | 69    |        |    |
| 2003                          | 55                 |      |          | 15    | 90    | 89    | 38.85  | 10.52  | 63.90  | 72    |        |    |
| 2004                          | 53                 |      |          | 13    | 88    | 89    | 35.71  | 8.59   | 58.67  | 73    |        |    |
| 2005                          | 52                 |      |          | 14    | 84    | 91    | 33.29  | 8.71   | 53.93  | 75    |        |    |
| 2006                          | 53                 | 20   | 84       | 91    | 32.44 | 12.21 | 52.04  | 77     |        |       |        |    |
| 2007                          | 53                 | 21   | 86       | 91    | 30.88 | 12.06 | 49.75  | 79     |        |       |        |    |

| Metropolitan Statistical Area | PWID Population | Year   | Number | Min   | Max   | Rank   | Rate   | Min    | Max    | Rank   |    |
|-------------------------------|-----------------|--------|--------|-------|-------|--------|--------|--------|--------|--------|----|
| Louisville, KY--IN            | Male            | 1992   | 5,396  | 2,195 | 8,926 | 55     | 172.45 | 70.15  | 285.29 | 38     |    |
|                               |                 | 1993   | 4,726  | 1,647 | 9,271 | 54     | 149.65 | 52.16  | 293.54 | 43     |    |
|                               |                 | 1994   | 5,987  | 2,883 | 9,394 | 46     | 187.78 | 90.40  | 294.62 | 33     |    |
|                               |                 | 1995   | 5,158  | 2,323 | 9,392 | 47     | 160.09 | 72.10  | 291.49 | 39     |    |
|                               |                 | 1996   | 5,174  | 2,584 | 9,269 | 47     | 159.25 | 79.54  | 285.28 | 38     |    |
|                               |                 | 1997   | 5,051  | 2,324 | 9,036 | 46     | 154.59 | 71.14  | 276.57 | 41     |    |
|                               |                 | 1998   | 4,922  | 1,823 | 8,802 | 51     | 149.17 | 55.25  | 266.75 | 43     |    |
|                               |                 | 1999   | 5,393  | 1,480 | 8,536 | 49     | 161.54 | 44.33  | 255.68 | 35     |    |
|                               |                 | 2000   | 4,709  | 1,356 | 8,083 | 51     | 139.52 | 40.18  | 239.50 | 42     |    |
|                               |                 | 2001   | 5,027  | 1,315 | 7,604 | 52     | 147.82 | 38.66  | 223.61 | 37     |    |
|                               |                 | 2002   | 4,351  | 1,249 | 7,231 | 58     | 127.07 | 36.47  | 211.19 | 42     |    |
|                               |                 | 2003   | 4,192  | 1,135 | 6,895 | 58     | 121.68 | 32.94  | 200.16 | 46     |    |
|                               |                 | 2004   | 4,055  | 975   | 6,661 | 60     | 116.31 | 27.97  | 191.08 | 52     |    |
|                               |                 | 2005   | 3,998  | 1,046 | 6,476 | 61     | 113.71 | 29.76  | 184.20 | 54     |    |
|                               |                 | 2006   | 4,095  | 1,541 | 6,569 | 61     | 115.67 | 43.54  | 185.53 | 49     |    |
|                               | 2007            | 4,269  | 1,667  | 6,877 | 59    | 118.97 | 46.45  | 191.65 | 46     |        |    |
|                               |                 | Female | 1992   | 3,636 | 1,479 | 6,015  | 40     | 110.08 | 44.78  | 182.11 | 26 |
|                               |                 |        | 1993   | 2,818 | 982   | 5,527  | 48     | 84.51  | 29.46  | 165.77 | 38 |
|                               |                 |        | 1994   | 3,292 | 1,585 | 5,166  | 44     | 98.18  | 47.27  | 154.04 | 33 |
|                               |                 |        | 1995   | 2,711 | 1,221 | 4,935  | 52     | 80.24  | 36.14  | 146.09 | 42 |
|                               |                 |        | 1996   | 2,676 | 1,337 | 4,794  | 52     | 78.70  | 39.31  | 140.99 | 43 |
|                               |                 |        | 1997   | 2,632 | 1,211 | 4,709  | 54     | 77.18  | 35.52  | 138.08 | 47 |
|                               |                 |        | 1998   | 2,631 | 974   | 4,704  | 57     | 76.59  | 28.37  | 136.97 | 46 |
|                               |                 |        | 1999   | 2,991 | 821   | 4,734  | 53     | 86.46  | 23.73  | 136.85 | 34 |
|                               |                 |        | 2000   | 2,726 | 785   | 4,680  | 54     | 78.16  | 22.51  | 134.17 | 45 |
|                               | 2001            |        | 3,040  | 795   | 4,598 | 53     | 86.68  | 22.67  | 131.12 | 35     |    |
|                               | 2002            | 2,733  | 784    | 4,542 | 53    | 77.48  | 22.24  | 128.77 | 39     |        |    |
|                               | 2003            | 2,704  | 732    | 4,447 | 55    | 76.06  | 20.59  | 125.11 | 38     |        |    |
|                               | 2004            | 2,640  | 635    | 4,337 | 60    | 73.81  | 17.75  | 121.27 | 41     |        |    |
|                               | 2005            | 2,567  | 672    | 4,158 | 60    | 71.25  | 18.65  | 115.42 | 44     |        |    |
|                               | 2006            | 2,518  | 948    | 4,039 | 63    | 69.23  | 26.06  | 111.04 | 43     |        |    |
|                               | 2007            | 2,427  | 947    | 3,909 | 62    | 66.12  | 25.81  | 106.51 | 47     |        |    |

| Metropolitan Statistical Area | PWID Population | Year        | Number | Min   | Max    | Rank   | Rate   | Min    | Max    | Rank   |    |
|-------------------------------|-----------------|-------------|--------|-------|--------|--------|--------|--------|--------|--------|----|
| Louisville, KY--IN            | Young (15-29)   | 1992        | 1,678  | 683   | 2,776  | 67     | 80.84  | 32.89  | 133.73 | 55     |    |
|                               |                 | 1993        | 1,264  | 441   | 2,480  | 75     | 61.50  | 21.44  | 120.64 | 62     |    |
|                               |                 | 1994        | 1,462  | 704   | 2,295  | 74     | 71.52  | 34.43  | 112.22 | 58     |    |
|                               |                 | 1995        | 1,211  | 545   | 2,205  | 76     | 59.28  | 26.70  | 107.94 | 63     |    |
|                               |                 | 1996        | 1,219  | 609   | 2,184  | 75     | 59.68  | 29.81  | 106.91 | 63     |    |
|                               |                 | 1997        | 1,239  | 570   | 2,217  | 76     | 60.62  | 27.90  | 108.45 | 63     |    |
|                               |                 | 1998        | 1,294  | 479   | 2,313  | 75     | 63.22  | 23.42  | 113.05 | 62     |    |
|                               |                 | 1999        | 1,552  | 426   | 2,456  | 75     | 75.96  | 20.84  | 120.23 | 61     |    |
|                               |                 | 2000        | 1,505  | 433   | 2,583  | 76     | 74.09  | 21.34  | 127.19 | 60     |    |
|                               |                 | 2001        | 1,796  | 470   | 2,716  | 72     | 89.49  | 23.40  | 135.36 | 54     |    |
|                               |                 | 2002        | 1,737  | 498   | 2,886  | 73     | 86.94  | 24.95  | 144.49 | 54     |    |
|                               |                 | 2003        | 1,855  | 502   | 3,051  | 72     | 92.88  | 25.14  | 152.78 | 55     |    |
|                               |                 | 2004        | 1,960  | 471   | 3,220  | 69     | 97.20  | 23.37  | 159.68 | 54     |    |
|                               |                 | 2005        | 2,068  | 541   | 3,349  | 72     | 101.94 | 26.68  | 165.14 | 51     |    |
|                               |                 | 2006        | 2,208  | 831   | 3,541  | 67     | 108.24 | 40.74  | 173.61 | 41     |    |
|                               | 2007            | 2,327       | 908    | 3,748 | 60     | 112.08 | 43.75  | 180.54 | 38     |        |    |
|                               |                 | Old (30-64) | 1992   | 7,289 | 2,965  | 12,058 | 47     | 167.32 | 68.07  | 276.80 | 33 |
|                               |                 |             | 1993   | 6,226 | 2,170  | 12,212 | 46     | 140.33 | 48.92  | 275.27 | 38 |
|                               |                 |             | 1994   | 7,757 | 3,735  | 12,171 | 42     | 172.48 | 83.04  | 270.62 | 27 |
|                               |                 |             | 1995   | 6,616 | 2,980  | 12,047 | 44     | 145.17 | 65.38  | 264.31 | 34 |
|                               |                 |             | 1996   | 6,602 | 3,298  | 11,828 | 44     | 143.34 | 71.60  | 256.78 | 34 |
|                               | 1997            |             | 6,432  | 2,960 | 11,508 | 45     | 138.81 | 63.88  | 248.34 | 34     |    |
|                               | 1998            |             | 6,264  | 2,320 | 11,201 | 45     | 133.62 | 49.49  | 238.94 | 35     |    |
|                               | 1999            |             | 6,855  | 1,881 | 10,849 | 43     | 144.16 | 39.56  | 228.16 | 29     |    |
|                               | 2000            |             | 5,961  | 1,717 | 10,233 | 45     | 123.35 | 35.52  | 211.74 | 37     |    |
|                               | 2001            |             | 6,306  | 1,649 | 9,539  | 46     | 128.68 | 33.66  | 194.66 | 33     |    |
|                               | 2002            | 5,368       | 1,541  | 8,921 | 48     | 108.37 | 31.10  | 180.11 | 38     |        |    |
|                               | 2003            | 5,034       | 1,363  | 8,281 | 53     | 100.63 | 27.24  | 165.53 | 44     |        |    |
|                               | 2004            | 4,680       | 1,125  | 7,689 | 56     | 92.75  | 22.30  | 152.38 | 47     |        |    |
|                               | 2005            | 4,371       | 1,144  | 7,080 | 59     | 85.87  | 22.48  | 139.10 | 49     |        |    |
|                               | 2006            | 4,175       | 1,572  | 6,697 | 61     | 81.26  | 30.58  | 130.33 | 49     |        |    |
|                               | 2007            | 3,998       | 1,561  | 6,440 | 61     | 77.14  | 30.12  | 124.26 | 51     |        |    |

| Metropolitan Statistical Area | PWID Population | Year  | Number             | Min   | Max    | Rank  | Rate  | Min   | Max    | Rank  |       |    |
|-------------------------------|-----------------|-------|--------------------|-------|--------|-------|-------|-------|--------|-------|-------|----|
| Memphis, TN--AR--MS           | Total           | 1992  | 4,822              | 3,155 | 5,868  | 78    | 70.89 | 46.38 | 86.28  | 80    |       |    |
|                               |                 | 1993  | 4,826              | 3,077 | 6,102  | 78    | 70.27 | 44.80 | 88.85  | 76    |       |    |
|                               |                 | 1994  | 4,946              | 3,034 | 6,384  | 78    | 70.98 | 43.54 | 91.62  | 82    |       |    |
|                               |                 | 1995  | 4,842              | 2,992 | 6,680  | 79    | 68.42 | 42.28 | 94.39  | 75    |       |    |
|                               |                 | 1996  | 4,865              | 2,977 | 6,977  | 79    | 67.76 | 41.46 | 97.18  | 76    |       |    |
|                               |                 | 1997  | 4,883              | 2,952 | 7,260  | 79    | 67.24 | 40.64 | 99.97  | 73    |       |    |
|                               |                 | 1998  | 4,924              | 2,965 | 7,587  | 80    | 66.94 | 40.31 | 103.13 | 70    |       |    |
|                               |                 | 1999  | 5,438              | 2,982 | 7,929  | 75    | 72.91 | 39.98 | 106.30 | 70    |       |    |
|                               |                 | 2000  | 5,089              | 3,142 | 8,313  | 78    | 67.38 | 41.60 | 110.07 | 68    |       |    |
|                               |                 | 2001  | 5,769              | 3,288 | 8,662  | 74    | 75.82 | 43.22 | 113.84 | 67    |       |    |
|                               |                 | 2002  | 5,257              | 3,235 | 9,012  | 76    | 68.47 | 42.13 | 117.38 | 68    |       |    |
|                               |                 | 2003  | 5,349              | 3,099 | 9,373  | 75    | 69.01 | 39.99 | 120.92 | 69    |       |    |
|                               |                 | 2004  | 5,457              | 2,993 | 9,735  | 74    | 69.63 | 38.20 | 124.23 | 69    |       |    |
|                               |                 | 2005  | 5,562              | 2,867 | 10,103 | 74    | 70.21 | 36.19 | 127.53 | 69    |       |    |
|                               |                 | 2006  | 5,694              | 2,750 | 10,525 | 73    | 70.79 | 34.18 | 130.84 | 68    |       |    |
|                               |                 | 2007  | 5,240              | 5,240 | 5,240  | 77    | 64.63 | 64.63 | 64.63  | 72    |       |    |
|                               |                 |       | Non-Hispanic White | 1992  | 2,001  | 1,309 | 2,436 | 83    | 50.35  | 32.94 | 61.27 | 73 |
|                               |                 |       |                    | 1993  | 2,047  | 1,305 | 2,588 | 80    | 51.63  | 32.91 | 65.28 | 65 |
|                               |                 |       |                    | 1994  | 2,155  | 1,322 | 2,781 | 80    | 54.14  | 33.21 | 69.88 | 68 |
|                               |                 |       |                    | 1995  | 2,176  | 1,344 | 3,001 | 78    | 54.41  | 33.62 | 75.06 | 62 |
| 1996                          | 2,260           |       |                    | 1,383 | 3,241  | 78    | 56.38 | 34.49 | 80.85  | 62    |       |    |
| 1997                          | 2,349           |       |                    | 1,420 | 3,493  | 78    | 58.57 | 35.40 | 87.09  | 61    |       |    |
| 1998                          | 2,454           |       |                    | 1,478 | 3,781  | 78    | 61.10 | 36.79 | 94.14  | 60    |       |    |
| 1999                          | 2,806           |       |                    | 1,538 | 4,091  | 76    | 69.67 | 38.20 | 101.58 | 58    |       |    |
| 2000                          | 2,714           |       |                    | 1,675 | 4,434  | 76    | 67.26 | 41.53 | 109.88 | 57    |       |    |
| 2001                          | 3,174           |       |                    | 1,809 | 4,765  | 69    | 78.85 | 44.94 | 118.39 | 52    |       |    |
| 2002                          | 2,974           |       |                    | 1,830 | 5,099  | 72    | 74.01 | 45.54 | 126.87 | 53    |       |    |
| 2003                          | 3,102           |       |                    | 1,798 | 5,436  | 71    | 77.25 | 44.76 | 135.36 | 48    |       |    |
| 2004                          | 3,232           |       |                    | 1,773 | 5,765  | 71    | 80.56 | 44.19 | 143.72 | 45    |       |    |
| 2005                          | 3,349           |       |                    | 1,726 | 6,083  | 71    | 83.50 | 43.04 | 151.67 | 45    |       |    |
| 2006                          | 3,470           |       |                    | 1,675 | 6,413  | 71    | 86.25 | 41.65 | 159.42 | 42    |       |    |
| 2007                          | 3,215           | 3,215 | 3,215              | 76    | 80.30  | 80.30 | 80.30 | 45    |        |       |       |    |

| Metropolitan Statistical Area | PWID Population    | Year | Number   | Min   | Max   | Rank  | Rate  | Min   | Max    | Rank  |       |    |
|-------------------------------|--------------------|------|----------|-------|-------|-------|-------|-------|--------|-------|-------|----|
| Memphis, TN--AR--MS           | Non-Hispanic Black | 1992 | 2,258    | 1,477 | 2,748 | 48    | 84.37 | 55.20 | 102.68 | 99    |       |    |
|                               |                    | 1993 | 2,233    | 1,424 | 2,824 | 45    | 81.58 | 52.01 | 103.15 | 99    |       |    |
|                               |                    | 1994 | 2,237    | 1,372 | 2,888 | 46    | 79.80 | 48.95 | 103.00 | 98    |       |    |
|                               |                    | 1995 | 2,120    | 1,310 | 2,925 | 42    | 73.83 | 45.62 | 101.85 | 98    |       |    |
|                               |                    | 1996 | 2,046    | 1,252 | 2,935 | 44    | 69.61 | 42.59 | 99.84  | 98    |       |    |
|                               |                    | 1997 | 1,961    | 1,185 | 2,915 | 46    | 65.40 | 39.53 | 97.24  | 96    |       |    |
|                               |                    | 1998 | 1,879    | 1,132 | 2,895 | 47    | 61.45 | 37.00 | 94.68  | 96    |       |    |
|                               |                    | 1999 | 1,968    | 1,079 | 2,870 | 44    | 63.08 | 34.59 | 91.97  | 95    |       |    |
|                               |                    | 2000 | 1,749    | 1,080 | 2,857 | 46    | 55.13 | 34.03 | 90.06  | 95    |       |    |
|                               |                    | 2001 | 1,889    | 1,077 | 2,837 | 43    | 58.63 | 33.42 | 88.03  | 94    |       |    |
|                               |                    | 2002 | 1,653    | 1,017 | 2,833 | 48    | 50.39 | 31.00 | 86.38  | 95    |       |    |
|                               |                    | 2003 | 1,632    | 946   | 2,859 | 46    | 48.82 | 28.29 | 85.54  | 96    |       |    |
|                               |                    | 2004 | 1,639    | 899   | 2,924 | 45    | 48.02 | 26.34 | 85.67  | 96    |       |    |
|                               |                    | 2005 | 1,674    | 863   | 3,040 | 43    | 48.11 | 24.80 | 87.39  | 96    |       |    |
|                               |                    | 2006 | 1,753    | 846   | 3,240 | 40    | 49.16 | 23.74 | 90.86  | 94    |       |    |
|                               |                    | 2007 | 1,687    | 1,687 | 1,687 | 50    | 46.47 | 46.47 | 46.47  | 95    |       |    |
|                               |                    |      | Hispanic | 1992  | 34    | 22    | 42    | 89    | 49.54  | 32.41 | 60.30 | 87 |
|                               |                    |      |          | 1993  | 35    | 23    | 45    | 88    | 45.68  | 29.12 | 57.76 | 84 |
|                               |                    |      |          | 1994  | 37    | 23    | 48    | 91    | 41.80  | 25.64 | 53.95 | 88 |
|                               |                    |      |          | 1995  | 36    | 22    | 50    | 89    | 35.65  | 22.03 | 49.18 | 88 |
| 1996                          | 36                 |      |          | 22    | 52    | 89    | 30.78 | 18.83 | 44.14  | 89    |       |    |
| 1997                          | 36                 |      |          | 22    | 53    | 89    | 26.84 | 16.22 | 39.90  | 92    |       |    |
| 1998                          | 36                 |      |          | 21    | 55    | 92    | 22.98 | 13.84 | 35.41  | 92    |       |    |
| 1999                          | 39                 |      |          | 21    | 57    | 92    | 22.03 | 12.08 | 32.12  | 92    |       |    |
| 2000                          | 36                 |      |          | 22    | 59    | 92    | 17.95 | 11.08 | 29.32  | 93    |       |    |
| 2001                          | 40                 |      |          | 23    | 61    | 92    | 19.29 | 10.99 | 28.96  | 92    |       |    |
| 2002                          | 37                 |      |          | 23    | 63    | 92    | 16.78 | 10.33 | 28.77  | 94    |       |    |
| 2003                          | 38                 |      |          | 22    | 67    | 93    | 16.77 | 9.72  | 29.39  | 94    |       |    |
| 2004                          | 41                 |      |          | 22    | 73    | 93    | 16.89 | 9.26  | 30.13  | 94    |       |    |
| 2005                          | 44                 |      |          | 23    | 80    | 92    | 17.35 | 8.95  | 31.52  | 95    |       |    |
| 2006                          | 49                 |      |          | 24    | 91    | 92    | 18.24 | 8.81  | 33.71  | 95    |       |    |
| 2007                          | 51                 | 51   | 51       | 93    | 18.02 | 18.02 | 18.02 | 94    |        |       |       |    |

| Metropolitan Statistical Area | PWID Population | Year   | Number | Min   | Max   | Rank  | Rate   | Min    | Max    | Rank   |    |
|-------------------------------|-----------------|--------|--------|-------|-------|-------|--------|--------|--------|--------|----|
| Memphis, TN--AR--MS           | Male            | 1992   | 3,285  | 2,149 | 3,998 | 79    | 100.46 | 65.73  | 122.26 | 79     |    |
|                               |                 | 1993   | 3,272  | 2,086 | 4,137 | 77    | 99.09  | 63.17  | 125.29 | 73     |    |
|                               |                 | 1994   | 3,323  | 2,038 | 4,289 | 79    | 99.13  | 60.80  | 127.94 | 78     |    |
|                               |                 | 1995   | 3,210  | 1,983 | 4,428 | 79    | 94.26  | 58.24  | 130.02 | 73     |    |
|                               |                 | 1996   | 3,171  | 1,940 | 4,547 | 79    | 91.71  | 56.11  | 131.53 | 75     |    |
|                               |                 | 1997   | 3,120  | 1,886 | 4,639 | 81    | 89.18  | 53.90  | 132.59 | 74     |    |
|                               |                 | 1998   | 3,077  | 1,853 | 4,741 | 82    | 86.77  | 52.25  | 133.69 | 72     |    |
|                               |                 | 1999   | 3,319  | 1,820 | 4,839 | 78    | 92.13  | 50.51  | 134.32 | 71     |    |
|                               |                 | 2000   | 3,030  | 1,871 | 4,951 | 83    | 82.98  | 51.23  | 135.57 | 71     |    |
|                               |                 | 2001   | 3,354  | 1,911 | 5,035 | 80    | 91.18  | 51.97  | 136.89 | 67     |    |
|                               |                 | 2002   | 2,988  | 1,838 | 5,122 | 82    | 80.54  | 49.56  | 138.06 | 72     |    |
|                               |                 | 2003   | 2,980  | 1,727 | 5,222 | 83    | 79.65  | 46.15  | 139.55 | 73     |    |
|                               |                 | 2004   | 2,992  | 1,641 | 5,338 | 84    | 78.96  | 43.31  | 140.86 | 73     |    |
|                               |                 | 2005   | 3,019  | 1,556 | 5,483 | 83    | 78.78  | 40.60  | 143.09 | 74     |    |
|                               | 2006            | 3,079  | 1,487  | 5,692 | 80    | 79.27 | 38.28  | 146.52 | 74     |        |    |
|                               | 2007            | 2,846  | 2,846  | 2,846 | 84    | 72.63 | 72.63  | 72.63  | 79     |        |    |
|                               |                 | Female | 1992   | 1,627 | 1,065 | 1,980 | 74     | 46.07  | 30.14  | 56.07  | 80 |
|                               |                 |        | 1993   | 1,634 | 1,042 | 2,066 | 76     | 45.83  | 29.22  | 57.95  | 78 |
|                               |                 |        | 1994   | 1,708 | 1,047 | 2,204 | 76     | 47.22  | 28.96  | 60.95  | 82 |
|                               |                 |        | 1995   | 1,726 | 1,067 | 2,381 | 77     | 47.01  | 29.05  | 64.85  | 78 |
|                               |                 |        | 1996   | 1,807 | 1,105 | 2,591 | 77     | 48.53  | 29.70  | 69.61  | 76 |
|                               |                 |        | 1997   | 1,899 | 1,148 | 2,824 | 76     | 50.46  | 30.50  | 75.02  | 72 |
|                               |                 |        | 1998   | 2,009 | 1,210 | 3,096 | 72     | 52.74  | 31.76  | 81.26  | 68 |
|                               |                 |        | 1999   | 2,326 | 1,275 | 3,391 | 66     | 60.30  | 33.06  | 87.92  | 60 |
|                               |                 |        | 2000   | 2,272 | 1,402 | 3,711 | 65     | 58.24  | 35.95  | 95.14  | 61 |
|                               |                 |        | 2001   | 2,672 | 1,523 | 4,012 | 60     | 67.98  | 38.75  | 102.07 | 54 |
|                               | 2002            |        | 2,505  | 1,542 | 4,295 | 60    | 63.14  | 38.85  | 108.24 | 58     |    |
|                               | 2003            |        | 2,597  | 1,505 | 4,550 | 58    | 64.76  | 37.53  | 113.48 | 57     |    |
|                               | 2004            | 2,666  | 1,462  | 4,756 | 58    | 65.89 | 36.14  | 117.54 | 52     |        |    |
|                               | 2005            | 2,696  | 1,390  | 4,897 | 58    | 65.93 | 33.98  | 119.75 | 52     |        |    |
|                               | 2006            | 2,692  | 1,300  | 4,976 | 57    | 64.73 | 31.26  | 119.65 | 52     |        |    |
|                               | 2007            | 2,366  | 2,366  | 2,366 | 65    | 56.49 | 56.49  | 56.49  | 61     |        |    |

| Metropolitan Statistical Area | PWID Population | Year        | Number | Min   | Max   | Rank  | Rate  | Min   | Max    | Rank   |    |
|-------------------------------|-----------------|-------------|--------|-------|-------|-------|-------|-------|--------|--------|----|
| Memphis, TN--AR--MS           | Young (15-29)   | 1992        | 1,585  | 1,037 | 1,928 | 71    | 65.87 | 43.09 | 80.16  | 66     |    |
|                               |                 | 1993        | 1,350  | 861   | 1,707 | 73    | 56.53 | 36.04 | 71.47  | 67     |    |
|                               |                 | 1994        | 1,233  | 756   | 1,591 | 76    | 51.65 | 31.68 | 66.66  | 76     |    |
|                               |                 | 1995        | 1,125  | 695   | 1,552 | 78    | 47.01 | 29.05 | 64.85  | 78     |    |
|                               |                 | 1996        | 1,100  | 673   | 1,578 | 79    | 45.68 | 27.95 | 65.52  | 83     |    |
|                               |                 | 1997        | 1,114  | 673   | 1,656 | 80    | 46.13 | 27.88 | 68.59  | 78     |    |
|                               |                 | 1998        | 1,167  | 703   | 1,798 | 80    | 47.98 | 28.89 | 73.93  | 79     |    |
|                               |                 | 1999        | 1,367  | 750   | 1,993 | 80    | 55.99 | 30.70 | 81.63  | 78     |    |
|                               |                 | 2000        | 1,376  | 849   | 2,247 | 79    | 56.27 | 34.74 | 91.93  | 74     |    |
|                               |                 | 2001        | 1,686  | 961   | 2,532 | 75    | 69.66 | 39.70 | 104.59 | 69     |    |
|                               |                 | 2002        | 1,659  | 1,021 | 2,843 | 75    | 68.82 | 42.35 | 117.98 | 71     |    |
|                               |                 | 2003        | 1,807  | 1,047 | 3,167 | 73    | 74.79 | 43.34 | 131.05 | 67     |    |
|                               |                 | 2004        | 1,948  | 1,069 | 3,475 | 72    | 79.77 | 43.75 | 142.31 | 63     |    |
|                               |                 | 2005        | 2,060  | 1,062 | 3,741 | 73    | 83.64 | 43.11 | 151.92 | 64     |    |
|                               |                 | 2006        | 2,137  | 1,032 | 3,950 | 68    | 85.68 | 41.37 | 158.36 | 58     |    |
|                               | 2007            | 1,938       | 1,938  | 1,938 | 73    | 77.00 | 77.00 | 77.00 | 66     |        |    |
|                               |                 | Old (30-64) | 1992   | 3,305 | 2,162 | 4,022 | 81    | 75.19 | 49.19  | 91.50  | 87 |
|                               |                 |             | 1993   | 3,519 | 2,244 | 4,450 | 78    | 78.56 | 50.08  | 99.33  | 78 |
|                               |                 |             | 1994   | 3,758 | 2,305 | 4,851 | 77    | 82.03 | 50.31  | 105.88 | 79 |
|                               |                 |             | 1995   | 3,778 | 2,334 | 5,212 | 76    | 80.67 | 49.85  | 111.28 | 72 |
|                               |                 |             | 1996   | 3,855 | 2,359 | 5,529 | 75    | 80.79 | 49.43  | 115.86 | 72 |
| 1997                          |                 |             | 3,896  | 2,355 | 5,792 | 74    | 80.36 | 48.57 | 119.48 | 68     |    |
| 1998                          |                 |             | 3,926  | 2,364 | 6,049 | 72    | 79.72 | 48.01 | 122.83 | 67     |    |
| 1999                          |                 |             | 4,303  | 2,359 | 6,274 | 71    | 85.77 | 47.03 | 125.06 | 61     |    |
| 2000                          |                 |             | 3,970  | 2,451 | 6,485 | 71    | 77.71 | 47.98 | 126.95 | 61     |    |
| 2001                          |                 |             | 4,407  | 2,512 | 6,617 | 69    | 84.94 | 48.41 | 127.53 | 60     |    |
| 2002                          |                 |             | 3,905  | 2,403 | 6,694 | 69    | 74.13 | 45.61 | 127.08 | 61     |    |
| 2003                          |                 |             | 3,836  | 2,223 | 6,721 | 71    | 71.90 | 41.66 | 125.98 | 62     |    |
| 2004                          |                 |             | 3,749  | 2,056 | 6,689 | 72    | 69.51 | 38.12 | 124.00 | 62     |    |
| 2005                          |                 |             | 3,633  | 1,873 | 6,599 | 73    | 66.55 | 34.30 | 120.89 | 63     |    |
| 2006                          |                 |             | 3,509  | 1,694 | 6,486 | 74    | 63.23 | 30.53 | 116.87 | 64     |    |
| 2007                          | 3,024           | 3,024       | 3,024  | 75    | 54.09 | 54.09 | 54.09 | 71    |        |        |    |



| Metropolitan Statistical Area | PWID Population | Year  | Number             | Min   | Max    | Rank  | Rate   | Min   | Max    | Rank  |        |    |
|-------------------------------|-----------------|-------|--------------------|-------|--------|-------|--------|-------|--------|-------|--------|----|
| Miami, FL                     | Total           | 1992  | 20,559             | 6,141 | 31,324 | 23    | 156.15 | 46.64 | 237.92 | 29    |        |    |
|                               |                 | 1993  | 14,635             | 3,415 | 26,974 | 29    | 111.62 | 26.05 | 205.74 | 44    |        |    |
|                               |                 | 1994  | 16,576             | 5,551 | 23,202 | 27    | 124.34 | 41.64 | 174.04 | 42    |        |    |
|                               |                 | 1995  | 12,084             | 3,663 | 19,951 | 33    | 88.68  | 26.88 | 146.42 | 55    |        |    |
|                               |                 | 1996  | 10,905             | 3,813 | 17,484 | 36    | 78.17  | 27.33 | 125.33 | 66    |        |    |
|                               |                 | 1997  | 9,898              | 3,928 | 15,746 | 40    | 69.88  | 27.73 | 111.17 | 71    |        |    |
|                               |                 | 1998  | 9,185              | 4,034 | 13,982 | 43    | 64.06  | 28.13 | 97.52  | 76    |        |    |
|                               |                 | 1999  | 10,405             | 7,726 | 12,754 | 39    | 71.09  | 52.78 | 87.13  | 73    |        |    |
|                               |                 | 2000  | 8,536              | 4,436 | 11,606 | 47    | 57.14  | 29.69 | 77.69  | 80    |        |    |
|                               |                 | 2001  | 9,437              | 7,858 | 10,878 | 45    | 62.36  | 51.92 | 71.87  | 78    |        |    |
|                               |                 | 2002  | 8,221              | 5,094 | 11,351 | 48    | 53.68  | 33.26 | 74.11  | 84    |        |    |
|                               |                 | 2003  | 8,352              | 5,407 | 13,084 | 48    | 54.13  | 35.04 | 84.79  | 85    |        |    |
|                               |                 | 2004  | 8,647              | 4,814 | 15,126 | 48    | 55.53  | 30.92 | 97.14  | 84    |        |    |
|                               |                 | 2005  | 8,662              | 4,086 | 15,925 | 48    | 55.14  | 26.01 | 101.38 | 86    |        |    |
|                               |                 | 2006  | 8,194              | 3,449 | 14,650 | 50    | 51.76  | 21.78 | 92.54  | 94    |        |    |
|                               |                 | 2007  | 7,607              | 2,795 | 12,942 | 52    | 48.00  | 17.64 | 81.67  | 96    |        |    |
|                               |                 |       | Non-Hispanic White | 1992  | 7,428  | 2,219 | 11,318 | 31    | 213.70 | 63.83 | 325.60 | 7  |
|                               |                 |       |                    | 1993  | 5,469  | 1,276 | 10,080 | 39    | 164.61 | 38.41 | 303.41 | 13 |
|                               |                 |       |                    | 1994  | 6,247  | 2,092 | 8,744  | 35    | 191.75 | 64.22 | 268.39 | 9  |
|                               |                 |       |                    | 1995  | 4,506  | 1,366 | 7,440  | 49    | 140.99 | 42.74 | 232.79 | 18 |
| 1996                          | 3,968           |       |                    | 1,387 | 6,363  | 52    | 126.56 | 44.25 | 202.92 | 19    |        |    |
| 1997                          | 3,485           |       |                    | 1,383 | 5,544  | 62    | 113.47 | 45.03 | 180.51 | 22    |        |    |
| 1998                          | 3,117           |       |                    | 1,369 | 4,746  | 68    | 103.72 | 45.55 | 157.91 | 31    |        |    |
| 1999                          | 3,412           |       |                    | 2,533 | 4,182  | 67    | 115.65 | 85.87 | 141.75 | 24    |        |    |
| 2000                          | 2,726           |       |                    | 1,417 | 3,707  | 75    | 94.11  | 48.90 | 127.95 | 34    |        |    |
| 2001                          | 2,978           |       |                    | 2,480 | 3,433  | 75    | 103.11 | 85.85 | 118.85 | 32    |        |    |
| 2002                          | 2,616           |       |                    | 1,621 | 3,613  | 76    | 91.00  | 56.38 | 125.64 | 37    |        |    |
| 2003                          | 2,750           |       |                    | 1,780 | 4,307  | 76    | 96.37  | 62.39 | 150.96 | 35    |        |    |
| 2004                          | 3,031           |       |                    | 1,688 | 5,302  | 74    | 106.34 | 59.20 | 186.03 | 29    |        |    |
| 2005                          | 3,331           |       |                    | 1,571 | 6,123  | 72    | 117.05 | 55.21 | 215.20 | 22    |        |    |
| 2006                          | 3,550           | 1,494 | 6,348              | 68    | 125.05 | 52.63 | 223.58 | 19    |        |       |        |    |
| 2007                          | 3,789           | 1,392 | 6,447              | 63    | 135.33 | 49.72 | 230.25 | 12    |        |       |        |    |

| Metropolitan Statistical Area | PWID Population    | Year | Number   | Min   | Max    | Rank  | Rate   | Min    | Max    | Rank  |       |    |
|-------------------------------|--------------------|------|----------|-------|--------|-------|--------|--------|--------|-------|-------|----|
| Miami, FL                     | Non-Hispanic Black | 1992 | 9,731    | 2,906 | 14,827 | 11    | 387.58 | 115.77 | 590.55 | 32    |       |    |
|                               |                    | 1993 | 6,358    | 1,483 | 11,718 | 16    | 253.51 | 59.15  | 467.26 | 52    |       |    |
|                               |                    | 1994 | 6,722    | 2,251 | 9,409  | 15    | 261.61 | 87.61  | 366.17 | 54    |       |    |
|                               |                    | 1995 | 4,649    | 1,409 | 7,676  | 21    | 176.49 | 53.50  | 291.41 | 68    |       |    |
|                               |                    | 1996 | 4,037    | 1,411 | 6,473  | 23    | 149.76 | 52.36  | 240.12 | 78    |       |    |
|                               |                    | 1997 | 3,566    | 1,415 | 5,673  | 24    | 129.42 | 51.36  | 205.88 | 79    |       |    |
|                               |                    | 1998 | 3,246    | 1,426 | 4,942  | 24    | 115.62 | 50.77  | 176.01 | 82    |       |    |
|                               |                    | 1999 | 3,623    | 2,690 | 4,441  | 23    | 126.14 | 93.66  | 154.61 | 82    |       |    |
|                               |                    | 2000 | 2,930    | 1,523 | 3,984  | 24    | 100.79 | 52.37  | 137.04 | 84    |       |    |
|                               |                    | 2001 | 3,182    | 2,649 | 3,668  | 23    | 109.26 | 90.97  | 125.94 | 81    |       |    |
|                               |                    | 2002 | 2,702    | 1,674 | 3,731  | 24    | 92.42  | 57.27  | 127.61 | 84    |       |    |
|                               |                    | 2003 | 2,645    | 1,712 | 4,143  | 26    | 90.46  | 58.56  | 141.70 | 84    |       |    |
|                               |                    | 2004 | 2,596    | 1,445 | 4,541  | 27    | 88.40  | 49.22  | 154.65 | 81    |       |    |
|                               |                    | 2005 | 2,414    | 1,139 | 4,438  | 29    | 81.89  | 38.62  | 150.55 | 82    |       |    |
|                               |                    | 2006 | 2,068    | 870   | 3,697  | 34    | 70.00  | 29.46  | 125.14 | 88    |       |    |
|                               |                    | 2007 | 1,687    | 620   | 2,870  | 50    | 57.70  | 21.20  | 98.17  | 92    |       |    |
|                               |                    |      | Hispanic | 1992  | 4,302  | 1,285 | 6,555  | 18     | 61.81  | 18.46 | 94.18 | 77 |
|                               |                    |      |          | 1993  | 3,247  | 758   | 5,984  | 23     | 46.02  | 10.74 | 84.83 | 83 |
|                               |                    |      |          | 1994  | 3,903  | 1,307 | 5,463  | 19     | 53.71  | 17.99 | 75.17 | 80 |
|                               |                    |      |          | 1995  | 3,015  | 914   | 4,977  | 27     | 39.94  | 12.11 | 65.94 | 86 |
| 1996                          | 2,870              |      |          | 1,004 | 4,602  | 27    | 36.51  | 12.76  | 58.54  | 86    |       |    |
| 1997                          | 2,731              |      |          | 1,084 | 4,345  | 26    | 33.83  | 13.43  | 53.82  | 85    |       |    |
| 1998                          | 2,634              |      |          | 1,157 | 4,010  | 27    | 31.91  | 14.01  | 48.58  | 85    |       |    |
| 1999                          | 3,070              |      |          | 2,279 | 3,762  | 26    | 35.96  | 26.70  | 44.07  | 82    |       |    |
| 2000                          | 2,559              |      |          | 1,330 | 3,479  | 27    | 28.91  | 15.03  | 39.31  | 83    |       |    |
| 2001                          | 2,835              |      |          | 2,360 | 3,268  | 27    | 31.34  | 26.09  | 36.12  | 83    |       |    |
| 2002                          | 2,435              |      |          | 1,509 | 3,362  | 27    | 26.39  | 16.35  | 36.43  | 85    |       |    |
| 2003                          | 2,394              |      |          | 1,550 | 3,751  | 28    | 25.58  | 16.56  | 40.07  | 87    |       |    |
| 2004                          | 2,348              |      |          | 1,307 | 4,107  | 29    | 24.74  | 13.77  | 43.27  | 88    |       |    |
| 2005                          | 2,173              |      |          | 1,025 | 3,994  | 34    | 22.59  | 10.65  | 41.53  | 89    |       |    |
| 2006                          | 1,844              | 776  | 3,297    | 35    | 18.93  | 7.97  | 33.85  | 93     |        |       |       |    |
| 2007                          | 1,486              | 546  | 2,528    | 42    | 15.12  | 5.56  | 25.73  | 95     |        |       |       |    |

| Metropolitan Statistical Area | PWID Population | Year   | Number | Min   | Max    | Rank   | Rate   | Min    | Max    | Rank   |    |
|-------------------------------|-----------------|--------|--------|-------|--------|--------|--------|--------|--------|--------|----|
| Miami, FL                     | Male            | 1992   | 13,178 | 3,936 | 20,079 | 22     | 205.08 | 61.26  | 312.48 | 31     |    |
|                               |                 | 1993   | 9,638  | 2,249 | 17,765 | 31     | 150.72 | 35.17  | 277.80 | 42     |    |
|                               |                 | 1994   | 11,113 | 3,722 | 15,555 | 27     | 170.80 | 57.20  | 239.07 | 36     |    |
|                               |                 | 1995   | 8,188  | 2,482 | 13,519 | 33     | 123.08 | 37.31  | 203.21 | 52     |    |
|                               |                 | 1996   | 7,427  | 2,597 | 11,908 | 34     | 108.94 | 38.09  | 174.67 | 60     |    |
|                               |                 | 1997   | 6,747  | 2,677 | 10,732 | 38     | 97.48  | 38.68  | 155.06 | 65     |    |
|                               |                 | 1998   | 6,246  | 2,743 | 9,508  | 40     | 89.12  | 39.14  | 135.68 | 71     |    |
|                               |                 | 1999   | 7,046  | 5,231 | 8,636  | 35     | 98.40  | 73.06  | 120.61 | 66     |    |
|                               |                 | 2000   | 5,750  | 2,988 | 7,818  | 42     | 78.61  | 40.85  | 106.87 | 75     |    |
|                               |                 | 2001   | 6,327  | 5,268 | 7,292  | 41     | 85.32  | 71.04  | 98.34  | 75     |    |
|                               |                 | 2002   | 5,493  | 3,404 | 7,585  | 44     | 73.16  | 45.33  | 101.02 | 78     |    |
|                               |                 | 2003   | 5,578  | 3,611 | 8,737  | 44     | 73.68  | 47.69  | 115.41 | 77     |    |
|                               |                 | 2004   | 5,794  | 3,226 | 10,136 | 44     | 75.78  | 42.19  | 132.56 | 77     |    |
|                               |                 | 2005   | 5,853  | 2,761 | 10,761 | 44     | 75.82  | 35.76  | 139.40 | 78     |    |
|                               |                 | 2006   | 5,617  | 2,364 | 10,043 | 47     | 72.19  | 30.38  | 129.06 | 81     |    |
|                               | 2007            | 5,324  | 1,956  | 9,058 | 48     | 68.27  | 25.08  | 116.16 | 86     |        |    |
|                               |                 | Female | 1992   | 7,158 | 2,138  | 10,906 | 20     | 106.20 | 31.72  | 161.81 | 31 |
|                               |                 |        | 1993   | 4,914 | 1,147  | 9,057  | 28     | 73.17  | 17.07  | 134.86 | 45 |
|                               |                 |        | 1994   | 5,424 | 1,816  | 7,592  | 27     | 79.48  | 26.62  | 111.25 | 43 |
|                               |                 |        | 1995   | 3,888 | 1,179  | 6,420  | 37     | 55.77  | 16.90  | 92.07  | 63 |
|                               |                 |        | 1996   | 3,478 | 1,216  | 5,577  | 39     | 48.77  | 17.05  | 78.19  | 75 |
|                               |                 |        | 1997   | 3,150 | 1,250  | 5,010  | 45     | 43.48  | 17.26  | 69.17  | 80 |
|                               |                 |        | 1998   | 2,929 | 1,286  | 4,459  | 48     | 39.96  | 17.55  | 60.84  | 86 |
|                               |                 |        | 1999   | 3,337 | 2,477  | 4,090  | 44     | 44.62  | 33.13  | 54.69  | 87 |
|                               |                 |        | 2000   | 2,756 | 1,432  | 3,747  | 53     | 36.16  | 18.79  | 49.16  | 92 |
|                               | 2001            |        | 3,068  | 2,555 | 3,536  | 52     | 39.75  | 33.09  | 45.81  | 88     |    |
|                               | 2002            | 2,687  | 1,665  | 3,710 | 54     | 34.41  | 21.32  | 47.51  | 93     |        |    |
|                               | 2003            | 2,735  | 1,770  | 4,284 | 53     | 34.79  | 22.52  | 54.51  | 94     |        |    |
|                               | 2004            | 2,823  | 1,572  | 4,939 | 53     | 35.62  | 19.83  | 62.32  | 95     |        |    |
|                               | 2005            | 2,802  | 1,322  | 5,152 | 54     | 35.08  | 16.55  | 64.50  | 95     |        |    |
|                               | 2006            | 2,606  | 1,097  | 4,659 | 58     | 32.37  | 13.63  | 57.88  | 97     |        |    |
|                               | 2007            | 2,355  | 865    | 4,007 | 66     | 29.26  | 10.75  | 49.79  | 98     |        |    |

| Metropolitan Statistical Area | PWID Population | Year        | Number | Min    | Max    | Rank   | Rate  | Min    | Max    | Rank   |    |
|-------------------------------|-----------------|-------------|--------|--------|--------|--------|-------|--------|--------|--------|----|
| Miami, FL                     | Young (15-29)   | 1992        | 4,197  | 1,253  | 6,394  | 29     | 95.33 | 28.47  | 145.25 | 44     |    |
|                               |                 | 1993        | 3,001  | 700    | 5,532  | 38     | 69.80 | 16.29  | 128.66 | 57     |    |
|                               |                 | 1994        | 3,475  | 1,164  | 4,864  | 32     | 80.85 | 27.08  | 113.17 | 55     |    |
|                               |                 | 1995        | 2,626  | 796    | 4,335  | 40     | 60.59 | 18.37  | 100.05 | 61     |    |
|                               |                 | 1996        | 2,481  | 867    | 3,978  | 41     | 56.56 | 19.78  | 90.69  | 66     |    |
|                               |                 | 1997        | 2,374  | 942    | 3,776  | 45     | 53.53 | 21.24  | 85.15  | 69     |    |
|                               |                 | 1998        | 2,328  | 1,023  | 3,545  | 47     | 51.97 | 22.82  | 79.12  | 75     |    |
|                               |                 | 1999        | 2,788  | 2,070  | 3,418  | 42     | 61.05 | 45.32  | 74.82  | 68     |    |
|                               |                 | 2000        | 2,410  | 1,252  | 3,277  | 48     | 51.98 | 27.01  | 70.67  | 79     |    |
|                               |                 | 2001        | 2,790  | 2,323  | 3,216  | 47     | 60.25 | 50.16  | 69.44  | 78     |    |
|                               |                 | 2002        | 2,522  | 1,563  | 3,483  | 49     | 54.67 | 33.88  | 75.49  | 81     |    |
|                               |                 | 2003        | 2,630  | 1,702  | 4,120  | 48     | 57.22 | 37.04  | 89.63  | 82     |    |
|                               |                 | 2004        | 2,755  | 1,534  | 4,820  | 49     | 59.92 | 33.36  | 104.82 | 81     |    |
|                               |                 | 2005        | 2,748  | 1,296  | 5,052  | 52     | 59.39 | 28.01  | 109.19 | 85     |    |
|                               |                 | 2006        | 2,539  | 1,068  | 4,539  | 58     | 54.45 | 22.92  | 97.35  | 93     |    |
|                               | 2007            | 2,250       | 827    | 3,828  | 63     | 48.19  | 17.70 | 81.99  | 99     |        |    |
|                               |                 | Old (30-64) | 1992   | 16,542 | 4,941  | 25,205 | 17    | 188.76 | 56.38  | 287.61 | 26 |
|                               |                 |             | 1993   | 11,714 | 2,733  | 21,591 | 28    | 132.95 | 31.02  | 245.04 | 41 |
|                               |                 |             | 1994   | 13,158 | 4,407  | 18,418 | 23    | 145.68 | 48.79  | 203.90 | 39 |
|                               |                 |             | 1995   | 9,487  | 2,876  | 15,664 | 33    | 102.10 | 30.95  | 168.57 | 53 |
|                               |                 |             | 1996   | 8,447  | 2,953  | 13,543 | 36    | 88.32  | 30.88  | 141.61 | 63 |
|                               | 1997            |             | 7,547  | 2,995  | 12,005 | 38     | 77.56 | 30.78  | 123.38 | 72     |    |
|                               | 1998            |             | 6,878  | 3,021  | 10,471 | 43     | 69.78 | 30.64  | 106.23 | 74     |    |
|                               | 1999            |             | 7,642  | 5,674  | 9,367  | 40     | 75.89 | 56.35  | 93.02  | 74     |    |
|                               | 2000            |             | 6,142  | 3,192  | 8,351  | 43     | 59.62 | 30.98  | 81.07  | 81     |    |
|                               | 2001            |             | 6,653  | 5,539  | 7,668  | 44     | 63.34 | 52.73  | 73.00  | 80     |    |
|                               | 2002            | 5,684       | 3,522  | 7,849  | 47     | 53.11  | 32.91 | 73.33  | 85     |        |    |
|                               | 2003            | 5,678       | 3,676  | 8,895  | 47     | 52.41  | 33.93 | 82.10  | 83     |        |    |
|                               | 2004            | 5,802       | 3,230  | 10,149 | 46     | 52.87  | 29.44 | 92.49  | 79     |        |    |
|                               | 2005            | 5,765       | 2,719  | 10,599 | 46     | 52.03  | 24.54 | 95.65  | 79     |        |    |
|                               | 2006            | 5,443       | 2,291  | 9,731  | 47     | 48.73  | 20.51 | 87.13  | 84     |        |    |
|                               | 2007            | 5,076       | 1,865  | 8,636  | 47     | 45.41  | 16.68 | 77.26  | 86     |        |    |

| Metropolitan Statistical Area      | PWID Population | Year  | Number             | Min   | Max   | Rank  | Rate   | Min   | Max    | Rank  |       |    |
|------------------------------------|-----------------|-------|--------------------|-------|-------|-------|--------|-------|--------|-------|-------|----|
| Middlesex--Somerset--Hunterdon, NJ | Total           | 1992  | 5,581              | 3,293 | 7,654 | 71    | 77.07  | 45.47 | 105.69 | 74    |       |    |
|                                    |                 | 1993  | 5,459              | 3,547 | 7,143 | 73    | 74.91  | 48.67 | 98.01  | 71    |       |    |
|                                    |                 | 1994  | 5,305              | 3,828 | 6,633 | 76    | 72.29  | 52.15 | 90.38  | 80    |       |    |
|                                    |                 | 1995  | 5,229              | 4,119 | 6,162 | 73    | 70.64  | 55.64 | 83.25  | 73    |       |    |
|                                    |                 | 1996  | 5,151              | 4,421 | 5,743 | 74    | 68.79  | 59.04 | 76.69  | 73    |       |    |
|                                    |                 | 1997  | 5,101              | 4,747 | 5,370 | 76    | 67.10  | 62.44 | 70.64  | 74    |       |    |
|                                    |                 | 1998  | 5,086              | 5,006 | 5,164 | 76    | 65.96  | 64.92 | 66.97  | 73    |       |    |
|                                    |                 | 1999  | 5,068              | 4,686 | 5,579 | 81    | 64.81  | 59.93 | 71.35  | 78    |       |    |
|                                    |                 | 2000  | 5,100              | 4,380 | 5,707 | 77    | 64.28  | 55.20 | 71.93  | 72    |       |    |
|                                    |                 | 2001  | 5,066              | 4,089 | 5,831 | 81    | 62.99  | 50.85 | 72.50  | 76    |       |    |
|                                    |                 | 2002  | 5,158              | 3,810 | 5,692 | 77    | 63.41  | 46.83 | 69.98  | 74    |       |    |
|                                    |                 | 2003  | 5,170              | 3,540 | 6,100 | 76    | 63.01  | 43.14 | 74.34  | 75    |       |    |
|                                    |                 | 2004  | 5,168              | 3,289 | 6,530 | 77    | 62.42  | 39.74 | 78.89  | 76    |       |    |
|                                    |                 | 2005  | 5,177              | 3,059 | 6,973 | 78    | 61.94  | 36.60 | 83.43  | 76    |       |    |
|                                    |                 | 2006  | 5,162              | 2,824 | 7,408 | 79    | 61.56  | 33.68 | 88.35  | 75    |       |    |
|                                    |                 | 2007  | 5,172              | 2,600 | 7,879 | 79    | 61.23  | 30.78 | 93.26  | 76    |       |    |
|                                    |                 |       | Non-Hispanic White | 1992  | 3,382 | 1,995 | 4,638  | 66    | 60.10  | 35.46 | 82.43 | 63 |
|                                    |                 |       |                    | 1993  | 3,198 | 2,077 | 4,184  | 65    | 57.44  | 37.32 | 75.15 | 62 |
|                                    |                 |       |                    | 1994  | 3,042 | 2,195 | 3,804  | 69    | 55.18  | 39.81 | 68.99 | 64 |
|                                    |                 |       |                    | 1995  | 2,971 | 2,340 | 3,501  | 67    | 54.36  | 42.82 | 64.07 | 63 |
| 1996                               | 2,930           |       |                    | 2,515 | 3,267 | 68    | 53.98  | 46.33 | 60.17  | 65    |       |    |
| 1997                               | 2,931           |       |                    | 2,727 | 3,085 | 71    | 54.16  | 50.40 | 57.02  | 65    |       |    |
| 1998                               | 2,971           |       |                    | 2,924 | 3,016 | 72    | 55.11  | 54.24 | 55.95  | 64    |       |    |
| 1999                               | 3,024           |       |                    | 2,796 | 3,329 | 74    | 56.37  | 52.12 | 62.05  | 67    |       |    |
| 2000                               | 3,117           |       |                    | 2,677 | 3,487 | 68    | 58.29  | 50.06 | 65.23  | 64    |       |    |
| 2001                               | 3,173           |       |                    | 2,562 | 3,653 | 71    | 59.65  | 48.15 | 68.66  | 65    |       |    |
| 2002                               | 3,311           |       |                    | 2,445 | 3,654 | 65    | 62.63  | 46.26 | 69.12  | 62    |       |    |
| 2003                               | 3,394           |       |                    | 2,324 | 4,004 | 67    | 64.72  | 44.31 | 76.35  | 61    |       |    |
| 2004                               | 3,458           |       |                    | 2,201 | 4,370 | 68    | 66.34  | 42.23 | 83.83  | 61    |       |    |
| 2005                               | 3,518           |       |                    | 2,079 | 4,739 | 67    | 67.90  | 40.12 | 91.46  | 58    |       |    |
| 2006                               | 3,546           |       |                    | 1,940 | 5,088 | 69    | 69.06  | 37.78 | 99.10  | 58    |       |    |
| 2007                               | 3,570           | 1,795 | 5,439              | 69    | 70.05 | 35.21 | 106.70 | 59    |        |       |       |    |

| Metropolitan Statistical Area      | PWID Population    | Year | Number   | Min  | Max   | Rank  | Rate   | Min    | Max    | Rank  |        |    |
|------------------------------------|--------------------|------|----------|------|-------|-------|--------|--------|--------|-------|--------|----|
| Middlesex--Somerset--Hunterdon, NJ | Non-Hispanic Black | 1992 | 1,233    | 727  | 1,691 | 69    | 237.58 | 140.17 | 325.84 | 64    |        |    |
|                                    |                    | 1993 | 1,232    | 800  | 1,612 | 66    | 230.84 | 149.97 | 302.02 | 54    |        |    |
|                                    |                    | 1994 | 1,186    | 855  | 1,482 | 67    | 215.53 | 155.50 | 269.48 | 66    |        |    |
|                                    |                    | 1995 | 1,127    | 888  | 1,329 | 66    | 199.00 | 156.76 | 234.54 | 62    |        |    |
|                                    |                    | 1996 | 1,050    | 901  | 1,170 | 67    | 179.65 | 154.19 | 200.27 | 67    |        |    |
|                                    |                    | 1997 | 967      | 900  | 1,018 | 66    | 160.30 | 149.18 | 168.76 | 71    |        |    |
|                                    |                    | 1998 | 887      | 873  | 901   | 66    | 142.77 | 140.51 | 144.95 | 74    |        |    |
|                                    |                    | 1999 | 810      | 749  | 892   | 70    | 127.26 | 117.67 | 140.10 | 80    |        |    |
|                                    |                    | 2000 | 748      | 643  | 837   | 72    | 114.91 | 98.68  | 128.58 | 77    |        |    |
|                                    |                    | 2001 | 688      | 555  | 792   | 74    | 102.72 | 82.92  | 118.24 | 84    |        |    |
|                                    |                    | 2002 | 659      | 487  | 727   | 74    | 96.13  | 71.00  | 106.09 | 81    |        |    |
|                                    |                    | 2003 | 636      | 435  | 750   | 75    | 90.68  | 62.08  | 106.98 | 83    |        |    |
|                                    |                    | 2004 | 630      | 401  | 796   | 76    | 87.74  | 55.85  | 110.88 | 82    |        |    |
|                                    |                    | 2005 | 650      | 384  | 875   | 76    | 88.82  | 52.48  | 119.64 | 79    |        |    |
|                                    |                    | 2006 | 697      | 381  | 1,000 | 76    | 93.36  | 51.07  | 133.97 | 76    |        |    |
|                                    |                    | 2007 | 789      | 397  | 1,202 | 75    | 103.57 | 52.07  | 157.77 | 72    |        |    |
|                                    |                    |      | Hispanic | 1992 | 837   | 494   | 1,148  | 42     | 143.48 | 84.65 | 196.78 | 46 |
|                                    |                    |      |          | 1993 | 807   | 524   | 1,056  | 44     | 129.96 | 84.43 | 170.04 | 43 |
|                                    |                    |      |          | 1994 | 779   | 562   | 974    | 44     | 118.27 | 85.33 | 147.87 | 48 |
|                                    |                    |      |          | 1995 | 767   | 605   | 904    | 46     | 109.66 | 86.38 | 129.24 | 47 |
| 1996                               | 759                |      |          | 651  | 846   | 46    | 101.90 | 87.46  | 113.60 | 47    |        |    |
| 1997                               | 756                |      |          | 704  | 796   | 47    | 95.40  | 88.78  | 100.43 | 48    |        |    |
| 1998                               | 759                |      |          | 747  | 771   | 48    | 90.48  | 89.05  | 91.86  | 51    |        |    |
| 1999                               | 762                |      |          | 705  | 839   | 48    | 86.30  | 79.80  | 95.00  | 52    |        |    |
| 2000                               | 772                |      |          | 663  | 863   | 48    | 83.10  | 71.37  | 92.99  | 48    |        |    |
| 2001                               | 769                |      |          | 620  | 885   | 51    | 78.60  | 63.45  | 90.47  | 56    |        |    |
| 2002                               | 782                |      |          | 578  | 863   | 51    | 76.31  | 56.37  | 84.22  | 51    |        |    |
| 2003                               | 779                |      |          | 533  | 919   | 52    | 72.78  | 49.83  | 85.87  | 53    |        |    |
| 2004                               | 770                |      |          | 490  | 973   | 52    | 69.31  | 44.12  | 87.58  | 55    |        |    |
| 2005                               | 757                |      |          | 447  | 1,019 | 53    | 65.48  | 38.69  | 88.20  | 57    |        |    |
| 2006                               | 735                | 402  | 1,055    | 54   | 61.64 | 33.72 | 88.46  | 60     |        |       |        |    |
| 2007                               | 712                | 358  | 1,084    | 57   | 57.86 | 29.09 | 88.13  | 61     |        |       |        |    |

| Metropolitan Statistical Area      | PWID Population | Year   | Number | Min   | Max   | Rank  | Rate   | Min    | Max    | Rank  |    |
|------------------------------------|-----------------|--------|--------|-------|-------|-------|--------|--------|--------|-------|----|
| Middlesex--Somerset--Hunterdon, NJ | Male            | 1992   | 3,809  | 2,247 | 5,224 | 71    | 105.38 | 62.17  | 144.52 | 73    |    |
|                                    |                 | 1993   | 3,654  | 2,374 | 4,781 | 71    | 100.49 | 65.29  | 131.48 | 69    |    |
|                                    |                 | 1994   | 3,488  | 2,517 | 4,361 | 77    | 95.31  | 68.76  | 119.17 | 82    |    |
|                                    |                 | 1995   | 3,384  | 2,666 | 3,988 | 75    | 91.70  | 72.24  | 108.08 | 75    |    |
|                                    |                 | 1996   | 3,288  | 2,822 | 3,666 | 76    | 88.12  | 75.64  | 98.24  | 76    |    |
|                                    |                 | 1997   | 3,218  | 2,994 | 3,387 | 77    | 84.98  | 79.08  | 89.46  | 77    |    |
|                                    |                 | 1998   | 3,177  | 3,127 | 3,226 | 79    | 82.77  | 81.46  | 84.03  | 76    |    |
|                                    |                 | 1999   | 3,141  | 2,905 | 3,458 | 82    | 80.68  | 74.60  | 88.81  | 79    |    |
|                                    |                 | 2000   | 3,143  | 2,699 | 3,517 | 79    | 79.50  | 68.28  | 88.97  | 74    |    |
|                                    |                 | 2001   | 3,109  | 2,510 | 3,579 | 83    | 77.52  | 62.58  | 89.23  | 79    |    |
|                                    |                 | 2002   | 3,158  | 2,333 | 3,486 | 78    | 77.77  | 57.44  | 85.83  | 75    |    |
|                                    |                 | 2003   | 3,164  | 2,166 | 3,733 | 77    | 77.15  | 52.82  | 91.02  | 75    |    |
|                                    |                 | 2004   | 3,165  | 2,015 | 3,999 | 79    | 76.46  | 48.67  | 96.63  | 75    |    |
|                                    |                 | 2005   | 3,177  | 1,878 | 4,280 | 79    | 75.94  | 44.88  | 102.30 | 77    |    |
|                                    | 2006            | 3,179  | 1,739  | 4,562 | 77    | 75.70 | 41.41  | 108.63 | 75     |       |    |
|                                    | 2007            | 3,199  | 1,608  | 4,873 | 77    | 75.48 | 37.94  | 114.98 | 76     |       |    |
|                                    |                 | Female | 1992   | 1,827 | 1,078 | 2,506 | 69     | 50.36  | 29.71  | 69.07 | 73 |
|                                    |                 |        | 1993   | 1,852 | 1,203 | 2,423 | 71     | 50.71  | 32.94  | 66.35 | 72 |
|                                    |                 |        | 1994   | 1,862 | 1,343 | 2,328 | 71     | 50.60  | 36.51  | 63.27 | 80 |
|                                    |                 |        | 1995   | 1,894 | 1,492 | 2,232 | 73     | 51.02  | 40.19  | 60.14 | 72 |
|                                    |                 |        | 1996   | 1,921 | 1,649 | 2,141 | 74     | 51.12  | 43.88  | 56.99 | 69 |
|                                    |                 |        | 1997   | 1,952 | 1,817 | 2,055 | 74     | 51.15  | 47.60  | 53.85 | 69 |
|                                    |                 |        | 1998   | 1,991 | 1,959 | 2,021 | 73     | 51.40  | 50.59  | 52.19 | 71 |
|                                    |                 |        | 1999   | 2,020 | 1,868 | 2,224 | 72     | 51.46  | 47.59  | 56.65 | 71 |
|                                    |                 |        | 2000   | 2,063 | 1,771 | 2,308 | 72     | 51.80  | 44.48  | 57.96 | 69 |
|                                    |                 |        | 2001   | 2,068 | 1,670 | 2,381 | 72     | 51.30  | 41.41  | 59.05 | 73 |
|                                    | 2002            |        | 2,116  | 1,563 | 2,335 | 69    | 51.94  | 38.36  | 57.32  | 69    |    |
|                                    | 2003            |        | 2,119  | 1,451 | 2,500 | 69    | 51.62  | 35.34  | 60.90  | 71    |    |
|                                    | 2004            | 2,103  | 1,338  | 2,657 | 69    | 50.80 | 32.34  | 64.20  | 72     |       |    |
|                                    | 2005            | 2,078  | 1,228  | 2,799 | 72    | 49.78 | 29.42  | 67.06  | 71     |       |    |
|                                    | 2006            | 2,029  | 1,110  | 2,912 | 77    | 48.48 | 26.52  | 69.57  | 74     |       |    |
|                                    | 2007            | 1,975  | 993    | 3,008 | 78    | 46.91 | 23.58  | 71.46  | 76     |       |    |

| Metropolitan Statistical Area      | PWID Population | Year  | Number      | Min   | Max   | Rank  | Rate   | Min   | Max    | Rank  |        |    |
|------------------------------------|-----------------|-------|-------------|-------|-------|-------|--------|-------|--------|-------|--------|----|
| Middlesex--Somerset--Hunterdon, NJ | Young (15-29)   | 1992  | 1,771       | 1,045 | 2,429 | 64    | 76.98  | 45.42 | 105.58 | 58    |        |    |
|                                    |                 | 1993  | 1,850       | 1,202 | 2,420 | 54    | 82.30  | 53.46 | 107.67 | 49    |        |    |
|                                    |                 | 1994  | 1,906       | 1,375 | 2,383 | 54    | 86.51  | 62.42 | 108.17 | 47    |        |    |
|                                    |                 | 1995  | 1,979       | 1,559 | 2,332 | 51    | 91.08  | 71.75 | 107.35 | 48    |        |    |
|                                    |                 | 1996  | 2,041       | 1,752 | 2,275 | 52    | 94.71  | 81.29 | 105.58 | 44    |        |    |
|                                    |                 | 1997  | 2,102       | 1,957 | 2,213 | 53    | 97.68  | 90.90 | 102.83 | 42    |        |    |
|                                    |                 | 1998  | 2,168       | 2,134 | 2,201 | 52    | 100.36 | 98.78 | 101.89 | 40    |        |    |
|                                    |                 | 1999  | 2,221       | 2,054 | 2,445 | 53    | 102.42 | 94.70 | 112.75 | 39    |        |    |
|                                    |                 | 2000  | 2,286       | 1,963 | 2,558 | 51    | 104.70 | 89.92 | 117.16 | 41    |        |    |
|                                    |                 | 2001  | 2,308       | 1,863 | 2,656 | 56    | 105.31 | 85.01 | 121.21 | 42    |        |    |
|                                    |                 | 2002  | 2,375       | 1,754 | 2,621 | 51    | 108.09 | 79.84 | 119.29 | 43    |        |    |
|                                    |                 | 2003  | 2,393       | 1,638 | 2,824 | 54    | 108.33 | 74.17 | 127.81 | 45    |        |    |
|                                    |                 | 2004  | 2,390       | 1,521 | 3,020 | 60    | 107.45 | 68.40 | 135.78 | 45    |        |    |
|                                    |                 | 2005  | 2,378       | 1,405 | 3,203 | 61    | 105.48 | 62.33 | 142.08 | 46    |        |    |
|                                    |                 | 2006  | 2,341       | 1,280 | 3,359 | 63    | 103.33 | 56.52 | 148.28 | 44    |        |    |
|                                    |                 | 2007  | 2,300       | 1,156 | 3,503 | 61    | 100.41 | 50.47 | 152.94 | 43    |        |    |
|                                    |                 |       | Old (30-64) | 1992  | 3,956 | 2,334 | 5,426  | 75    | 80.06  | 47.23 | 109.81 | 83 |
|                                    |                 |       |             | 1993  | 3,705 | 2,407 | 4,848  | 77    | 73.51  | 47.76 | 96.18  | 82 |
|                                    |                 |       |             | 1994  | 3,464 | 2,499 | 4,330  | 79    | 67.44  | 48.65 | 84.32  | 88 |
|                                    |                 |       |             | 1995  | 3,301 | 2,600 | 3,891  | 80    | 63.13  | 49.73 | 74.40  | 87 |
| 1996                               | 3,163           |       |             | 2,715 | 3,526 | 80    | 59.30  | 50.90 | 66.11  | 87    |        |    |
| 1997                               | 3,062           |       |             | 2,850 | 3,224 | 80    | 56.18  | 52.29 | 59.15  | 89    |        |    |
| 1998                               | 2,999           |       |             | 2,952 | 3,045 | 82    | 54.03  | 53.18 | 54.86  | 92    |        |    |
| 1999                               | 2,947           |       |             | 2,725 | 3,245 | 83    | 52.16  | 48.23 | 57.42  | 91    |        |    |
| 2000                               | 2,935           |       |             | 2,520 | 3,284 | 81    | 51.02  | 43.81 | 57.09  | 93    |        |    |
| 2001                               | 2,890           |       |             | 2,333 | 3,326 | 82    | 49.39  | 39.87 | 56.85  | 91    |        |    |
| 2002                               | 2,920           |       |             | 2,157 | 3,223 | 80    | 49.18  | 36.33 | 54.28  | 91    |        |    |
| 2003                               | 2,905           |       |             | 1,989 | 3,427 | 80    | 48.45  | 33.17 | 57.16  | 89    |        |    |
| 2004                               | 2,878           |       |             | 1,832 | 3,637 | 80    | 47.54  | 30.26 | 60.08  | 89    |        |    |
| 2005                               | 2,851           |       |             | 1,685 | 3,840 | 82    | 46.71  | 27.60 | 62.92  | 88    |        |    |
| 2006                               | 2,800           | 1,532 | 4,018       | 82    | 45.75 | 25.03 | 65.65  | 88    |        |       |        |    |
| 2007                               | 2,748           | 1,381 | 4,185       | 81    | 44.62 | 22.43 | 67.97  | 88    |        |       |        |    |



| Metropolitan Statistical Area | PWID Population | Year  | Number             | Min   | Max    | Rank  | Rate  | Min   | Max    | Rank  |       |    |
|-------------------------------|-----------------|-------|--------------------|-------|--------|-------|-------|-------|--------|-------|-------|----|
| Milwaukee--Waukesha, WI       | Total           | 1992  | 5,876              | 3,792 | 7,799  | 69    | 61.88 | 39.94 | 82.13  | 90    |       |    |
|                               |                 | 1993  | 4,940              | 2,235 | 7,660  | 76    | 51.72 | 23.40 | 80.20  | 93    |       |    |
|                               |                 | 1994  | 5,794              | 4,028 | 7,500  | 73    | 60.40 | 41.99 | 78.19  | 85    |       |    |
|                               |                 | 1995  | 4,995              | 2,714 | 7,348  | 77    | 51.75 | 28.12 | 76.14  | 90    |       |    |
|                               |                 | 1996  | 5,060              | 2,953 | 7,335  | 76    | 52.11 | 30.40 | 75.53  | 89    |       |    |
|                               |                 | 1997  | 5,127              | 3,165 | 7,398  | 74    | 52.71 | 32.54 | 76.06  | 88    |       |    |
|                               |                 | 1998  | 5,226              | 3,381 | 7,561  | 74    | 53.60 | 34.68 | 77.54  | 85    |       |    |
|                               |                 | 1999  | 5,925              | 4,613 | 7,776  | 69    | 60.52 | 47.11 | 79.43  | 80    |       |    |
|                               |                 | 2000  | 5,467              | 3,959 | 7,863  | 73    | 55.54 | 40.21 | 79.87  | 83    |       |    |
|                               |                 | 2001  | 6,045              | 4,892 | 8,002  | 68    | 60.86 | 49.25 | 80.56  | 81    |       |    |
|                               |                 | 2002  | 5,771              | 4,580 | 8,280  | 70    | 57.54 | 45.66 | 82.56  | 79    |       |    |
|                               |                 | 2003  | 5,980              | 4,893 | 8,721  | 70    | 59.14 | 48.39 | 86.24  | 77    |       |    |
|                               |                 | 2004  | 6,336              | 5,050 | 9,804  | 68    | 62.22 | 49.58 | 96.27  | 77    |       |    |
|                               |                 | 2005  | 6,710              | 4,975 | 10,969 | 58    | 65.51 | 48.57 | 107.09 | 72    |       |    |
|                               |                 | 2006  | 7,101              | 4,899 | 12,203 | 54    | 68.95 | 47.57 | 118.49 | 70    |       |    |
|                               |                 | 2007  | 7,504              | 4,817 | 13,492 | 53    | 72.54 | 46.57 | 130.43 | 67    |       |    |
|                               |                 |       | Non-Hispanic White | 1992  | 2,377  | 1,534 | 3,155 | 78    | 30.89  | 19.94 | 41.00 | 96 |
|                               |                 |       |                    | 1993  | 2,131  | 964   | 3,304 | 76    | 27.72  | 12.54 | 42.98 | 97 |
|                               |                 |       |                    | 1994  | 2,558  | 1,779 | 3,312 | 74    | 33.41  | 23.22 | 43.24 | 94 |
|                               |                 |       |                    | 1995  | 2,190  | 1,190 | 3,222 | 77    | 28.66  | 15.57 | 42.16 | 95 |
| 1996                          | 2,153           |       |                    | 1,256 | 3,121  | 79    | 28.22 | 16.47 | 40.91  | 94    |       |    |
| 1997                          | 2,080           |       |                    | 1,284 | 3,001  | 81    | 27.43 | 16.93 | 39.58  | 94    |       |    |
| 1998                          | 1,999           |       |                    | 1,293 | 2,892  | 82    | 26.49 | 17.14 | 38.32  | 96    |       |    |
| 1999                          | 2,128           |       |                    | 1,656 | 2,793  | 84    | 28.30 | 22.03 | 37.15  | 95    |       |    |
| 2000                          | 1,850           |       |                    | 1,340 | 2,661  | 86    | 24.66 | 17.85 | 35.46  | 98    |       |    |
| 2001                          | 1,953           |       |                    | 1,580 | 2,585  | 85    | 25.93 | 20.99 | 34.33  | 98    |       |    |
| 2002                          | 1,821           |       |                    | 1,445 | 2,612  | 88    | 24.10 | 19.12 | 34.57  | 100   |       |    |
| 2003                          | 1,901           |       |                    | 1,556 | 2,773  | 89    | 25.10 | 20.54 | 36.61  | 100   |       |    |
| 2004                          | 2,112           |       |                    | 1,683 | 3,267  | 84    | 27.84 | 22.18 | 43.07  | 99    |       |    |
| 2005                          | 2,445           |       |                    | 1,813 | 3,998  | 81    | 32.23 | 23.89 | 52.69  | 96    |       |    |
| 2006                          | 2,948           |       |                    | 2,033 | 5,065  | 78    | 38.88 | 26.82 | 66.81  | 91    |       |    |
| 2007                          | 3,660           | 2,349 | 6,581              | 67    | 48.33  | 31.02 | 86.89 | 81    |        |       |       |    |

| Metropolitan Statistical Area | PWID Population    | Year | Number   | Min   | Max    | Rank   | Rate   | Min    | Max    | Rank   |        |    |
|-------------------------------|--------------------|------|----------|-------|--------|--------|--------|--------|--------|--------|--------|----|
| Milwaukee--Waukesha, WI       | Non-Hispanic Black | 1992 | 2,683    | 1,731 | 3,560  | 42     | 212.89 | 137.40 | 282.55 | 72     |        |    |
|                               |                    | 1993 | 2,145    | 971   | 3,326  | 46     | 166.54 | 75.36  | 258.23 | 81     |        |    |
|                               |                    | 1994 | 2,448    | 1,702 | 3,168  | 43     | 185.60 | 129.03 | 240.26 | 74     |        |    |
|                               |                    | 1995 | 2,092    | 1,137 | 3,078  | 44     | 154.87 | 84.15  | 227.83 | 77     |        |    |
|                               |                    | 1996 | 2,132    | 1,244 | 3,091  | 41     | 154.03 | 89.88  | 223.28 | 76     |        |    |
|                               |                    | 1997 | 2,195    | 1,355 | 3,167  | 40     | 156.64 | 96.69  | 226.02 | 72     |        |    |
|                               |                    | 1998 | 2,283    | 1,477 | 3,303  | 35     | 161.25 | 104.32 | 233.28 | 66     |        |    |
|                               |                    | 1999 | 2,641    | 2,056 | 3,467  | 32     | 183.74 | 143.04 | 241.16 | 55     |        |    |
|                               |                    | 2000 | 2,475    | 1,792 | 3,560  | 28     | 170.10 | 123.17 | 244.64 | 53     |        |    |
|                               |                    | 2001 | 2,754    | 2,228 | 3,645  | 27     | 186.37 | 150.81 | 246.70 | 47     |        |    |
|                               |                    | 2002 | 2,610    | 2,071 | 3,745  | 26     | 173.30 | 137.51 | 248.63 | 44     |        |    |
|                               |                    | 2003 | 2,636    | 2,157 | 3,844  | 27     | 172.07 | 140.79 | 250.94 | 41     |        |    |
|                               |                    | 2004 | 2,659    | 2,119 | 4,114  | 26     | 170.95 | 136.24 | 264.50 | 42     |        |    |
|                               |                    | 2005 | 2,600    | 1,928 | 4,250  | 26     | 164.78 | 122.17 | 269.38 | 43     |        |    |
|                               |                    | 2006 | 2,445    | 1,687 | 4,202  | 29     | 152.58 | 105.25 | 262.20 | 49     |        |    |
|                               |                    | 2007 | 2,190    | 1,406 | 3,937  | 32     | 135.08 | 86.71  | 242.87 | 56     |        |    |
|                               |                    |      | Hispanic | 1992  | 563    | 363    | 747    | 49     | 158.89 | 102.54 | 210.88 | 42 |
|                               |                    |      |          | 1993  | 438    | 198    | 679    | 54     | 115.85 | 52.42  | 179.63 | 49 |
|                               |                    |      |          | 1994  | 499    | 347    | 645    | 52     | 122.38 | 85.08  | 158.42 | 45 |
|                               |                    |      |          | 1995  | 434    | 236    | 638    | 55     | 98.70  | 53.63  | 145.20 | 51 |
| 1996                          | 458                |      |          | 267   | 664    | 55     | 97.40  | 56.83  | 141.18 | 48     |        |    |
| 1997                          | 496                |      |          | 306   | 715    | 53     | 98.87  | 61.03  | 142.66 | 47     |        |    |
| 1998                          | 549                |      |          | 355   | 795    | 53     | 102.47 | 66.29  | 148.24 | 41     |        |    |
| 1999                          | 684                |      |          | 533   | 898    | 51     | 120.27 | 93.63  | 157.85 | 35     |        |    |
| 2000                          | 695                |      |          | 504   | 1,000  | 52     | 115.03 | 83.29  | 165.44 | 38     |        |    |
| 2001                          | 845                |      |          | 684   | 1,118  | 47     | 133.07 | 107.68 | 176.15 | 29     |        |    |
| 2002                          | 878                |      |          | 697   | 1,259  | 49     | 131.97 | 104.72 | 189.34 | 27     |        |    |
| 2003                          | 976                |      |          | 798   | 1,423  | 49     | 140.86 | 115.26 | 205.43 | 23     |        |    |
| 2004                          | 1,087              |      |          | 866   | 1,682  | 48     | 151.31 | 120.58 | 234.10 | 23     |        |    |
| 2005                          | 1,180              |      |          | 875   | 1,929  | 47     | 158.48 | 117.50 | 259.08 | 20     |        |    |
| 2006                          | 1,243              | 857  | 2,136    | 44    | 160.89 | 110.98 | 276.47 | 21     |        |        |        |    |
| 2007                          | 1,261              | 810  | 2,267    | 45    | 157.45 | 101.07 | 283.09 | 22     |        |        |        |    |

| Metropolitan Statistical Area | PWID Population | Year   | Number | Min   | Max   | Rank  | Rate  | Min    | Max    | Rank  |    |
|-------------------------------|-----------------|--------|--------|-------|-------|-------|-------|--------|--------|-------|----|
| Milwaukee--Waukesha, WI       | Male            | 1992   | 4,243  | 2,738 | 5,631 | 65    | 91.26 | 58.90  | 121.12 | 84    |    |
|                               |                 | 1993   | 3,526  | 1,595 | 5,467 | 74    | 75.31 | 34.08  | 116.78 | 87    |    |
|                               |                 | 1994   | 4,103  | 2,853 | 5,311 | 67    | 87.20 | 60.62  | 112.88 | 85    |    |
|                               |                 | 1995   | 3,522  | 1,914 | 5,181 | 72    | 74.30 | 40.38  | 109.31 | 86    |    |
|                               |                 | 1996   | 3,563  | 2,079 | 5,165 | 73    | 74.66 | 43.56  | 108.22 | 85    |    |
|                               |                 | 1997   | 3,613  | 2,231 | 5,214 | 71    | 75.57 | 46.65  | 109.04 | 82    |    |
|                               |                 | 1998   | 3,692  | 2,389 | 5,341 | 68    | 76.97 | 49.80  | 111.35 | 80    |    |
|                               |                 | 1999   | 4,198  | 3,268 | 5,510 | 64    | 87.11 | 67.82  | 114.33 | 76    |    |
|                               |                 | 2000   | 3,885  | 2,813 | 5,588 | 66    | 80.11 | 58.01  | 115.21 | 73    |    |
|                               |                 | 2001   | 4,306  | 3,484 | 5,699 | 63    | 87.90 | 71.13  | 116.35 | 73    |    |
|                               |                 | 2002   | 4,114  | 3,265 | 5,903 | 61    | 83.08 | 65.92  | 119.19 | 69    |    |
|                               |                 | 2003   | 4,257  | 3,483 | 6,208 | 57    | 85.14 | 69.67  | 124.17 | 68    |    |
|                               |                 | 2004   | 4,492  | 3,580 | 6,950 | 56    | 89.09 | 71.00  | 137.85 | 67    |    |
|                               |                 | 2005   | 4,720  | 3,499 | 7,715 | 53    | 92.95 | 68.91  | 151.95 | 63    |    |
|                               | 2006            | 4,933  | 3,403  | 8,476 | 51    | 96.59 | 66.63 | 165.98 | 62     |       |    |
|                               | 2007            | 5,117  | 3,285  | 9,200 | 52    | 99.68 | 63.99 | 179.23 | 60     |       |    |
|                               |                 | Female | 1992   | 1,766 | 1,140 | 2,344 | 72    | 36.45  | 23.52  | 48.37 | 89 |
|                               |                 |        | 1993   | 1,516 | 686   | 2,350 | 79    | 31.12  | 14.08  | 48.26 | 92 |
|                               |                 |        | 1994   | 1,798 | 1,250 | 2,327 | 73    | 36.78  | 25.57  | 47.62 | 88 |
|                               |                 |        | 1995   | 1,555 | 845   | 2,288 | 79    | 31.67  | 17.21  | 46.59 | 92 |
|                               |                 |        | 1996   | 1,572 | 917   | 2,279 | 81    | 31.84  | 18.58  | 46.15 | 92 |
|                               |                 |        | 1997   | 1,583 | 977   | 2,284 | 82    | 32.01  | 19.76  | 46.19 | 93 |
|                               |                 |        | 1998   | 1,599 | 1,035 | 2,313 | 81    | 32.27  | 20.88  | 46.69 | 94 |
|                               |                 |        | 1999   | 1,795 | 1,397 | 2,356 | 81    | 36.11  | 28.11  | 47.39 | 91 |
|                               |                 |        | 2000   | 1,641 | 1,188 | 2,361 | 81    | 32.86  | 23.80  | 47.27 | 94 |
|                               |                 |        | 2001   | 1,803 | 1,459 | 2,387 | 81    | 35.81  | 28.98  | 47.40 | 91 |
|                               | 2002            |        | 1,717  | 1,363 | 2,464 | 80    | 33.82 | 26.84  | 48.53  | 94    |    |
|                               | 2003            |        | 1,786  | 1,461 | 2,604 | 79    | 34.93 | 28.58  | 50.94  | 93    |    |
|                               | 2004            | 1,913  | 1,525  | 2,960 | 78    | 37.21 | 29.66 | 57.58  | 91     |       |    |
|                               | 2005            | 2,068  | 1,533  | 3,381 | 73    | 40.04 | 29.68 | 65.45  | 86     |       |    |
|                               | 2006            | 2,258  | 1,558  | 3,880 | 67    | 43.49 | 30.00 | 74.74  | 82     |       |    |
|                               | 2007            | 2,492  | 1,599  | 4,480 | 61    | 47.82 | 30.69 | 85.97  | 74     |       |    |

| Metropolitan Statistical Area | PWID Population | Year        | Number | Min   | Max   | Rank  | Rate  | Min    | Max    | Rank  |    |
|-------------------------------|-----------------|-------------|--------|-------|-------|-------|-------|--------|--------|-------|----|
| Milwaukee--Waukesha, WI       | Young (15-29)   | 1992        | 1,425  | 920   | 1,892 | 74    | 45.25 | 29.20  | 60.05  | 82    |    |
|                               |                 | 1993        | 1,046  | 473   | 1,622 | 79    | 33.61 | 15.21  | 52.12  | 93    |    |
|                               |                 | 1994        | 1,112  | 773   | 1,440 | 80    | 36.05 | 25.07  | 46.67  | 93    |    |
|                               |                 | 1995        | 902    | 490   | 1,327 | 82    | 29.35 | 15.95  | 43.18  | 96    |    |
|                               |                 | 1996        | 891    | 520   | 1,292 | 83    | 29.01 | 16.93  | 42.05  | 96    |    |
|                               |                 | 1997        | 909    | 561   | 1,311 | 85    | 29.71 | 18.34  | 42.87  | 95    |    |
|                               |                 | 1998        | 958    | 620   | 1,386 | 86    | 31.40 | 20.31  | 45.42  | 94    |    |
|                               |                 | 1999        | 1,150  | 895   | 1,510 | 85    | 37.83 | 29.45  | 49.66  | 94    |    |
|                               |                 | 2000        | 1,145  | 829   | 1,647 | 85    | 37.79 | 27.36  | 54.34  | 95    |    |
|                               |                 | 2001        | 1,384  | 1,120 | 1,832 | 84    | 46.01 | 37.23  | 60.90  | 91    |    |
|                               |                 | 2002        | 1,457  | 1,156 | 2,090 | 79    | 48.34 | 38.36  | 69.36  | 86    |    |
|                               |                 | 2003        | 1,671  | 1,367 | 2,437 | 76    | 55.17 | 45.15  | 80.47  | 84    |    |
|                               |                 | 2004        | 1,958  | 1,561 | 3,030 | 71    | 64.52 | 51.42  | 99.82  | 79    |    |
|                               |                 | 2005        | 2,283  | 1,692 | 3,732 | 63    | 75.42 | 55.91  | 123.29 | 73    |    |
|                               |                 | 2006        | 2,638  | 1,819 | 4,532 | 56    | 87.12 | 60.10  | 149.71 | 57    |    |
|                               | 2007            | 3,009       | 1,932  | 5,411 | 47    | 99.38 | 63.80 | 178.69 | 44     |       |    |
|                               |                 | Old (30-64) | 1992   | 4,530 | 2,924 | 6,013 | 67    | 71.40  | 46.08  | 94.76 | 89 |
|                               |                 |             | 1993   | 3,964 | 1,794 | 6,146 | 74    | 61.55  | 27.85  | 95.43 | 91 |
|                               |                 |             | 1994   | 4,761 | 3,310 | 6,164 | 65    | 73.16  | 50.86  | 94.70 | 86 |
|                               |                 |             | 1995   | 4,159 | 2,260 | 6,118 | 71    | 63.23  | 34.36  | 93.02 | 86 |
|                               |                 |             | 1996   | 4,234 | 2,470 | 6,137 | 69    | 63.76  | 37.21  | 92.43 | 84 |
|                               | 1997            |             | 4,282  | 2,643 | 6,179 | 68    | 64.21 | 39.64  | 92.65  | 82    |    |
|                               | 1998            |             | 4,331  | 2,802 | 6,265 | 67    | 64.64 | 41.82  | 93.52  | 79    |    |
|                               | 1999            |             | 4,844  | 3,771 | 6,358 | 65    | 71.76 | 55.87  | 94.18  | 77    |    |
|                               | 2000            |             | 4,386  | 3,176 | 6,308 | 63    | 64.37 | 46.61  | 92.58  | 74    |    |
|                               | 2001            |             | 4,736  | 3,832 | 6,268 | 63    | 68.38 | 55.34  | 90.52  | 76    |    |
|                               | 2002            | 4,394       | 3,487  | 6,305 | 64    | 62.64 | 49.71 | 89.87  | 72     |       |    |
|                               | 2003            | 4,410       | 3,609  | 6,432 | 62    | 62.27 | 50.95 | 90.81  | 72     |       |    |
|                               | 2004            | 4,518       | 3,601  | 6,990 | 59    | 63.20 | 50.37 | 97.79  | 69     |       |    |
|                               | 2005            | 4,626       | 3,430  | 7,562 | 55    | 64.10 | 47.53 | 104.80 | 67     |       |    |
|                               | 2006            | 4,746       | 3,274  | 8,155 | 54    | 65.27 | 45.02 | 112.16 | 62     |       |    |
|                               | 2007            | 4,887       | 3,137  | 8,787 | 52    | 66.80 | 42.88 | 120.11 | 61     |       |    |

| Metropolitan Statistical Area | PWID Population | Year  | Number             | Min   | Max    | Rank  | Rate   | Min   | Max   | Rank  |       |    |
|-------------------------------|-----------------|-------|--------------------|-------|--------|-------|--------|-------|-------|-------|-------|----|
| Minneapolis--St. Paul, MN--WI | Total           | 1992  | 10,023             | 5,804 | 17,642 | 45    | 56.79  | 32.89 | 99.95 | 92    |       |    |
|                               |                 | 1993  | 8,173              | 3,644 | 16,616 | 48    | 45.49  | 20.28 | 92.48 | 95    |       |    |
|                               |                 | 1994  | 9,302              | 5,280 | 15,461 | 48    | 50.90  | 28.89 | 84.59 | 95    |       |    |
|                               |                 | 1995  | 7,695              | 4,020 | 14,283 | 51    | 41.33  | 21.59 | 76.71 | 96    |       |    |
|                               |                 | 1996  | 7,464              | 4,221 | 13,127 | 52    | 39.37  | 22.26 | 69.24 | 98    |       |    |
|                               |                 | 1997  | 7,208              | 4,427 | 11,897 | 57    | 37.42  | 22.98 | 61.76 | 99    |       |    |
|                               |                 | 1998  | 6,886              | 4,192 | 10,364 | 59    | 35.22  | 21.44 | 53.01 | 99    |       |    |
|                               |                 | 1999  | 7,148              | 3,937 | 8,811  | 61    | 35.90  | 19.77 | 44.25 | 99    |       |    |
|                               |                 | 2000  | 6,683              | 3,932 | 9,058  | 60    | 32.92  | 19.37 | 44.63 | 100   |       |    |
|                               |                 | 2001  | 7,203              | 3,917 | 9,415  | 60    | 34.89  | 18.97 | 45.60 | 99    |       |    |
|                               |                 | 2002  | 7,120              | 3,882 | 9,740  | 53    | 34.06  | 18.57 | 46.59 | 100   |       |    |
|                               |                 | 2003  | 7,505              | 3,837 | 10,636 | 51    | 35.54  | 18.17 | 50.36 | 100   |       |    |
|                               |                 | 2004  | 8,068              | 3,785 | 12,496 | 50    | 37.79  | 17.73 | 58.53 | 99    |       |    |
|                               |                 | 2005  | 8,641              | 3,731 | 14,395 | 49    | 40.03  | 17.28 | 66.69 | 98    |       |    |
|                               |                 | 2006  | 9,266              | 3,681 | 16,471 | 45    | 42.42  | 16.85 | 75.41 | 98    |       |    |
|                               |                 | 2007  | 9,892              | 3,627 | 18,582 | 43    | 44.78  | 16.42 | 84.12 | 98    |       |    |
|                               |                 |       | Non-Hispanic White | 1992  | 5,884  | 3,407 | 10,357 | 40    | 36.45 | 21.11 | 64.16 | 91 |
|                               |                 |       |                    | 1993  | 4,925  | 2,196 | 10,011 | 45    | 30.14 | 13.44 | 61.28 | 94 |
|                               |                 |       |                    | 1994  | 5,706  | 3,239 | 9,484  | 41    | 34.54 | 19.61 | 57.41 | 92 |
|                               |                 |       |                    | 1995  | 4,775  | 2,495 | 8,863  | 45    | 28.56 | 14.92 | 53.02 | 96 |
| 1996                          | 4,664           |       |                    | 2,638 | 8,202  | 46    | 27.57  | 15.59 | 48.50 | 96    |       |    |
| 1997                          | 4,519           |       |                    | 2,775 | 7,459  | 46    | 26.50  | 16.28 | 43.75 | 97    |       |    |
| 1998                          | 4,321           |       |                    | 2,631 | 6,504  | 46    | 25.18  | 15.33 | 37.89 | 98    |       |    |
| 1999                          | 4,484           |       |                    | 2,470 | 5,527  | 45    | 25.87  | 14.25 | 31.89 | 98    |       |    |
| 2000                          | 4,189           |       |                    | 2,465 | 5,678  | 48    | 23.88  | 14.05 | 32.37 | 100   |       |    |
| 2001                          | 4,514           |       |                    | 2,454 | 5,899  | 46    | 25.43  | 13.83 | 33.24 | 99    |       |    |
| 2002                          | 4,467           |       |                    | 2,435 | 6,111  | 43    | 24.99  | 13.62 | 34.18 | 99    |       |    |
| 2003                          | 4,725           |       |                    | 2,416 | 6,697  | 43    | 26.30  | 13.45 | 37.27 | 98    |       |    |
| 2004                          | 5,115           |       |                    | 2,399 | 7,922  | 41    | 28.28  | 13.27 | 43.80 | 97    |       |    |
| 2005                          | 5,537           |       |                    | 2,390 | 9,224  | 40    | 30.42  | 13.13 | 50.68 | 97    |       |    |
| 2006                          | 6,027           |       |                    | 2,394 | 10,714 | 35    | 32.88  | 13.06 | 58.46 | 97    |       |    |
| 2007                          | 6,562           | 2,406 | 12,327             | 34    | 35.56  | 13.04 | 66.80  | 93    |       |       |       |    |

| Metropolitan Statistical Area | PWID Population    | Year | Number   | Min   | Max   | Rank  | Rate   | Min    | Max    | Rank  |        |    |
|-------------------------------|--------------------|------|----------|-------|-------|-------|--------|--------|--------|-------|--------|----|
| Minneapolis--St. Paul, MN--WI | Non-Hispanic Black | 1992 | 2,866    | 1,660 | 5,044 | 40    | 458.85 | 265.72 | 807.63 | 22    |        |    |
|                               |                    | 1993 | 2,118    | 944   | 4,305 | 49    | 314.32 | 140.15 | 638.99 | 42    |        |    |
|                               |                    | 1994 | 2,218    | 1,259 | 3,686 | 47    | 304.61 | 172.91 | 506.29 | 41    |        |    |
|                               |                    | 1995 | 1,713    | 895   | 3,180 | 54    | 219.02 | 114.42 | 406.54 | 52    |        |    |
|                               |                    | 1996 | 1,572    | 889   | 2,765 | 57    | 188.33 | 106.52 | 331.24 | 62    |        |    |
|                               |                    | 1997 | 1,453    | 893   | 2,399 | 58    | 163.22 | 100.24 | 269.41 | 67    |        |    |
|                               |                    | 1998 | 1,342    | 817   | 2,020 | 59    | 140.94 | 85.80  | 212.12 | 75    |        |    |
|                               |                    | 1999 | 1,358    | 748   | 1,673 | 60    | 132.55 | 73.00  | 163.39 | 76    |        |    |
|                               |                    | 2000 | 1,244    | 732   | 1,686 | 61    | 114.57 | 67.40  | 155.28 | 78    |        |    |
|                               |                    | 2001 | 1,318    | 717   | 1,723 | 61    | 115.74 | 62.93  | 151.27 | 77    |        |    |
|                               |                    | 2002 | 1,283    | 699   | 1,755 | 61    | 108.48 | 59.15  | 148.41 | 74    |        |    |
|                               |                    | 2003 | 1,330    | 680   | 1,885 | 57    | 108.18 | 55.31  | 153.31 | 71    |        |    |
|                               |                    | 2004 | 1,402    | 658   | 2,172 | 57    | 110.02 | 51.61  | 170.41 | 68    |        |    |
|                               |                    | 2005 | 1,466    | 633   | 2,442 | 53    | 111.11 | 47.97  | 185.11 | 67    |        |    |
|                               |                    | 2006 | 1,525    | 606   | 2,711 | 53    | 111.20 | 44.18  | 197.68 | 66    |        |    |
|                               |                    | 2007 | 1,570    | 576   | 2,949 | 52    | 110.58 | 40.55  | 207.74 | 68    |        |    |
|                               |                    |      | Hispanic | 1992  | 303   | 176   | 534    | 59     | 106.74 | 61.82 | 187.88 | 60 |
|                               |                    |      |          | 1993  | 242   | 108   | 492    | 62     | 76.84  | 34.26 | 156.22 | 63 |
|                               |                    |      |          | 1994  | 270   | 153   | 448    | 62     | 78.34  | 44.47 | 130.21 | 64 |
|                               |                    |      |          | 1995  | 219   | 114   | 406    | 63     | 57.21  | 29.89 | 106.18 | 73 |
| 1996                          | 209                |      |          | 118   | 367   | 65    | 48.69  | 27.54  | 85.63  | 76    |        |    |
| 1997                          | 198                |      |          | 122   | 328   | 66    | 41.08  | 25.23  | 67.80  | 79    |        |    |
| 1998                          | 187                |      |          | 114   | 282   | 66    | 34.54  | 21.02  | 51.98  | 83    |        |    |
| 1999                          | 192                |      |          | 106   | 237   | 69    | 31.95  | 17.59  | 39.38  | 84    |        |    |
| 2000                          | 179                |      |          | 105   | 242   | 68    | 27.04  | 15.91  | 36.64  | 85    |        |    |
| 2001                          | 192                |      |          | 104   | 251   | 71    | 27.25  | 14.81  | 35.61  | 86    |        |    |
| 2002                          | 190                |      |          | 103   | 260   | 68    | 25.43  | 13.86  | 34.78  | 86    |        |    |
| 2003                          | 201                |      |          | 103   | 285   | 68    | 25.69  | 13.13  | 36.41  | 86    |        |    |
| 2004                          | 219                |      |          | 103   | 339   | 68    | 26.77  | 12.56  | 41.46  | 85    |        |    |
| 2005                          | 239                |      |          | 103   | 399   | 69    | 27.94  | 12.06  | 46.55  | 81    |        |    |
| 2006                          | 264                |      |          | 105   | 470   | 68    | 29.50  | 11.72  | 52.44  | 81    |        |    |
| 2007                          | 293                | 108  | 551      | 68    | 31.50 | 11.55 | 59.18  | 78     |        |       |        |    |

| Metropolitan Statistical Area | PWID Population | Year   | Number | Min    | Max    | Rank  | Rate  | Min    | Max    | Rank  |     |
|-------------------------------|-----------------|--------|--------|--------|--------|-------|-------|--------|--------|-------|-----|
| Minneapolis--St. Paul, MN--WI | Male            | 1992   | 6,682  | 3,869  | 11,761 | 43    | 75.99 | 44.00  | 133.74 | 93    |     |
|                               |                 | 1993   | 5,492  | 2,449  | 11,165 | 46    | 61.29 | 27.33  | 124.60 | 96    |     |
|                               |                 | 1994   | 6,275  | 3,562  | 10,430 | 44    | 68.81 | 39.06  | 114.37 | 94    |     |
|                               |                 | 1995   | 5,195  | 2,714  | 9,642  | 46    | 55.87 | 29.19  | 103.70 | 96    |     |
|                               |                 | 1996   | 5,029  | 2,844  | 8,845  | 49    | 53.09 | 30.02  | 93.37  | 98    |     |
|                               |                 | 1997   | 4,837  | 2,971  | 7,984  | 54    | 50.25 | 30.86  | 82.93  | 99    |     |
|                               |                 | 1998   | 4,596  | 2,798  | 6,917  | 56    | 47.03 | 28.63  | 70.79  | 99    |     |
|                               |                 | 1999   | 4,741  | 2,611  | 5,844  | 57    | 47.60 | 26.22  | 58.67  | 99    |     |
|                               |                 | 2000   | 4,403  | 2,591  | 5,968  | 57    | 43.34 | 25.50  | 58.74  | 99    |     |
|                               |                 | 2001   | 4,716  | 2,564  | 6,163  | 55    | 45.59 | 24.79  | 59.58  | 99    |     |
|                               |                 | 2002   | 4,636  | 2,528  | 6,342  | 49    | 44.22 | 24.11  | 60.50  | 99    |     |
|                               |                 | 2003   | 4,869  | 2,489  | 6,900  | 49    | 45.90 | 23.47  | 65.05  | 98    |     |
|                               |                 | 2004   | 5,228  | 2,452  | 8,097  | 47    | 48.72 | 22.85  | 75.46  | 98    |     |
|                               |                 | 2005   | 5,609  | 2,422  | 9,344  | 47    | 51.66 | 22.30  | 86.06  | 98    |     |
|                               | 2006            | 6,047  | 2,402  | 10,750 | 43     | 55.02 | 21.86 | 97.80  | 98     |       |     |
|                               | 2007            | 6,518  | 2,390  | 12,244 | 40     | 58.61 | 21.49 | 110.10 | 98     |       |     |
|                               |                 | Female | 1992   | 3,312  | 1,918  | 5,829 | 44    | 37.39  | 21.65  | 65.82 | 87  |
|                               |                 |        | 1993   | 2,696  | 1,202  | 5,481 | 51    | 29.93  | 13.35  | 60.85 | 95  |
|                               |                 |        | 1994   | 3,079  | 1,748  | 5,117 | 47    | 33.62  | 19.08  | 55.88 | 93  |
|                               |                 |        | 1995   | 2,565  | 1,340  | 4,762 | 54    | 27.52  | 14.38  | 51.09 | 98  |
|                               |                 |        | 1996   | 2,514  | 1,422  | 4,421 | 57    | 26.50  | 14.99  | 46.60 | 99  |
|                               |                 |        | 1997   | 2,457  | 1,509  | 4,055 | 60    | 25.50  | 15.66  | 42.09 | 100 |
|                               |                 |        | 1998   | 2,376  | 1,447  | 3,576 | 60    | 24.30  | 14.79  | 36.57 | 100 |
|                               |                 |        | 1999   | 2,496  | 1,375  | 3,077 | 62    | 25.09  | 13.82  | 30.92 | 100 |
|                               |                 |        | 2000   | 2,359  | 1,388  | 3,197 | 63    | 23.26  | 13.69  | 31.53 | 100 |
|                               |                 |        | 2001   | 2,562  | 1,393  | 3,349 | 61    | 24.87  | 13.52  | 32.51 | 100 |
|                               | 2002            |        | 2,544  | 1,387  | 3,480  | 59    | 24.41 | 13.31  | 33.40  | 100   |     |
|                               | 2003            |        | 2,681  | 1,370  | 3,799  | 56    | 25.50 | 13.04  | 36.14  | 100   |     |
|                               | 2004            | 2,865  | 1,344  | 4,437  | 52     | 26.97 | 12.65 | 41.78  | 100    |       |     |
|                               | 2005            | 3,030  | 1,308  | 5,048  | 49     | 28.24 | 12.19 | 47.05  | 98     |       |     |
|                               | 2006            | 3,183  | 1,265  | 5,659  | 46     | 29.33 | 11.65 | 52.14  | 98     |       |     |
|                               | 2007            | 3,299  | 1,210  | 6,197  | 45     | 30.08 | 11.03 | 56.51  | 97     |       |     |

| Metropolitan Statistical Area | PWID Population | Year        | Number | Min   | Max   | Rank   | Rate  | Min    | Max    | Rank  |     |
|-------------------------------|-----------------|-------------|--------|-------|-------|--------|-------|--------|--------|-------|-----|
| Minneapolis--St. Paul, MN--WI | Young (15-29)   | 1992        | 3,824  | 2,214 | 6,731 | 34     | 65.30 | 37.82  | 114.94 | 67    |     |
|                               |                 | 1993        | 3,047  | 1,358 | 6,194 | 35     | 52.44 | 23.38  | 106.62 | 72    |     |
|                               |                 | 1994        | 3,417  | 1,940 | 5,679 | 33     | 59.08 | 33.53  | 98.19  | 71    |     |
|                               |                 | 1995        | 2,807  | 1,466 | 5,210 | 37     | 48.23 | 25.19  | 89.52  | 76    |     |
|                               |                 | 1996        | 2,721  | 1,539 | 4,786 | 37     | 46.24 | 26.15  | 81.33  | 79    |     |
|                               |                 | 1997        | 2,642  | 1,622 | 4,360 | 37     | 44.31 | 27.21  | 73.13  | 80    |     |
|                               |                 | 1998        | 2,549  | 1,551 | 3,836 | 39     | 42.12 | 25.64  | 63.40  | 83    |     |
|                               |                 | 1999        | 2,681  | 1,477 | 3,305 | 44     | 43.65 | 24.04  | 53.81  | 88    |     |
|                               |                 | 2000        | 2,546  | 1,498 | 3,451 | 46     | 40.90 | 24.07  | 55.44  | 87    |     |
|                               |                 | 2001        | 2,792  | 1,518 | 3,649 | 46     | 44.84 | 24.38  | 58.60  | 93    |     |
|                               |                 | 2002        | 2,807  | 1,531 | 3,841 | 45     | 44.92 | 24.49  | 61.45  | 93    |     |
|                               |                 | 2003        | 3,009  | 1,538 | 4,264 | 44     | 47.82 | 24.45  | 67.78  | 93    |     |
|                               |                 | 2004        | 3,283  | 1,540 | 5,084 | 39     | 51.81 | 24.30  | 80.24  | 91    |     |
|                               |                 | 2005        | 3,559  | 1,536 | 5,929 | 37     | 55.81 | 24.10  | 92.98  | 93    |     |
|                               |                 | 2006        | 3,849  | 1,529 | 6,842 | 37     | 59.84 | 23.77  | 106.37 | 88    |     |
|                               | 2007            | 4,126       | 1,513  | 7,750 | 33    | 63.71  | 23.36 | 119.68 | 84     |       |     |
|                               |                 | Old (30-64) | 1992   | 6,431 | 3,724 | 11,319 | 52    | 54.53  | 31.58  | 95.97 | 95  |
|                               |                 |             | 1993   | 5,233 | 2,333 | 10,638 | 59    | 43.04  | 19.19  | 87.50 | 98  |
|                               |                 |             | 1994   | 5,956 | 3,381 | 9,900  | 55    | 47.68  | 27.06  | 79.24 | 97  |
|                               |                 |             | 1995   | 4,935 | 2,578 | 9,160  | 62    | 38.55  | 20.14  | 71.56 | 100 |
|                               |                 |             | 1996   | 4,796 | 2,712 | 8,435  | 63    | 36.68  | 20.74  | 64.51 | 100 |
|                               |                 |             | 1997   | 4,638 | 2,848 | 7,655  | 64    | 34.87  | 21.42  | 57.56 | 100 |
|                               |                 |             | 1998   | 4,430 | 2,697 | 6,667  | 64    | 32.82  | 19.98  | 49.39 | 100 |
|                               |                 |             | 1999   | 4,586 | 2,526 | 5,653  | 68    | 33.31  | 18.34  | 41.06 | 98  |
|                               |                 |             | 2000   | 4,261 | 2,507 | 5,776  | 65    | 30.28  | 17.82  | 41.04 | 100 |
|                               | 2001            |             | 4,544  | 2,471 | 5,939 | 65     | 31.51 | 17.13  | 41.19  | 98    |     |
|                               | 2002            | 4,419       | 2,409  | 6,045 | 63    | 30.16  | 16.44 | 41.25  | 99     |       |     |
|                               | 2003            | 4,551       | 2,327  | 6,450 | 58    | 30.70  | 15.69 | 43.50  | 98     |       |     |
|                               | 2004            | 4,740       | 2,224  | 7,342 | 55    | 31.57  | 14.81 | 48.90  | 98     |       |     |
|                               | 2005            | 4,865       | 2,101  | 8,106 | 53    | 31.99  | 13.81 | 53.29  | 98     |       |     |
|                               | 2006            | 4,932       | 1,959  | 8,768 | 52    | 32.00  | 12.71 | 56.89  | 98     |       |     |
|                               | 2007            | 4,893       | 1,794  | 9,192 | 51    | 31.34  | 11.49 | 58.88  | 97     |       |     |



| Metropolitan Statistical Area | PWID Population | Year  | Number             | Min   | Max    | Rank  | Rate   | Min   | Max    | Rank  |       |    |
|-------------------------------|-----------------|-------|--------------------|-------|--------|-------|--------|-------|--------|-------|-------|----|
| Monmouth--Ocean, NJ           | Total           | 1992  | 6,684              | 5,565 | 8,478  | 63    | 106.59 | 88.75 | 135.20 | 49    |       |    |
|                               |                 | 1993  | 5,683              | 3,522 | 7,875  | 69    | 89.76  | 55.62 | 124.37 | 55    |       |    |
|                               |                 | 1994  | 6,132              | 5,378 | 7,267  | 68    | 95.89  | 84.11 | 113.64 | 53    |       |    |
|                               |                 | 1995  | 5,554              | 4,522 | 6,730  | 70    | 85.57  | 69.66 | 103.68 | 58    |       |    |
|                               |                 | 1996  | 5,502              | 4,702 | 6,227  | 72    | 83.58  | 71.42 | 94.59  | 61    |       |    |
|                               |                 | 1997  | 5,489              | 4,377 | 6,170  | 71    | 81.96  | 65.35 | 92.12  | 63    |       |    |
|                               |                 | 1998  | 5,524              | 4,114 | 6,355  | 70    | 81.15  | 60.45 | 93.36  | 61    |       |    |
|                               |                 | 1999  | 5,124              | 3,858 | 6,544  | 80    | 74.07  | 55.77 | 94.60  | 67    |       |    |
|                               |                 | 2000  | 5,638              | 3,631 | 7,594  | 68    | 80.12  | 51.60 | 107.91 | 63    |       |    |
|                               |                 | 2001  | 4,913              | 3,553 | 6,899  | 82    | 68.52  | 49.56 | 96.22  | 74    |       |    |
|                               |                 | 2002  | 5,708              | 3,752 | 8,139  | 73    | 77.94  | 51.23 | 111.12 | 65    |       |    |
|                               |                 | 2003  | 5,709              | 3,704 | 7,894  | 73    | 76.71  | 49.77 | 106.07 | 64    |       |    |
|                               |                 | 2004  | 5,806              | 3,423 | 7,549  | 72    | 77.01  | 45.41 | 100.14 | 63    |       |    |
|                               |                 | 2005  | 6,048              | 3,157 | 7,145  | 71    | 79.38  | 41.43 | 93.78  | 59    |       |    |
|                               |                 | 2006  | 6,282              | 2,897 | 8,756  | 69    | 81.85  | 37.75 | 114.09 | 59    |       |    |
|                               |                 | 2007  | 6,528              | 2,633 | 10,595 | 65    | 84.56  | 34.10 | 137.24 | 56    |       |    |
|                               |                 |       | Non-Hispanic White | 1992  | 3,918  | 3,262 | 4,970  | 59    | 71.81  | 59.79 | 91.09 | 52 |
|                               |                 |       |                    | 1993  | 3,374  | 2,091 | 4,675  | 62    | 61.49  | 38.10 | 85.20 | 56 |
|                               |                 |       |                    | 1994  | 3,696  | 3,242 | 4,381  | 61    | 66.96  | 58.74 | 79.36 | 55 |
|                               |                 |       |                    | 1995  | 3,407  | 2,773 | 4,128  | 63    | 61.03  | 49.68 | 73.94 | 58 |
| 1996                          | 3,438           |       |                    | 2,938 | 3,891  | 63    | 60.98  | 52.12 | 69.02  | 59    |       |    |
| 1997                          | 3,498           |       |                    | 2,789 | 3,931  | 61    | 61.22  | 48.81 | 68.80  | 59    |       |    |
| 1998                          | 3,590           |       |                    | 2,674 | 4,130  | 58    | 62.05  | 46.21 | 71.38  | 59    |       |    |
| 1999                          | 3,396           |       |                    | 2,557 | 4,337  | 68    | 57.95  | 43.63 | 74.02  | 65    |       |    |
| 2000                          | 3,808           |       |                    | 2,453 | 5,130  | 54    | 64.13  | 41.30 | 86.38  | 60    |       |    |
| 2001                          | 3,380           |       |                    | 2,444 | 4,746  | 67    | 56.12  | 40.59 | 78.81  | 71    |       |    |
| 2002                          | 3,993           |       |                    | 2,625 | 5,694  | 52    | 65.21  | 42.86 | 92.97  | 60    |       |    |
| 2003                          | 4,055           |       |                    | 2,631 | 5,607  | 51    | 65.43  | 42.45 | 90.48  | 58    |       |    |
| 2004                          | 4,180           |       |                    | 2,465 | 5,435  | 52    | 66.78  | 39.38 | 86.83  | 58    |       |    |
| 2005                          | 4,404           |       |                    | 2,299 | 5,203  | 51    | 69.83  | 36.45 | 82.50  | 54    |       |    |
| 2006                          | 4,617           |       |                    | 2,129 | 6,435  | 49    | 72.89  | 33.62 | 101.60 | 54    |       |    |
| 2007                          | 4,830           | 1,948 | 7,839              | 48    | 76.11  | 30.69 | 123.53 | 52    |        |       |       |    |

| Metropolitan Statistical Area | PWID Population    | Year     | Number | Min   | Max   | Rank   | Rate   | Min    | Max    | Rank   |    |
|-------------------------------|--------------------|----------|--------|-------|-------|--------|--------|--------|--------|--------|----|
| Monmouth--Ocean, NJ           | Non-Hispanic Black | 1992     | 1,976  | 1,646 | 2,507 | 55     | 515.19 | 428.97 | 653.49 | 16     |    |
|                               |                    | 1993     | 1,626  | 1,007 | 2,253 | 58     | 421.93 | 261.45 | 584.66 | 18     |    |
|                               |                    | 1994     | 1,679  | 1,472 | 1,989 | 60     | 431.37 | 378.36 | 511.20 | 17     |    |
|                               |                    | 1995     | 1,442  | 1,173 | 1,747 | 60     | 365.99 | 297.94 | 443.44 | 20     |    |
|                               |                    | 1996     | 1,343  | 1,148 | 1,520 | 63     | 336.94 | 287.95 | 381.36 | 21     |    |
|                               |                    | 1997     | 1,253  | 999   | 1,409 | 63     | 310.17 | 247.31 | 348.61 | 22     |    |
|                               |                    | 1998     | 1,175  | 875   | 1,352 | 63     | 287.01 | 213.78 | 330.20 | 23     |    |
|                               |                    | 1999     | 1,014  | 763   | 1,295 | 66     | 245.23 | 184.65 | 313.21 | 31     |    |
|                               |                    | 2000     | 1,039  | 669   | 1,400 | 65     | 248.48 | 160.03 | 334.70 | 25     |    |
|                               |                    | 2001     | 847    | 613   | 1,189 | 67     | 198.40 | 143.48 | 278.58 | 41     |    |
|                               |                    | 2002     | 927    | 609   | 1,321 | 66     | 213.98 | 140.64 | 305.10 | 29     |    |
|                               |                    | 2003     | 882    | 572   | 1,219 | 66     | 201.53 | 130.76 | 278.67 | 32     |    |
|                               |                    | 2004     | 865    | 510   | 1,124 | 68     | 195.50 | 115.27 | 254.20 | 33     |    |
|                               |                    | 2005     | 884    | 461   | 1,044 | 68     | 198.44 | 103.58 | 234.45 | 31     |    |
|                               |                    | 2006     | 919    | 424   | 1,281 | 67     | 205.86 | 94.94  | 286.94 | 31     |    |
|                               | 2007               | 981      | 396    | 1,592 | 67    | 218.54 | 88.13  | 354.70 | 29     |        |    |
|                               |                    | Hispanic | 1992   | 526   | 438   | 668    | 53     | 192.07 | 159.93 | 243.63 | 34 |
|                               |                    |          | 1993   | 371   | 230   | 513    | 58     | 126.97 | 78.68  | 175.94 | 44 |
|                               |                    |          | 1994   | 350   | 307   | 415    | 58     | 113.49 | 99.55  | 134.50 | 49 |
|                               |                    |          | 1995   | 292   | 238   | 354    | 60     | 89.06  | 72.50  | 107.91 | 53 |
|                               |                    |          | 1996   | 279   | 238   | 315    | 60     | 79.70  | 68.11  | 90.21  | 57 |
| 1997                          |                    |          | 277    | 221   | 312   | 61     | 74.59  | 59.48  | 83.84  | 55     |    |
| 1998                          |                    |          | 286    | 213   | 329   | 61     | 72.68  | 54.14  | 83.62  | 56     |    |
| 1999                          |                    |          | 278    | 209   | 355   | 63     | 67.01  | 50.46  | 85.59  | 62     |    |
| 2000                          |                    |          | 324    | 208   | 436   | 62     | 74.03  | 47.68  | 99.72  | 55     |    |
| 2001                          |                    |          | 300    | 217   | 421   | 63     | 64.60  | 46.72  | 90.71  | 61     |    |
| 2002                          |                    |          | 370    | 243   | 528   | 61     | 75.03  | 49.31  | 106.97 | 52     |    |
| 2003                          |                    |          | 389    | 252   | 538   | 61     | 74.72  | 48.48  | 103.32 | 51     |    |
| 2004                          |                    |          | 409    | 241   | 532   | 60     | 75.40  | 44.46  | 98.05  | 51     |    |
| 2005                          |                    |          | 430    | 225   | 508   | 61     | 76.40  | 39.88  | 90.27  | 49     |    |
| 2006                          |                    |          | 438    | 202   | 611   | 61     | 75.14  | 34.66  | 104.74 | 49     |    |
| 2007                          | 431                | 174      | 699    | 61    | 71.18 | 28.70  | 115.52 | 55     |        |        |    |

| Metropolitan Statistical Area | PWID Population | Year   | Number | Min   | Max   | Rank   | Rate   | Min    | Max    | Rank   |    |
|-------------------------------|-----------------|--------|--------|-------|-------|--------|--------|--------|--------|--------|----|
| Monmouth--Ocean, NJ           | Male            | 1992   | 4,218  | 3,512 | 5,351 | 67     | 136.92 | 114.01 | 173.68 | 54     |    |
|                               |                 | 1993   | 3,548  | 2,199 | 4,917 | 72     | 114.08 | 70.69  | 158.07 | 59     |    |
|                               |                 | 1994   | 3,808  | 3,340 | 4,512 | 73     | 121.20 | 106.31 | 143.63 | 56     |    |
|                               |                 | 1995   | 3,445  | 2,805 | 4,174 | 74     | 107.99 | 87.91  | 130.85 | 62     |    |
|                               |                 | 1996   | 3,421  | 2,924 | 3,872 | 75     | 105.74 | 90.37  | 119.68 | 62     |    |
|                               |                 | 1997   | 3,430  | 2,735 | 3,855 | 74     | 104.17 | 83.06  | 117.08 | 61     |    |
|                               |                 | 1998   | 3,473  | 2,587 | 3,995 | 72     | 103.73 | 77.26  | 119.34 | 60     |    |
|                               |                 | 1999   | 3,243  | 2,442 | 4,142 | 81     | 95.35  | 71.79  | 121.78 | 67     |    |
|                               |                 | 2000   | 3,589  | 2,311 | 4,834 | 69     | 103.75 | 66.81  | 139.74 | 60     |    |
|                               |                 | 2001   | 3,141  | 2,272 | 4,411 | 82     | 89.01  | 64.38  | 124.99 | 69     |    |
|                               |                 | 2002   | 3,656  | 2,403 | 5,213 | 69     | 101.30 | 66.58  | 144.43 | 60     |    |
|                               |                 | 2003   | 3,650  | 2,368 | 5,047 | 69     | 99.39  | 64.49  | 137.44 | 61     |    |
|                               |                 | 2004   | 3,690  | 2,175 | 4,797 | 68     | 99.02  | 58.39  | 128.75 | 60     |    |
|                               |                 | 2005   | 3,798  | 1,982 | 4,487 | 66     | 100.69 | 52.56  | 118.96 | 60     |    |
|                               | 2006            | 3,872  | 1,786  | 5,397 | 66    | 101.82 | 46.96  | 141.93 | 57     |        |    |
|                               | 2007            | 3,914  | 1,579  | 6,353 | 68    | 102.18 | 41.21  | 165.84 | 57     |        |    |
|                               |                 | Female | 1992   | 2,523 | 2,101 | 3,201  | 61     | 79.10  | 65.86  | 100.34 | 43 |
|                               |                 |        | 1993   | 2,164 | 1,341 | 2,998  | 64     | 67.18  | 41.63  | 93.08  | 49 |
|                               |                 |        | 1994   | 2,347 | 2,059 | 2,782  | 64     | 72.16  | 63.30  | 85.52  | 48 |
|                               |                 |        | 1995   | 2,132 | 1,736 | 2,584  | 67     | 64.61  | 52.60  | 78.29  | 56 |
|                               |                 |        | 1996   | 2,115 | 1,807 | 2,393  | 67     | 63.16  | 53.98  | 71.49  | 57 |
|                               |                 |        | 1997   | 2,109 | 1,682 | 2,371  | 68     | 61.95  | 49.39  | 69.63  | 57 |
|                               |                 |        | 1998   | 2,120 | 1,579 | 2,439  | 68     | 61.31  | 45.67  | 70.53  | 57 |
|                               |                 |        | 1999   | 1,965 | 1,479 | 2,509  | 74     | 55.87  | 42.07  | 71.36  | 66 |
|                               |                 |        | 2000   | 2,160 | 1,391 | 2,910  | 68     | 60.39  | 38.89  | 81.35  | 60 |
|                               |                 |        | 2001   | 1,884 | 1,362 | 2,645  | 78     | 51.73  | 37.41  | 72.64  | 72 |
|                               | 2002            |        | 2,193  | 1,441 | 3,127 | 67     | 59.03  | 38.80  | 84.17  | 61     |    |
|                               | 2003            |        | 2,202  | 1,429 | 3,045 | 66     | 58.43  | 37.91  | 80.79  | 61     |    |
|                               | 2004            | 2,255  | 1,330  | 2,933 | 65    | 59.16  | 34.88  | 76.93  | 59     |        |    |
|                               | 2005            | 2,374  | 1,239  | 2,805 | 66    | 61.71  | 32.21  | 72.91  | 55     |        |    |
|                               | 2006            | 2,501  | 1,154  | 3,486 | 64    | 64.59  | 29.79  | 90.03  | 54     |        |    |
|                               | 2007            | 2,648  | 1,068  | 4,298 | 56    | 68.10  | 27.46  | 110.53 | 45     |        |    |

| Metropolitan Statistical Area | PWID Population | Year        | Number | Min   | Max   | Rank   | Rate   | Min    | Max    | Rank   |    |
|-------------------------------|-----------------|-------------|--------|-------|-------|--------|--------|--------|--------|--------|----|
| Monmouth--Ocean, NJ           | Young (15-29)   | 1992        | 1,682  | 1,400 | 2,133 | 66     | 91.69  | 76.35  | 116.31 | 49     |    |
|                               |                 | 1993        | 1,592  | 987   | 2,206 | 63     | 88.54  | 54.86  | 122.68 | 47     |    |
|                               |                 | 1994        | 1,904  | 1,670 | 2,256 | 55     | 107.71 | 94.48  | 127.64 | 33     |    |
|                               |                 | 1995        | 1,899  | 1,546 | 2,301 | 53     | 108.27 | 88.13  | 131.18 | 34     |    |
|                               |                 | 1996        | 2,056  | 1,757 | 2,327 | 51     | 118.03 | 100.87 | 133.59 | 31     |    |
|                               |                 | 1997        | 2,223  | 1,772 | 2,498 | 48     | 127.61 | 101.75 | 143.42 | 25     |    |
|                               |                 | 1998        | 2,402  | 1,789 | 2,764 | 45     | 137.11 | 102.13 | 157.74 | 18     |    |
|                               |                 | 1999        | 2,370  | 1,785 | 3,027 | 51     | 134.42 | 101.21 | 171.68 | 26     |    |
|                               |                 | 2000        | 2,747  | 1,769 | 3,700 | 43     | 154.29 | 99.36  | 207.82 | 17     |    |
|                               |                 | 2001        | 2,496  | 1,805 | 3,505 | 51     | 136.92 | 99.02  | 192.25 | 27     |    |
|                               |                 | 2002        | 2,994  | 1,968 | 4,269 | 43     | 158.82 | 104.39 | 226.44 | 18     |    |
|                               |                 | 2003        | 3,060  | 1,985 | 4,231 | 41     | 157.31 | 102.07 | 217.53 | 19     |    |
|                               |                 | 2004        | 3,146  | 1,855 | 4,091 | 41     | 157.14 | 92.66  | 204.33 | 19     |    |
|                               |                 | 2005        | 3,277  | 1,710 | 3,871 | 40     | 159.32 | 83.15  | 188.22 | 18     |    |
|                               |                 | 2006        | 3,361  | 1,550 | 4,685 | 39     | 160.20 | 73.89  | 223.31 | 20     |    |
|                               | 2007            | 3,403       | 1,373  | 5,524 | 41    | 159.43 | 64.29  | 258.75 | 20     |        |    |
|                               |                 | Old (30-64) | 1992   | 5,125 | 4,267 | 6,501  | 61     | 115.51 | 96.18  | 146.52 | 51 |
|                               |                 |             | 1993   | 4,151 | 2,572 | 5,752  | 68     | 91.57  | 56.74  | 126.89 | 65 |
|                               |                 |             | 1994   | 4,264 | 3,740 | 5,054  | 71     | 92.17  | 80.84  | 109.23 | 69 |
|                               |                 |             | 1995   | 3,680 | 2,996 | 4,459  | 78     | 77.69  | 63.25  | 94.13  | 74 |
|                               |                 |             | 1996   | 3,478 | 2,973 | 3,937  | 79     | 71.84  | 61.40  | 81.32  | 77 |
|                               | 1997            |             | 3,318  | 2,646 | 3,730 | 79     | 66.97  | 53.40  | 75.27  | 78     |    |
|                               | 1998            |             | 3,202  | 2,385 | 3,683 | 79     | 63.34  | 47.18  | 72.87  | 80     |    |
|                               | 1999            |             | 2,857  | 2,151 | 3,648 | 86     | 55.42  | 41.73  | 70.78  | 87     |    |
|                               | 2000            |             | 3,033  | 1,953 | 4,086 | 80     | 57.70  | 37.16  | 77.72  | 84     |    |
|                               | 2001            |             | 2,560  | 1,851 | 3,595 | 86     | 47.88  | 34.62  | 67.22  | 93     |    |
|                               | 2002            | 2,890       | 1,899  | 4,120 | 82    | 53.13  | 34.92  | 75.75  | 84     |        |    |
|                               | 2003            | 2,816       | 1,827  | 3,894 | 82    | 51.24  | 33.24  | 70.85  | 86     |        |    |
|                               | 2004            | 2,799       | 1,650  | 3,639 | 81    | 50.55  | 29.81  | 65.73  | 84     |        |    |
|                               | 2005            | 2,854       | 1,490  | 3,372 | 81    | 51.31  | 26.78  | 60.62  | 80     |        |    |
|                               | 2006            | 2,906       | 1,340  | 4,051 | 81    | 52.11  | 24.04  | 72.64  | 77     |        |    |
|                               | 2007            | 2,964       | 1,195  | 4,811 | 78    | 53.07  | 21.40  | 86.13  | 73     |        |    |

| Metropolitan Statistical Area | PWID Population | Year  | Number             | Min   | Max    | Rank  | Rate   | Min   | Max    | Rank  |        |    |
|-------------------------------|-----------------|-------|--------------------|-------|--------|-------|--------|-------|--------|-------|--------|----|
| Nashville, TN                 | Total           | 1992  | 7,215              | 5,414 | 9,671  | 60    | 102.61 | 76.99 | 137.53 | 51    |        |    |
|                               |                 | 1993  | 6,112              | 2,433 | 10,255 | 65    | 84.69  | 33.71 | 142.09 | 60    |        |    |
|                               |                 | 1994  | 7,484              | 4,542 | 10,865 | 59    | 100.70 | 61.12 | 146.18 | 49    |        |    |
|                               |                 | 1995  | 6,518              | 3,187 | 11,498 | 64    | 85.20  | 41.66 | 150.28 | 60    |        |    |
|                               |                 | 1996  | 6,738              | 3,601 | 12,151 | 63    | 85.64  | 45.76 | 154.43 | 60    |        |    |
|                               |                 | 1997  | 6,953              | 3,139 | 12,817 | 61    | 86.03  | 38.83 | 158.58 | 57    |        |    |
|                               |                 | 1998  | 7,260              | 3,107 | 13,439 | 54    | 87.95  | 37.63 | 162.79 | 57    |        |    |
|                               |                 | 1999  | 8,460              | 3,061 | 14,033 | 49    | 100.67 | 36.43 | 167.00 | 52    |        |    |
|                               |                 | 2000  | 7,767              | 3,331 | 14,194 | 49    | 90.72  | 38.90 | 165.80 | 54    |        |    |
|                               |                 | 2001  | 8,910              | 3,613 | 14,372 | 47    | 102.04 | 41.38 | 164.59 | 50    |        |    |
|                               |                 | 2002  | 8,229              | 4,058 | 14,370 | 47    | 92.79  | 45.76 | 162.05 | 52    |        |    |
|                               |                 | 2003  | 8,468              | 4,521 | 14,384 | 47    | 93.90  | 50.14 | 159.51 | 51    |        |    |
|                               |                 | 2004  | 8,766              | 5,009 | 14,510 | 47    | 95.10  | 54.35 | 157.42 | 47    |        |    |
|                               |                 | 2005  | 9,082              | 5,530 | 14,668 | 46    | 96.18  | 58.56 | 155.34 | 47    |        |    |
|                               |                 | 2006  | 9,394              | 6,013 | 14,819 | 44    | 97.07  | 62.13 | 153.13 | 44    |        |    |
|                               |                 | 2007  | 9,692              | 6,506 | 14,946 | 44    | 97.87  | 65.70 | 150.93 | 42    |        |    |
|                               |                 |       | Non-Hispanic White | 1992  | 4,044  | 3,035 | 5,421  | 56    | 69.56  | 52.19 | 93.24  | 53 |
|                               |                 |       |                    | 1993  | 3,452  | 1,374 | 5,791  | 61    | 58.14  | 23.14 | 97.55  | 61 |
|                               |                 |       |                    | 1994  | 4,275  | 2,595 | 6,206  | 54    | 70.24  | 42.63 | 101.97 | 52 |
|                               |                 |       |                    | 1995  | 3,778  | 1,847 | 6,664  | 56    | 60.59  | 29.63 | 106.87 | 59 |
| 1996                          | 3,971           |       |                    | 2,122 | 7,161  | 51    | 62.29  | 33.28 | 112.32 | 57    |        |    |
| 1997                          | 4,172           |       |                    | 1,883 | 7,691  | 47    | 64.08  | 28.92 | 118.11 | 58    |        |    |
| 1998                          | 4,439           |       |                    | 1,900 | 8,217  | 45    | 67.14  | 28.73 | 124.28 | 57    |        |    |
| 1999                          | 5,271           |       |                    | 1,907 | 8,743  | 38    | 78.81  | 28.52 | 130.73 | 49    |        |    |
| 2000                          | 4,928           |       |                    | 2,113 | 9,006  | 38    | 72.85  | 31.24 | 133.14 | 55    |        |    |
| 2001                          | 5,751           |       |                    | 2,332 | 9,276  | 37    | 83.79  | 33.98 | 135.14 | 43    |        |    |
| 2002                          | 5,393           |       |                    | 2,660 | 9,419  | 38    | 77.75  | 38.34 | 135.78 | 48    |        |    |
| 2003                          | 5,625           |       |                    | 3,003 | 9,555  | 38    | 80.11  | 42.77 | 136.08 | 44    |        |    |
| 2004                          | 5,887           |       |                    | 3,364 | 9,744  | 35    | 82.48  | 47.14 | 136.52 | 44    |        |    |
| 2005                          | 6,148           |       |                    | 3,743 | 9,930  | 34    | 84.55  | 51.48 | 136.56 | 42    |        |    |
| 2006                          | 6,390           |       |                    | 4,090 | 10,080 | 32    | 86.14  | 55.14 | 135.90 | 43    |        |    |
| 2007                          | 6,600           | 4,430 | 10,177             | 32    | 87.34  | 58.63 | 134.68 | 42    |        |       |        |    |

| Metropolitan Statistical Area | PWID Population    | Year | Number   | Min   | Max   | Rank  | Rate   | Min    | Max    | Rank  |        |    |
|-------------------------------|--------------------|------|----------|-------|-------|-------|--------|--------|--------|-------|--------|----|
| Nashville, TN                 | Non-Hispanic Black | 1992 | 2,984    | 2,239 | 3,999 | 38    | 285.41 | 214.16 | 382.56 | 53    |        |    |
|                               |                    | 1993 | 2,416    | 962   | 4,054 | 41    | 222.70 | 88.64  | 373.63 | 56    |        |    |
|                               |                    | 1994 | 2,819    | 1,711 | 4,093 | 36    | 251.44 | 152.61 | 365.02 | 57    |        |    |
|                               |                    | 1995 | 2,333    | 1,141 | 4,115 | 39    | 201.57 | 98.56  | 355.55 | 59    |        |    |
|                               |                    | 1996 | 2,285    | 1,221 | 4,120 | 38    | 191.10 | 102.12 | 344.59 | 61    |        |    |
|                               |                    | 1997 | 2,228    | 1,006 | 4,108 | 37    | 180.58 | 81.51  | 332.87 | 61    |        |    |
|                               |                    | 1998 | 2,195    | 939   | 4,063 | 37    | 174.09 | 74.49  | 322.25 | 58    |        |    |
|                               |                    | 1999 | 2,409    | 872   | 3,997 | 37    | 187.81 | 67.96  | 311.55 | 49    |        |    |
|                               |                    | 2000 | 2,083    | 893   | 3,806 | 37    | 159.01 | 68.19  | 290.60 | 58    |        |    |
|                               |                    | 2001 | 2,250    | 912   | 3,629 | 38    | 166.96 | 67.70  | 269.31 | 58    |        |    |
|                               |                    | 2002 | 1,958    | 966   | 3,420 | 38    | 142.05 | 70.05  | 248.07 | 58    |        |    |
|                               |                    | 2003 | 1,904    | 1,017 | 3,234 | 36    | 134.89 | 72.02  | 229.14 | 61    |        |    |
|                               |                    | 2004 | 1,869    | 1,068 | 3,093 | 35    | 128.33 | 73.34  | 212.43 | 61    |        |    |
|                               |                    | 2005 | 1,845    | 1,123 | 2,980 | 35    | 122.51 | 74.59  | 197.86 | 62    |        |    |
|                               |                    | 2006 | 1,832    | 1,172 | 2,890 | 37    | 117.93 | 75.49  | 186.04 | 64    |        |    |
|                               |                    | 2007 | 1,832    | 1,230 | 2,825 | 41    | 114.94 | 77.16  | 177.25 | 65    |        |    |
|                               |                    |      | Hispanic | 1992  | 68    | 51    | 91     | 82     | 95.73  | 71.83 | 128.31 | 62 |
|                               |                    |      |          | 1993  | 58    | 23    | 97     | 83     | 69.75  | 27.76 | 117.02 | 66 |
|                               |                    |      |          | 1994  | 73    | 44    | 105    | 82     | 72.42  | 43.95 | 105.13 | 71 |
|                               |                    |      |          | 1995  | 65    | 32    | 115    | 83     | 53.74  | 26.28 | 94.79  | 75 |
| 1996                          | 71                 |      |          | 38    | 127   | 82    | 47.76  | 25.52  | 86.12  | 77    |        |    |
| 1997                          | 77                 |      |          | 35    | 141   | 81    | 43.28  | 19.53  | 79.77  | 78    |        |    |
| 1998                          | 84                 |      |          | 36    | 156   | 81    | 39.33  | 16.83  | 72.81  | 77    |        |    |
| 1999                          | 104                |      |          | 37    | 172   | 78    | 41.00  | 14.84  | 68.02  | 77    |        |    |
| 2000                          | 100                |      |          | 43    | 183   | 78    | 33.87  | 14.52  | 61.90  | 79    |        |    |
| 2001                          | 121                |      |          | 49    | 195   | 77    | 37.47  | 15.19  | 60.44  | 79    |        |    |
| 2002                          | 116                |      |          | 57    | 203   | 77    | 33.86  | 16.70  | 59.13  | 77    |        |    |
| 2003                          | 124                |      |          | 66    | 211   | 78    | 33.92  | 18.11  | 57.62  | 76    |        |    |
| 2004                          | 132                |      |          | 76    | 219   | 78    | 33.50  | 19.14  | 55.45  | 76    |        |    |
| 2005                          | 139                |      |          | 85    | 225   | 77    | 32.87  | 20.01  | 53.09  | 78    |        |    |
| 2006                          | 145                | 93   | 229      | 77    | 31.97 | 20.46 | 50.43  | 78     |        |       |        |    |
| 2007                          | 149                | 100  | 229      | 79    | 30.58 | 20.53 | 47.17  | 80     |        |       |        |    |

| Metropolitan Statistical Area | PWID Population | Year  | Number | Min   | Max   | Rank   | Rate   | Min    | Max    | Rank |
|-------------------------------|-----------------|-------|--------|-------|-------|--------|--------|--------|--------|------|
| Nashville, TN                 | Male            | 1992  | 4,792  | 3,596 | 6,423 | 58     | 139.38 | 104.58 | 186.81 | 51   |
|                               |                 | 1993  | 4,073  | 1,621 | 6,833 | 66     | 115.23 | 45.87  | 193.33 | 58   |
|                               |                 | 1994  | 5,001  | 3,035 | 7,260 | 58     | 137.23 | 83.29  | 199.22 | 48   |
|                               |                 | 1995  | 4,365  | 2,135 | 7,700 | 62     | 116.19 | 56.81  | 204.94 | 58   |
|                               |                 | 1996  | 4,519  | 2,415 | 8,150 | 58     | 116.76 | 62.40  | 210.55 | 55   |
|                               |                 | 1997  | 4,666  | 2,106 | 8,601 | 56     | 117.29 | 52.94  | 216.20 | 51   |
|                               |                 | 1998  | 4,870  | 2,084 | 9,014 | 52     | 119.57 | 51.16  | 221.34 | 51   |
|                               |                 | 1999  | 5,664  | 2,049 | 9,395 | 46     | 136.27 | 49.31  | 226.05 | 44   |
|                               |                 | 2000  | 5,183  | 2,222 | 9,471 | 48     | 122.11 | 52.36  | 223.16 | 48   |
|                               |                 | 2001  | 5,916  | 2,399 | 9,542 | 45     | 136.58 | 55.38  | 220.29 | 43   |
|                               |                 | 2002  | 5,425  | 2,675 | 9,474 | 45     | 123.28 | 60.79  | 215.30 | 45   |
|                               |                 | 2003  | 5,531  | 2,953 | 9,395 | 45     | 123.72 | 66.06  | 210.16 | 43   |
|                               |                 | 2004  | 5,658  | 3,234 | 9,366 | 45     | 123.60 | 70.64  | 204.60 | 43   |
|                               |                 | 2005  | 5,776  | 3,517 | 9,329 | 46     | 123.11 | 74.96  | 198.83 | 44   |
|                               | 2006            | 5,867 | 3,756  | 9,256 | 44    | 122.20 | 78.22  | 192.79 | 45     |      |
|                               | 2007            | 5,922 | 3,975  | 9,132 | 44    | 120.30 | 80.76  | 185.51 | 44     |      |
|                               | Female          | 1992  | 2,525  | 1,895 | 3,384 | 60     | 70.27  | 52.73  | 94.19  | 49   |
|                               |                 | 1993  | 2,095  | 834   | 3,514 | 65     | 56.88  | 22.64  | 95.43  | 63   |
|                               |                 | 1994  | 2,546  | 1,545 | 3,696 | 61     | 67.21  | 40.79  | 97.57  | 57   |
|                               |                 | 1995  | 2,227  | 1,089 | 3,928 | 64     | 57.19  | 27.97  | 100.88 | 61   |
|                               |                 | 1996  | 2,334  | 1,247 | 4,208 | 61     | 58.38  | 31.20  | 105.27 | 61   |
|                               |                 | 1997  | 2,458  | 1,110 | 4,531 | 59     | 59.90  | 27.04  | 110.42 | 58   |
|                               |                 | 1998  | 2,632  | 1,126 | 4,872 | 56     | 62.93  | 26.93  | 116.48 | 56   |
|                               |                 | 1999  | 3,152  | 1,141 | 5,229 | 49     | 74.23  | 26.86  | 123.14 | 48   |
|                               |                 | 2000  | 2,975  | 1,276 | 5,437 | 47     | 68.92  | 29.55  | 125.95 | 54   |
|                               |                 | 2001  | 3,502  | 1,420 | 5,649 | 44     | 79.58  | 32.27  | 128.35 | 41   |
| 2002                          |                 | 3,305 | 1,630  | 5,772 | 44    | 73.98  | 36.48  | 129.19 | 43     |      |
| 2003                          |                 | 3,456 | 1,846  | 5,871 | 43    | 76.01  | 40.58  | 129.12 | 39     |      |
| 2004                          | 3,609           | 2,063 | 5,974  | 42    | 77.79 | 44.46  | 128.77 | 38     |        |      |
| 2005                          | 3,737           | 2,275 | 6,035  | 41    | 78.67 | 47.90  | 127.05 | 35     |        |      |
| 2006                          | 3,820           | 2,445 | 6,026  | 40    | 78.33 | 50.14  | 123.58 | 35     |        |      |
| 2007                          | 3,842           | 2,579 | 5,925  | 38    | 77.15 | 51.79  | 118.97 | 35     |        |      |

| Metropolitan Statistical Area | PWID Population | Year  | Number      | Min   | Max    | Rank  | Rate   | Min   | Max    | Rank  |        |    |
|-------------------------------|-----------------|-------|-------------|-------|--------|-------|--------|-------|--------|-------|--------|----|
| Nashville, TN                 | Young (15-29)   | 1992  | 2,399       | 1,800 | 3,215  | 48    | 99.51  | 74.67 | 133.38 | 41    |        |    |
|                               |                 | 1993  | 1,773       | 706   | 2,975  | 55    | 72.71  | 28.94 | 121.99 | 56    |        |    |
|                               |                 | 1994  | 1,955       | 1,186 | 2,838  | 53    | 79.00  | 47.95 | 114.68 | 56    |        |    |
|                               |                 | 1995  | 1,582       | 774   | 2,791  | 65    | 62.76  | 30.69 | 110.70 | 58    |        |    |
|                               |                 | 1996  | 1,568       | 838   | 2,828  | 65    | 60.87  | 32.53 | 109.76 | 61    |        |    |
|                               |                 | 1997  | 1,596       | 720   | 2,941  | 66    | 60.56  | 27.34 | 111.63 | 64    |        |    |
|                               |                 | 1998  | 1,684       | 721   | 3,117  | 65    | 62.82  | 26.88 | 116.29 | 63    |        |    |
|                               |                 | 1999  | 2,024       | 732   | 3,358  | 60    | 74.74  | 27.05 | 123.99 | 62    |        |    |
|                               |                 | 2000  | 1,948       | 835   | 3,560  | 59    | 71.24  | 30.55 | 130.20 | 64    |        |    |
|                               |                 | 2001  | 2,370       | 961   | 3,823  | 54    | 86.38  | 35.03 | 139.32 | 60    |        |    |
|                               |                 | 2002  | 2,338       | 1,153 | 4,082  | 52    | 85.54  | 42.18 | 149.39 | 57    |        |    |
|                               |                 | 2003  | 2,576       | 1,375 | 4,375  | 49    | 93.72  | 50.04 | 159.20 | 53    |        |    |
|                               |                 | 2004  | 2,851       | 1,629 | 4,719  | 45    | 101.79 | 58.17 | 168.50 | 51    |        |    |
|                               |                 | 2005  | 3,143       | 1,914 | 5,076  | 41    | 110.15 | 67.07 | 177.90 | 41    |        |    |
|                               |                 | 2006  | 3,430       | 2,195 | 5,411  | 38    | 118.03 | 75.55 | 186.20 | 33    |        |    |
|                               |                 | 2007  | 3,693       | 2,479 | 5,695  | 37    | 124.33 | 83.47 | 191.73 | 32    |        |    |
|                               |                 |       | Old (30-64) | 1992  | 4,853  | 3,641 | 6,505  | 63    | 105.02 | 78.80 | 140.76 | 59 |
|                               |                 |       |             | 1993  | 4,359  | 1,735 | 7,314  | 66    | 91.23  | 36.32 | 153.07 | 66 |
|                               |                 |       |             | 1994  | 5,562  | 3,376 | 8,075  | 60    | 112.18 | 68.09 | 162.86 | 49 |
|                               |                 |       |             | 1995  | 4,984  | 2,437 | 8,791  | 61    | 97.16  | 47.51 | 171.37 | 59 |
| 1996                          | 5,247           |       |             | 2,804 | 9,462  | 56    | 99.15  | 52.99 | 178.80 | 57    |        |    |
| 1997                          | 5,470           |       |             | 2,469 | 10,082 | 55    | 100.41 | 45.32 | 185.09 | 54    |        |    |
| 1998                          | 5,729           |       |             | 2,451 | 10,604 | 48    | 102.75 | 43.97 | 190.20 | 51    |        |    |
| 1999                          | 6,651           |       |             | 2,407 | 11,033 | 46    | 116.79 | 42.26 | 193.73 | 40    |        |    |
| 2000                          | 6,045           |       |             | 2,592 | 11,047 | 44    | 103.74 | 44.49 | 189.59 | 45    |        |    |
| 2001                          | 6,819           |       |             | 2,765 | 10,999 | 42    | 113.88 | 46.18 | 183.68 | 40    |        |    |
| 2002                          | 6,148           |       |             | 3,032 | 10,736 | 42    | 100.20 | 49.41 | 174.99 | 45    |        |    |
| 2003                          | 6,127           |       |             | 3,271 | 10,408 | 42    | 97.73  | 52.18 | 166.01 | 46    |        |    |
| 2004                          | 6,087           |       |             | 3,479 | 10,076 | 44    | 94.87  | 54.22 | 157.04 | 45    |        |    |
| 2005                          | 5,988           |       |             | 3,646 | 9,672  | 45    | 90.88  | 55.34 | 146.78 | 45    |        |    |
| 2006                          | 5,809           | 3,718 | 9,164       | 45    | 85.79  | 54.91 | 135.34 | 46    |        |       |        |    |
| 2007                          | 5,541           | 3,720 | 8,545       | 46    | 79.93  | 53.66 | 123.26 | 48    |        |       |        |    |



| Metropolitan Statistical Area | PWID Population | Year  | Number             | Min   | Max    | Rank  | Rate  | Min   | Max    | Rank  |       |    |
|-------------------------------|-----------------|-------|--------------------|-------|--------|-------|-------|-------|--------|-------|-------|----|
| Nassau--Suffolk, NY           | Total           | 1992  | 9,457              | 5,813 | 13,604 | 47    | 53.61 | 32.95 | 77.12  | 94    |       |    |
|                               |                 | 1993  | 9,604              | 5,835 | 13,583 | 43    | 54.54 | 33.13 | 77.14  | 89    |       |    |
|                               |                 | 1994  | 9,501              | 5,837 | 13,549 | 43    | 54.10 | 33.24 | 77.15  | 93    |       |    |
|                               |                 | 1995  | 10,280             | 5,848 | 13,535 | 41    | 58.61 | 33.34 | 77.17  | 83    |       |    |
|                               |                 | 1996  | 10,629             | 5,850 | 13,835 | 39    | 60.57 | 33.34 | 78.85  | 81    |       |    |
|                               |                 | 1997  | 11,006             | 5,870 | 15,163 | 36    | 62.51 | 33.34 | 86.12  | 78    |       |    |
|                               |                 | 1998  | 11,439             | 5,905 | 16,595 | 34    | 64.45 | 33.27 | 93.51  | 75    |       |    |
|                               |                 | 1999  | 9,809              | 5,933 | 13,800 | 43    | 54.89 | 33.20 | 77.22  | 89    |       |    |
|                               |                 | 2000  | 12,107             | 5,935 | 18,890 | 33    | 67.25 | 32.96 | 104.92 | 69    |       |    |
|                               |                 | 2001  | 9,941              | 5,971 | 14,096 | 44    | 54.49 | 32.72 | 77.25  | 90    |       |    |
|                               |                 | 2002  | 12,505             | 5,973 | 19,997 | 32    | 67.75 | 32.36 | 108.34 | 69    |       |    |
|                               |                 | 2003  | 12,424             | 5,971 | 19,489 | 32    | 66.57 | 31.99 | 104.43 | 71    |       |    |
|                               |                 | 2004  | 12,217             | 5,948 | 18,543 | 34    | 64.84 | 31.57 | 98.42  | 74    |       |    |
|                               |                 | 2005  | 11,930             | 5,907 | 17,370 | 38    | 62.91 | 31.15 | 91.59  | 74    |       |    |
|                               |                 | 2006  | 11,605             | 5,868 | 16,092 | 36    | 60.88 | 30.78 | 84.42  | 76    |       |    |
|                               |                 | 2007  | 11,255             | 5,826 | 14,815 | 38    | 58.76 | 30.42 | 77.34  | 80    |       |    |
|                               |                 |       | Non-Hispanic White | 1992  | 6,187  | 3,803 | 8,900 | 37    | 42.81  | 26.31 | 61.58 | 84 |
|                               |                 |       |                    | 1993  | 6,350  | 3,858 | 8,981 | 32    | 44.45  | 27.01 | 62.87 | 76 |
|                               |                 |       |                    | 1994  | 6,308  | 3,875 | 8,996 | 34    | 44.72  | 27.47 | 63.77 | 81 |
|                               |                 |       |                    | 1995  | 6,821  | 3,880 | 8,980 | 29    | 48.89  | 27.81 | 64.37 | 68 |
| 1996                          | 7,022           |       |                    | 3,865 | 9,140  | 28    | 50.80 | 27.96 | 66.13  | 68    |       |    |
| 1997                          | 7,223           |       |                    | 3,852 | 9,951  | 27    | 52.58 | 28.04 | 72.44  | 66    |       |    |
| 1998                          | 7,447           |       |                    | 3,844 | 10,805 | 26    | 54.28 | 28.02 | 78.76  | 65    |       |    |
| 1999                          | 6,335           |       |                    | 3,832 | 8,913  | 33    | 46.29 | 27.99 | 65.12  | 75    |       |    |
| 2000                          | 7,766           |       |                    | 3,807 | 12,117 | 26    | 56.85 | 27.86 | 88.70  | 67    |       |    |
| 2001                          | 6,348           |       |                    | 3,813 | 9,001  | 33    | 46.35 | 27.84 | 65.72  | 78    |       |    |
| 2002                          | 7,978           |       |                    | 3,810 | 12,758 | 25    | 58.15 | 27.78 | 93.00  | 65    |       |    |
| 2003                          | 7,957           |       |                    | 3,824 | 12,482 | 25    | 57.88 | 27.81 | 90.79  | 65    |       |    |
| 2004                          | 7,901           |       |                    | 3,847 | 11,992 | 26    | 57.32 | 27.91 | 87.01  | 67    |       |    |
| 2005                          | 7,841           |       |                    | 3,882 | 11,416 | 27    | 56.87 | 28.16 | 82.80  | 68    |       |    |
| 2006                          | 7,804           |       |                    | 3,946 | 10,821 | 26    | 56.66 | 28.65 | 78.56  | 68    |       |    |
| 2007                          | 7,795           | 4,035 | 10,260             | 28    | 56.68  | 29.34 | 74.60 | 72    |        |       |       |    |

| Metropolitan Statistical Area | PWID Population    | Year | Number   | Min   | Max   | Rank  | Rate   | Min   | Max    | Rank  |       |    |
|-------------------------------|--------------------|------|----------|-------|-------|-------|--------|-------|--------|-------|-------|----|
| Nassau--Suffolk, NY           | Non-Hispanic Black | 1992 | 1,883    | 1,158 | 2,709 | 57    | 141.97 | 87.26 | 204.22 | 91    |       |    |
|                               |                    | 1993 | 1,916    | 1,164 | 2,710 | 52    | 141.45 | 85.94 | 200.07 | 87    |       |    |
|                               |                    | 1994 | 1,873    | 1,151 | 2,672 | 57    | 135.56 | 83.28 | 193.33 | 89    |       |    |
|                               |                    | 1995 | 1,979    | 1,126 | 2,606 | 47    | 140.33 | 79.82 | 184.76 | 82    |       |    |
|                               |                    | 1996 | 1,978    | 1,089 | 2,574 | 46    | 137.70 | 75.79 | 179.25 | 80    |       |    |
|                               |                    | 1997 | 1,962    | 1,046 | 2,703 | 45    | 133.62 | 71.26 | 184.09 | 78    |       |    |
|                               |                    | 1998 | 1,939    | 1,001 | 2,814 | 43    | 128.90 | 66.54 | 187.02 | 77    |       |    |
|                               |                    | 1999 | 1,574    | 952   | 2,214 | 56    | 102.38 | 61.92 | 144.03 | 85    |       |    |
|                               |                    | 2000 | 1,832    | 898   | 2,858 | 44    | 117.01 | 57.36 | 182.57 | 76    |       |    |
|                               |                    | 2001 | 1,417    | 851   | 2,009 | 59    | 87.55  | 52.58 | 124.13 | 88    |       |    |
|                               |                    | 2002 | 1,680    | 802   | 2,686 | 46    | 101.09 | 48.28 | 161.67 | 78    |       |    |
|                               |                    | 2003 | 1,578    | 758   | 2,475 | 49    | 93.05  | 44.72 | 145.97 | 81    |       |    |
|                               |                    | 2004 | 1,475    | 718   | 2,239 | 54    | 85.57  | 41.66 | 129.88 | 84    |       |    |
|                               |                    | 2005 | 1,382    | 684   | 2,013 | 56    | 79.44  | 39.33 | 115.66 | 84    |       |    |
|                               |                    | 2006 | 1,306    | 660   | 1,811 | 58    | 74.21  | 37.52 | 102.91 | 84    |       |    |
|                               |                    | 2007 | 1,251    | 648   | 1,647 | 60    | 70.29  | 36.39 | 92.52  | 86    |       |    |
|                               |                    |      | Hispanic | 1992  | 696   | 428   | 1,002  | 46    | 52.51  | 32.27 | 75.53 | 86 |
|                               |                    |      |          | 1993  | 715   | 435   | 1,012  | 47    | 51.01  | 30.99 | 72.14 | 81 |
|                               |                    |      |          | 1994  | 728   | 447   | 1,039  | 46    | 49.36  | 30.33 | 70.40 | 83 |
|                               |                    |      |          | 1995  | 821   | 467   | 1,081  | 44    | 52.99  | 30.14 | 69.77 | 76 |
| 1996                          | 893                |      |          | 491   | 1,162 | 42    | 54.85  | 30.19 | 71.40  | 72    |       |    |
| 1997                          | 976                |      |          | 521   | 1,345 | 42    | 57.11  | 30.46 | 78.68  | 69    |       |    |
| 1998                          | 1,072              |      |          | 553   | 1,555 | 42    | 59.65  | 30.79 | 86.54  | 67    |       |    |
| 1999                          | 968                |      |          | 586   | 1,362 | 44    | 51.41  | 31.09 | 72.32  | 72    |       |    |
| 2000                          | 1,250              |      |          | 613   | 1,950 | 41    | 63.21  | 30.98 | 98.63  | 61    |       |    |
| 2001                          | 1,062              |      |          | 638   | 1,506 | 44    | 51.17  | 30.73 | 72.55  | 66    |       |    |
| 2002                          | 1,364              |      |          | 652   | 2,181 | 40    | 62.89  | 30.04 | 100.56 | 60    |       |    |
| 2003                          | 1,361              |      |          | 654   | 2,134 | 41    | 60.19  | 28.92 | 94.41  | 60    |       |    |
| 2004                          | 1,317              |      |          | 641   | 1,998 | 41    | 56.51  | 27.51 | 85.77  | 62    |       |    |
| 2005                          | 1,236              |      |          | 612   | 1,800 | 44    | 51.78  | 25.63 | 75.38  | 63    |       |    |
| 2006                          | 1,126              |      |          | 569   | 1,561 | 49    | 46.06  | 23.29 | 63.87  | 66    |       |    |
| 2007                          | 992                | 514  | 1,306    | 51    | 39.60 | 20.50 | 52.13  | 69    |        |       |       |    |

| Metropolitan Statistical Area | PWID Population | Year   | Number | Min    | Max    | Rank  | Rate  | Min    | Max    | Rank  |    |
|-------------------------------|-----------------|--------|--------|--------|--------|-------|-------|--------|--------|-------|----|
| Nassau--Suffolk, NY           | Male            | 1992   | 6,044  | 3,715  | 8,694  | 46    | 69.63 | 42.80  | 100.17 | 97    |    |
|                               |                 | 1993   | 6,313  | 3,835  | 8,929  | 41    | 72.85 | 44.26  | 103.04 | 89    |    |
|                               |                 | 1994   | 6,388  | 3,924  | 9,110  | 41    | 73.93 | 45.42  | 105.43 | 92    |    |
|                               |                 | 1995   | 7,036  | 4,002  | 9,264  | 39    | 81.53 | 46.38  | 107.35 | 82    |    |
|                               |                 | 1996   | 7,376  | 4,060  | 9,602  | 35    | 85.48 | 47.05  | 111.27 | 77    |    |
|                               |                 | 1997   | 7,719  | 4,117  | 10,634 | 34    | 89.14 | 47.54  | 122.82 | 75    |    |
|                               |                 | 1998   | 8,084  | 4,173  | 11,728 | 33    | 92.61 | 47.81  | 134.36 | 67    |    |
|                               |                 | 1999   | 6,969  | 4,215  | 9,804  | 36    | 79.30 | 47.96  | 111.56 | 80    |    |
|                               |                 | 2000   | 8,629  | 4,230  | 13,463 | 32    | 97.45 | 47.77  | 152.05 | 65    |    |
|                               |                 | 2001   | 7,096  | 4,262  | 10,061 | 36    | 78.96 | 47.43  | 111.96 | 78    |    |
|                               |                 | 2002   | 8,926  | 4,263  | 14,275 | 29    | 98.06 | 46.83  | 156.81 | 64    |    |
|                               |                 | 2003   | 8,859  | 4,258  | 13,897 | 31    | 96.09 | 46.18  | 150.73 | 64    |    |
|                               |                 | 2004   | 8,695  | 4,233  | 13,198 | 31    | 93.33 | 45.44  | 141.66 | 64    |    |
|                               |                 | 2005   | 8,470  | 4,194  | 12,332 | 31    | 90.17 | 44.64  | 131.28 | 65    |    |
|                               | 2006            | 8,216  | 4,154  | 11,393 | 33     | 86.92 | 43.95 | 120.52 | 66     |       |    |
|                               | 2007            | 7,947  | 4,114  | 10,460 | 37     | 83.53 | 43.24 | 109.95 | 69     |       |    |
|                               |                 | Female | 1992   | 2,797  | 1,719  | 4,023 | 56    | 31.21  | 19.18  | 44.90 | 94 |
|                               |                 |        | 1993   | 2,862  | 1,739  | 4,048 | 46    | 32.00  | 19.44  | 45.26 | 89 |
|                               |                 |        | 1994   | 2,848  | 1,749  | 4,061 | 54    | 31.92  | 19.61  | 45.52 | 95 |
|                               |                 |        | 1995   | 3,093  | 1,759  | 4,072 | 45    | 34.71  | 19.74  | 45.70 | 88 |
|                               |                 |        | 1996   | 3,205  | 1,764  | 4,172 | 44    | 35.94  | 19.78  | 46.78 | 88 |
|                               |                 |        | 1997   | 3,320  | 1,771  | 4,575 | 41    | 37.11  | 19.79  | 51.13 | 89 |
|                               |                 |        | 1998   | 3,448  | 1,780  | 5,003 | 40    | 38.23  | 19.74  | 55.47 | 89 |
|                               |                 |        | 1999   | 2,951  | 1,785  | 4,152 | 54    | 32.50  | 19.65  | 45.72 | 93 |
|                               |                 |        | 2000   | 3,632  | 1,780  | 5,667 | 40    | 39.69  | 19.46  | 61.93 | 88 |
|                               |                 |        | 2001   | 2,971  | 1,784  | 4,212 | 54    | 32.08  | 19.27  | 45.49 | 96 |
|                               | 2002            |        | 3,719  | 1,776  | 5,948  | 42    | 39.76 | 18.99  | 63.58  | 88    |    |
|                               | 2003            |        | 3,676  | 1,767  | 5,766  | 42    | 38.93 | 18.71  | 61.07  | 88    |    |
|                               | 2004            | 3,594  | 1,750  | 5,456  | 43     | 37.74 | 18.37 | 57.28  | 89     |       |    |
|                               | 2005            | 3,490  | 1,728  | 5,081  | 43     | 36.47 | 18.05 | 53.09  | 93     |       |    |
|                               | 2006            | 3,375  | 1,707  | 4,680  | 44     | 35.12 | 17.76 | 48.71  | 93     |       |    |
|                               | 2007            | 3,256  | 1,685  | 4,286  | 46     | 33.77 | 17.48 | 44.45  | 93     |       |    |

| Metropolitan Statistical Area | PWID Population | Year  | Number      | Min   | Max    | Rank  | Rate   | Min   | Max    | Rank  |       |    |
|-------------------------------|-----------------|-------|-------------|-------|--------|-------|--------|-------|--------|-------|-------|----|
| Nassau--Suffolk, NY           | Young (15-29)   | 1992  | 2,017       | 1,239 | 2,901  | 55    | 36.98  | 22.73 | 53.20  | 96    |       |    |
|                               |                 | 1993  | 2,286       | 1,389 | 3,234  | 44    | 43.22  | 26.26 | 61.12  | 79    |       |    |
|                               |                 | 1994  | 2,506       | 1,539 | 3,574  | 40    | 48.82  | 29.99 | 69.62  | 80    |       |    |
|                               |                 | 1995  | 2,979       | 1,695 | 3,923  | 35    | 59.54  | 33.87 | 78.39  | 62    |       |    |
|                               |                 | 1996  | 3,356       | 1,847 | 4,369  | 29    | 68.56  | 37.73 | 89.24  | 56    |       |    |
|                               |                 | 1997  | 3,754       | 2,002 | 5,172  | 26    | 77.88  | 41.54 | 107.30 | 54    |       |    |
|                               |                 | 1998  | 4,178       | 2,156 | 6,061  | 24    | 87.42  | 45.13 | 126.83 | 49    |       |    |
|                               |                 | 1999  | 3,802       | 2,300 | 5,349  | 28    | 80.48  | 48.68 | 113.23 | 56    |       |    |
|                               |                 | 2000  | 4,937       | 2,420 | 7,703  | 22    | 105.12 | 51.53 | 164.01 | 40    |       |    |
|                               |                 | 2001  | 4,228       | 2,539 | 5,995  | 27    | 88.86  | 53.37 | 125.99 | 56    |       |    |
|                               |                 | 2002  | 5,498       | 2,626 | 8,792  | 20    | 113.86 | 54.38 | 182.08 | 40    |       |    |
|                               |                 | 2003  | 5,597       | 2,690 | 8,780  | 21    | 113.47 | 54.53 | 178.00 | 40    |       |    |
|                               |                 | 2004  | 5,590       | 2,722 | 8,485  | 20    | 110.95 | 54.02 | 168.40 | 41    |       |    |
|                               |                 | 2005  | 5,494       | 2,720 | 7,999  | 21    | 106.71 | 52.83 | 155.37 | 44    |       |    |
|                               |                 | 2006  | 5,327       | 2,694 | 7,387  | 22    | 101.59 | 51.37 | 140.88 | 46    |       |    |
|                               |                 | 2007  | 5,099       | 2,639 | 6,712  | 24    | 95.46  | 49.41 | 125.65 | 49    |       |    |
|                               |                 |       | Old (30-64) | 1992  | 7,558  | 4,645 | 10,872 | 43    | 62.01  | 38.12 | 89.21 | 92 |
|                               |                 |       |             | 1993  | 7,395  | 4,493 | 10,459 | 41    | 60.03  | 36.47 | 84.90 | 92 |
|                               |                 |       |             | 1994  | 7,051  | 4,332 | 10,055 | 47    | 56.73  | 34.85 | 80.90 | 93 |
|                               |                 |       |             | 1995  | 7,361  | 4,187 | 9,692  | 41    | 58.72  | 33.40 | 77.31 | 91 |
| 1996                          | 7,354           |       |             | 4,048 | 9,573  | 41    | 58.13  | 31.99 | 75.66  | 91    |       |    |
| 1997                          | 7,370           |       |             | 3,931 | 10,154 | 40    | 57.64  | 30.74 | 79.41  | 88    |       |    |
| 1998                          | 7,425           |       |             | 3,833 | 10,773 | 38    | 57.25  | 29.55 | 83.06  | 88    |       |    |
| 1999                          | 6,181           |       |             | 3,739 | 8,696  | 49    | 47.02  | 28.44 | 66.15  | 95    |       |    |
| 2000                          | 7,415           |       |             | 3,634 | 11,569 | 39    | 55.72  | 27.31 | 86.94  | 86    |       |    |
| 2001                          | 5,922           |       |             | 3,557 | 8,396  | 48    | 43.90  | 26.37 | 62.25  | 95    |       |    |
| 2002                          | 7,247           |       |             | 3,461 | 11,589 | 39    | 53.17  | 25.40 | 85.03  | 83    |       |    |
| 2003                          | 7,002           |       |             | 3,365 | 10,983 | 39    | 51.00  | 24.51 | 80.00  | 87    |       |    |
| 2004                          | 6,687           |       |             | 3,256 | 10,150 | 39    | 48.45  | 23.59 | 73.54  | 87    |       |    |
| 2005                          | 6,329           |       |             | 3,133 | 9,214  | 41    | 45.81  | 22.68 | 66.69  | 89    |       |    |
| 2006                          | 5,945           | 3,006 | 8,244       | 42    | 43.02  | 21.75 | 59.66  | 92    |        |       |       |    |
| 2007                          | 5,542           | 2,869 | 7,295       | 45    | 40.13  | 20.77 | 52.82  | 92    |        |       |       |    |

| Metropolitan Statistical Area | PWID Population | Year  | Number             | Min    | Max    | Rank  | Rate   | Min    | Max    | Rank  |       |    |
|-------------------------------|-----------------|-------|--------------------|--------|--------|-------|--------|--------|--------|-------|-------|----|
| New Haven--Meriden, CT        | Total           | 1992  | 16,264             | 15,333 | 17,270 | 30    | 150.34 | 141.74 | 159.64 | 34    |       |    |
|                               |                 | 1993  | 15,695             | 14,243 | 16,971 | 27    | 145.68 | 132.20 | 157.52 | 31    |       |    |
|                               |                 | 1994  | 16,106             | 14,836 | 16,773 | 30    | 149.79 | 137.98 | 156.00 | 31    |       |    |
|                               |                 | 1995  | 15,617             | 14,353 | 16,953 | 28    | 145.14 | 133.40 | 157.56 | 30    |       |    |
|                               |                 | 1996  | 15,647             | 14,422 | 17,201 | 28    | 144.67 | 133.35 | 159.05 | 30    |       |    |
|                               |                 | 1997  | 15,498             | 14,443 | 16,719 | 27    | 142.27 | 132.59 | 153.49 | 28    |       |    |
|                               |                 | 1998  | 15,363             | 14,442 | 16,121 | 27    | 140.24 | 131.84 | 147.17 | 27    |       |    |
|                               |                 | 1999  | 15,396             | 14,572 | 15,995 | 29    | 139.74 | 132.27 | 145.18 | 26    |       |    |
|                               |                 | 2000  | 14,855             | 13,499 | 16,352 | 28    | 133.82 | 121.60 | 147.31 | 27    |       |    |
|                               |                 | 2001  | 15,119             | 12,467 | 17,091 | 29    | 135.19 | 111.47 | 152.82 | 28    |       |    |
|                               |                 | 2002  | 14,302             | 11,194 | 18,080 | 27    | 126.85 | 99.28  | 160.36 | 29    |       |    |
|                               |                 | 2003  | 14,039             | 10,018 | 19,059 | 28    | 123.66 | 88.24  | 167.89 | 29    |       |    |
|                               |                 | 2004  | 13,838             | 9,289  | 19,948 | 29    | 121.30 | 81.42  | 174.85 | 28    |       |    |
|                               |                 | 2005  | 13,651             | 8,551  | 20,860 | 30    | 118.98 | 74.53  | 181.81 | 28    |       |    |
|                               |                 | 2006  | 13,447             | 7,848  | 21,713 | 32    | 116.70 | 68.11  | 188.43 | 30    |       |    |
|                               |                 | 2007  | 13,269             | 7,203  | 22,570 | 32    | 114.66 | 62.25  | 195.05 | 29    |       |    |
|                               |                 |       | Non-Hispanic White | 1992   | 7,188  | 6,777 | 7,633  | 32     | 83.50  | 78.73 | 88.67 | 46 |
|                               |                 |       |                    | 1993   | 6,973  | 6,327 | 7,539  | 28     | 82.11  | 74.51 | 88.78 | 45 |
|                               |                 |       |                    | 1994   | 7,184  | 6,617 | 7,481  | 29     | 85.42  | 78.69 | 88.96 | 44 |
|                               |                 |       |                    | 1995   | 6,986  | 6,420 | 7,583  | 27     | 83.72  | 76.95 | 90.89 | 49 |
| 1996                          | 7,012           |       |                    | 6,463  | 7,708  | 29    | 84.34  | 77.74  | 92.73  | 47    |       |    |
| 1997                          | 6,951           |       |                    | 6,478  | 7,499  | 28    | 83.77  | 78.07  | 90.37  | 46    |       |    |
| 1998                          | 6,890           |       |                    | 6,477  | 7,230  | 28    | 83.27  | 78.28  | 87.38  | 47    |       |    |
| 1999                          | 6,898           |       |                    | 6,529  | 7,166  | 29    | 83.66  | 79.19  | 86.92  | 45    |       |    |
| 2000                          | 6,644           |       |                    | 6,037  | 7,313  | 28    | 80.68  | 73.31  | 88.81  | 46    |       |    |
| 2001                          | 6,745           |       |                    | 5,561  | 7,624  | 32    | 81.95  | 67.57  | 92.64  | 48    |       |    |
| 2002                          | 6,360           |       |                    | 4,977  | 8,039  | 32    | 77.30  | 60.50  | 97.72  | 49    |       |    |
| 2003                          | 6,218           |       |                    | 4,437  | 8,442  | 33    | 75.67  | 53.99  | 102.73 | 52    |       |    |
| 2004                          | 6,103           |       |                    | 4,097  | 8,797  | 34    | 74.40  | 49.94  | 107.25 | 49    |       |    |
| 2005                          | 5,991           |       |                    | 3,753  | 9,155  | 35    | 73.22  | 45.86  | 111.88 | 53    |       |    |
| 2006                          | 5,871           |       |                    | 3,427  | 9,480  | 37    | 72.06  | 42.06  | 116.36 | 55    |       |    |
| 2007                          | 5,762           | 3,128 | 9,802              | 38     | 71.02  | 38.56 | 120.81 | 57     |        |       |       |    |

| Metropolitan Statistical Area | PWID Population    | Year  | Number   | Min   | Max    | Rank   | Rate   | Min    | Max    | Rank   |        |   |
|-------------------------------|--------------------|-------|----------|-------|--------|--------|--------|--------|--------|--------|--------|---|
| New Haven--Meriden, CT        | Non-Hispanic Black | 1992  | 4,701    | 4,432 | 4,992  | 22     | 439.44 | 414.31 | 466.63 | 25     |        |   |
|                               |                    | 1993  | 4,353    | 3,950 | 4,707  | 24     | 401.56 | 364.40 | 434.19 | 25     |        |   |
|                               |                    | 1994  | 4,234    | 3,901 | 4,410  | 25     | 387.66 | 357.10 | 403.72 | 24     |        |   |
|                               |                    | 1995  | 3,851    | 3,540 | 4,181  | 25     | 348.21 | 320.03 | 378.00 | 24     |        |   |
|                               |                    | 1996  | 3,589    | 3,308 | 3,945  | 25     | 320.02 | 294.97 | 351.82 | 24     |        |   |
|                               |                    | 1997  | 3,284    | 3,061 | 3,543  | 26     | 287.66 | 268.09 | 310.33 | 26     |        |   |
|                               |                    | 1998  | 2,996    | 2,817 | 3,144  | 27     | 257.24 | 241.82 | 269.94 | 31     |        |   |
|                               |                    | 1999  | 2,760    | 2,613 | 2,868  | 28     | 233.41 | 220.92 | 242.48 | 37     |        |   |
|                               |                    | 2000  | 2,453    | 2,229 | 2,701  | 31     | 204.65 | 185.96 | 225.28 | 39     |        |   |
|                               |                    | 2001  | 2,312    | 1,907 | 2,614  | 37     | 190.43 | 157.02 | 215.27 | 44     |        |   |
|                               |                    | 2002  | 2,044    | 1,599 | 2,583  | 35     | 165.89 | 129.83 | 209.70 | 51     |        |   |
|                               |                    | 2003  | 1,898    | 1,354 | 2,576  | 37     | 151.81 | 108.32 | 206.10 | 54     |        |   |
|                               |                    | 2004  | 1,799    | 1,207 | 2,593  | 38     | 142.44 | 95.62  | 205.33 | 56     |        |   |
|                               |                    | 2005  | 1,741    | 1,091 | 2,661  | 39     | 135.95 | 85.16  | 207.74 | 60     |        |   |
|                               |                    | 2006  | 1,725    | 1,007 | 2,786  | 43     | 133.16 | 77.71  | 215.00 | 57     |        |   |
|                               |                    | 2007  | 1,763    | 957   | 2,999  | 46     | 134.39 | 72.96  | 228.59 | 57     |        |   |
|                               |                    |       | Hispanic | 1992  | 4,658  | 4,391  | 4,946  | 17     | 525.50 | 495.44 | 558.01 | 7 |
|                               |                    |       |          | 1993  | 4,274  | 3,879  | 4,622  | 17     | 461.21 | 418.53 | 498.68 | 7 |
|                               |                    |       |          | 1994  | 4,301  | 3,962  | 4,479  | 17     | 445.61 | 410.47 | 464.07 | 7 |
|                               |                    |       |          | 1995  | 4,199  | 3,859  | 4,558  | 17     | 416.91 | 383.18 | 452.58 | 6 |
| 1996                          | 4,326              |       |          | 3,988 | 4,756  | 16     | 407.62 | 375.71 | 448.12 | 6      |        |   |
| 1997                          | 4,475              |       |          | 4,171 | 4,828  | 15     | 401.49 | 374.17 | 433.14 | 7      |        |   |
| 1998                          | 4,679              |       |          | 4,399 | 4,910  | 15     | 403.53 | 379.35 | 423.45 | 7      |        |   |
| 1999                          | 4,968              |       |          | 4,703 | 5,162  | 15     | 410.69 | 388.72 | 426.66 | 7      |        |   |
| 2000                          | 5,078              |       |          | 4,615 | 5,590  | 15     | 401.53 | 364.87 | 442.01 | 8      |        |   |
| 2001                          | 5,451              |       |          | 4,494 | 6,161  | 14     | 413.85 | 341.24 | 467.83 | 7      |        |   |
| 2002                          | 5,392              |       |          | 4,220 | 6,817  | 13     | 392.57 | 307.24 | 496.24 | 9      |        |   |
| 2003                          | 5,472              |       |          | 3,905 | 7,429  | 13     | 384.04 | 274.03 | 521.38 | 9      |        |   |
| 2004                          | 5,494              |       |          | 3,688 | 7,919  | 12     | 373.63 | 250.81 | 538.60 | 9      |        |   |
| 2005                          | 5,420              |       |          | 3,395 | 8,283  | 13     | 356.35 | 223.22 | 544.53 | 9      |        |   |
| 2006                          | 5,223              | 3,048 | 8,433    | 13    | 331.08 | 193.22 | 534.58 | 11     |        |        |        |   |
| 2007                          | 4,904              | 2,663 | 8,343    | 15    | 300.27 | 163.01 | 510.76 | 11     |        |        |        |   |

| Metropolitan Statistical Area | PWID Population | Year   | Number | Min    | Max    | Rank   | Rate   | Min    | Max    | Rank  |    |
|-------------------------------|-----------------|--------|--------|--------|--------|--------|--------|--------|--------|-------|----|
| New Haven--Meriden, CT        | Male            | 1992   | 11,754 | 11,081 | 12,481 | 26     | 221.72 | 209.04 | 235.44 | 26    |    |
|                               |                 | 1993   | 11,152 | 10,120 | 12,059 | 26     | 211.37 | 191.81 | 228.54 | 29    |    |
|                               |                 | 1994   | 11,307 | 10,416 | 11,776 | 26     | 214.84 | 197.90 | 223.74 | 25    |    |
|                               |                 | 1995   | 10,883 | 10,003 | 11,814 | 25     | 206.66 | 189.94 | 224.34 | 26    |    |
|                               |                 | 1996   | 10,868 | 10,017 | 11,947 | 25     | 205.35 | 189.28 | 225.75 | 25    |    |
|                               |                 | 1997   | 10,765 | 10,032 | 11,613 | 24     | 201.99 | 188.25 | 217.91 | 24    |    |
|                               |                 | 1998   | 10,700 | 10,059 | 11,228 | 24     | 199.76 | 187.79 | 209.63 | 20    |    |
|                               |                 | 1999   | 10,771 | 10,195 | 11,190 | 23     | 200.01 | 189.31 | 207.79 | 20    |    |
|                               |                 | 2000   | 10,449 | 9,495  | 11,502 | 23     | 192.52 | 174.94 | 211.92 | 21    |    |
|                               |                 | 2001   | 10,695 | 8,818  | 12,089 | 22     | 195.36 | 161.09 | 220.84 | 20    |    |
|                               |                 | 2002   | 10,167 | 7,957  | 12,852 | 23     | 183.95 | 143.97 | 232.53 | 22    |    |
|                               |                 | 2003   | 10,016 | 7,147  | 13,598 | 24     | 179.80 | 128.30 | 244.10 | 21    |    |
|                               |                 | 2004   | 9,889  | 6,638  | 14,255 | 24     | 176.44 | 118.44 | 254.35 | 20    |    |
|                               |                 | 2005   | 9,744  | 6,104  | 14,890 | 24     | 172.45 | 108.03 | 263.52 | 22    |    |
|                               | 2006            | 9,554  | 5,576  | 15,426 | 24     | 168.34 | 98.24  | 271.81 | 23     |       |    |
|                               | 2007            | 9,341  | 5,071  | 15,890 | 25     | 163.59 | 88.81  | 278.26 | 25     |       |    |
|                               |                 | Female | 1992   | 4,719  | 4,449  | 5,011  | 33     | 85.54  | 80.65  | 90.83 | 40 |
|                               |                 |        | 1993   | 4,686  | 4,253  | 5,067  | 31     | 85.25  | 77.36  | 92.18 | 36 |
|                               |                 |        | 1994   | 4,902  | 4,516  | 5,105  | 34     | 89.31  | 82.27  | 93.01 | 35 |
|                               |                 |        | 1995   | 4,806  | 4,417  | 5,218  | 28     | 87.49  | 80.41  | 94.97 | 35 |
|                               |                 |        | 1996   | 4,836  | 4,458  | 5,317  | 29     | 87.56  | 80.71  | 96.26 | 34 |
|                               |                 |        | 1997   | 4,784  | 4,458  | 5,161  | 29     | 85.98  | 80.13  | 92.76 | 36 |
|                               |                 |        | 1998   | 4,715  | 4,432  | 4,948  | 31     | 84.22  | 79.18  | 88.38 | 39 |
|                               |                 |        | 1999   | 4,682  | 4,432  | 4,864  | 36     | 83.14  | 78.69  | 86.37 | 43 |
|                               |                 |        | 2000   | 4,467  | 4,059  | 4,918  | 33     | 78.74  | 71.55  | 86.68 | 43 |
|                               |                 |        | 2001   | 4,491  | 3,703  | 5,077  | 38     | 78.67  | 64.86  | 88.92 | 43 |
|                               | 2002            |        | 4,197  | 3,285  | 5,306  | 36     | 73.03  | 57.16  | 92.31  | 45    |    |
|                               | 2003            |        | 4,075  | 2,908  | 5,533  | 39     | 70.49  | 50.30  | 95.70  | 47    |    |
|                               | 2004            | 3,984  | 2,674  | 5,743  | 40     | 68.64  | 46.08  | 98.95  | 49     |       |    |
|                               | 2005            | 3,913  | 2,451  | 5,979  | 40     | 67.19  | 42.09  | 102.68 | 51     |       |    |
|                               | 2006            | 3,857  | 2,251  | 6,228  | 39     | 65.96  | 38.49  | 106.50 | 49     |       |    |
|                               | 2007            | 3,834  | 2,081  | 6,521  | 39     | 65.40  | 35.51  | 111.25 | 48     |       |    |

| Metropolitan Statistical Area | PWID Population | Year   | Number | Min    | Max    | Rank   | Rate   | Min    | Max    | Rank |
|-------------------------------|-----------------|--------|--------|--------|--------|--------|--------|--------|--------|------|
| New Haven--Meriden, CT        | Young (15-29)   | 1992   | 4,164  | 3,925  | 4,421  | 31     | 122.79 | 115.77 | 130.39 | 28   |
|                               |                 | 1993   | 3,815  | 3,462  | 4,125  | 28     | 116.17 | 105.42 | 125.61 | 28   |
|                               |                 | 1994   | 3,802  | 3,502  | 3,960  | 28     | 119.14 | 109.75 | 124.08 | 28   |
|                               |                 | 1995   | 3,655  | 3,359  | 3,968  | 27     | 117.15 | 107.67 | 127.18 | 28   |
|                               |                 | 1996   | 3,697  | 3,407  | 4,064  | 27     | 120.32 | 110.90 | 132.27 | 27   |
|                               |                 | 1997   | 3,753  | 3,498  | 4,049  | 27     | 123.08 | 114.71 | 132.79 | 27   |
|                               |                 | 1998   | 3,862  | 3,630  | 4,052  | 27     | 127.24 | 119.61 | 133.52 | 28   |
|                               |                 | 1999   | 4,055  | 3,838  | 4,213  | 26     | 134.49 | 127.29 | 139.72 | 25   |
|                               |                 | 2000   | 4,126  | 3,749  | 4,541  | 26     | 137.00 | 124.49 | 150.81 | 23   |
|                               |                 | 2001   | 4,443  | 3,664  | 5,023  | 26     | 147.47 | 121.60 | 166.71 | 23   |
|                               |                 | 2002   | 4,451  | 3,484  | 5,627  | 27     | 146.20 | 114.42 | 184.81 | 21   |
|                               |                 | 2003   | 4,619  | 3,296  | 6,270  | 26     | 150.14 | 107.13 | 203.83 | 21   |
|                               |                 | 2004   | 4,792  | 3,217  | 6,908  | 25     | 153.55 | 103.08 | 221.35 | 21   |
|                               |                 | 2005   | 4,945  | 3,097  | 7,556  | 24     | 155.30 | 97.28  | 237.31 | 20   |
|                               |                 | 2006   | 5,053  | 2,949  | 8,159  | 25     | 156.99 | 91.62  | 253.49 | 21   |
|                               | 2007            | 5,121  | 2,780  | 8,711  | 23     | 157.03 | 85.25  | 267.11 | 21     |      |
|                               | Old (30-64)     | 1992   | 12,263 | 11,561 | 13,021 | 29     | 165.12 | 155.67 | 175.33 | 35   |
|                               |                 | 1993   | 11,911 | 10,808 | 12,878 | 27     | 159.03 | 144.31 | 171.95 | 32   |
|                               |                 | 1994   | 12,262 | 11,296 | 12,770 | 26     | 162.18 | 149.39 | 168.90 | 35   |
|                               |                 | 1995   | 11,894 | 10,932 | 12,912 | 27     | 155.68 | 143.09 | 169.00 | 28   |
|                               |                 | 1996   | 11,886 | 10,956 | 13,067 | 26     | 153.51 | 141.49 | 168.76 | 28   |
| 1997                          |                 | 11,705 | 10,909 | 12,628 | 26     | 149.24 | 139.08 | 161.00 | 29     |      |
| 1998                          |                 | 11,497 | 10,808 | 12,065 | 26     | 145.18 | 136.48 | 152.35 | 28     |      |
| 1999                          |                 | 11,374 | 10,766 | 11,817 | 27     | 142.14 | 134.54 | 147.67 | 32     |      |
| 2000                          |                 | 10,790 | 9,805  | 11,878 | 27     | 133.38 | 121.20 | 146.83 | 32     |      |
| 2001                          |                 | 10,749 | 8,864  | 12,151 | 28     | 131.56 | 108.48 | 148.72 | 31     |      |
| 2002                          |                 | 9,905  | 7,752  | 12,521 | 28     | 120.36 | 94.20  | 152.14 | 33     |      |
| 2003                          |                 | 9,420  | 6,722  | 12,789 | 28     | 113.83 | 81.22  | 154.53 | 32     |      |
| 2004                          |                 | 8,943  | 6,003  | 12,892 | 28     | 107.91 | 72.44  | 155.55 | 34     |      |
| 2005                          |                 | 8,439  | 5,286  | 12,896 | 31     | 101.80 | 63.77  | 155.56 | 37     |      |
| 2006                          |                 | 7,888  | 4,604  | 12,737 | 32     | 94.99  | 55.44  | 153.37 | 39     |      |
| 2007                          | 7,319           | 3,973  | 12,449 | 32     | 88.07  | 47.81  | 149.80 | 41     |        |      |



| Metropolitan Statistical Area | PWID Population | Year  | Number             | Min    | Max    | Rank  | Rate   | Min    | Max    | Rank   |        |    |
|-------------------------------|-----------------|-------|--------------------|--------|--------|-------|--------|--------|--------|--------|--------|----|
| New Orleans, LA               | Total           | 1992  | 16,835             | 12,753 | 19,701 | 29    | 196.51 | 148.86 | 229.97 | 17     |        |    |
|                               |                 | 1993  | 13,427             | 3,754  | 20,288 | 32    | 155.78 | 43.55  | 235.38 | 27     |        |    |
|                               |                 | 1994  | 16,481             | 11,913 | 20,890 | 28    | 189.93 | 137.30 | 240.75 | 16     |        |    |
|                               |                 | 1995  | 13,244             | 3,962  | 21,524 | 30    | 151.43 | 45.31  | 246.11 | 27     |        |    |
|                               |                 | 1996  | 13,125             | 4,050  | 22,076 | 31    | 149.51 | 46.14  | 251.48 | 26     |        |    |
|                               |                 | 1997  | 13,028             | 4,137  | 22,657 | 32    | 147.69 | 46.90  | 256.85 | 26     |        |    |
|                               |                 | 1998  | 12,934             | 4,222  | 23,193 | 32    | 145.97 | 47.65  | 261.75 | 25     |        |    |
|                               |                 | 1999  | 15,692             | 9,959  | 23,730 | 28    | 176.33 | 111.91 | 266.65 | 11     |        |    |
|                               |                 | 2000  | 12,730             | 4,497  | 23,954 | 31    | 142.92 | 50.49  | 268.93 | 21     |        |    |
|                               |                 | 2001  | 15,249             | 9,440  | 24,150 | 28    | 171.25 | 106.02 | 271.21 | 14     |        |    |
|                               |                 | 2002  | 12,395             | 4,471  | 24,417 | 33    | 138.82 | 50.07  | 273.45 | 22     |        |    |
|                               |                 | 2003  | 12,231             | 4,461  | 24,666 | 34    | 136.72 | 49.87  | 275.70 | 24     |        |    |
|                               |                 | 2004  | 12,105             | 4,450  | 24,956 | 36    | 134.71 | 49.53  | 277.73 | 23     |        |    |
|                               |                 | 2005  | 11,943             | 4,413  | 25,169 | 36    | 132.75 | 49.05  | 279.76 | 22     |        |    |
|                               |                 | 2006  | 9,096              | 3,378  | 19,573 | 47    | 130.79 | 48.56  | 281.42 | 22     |        |    |
|                               |                 | 2007  | 9,970              | 3,708  | 21,915 | 42    | 128.79 | 47.89  | 283.09 | 23     |        |    |
|                               |                 |       | Non-Hispanic White | 1992   | 7,724  | 5,851 | 9,039  | 28     | 150.91 | 114.32 | 176.61 | 19 |
|                               |                 |       |                    | 1993   | 6,281  | 1,756 | 9,490  | 34     | 123.09 | 34.42  | 186.00 | 27 |
|                               |                 |       |                    | 1994   | 7,784  | 5,627 | 9,867  | 27     | 152.83 | 110.48 | 193.72 | 16 |
|                               |                 |       |                    | 1995   | 6,270  | 1,876 | 10,190 | 31     | 123.23 | 36.87  | 200.28 | 24 |
| 1996                          | 6,194           |       |                    | 1,911  | 10,418 | 31    | 122.34 | 37.75  | 205.77 | 21     |        |    |
| 1997                          | 6,108           |       |                    | 1,940  | 10,623 | 33    | 120.92 | 38.40  | 210.29 | 20     |        |    |
| 1998                          | 6,015           |       |                    | 1,964  | 10,786 | 34    | 119.35 | 38.96  | 214.01 | 21     |        |    |
| 1999                          | 7,240           |       |                    | 4,595  | 10,949 | 27    | 144.20 | 91.52  | 218.06 | 11     |        |    |
| 2000                          | 5,840           |       |                    | 2,063  | 10,989 | 35    | 117.16 | 41.38  | 220.45 | 20     |        |    |
| 2001                          | 6,983           |       |                    | 4,323  | 11,060 | 29    | 140.96 | 87.27  | 223.24 | 14     |        |    |
| 2002                          | 5,700           |       |                    | 2,056  | 11,229 | 37    | 115.40 | 41.63  | 227.32 | 19     |        |    |
| 2003                          | 5,692           |       |                    | 2,076  | 11,478 | 37    | 115.61 | 42.17  | 233.13 | 21     |        |    |
| 2004                          | 5,751           |       |                    | 2,114  | 11,856 | 37    | 116.94 | 42.99  | 241.08 | 21     |        |    |
| 2005                          | 5,849           |       |                    | 2,161  | 12,327 | 37    | 119.53 | 44.16  | 251.91 | 21     |        |    |
| 2006                          | 4,639           | 1,723 | 9,983              | 47     | 111.05 | 41.23 | 238.94 | 25     |        |        |        |    |
| 2007                          | 5,347           | 1,988 | 11,752             | 42     | 119.54 | 44.45 | 262.75 | 21     |        |        |        |    |

| Metropolitan Statistical Area | PWID Population    | Year | Number   | Min   | Max    | Rank  | Rate   | Min    | Max    | Rank  |       |    |
|-------------------------------|--------------------|------|----------|-------|--------|-------|--------|--------|--------|-------|-------|----|
| New Orleans, LA               | Non-Hispanic Black | 1992 | 8,578    | 6,498 | 10,039 | 13    | 297.59 | 225.43 | 348.26 | 49    |       |    |
|                               |                    | 1993 | 6,537    | 1,828 | 9,878  | 13    | 222.35 | 62.17  | 335.97 | 57    |       |    |
|                               |                    | 1994 | 7,752    | 5,604 | 9,826  | 13    | 259.02 | 187.24 | 328.32 | 55    |       |    |
|                               |                    | 1995 | 6,080    | 1,819 | 9,882  | 16    | 199.42 | 59.67  | 324.11 | 61    |       |    |
|                               |                    | 1996 | 5,934    | 1,831 | 9,981  | 16    | 191.76 | 59.18  | 322.53 | 60    |       |    |
|                               |                    | 1997 | 5,842    | 1,855 | 10,160 | 16    | 186.15 | 59.11  | 323.74 | 57    |       |    |
|                               |                    | 1998 | 5,784    | 1,888 | 10,372 | 15    | 181.83 | 59.36  | 326.04 | 55    |       |    |
|                               |                    | 1999 | 7,022    | 4,457 | 10,619 | 13    | 217.63 | 138.12 | 329.09 | 43    |       |    |
|                               |                    | 2000 | 5,709    | 2,017 | 10,743 | 15    | 175.23 | 61.90  | 329.72 | 51    |       |    |
|                               |                    | 2001 | 6,850    | 4,241 | 10,849 | 13    | 209.33 | 129.59 | 331.52 | 36    |       |    |
|                               |                    | 2002 | 5,564    | 2,007 | 10,960 | 16    | 168.84 | 60.90  | 332.59 | 48    |       |    |
|                               |                    | 2003 | 5,463    | 1,992 | 11,016 | 16    | 164.86 | 60.13  | 332.45 | 47    |       |    |
|                               |                    | 2004 | 5,345    | 1,965 | 11,020 | 16    | 159.92 | 58.80  | 329.70 | 45    |       |    |
|                               |                    | 2005 | 5,172    | 1,911 | 10,900 | 16    | 153.80 | 56.82  | 324.12 | 48    |       |    |
|                               |                    | 2006 | 3,825    | 1,420 | 8,231  | 19    | 178.25 | 66.19  | 383.54 | 43    |       |    |
|                               |                    | 2007 | 4,024    | 1,497 | 8,846  | 19    | 157.05 | 58.40  | 345.20 | 49    |       |    |
|                               |                    |      | Hispanic | 1992  | 287    | 218   | 336    | 63     | 75.69  | 57.33 | 88.57 | 67 |
|                               |                    |      |          | 1993  | 212    | 59    | 321    | 64     | 56.10  | 15.69 | 84.77 | 77 |
|                               |                    |      |          | 1994  | 246    | 178   | 312    | 64     | 64.23  | 46.43 | 81.41 | 75 |
|                               |                    |      |          | 1995  | 189    | 57    | 307    | 67     | 48.41  | 14.49 | 78.68 | 77 |
| 1996                          | 182                |      |          | 56    | 306    | 68    | 46.41  | 14.32  | 78.06  | 78    |       |    |
| 1997                          | 177                |      |          | 56    | 309    | 68    | 44.87  | 14.25  | 78.03  | 77    |       |    |
| 1998                          | 175                |      |          | 57    | 314    | 67    | 43.92  | 14.34  | 78.75  | 75    |       |    |
| 1999                          | 214                |      |          | 136   | 323    | 66    | 53.30  | 33.83  | 80.60  | 68    |       |    |
| 2000                          | 176                |      |          | 62    | 332    | 69    | 43.47  | 15.36  | 81.80  | 72    |       |    |
| 2001                          | 216                |      |          | 134   | 343    | 68    | 51.88  | 32.12  | 82.16  | 65    |       |    |
| 2002                          | 182                |      |          | 66    | 358    | 71    | 42.39  | 15.29  | 83.50  | 68    |       |    |
| 2003                          | 187                |      |          | 68    | 377    | 72    | 42.52  | 15.51  | 85.74  | 67    |       |    |
| 2004                          | 195                |      |          | 72    | 401    | 72    | 43.15  | 15.86  | 88.96  | 68    |       |    |
| 2005                          | 203                |      |          | 75    | 429    | 72    | 43.98  | 16.25  | 92.68  | 67    |       |    |
| 2006                          | 165                | 61   | 356      | 75    | 41.23  | 15.31 | 88.71  | 69     |        |       |       |    |
| 2007                          | 195                | 73   | 430      | 74    | 43.27  | 16.09 | 95.12  | 67     |        |       |       |    |

| Metropolitan Statistical Area | PWID Population | Year   | Number | Min    | Max    | Rank   | Rate   | Min    | Max    | Rank   |    |
|-------------------------------|-----------------|--------|--------|--------|--------|--------|--------|--------|--------|--------|----|
| New Orleans, LA               | Male            | 1992   | 12,462 | 9,440  | 14,584 | 24     | 302.37 | 229.06 | 353.86 | 13     |    |
|                               |                 | 1993   | 9,852  | 2,755  | 14,887 | 28     | 238.04 | 66.55  | 359.69 | 19     |    |
|                               |                 | 1994   | 11,988 | 8,666  | 15,195 | 23     | 287.39 | 207.75 | 364.27 | 9      |    |
|                               |                 | 1995   | 9,550  | 2,857  | 15,520 | 29     | 227.13 | 67.96  | 369.14 | 17     |    |
|                               |                 | 1996   | 9,383  | 2,896  | 15,782 | 29     | 222.41 | 68.63  | 374.08 | 17     |    |
|                               |                 | 1997   | 9,236  | 2,933  | 16,063 | 29     | 217.82 | 69.17  | 378.82 | 15     |    |
|                               |                 | 1998   | 9,097  | 2,970  | 16,311 | 29     | 213.47 | 69.69  | 382.78 | 15     |    |
|                               |                 | 1999   | 10,953 | 6,952  | 16,564 | 21     | 255.82 | 162.36 | 386.85 | 9      |    |
|                               |                 | 2000   | 8,824  | 3,117  | 16,604 | 31     | 205.75 | 72.68  | 387.15 | 17     |    |
|                               |                 | 2001   | 10,503 | 6,502  | 16,633 | 24     | 244.80 | 151.55 | 387.70 | 9      |    |
|                               |                 | 2002   | 8,490  | 3,062  | 16,724 | 33     | 197.25 | 71.15  | 388.55 | 19     |    |
|                               |                 | 2003   | 8,339  | 3,042  | 16,816 | 33     | 193.54 | 70.60  | 390.30 | 19     |    |
|                               |                 | 2004   | 8,222  | 3,023  | 16,951 | 33     | 189.71 | 69.75  | 391.11 | 18     |    |
|                               |                 | 2005   | 8,091  | 2,989  | 17,051 | 34     | 186.46 | 68.89  | 392.96 | 18     |    |
|                               | 2006            | 6,154  | 2,285  | 13,241 | 40     | 183.01 | 67.96  | 393.80 | 18     |        |    |
|                               | 2007            | 6,744  | 2,508  | 14,824 | 38     | 180.45 | 67.10  | 396.64 | 19     |        |    |
|                               |                 | Female | 1992   | 4,597  | 3,482  | 5,379  | 34     | 103.40 | 78.33  | 121.01 | 33 |
|                               |                 |        | 1993   | 3,783  | 1,058  | 5,716  | 37     | 84.44  | 23.61  | 127.59 | 39 |
|                               |                 |        | 1994   | 4,776  | 3,453  | 6,054  | 35     | 106.00 | 76.63  | 134.37 | 27 |
|                               |                 |        | 1995   | 3,937  | 1,178  | 6,398  | 36     | 86.68  | 25.93  | 140.87 | 36 |
|                               |                 |        | 1996   | 3,990  | 1,231  | 6,711  | 34     | 87.51  | 27.01  | 147.19 | 35 |
|                               |                 |        | 1997   | 4,041  | 1,283  | 7,028  | 36     | 88.21  | 28.01  | 153.42 | 33 |
|                               |                 |        | 1998   | 4,084  | 1,333  | 7,323  | 36     | 88.80  | 28.99  | 159.22 | 33 |
|                               |                 |        | 1999   | 5,033  | 3,195  | 7,611  | 32     | 109.01 | 69.18  | 164.84 | 19 |
|                               |                 |        | 2000   | 4,140  | 1,462  | 7,790  | 38     | 89.64  | 31.66  | 168.67 | 29 |
|                               |                 |        | 2001   | 5,019  | 3,107  | 7,949  | 32     | 108.78 | 67.34  | 172.28 | 18 |
|                               | 2002            |        | 4,123  | 1,487  | 8,122  | 37     | 89.16  | 32.16  | 175.62 | 29     |    |
|                               | 2003            |        | 4,106  | 1,498  | 8,281  | 38     | 88.53  | 32.29  | 178.53 | 27     |    |
|                               | 2004            | 4,096  | 1,506  | 8,445  | 37     | 88.06  | 32.38  | 181.55 | 27     |        |    |
|                               | 2005            | 4,070  | 1,504  | 8,577  | 37     | 87.38  | 32.29  | 184.15 | 25     |        |    |
|                               | 2006            | 3,119  | 1,158  | 6,712  | 47     | 86.83  | 32.24  | 186.83 | 25     |        |    |
|                               | 2007            | 3,438  | 1,279  | 7,558  | 43     | 85.87  | 31.93  | 188.76 | 27     |        |    |

| Metropolitan Statistical Area | PWID Population | Year  | Number      | Min   | Max    | Rank  | Rate   | Min    | Max    | Rank   |        |    |
|-------------------------------|-----------------|-------|-------------|-------|--------|-------|--------|--------|--------|--------|--------|----|
| New Orleans, LA               | Young (15-29)   | 1992  | 4,332       | 3,281 | 5,069  | 25    | 147.95 | 112.08 | 173.14 | 17     |        |    |
|                               |                 | 1993  | 3,473       | 971   | 5,247  | 31    | 119.79 | 33.49  | 181.00 | 27     |        |    |
|                               |                 | 1994  | 4,413       | 3,190 | 5,594  | 24    | 152.95 | 110.57 | 193.87 | 15     |        |    |
|                               |                 | 1995  | 3,757       | 1,124 | 6,106  | 26    | 130.15 | 38.94  | 211.52 | 24     |        |    |
|                               |                 | 1996  | 4,007       | 1,236 | 6,739  | 24    | 139.16 | 42.94  | 234.06 | 17     |        |    |
|                               |                 | 1997  | 4,319       | 1,371 | 7,511  | 23    | 150.11 | 47.67  | 261.07 | 14     |        |    |
|                               |                 | 1998  | 4,667       | 1,524 | 8,369  | 21    | 162.41 | 53.02  | 291.23 | 11     |        |    |
|                               |                 | 1999  | 6,144       | 3,899 | 9,291  | 15    | 214.73 | 136.28 | 324.72 | 5      |        |    |
|                               |                 | 2000  | 5,365       | 1,895 | 10,095 | 18    | 189.31 | 66.87  | 356.22 | 7      |        |    |
|                               |                 | 2001  | 6,834       | 4,231 | 10,824 | 14    | 243.37 | 150.67 | 385.43 | 5      |        |    |
|                               |                 | 2002  | 5,820       | 2,099 | 11,464 | 18    | 207.74 | 74.93  | 409.20 | 7      |        |    |
|                               |                 | 2003  | 5,910       | 2,155 | 11,917 | 17    | 211.23 | 77.05  | 425.96 | 7      |        |    |
|                               |                 | 2004  | 5,895       | 2,167 | 12,153 | 18    | 209.11 | 76.88  | 431.11 | 11     |        |    |
|                               |                 | 2005  | 5,720       | 2,113 | 12,055 | 18    | 202.59 | 74.85  | 426.94 | 12     |        |    |
|                               |                 | 2006  | 4,159       | 1,544 | 8,950  | 32    | 200.51 | 74.45  | 431.44 | 13     |        |    |
|                               |                 | 2007  | 4,193       | 1,559 | 9,215  | 31    | 177.52 | 66.02  | 390.20 | 16     |        |    |
|                               |                 |       | Old (30-64) | 1992  | 12,661 | 9,591 | 14,816 | 28     | 224.52 | 170.08 | 262.75 | 17 |
|                               |                 |       |             | 1993  | 10,104 | 2,825 | 15,267 | 31     | 176.64 | 49.39  | 266.90 | 25 |
|                               |                 |       |             | 1994  | 12,276 | 8,874 | 15,561 | 25     | 211.96 | 153.22 | 268.67 | 17 |
|                               |                 |       |             | 1995  | 9,673  | 2,894 | 15,721 | 32     | 165.09 | 49.39  | 268.31 | 25 |
| 1996                          | 9,318           |       |             | 2,876 | 15,673 | 33    | 157.96 | 48.75  | 265.69 | 27     |        |    |
| 1997                          | 8,920           |       |             | 2,832 | 15,513 | 33    | 150.06 | 47.65  | 260.97 | 28     |        |    |
| 1998                          | 8,483           |       |             | 2,769 | 15,211 | 34    | 141.69 | 46.26  | 254.08 | 29     |        |    |
| 1999                          | 9,813           |       |             | 6,228 | 14,840 | 32    | 162.53 | 103.15 | 245.78 | 21     |        |    |
| 2000                          | 7,580           |       |             | 2,678 | 14,264 | 38    | 124.81 | 44.09  | 234.85 | 36     |        |    |
| 2001                          | 8,672           |       |             | 5,368 | 13,733 | 35    | 142.24 | 88.06  | 225.27 | 27     |        |    |
| 2002                          | 6,788           |       |             | 2,448 | 13,370 | 40    | 110.77 | 39.96  | 218.20 | 37     |        |    |
| 2003                          | 6,539           |       |             | 2,385 | 13,187 | 40    | 106.35 | 38.79  | 214.47 | 38     |        |    |
| 2004                          | 6,441           |       |             | 2,368 | 13,279 | 40    | 104.45 | 38.40  | 215.33 | 38     |        |    |
| 2005                          | 6,475           |       |             | 2,392 | 13,646 | 39    | 104.89 | 38.75  | 221.04 | 32     |        |    |
| 2006                          | 5,155           | 1,914 | 11,093      | 49    | 105.63 | 39.22 | 227.29 | 29     |        |        |        |    |
| 2007                          | 6,052           | 2,251 | 13,302      | 41    | 112.49 | 41.83 | 247.26 | 23     |        |        |        |    |

| Metropolitan Statistical Area | PWID Population | Year   | Number             | Min    | Max     | Rank   | Rate   | Min   | Max    | Rank  |        |    |
|-------------------------------|-----------------|--------|--------------------|--------|---------|--------|--------|-------|--------|-------|--------|----|
| New York, NY                  | Total           | 1992   | 109,820            | 36,685 | 172,972 | 1      | 188.53 | 62.98 | 296.94 | 19    |        |    |
|                               |                 | 1993   | 110,884            | 38,021 | 164,818 | 1      | 188.75 | 64.72 | 280.56 | 15    |        |    |
|                               |                 | 1994   | 103,815            | 39,346 | 156,287 | 1      | 175.54 | 66.53 | 264.27 | 18    |        |    |
|                               |                 | 1995   | 105,295            | 40,697 | 148,140 | 1      | 176.82 | 68.34 | 248.76 | 16    |        |    |
|                               |                 | 1996   | 103,014            | 42,301 | 140,829 | 1      | 171.29 | 70.34 | 234.17 | 15    |        |    |
|                               |                 | 1997   | 101,005            | 44,031 | 134,176 | 1      | 165.94 | 72.34 | 220.43 | 15    |        |    |
|                               |                 | 1998   | 99,315             | 45,590 | 128,174 | 1      | 160.78 | 73.80 | 207.50 | 14    |        |    |
|                               |                 | 1999   | 92,143             | 47,002 | 121,967 | 1      | 147.57 | 75.27 | 195.33 | 23    |        |    |
|                               |                 | 2000   | 97,808             | 47,522 | 120,992 | 1      | 155.32 | 75.46 | 192.13 | 15    |        |    |
|                               |                 | 2001   | 88,076             | 48,026 | 109,871 | 1      | 138.75 | 75.66 | 173.08 | 23    |        |    |
|                               |                 | 2002   | 102,284            | 48,789 | 149,110 | 1      | 160.38 | 76.50 | 233.80 | 10    |        |    |
|                               |                 | 2003   | 105,580            | 49,575 | 166,077 | 1      | 164.72 | 77.34 | 259.11 | 10    |        |    |
|                               |                 | 2004   | 107,678            | 50,444 | 177,590 | 1      | 166.88 | 78.18 | 275.23 | 10    |        |    |
|                               |                 | 2005   | 106,849            | 51,363 | 176,902 | 1      | 164.36 | 79.01 | 272.11 | 10    |        |    |
|                               |                 | 2006   | 105,490            | 52,095 | 174,080 | 1      | 161.30 | 79.66 | 266.19 | 10    |        |    |
|                               |                 | 2007   | 103,877            | 52,917 | 169,859 | 1      | 157.64 | 80.31 | 257.78 | 13    |        |    |
|                               |                 |        | Non-Hispanic White | 1992   | 29,738  | 9,934  | 46,838 | 2     | 112.39 | 37.54 | 177.02 | 32 |
|                               |                 |        |                    | 1993   | 30,158  | 10,341 | 44,827 | 2     | 115.14 | 39.48 | 171.14 | 31 |
|                               |                 |        |                    | 1994   | 28,263  | 10,712 | 42,548 | 2     | 109.06 | 41.33 | 164.18 | 31 |
|                               |                 |        |                    | 1995   | 28,589  | 11,050 | 40,221 | 3     | 111.38 | 43.05 | 156.71 | 29 |
| 1996                          | 27,788          |        |                    | 11,411 | 37,989  | 3      | 108.89 | 44.71 | 148.86 | 27    |        |    |
| 1997                          | 26,963          |        |                    | 11,754 | 35,818  | 3      | 106.03 | 46.22 | 140.85 | 29    |        |    |
| 1998                          | 26,129          |        |                    | 11,994 | 33,722  | 3      | 102.69 | 47.14 | 132.53 | 33    |        |    |
| 1999                          | 23,793          |        |                    | 12,137 | 31,494  | 4      | 93.74  | 47.82 | 124.08 | 34    |        |    |
| 2000                          | 24,681          |        |                    | 11,992 | 30,532  | 4      | 97.89  | 47.56 | 121.09 | 33    |        |    |
| 2001                          | 21,626          |        |                    | 11,792 | 26,977  | 4      | 85.30  | 46.51 | 106.41 | 41    |        |    |
| 2002                          | 24,330          |        |                    | 11,605 | 35,468  | 3      | 96.11  | 45.85 | 140.12 | 34    |        |    |
| 2003                          | 24,222          |        |                    | 11,373 | 38,102  | 3      | 95.66  | 44.92 | 150.48 | 37    |        |    |
| 2004                          | 23,723          |        |                    | 11,113 | 39,126  | 3      | 93.34  | 43.73 | 153.95 | 36    |        |    |
| 2005                          | 22,511          |        |                    | 10,821 | 37,269  | 4      | 88.14  | 42.37 | 145.92 | 41    |        |    |
| 2006                          | 21,167          | 10,453 | 34,929             | 5      | 82.63   | 40.81  | 136.36 | 45    |        |       |        |    |
| 2007                          | 19,777          | 10,075 | 32,339             | 5      | 76.82   | 39.13  | 125.61 | 51    |        |       |        |    |

| Metropolitan Statistical Area | PWID Population    | Year     | Number | Min    | Max    | Rank   | Rate   | Min    | Max    | Rank   |    |
|-------------------------------|--------------------|----------|--------|--------|--------|--------|--------|--------|--------|--------|----|
| New York, NY                  | Non-Hispanic Black | 1992     | 41,908 | 13,999 | 66,007 | 1      | 307.80 | 102.82 | 484.80 | 47     |    |
|                               |                    | 1993     | 41,263 | 14,149 | 61,333 | 1      | 300.13 | 102.91 | 446.11 | 44     |    |
|                               |                    | 1994     | 37,445 | 14,192 | 56,371 | 1      | 269.90 | 102.29 | 406.33 | 49     |    |
|                               |                    | 1995     | 36,631 | 14,158 | 51,536 | 1      | 261.91 | 101.23 | 368.48 | 45     |    |
|                               |                    | 1996     | 34,441 | 14,143 | 47,084 | 1      | 244.14 | 100.25 | 333.77 | 47     |    |
|                               |                    | 1997     | 32,384 | 14,117 | 43,019 | 1      | 226.59 | 98.78  | 301.00 | 47     |    |
|                               |                    | 1998     | 30,521 | 14,011 | 39,390 | 1      | 210.26 | 96.52  | 271.36 | 47     |    |
|                               |                    | 1999     | 27,180 | 13,864 | 35,978 | 2      | 185.32 | 94.53  | 245.30 | 53     |    |
|                               |                    | 2000     | 27,787 | 13,501 | 34,374 | 2      | 188.17 | 91.43  | 232.77 | 45     |    |
|                               |                    | 2001     | 24,234 | 13,214 | 30,231 | 2      | 164.17 | 89.52  | 204.79 | 59     |    |
|                               |                    | 2002     | 27,469 | 13,103 | 40,045 | 2      | 186.04 | 88.74  | 271.22 | 40     |    |
|                               |                    | 2003     | 27,954 | 13,126 | 43,972 | 2      | 189.08 | 88.78  | 297.42 | 36     |    |
|                               |                    | 2004     | 28,454 | 13,330 | 46,928 | 2      | 191.82 | 89.86  | 316.37 | 35     |    |
|                               |                    | 2005     | 28,588 | 13,742 | 47,331 | 2      | 192.22 | 92.40  | 318.24 | 35     |    |
|                               | 2006               | 29,046   | 14,344 | 47,931 | 2      | 195.09 | 96.34  | 321.94 | 35     |        |    |
|                               | 2007               | 29,954   | 15,259 | 48,981 | 2      | 201.35 | 102.57 | 329.25 | 34     |        |    |
|                               |                    | Hispanic | 1992   | 39,432 | 13,172 | 62,107 | 1      | 294.31 | 98.31  | 463.56 | 17 |
|                               |                    |          | 1993   | 39,010 | 13,376 | 57,985 | 1      | 283.72 | 97.28  | 421.72 | 18 |
|                               |                    |          | 1994   | 36,110 | 13,685 | 54,361 | 1      | 256.95 | 97.38  | 386.83 | 19 |
|                               |                    |          | 1995   | 36,517 | 14,114 | 51,376 | 1      | 254.47 | 98.36  | 358.02 | 16 |
|                               |                    |          | 1996   | 35,901 | 14,742 | 49,080 | 1      | 244.80 | 100.52 | 334.66 | 17 |
| 1997                          |                    |          | 35,623 | 15,529 | 47,322 | 1      | 237.27 | 103.44 | 315.20 | 16     |    |
| 1998                          |                    |          | 35,669 | 16,373 | 46,034 | 1      | 232.06 | 106.52 | 299.49 | 15     |    |
| 1999                          |                    |          | 33,884 | 17,284 | 44,851 | 1      | 216.35 | 110.36 | 286.38 | 17     |    |
| 2000                          |                    |          | 36,999 | 17,977 | 45,769 | 1      | 231.33 | 112.40 | 286.16 | 15     |    |
| 2001                          |                    |          | 34,408 | 18,762 | 42,923 | 1      | 212.42 | 115.83 | 264.99 | 16     |    |
| 2002                          |                    |          | 41,401 | 19,748 | 60,356 | 1      | 252.66 | 120.52 | 368.33 | 13     |    |
| 2003                          |                    |          | 44,394 | 20,845 | 69,832 | 1      | 268.23 | 125.95 | 421.93 | 12     |    |
| 2004                          |                    |          | 47,128 | 22,078 | 77,726 | 1      | 282.03 | 132.12 | 465.14 | 12     |    |
| 2005                          |                    |          | 48,745 | 23,432 | 80,704 | 1      | 288.76 | 138.81 | 478.07 | 12     |    |
| 2006                          | 50,203             | 24,792   | 82,845 | 1      | 294.75 | 145.56 | 486.40 | 12     |        |        |    |
| 2007                          | 51,578             | 26,275   | 84,339 | 1      | 299.10 | 152.37 | 489.08 | 12     |        |        |    |

| Metropolitan Statistical Area | PWID Population | Year   | Number | Min     | Max     | Rank   | Rate   | Min    | Max    | Rank   |    |
|-------------------------------|-----------------|--------|--------|---------|---------|--------|--------|--------|--------|--------|----|
| New York, NY                  | Male            | 1992   | 72,420 | 24,192  | 114,064 | 1      | 259.92 | 86.83  | 409.39 | 17     |    |
|                               |                 | 1993   | 74,194 | 25,440  | 110,283 | 1      | 263.85 | 90.47  | 392.18 | 12     |    |
|                               |                 | 1994   | 70,313 | 26,649  | 105,852 | 1      | 248.35 | 94.12  | 373.87 | 18     |    |
|                               |                 | 1995   | 72,055 | 27,849  | 101,374 | 1      | 252.72 | 97.68  | 355.55 | 12     |    |
|                               |                 | 1996   | 71,135 | 29,211  | 97,248  | 1      | 247.08 | 101.46 | 337.78 | 11     |    |
|                               |                 | 1997   | 70,329 | 30,659  | 93,427  | 1      | 241.28 | 105.18 | 320.51 | 9      |    |
|                               |                 | 1998   | 69,710 | 32,000  | 89,966  | 1      | 235.63 | 108.17 | 304.10 | 9      |    |
|                               |                 | 1999   | 65,206 | 33,261  | 86,311  | 1      | 217.89 | 111.14 | 288.41 | 16     |    |
|                               |                 | 2000   | 69,822 | 33,925  | 86,372  | 1      | 231.18 | 112.33 | 285.98 | 9      |    |
|                               |                 | 2001   | 63,483 | 34,616  | 79,193  | 1      | 208.25 | 113.56 | 259.79 | 16     |    |
|                               |                 | 2002   | 74,530 | 35,551  | 108,651 | 1      | 243.13 | 115.97 | 354.44 | 7      |    |
|                               |                 | 2003   | 77,890 | 36,573  | 122,521 | 1      | 252.47 | 118.55 | 397.13 | 7      |    |
|                               |                 | 2004   | 80,563 | 37,741  | 132,870 | 1      | 259.13 | 121.39 | 427.38 | 8      |    |
|                               |                 | 2005   | 81,220 | 39,043  | 134,470 | 1      | 258.85 | 124.43 | 428.56 | 8      |    |
|                               | 2006            | 81,616 | 40,305 | 134,683 | 1       | 258.26 | 127.54 | 426.18 | 8      |        |    |
|                               | 2007            | 81,938 | 41,741 | 133,985 | 1       | 256.89 | 130.87 | 420.07 | 8      |        |    |
|                               |                 | Female | 1992   | 31,517  | 10,528  | 49,641 | 2      | 103.71 | 34.64  | 163.35 | 32 |
|                               |                 |        | 1993   | 32,417  | 11,115  | 48,185 | 2      | 105.85 | 36.29  | 157.33 | 26 |
|                               |                 |        | 1994   | 30,828  | 11,684  | 46,409 | 1      | 100.00 | 37.90  | 150.54 | 32 |
|                               |                 |        | 1995   | 31,646  | 12,231  | 44,523 | 2      | 101.96 | 39.41  | 143.44 | 25 |
|                               |                 |        | 1996   | 31,206  | 12,814  | 42,661 | 1      | 99.54  | 40.88  | 136.08 | 25 |
|                               |                 |        | 1997   | 30,691  | 13,379  | 40,771 | 1      | 96.75  | 42.18  | 128.53 | 26 |
|                               |                 |        | 1998   | 30,104  | 13,819  | 38,852 | 1      | 93.53  | 42.93  | 120.71 | 27 |
|                               |                 |        | 1999   | 27,690  | 14,125  | 36,653 | 1      | 85.16  | 43.44  | 112.72 | 38 |
|                               |                 |        | 2000   | 28,937  | 14,060  | 35,796 | 1      | 88.30  | 42.90  | 109.23 | 31 |
|                               |                 |        | 2001   | 25,454  | 13,879  | 31,752 | 2      | 77.14  | 42.06  | 96.23  | 46 |
|                               | 2002            |        | 28,622 | 13,653  | 41,725  | 1      | 86.41  | 41.22  | 125.98 | 32     |    |
|                               | 2003            |        | 28,327 | 13,301  | 44,558  | 1      | 85.21  | 40.01  | 134.03 | 32     |    |
|                               | 2004            | 27,396 | 12,834 | 45,183  | 1       | 81.94  | 38.38  | 135.13 | 31     |        |    |
|                               | 2005            | 25,465 | 12,241 | 42,160  | 1       | 75.71  | 36.40  | 125.35 | 40     |        |    |
|                               | 2006            | 23,232 | 11,473 | 38,337  | 3       | 68.74  | 33.95  | 113.44 | 44     |        |    |
|                               | 2007            | 20,826 | 10,609 | 34,054  | 3       | 61.26  | 31.21  | 100.17 | 52     |        |    |

| Metropolitan Statistical Area | PWID Population | Year   | Number      | Min    | Max     | Rank   | Rate    | Min   | Max    | Rank  |        |    |
|-------------------------------|-----------------|--------|-------------|--------|---------|--------|---------|-------|--------|-------|--------|----|
| New York, NY                  | Young (15-29)   | 1992   | 21,150      | 7,065  | 33,312  | 2      | 106.64  | 35.62 | 167.97 | 36    |        |    |
|                               |                 | 1993   | 19,966      | 6,846  | 29,678  | 2      | 101.08  | 34.66 | 150.24 | 44    |        |    |
|                               |                 | 1994   | 18,117      | 6,866  | 27,274  | 1      | 92.25   | 34.96 | 138.88 | 42    |        |    |
|                               |                 | 1995   | 18,351      | 7,093  | 25,818  | 1      | 93.81   | 36.26 | 131.98 | 46    |        |    |
|                               |                 | 1996   | 18,354      | 7,537  | 25,092  | 1      | 93.62   | 38.44 | 127.98 | 46    |        |    |
|                               |                 | 1997   | 18,704      | 8,154  | 24,847  | 2      | 94.63   | 41.25 | 125.70 | 44    |        |    |
|                               |                 | 1998   | 19,298      | 8,858  | 24,905  | 2      | 96.57   | 44.33 | 124.63 | 45    |        |    |
|                               |                 | 1999   | 18,839      | 9,610  | 24,936  | 1      | 93.80   | 47.85 | 124.16 | 44    |        |    |
|                               |                 | 2000   | 20,963      | 10,185 | 25,931  | 2      | 104.21  | 50.63 | 128.91 | 42    |        |    |
|                               |                 | 2001   | 19,592      | 10,683 | 24,441  | 2      | 98.15   | 53.52 | 122.44 | 47    |        |    |
|                               |                 | 2002   | 23,242      | 11,086 | 33,882  | 2      | 117.50  | 56.05 | 171.30 | 36    |        |    |
|                               |                 | 2003   | 23,974      | 11,257 | 37,712  | 2      | 121.86  | 57.22 | 191.69 | 32    |        |    |
|                               |                 | 2004   | 23,754      | 11,128 | 39,176  | 2      | 121.04  | 56.70 | 199.62 | 32    |        |    |
|                               |                 | 2005   | 22,106      | 10,627 | 36,600  | 3      | 112.49  | 54.08 | 186.25 | 39    |        |    |
|                               |                 | 2006   | 19,602      | 9,680  | 32,348  | 3      | 99.69   | 49.23 | 164.52 | 48    |        |    |
|                               |                 | 2007   | 16,448      | 8,379  | 26,896  | 4      | 83.34   | 42.46 | 136.28 | 55    |        |    |
|                               |                 |        | Old (30-64) | 1992   | 89,749  | 29,980 | 141,359 | 1     | 233.61 | 78.04 | 367.95 | 15 |
|                               |                 |        |             | 1993   | 91,602  | 31,409 | 136,156 | 1     | 234.92 | 80.55 | 349.18 | 8  |
|                               |                 |        |             | 1994   | 86,182  | 32,663 | 129,742 | 1     | 218.17 | 82.69 | 328.45 | 15 |
|                               |                 |        |             | 1995   | 87,442  | 33,797 | 123,022 | 1     | 218.67 | 84.52 | 307.65 | 8  |
| 1996                          | 85,268          |        |             | 35,014 | 116,569 | 1      | 210.36  | 86.38 | 287.58 | 8     |        |    |
| 1997                          | 83,083          |        |             | 36,219 | 110,369 | 1      | 202.13  | 88.12 | 268.51 | 8     |        |    |
| 1998                          | 80,992          |        |             | 37,178 | 104,527 | 1      | 193.82  | 88.97 | 250.14 | 11    |        |    |
| 1999                          | 74,375          |        |             | 37,938 | 98,447  | 1      | 175.58  | 89.56 | 232.41 | 14    |        |    |
| 2000                          | 78,082          |        |             | 37,938 | 96,590  | 1      | 182.19  | 88.52 | 225.38 | 11    |        |    |
| 2001                          | 69,575          |        |             | 37,938 | 86,792  | 2      | 159.88  | 87.18 | 199.44 | 16    |        |    |
| 2002                          | 80,101          |        |             | 38,208 | 116,773 | 1      | 182.06  | 86.84 | 265.41 | 8     |        |    |
| 2003                          | 82,253          |        |             | 38,621 | 129,384 | 1      | 185.16  | 86.94 | 291.26 | 8     |        |    |
| 2004                          | 83,866          |        |             | 39,289 | 138,318 | 1      | 186.79  | 87.50 | 308.06 | 8     |        |    |
| 2005                          | 83,713          |        |             | 40,242 | 138,597 | 1      | 184.56  | 88.72 | 305.55 | 8     |        |    |
| 2006                          | 83,694          | 41,331 | 138,113     | 1      | 183.00  | 90.37  | 301.98  | 8     |        |       |        |    |
| 2007                          | 83,979          | 42,781 | 137,322     | 1      | 181.94  | 92.68  | 297.50  | 8     |        |       |        |    |



| Metropolitan Statistical Area | PWID Population | Year  | Number             | Min    | Max    | Rank  | Rate   | Min    | Max    | Rank  |        |    |
|-------------------------------|-----------------|-------|--------------------|--------|--------|-------|--------|--------|--------|-------|--------|----|
| Newark, NJ                    | Total           | 1992  | 22,952             | 17,418 | 30,577 | 19    | 177.50 | 134.71 | 236.47 | 22    |        |    |
|                               |                 | 1993  | 19,583             | 12,414 | 28,154 | 23    | 151.06 | 95.76  | 217.18 | 30    |        |    |
|                               |                 | 1994  | 20,991             | 17,551 | 25,718 | 18    | 161.64 | 135.15 | 198.04 | 21    |        |    |
|                               |                 | 1995  | 18,369             | 13,192 | 23,489 | 22    | 141.02 | 101.27 | 180.32 | 32    |        |    |
|                               |                 | 1996  | 17,779             | 13,682 | 21,500 | 23    | 135.76 | 104.48 | 164.18 | 33    |        |    |
|                               |                 | 1997  | 17,325             | 14,255 | 19,726 | 23    | 131.29 | 108.02 | 149.48 | 34    |        |    |
|                               |                 | 1998  | 17,015             | 14,992 | 18,116 | 23    | 127.91 | 112.70 | 136.19 | 32    |        |    |
|                               |                 | 1999  | 17,034             | 16,245 | 18,266 | 22    | 127.22 | 121.33 | 136.42 | 34    |        |    |
|                               |                 | 2000  | 16,522             | 15,194 | 18,475 | 23    | 122.69 | 112.83 | 137.19 | 36    |        |    |
|                               |                 | 2001  | 15,791             | 13,923 | 18,697 | 25    | 116.51 | 102.73 | 137.95 | 40    |        |    |
|                               |                 | 2002  | 15,985             | 12,752 | 18,898 | 24    | 117.25 | 93.53  | 138.62 | 35    |        |    |
|                               |                 | 2003  | 15,679             | 11,649 | 19,051 | 24    | 114.63 | 85.16  | 139.28 | 35    |        |    |
|                               |                 | 2004  | 15,545             | 10,625 | 19,184 | 24    | 113.44 | 77.54  | 140.00 | 32    |        |    |
|                               |                 | 2005  | 15,872             | 9,687  | 19,308 | 22    | 115.68 | 70.60  | 140.72 | 30    |        |    |
|                               |                 | 2006  | 16,267             | 8,824  | 21,455 | 22    | 118.33 | 64.19  | 156.07 | 28    |        |    |
|                               |                 | 2007  | 16,690             | 7,958  | 24,831 | 21    | 121.32 | 57.84  | 180.49 | 27    |        |    |
|                               |                 |       | Non-Hispanic White | 1992   | 6,922  | 5,253 | 9,221  | 33     | 84.43  | 64.07 | 112.48 | 44 |
|                               |                 |       |                    | 1993   | 6,039  | 3,828 | 8,682  | 35     | 74.34  | 47.13 | 106.88 | 53 |
|                               |                 |       |                    | 1994   | 6,632  | 5,545 | 8,125  | 32     | 82.33  | 68.84 | 100.87 | 47 |
|                               |                 |       |                    | 1995   | 5,956  | 4,278 | 7,616  | 34     | 74.45  | 53.47 | 95.20  | 52 |
| 1996                          | 5,926           |       |                    | 4,560  | 7,166  | 33    | 74.49  | 57.32  | 90.08  | 53    |        |    |
| 1997                          | 5,944           |       |                    | 4,891  | 6,768  | 34    | 74.91  | 61.63  | 85.29  | 53    |        |    |
| 1998                          | 6,016           |       |                    | 5,301  | 6,406  | 33    | 75.98  | 66.95  | 80.90  | 53    |        |    |
| 1999                          | 6,215           |       |                    | 5,927  | 6,664  | 34    | 78.69  | 75.04  | 84.38  | 52    |        |    |
| 2000                          | 6,225           |       |                    | 5,725  | 6,961  | 33    | 79.08  | 72.72  | 88.42  | 48    |        |    |
| 2001                          | 6,149           |       |                    | 5,422  | 7,281  | 35    | 78.36  | 69.09  | 92.78  | 54    |        |    |
| 2002                          | 6,437           |       |                    | 5,135  | 7,610  | 31    | 82.32  | 65.67  | 97.32  | 41    |        |    |
| 2003                          | 6,531           |       |                    | 4,852  | 7,935  | 31    | 83.94  | 62.36  | 101.99 | 41    |        |    |
| 2004                          | 6,698           |       |                    | 4,578  | 8,266  | 29    | 86.56  | 59.16  | 106.82 | 40    |        |    |
| 2005                          | 7,073           |       |                    | 4,317  | 8,604  | 28    | 91.89  | 56.08  | 111.78 | 40    |        |    |
| 2006                          | 7,492           |       |                    | 4,064  | 9,882  | 28    | 97.78  | 53.04  | 128.97 | 37    |        |    |
| 2007                          | 7,939           | 3,785 | 11,811             | 26     | 104.32 | 49.74 | 155.20 | 31     |        |       |        |    |

| Metropolitan Statistical Area | PWID Population    | Year     | Number | Min   | Max    | Rank   | Rate   | Min    | Max    | Rank   |    |
|-------------------------------|--------------------|----------|--------|-------|--------|--------|--------|--------|--------|--------|----|
| Newark, NJ                    | Non-Hispanic Black | 1992     | 12,077 | 9,165 | 16,089 | 8      | 423.28 | 321.23 | 563.91 | 27     |    |
|                               |                    | 1993     | 9,911  | 6,283 | 14,249 | 9      | 344.83 | 218.60 | 495.75 | 35     |    |
|                               |                    | 1994     | 10,211 | 8,538 | 12,511 | 9      | 353.30 | 295.40 | 432.85 | 29     |    |
|                               |                    | 1995     | 8,585  | 6,166 | 10,978 | 12     | 295.55 | 212.26 | 377.92 | 40     |    |
|                               |                    | 1996     | 7,983  | 6,143 | 9,654  | 12     | 272.68 | 209.84 | 329.75 | 39     |    |
|                               |                    | 1997     | 7,476  | 6,151 | 8,512  | 12     | 253.04 | 208.19 | 288.10 | 40     |    |
|                               |                    | 1998     | 7,061  | 6,221 | 7,518  | 13     | 236.53 | 208.41 | 251.84 | 38     |    |
|                               |                    | 1999     | 6,808  | 6,493 | 7,300  | 14     | 226.37 | 215.88 | 242.74 | 40     |    |
|                               |                    | 2000     | 6,373  | 5,861 | 7,126  | 13     | 211.04 | 194.07 | 235.97 | 38     |    |
|                               |                    | 2001     | 5,895  | 5,198 | 6,980  | 15     | 194.83 | 171.78 | 230.68 | 42     |    |
|                               |                    | 2002     | 5,796  | 4,624 | 6,852  | 15     | 190.86 | 152.26 | 225.64 | 37     |    |
|                               |                    | 2003     | 5,546  | 4,120 | 6,739  | 15     | 182.44 | 135.55 | 221.68 | 39     |    |
|                               |                    | 2004     | 5,393  | 3,686 | 6,655  | 15     | 177.39 | 121.25 | 218.91 | 39     |    |
|                               |                    | 2005     | 5,434  | 3,316 | 6,610  | 15     | 179.29 | 109.42 | 218.10 | 40     |    |
|                               |                    | 2006     | 5,535  | 3,003 | 7,300  | 15     | 182.94 | 99.24  | 241.29 | 39     |    |
|                               | 2007               | 5,691    | 2,713  | 8,466 | 15     | 188.26 | 89.76  | 280.08 | 39     |        |    |
|                               |                    | Hispanic | 1992   | 3,936 | 2,987  | 5,244  | 19     | 274.32 | 208.18 | 365.46 | 20 |
|                               |                    |          | 1993   | 3,334 | 2,114  | 4,793  | 22     | 223.03 | 141.38 | 320.64 | 28 |
|                               |                    |          | 1994   | 3,574 | 2,988  | 4,378  | 22     | 231.06 | 193.19 | 283.09 | 23 |
|                               |                    |          | 1995   | 3,147 | 2,260  | 4,024  | 24     | 196.23 | 140.93 | 250.93 | 28 |
|                               |                    |          | 1996   | 3,082 | 2,372  | 3,727  | 24     | 184.67 | 142.11 | 223.32 | 29 |
| 1997                          |                    |          | 3,053  | 2,512 | 3,476  | 25     | 175.83 | 144.67 | 200.20 | 27     |    |
| 1998                          |                    |          | 3,060  | 2,696 | 3,258  | 25     | 169.67 | 149.51 | 180.66 | 24     |    |
| 1999                          |                    |          | 3,136  | 2,991 | 3,363  | 24     | 168.64 | 160.82 | 180.83 | 21     |    |
| 2000                          |                    |          | 3,123  | 2,872 | 3,492  | 24     | 162.60 | 149.53 | 181.81 | 22     |    |
| 2001                          |                    |          | 3,071  | 2,707 | 3,636  | 24     | 153.68 | 135.50 | 181.96 | 23     |    |
| 2002                          |                    |          | 3,203  | 2,555 | 3,787  | 22     | 154.50 | 123.25 | 182.66 | 21     |    |
| 2003                          |                    |          | 3,242  | 2,408 | 3,939  | 21     | 151.68 | 112.69 | 184.30 | 21     |    |
| 2004                          |                    |          | 3,320  | 2,269 | 4,097  | 21     | 151.70 | 103.69 | 187.21 | 22     |    |
| 2005                          |                    |          | 3,506  | 2,139 | 4,264  | 20     | 156.22 | 95.34  | 190.04 | 21     |    |
| 2006                          |                    |          | 3,719  | 2,017 | 4,905  | 20     | 162.20 | 87.99  | 213.93 | 20     |    |
| 2007                          | 3,954              | 1,885    | 5,883  | 18    | 168.67 | 80.42  | 250.94 | 21     |        |        |    |

| Metropolitan Statistical Area | PWID Population | Year   | Number | Min    | Max    | Rank   | Rate   | Min    | Max    | Rank |
|-------------------------------|-----------------|--------|--------|--------|--------|--------|--------|--------|--------|------|
| Newark, NJ                    | Male            | 1992   | 15,335 | 11,638 | 20,430 | 14     | 243.04 | 184.44 | 323.78 | 20   |
|                               |                 | 1993   | 13,125 | 8,320  | 18,870 | 21     | 207.48 | 131.53 | 298.29 | 31   |
|                               |                 | 1994   | 14,097 | 11,787 | 17,272 | 17     | 222.41 | 185.96 | 272.49 | 23   |
|                               |                 | 1995   | 12,349 | 8,868  | 15,790 | 21     | 194.14 | 139.43 | 248.25 | 31   |
|                               |                 | 1996   | 11,952 | 9,198  | 14,454 | 22     | 186.93 | 143.85 | 226.05 | 32   |
|                               |                 | 1997   | 11,638 | 9,575  | 13,250 | 21     | 180.66 | 148.64 | 205.69 | 32   |
|                               |                 | 1998   | 11,411 | 10,054 | 12,149 | 21     | 175.74 | 154.85 | 187.12 | 32   |
|                               |                 | 1999   | 11,398 | 10,870 | 12,222 | 20     | 174.42 | 166.34 | 187.03 | 33   |
|                               |                 | 2000   | 11,023 | 10,137 | 12,326 | 21     | 167.70 | 154.22 | 187.52 | 31   |
|                               |                 | 2001   | 10,499 | 9,257  | 12,431 | 25     | 158.53 | 139.78 | 187.70 | 35   |
|                               |                 | 2002   | 10,586 | 8,445  | 12,515 | 22     | 158.69 | 126.59 | 187.61 | 32   |
|                               |                 | 2003   | 10,338 | 7,681  | 12,562 | 22     | 154.28 | 114.63 | 187.47 | 34   |
|                               |                 | 2004   | 10,202 | 6,973  | 12,590 | 23     | 151.86 | 103.79 | 187.40 | 33   |
|                               |                 | 2005   | 10,365 | 6,326  | 12,609 | 21     | 153.87 | 93.91  | 187.18 | 31   |
|                               |                 | 2006   | 10,569 | 5,733  | 13,939 | 20     | 156.40 | 84.84  | 206.29 | 27   |
|                               | 2007            | 10,787 | 5,143  | 16,049 | 20     | 159.28 | 75.94  | 236.97 | 27     |      |
|                               | Female          | 1992   | 7,604  | 5,770  | 10,130 | 19     | 114.85 | 87.16  | 153.00 | 23   |
|                               |                 | 1993   | 6,457  | 4,093  | 9,283  | 22     | 97.28  | 61.67  | 139.85 | 29   |
|                               |                 | 1994   | 6,922  | 5,787  | 8,480  | 19     | 104.12 | 87.06  | 127.57 | 29   |
|                               |                 | 1995   | 6,082  | 4,368  | 7,777  | 23     | 91.24  | 65.53  | 116.67 | 33   |
|                               |                 | 1996   | 5,929  | 4,562  | 7,170  | 23     | 88.47  | 68.08  | 106.98 | 33   |
|                               |                 | 1997   | 5,832  | 4,798  | 6,640  | 23     | 86.34  | 71.04  | 98.31  | 34   |
|                               |                 | 1998   | 5,789  | 5,101  | 6,164  | 23     | 85.02  | 74.92  | 90.53  | 38   |
|                               |                 | 1999   | 5,862  | 5,590  | 6,286  | 23     | 85.52  | 81.55  | 91.70  | 36   |
|                               |                 | 2000   | 5,748  | 5,286  | 6,427  | 24     | 83.38  | 76.68  | 93.24  | 37   |
| 2001                          |                 | 5,548  | 4,892  | 6,569  | 27     | 80.05  | 70.58  | 94.78  | 40     |      |
| 2002                          | 5,660           | 4,515  | 6,692  | 24     | 81.30  | 64.85  | 96.11  | 35     |        |      |
| 2003                          | 5,580           | 4,146  | 6,781  | 25     | 79.98  | 59.42  | 97.18  | 35     |        |      |
| 2004                          | 5,542           | 3,788  | 6,839  | 24     | 79.35  | 54.23  | 97.92  | 36     |        |      |
| 2005                          | 5,644           | 3,444  | 6,865  | 24     | 80.80  | 49.31  | 98.29  | 32     |        |      |
| 2006                          | 5,740           | 3,114  | 7,571  | 24     | 82.12  | 44.55  | 108.31 | 29     |        |      |
| 2007                          | 5,810           | 2,770  | 8,644  | 23     | 83.19  | 39.66  | 123.76 | 28     |        |      |

| Metropolitan Statistical Area | PWID Population | Year  | Number      | Min    | Max    | Rank   | Rate   | Min    | Max    | Rank   |        |    |
|-------------------------------|-----------------|-------|-------------|--------|--------|--------|--------|--------|--------|--------|--------|----|
| Newark, NJ                    | Young (15-29)   | 1992  | 5,707       | 4,331  | 7,603  | 20     | 140.88 | 106.92 | 187.69 | 20     |        |    |
|                               |                 | 1993  | 4,871       | 3,088  | 7,003  | 21     | 122.95 | 77.94  | 176.76 | 26     |        |    |
|                               |                 | 1994  | 5,289       | 4,423  | 6,481  | 19     | 136.57 | 114.19 | 167.33 | 20     |        |    |
|                               |                 | 1995  | 4,737       | 3,402  | 6,057  | 21     | 124.52 | 89.43  | 159.22 | 26     |        |    |
|                               |                 | 1996  | 4,727       | 3,638  | 5,716  | 21     | 125.82 | 96.82  | 152.15 | 25     |        |    |
|                               |                 | 1997  | 4,774       | 3,928  | 5,435  | 20     | 127.94 | 105.26 | 145.67 | 24     |        |    |
|                               |                 | 1998  | 4,871       | 4,292  | 5,186  | 20     | 130.83 | 115.28 | 139.30 | 24     |        |    |
|                               |                 | 1999  | 5,069       | 4,834  | 5,435  | 19     | 136.45 | 130.12 | 146.31 | 24     |        |    |
|                               |                 | 2000  | 5,100       | 4,690  | 5,703  | 20     | 137.86 | 126.78 | 154.15 | 21     |        |    |
|                               |                 | 2001  | 5,037       | 4,441  | 5,963  | 21     | 136.83 | 120.64 | 162.01 | 28     |        |    |
|                               |                 | 2002  | 5,236       | 4,177  | 6,191  | 22     | 142.34 | 113.55 | 168.28 | 23     |        |    |
|                               |                 | 2003  | 5,234       | 3,888  | 6,359  | 22     | 141.74 | 105.31 | 172.23 | 25     |        |    |
|                               |                 | 2004  | 5,236       | 3,579  | 6,462  | 22     | 141.12 | 96.46  | 174.15 | 24     |        |    |
|                               |                 | 2005  | 5,332       | 3,254  | 6,487  | 23     | 142.56 | 87.01  | 173.42 | 26     |        |    |
|                               |                 | 2006  | 5,376       | 2,916  | 7,091  | 20     | 142.33 | 77.21  | 187.72 | 25     |        |    |
|                               |                 | 2007  | 5,340       | 2,546  | 7,945  | 22     | 140.39 | 66.94  | 208.87 | 25     |        |    |
|                               |                 |       | Old (30-64) | 1992   | 17,510 | 13,288 | 23,327 | 15     | 197.20 | 149.65 | 262.71 | 20 |
|                               |                 |       |             | 1993   | 14,832 | 9,402  | 21,324 | 21     | 164.77 | 104.45 | 236.88 | 29 |
|                               |                 |       |             | 1994   | 15,777 | 13,191 | 19,330 | 18     | 173.13 | 144.75 | 212.11 | 24 |
|                               |                 |       |             | 1995   | 13,696 | 9,836  | 17,513 | 24     | 148.51 | 106.66 | 189.90 | 32 |
|                               |                 |       |             | 1996   | 13,145 | 10,115 | 15,896 | 24     | 140.75 | 108.32 | 170.21 | 36 |
| 1997                          | 12,694          |       |             | 10,444 | 14,453 | 24     | 134.11 | 110.34 | 152.70 | 36     |        |    |
| 1998                          | 12,346          |       |             | 10,879 | 13,145 | 25     | 128.89 | 113.57 | 137.23 | 38     |        |    |
| 1999                          | 12,233          |       |             | 11,666 | 13,117 | 25     | 126.44 | 120.58 | 135.58 | 36     |        |    |
| 2000                          | 11,734          |       |             | 10,791 | 13,120 | 24     | 120.14 | 110.48 | 134.33 | 38     |        |    |
| 2001                          | 11,085          |       |             | 9,773  | 13,125 | 26     | 112.28 | 99.00  | 132.94 | 41     |        |    |
| 2002                          | 11,086          |       |             | 8,844  | 13,106 | 25     | 111.37 | 88.84  | 131.66 | 36     |        |    |
| 2003                          | 10,741          |       |             | 7,980  | 13,052 | 25     | 107.56 | 79.91  | 130.70 | 36     |        |    |
| 2004                          | 10,520          |       |             | 7,190  | 12,982 | 24     | 105.28 | 71.96  | 129.92 | 37     |        |    |
| 2005                          | 10,610          |       |             | 6,475  | 12,907 | 24     | 106.30 | 64.88  | 129.32 | 31     |        |    |
| 2006                          | 10,740          |       |             | 5,826  | 14,166 | 23     | 107.73 | 58.44  | 142.09 | 28     |        |    |
| 2007                          | 10,880          | 5,187 | 16,187      | 22     | 109.31 | 52.12  | 162.62 | 26     |        |        |        |    |

| Metropolitan Statistical Area                 | PWID Population | Year  | Number             | Min   | Max    | Rank  | Rate   | Min   | Max    | Rank  |       |    |
|-----------------------------------------------|-----------------|-------|--------------------|-------|--------|-------|--------|-------|--------|-------|-------|----|
| Norfolk--Virginia Beach--Newport News, VA--NC | Total           | 1992  | 7,990              | 5,919 | 9,794  | 57    | 78.94  | 58.48 | 96.77  | 72    |       |    |
|                                               |                 | 1993  | 7,844              | 5,185 | 11,035 | 51    | 76.53  | 50.59 | 107.66 | 70    |       |    |
|                                               |                 | 1994  | 9,385              | 6,822 | 12,116 | 46    | 91.13  | 66.25 | 117.66 | 60    |       |    |
|                                               |                 | 1995  | 8,788              | 5,029 | 13,182 | 45    | 84.95  | 48.61 | 127.42 | 61    |       |    |
|                                               |                 | 1996  | 9,267              | 4,962 | 14,205 | 45    | 89.09  | 47.71 | 136.56 | 54    |       |    |
|                                               |                 | 1997  | 9,503              | 4,874 | 14,282 | 44    | 91.02  | 46.69 | 136.80 | 53    |       |    |
|                                               |                 | 1998  | 9,482              | 4,759 | 13,755 | 41    | 91.00  | 45.67 | 132.01 | 54    |       |    |
|                                               |                 | 1999  | 11,142             | 8,430 | 13,211 | 38    | 105.97 | 80.18 | 125.65 | 46    |       |    |
|                                               |                 | 2000  | 9,439              | 4,713 | 12,482 | 42    | 88.67  | 44.28 | 117.25 | 56    |       |    |
|                                               |                 | 2001  | 10,744             | 7,667 | 13,125 | 40    | 100.38 | 71.64 | 122.63 | 51    |       |    |
|                                               |                 | 2002  | 9,107              | 4,468 | 13,913 | 45    | 83.96  | 41.19 | 128.27 | 59    |       |    |
|                                               |                 | 2003  | 9,104              | 4,352 | 14,728 | 45    | 82.94  | 39.64 | 134.17 | 58    |       |    |
|                                               |                 | 2004  | 9,201              | 4,234 | 15,625 | 45    | 82.64  | 38.03 | 140.35 | 58    |       |    |
|                                               |                 | 2005  | 9,264              | 4,042 | 16,416 | 45    | 82.84  | 36.15 | 146.81 | 57    |       |    |
|                                               |                 | 2006  | 9,418              | 3,874 | 17,350 | 43    | 83.33  | 34.28 | 153.51 | 57    |       |    |
|                                               |                 | 2007  | 9,451              | 3,625 | 18,070 | 45    | 83.81  | 32.15 | 160.25 | 57    |       |    |
|                                               |                 |       | Non-Hispanic White | 1992  | 3,488  | 2,584 | 4,276  | 65    | 51.34  | 38.03 | 62.93 | 72 |
|                                               |                 |       |                    | 1993  | 3,365  | 2,224 | 4,734  | 63    | 49.27  | 32.57 | 69.31 | 67 |
|                                               |                 |       |                    | 1994  | 3,958  | 2,877 | 5,110  | 58    | 58.10  | 42.24 | 75.01 | 63 |
|                                               |                 |       |                    | 1995  | 3,649  | 2,088 | 5,473  | 61    | 53.81  | 30.79 | 80.72 | 64 |
| 1996                                          | 3,796           |       |                    | 2,033 | 5,819  | 57    | 56.21  | 30.10 | 86.16  | 63    |       |    |
| 1997                                          | 3,851           |       |                    | 1,975 | 5,788  | 54    | 57.36  | 29.42 | 86.21  | 62    |       |    |
| 1998                                          | 3,817           |       |                    | 1,915 | 5,537  | 53    | 57.47  | 28.84 | 83.37  | 63    |       |    |
| 1999                                          | 4,475           |       |                    | 3,386 | 5,306  | 46    | 67.38  | 50.99 | 79.90  | 60    |       |    |
| 2000                                          | 3,803           |       |                    | 1,899 | 5,029  | 55    | 57.01  | 28.47 | 75.40  | 66    |       |    |
| 2001                                          | 4,370           |       |                    | 3,118 | 5,338  | 49    | 65.47  | 46.72 | 79.98  | 59    |       |    |
| 2002                                          | 3,764           |       |                    | 1,847 | 5,751  | 57    | 55.94  | 27.45 | 85.47  | 66    |       |    |
| 2003                                          | 3,853           |       |                    | 1,842 | 6,233  | 56    | 56.80  | 27.15 | 91.90  | 66    |       |    |
| 2004                                          | 4,016           |       |                    | 1,848 | 6,820  | 53    | 58.64  | 26.98 | 99.59  | 66    |       |    |
| 2005                                          | 4,200           |       |                    | 1,833 | 7,443  | 56    | 61.47  | 26.83 | 108.94 | 66    |       |    |
| 2006                                          | 4,465           |       |                    | 1,837 | 8,226  | 55    | 65.09  | 26.77 | 119.91 | 62    |       |    |
| 2007                                          | 4,713           | 1,808 | 9,012              | 51    | 69.23  | 26.56 | 132.37 | 61    |        |       |       |    |

| Metropolitan Statistical Area                 | PWID Population    | Year | Number   | Min   | Max   | Rank  | Rate   | Min    | Max    | Rank  |       |    |
|-----------------------------------------------|--------------------|------|----------|-------|-------|-------|--------|--------|--------|-------|-------|----|
| Norfolk--Virginia Beach--Newport News, VA--NC | Non-Hispanic Black | 1992 | 4,181    | 3,097 | 5,125 | 25    | 150.06 | 111.17 | 183.95 | 88    |       |    |
|                                               |                    | 1993 | 4,121    | 2,724 | 5,798 | 26    | 144.35 | 95.42  | 203.07 | 86    |       |    |
|                                               |                    | 1994 | 4,955    | 3,602 | 6,397 | 22    | 170.55 | 123.98 | 220.19 | 80    |       |    |
|                                               |                    | 1995 | 4,662    | 2,668 | 6,993 | 20    | 157.49 | 90.12  | 236.23 | 76    |       |    |
|                                               |                    | 1996 | 4,933    | 2,642 | 7,562 | 17    | 163.54 | 87.57  | 250.68 | 72    |       |    |
|                                               |                    | 1997 | 5,065    | 2,598 | 7,612 | 17    | 165.02 | 84.64  | 248.02 | 65    |       |    |
|                                               |                    | 1998 | 5,042    | 2,530 | 7,315 | 17    | 162.54 | 81.57  | 235.79 | 65    |       |    |
|                                               |                    | 1999 | 5,884    | 4,453 | 6,978 | 16    | 185.94 | 140.70 | 220.49 | 52    |       |    |
|                                               |                    | 2000 | 4,923    | 2,458 | 6,510 | 17    | 152.51 | 76.16  | 201.68 | 64    |       |    |
|                                               |                    | 2001 | 5,494    | 3,921 | 6,712 | 17    | 168.39 | 120.17 | 205.70 | 57    |       |    |
|                                               |                    | 2002 | 4,527    | 2,221 | 6,917 | 17    | 136.25 | 66.84  | 208.16 | 64    |       |    |
|                                               |                    | 2003 | 4,355    | 2,082 | 7,046 | 17    | 128.88 | 61.60  | 208.50 | 64    |       |    |
|                                               |                    | 2004 | 4,184    | 1,925 | 7,106 | 17    | 121.82 | 56.06  | 206.88 | 65    |       |    |
|                                               |                    | 2005 | 3,949    | 1,723 | 6,998 | 19    | 113.48 | 49.52  | 201.09 | 66    |       |    |
|                                               |                    | 2006 | 3,704    | 1,523 | 6,823 | 20    | 104.61 | 43.03  | 192.71 | 69    |       |    |
|                                               |                    | 2007 | 3,369    | 1,292 | 6,441 | 21    | 94.78  | 36.36  | 181.21 | 77    |       |    |
|                                               |                    |      | Hispanic | 1992  | 68    | 51    | 84     | 82     | 28.85  | 21.37 | 35.36 | 95 |
|                                               |                    |      |          | 1993  | 81    | 53    | 114    | 77     | 32.98  | 21.80 | 46.40 | 92 |
|                                               |                    |      |          | 1994  | 113   | 82    | 145    | 77     | 45.05  | 32.75 | 58.16 | 86 |
|                                               |                    |      |          | 1995  | 119   | 68    | 179    | 74     | 45.62  | 26.11 | 68.44 | 81 |
| 1996                                          | 138                |      |          | 74    | 211   | 72    | 50.10  | 26.83  | 76.79  | 74    |       |    |
| 1997                                          | 152                |      |          | 78    | 229   | 71    | 52.94  | 27.15  | 79.56  | 73    |       |    |
| 1998                                          | 161                |      |          | 81    | 233   | 70    | 53.97  | 27.08  | 78.29  | 71    |       |    |
| 1999                                          | 198                |      |          | 150   | 235   | 68    | 63.29  | 47.89  | 75.05  | 64    |       |    |
| 2000                                          | 175                |      |          | 87    | 231   | 71    | 52.70  | 26.32  | 69.69  | 65    |       |    |
| 2001                                          | 208                |      |          | 148   | 254   | 69    | 60.23  | 42.98  | 73.58  | 63    |       |    |
| 2002                                          | 186                |      |          | 91    | 283   | 69    | 50.82  | 24.93  | 77.64  | 63    |       |    |
| 2003                                          | 198                |      |          | 94    | 320   | 69    | 52.53  | 25.11  | 84.97  | 63    |       |    |
| 2004                                          | 217                |      |          | 100   | 368   | 69    | 53.81  | 24.76  | 91.39  | 63    |       |    |
| 2005                                          | 243                |      |          | 106   | 431   | 68    | 57.85  | 25.24  | 102.52 | 61    |       |    |
| 2006                                          | 284                | 117  | 524      | 67    | 63.79 | 26.24 | 117.52 | 58     |        |       |       |    |
| 2007                                          | 340                | 131  | 651      | 65    | 74.77 | 28.68 | 142.96 | 54     |        |       |       |    |

| Metropolitan Statistical Area                 | PWID Population | Year   | Number | Min    | Max    | Rank   | Rate   | Min    | Max    | Rank   |    |
|-----------------------------------------------|-----------------|--------|--------|--------|--------|--------|--------|--------|--------|--------|----|
| Norfolk--Virginia Beach--Newport News, VA--NC | Male            | 1992   | 4,490  | 3,326  | 5,504  | 62     | 86.74  | 64.26  | 106.33 | 87     |    |
|                                               |                 | 1993   | 4,461  | 2,949  | 6,276  | 60     | 85.46  | 56.49  | 120.23 | 82     |    |
|                                               |                 | 1994   | 5,371  | 3,904  | 6,934  | 52     | 102.89 | 74.79  | 132.84 | 75     |    |
|                                               |                 | 1995   | 5,038  | 2,883  | 7,556  | 49     | 96.39  | 55.16  | 144.58 | 71     |    |
|                                               |                 | 1996   | 5,302  | 2,839  | 8,127  | 44     | 101.21 | 54.20  | 155.14 | 65     |    |
|                                               |                 | 1997   | 5,413  | 2,776  | 8,135  | 45     | 103.21 | 52.94  | 155.11 | 63     |    |
|                                               |                 | 1998   | 5,368  | 2,694  | 7,788  | 45     | 102.85 | 51.61  | 149.20 | 61     |    |
|                                               |                 | 1999   | 6,267  | 4,742  | 7,431  | 43     | 119.05 | 90.08  | 141.17 | 56     |    |
|                                               |                 | 2000   | 5,277  | 2,635  | 6,978  | 47     | 99.01  | 49.45  | 130.93 | 63     |    |
|                                               |                 | 2001   | 5,980  | 4,267  | 7,305  | 44     | 111.67 | 79.69  | 136.41 | 58     |    |
|                                               |                 | 2002   | 5,059  | 2,482  | 7,730  | 47     | 93.45  | 45.85  | 142.78 | 66     |    |
|                                               |                 | 2003   | 5,067  | 2,422  | 8,198  | 47     | 93.23  | 44.56  | 150.82 | 65     |    |
|                                               |                 | 2004   | 5,156  | 2,372  | 8,756  | 48     | 93.35  | 42.95  | 158.53 | 63     |    |
|                                               |                 | 2005   | 5,256  | 2,294  | 9,314  | 48     | 95.06  | 41.48  | 168.46 | 62     |    |
|                                               |                 | 2006   | 5,445  | 2,240  | 10,031 | 48     | 96.96  | 39.88  | 178.62 | 61     |    |
|                                               | 2007            | 5,607  | 2,151  | 10,720 | 47     | 100.26 | 38.46  | 191.70 | 59     |        |    |
|                                               |                 | Female | 1992   | 3,150  | 2,333  | 3,861  | 45     | 63.69  | 47.18  | 78.07  | 61 |
|                                               |                 |        | 1993   | 3,140  | 2,076  | 4,417  | 42     | 62.42  | 41.26  | 87.81  | 56 |
|                                               |                 |        | 1994   | 3,818  | 2,775  | 4,929  | 39     | 75.19  | 54.66  | 97.07  | 46 |
|                                               |                 |        | 1995   | 3,635  | 2,080  | 5,452  | 39     | 71.00  | 40.63  | 106.50 | 49 |
|                                               |                 |        | 1996   | 3,894  | 2,085  | 5,969  | 37     | 75.42  | 40.39  | 115.61 | 46 |
|                                               |                 |        | 1997   | 4,053  | 2,079  | 6,091  | 35     | 78.00  | 40.01  | 117.23 | 46 |
|                                               |                 |        | 1998   | 4,096  | 2,056  | 5,942  | 35     | 78.78  | 39.54  | 114.28 | 45 |
|                                               |                 |        | 1999   | 4,864  | 3,680  | 5,767  | 34     | 92.64  | 70.10  | 109.85 | 31 |
|                                               |                 |        | 2000   | 4,151  | 2,073  | 5,489  | 37     | 78.09  | 39.00  | 103.27 | 46 |
|                                               | 2001            |        | 4,742  | 3,384  | 5,793  | 35     | 88.67  | 63.28  | 108.32 | 33     |    |
|                                               | 2002            | 4,017  | 1,971  | 6,137  | 39     | 73.93  | 36.27  | 112.95 | 44     |        |    |
|                                               | 2003            | 3,992  | 1,908  | 6,459  | 40     | 72.05  | 34.44  | 116.56 | 43     |        |    |
|                                               | 2004            | 3,989  | 1,835  | 6,774  | 39     | 71.10  | 32.72  | 120.75 | 46     |        |    |
|                                               | 2005            | 3,944  | 1,721  | 6,988  | 39     | 69.76  | 30.44  | 123.62 | 46     |        |    |
|                                               | 2006            | 3,907  | 1,607  | 7,198  | 38     | 68.71  | 28.26  | 126.59 | 45     |        |    |
|                                               | 2007            | 3,788  | 1,453  | 7,242  | 40     | 66.63  | 25.56  | 127.40 | 46     |        |    |

| Metropolitan Statistical Area                 | PWID Population | Year  | Number      | Min    | Max    | Rank  | Rate   | Min    | Max    | Rank  |        |    |
|-----------------------------------------------|-----------------|-------|-------------|--------|--------|-------|--------|--------|--------|-------|--------|----|
| Norfolk--Virginia Beach--Newport News, VA--NC | Young (15-29)   | 1992  | 997         | 739    | 1,222  | 80    | 25.62  | 18.98  | 31.41  | 100   |        |    |
|                                               |                 | 1993  | 1,143       | 755    | 1,607  | 77    | 29.87  | 19.74  | 42.02  | 96    |        |    |
|                                               |                 | 1994  | 1,572       | 1,143  | 2,030  | 69    | 42.18  | 30.66  | 54.46  | 85    |        |    |
|                                               |                 | 1995  | 1,668       | 954    | 2,502  | 61    | 45.49  | 26.03  | 68.23  | 81    |        |    |
|                                               |                 | 1996  | 1,962       | 1,051  | 3,008  | 53    | 54.13  | 28.99  | 82.98  | 68    |        |    |
|                                               |                 | 1997  | 2,212       | 1,134  | 3,324  | 49    | 61.62  | 31.60  | 92.61  | 62    |        |    |
|                                               |                 | 1998  | 2,390       | 1,199  | 3,467  | 46    | 67.42  | 33.84  | 97.81  | 61    |        |    |
|                                               |                 | 1999  | 2,996       | 2,267  | 3,553  | 37    | 84.49  | 63.93  | 100.18 | 54    |        |    |
|                                               |                 | 2000  | 2,670       | 1,333  | 3,530  | 45    | 74.85  | 37.38  | 98.98  | 59    |        |    |
|                                               |                 | 2001  | 3,150       | 2,248  | 3,848  | 38    | 88.71  | 63.31  | 108.37 | 58    |        |    |
|                                               |                 | 2002  | 2,728       | 1,338  | 4,168  | 46    | 75.62  | 37.10  | 115.54 | 65    |        |    |
|                                               |                 | 2003  | 2,746       | 1,313  | 4,442  | 47    | 75.62  | 36.14  | 122.33 | 66    |        |    |
|                                               |                 | 2004  | 2,752       | 1,266  | 4,674  | 51    | 74.02  | 34.06  | 125.71 | 73    |        |    |
|                                               |                 | 2005  | 2,704       | 1,180  | 4,793  | 54    | 72.44  | 31.61  | 128.38 | 76    |        |    |
|                                               |                 | 2006  | 2,639       | 1,085  | 4,862  | 55    | 69.14  | 28.44  | 127.37 | 78    |        |    |
|                                               |                 | 2007  | 2,497       | 958    | 4,774  | 58    | 65.92  | 25.28  | 126.03 | 82    |        |    |
|                                               |                 |       | Old (30-64) | 1992   | 5,359  | 3,970 | 6,569  | 59     | 86.01  | 63.72 | 105.44 | 75 |
|                                               |                 |       |             | 1993   | 5,648  | 3,733 | 7,945  | 54     | 87.91  | 58.11 | 123.67 | 68 |
|                                               |                 |       |             | 1994   | 7,047  | 5,123 | 9,098  | 48     | 107.26 | 77.97 | 138.47 | 57 |
|                                               |                 |       |             | 1995   | 6,753  | 3,864 | 10,130 | 43     | 101.12 | 57.87 | 151.68 | 55 |
|                                               | 1996            | 7,191 |             | 3,851  | 11,023 | 42    | 106.11 | 56.82  | 162.66 | 48    |        |    |
|                                               | 1997            | 7,372 |             | 3,781  | 11,079 | 39    | 107.61 | 55.20  | 161.74 | 48    |        |    |
|                                               | 1998            | 7,296 |             | 3,662  | 10,584 | 40    | 106.12 | 53.26  | 153.95 | 46    |        |    |
|                                               | 1999            | 8,451 |             | 6,394  | 10,020 | 38    | 121.29 | 91.77  | 143.82 | 38    |        |    |
|                                               | 2000            | 7,025 |             | 3,508  | 9,290  | 41    | 99.25  | 49.56  | 131.25 | 51    |        |    |
|                                               | 2001            | 7,828 |             | 5,587  | 9,563  | 39    | 109.45 | 78.11  | 133.71 | 44    |        |    |
|                                               | 2002            | 6,499 |             | 3,188  | 9,929  | 41    | 89.77  | 44.04  | 137.15 | 54    |        |    |
|                                               | 2003            | 6,387 |             | 3,053  | 10,333 | 41    | 86.96  | 41.56  | 140.67 | 53    |        |    |
|                                               | 2004            | 6,394 |             | 2,942  | 10,859 | 41    | 86.23  | 39.68  | 146.44 | 53    |        |    |
|                                               | 2005            | 6,449 | 2,814       | 11,428 | 40     | 86.57 | 37.78  | 153.42 | 47     |       |        |    |
|                                               | 2006            | 6,658 | 2,738       | 12,265 | 36     | 88.94 | 36.58  | 163.85 | 45     |       |        |    |
|                                               | 2007            | 6,883 | 2,640       | 13,160 | 34     | 91.91 | 35.25  | 175.73 | 36     |       |        |    |



| Metropolitan Statistical Area | PWID Population | Year  | Number             | Min    | Max    | Rank  | Rate   | Min    | Max    | Rank   |        |    |
|-------------------------------|-----------------|-------|--------------------|--------|--------|-------|--------|--------|--------|--------|--------|----|
| Oakland, CA                   | Total           | 1992  | 23,412             | 21,305 | 27,398 | 16    | 159.98 | 145.58 | 187.21 | 27     |        |    |
|                               |                 | 1993  | 27,443             | 21,040 | 40,852 | 11    | 186.91 | 143.31 | 278.25 | 16     |        |    |
|                               |                 | 1994  | 22,531             | 20,609 | 25,377 | 16    | 153.25 | 140.17 | 172.61 | 28     |        |    |
|                               |                 | 1995  | 25,835             | 20,327 | 36,420 | 13    | 175.02 | 137.70 | 246.72 | 17     |        |    |
|                               |                 | 1996  | 25,038             | 20,313 | 34,340 | 14    | 168.01 | 136.30 | 230.43 | 18     |        |    |
|                               |                 | 1997  | 24,558             | 21,113 | 32,674 | 14    | 160.88 | 138.32 | 214.05 | 17     |        |    |
|                               |                 | 1998  | 24,036             | 18,592 | 30,987 | 14    | 153.33 | 118.60 | 197.67 | 19     |        |    |
|                               |                 | 1999  | 21,638             | 17,252 | 24,099 | 15    | 135.12 | 107.73 | 150.49 | 28     |        |    |
|                               |                 | 2000  | 23,225             | 18,694 | 26,289 | 13    | 141.99 | 114.29 | 160.73 | 22     |        |    |
|                               |                 | 2001  | 23,006             | 21,837 | 25,332 | 14    | 137.97 | 130.96 | 151.92 | 26     |        |    |
|                               |                 | 2002  | 22,385             | 19,457 | 25,502 | 17    | 133.98 | 116.46 | 152.64 | 26     |        |    |
|                               |                 | 2003  | 21,120             | 17,237 | 25,630 | 17    | 126.37 | 103.14 | 153.36 | 28     |        |    |
|                               |                 | 2004  | 19,625             | 14,232 | 25,761 | 18    | 117.39 | 85.13  | 154.09 | 30     |        |    |
|                               |                 | 2005  | 18,655             | 11,216 | 25,970 | 18    | 111.21 | 66.86  | 154.82 | 33     |        |    |
|                               |                 | 2006  | 18,714             | 8,192  | 27,559 | 19    | 111.02 | 48.60  | 163.50 | 31     |        |    |
|                               |                 | 2007  | 19,026             | 5,233  | 32,754 | 19    | 111.83 | 30.76  | 192.51 | 31     |        |    |
|                               |                 |       | Non-Hispanic White | 1992   | 9,852  | 8,965 | 11,529 | 23     | 117.30 | 106.75 | 137.27 | 28 |
|                               |                 |       |                    | 1993   | 11,404 | 8,744 | 16,977 | 18     | 138.18 | 105.94 | 205.70 | 21 |
|                               |                 |       |                    | 1994   | 9,149  | 8,369 | 10,305 | 24     | 112.94 | 103.30 | 127.20 | 27 |
|                               |                 |       |                    | 1995   | 10,168 | 8,000 | 14,334 | 19     | 127.42 | 100.25 | 179.62 | 21 |
| 1996                          | 9,497           |       |                    | 7,705  | 13,025 | 21    | 120.01 | 97.36  | 164.60 | 22     |        |    |
| 1997                          | 8,950           |       |                    | 7,695  | 11,908 | 24    | 112.22 | 96.48  | 149.31 | 24     |        |    |
| 1998                          | 8,416           |       |                    | 6,510  | 10,850 | 24    | 104.30 | 80.68  | 134.46 | 27     |        |    |
| 1999                          | 7,302           |       |                    | 5,822  | 8,133  | 26    | 89.98  | 71.74  | 100.21 | 40     |        |    |
| 2000                          | 7,605           |       |                    | 6,121  | 8,608  | 27    | 93.17  | 74.99  | 105.46 | 37     |        |    |
| 2001                          | 7,385           |       |                    | 7,010  | 8,131  | 25    | 90.32  | 85.73  | 99.44  | 39     |        |    |
| 2002                          | 7,143           |       |                    | 6,209  | 8,138  | 26    | 88.66  | 77.06  | 101.00 | 39     |        |    |
| 2003                          | 6,815           |       |                    | 5,562  | 8,271  | 28    | 85.76  | 69.99  | 104.07 | 39     |        |    |
| 2004                          | 6,532           |       |                    | 4,737  | 8,574  | 31    | 83.36  | 60.45  | 109.42 | 43     |        |    |
| 2005                          | 6,541           |       |                    | 3,933  | 9,107  | 31    | 84.50  | 50.80  | 117.63 | 43     |        |    |
| 2006                          | 7,062           |       |                    | 3,091  | 10,399 | 29    | 92.15  | 40.34  | 135.71 | 41     |        |    |
| 2007                          | 7,876           | 2,166 | 13,559             | 27     | 103.31 | 28.41 | 177.84 | 32     |        |        |        |    |

| Metropolitan Statistical Area | PWID Population    | Year  | Number   | Min   | Max    | Rank  | Rate   | Min    | Max    | Rank   |        |    |
|-------------------------------|--------------------|-------|----------|-------|--------|-------|--------|--------|--------|--------|--------|----|
| Oakland, CA                   | Non-Hispanic Black | 1992  | 8,032    | 7,309 | 9,399  | 14    | 395.33 | 359.75 | 462.62 | 31     |        |    |
|                               |                    | 1993  | 9,811    | 7,522 | 14,605 | 11    | 485.94 | 372.57 | 723.39 | 13     |        |    |
|                               |                    | 1994  | 8,353    | 7,640 | 9,408  | 12    | 416.61 | 381.06 | 469.23 | 19     |        |    |
|                               |                    | 1995  | 9,884    | 7,776 | 13,933 | 9     | 495.29 | 389.69 | 698.22 | 11     |        |    |
|                               |                    | 1996  | 9,836    | 7,980 | 13,490 | 9     | 492.72 | 399.74 | 675.78 | 9      |        |    |
|                               |                    | 1997  | 9,856    | 8,473 | 13,113 | 9     | 487.82 | 419.38 | 649.02 | 9      |        |    |
|                               |                    | 1998  | 9,804    | 7,583 | 12,639 | 9     | 479.24 | 370.69 | 617.84 | 7      |        |    |
|                               |                    | 1999  | 8,921    | 7,113 | 9,935  | 9     | 432.39 | 344.75 | 481.57 | 6      |        |    |
|                               |                    | 2000  | 9,623    | 7,745 | 10,892 | 9     | 464.02 | 373.50 | 525.25 | 7      |        |    |
|                               |                    | 2001  | 9,522    | 9,038 | 10,484 | 9     | 460.50 | 437.11 | 507.05 | 6      |        |    |
|                               |                    | 2002  | 9,196    | 7,993 | 10,477 | 11    | 450.13 | 391.26 | 512.81 | 6      |        |    |
|                               |                    | 2003  | 8,554    | 6,981 | 10,381 | 11    | 421.78 | 344.24 | 511.86 | 7      |        |    |
|                               |                    | 2004  | 7,782    | 5,643 | 10,214 | 11    | 385.20 | 279.34 | 505.62 | 8      |        |    |
|                               |                    | 2005  | 7,188    | 4,322 | 10,007 | 13    | 355.45 | 213.71 | 494.83 | 11     |        |    |
|                               |                    | 2006  | 6,956    | 3,045 | 10,244 | 14    | 342.88 | 150.09 | 504.95 | 12     |        |    |
|                               |                    | 2007  | 6,775    | 1,863 | 11,663 | 14    | 332.40 | 91.42  | 572.23 | 13     |        |    |
|                               |                    |       | Hispanic | 1992  | 3,910  | 3,558 | 4,575  | 20     | 191.41 | 174.18 | 223.99 | 35 |
|                               |                    |       |          | 1993  | 4,232  | 3,244 | 6,299  | 18     | 198.68 | 152.32 | 295.76 | 32 |
|                               |                    |       |          | 1994  | 3,293  | 3,012 | 3,709  | 25     | 148.77 | 136.08 | 167.56 | 37 |
|                               |                    |       |          | 1995  | 3,664  | 2,883 | 5,165  | 20     | 159.61 | 125.58 | 225.00 | 34 |
| 1996                          | 3,514              |       |          | 2,851 | 4,820  | 21    | 146.84 | 119.13 | 201.39 | 35     |        |    |
| 1997                          | 3,468              |       |          | 2,982 | 4,615  | 21    | 137.49 | 118.20 | 182.92 | 36     |        |    |
| 1998                          | 3,459              |       |          | 2,676 | 4,460  | 21    | 129.78 | 100.38 | 167.31 | 36     |        |    |
| 1999                          | 3,203              |       |          | 2,553 | 3,567  | 22    | 114.58 | 91.36  | 127.61 | 36     |        |    |
| 2000                          | 3,555              |       |          | 2,861 | 4,024  | 19    | 121.31 | 97.64  | 137.31 | 35     |        |    |
| 2001                          | 3,650              |       |          | 3,464 | 4,019  | 18    | 119.01 | 112.97 | 131.04 | 34     |        |    |
| 2002                          | 3,677              |       |          | 3,196 | 4,189  | 18    | 116.34 | 101.13 | 132.54 | 33     |        |    |
| 2003                          | 3,578              |       |          | 2,920 | 4,342  | 19    | 110.75 | 90.39  | 134.41 | 34     |        |    |
| 2004                          | 3,405              |       |          | 2,470 | 4,470  | 20    | 103.19 | 74.83  | 135.46 | 39     |        |    |
| 2005                          | 3,284              |       |          | 1,975 | 4,572  | 21    | 97.14  | 58.41  | 135.23 | 40     |        |    |
| 2006                          | 3,302              | 1,445 | 4,863    | 22    | 95.30  | 41.72 | 140.34 | 41     |        |        |        |    |
| 2007                          | 3,316              | 912   | 5,709    | 24    | 92.95  | 25.56 | 160.02 | 41     |        |        |        |    |

| Metropolitan Statistical Area | PWID Population | Year   | Number | Min    | Max    | Rank   | Rate   | Min    | Max    | Rank   |    |
|-------------------------------|-----------------|--------|--------|--------|--------|--------|--------|--------|--------|--------|----|
| Oakland, CA                   | Male            | 1992   | 13,973 | 12,716 | 16,352 | 21     | 190.85 | 173.67 | 223.33 | 35     |    |
|                               |                 | 1993   | 16,660 | 12,773 | 24,800 | 12     | 227.15 | 174.16 | 338.14 | 23     |    |
|                               |                 | 1994   | 13,842 | 12,661 | 15,591 | 19     | 188.64 | 172.55 | 212.47 | 32     |    |
|                               |                 | 1995   | 15,996 | 12,586 | 22,550 | 14     | 217.40 | 171.04 | 306.47 | 21     |    |
|                               |                 | 1996   | 15,572 | 12,634 | 21,358 | 14     | 209.85 | 170.25 | 287.82 | 21     |    |
|                               |                 | 1997   | 15,303 | 13,156 | 20,360 | 14     | 202.01 | 173.67 | 268.77 | 23     |    |
|                               |                 | 1998   | 14,978 | 11,585 | 19,310 | 14     | 192.76 | 149.10 | 248.51 | 25     |    |
|                               |                 | 1999   | 13,468 | 10,738 | 15,000 | 15     | 169.68 | 135.29 | 188.99 | 34     |    |
|                               |                 | 2000   | 14,430 | 11,615 | 16,334 | 14     | 177.83 | 143.14 | 201.29 | 28     |    |
|                               |                 | 2001   | 14,272 | 13,547 | 15,714 | 15     | 172.35 | 163.59 | 189.77 | 29     |    |
|                               |                 | 2002   | 13,875 | 12,061 | 15,807 | 16     | 167.14 | 145.28 | 190.42 | 26     |    |
|                               |                 | 2003   | 13,100 | 10,692 | 15,898 | 18     | 157.76 | 128.76 | 191.45 | 31     |    |
|                               |                 | 2004   | 12,208 | 8,853  | 16,025 | 18     | 146.82 | 106.47 | 192.73 | 37     |    |
|                               |                 | 2005   | 11,670 | 7,016  | 16,246 | 19     | 139.70 | 83.99  | 194.48 | 37     |    |
|                               |                 | 2006   | 11,813 | 5,171  | 17,396 | 19     | 140.65 | 61.57  | 207.14 | 34     |    |
|                               | 2007            | 12,166 | 3,346  | 20,943 | 19     | 143.32 | 39.42  | 246.72 | 33     |        |    |
|                               |                 | Female | 1992   | 9,406  | 8,559  | 11,007 | 13     | 128.62 | 117.04 | 150.51 | 20 |
|                               |                 |        | 1993   | 10,774 | 8,261  | 16,039 | 9      | 146.63 | 112.42 | 218.28 | 13 |
|                               |                 |        | 1994   | 8,704  | 7,961  | 9,803  | 15     | 118.18 | 108.10 | 133.11 | 19 |
|                               |                 |        | 1995   | 9,876  | 7,771  | 13,923 | 11     | 133.40 | 104.96 | 188.05 | 13 |
|                               |                 |        | 1996   | 9,519  | 7,722  | 13,055 | 12     | 127.22 | 103.21 | 174.49 | 14 |
|                               |                 |        | 1997   | 9,320  | 8,013  | 12,400 | 14     | 121.21 | 104.20 | 161.26 | 14 |
|                               |                 |        | 1998   | 9,130  | 7,062  | 11,771 | 14     | 115.49 | 89.33  | 148.89 | 13 |
|                               |                 |        | 1999   | 8,240  | 6,570  | 9,178  | 15     | 102.02 | 81.34  | 113.62 | 23 |
|                               |                 |        | 2000   | 8,871  | 7,140  | 10,042 | 16     | 107.64 | 86.64  | 121.84 | 16 |
|                               | 2001            |        | 8,809  | 8,361  | 9,699  | 13     | 104.95 | 99.62  | 115.56 | 22     |    |
|                               | 2002            | 8,577  | 7,455  | 9,771  | 15     | 102.03 | 88.69  | 116.24 | 19     |        |    |
|                               | 2003            | 8,075  | 6,590  | 9,799  | 16     | 96.03  | 78.38  | 116.54 | 23     |        |    |
|                               | 2004            | 7,458  | 5,409  | 9,790  | 17     | 88.75  | 64.36  | 116.50 | 25     |        |    |
|                               | 2005            | 7,011  | 4,215  | 9,760  | 20     | 83.26  | 50.06  | 115.91 | 28     |        |    |
|                               | 2006            | 6,913  | 3,026  | 10,180 | 20     | 81.73  | 35.78  | 120.36 | 33     |        |    |
|                               | 2007            | 6,856  | 1,885  | 11,802 | 20     | 80.41  | 22.12  | 138.43 | 32     |        |    |

| Metropolitan Statistical Area | PWID Population | Year  | Number      | Min    | Max    | Rank   | Rate   | Min    | Max    | Rank   |        |    |
|-------------------------------|-----------------|-------|-------------|--------|--------|--------|--------|--------|--------|--------|--------|----|
| Oakland, CA                   | Young (15-29)   | 1992  | 4,206       | 3,828  | 4,922  | 28     | 89.29  | 81.25  | 104.48 | 51     |        |    |
|                               |                 | 1993  | 4,810       | 3,688  | 7,161  | 23     | 104.24 | 79.92  | 155.18 | 38     |        |    |
|                               |                 | 1994  | 3,842       | 3,514  | 4,327  | 27     | 84.84  | 77.60  | 95.55  | 52     |        |    |
|                               |                 | 1995  | 4,280       | 3,368  | 6,034  | 23     | 95.43  | 75.08  | 134.52 | 45     |        |    |
|                               |                 | 1996  | 4,031       | 3,270  | 5,528  | 23     | 89.91  | 72.95  | 123.32 | 48     |        |    |
|                               |                 | 1997  | 3,849       | 3,309  | 5,121  | 24     | 84.67  | 72.79  | 112.65 | 52     |        |    |
|                               |                 | 1998  | 3,680       | 2,847  | 4,744  | 28     | 79.24  | 61.29  | 102.16 | 56     |        |    |
|                               |                 | 1999  | 3,254       | 2,594  | 3,624  | 33     | 68.77  | 54.83  | 76.59  | 64     |        |    |
|                               |                 | 2000  | 3,455       | 2,781  | 3,911  | 34     | 71.52  | 57.57  | 80.95  | 63     |        |    |
|                               |                 | 2001  | 3,415       | 3,242  | 3,760  | 35     | 69.85  | 66.31  | 76.92  | 68     |        |    |
|                               |                 | 2002  | 3,352       | 2,914  | 3,819  | 36     | 69.39  | 60.32  | 79.06  | 69     |        |    |
|                               |                 | 2003  | 3,230       | 2,636  | 3,919  | 40     | 67.66  | 55.22  | 82.11  | 75     |        |    |
|                               |                 | 2004  | 3,108       | 2,254  | 4,080  | 42     | 65.51  | 47.51  | 85.99  | 78     |        |    |
|                               |                 | 2005  | 3,107       | 1,868  | 4,326  | 43     | 65.24  | 39.23  | 90.83  | 79     |        |    |
|                               |                 | 2006  | 3,333       | 1,459  | 4,909  | 40     | 69.43  | 30.39  | 102.25 | 77     |        |    |
|                               |                 | 2007  | 3,687       | 1,014  | 6,348  | 38     | 75.39  | 20.73  | 129.79 | 67     |        |    |
|                               |                 |       | Old (30-64) | 1992   | 19,452 | 17,701 | 22,763 | 12     | 196.01 | 178.37 | 229.38 | 21 |
|                               |                 |       |             | 1993   | 22,862 | 17,529 | 34,034 | 11     | 227.09 | 174.11 | 338.05 | 13 |
|                               |                 |       |             | 1994   | 18,858 | 17,249 | 21,240 | 14     | 185.37 | 169.55 | 208.78 | 20 |
|                               |                 |       |             | 1995   | 21,751 | 17,113 | 30,663 | 11     | 211.66 | 166.53 | 298.38 | 11 |
| 1996                          | 21,215          |       |             | 17,212 | 29,097 | 12     | 203.61 | 165.18 | 279.25 | 9      |        |    |
| 1997                          | 20,938          |       |             | 18,001 | 27,857 | 13     | 195.33 | 167.93 | 259.89 | 11     |        |    |
| 1998                          | 20,602          |       |             | 15,936 | 26,561 | 13     | 186.75 | 144.45 | 240.76 | 13     |        |    |
| 1999                          | 18,620          |       |             | 14,846 | 20,739 | 13     | 165.05 | 131.59 | 183.82 | 20     |        |    |
| 2000                          | 20,029          |       |             | 16,122 | 22,672 | 12     | 173.78 | 139.87 | 196.70 | 13     |        |    |
| 2001                          | 19,840          |       |             | 18,832 | 21,846 | 13     | 168.35 | 159.80 | 185.37 | 13     |        |    |
| 2002                          | 19,253          |       |             | 16,736 | 21,935 | 12     | 162.11 | 140.91 | 184.68 | 14     |        |    |
| 2003                          | 18,060          |       |             | 14,740 | 21,917 | 15     | 151.27 | 123.46 | 183.58 | 17     |        |    |
| 2004                          | 16,618          |       |             | 12,051 | 21,813 | 17     | 138.79 | 100.65 | 182.18 | 18     |        |    |
| 2005                          | 15,559          |       |             | 9,355  | 21,660 | 17     | 129.53 | 77.88  | 180.33 | 20     |        |    |
| 2006                          | 15,260          | 6,680 | 22,473      | 17     | 126.59 | 55.41  | 186.42 | 18     |        |        |        |    |
| 2007                          | 15,005          | 4,127 | 25,832      | 15     | 123.77 | 34.04  | 213.08 | 16     |        |        |        |    |

| Metropolitan Statistical Area | PWID Population | Year  | Number             | Min   | Max    | Rank  | Rate   | Min   | Max    | Rank  |        |    |
|-------------------------------|-----------------|-------|--------------------|-------|--------|-------|--------|-------|--------|-------|--------|----|
| Oklahoma City, OK             | Total           | 1992  | 6,950              | 5,714 | 8,073  | 61    | 106.19 | 87.31 | 123.35 | 50    |        |    |
|                               |                 | 1993  | 7,146              | 5,943 | 8,699  | 59    | 107.29 | 89.22 | 130.61 | 48    |        |    |
|                               |                 | 1994  | 6,298              | 6,172 | 6,522  | 67    | 93.17  | 91.30 | 96.48  | 57    |        |    |
|                               |                 | 1995  | 6,433              | 5,263 | 7,866  | 65    | 94.14  | 77.02 | 115.13 | 52    |        |    |
|                               |                 | 1996  | 6,180              | 4,634 | 7,483  | 65    | 89.05  | 66.78 | 107.83 | 56    |        |    |
|                               |                 | 1997  | 5,972              | 4,184 | 7,090  | 66    | 84.79  | 59.40 | 100.65 | 59    |        |    |
|                               |                 | 1998  | 5,787              | 3,872 | 7,155  | 67    | 81.15  | 54.30 | 100.35 | 60    |        |    |
|                               |                 | 1999  | 5,467              | 3,715 | 7,449  | 74    | 75.35  | 51.21 | 102.66 | 65    |        |    |
|                               |                 | 2000  | 5,638              | 3,806 | 7,795  | 68    | 76.84  | 51.87 | 106.23 | 65    |        |    |
|                               |                 | 2001  | 5,699              | 4,176 | 8,149  | 75    | 76.79  | 56.27 | 109.80 | 64    |        |    |
|                               |                 | 2002  | 5,865              | 4,553 | 8,738  | 69    | 78.13  | 60.66 | 116.42 | 64    |        |    |
|                               |                 | 2003  | 6,017              | 4,339 | 9,327  | 69    | 79.38  | 57.24 | 123.04 | 61    |        |    |
|                               |                 | 2004  | 6,110              | 4,123 | 9,914  | 70    | 80.05  | 54.02 | 129.89 | 59    |        |    |
|                               |                 | 2005  | 6,113              | 3,932 | 10,550 | 69    | 79.24  | 50.97 | 136.75 | 60    |        |    |
|                               |                 | 2006  | 6,128              | 3,760 | 11,241 | 71    | 78.34  | 48.07 | 143.71 | 61    |        |    |
|                               |                 | 2007  | 6,114              | 3,575 | 11,920 | 72    | 77.29  | 45.19 | 150.68 | 61    |        |    |
|                               |                 |       | Non-Hispanic White | 1992  | 5,532  | 4,548 | 6,426  | 44    | 106.42 | 87.50 | 123.61 | 36 |
|                               |                 |       |                    | 1993  | 5,710  | 4,749 | 6,951  | 38    | 108.49 | 90.22 | 132.07 | 33 |
|                               |                 |       |                    | 1994  | 5,040  | 4,939 | 5,219  | 45    | 94.86  | 92.96 | 98.24  | 42 |
|                               |                 |       |                    | 1995  | 5,145  | 4,209 | 6,292  | 39    | 96.29  | 78.78 | 117.75 | 35 |
| 1996                          | 4,930           |       |                    | 3,697 | 5,970  | 39    | 91.43  | 68.56 | 110.71 | 42    |        |    |
| 1997                          | 4,743           |       |                    | 3,323 | 5,631  | 43    | 87.32  | 61.17 | 103.65 | 45    |        |    |
| 1998                          | 4,567           |       |                    | 3,056 | 5,647  | 42    | 83.72  | 56.02 | 103.52 | 46    |        |    |
| 1999                          | 4,280           |       |                    | 2,909 | 5,831  | 49    | 77.85  | 52.90 | 106.06 | 54    |        |    |
| 2000                          | 4,370           |       |                    | 2,950 | 6,042  | 45    | 79.15  | 53.43 | 109.43 | 47    |        |    |
| 2001                          | 4,364           |       |                    | 3,198 | 6,241  | 51    | 78.79  | 57.74 | 112.66 | 53    |        |    |
| 2002                          | 4,428           |       |                    | 3,438 | 6,599  | 44    | 79.56  | 61.77 | 118.54 | 46    |        |    |
| 2003                          | 4,471           |       |                    | 3,224 | 6,930  | 44    | 79.97  | 57.67 | 123.96 | 45    |        |    |
| 2004                          | 4,457           |       |                    | 3,008 | 7,232  | 45    | 79.56  | 53.69 | 129.10 | 46    |        |    |
| 2005                          | 4,369           |       |                    | 2,810 | 7,540  | 53    | 77.60  | 49.91 | 133.90 | 48    |        |    |
| 2006                          | 4,281           | 2,627 | 7,854              | 56    | 75.39  | 46.27 | 138.31 | 53    |        |       |        |    |
| 2007                          | 4,166           | 2,436 | 8,123              | 58    | 73.07  | 42.73 | 142.46 | 55    |        |       |        |    |

| Metropolitan Statistical Area | PWID Population    | Year | Number   | Min  | Max   | Rank  | Rate   | Min   | Max    | Rank  |       |    |
|-------------------------------|--------------------|------|----------|------|-------|-------|--------|-------|--------|-------|-------|----|
| Oklahoma City, OK             | Non-Hispanic Black | 1992 | 669      | 550  | 778   | 87    | 100.44 | 82.58 | 116.67 | 96    |       |    |
|                               |                    | 1993 | 638      | 531  | 777   | 87    | 93.79  | 78.00 | 114.18 | 95    |       |    |
|                               |                    | 1994 | 525      | 515  | 544   | 89    | 75.59  | 74.07 | 78.28  | 99    |       |    |
|                               |                    | 1995 | 505      | 414  | 618   | 89    | 71.80  | 58.74 | 87.80  | 99    |       |    |
|                               |                    | 1996 | 461      | 346  | 558   | 89    | 64.28  | 48.20 | 77.84  | 99    |       |    |
|                               |                    | 1997 | 427      | 299  | 507   | 89    | 58.24  | 40.80 | 69.13  | 99    |       |    |
|                               |                    | 1998 | 401      | 268  | 496   | 91    | 53.44  | 35.75 | 66.07  | 99    |       |    |
|                               |                    | 1999 | 371      | 252  | 505   | 92    | 48.17  | 32.73 | 65.63  | 99    |       |    |
|                               |                    | 2000 | 378      | 255  | 523   | 91    | 48.15  | 32.51 | 66.57  | 99    |       |    |
|                               |                    | 2001 | 383      | 281  | 548   | 92    | 47.54  | 34.84 | 67.98  | 99    |       |    |
|                               |                    | 2002 | 399      | 310  | 595   | 87    | 48.77  | 37.87 | 72.67  | 96    |       |    |
|                               |                    | 2003 | 421      | 303  | 652   | 86    | 50.79  | 36.63 | 78.73  | 94    |       |    |
|                               |                    | 2004 | 444      | 300  | 721   | 86    | 53.49  | 36.09 | 86.80  | 94    |       |    |
|                               |                    | 2005 | 469      | 302  | 810   | 86    | 55.44  | 35.66 | 95.67  | 93    |       |    |
|                               |                    | 2006 | 504      | 309  | 925   | 84    | 58.41  | 35.84 | 107.15 | 92    |       |    |
|                               |                    | 2007 | 549      | 321  | 1,070 | 81    | 61.87  | 36.18 | 120.63 | 89    |       |    |
|                               |                    |      | Hispanic | 1992 | 130   | 107   | 151    | 73    | 52.66  | 43.29 | 61.17 | 85 |
|                               |                    |      |          | 1993 | 145   | 120   | 176    | 72    | 54.18  | 45.06 | 65.96 | 79 |
|                               |                    |      |          | 1994 | 132   | 129   | 137    | 73    | 45.78  | 44.87 | 47.41 | 85 |
|                               |                    |      |          | 1995 | 135   | 111   | 166    | 72    | 43.58  | 35.66 | 53.29 | 82 |
| 1996                          | 127                |      |          | 96   | 154   | 74    | 37.62  | 28.21 | 45.55  | 85    |       |    |
| 1997                          | 118                |      |          | 83   | 141   | 75    | 31.98  | 22.40 | 37.96  | 87    |       |    |
| 1998                          | 109                |      |          | 73   | 135   | 76    | 27.05  | 18.10 | 33.45  | 91    |       |    |
| 1999                          | 98                 |      |          | 67   | 134   | 80    | 22.12  | 15.03 | 30.14  | 91    |       |    |
| 2000                          | 97                 |      |          | 65   | 134   | 79    | 20.42  | 13.78 | 28.23  | 91    |       |    |
| 2001                          | 95                 |      |          | 70   | 136   | 82    | 18.73  | 13.73 | 26.78  | 93    |       |    |
| 2002                          | 97                 |      |          | 75   | 144   | 80    | 18.03  | 13.99 | 26.86  | 92    |       |    |
| 2003                          | 101                |      |          | 73   | 157   | 80    | 18.03  | 13.00 | 27.94  | 93    |       |    |
| 2004                          | 109                |      |          | 74   | 177   | 80    | 18.53  | 12.50 | 30.06  | 93    |       |    |
| 2005                          | 122                |      |          | 78   | 210   | 80    | 19.61  | 12.61 | 33.83  | 93    |       |    |
| 2006                          | 143                |      |          | 88   | 263   | 78    | 21.97  | 13.48 | 40.31  | 89    |       |    |
| 2007                          | 179                | 105  | 349      | 76   | 26.20 | 15.32 | 51.08  | 84    |        |       |       |    |

| Metropolitan Statistical Area | PWID Population | Year   | Number | Min   | Max   | Rank  | Rate   | Min    | Max    | Rank  |    |
|-------------------------------|-----------------|--------|--------|-------|-------|-------|--------|--------|--------|-------|----|
| Oklahoma City, OK             | Male            | 1992   | 4,581  | 3,767 | 5,321 | 60    | 141.48 | 116.32 | 164.33 | 49    |    |
|                               |                 | 1993   | 4,635  | 3,854 | 5,642 | 56    | 140.41 | 116.76 | 170.92 | 47    |    |
|                               |                 | 1994   | 4,026  | 3,945 | 4,169 | 69    | 120.12 | 117.71 | 124.39 | 58    |    |
|                               |                 | 1995   | 4,058  | 3,320 | 4,963 | 66    | 119.71 | 97.95  | 146.40 | 54    |    |
|                               |                 | 1996   | 3,852  | 2,888 | 4,664 | 66    | 111.82 | 83.84  | 135.39 | 59    |    |
|                               |                 | 1997   | 3,681  | 2,579 | 4,370 | 67    | 105.28 | 73.75  | 124.98 | 59    |    |
|                               |                 | 1998   | 3,528  | 2,361 | 4,362 | 71    | 99.67  | 66.69  | 123.24 | 63    |    |
|                               |                 | 1999   | 3,297  | 2,240 | 4,492 | 79    | 91.47  | 62.16  | 124.63 | 73    |    |
|                               |                 | 2000   | 3,361  | 2,269 | 4,648 | 73    | 92.24  | 62.27  | 127.53 | 67    |    |
|                               |                 | 2001   | 3,356  | 2,459 | 4,799 | 79    | 90.86  | 66.59  | 129.92 | 68    |    |
|                               |                 | 2002   | 3,406  | 2,644 | 5,075 | 72    | 91.10  | 70.73  | 135.74 | 67    |    |
|                               |                 | 2003   | 3,440  | 2,480 | 5,332 | 73    | 91.29  | 65.83  | 141.51 | 66    |    |
|                               |                 | 2004   | 3,428  | 2,313 | 5,563 | 73    | 90.15  | 60.83  | 146.28 | 66    |    |
|                               |                 | 2005   | 3,356  | 2,159 | 5,792 | 74    | 87.38  | 56.20  | 150.78 | 66    |    |
|                               |                 | 2006   | 3,278  | 2,012 | 6,014 | 76    | 84.19  | 51.67  | 154.46 | 68    |    |
|                               | 2007            | 3,171  | 1,854  | 6,183 | 78    | 80.40 | 47.01  | 156.74 | 71     |       |    |
|                               |                 | Female | 1992   | 2,442 | 2,008 | 2,837 | 62     | 73.85  | 60.72  | 85.78 | 46 |
|                               |                 |        | 1993   | 2,585 | 2,150 | 3,147 | 55     | 76.95  | 63.99  | 93.68 | 41 |
|                               |                 |        | 1994   | 2,340 | 2,293 | 2,423 | 65     | 68.65  | 67.28  | 71.10 | 55 |
|                               |                 |        | 1995   | 2,449 | 2,004 | 2,995 | 57     | 71.14  | 58.20  | 87.00 | 48 |
|                               |                 |        | 1996   | 2,407 | 1,805 | 2,914 | 60     | 68.88  | 51.64  | 83.40 | 54 |
|                               |                 |        | 1997   | 2,375 | 1,664 | 2,819 | 61     | 66.95  | 46.90  | 79.48 | 54 |
|                               |                 |        | 1998   | 2,347 | 1,570 | 2,901 | 62     | 65.35  | 43.73  | 80.80 | 55 |
|                               |                 |        | 1999   | 2,258 | 1,534 | 3,076 | 67     | 61.85  | 42.03  | 84.26 | 59 |
|                               |                 |        | 2000   | 2,370 | 1,600 | 3,276 | 62     | 64.16  | 43.31  | 88.70 | 56 |
|                               | 2001            |        | 2,435  | 1,785 | 3,483 | 63    | 65.33  | 47.88  | 93.42  | 56    |    |
|                               | 2002            | 2,547  | 1,978  | 3,796 | 58    | 67.62 | 52.50  | 100.76 | 53     |       |    |
|                               | 2003            | 2,656  | 1,915  | 4,116 | 57    | 69.65 | 50.23  | 107.96 | 48     |       |    |
|                               | 2004            | 2,740  | 1,849  | 4,446 | 55    | 71.55 | 48.28  | 116.10 | 45     |       |    |
|                               | 2005            | 2,786  | 1,792  | 4,807 | 56    | 71.93 | 46.26  | 124.12 | 43     |       |    |
|                               | 2006            | 2,839  | 1,742  | 5,207 | 53    | 72.26 | 44.34  | 132.56 | 41     |       |    |
|                               | 2007            | 2,881  | 1,684  | 5,616 | 53    | 72.63 | 42.47  | 141.60 | 42     |       |    |

| Metropolitan Statistical Area | PWID Population | Year        | Number | Min   | Max   | Rank  | Rate   | Min    | Max    | Rank   |    |
|-------------------------------|-----------------|-------------|--------|-------|-------|-------|--------|--------|--------|--------|----|
| Oklahoma City, OK             | Young (15-29)   | 1992        | 2,338  | 1,922 | 2,715 | 49    | 102.28 | 84.09  | 118.81 | 39     |    |
|                               |                 | 1993        | 2,458  | 2,044 | 2,992 | 42    | 106.74 | 88.76  | 129.94 | 34     |    |
|                               |                 | 1994        | 2,211  | 2,166 | 2,289 | 48    | 95.36  | 93.44  | 98.75  | 40     |    |
|                               |                 | 1995        | 2,298  | 1,880 | 2,811 | 44    | 98.09  | 80.25  | 119.95 | 44     |    |
|                               |                 | 1996        | 2,242  | 1,681 | 2,715 | 46    | 94.06  | 70.53  | 113.89 | 45     |    |
|                               |                 | 1997        | 2,195  | 1,537 | 2,605 | 51    | 90.28  | 63.24  | 107.17 | 46     |    |
|                               |                 | 1998        | 2,148  | 1,437 | 2,656 | 54    | 86.91  | 58.15  | 107.46 | 52     |    |
|                               |                 | 1999        | 2,045  | 1,390 | 2,786 | 59    | 81.42  | 55.33  | 110.93 | 55     |    |
|                               |                 | 2000        | 2,120  | 1,431 | 2,931 | 57    | 83.99  | 56.70  | 116.13 | 55     |    |
|                               |                 | 2001        | 2,147  | 1,574 | 3,070 | 62    | 84.33  | 61.80  | 120.59 | 62     |    |
|                               |                 | 2002        | 2,208  | 1,714 | 3,290 | 57    | 85.96  | 66.74  | 128.09 | 55     |    |
|                               |                 | 2003        | 2,257  | 1,628 | 3,499 | 61    | 87.22  | 62.90  | 135.20 | 59     |    |
|                               |                 | 2004        | 2,277  | 1,536 | 3,695 | 64    | 87.59  | 59.11  | 142.13 | 57     |    |
|                               |                 | 2005        | 2,256  | 1,451 | 3,894 | 64    | 86.06  | 55.35  | 148.50 | 57     |    |
|                               |                 | 2006        | 2,233  | 1,370 | 4,096 | 66    | 83.93  | 51.50  | 153.97 | 61     |    |
|                               | 2007            | 2,192       | 1,282  | 4,273 | 66    | 81.74 | 47.79  | 159.36 | 60     |        |    |
|                               |                 | Old (30-64) | 1992   | 4,725 | 3,885 | 5,488 | 65     | 110.92 | 91.20  | 128.85 | 53 |
|                               |                 |             | 1993   | 4,760 | 3,958 | 5,794 | 62     | 109.23 | 90.84  | 132.97 | 48 |
|                               |                 |             | 1994   | 4,137 | 4,055 | 4,285 | 73     | 93.15  | 91.28  | 96.47  | 68 |
|                               |                 |             | 1995   | 4,193 | 3,430 | 5,127 | 69     | 93.38  | 76.40  | 114.20 | 62 |
|                               |                 |             | 1996   | 4,015 | 3,010 | 4,861 | 72     | 88.12  | 66.08  | 106.70 | 64 |
|                               |                 |             | 1997   | 3,879 | 2,717 | 4,605 | 75     | 84.09  | 58.91  | 99.82  | 65 |
|                               |                 |             | 1998   | 3,764 | 2,518 | 4,654 | 74     | 80.79  | 54.06  | 99.89  | 64 |
|                               |                 |             | 1999   | 3,561 | 2,420 | 4,852 | 77     | 75.07  | 51.02  | 102.28 | 75 |
|                               |                 |             | 2000   | 3,673 | 2,479 | 5,078 | 75     | 76.29  | 51.50  | 105.48 | 62 |
|                               | 2001            |             | 3,702  | 2,713 | 5,294 | 77    | 75.94  | 55.65  | 108.59 | 67     |    |
|                               | 2002            | 3,784       | 2,938  | 5,639 | 72    | 76.64 | 59.51  | 114.20 | 59     |        |    |
|                               | 2003            | 3,834       | 2,765  | 5,944 | 72    | 76.81 | 55.39  | 119.05 | 57     |        |    |
|                               | 2004            | 3,816       | 2,575  | 6,192 | 71    | 75.83 | 51.17  | 123.04 | 58     |        |    |
|                               | 2005            | 3,706       | 2,384  | 6,395 | 71    | 72.77 | 46.81  | 125.57 | 60     |        |    |
|                               | 2006            | 3,558       | 2,183  | 6,527 | 73    | 68.92 | 42.30  | 126.44 | 61     |        |    |
|                               | 2007            | 3,341       | 1,954  | 6,515 | 73    | 63.90 | 37.36  | 124.58 | 63     |        |    |



| Metropolitan Statistical Area | PWID Population | Year  | Number             | Min   | Max   | Rank  | Rate   | Min   | Max    | Rank  |       |    |
|-------------------------------|-----------------|-------|--------------------|-------|-------|-------|--------|-------|--------|-------|-------|----|
| Omaha, NE--IA                 | Total           | 1992  | 2,491              | 1,703 | 3,358 | 96    | 57.62  | 39.39 | 77.66  | 91    |       |    |
|                               |                 | 1993  | 2,502              | 1,672 | 3,331 | 92    | 57.56  | 38.46 | 76.63  | 84    |       |    |
|                               |                 | 1994  | 2,453              | 1,648 | 3,335 | 95    | 55.83  | 37.51 | 75.91  | 91    |       |    |
|                               |                 | 1995  | 2,468              | 1,635 | 3,362 | 91    | 55.20  | 36.56 | 75.18  | 86    |       |    |
|                               |                 | 1996  | 2,477              | 1,623 | 3,430 | 91    | 54.24  | 35.54 | 75.10  | 85    |       |    |
|                               |                 | 1997  | 2,469              | 1,600 | 3,476 | 91    | 53.30  | 34.53 | 75.02  | 85    |       |    |
|                               |                 | 1998  | 2,483              | 1,627 | 3,573 | 91    | 53.00  | 34.72 | 76.25  | 86    |       |    |
|                               |                 | 1999  | 2,565              | 1,656 | 3,674 | 92    | 54.10  | 34.92 | 77.48  | 91    |       |    |
|                               |                 | 2000  | 2,579              | 1,791 | 3,939 | 91    | 53.74  | 37.31 | 82.08  | 84    |       |    |
|                               |                 | 2001  | 2,823              | 1,925 | 4,202 | 90    | 58.24  | 39.71 | 86.69  | 83    |       |    |
|                               |                 | 2002  | 2,752              | 2,059 | 4,542 | 91    | 56.18  | 42.03 | 92.71  | 82    |       |    |
|                               |                 | 2003  | 2,851              | 2,002 | 4,889 | 91    | 57.57  | 40.42 | 98.73  | 80    |       |    |
|                               |                 | 2004  | 2,943              | 1,930 | 5,249 | 91    | 58.64  | 38.45 | 104.58 | 78    |       |    |
|                               |                 | 2005  | 3,038              | 1,848 | 5,623 | 91    | 59.66  | 36.29 | 110.43 | 79    |       |    |
|                               |                 | 2006  | 3,123              | 1,759 | 5,987 | 91    | 60.61  | 34.13 | 116.21 | 77    |       |    |
|                               |                 | 2007  | 3,200              | 1,650 | 6,348 | 92    | 61.49  | 31.71 | 121.99 | 74    |       |    |
|                               |                 |       | Non-Hispanic White | 1992  | 1,671 | 1,143 | 2,252  | 91    | 43.99  | 30.08 | 59.29 | 83 |
|                               |                 |       |                    | 1993  | 1,722 | 1,150 | 2,292  | 85    | 45.30  | 30.27 | 60.30 | 75 |
|                               |                 |       |                    | 1994  | 1,720 | 1,155 | 2,338  | 87    | 45.02  | 30.25 | 61.22 | 80 |
|                               |                 |       |                    | 1995  | 1,754 | 1,161 | 2,389  | 85    | 45.39  | 30.06 | 61.82 | 74 |
| 1996                          | 1,776           |       |                    | 1,164 | 2,460 | 86    | 45.30  | 29.68 | 62.73  | 74    |       |    |
| 1997                          | 1,782           |       |                    | 1,154 | 2,508 | 86    | 45.03  | 29.17 | 63.39  | 74    |       |    |
| 1998                          | 1,799           |       |                    | 1,178 | 2,588 | 86    | 45.16  | 29.58 | 64.97  | 75    |       |    |
| 1999                          | 1,861           |       |                    | 1,201 | 2,665 | 85    | 46.44  | 29.97 | 66.51  | 74    |       |    |
| 2000                          | 1,872           |       |                    | 1,300 | 2,859 | 85    | 46.42  | 32.23 | 70.90  | 75    |       |    |
| 2001                          | 2,047           |       |                    | 1,396 | 3,048 | 84    | 50.53  | 34.45 | 75.21  | 72    |       |    |
| 2002                          | 1,994           |       |                    | 1,492 | 3,291 | 85    | 48.92  | 36.60 | 80.73  | 75    |       |    |
| 2003                          | 2,064           |       |                    | 1,449 | 3,539 | 86    | 50.29  | 35.31 | 86.24  | 74    |       |    |
| 2004                          | 2,130           |       |                    | 1,397 | 3,799 | 83    | 51.37  | 33.68 | 91.61  | 71    |       |    |
| 2005                          | 2,200           |       |                    | 1,338 | 4,072 | 83    | 52.46  | 31.91 | 97.10  | 72    |       |    |
| 2006                          | 2,265           |       |                    | 1,276 | 4,344 | 82    | 53.59  | 30.18 | 102.75 | 74    |       |    |
| 2007                          | 2,330           | 1,202 | 4,623              | 83    | 54.74 | 28.23 | 108.61 | 75    |        |       |       |    |

| Metropolitan Statistical Area | PWID Population    | Year | Number   | Min  | Max   | Rank  | Rate   | Min    | Max    | Rank  |       |    |
|-------------------------------|--------------------|------|----------|------|-------|-------|--------|--------|--------|-------|-------|----|
| Omaha, NE--IA                 | Non-Hispanic Black | 1992 | 599      | 410  | 808   | 89    | 184.14 | 125.89 | 248.19 | 81    |       |    |
|                               |                    | 1993 | 551      | 368  | 734   | 89    | 167.72 | 112.06 | 223.26 | 80    |       |    |
|                               |                    | 1994 | 494      | 332  | 671   | 91    | 146.17 | 98.21  | 198.75 | 86    |       |    |
|                               |                    | 1995 | 454      | 300  | 618   | 91    | 131.10 | 86.83  | 178.57 | 86    |       |    |
|                               |                    | 1996 | 416      | 272  | 576   | 91    | 116.64 | 76.43  | 161.51 | 88    |       |    |
|                               |                    | 1997 | 379      | 246  | 534   | 93    | 103.49 | 67.04  | 145.67 | 89    |       |    |
|                               |                    | 1998 | 350      | 229  | 504   | 93    | 93.80  | 61.45  | 134.95 | 88    |       |    |
|                               |                    | 1999 | 334      | 215  | 478   | 93    | 87.75  | 56.64  | 125.67 | 91    |       |    |
|                               |                    | 2000 | 311      | 216  | 475   | 94    | 80.23  | 55.71  | 122.54 | 91    |       |    |
|                               |                    | 2001 | 319      | 217  | 474   | 93    | 80.82  | 55.11  | 120.30 | 91    |       |    |
|                               |                    | 2002 | 293      | 220  | 484   | 94    | 73.80  | 55.21  | 121.79 | 91    |       |    |
|                               |                    | 2003 | 290      | 204  | 498   | 94    | 72.17  | 50.67  | 123.77 | 88    |       |    |
|                               |                    | 2004 | 290      | 190  | 517   | 94    | 70.93  | 46.51  | 126.50 | 88    |       |    |
|                               |                    | 2005 | 294      | 179  | 544   | 94    | 70.92  | 43.14  | 131.27 | 87    |       |    |
|                               |                    | 2006 | 302      | 170  | 580   | 93    | 71.91  | 40.50  | 137.87 | 86    |       |    |
|                               |                    | 2007 | 316      | 163  | 628   | 94    | 74.49  | 38.41  | 147.78 | 84    |       |    |
|                               |                    |      | Hispanic | 1992 | 72    | 49    | 97     | 80     | 57.18  | 39.09 | 77.06 | 81 |
|                               |                    |      |          | 1993 | 72    | 48    | 95     | 80     | 51.52  | 34.42 | 68.58 | 80 |
|                               |                    |      |          | 1994 | 71    | 48    | 96     | 83     | 46.18  | 31.03 | 62.79 | 84 |
|                               |                    |      |          | 1995 | 74    | 49    | 100    | 80     | 43.03  | 28.50 | 58.60 | 83 |
| 1996                          | 77                 |      |          | 51   | 107   | 80    | 40.63  | 26.62  | 56.26  | 82    |       |    |
| 1997                          | 81                 |      |          | 53   | 114   | 80    | 39.41  | 25.52  | 55.46  | 80    |       |    |
| 1998                          | 87                 |      |          | 57   | 125   | 80    | 38.91  | 25.49  | 55.98  | 80    |       |    |
| 1999                          | 96                 |      |          | 62   | 137   | 81    | 39.42  | 25.45  | 56.46  | 78    |       |    |
| 2000                          | 103                |      |          | 71   | 157   | 77    | 39.36  | 27.33  | 60.11  | 76    |       |    |
| 2001                          | 119                |      |          | 81   | 177   | 78    | 42.86  | 29.22  | 63.80  | 73    |       |    |
| 2002                          | 122                |      |          | 91   | 201   | 75    | 41.45  | 31.01  | 68.40  | 71    |       |    |
| 2003                          | 131                |      |          | 92   | 225   | 75    | 42.47  | 29.82  | 72.84  | 68    |       |    |
| 2004                          | 139                |      |          | 91   | 247   | 76    | 43.14  | 28.29  | 76.94  | 69    |       |    |
| 2005                          | 144                |      |          | 88   | 267   | 76    | 42.63  | 25.93  | 78.90  | 69    |       |    |
| 2006                          | 146                | 82   | 280      | 76   | 41.40 | 23.32 | 79.39  | 68     |        |       |       |    |
| 2007                          | 144                | 74   | 286      | 81   | 39.31 | 20.27 | 77.99  | 72     |        |       |       |    |

| Metropolitan Statistical Area | PWID Population | Year   | Number | Min   | Max   | Rank  | Rate  | Min    | Max    | Rank  |    |
|-------------------------------|-----------------|--------|--------|-------|-------|-------|-------|--------|--------|-------|----|
| Omaha, NE--IA                 | Male            | 1992   | 1,836  | 1,255 | 2,474 | 92    | 86.05 | 58.83  | 115.98 | 88    |    |
|                               |                 | 1993   | 1,775  | 1,186 | 2,363 | 91    | 82.69 | 55.25  | 110.08 | 83    |    |
|                               |                 | 1994   | 1,679  | 1,128 | 2,283 | 94    | 77.27 | 51.92  | 105.07 | 88    |    |
|                               |                 | 1995   | 1,636  | 1,083 | 2,228 | 92    | 73.92 | 48.96  | 100.68 | 87    |    |
|                               |                 | 1996   | 1,595  | 1,045 | 2,209 | 93    | 70.49 | 46.19  | 97.61  | 87    |    |
|                               |                 | 1997   | 1,552  | 1,005 | 2,185 | 92    | 67.55 | 43.75  | 95.08  | 88    |    |
|                               |                 | 1998   | 1,530  | 1,002 | 2,201 | 92    | 65.78 | 43.10  | 94.64  | 89    |    |
|                               |                 | 1999   | 1,556  | 1,004 | 2,228 | 92    | 66.01 | 42.61  | 94.53  | 89    |    |
|                               |                 | 2000   | 1,546  | 1,074 | 2,362 | 92    | 64.74 | 44.95  | 98.88  | 88    |    |
|                               |                 | 2001   | 1,679  | 1,145 | 2,499 | 92    | 69.51 | 47.40  | 103.46 | 87    |    |
|                               |                 | 2002   | 1,630  | 1,219 | 2,690 | 89    | 66.71 | 49.91  | 110.09 | 86    |    |
|                               |                 | 2003   | 1,685  | 1,183 | 2,890 | 89    | 68.28 | 47.94  | 117.10 | 85    |    |
|                               |                 | 2004   | 1,741  | 1,142 | 3,105 | 89    | 69.47 | 45.55  | 123.90 | 85    |    |
|                               |                 | 2005   | 1,801  | 1,096 | 3,334 | 89    | 70.77 | 43.05  | 130.99 | 82    |    |
|                               | 2006            | 1,857  | 1,046  | 3,561 | 91    | 72.04 | 40.57 | 138.13 | 82     |       |    |
|                               | 2007            | 1,910  | 985    | 3,790 | 91    | 73.38 | 37.84 | 145.58 | 78     |       |    |
|                               |                 | Female | 1992   | 697   | 477   | 940   | 96    | 31.83  | 21.76  | 42.90 | 93 |
|                               |                 |        | 1993   | 767   | 512   | 1,021 | 93    | 34.85  | 23.29  | 46.39 | 88 |
|                               |                 |        | 1994   | 812   | 546   | 1,105 | 94    | 36.58  | 24.58  | 49.74 | 89 |
|                               |                 |        | 1995   | 873   | 578   | 1,189 | 93    | 38.65  | 25.60  | 52.64 | 86 |
|                               |                 |        | 1996   | 925   | 606   | 1,281 | 91    | 40.15  | 26.31  | 55.60 | 86 |
|                               |                 |        | 1997   | 964   | 624   | 1,357 | 88    | 41.28  | 26.74  | 58.10 | 85 |
|                               |                 |        | 1998   | 1,004 | 658   | 1,444 | 88    | 42.54  | 27.87  | 61.20 | 82 |
|                               |                 |        | 1999   | 1,064 | 687   | 1,524 | 88    | 44.63  | 28.81  | 63.92 | 86 |
|                               |                 |        | 2000   | 1,090 | 757   | 1,665 | 88    | 45.20  | 31.39  | 69.04 | 76 |
|                               |                 |        | 2001   | 1,205 | 822   | 1,794 | 88    | 49.57  | 33.80  | 73.79 | 77 |
|                               | 2002            |        | 1,179  | 882   | 1,945 | 88    | 47.99 | 35.90  | 79.19  | 74    |    |
|                               | 2003            |        | 1,216  | 854   | 2,085 | 89    | 48.95 | 34.37  | 83.94  | 74    |    |
|                               | 2004            | 1,241  | 814    | 2,213 | 88    | 49.38 | 32.38 | 88.06  | 73     |       |    |
|                               | 2005            | 1,257  | 765    | 2,327 | 88    | 49.37 | 30.03 | 91.37  | 74     |       |    |
|                               | 2006            | 1,259  | 709    | 2,415 | 91    | 48.93 | 27.55 | 93.81  | 73     |       |    |
|                               | 2007            | 1,248  | 644    | 2,476 | 91    | 48.00 | 24.75 | 95.22  | 73     |       |    |

| Metropolitan Statistical Area | PWID Population | Year        | Number | Min   | Max   | Rank  | Rate  | Min    | Max    | Rank  |    |
|-------------------------------|-----------------|-------------|--------|-------|-------|-------|-------|--------|--------|-------|----|
| Omaha, NE--IA                 | Young (15-29)   | 1992        | 737    | 504   | 993   | 92    | 49.94 | 34.14  | 67.31  | 79    |    |
|                               |                 | 1993        | 750    | 501   | 998   | 87    | 51.45 | 34.37  | 68.48  | 73    |    |
|                               |                 | 1994        | 752    | 505   | 1,022 | 88    | 51.67 | 34.71  | 70.25  | 74    |    |
|                               |                 | 1995        | 779    | 516   | 1,061 | 86    | 52.88 | 35.02  | 72.03  | 67    |    |
|                               |                 | 1996        | 808    | 529   | 1,118 | 87    | 53.70 | 35.19  | 74.36  | 69    |    |
|                               |                 | 1997        | 832    | 539   | 1,171 | 88    | 54.44 | 35.26  | 76.63  | 68    |    |
|                               |                 | 1998        | 863    | 565   | 1,242 | 88    | 55.84 | 36.58  | 80.33  | 68    |    |
|                               |                 | 1999        | 915    | 591   | 1,311 | 87    | 58.60 | 37.83  | 83.93  | 73    |    |
|                               |                 | 2000        | 938    | 651   | 1,433 | 88    | 59.72 | 41.47  | 91.21  | 72    |    |
|                               |                 | 2001        | 1,036  | 707   | 1,542 | 87    | 65.85 | 44.90  | 98.02  | 73    |    |
|                               |                 | 2002        | 1,008  | 754   | 1,663 | 89    | 63.60 | 47.58  | 104.96 | 76    |    |
|                               |                 | 2003        | 1,026  | 720   | 1,759 | 92    | 64.08 | 44.99  | 109.89 | 78    |    |
|                               |                 | 2004        | 1,023  | 671   | 1,824 | 92    | 63.16 | 41.41  | 112.65 | 80    |    |
|                               |                 | 2005        | 998    | 607   | 1,847 | 94    | 60.70 | 36.92  | 112.36 | 84    |    |
|                               |                 | 2006        | 945    | 532   | 1,811 | 96    | 56.79 | 31.98  | 108.89 | 92    |    |
|                               | 2007            | 865         | 446    | 1,716 | 98    | 51.34 | 26.47 | 101.85 | 94     |       |    |
|                               |                 | Old (30-64) | 1992   | 1,833 | 1,253 | 2,471 | 96    | 64.37  | 44.01  | 86.76 | 91 |
|                               |                 |             | 1993   | 1,796 | 1,200 | 2,391 | 94    | 62.17  | 41.54  | 82.76 | 89 |
|                               |                 |             | 1994   | 1,727 | 1,160 | 2,348 | 96    | 58.77  | 39.49  | 79.91 | 91 |
|                               |                 |             | 1995   | 1,712 | 1,134 | 2,332 | 94    | 57.12  | 37.83  | 77.80 | 93 |
|                               | 1996            |             | 1,701  | 1,114 | 2,355 | 95    | 55.52 | 36.38  | 76.88  | 93    |    |
|                               | 1997            |             | 1,683  | 1,090 | 2,368 | 95    | 54.20 | 35.11  | 76.29  | 92    |    |
|                               | 1998            |             | 1,682  | 1,102 | 2,419 | 93    | 53.56 | 35.09  | 77.06  | 93    |    |
|                               | 1999            |             | 1,726  | 1,114 | 2,473 | 95    | 54.29 | 35.05  | 77.76  | 88    |    |
|                               | 2000            |             | 1,723  | 1,197 | 2,632 | 92    | 53.37 | 37.06  | 81.52  | 91    |    |
|                               | 2001            |             | 1,867  | 1,273 | 2,779 | 92    | 57.04 | 38.89  | 84.90  | 84    |    |
|                               | 2002            | 1,794       | 1,342  | 2,961 | 89    | 54.14 | 40.50 | 89.34  | 82     |       |    |
|                               | 2003            | 1,821       | 1,279  | 3,123 | 89    | 54.35 | 38.16 | 93.20  | 80     |       |    |
|                               | 2004            | 1,827       | 1,198  | 3,259 | 89    | 53.74 | 35.24 | 95.84  | 77     |       |    |
|                               | 2005            | 1,813       | 1,103  | 3,355 | 92    | 52.56 | 31.97 | 97.29  | 78     |       |    |
|                               | 2006            | 1,764       | 994    | 3,383 | 92    | 50.57 | 28.48 | 96.96  | 80     |       |    |
|                               | 2007            | 1,678       | 865    | 3,330 | 92    | 47.69 | 24.59 | 94.61  | 81     |       |    |

| Metropolitan Statistical Area | PWID Population | Year  | Number             | Min    | Max    | Rank  | Rate   | Min    | Max    | Rank  |        |    |
|-------------------------------|-----------------|-------|--------------------|--------|--------|-------|--------|--------|--------|-------|--------|----|
| Orange County, CA             | Total           | 1992  | 23,564             | 18,291 | 28,829 | 15    | 137.54 | 106.76 | 168.27 | 40    |        |    |
|                               |                 | 1993  | 24,492             | 18,095 | 31,169 | 14    | 142.21 | 105.06 | 180.97 | 34    |        |    |
|                               |                 | 1994  | 21,031             | 17,909 | 22,665 | 17    | 121.39 | 103.37 | 130.82 | 43    |        |    |
|                               |                 | 1995  | 22,082             | 17,765 | 28,717 | 18    | 126.41 | 101.70 | 164.39 | 36    |        |    |
|                               |                 | 1996  | 21,510             | 17,654 | 27,572 | 18    | 121.91 | 100.06 | 156.26 | 38    |        |    |
|                               |                 | 1997  | 21,596             | 17,843 | 26,797 | 17    | 119.14 | 98.44  | 147.84 | 41    |        |    |
|                               |                 | 1998  | 21,568             | 18,029 | 25,953 | 16    | 115.85 | 96.85  | 139.41 | 42    |        |    |
|                               |                 | 1999  | 19,778             | 18,031 | 23,087 | 17    | 104.51 | 95.28  | 122.00 | 47    |        |    |
|                               |                 | 2000  | 20,157             | 16,569 | 23,726 | 19    | 104.92 | 86.25  | 123.50 | 44    |        |    |
|                               |                 | 2001  | 17,593             | 14,506 | 20,330 | 21    | 90.43  | 74.56  | 104.50 | 58    |        |    |
|                               |                 | 2002  | 16,942             | 11,987 | 20,342 | 20    | 86.23  | 61.01  | 103.54 | 56    |        |    |
|                               |                 | 2003  | 15,598             | 9,689  | 18,544 | 25    | 78.70  | 48.88  | 93.56  | 63    |        |    |
|                               |                 | 2004  | 14,989             | 8,223  | 17,565 | 25    | 75.08  | 41.19  | 87.98  | 65    |        |    |
|                               |                 | 2005  | 14,949             | 7,302  | 20,696 | 25    | 74.67  | 36.47  | 103.38 | 65    |        |    |
|                               |                 | 2006  | 14,960             | 6,439  | 24,003 | 25    | 74.57  | 32.10  | 119.65 | 65    |        |    |
|                               |                 | 2007  | 15,101             | 5,728  | 27,769 | 25    | 75.03  | 28.46  | 137.96 | 64    |        |    |
|                               |                 |       | Non-Hispanic White | 1992   | 11,871 | 9,214 | 14,523 | 16     | 111.61 | 86.63 | 136.55 | 33 |
|                               |                 |       |                    | 1993   | 12,032 | 8,890 | 15,312 | 14     | 115.28 | 85.17 | 146.70 | 29 |
|                               |                 |       |                    | 1994   | 10,071 | 8,576 | 10,854 | 19     | 98.22  | 83.64 | 105.85 | 40 |
|                               |                 |       |                    | 1995   | 10,309 | 8,294 | 13,406 | 17     | 101.92 | 82.00 | 132.54 | 31 |
| 1996                          | 9,795           |       |                    | 8,039  | 12,556 | 19    | 97.90  | 80.35  | 125.49 | 34    |        |    |
| 1997                          | 9,604           |       |                    | 7,935  | 11,917 | 20    | 95.22  | 78.68  | 118.16 | 37    |        |    |
| 1998                          | 9,384           |       |                    | 7,845  | 11,292 | 22    | 92.27  | 77.13  | 111.03 | 37    |        |    |
| 1999                          | 8,441           |       |                    | 7,696  | 9,854  | 23    | 83.20  | 75.85  | 97.12  | 46    |        |    |
| 2000                          | 8,467           |       |                    | 6,960  | 9,966  | 23    | 83.79  | 68.88  | 98.63  | 43    |        |    |
| 2001                          | 7,303           |       |                    | 6,022  | 8,439  | 26    | 72.43  | 59.72  | 83.70  | 56    |        |    |
| 2002                          | 6,984           |       |                    | 4,942  | 8,386  | 28    | 69.53  | 49.19  | 83.48  | 57    |        |    |
| 2003                          | 6,422           |       |                    | 3,989  | 7,634  | 32    | 64.18  | 39.87  | 76.31  | 62    |        |    |
| 2004                          | 6,201           |       |                    | 3,402  | 7,267  | 33    | 62.30  | 34.18  | 73.01  | 64    |        |    |
| 2005                          | 6,256           |       |                    | 3,056  | 8,661  | 32    | 63.46  | 30.99  | 87.85  | 63    |        |    |
| 2006                          | 6,376           | 2,744 | 10,230             | 33     | 65.26  | 28.09 | 104.70 | 61     |        |       |        |    |
| 2007                          | 6,600           | 2,504 | 12,137             | 32     | 68.18  | 25.86 | 125.38 | 62     |        |       |        |    |

| Metropolitan Statistical Area | PWID Population    | Year  | Number   | Min   | Max   | Rank  | Rate   | Min    | Max    | Rank   |        |    |
|-------------------------------|--------------------|-------|----------|-------|-------|-------|--------|--------|--------|--------|--------|----|
| Orange County, CA             | Non-Hispanic Black | 1992  | 599      | 465   | 733   | 89    | 203.25 | 157.76 | 248.66 | 74     |        |    |
|                               |                    | 1993  | 670      | 495   | 852   | 86    | 224.84 | 166.11 | 286.12 | 55     |        |    |
|                               |                    | 1994  | 598      | 509   | 645   | 86    | 198.06 | 168.66 | 213.45 | 72     |        |    |
|                               |                    | 1995  | 635      | 511   | 826   | 86    | 207.69 | 167.09 | 270.09 | 55     |        |    |
|                               |                    | 1996  | 612      | 502   | 784   | 86    | 196.68 | 161.43 | 252.11 | 55     |        |    |
|                               |                    | 1997  | 597      | 493   | 741   | 87    | 185.95 | 153.64 | 230.74 | 58     |        |    |
|                               |                    | 1998  | 573      | 479   | 690   | 85    | 173.69 | 145.19 | 209.01 | 59     |        |    |
|                               |                    | 1999  | 503      | 458   | 587   | 87    | 150.61 | 137.31 | 175.81 | 72     |        |    |
|                               |                    | 2000  | 490      | 403   | 577   | 86    | 144.89 | 119.10 | 170.54 | 67     |        |    |
|                               |                    | 2001  | 411      | 339   | 475   | 90    | 118.23 | 97.48  | 136.62 | 76     |        |    |
|                               |                    | 2002  | 385      | 273   | 462   | 88    | 108.20 | 76.56  | 129.91 | 75     |        |    |
|                               |                    | 2003  | 351      | 218   | 417   | 91    | 96.40  | 59.88  | 114.61 | 78     |        |    |
|                               |                    | 2004  | 341      | 187   | 399   | 91    | 91.63  | 50.27  | 107.38 | 78     |        |    |
|                               |                    | 2005  | 354      | 173   | 490   | 91    | 93.69  | 45.76  | 129.71 | 75     |        |    |
|                               |                    | 2006  | 383      | 165   | 614   | 89    | 99.87  | 42.99  | 160.24 | 72     |        |    |
|                               |                    | 2007  | 436      | 165   | 802   | 87    | 113.04 | 42.88  | 207.86 | 67     |        |    |
|                               |                    |       | Hispanic | 1992  | 8,186 | 6,354 | 10,015 | 8      | 197.26 | 153.11 | 241.33 | 33 |
|                               |                    |       |          | 1993  | 8,562 | 6,326 | 10,896 | 6      | 198.51 | 146.66 | 252.62 | 33 |
|                               |                    |       |          | 1994  | 7,408 | 6,308 | 7,984  | 7      | 165.44 | 140.88 | 178.30 | 34 |
|                               |                    |       |          | 1995  | 7,844 | 6,310 | 10,200 | 6      | 169.13 | 136.06 | 219.94 | 33 |
| 1996                          | 7,705              |       |          | 6,324 | 9,876 | 6     | 160.28 | 131.55 | 205.45 | 32     |        |    |
| 1997                          | 7,797              |       |          | 6,442 | 9,675 | 6     | 154.47 | 127.62 | 191.67 | 33     |        |    |
| 1998                          | 7,841              |       |          | 6,554 | 9,435 | 7     | 147.94 | 123.67 | 178.02 | 33     |        |    |
| 1999                          | 7,228              |       |          | 6,590 | 8,438 | 7     | 131.48 | 119.87 | 153.48 | 33     |        |    |
| 2000                          | 7,391              |       |          | 6,075 | 8,699 | 6     | 129.70 | 106.61 | 152.66 | 32     |        |    |
| 2001                          | 6,455              |       |          | 5,323 | 7,460 | 12    | 110.19 | 90.85  | 127.33 | 38     |        |    |
| 2002                          | 6,202              |       |          | 4,388 | 7,447 | 9     | 103.53 | 73.26  | 124.31 | 41     |        |    |
| 2003                          | 5,677              |       |          | 3,527 | 6,750 | 12    | 92.95  | 57.74  | 110.50 | 44     |        |    |
| 2004                          | 5,404              |       |          | 2,964 | 6,332 | 13    | 87.02  | 47.74  | 101.97 | 44     |        |    |
| 2005                          | 5,314              |       |          | 2,596 | 7,357 | 14    | 84.58  | 41.31  | 117.09 | 44     |        |    |
| 2006                          | 5,219              | 2,246 | 8,374    | 14    | 82.27 | 35.41 | 131.99 | 46     |        |        |        |    |
| 2007                          | 5,144              | 1,951 | 9,459    | 14    | 79.85 | 30.29 | 146.84 | 47     |        |        |        |    |

| Metropolitan Statistical Area | PWID Population | Year   | Number | Min    | Max    | Rank   | Rate   | Min    | Max    | Rank   |    |
|-------------------------------|-----------------|--------|--------|--------|--------|--------|--------|--------|--------|--------|----|
| Orange County, CA             | Male            | 1992   | 14,664 | 11,382 | 17,940 | 19     | 166.66 | 129.36 | 203.89 | 42     |    |
|                               |                 | 1993   | 15,576 | 11,508 | 19,822 | 14     | 176.35 | 130.29 | 224.42 | 35     |    |
|                               |                 | 1994   | 13,612 | 11,591 | 14,670 | 20     | 153.63 | 130.82 | 165.56 | 42     |    |
|                               |                 | 1995   | 14,496 | 11,662 | 18,851 | 15     | 162.59 | 130.80 | 211.44 | 37     |    |
|                               |                 | 1996   | 14,279 | 11,720 | 18,304 | 15     | 158.89 | 130.41 | 203.67 | 39     |    |
|                               |                 | 1997   | 14,462 | 11,949 | 17,945 | 15     | 157.02 | 129.73 | 194.83 | 39     |    |
|                               |                 | 1998   | 14,540 | 12,155 | 17,497 | 15     | 154.07 | 128.80 | 185.40 | 40     |    |
|                               |                 | 1999   | 13,400 | 12,217 | 15,642 | 16     | 140.06 | 127.69 | 163.50 | 41     |    |
|                               |                 | 2000   | 13,707 | 11,267 | 16,133 | 16     | 141.22 | 116.08 | 166.22 | 41     |    |
|                               |                 | 2001   | 11,994 | 9,890  | 13,860 | 20     | 121.92 | 100.53 | 140.89 | 54     |    |
|                               |                 | 2002   | 11,572 | 8,188  | 13,894 | 19     | 116.40 | 82.36  | 139.76 | 53     |    |
|                               |                 | 2003   | 10,668 | 6,627  | 12,683 | 21     | 106.36 | 66.07  | 126.45 | 57     |    |
|                               |                 | 2004   | 10,265 | 5,631  | 12,029 | 21     | 101.51 | 55.69  | 118.96 | 59     |    |
|                               |                 | 2005   | 10,251 | 5,007  | 14,191 | 22     | 100.99 | 49.33  | 139.82 | 59     |    |
|                               | 2006            | 10,276 | 4,423  | 16,488 | 21     | 100.97 | 43.46  | 162.00 | 59     |        |    |
|                               | 2007            | 10,398 | 3,944  | 19,120 | 22     | 101.70 | 38.58  | 187.01 | 58     |        |    |
|                               |                 | Female | 1992   | 8,524  | 6,616  | 10,428 | 16     | 102.29 | 79.40  | 125.14 | 35 |
|                               |                 |        | 1993   | 8,724  | 6,445  | 11,102 | 16     | 103.97 | 76.82  | 132.31 | 27 |
|                               |                 |        | 1994   | 7,386  | 6,289  | 7,960  | 18     | 87.26  | 74.30  | 94.04  | 38 |
|                               |                 |        | 1995   | 7,655  | 6,158  | 9,955  | 18     | 89.50  | 72.00  | 116.39 | 34 |
|                               |                 |        | 1996   | 7,368  | 6,047  | 9,445  | 19     | 85.10  | 69.85  | 109.09 | 38 |
|                               |                 |        | 1997   | 7,317  | 6,045  | 9,079  | 19     | 82.07  | 67.81  | 101.84 | 42 |
|                               |                 |        | 1998   | 7,234  | 6,047  | 8,705  | 20     | 78.81  | 65.88  | 94.83  | 44 |
|                               |                 |        | 1999   | 6,572  | 5,991  | 7,671  | 21     | 70.23  | 64.03  | 81.98  | 52 |
|                               |                 |        | 2000   | 6,639  | 5,457  | 7,814  | 20     | 69.84  | 57.41  | 82.21  | 53 |
|                               |                 |        | 2001   | 5,746  | 4,738  | 6,640  | 22     | 59.74  | 49.26  | 69.04  | 62 |
|                               | 2002            |        | 5,489  | 3,884  | 6,590  | 26     | 56.55  | 40.01  | 67.90  | 64     |    |
|                               | 2003            |        | 5,013  | 3,114  | 5,960  | 27     | 51.21  | 31.81  | 60.89  | 72     |    |
|                               | 2004            | 4,780  | 2,622  | 5,602  | 32     | 48.52  | 26.62  | 56.86  | 75     |        |    |
|                               | 2005            | 4,730  | 2,310  | 6,548  | 33     | 47.92  | 23.41  | 66.35  | 78     |        |    |
|                               | 2006            | 4,696  | 2,021  | 7,534  | 33     | 47.51  | 20.45  | 76.23  | 75     |        |    |
|                               | 2007            | 4,701  | 1,783  | 8,645  | 33     | 47.47  | 18.01  | 87.29  | 75     |        |    |

| Metropolitan Statistical Area | PWID Population | Year        | Number | Min    | Max    | Rank   | Rate   | Min    | Max    | Rank   |    |
|-------------------------------|-----------------|-------------|--------|--------|--------|--------|--------|--------|--------|--------|----|
| Orange County, CA             | Young (15-29)   | 1992        | 7,895  | 6,128  | 9,659  | 11     | 128.38 | 99.65  | 157.06 | 27     |    |
|                               |                 | 1993        | 7,698  | 5,688  | 9,797  | 11     | 127.91 | 94.50  | 162.78 | 25     |    |
|                               |                 | 1994        | 6,292  | 5,358  | 6,781  | 15     | 106.52 | 90.71  | 114.80 | 34     |    |
|                               |                 | 1995        | 6,376  | 5,129  | 8,291  | 12     | 109.18 | 87.84  | 141.98 | 33     |    |
|                               |                 | 1996        | 6,070  | 4,982  | 7,781  | 13     | 104.44 | 85.72  | 133.87 | 38     |    |
|                               |                 | 1997        | 6,024  | 4,977  | 7,475  | 13     | 102.06 | 84.32  | 126.64 | 40     |    |
|                               |                 | 1998        | 6,005  | 5,019  | 7,226  | 13     | 100.03 | 83.62  | 120.37 | 41     |    |
|                               |                 | 1999        | 5,539  | 5,050  | 6,466  | 17     | 91.77  | 83.66  | 107.12 | 45     |    |
|                               |                 | 2000        | 5,714  | 4,697  | 6,725  | 16     | 93.76  | 77.07  | 110.35 | 48     |    |
|                               |                 | 2001        | 5,068  | 4,179  | 5,857  | 19     | 83.60  | 68.93  | 96.61  | 63     |    |
|                               |                 | 2002        | 4,972  | 3,518  | 5,970  | 24     | 82.42  | 58.32  | 98.96  | 62     |    |
|                               |                 | 2003        | 4,666  | 2,899  | 5,548  | 24     | 77.35  | 48.05  | 91.96  | 65     |    |
|                               |                 | 2004        | 4,566  | 2,505  | 5,350  | 29     | 75.49  | 41.41  | 88.46  | 68     |    |
|                               |                 | 2005        | 4,623  | 2,258  | 6,400  | 27     | 76.25  | 37.24  | 105.56 | 71     |    |
|                               |                 | 2006        | 4,675  | 2,012  | 7,501  | 26     | 76.75  | 33.03  | 123.14 | 66     |    |
|                               | 2007            | 4,740       | 1,798  | 8,716  | 27     | 77.04  | 29.22  | 141.66 | 65     |        |    |
|                               |                 | Old (30-64) | 1992   | 15,907 | 12,347 | 19,461 | 18     | 144.84 | 112.42 | 177.20 | 41 |
|                               |                 |             | 1993   | 16,948 | 12,521 | 21,568 | 16     | 151.26 | 111.75 | 192.49 | 33 |
|                               |                 |             | 1994   | 14,842 | 12,639 | 15,995 | 19     | 129.99 | 110.69 | 140.09 | 43 |
|                               |                 |             | 1995   | 15,825 | 12,731 | 20,580 | 16     | 136.09 | 109.48 | 176.97 | 37 |
|                               |                 |             | 1996   | 15,592 | 12,797 | 19,986 | 17     | 131.77 | 108.15 | 168.91 | 37 |
| 1997                          |                 |             | 15,776 | 13,034 | 19,575 | 16     | 129.06 | 106.63 | 160.14 | 38     |    |
| 1998                          |                 |             | 15,820 | 13,225 | 19,037 | 16     | 125.42 | 104.85 | 150.92 | 39     |    |
| 1999                          |                 |             | 14,516 | 13,234 | 16,945 | 17     | 112.63 | 102.69 | 131.48 | 45     |    |
| 2000                          |                 |             | 14,753 | 12,127 | 17,365 | 18     | 112.47 | 92.45  | 132.38 | 41     |    |
| 2001                          |                 |             | 12,796 | 10,551 | 14,787 | 22     | 95.54  | 78.78  | 110.41 | 53     |    |
| 2002                          |                 |             | 12,204 | 8,635  | 14,654 | 21     | 89.64  | 63.43  | 107.64 | 55     |    |
| 2003                          |                 |             | 11,089 | 6,888  | 13,184 | 24     | 80.43  | 49.96  | 95.62  | 56     |    |
| 2004                          |                 |             | 10,480 | 5,749  | 12,280 | 25     | 75.31  | 41.31  | 88.25  | 60     |    |
| 2005                          |                 |             | 10,236 | 5,000  | 14,171 | 26     | 73.34  | 35.82  | 101.53 | 59     |    |
| 2006                          |                 |             | 9,986  | 4,298  | 16,022 | 26     | 71.49  | 30.77  | 114.70 | 57     |    |
| 2007                          | 9,771           | 3,706       | 17,967 | 26     | 69.92  | 26.52  | 128.57 | 56     |        |        |    |



| Metropolitan Statistical Area | PWID Population | Year  | Number             | Min   | Max    | Rank  | Rate   | Min   | Max    | Rank  |       |    |
|-------------------------------|-----------------|-------|--------------------|-------|--------|-------|--------|-------|--------|-------|-------|----|
| Orlando, FL                   | Total           | 1992  | 6,549              | 3,406 | 8,174  | 66    | 75.00  | 39.00 | 93.60  | 76    |       |    |
|                               |                 | 1993  | 6,092              | 3,128 | 8,770  | 66    | 68.12  | 34.98 | 98.06  | 80    |       |    |
|                               |                 | 1994  | 7,611              | 5,483 | 9,418  | 57    | 82.96  | 59.76 | 102.65 | 69    |       |    |
|                               |                 | 1995  | 6,937              | 3,284 | 10,087 | 59    | 73.75  | 34.92 | 107.24 | 71    |       |    |
|                               |                 | 1996  | 7,278              | 3,387 | 10,843 | 56    | 75.15  | 34.97 | 111.96 | 69    |       |    |
|                               |                 | 1997  | 7,651              | 3,514 | 11,729 | 49    | 76.11  | 34.96 | 116.68 | 66    |       |    |
|                               |                 | 1998  | 8,134              | 3,636 | 12,667 | 48    | 78.18  | 34.95 | 121.75 | 65    |       |    |
|                               |                 | 1999  | 10,296             | 7,816 | 13,579 | 41    | 96.18  | 73.01 | 126.83 | 54    |       |    |
|                               |                 | 2000  | 9,232              | 3,832 | 14,689 | 43    | 83.31  | 34.58 | 132.55 | 60    |       |    |
|                               |                 | 2001  | 11,692             | 7,816 | 15,841 | 35    | 102.06 | 68.23 | 138.27 | 49    |       |    |
|                               |                 | 2002  | 9,959              | 3,674 | 16,944 | 41    | 84.40  | 31.14 | 143.61 | 57    |       |    |
|                               |                 | 2003  | 9,977              | 3,567 | 18,061 | 41    | 82.27  | 29.41 | 148.95 | 60    |       |    |
|                               |                 | 2004  | 10,026             | 3,476 | 19,378 | 41    | 79.84  | 27.68 | 154.31 | 60    |       |    |
|                               |                 | 2005  | 10,138             | 3,346 | 20,843 | 42    | 77.66  | 25.63 | 159.67 | 63    |       |    |
|                               |                 | 2006  | 10,140             | 3,170 | 22,162 | 41    | 75.46  | 23.59 | 164.93 | 64    |       |    |
|                               |                 | 2007  | 9,996              | 2,894 | 23,214 | 41    | 73.28  | 21.21 | 170.19 | 66    |       |    |
|                               |                 |       | Non-Hispanic White | 1992  | 4,022  | 2,091 | 5,019  | 57    | 60.43  | 31.42 | 75.42 | 60 |
|                               |                 |       |                    | 1993  | 3,547  | 1,822 | 5,106  | 60    | 52.93  | 27.18 | 76.20 | 63 |
|                               |                 |       |                    | 1994  | 4,237  | 3,052 | 5,243  | 55    | 62.61  | 45.10 | 77.47 | 59 |
|                               |                 |       |                    | 1995  | 3,726  | 1,764 | 5,418  | 58    | 54.66  | 25.88 | 79.48 | 61 |
| 1996                          | 3,808           |       |                    | 1,772 | 5,673  | 56    | 55.27  | 25.72 | 82.34  | 64    |       |    |
| 1997                          | 3,936           |       |                    | 1,808 | 6,034  | 52    | 56.07  | 25.76 | 85.96  | 63    |       |    |
| 1998                          | 4,153           |       |                    | 1,856 | 6,467  | 49    | 58.22  | 26.03 | 90.67  | 62    |       |    |
| 1999                          | 5,262           |       |                    | 3,994 | 6,939  | 39    | 73.15  | 55.53 | 96.46  | 55    |       |    |
| 2000                          | 4,760           |       |                    | 1,976 | 7,573  | 39    | 65.18  | 27.06 | 103.71 | 59    |       |    |
| 2001                          | 6,123           |       |                    | 4,093 | 8,295  | 36    | 82.32  | 55.03 | 111.53 | 46    |       |    |
| 2002                          | 5,328           |       |                    | 1,965 | 9,064  | 39    | 70.59  | 26.04 | 120.11 | 56    |       |    |
| 2003                          | 5,477           |       |                    | 1,958 | 9,915  | 39    | 71.75  | 25.65 | 129.90 | 55    |       |    |
| 2004                          | 5,666           |       |                    | 1,964 | 10,951 | 38    | 72.97  | 25.30 | 141.04 | 52    |       |    |
| 2005                          | 5,911           |       |                    | 1,951 | 12,152 | 36    | 74.79  | 24.69 | 153.76 | 51    |       |    |
| 2006                          | 6,104           | 1,908 | 13,341             | 34    | 76.68  | 23.97 | 167.59 | 49    |        |       |       |    |
| 2007                          | 6,212           | 1,798 | 14,427             | 36    | 78.14  | 22.62 | 181.48 | 47    |        |       |       |    |

| Metropolitan Statistical Area | PWID Population    | Year | Number   | Min   | Max   | Rank  | Rate   | Min    | Max    | Rank  |        |    |
|-------------------------------|--------------------|------|----------|-------|-------|-------|--------|--------|--------|-------|--------|----|
| Orlando, FL                   | Non-Hispanic Black | 1992 | 1,134    | 590   | 1,415 | 74    | 112.13 | 58.31  | 139.93 | 95    |        |    |
|                               |                    | 1993 | 1,150    | 591   | 1,656 | 69    | 108.16 | 55.54  | 155.70 | 94    |        |    |
|                               |                    | 1994 | 1,514    | 1,091 | 1,874 | 61    | 135.67 | 97.73  | 167.86 | 88    |        |    |
|                               |                    | 1995 | 1,413    | 669   | 2,055 | 62    | 120.97 | 57.28  | 175.91 | 89    |        |    |
|                               |                    | 1996 | 1,484    | 691   | 2,211 | 59    | 121.21 | 56.41  | 180.58 | 86    |        |    |
|                               |                    | 1997 | 1,534    | 705   | 2,352 | 56    | 118.24 | 54.31  | 181.26 | 82    |        |    |
|                               |                    | 1998 | 1,583    | 708   | 2,465 | 55    | 115.63 | 51.69  | 180.08 | 81    |        |    |
|                               |                    | 1999 | 1,929    | 1,464 | 2,543 | 45    | 134.78 | 102.31 | 177.75 | 75    |        |    |
|                               |                    | 2000 | 1,659    | 689   | 2,640 | 53    | 110.63 | 45.92  | 176.02 | 79    |        |    |
|                               |                    | 2001 | 2,020    | 1,350 | 2,736 | 40    | 129.18 | 86.36  | 175.01 | 73    |        |    |
|                               |                    | 2002 | 1,666    | 614   | 2,834 | 47    | 102.45 | 37.79  | 174.31 | 77    |        |    |
|                               |                    | 2003 | 1,637    | 585   | 2,963 | 45    | 96.73  | 34.58  | 175.11 | 77    |        |    |
|                               |                    | 2004 | 1,644    | 570   | 3,177 | 44    | 92.70  | 32.14  | 179.16 | 76    |        |    |
|                               |                    | 2005 | 1,702    | 562   | 3,498 | 42    | 91.06  | 30.05  | 187.20 | 77    |        |    |
|                               |                    | 2006 | 1,794    | 561   | 3,922 | 39    | 91.81  | 28.70  | 200.66 | 77    |        |    |
|                               |                    | 2007 | 1,929    | 559   | 4,481 | 37    | 96.19  | 27.85  | 223.38 | 76    |        |    |
|                               |                    |      | Hispanic | 1992  | 1,342 | 698   | 1,675  | 38     | 157.56 | 81.93 | 196.63 | 43 |
|                               |                    |      |          | 1993  | 1,167 | 599   | 1,679  | 38     | 123.80 | 63.57 | 178.21 | 46 |
|                               |                    |      |          | 1994  | 1,424 | 1,026 | 1,762  | 38     | 137.77 | 99.24 | 170.47 | 41 |
|                               |                    |      |          | 1995  | 1,316 | 623   | 1,914  | 38     | 115.45 | 54.66 | 167.89 | 44 |
| 1996                          | 1,443              |      |          | 672   | 2,150 | 38    | 114.02 | 53.06  | 169.87 | 42    |        |    |
| 1997                          | 1,619              |      |          | 743   | 2,481 | 37    | 115.46 | 53.03  | 177.00 | 39    |        |    |
| 1998                          | 1,859              |      |          | 831   | 2,896 | 34    | 120.57 | 53.90  | 187.77 | 38    |        |    |
| 1999                          | 2,556              |      |          | 1,940 | 3,371 | 27    | 150.81 | 114.48 | 198.89 | 28    |        |    |
| 2000                          | 2,482              |      |          | 1,030 | 3,949 | 28    | 132.92 | 55.18  | 211.50 | 31    |        |    |
| 2001                          | 3,375              |      |          | 2,256 | 4,572 | 19    | 166.95 | 111.61 | 226.19 | 20    |        |    |
| 2002                          | 3,041              |      |          | 1,122 | 5,175 | 25    | 140.25 | 51.74  | 238.63 | 23    |        |    |
| 2003                          | 3,161              |      |          | 1,130 | 5,723 | 23    | 136.31 | 48.73  | 246.77 | 24    |        |    |
| 2004                          | 3,215              |      |          | 1,115 | 6,215 | 22    | 128.30 | 44.48  | 247.96 | 25    |        |    |
| 2005                          | 3,192              |      |          | 1,054 | 6,563 | 23    | 116.90 | 38.58  | 240.33 | 29    |        |    |
| 2006                          | 3,019              |      |          | 944   | 6,599 | 25    | 102.70 | 32.10  | 224.46 | 37    |        |    |
| 2007                          | 2,686              | 778  | 6,239    | 26    | 87.18 | 25.24 | 202.45 | 43     |        |       |        |    |

| Metropolitan Statistical Area | PWID Population | Year   | Number | Min    | Max    | Rank  | Rate   | Min    | Max    | Rank   |    |
|-------------------------------|-----------------|--------|--------|--------|--------|-------|--------|--------|--------|--------|----|
| Orlando, FL                   | Male            | 1992   | 4,457  | 2,318  | 5,562  | 63    | 102.02 | 53.05  | 127.31 | 76     |    |
|                               |                 | 1993   | 4,090  | 2,100  | 5,888  | 65    | 91.40  | 46.94  | 131.58 | 79     |    |
|                               |                 | 1994   | 5,039  | 3,630  | 6,235  | 57    | 109.89 | 79.16  | 135.97 | 67     |    |
|                               |                 | 1995   | 4,527  | 2,143  | 6,583  | 57    | 96.40  | 45.64  | 140.19 | 69     |    |
|                               |                 | 1996   | 4,681  | 2,179  | 6,974  | 54    | 96.91  | 45.10  | 144.39 | 68     |    |
|                               |                 | 1997   | 4,852  | 2,229  | 7,438  | 53    | 96.78  | 44.45  | 148.36 | 66     |    |
|                               |                 | 1998   | 5,088  | 2,274  | 7,923  | 48    | 98.18  | 43.89  | 152.91 | 65     |    |
|                               |                 | 1999   | 6,359  | 4,827  | 8,386  | 41    | 119.35 | 90.60  | 157.39 | 55     |    |
|                               |                 | 2000   | 5,637  | 2,340  | 8,970  | 44    | 102.26 | 42.45  | 162.71 | 61     |    |
|                               |                 | 2001   | 7,071  | 4,727  | 9,580  | 37    | 124.03 | 82.92  | 168.04 | 53     |    |
|                               |                 | 2002   | 5,978  | 2,205  | 10,171 | 42    | 101.82 | 37.56  | 173.25 | 59     |    |
|                               |                 | 2003   | 5,959  | 2,130  | 10,788 | 43    | 98.63  | 35.26  | 178.56 | 62     |    |
|                               |                 | 2004   | 5,976  | 2,072  | 11,550 | 42    | 95.40  | 33.07  | 184.37 | 62     |    |
|                               |                 | 2005   | 6,050  | 1,997  | 12,438 | 41    | 92.87  | 30.65  | 190.93 | 64     |    |
|                               | 2006            | 6,079  | 1,900  | 13,287 | 41     | 90.59 | 28.32  | 197.99 | 64     |        |    |
|                               | 2007            | 6,044  | 1,750  | 14,036 | 43     | 88.59 | 25.65  | 205.74 | 65     |        |    |
|                               |                 | Female | 1992   | 2,171  | 1,129  | 2,710 | 66     | 49.77  | 25.88  | 62.11  | 74 |
|                               |                 |        | 1993   | 2,039  | 1,047  | 2,936 | 66     | 45.64  | 23.44  | 65.71  | 79 |
|                               |                 |        | 1994   | 2,585  | 1,862  | 3,199 | 60     | 56.33  | 40.58  | 69.70  | 68 |
|                               |                 |        | 1995   | 2,399  | 1,136  | 3,488 | 59     | 50.93  | 24.11  | 74.06  | 73 |
|                               |                 |        | 1996   | 2,569  | 1,195  | 3,827 | 55     | 52.91  | 24.62  | 78.83  | 67 |
|                               |                 |        | 1997   | 2,760  | 1,268  | 4,230 | 51     | 54.76  | 25.15  | 83.94  | 66 |
|                               |                 |        | 1998   | 2,998  | 1,340  | 4,670 | 47     | 57.42  | 25.67  | 89.42  | 61 |
|                               |                 |        | 1999   | 3,877  | 2,943  | 5,112 | 39     | 72.09  | 54.72  | 95.06  | 51 |
|                               |                 |        | 2000   | 3,543  | 1,471  | 5,638 | 42     | 63.62  | 26.41  | 101.24 | 57 |
|                               |                 |        | 2001   | 4,563  | 3,050  | 6,182 | 37     | 79.28  | 53.00  | 107.41 | 42 |
|                               | 2002            |        | 3,937  | 1,452  | 6,699  | 40    | 66.41  | 24.50  | 113.00 | 55     |    |
|                               | 2003            |        | 3,978  | 1,422  | 7,202  | 41    | 65.38  | 23.37  | 118.36 | 55     |    |
|                               | 2004            | 4,010  | 1,390  | 7,751  | 38     | 63.72 | 22.09  | 123.16 | 55     |        |    |
|                               | 2005            | 4,043  | 1,334  | 8,312  | 38     | 61.82 | 20.40  | 127.09 | 54     |        |    |
|                               | 2006            | 4,002  | 1,251  | 8,747  | 37     | 59.49 | 18.60  | 130.03 | 57     |        |    |
|                               | 2007            | 3,872  | 1,121  | 8,993  | 37     | 56.79 | 16.44  | 131.90 | 60     |        |    |

| Metropolitan Statistical Area | PWID Population | Year  | Number      | Min   | Max    | Rank  | Rate   | Min   | Max    | Rank  |        |    |
|-------------------------------|-----------------|-------|-------------|-------|--------|-------|--------|-------|--------|-------|--------|----|
| Orlando, FL                   | Young (15-29)   | 1992  | 1,560       | 811   | 1,946  | 72    | 52.05  | 27.07 | 64.96  | 77    |        |    |
|                               |                 | 1993  | 1,456       | 748   | 2,096  | 69    | 48.59  | 24.95 | 69.95  | 75    |        |    |
|                               |                 | 1994  | 1,894       | 1,364 | 2,344  | 56    | 62.92  | 45.33 | 77.86  | 65    |        |    |
|                               |                 | 1995  | 1,848       | 875   | 2,687  | 55    | 61.03  | 28.89 | 88.74  | 60    |        |    |
|                               |                 | 1996  | 2,114       | 984   | 3,149  | 48    | 68.55  | 31.90 | 102.13 | 57    |        |    |
|                               |                 | 1997  | 2,445       | 1,123 | 3,749  | 44    | 76.84  | 35.30 | 117.80 | 55    |        |    |
|                               |                 | 1998  | 2,863       | 1,280 | 4,458  | 35    | 87.35  | 39.05 | 136.04 | 51    |        |    |
|                               |                 | 1999  | 3,965       | 3,010 | 5,229  | 27    | 118.14 | 89.68 | 155.80 | 32    |        |    |
|                               |                 | 2000  | 3,842       | 1,595 | 6,113  | 28    | 111.17 | 46.15 | 176.88 | 36    |        |    |
|                               |                 | 2001  | 5,169       | 3,456 | 7,003  | 18    | 145.96 | 97.58 | 197.75 | 24    |        |    |
|                               |                 | 2002  | 4,579       | 1,689 | 7,791  | 25    | 126.42 | 46.64 | 215.10 | 28    |        |    |
|                               |                 | 2003  | 4,654       | 1,664 | 8,425  | 25    | 125.32 | 44.80 | 226.87 | 27    |        |    |
|                               |                 | 2004  | 4,606       | 1,597 | 8,902  | 28    | 119.94 | 41.58 | 231.81 | 34    |        |    |
|                               |                 | 2005  | 4,421       | 1,459 | 9,090  | 31    | 110.79 | 36.57 | 227.78 | 40    |        |    |
|                               |                 | 2006  | 4,005       | 1,252 | 8,753  | 34    | 97.29  | 30.41 | 212.63 | 49    |        |    |
|                               |                 | 2007  | 3,359       | 973   | 7,801  | 42    | 80.67  | 23.35 | 187.34 | 61    |        |    |
|                               |                 |       | Old (30-64) | 1992  | 5,144  | 2,675 | 6,420  | 60    | 89.68  | 46.64 | 111.92 | 71 |
|                               |                 |       |             | 1993  | 4,723  | 2,425 | 6,799  | 63    | 79.42  | 40.78 | 114.33 | 76 |
|                               |                 |       |             | 1994  | 5,778  | 4,162 | 7,149  | 59    | 93.73  | 67.52 | 115.97 | 65 |
|                               |                 |       |             | 1995  | 5,115  | 2,422 | 7,438  | 59    | 80.20  | 37.97 | 116.63 | 73 |
| 1996                          | 5,175           |       |             | 2,408 | 7,709  | 59    | 78.39  | 36.48 | 116.78 | 73    |        |    |
| 1997                          | 5,208           |       |             | 2,392 | 7,984  | 58    | 75.81  | 34.82 | 116.21 | 73    |        |    |
| 1998                          | 5,272           |       |             | 2,357 | 8,211  | 56    | 73.98  | 33.07 | 115.21 | 71    |        |    |
| 1999                          | 6,335           |       |             | 4,809 | 8,354  | 48    | 86.20  | 65.43 | 113.67 | 60    |        |    |
| 2000                          | 5,394           |       |             | 2,239 | 8,583  | 54    | 70.74  | 29.37 | 112.56 | 68    |        |    |
| 2001                          | 6,522           |       |             | 4,360 | 8,836  | 45    | 82.40  | 55.09 | 111.64 | 61    |        |    |
| 2002                          | 5,360           |       |             | 1,977 | 9,119  | 51    | 65.55  | 24.18 | 111.53 | 68    |        |    |
| 2003                          | 5,264           |       |             | 1,882 | 9,529  | 51    | 62.57  | 22.37 | 113.28 | 71    |        |    |
| 2004                          | 5,295           |       |             | 1,836 | 10,233 | 49    | 60.74  | 21.06 | 117.38 | 75    |        |    |
| 2005                          | 5,491           |       |             | 1,812 | 11,289 | 49    | 60.58  | 20.00 | 124.55 | 71    |        |    |
| 2006                          | 5,779           |       |             | 1,806 | 12,630 | 46    | 61.99  | 19.38 | 135.49 | 68    |        |    |
| 2007                          | 6,133           | 1,776 | 14,244      | 40    | 64.72  | 18.74 | 150.31 | 62    |        |       |        |    |

| Metropolitan Statistical Area | PWID Population | Year   | Number             | Min    | Max    | Rank   | Rate   | Min    | Max    | Rank  |        |    |
|-------------------------------|-----------------|--------|--------------------|--------|--------|--------|--------|--------|--------|-------|--------|----|
| Philadelphia, PA--NJ          | Total           | 1992   | 49,848             | 45,554 | 52,220 | 4      | 153.86 | 140.61 | 161.19 | 31    |        |    |
|                               |                 | 1993   | 46,814             | 35,025 | 53,969 | 3      | 144.39 | 108.03 | 166.46 | 32    |        |    |
|                               |                 | 1994   | 51,633             | 44,556 | 56,195 | 4      | 158.84 | 137.06 | 172.87 | 25    |        |    |
|                               |                 | 1995   | 48,034             | 34,582 | 58,422 | 3      | 147.33 | 106.07 | 179.19 | 29    |        |    |
|                               |                 | 1996   | 48,426             | 34,381 | 60,804 | 4      | 148.12 | 105.16 | 185.98 | 27    |        |    |
|                               |                 | 1997   | 48,845             | 34,144 | 63,689 | 4      | 149.00 | 104.16 | 194.29 | 25    |        |    |
|                               |                 | 1998   | 49,334             | 33,984 | 65,451 | 4      | 149.75 | 103.16 | 198.67 | 21    |        |    |
|                               |                 | 1999   | 55,414             | 40,471 | 65,915 | 3      | 167.28 | 122.17 | 198.98 | 14    |        |    |
|                               |                 | 2000   | 51,069             | 34,120 | 65,712 | 4      | 153.22 | 102.37 | 197.15 | 17    |        |    |
|                               |                 | 2001   | 57,670             | 46,979 | 63,468 | 3      | 172.07 | 140.17 | 189.37 | 11    |        |    |
|                               |                 | 2002   | 52,335             | 34,914 | 64,062 | 5      | 155.00 | 103.40 | 189.73 | 14    |        |    |
|                               |                 | 2003   | 52,820             | 35,335 | 65,569 | 5      | 155.35 | 103.92 | 192.84 | 14    |        |    |
|                               |                 | 2004   | 54,067             | 35,740 | 67,167 | 5      | 157.78 | 104.30 | 196.01 | 14    |        |    |
|                               |                 | 2005   | 54,373             | 36,087 | 68,726 | 5      | 157.62 | 104.61 | 199.22 | 14    |        |    |
|                               |                 | 2006   | 54,669             | 36,424 | 73,633 | 5      | 157.48 | 104.92 | 212.10 | 13    |        |    |
|                               |                 | 2007   | 54,962             | 32,043 | 79,293 | 5      | 157.53 | 91.84  | 227.26 | 14    |        |    |
|                               |                 |        | Non-Hispanic White | 1992   | 21,630 | 19,767 | 22,660 | 4      | 89.72  | 82.00 | 93.99  | 42 |
|                               |                 |        |                    | 1993   | 20,381 | 15,249 | 23,496 | 5      | 85.05  | 63.63 | 98.05  | 39 |
|                               |                 |        |                    | 1994   | 22,698 | 19,587 | 24,704 | 3      | 95.05  | 82.02 | 103.45 | 41 |
|                               |                 |        |                    | 1995   | 21,432 | 15,430 | 26,067 | 4      | 90.02  | 64.81 | 109.49 | 42 |
| 1996                          | 22,017          |        |                    | 15,632 | 27,645 | 4      | 92.80  | 65.89  | 116.52 | 41    |        |    |
| 1997                          | 22,695          |        |                    | 15,864 | 29,591 | 4      | 95.98  | 67.09  | 125.14 | 35    |        |    |
| 1998                          | 23,466          |        |                    | 16,164 | 31,131 | 4      | 99.31  | 68.41  | 131.76 | 35    |        |    |
| 1999                          | 27,004          |        |                    | 19,722 | 32,122 | 1      | 114.32 | 83.49  | 135.99 | 26    |        |    |
| 2000                          | 25,495          |        |                    | 17,034 | 32,805 | 2      | 107.84 | 72.05  | 138.77 | 26    |        |    |
| 2001                          | 29,466          |        |                    | 24,004 | 32,429 | 1      | 124.49 | 101.41 | 137.01 | 20    |        |    |
| 2002                          | 27,322          |        |                    | 18,227 | 33,444 | 2      | 115.16 | 76.83  | 140.97 | 21    |        |    |
| 2003                          | 28,108          |        |                    | 18,803 | 34,892 | 2      | 118.30 | 79.14  | 146.85 | 17    |        |    |
| 2004                          | 29,238          |        |                    | 19,327 | 36,322 | 2      | 122.80 | 81.18  | 152.56 | 16    |        |    |
| 2005                          | 29,773          |        |                    | 19,760 | 37,632 | 2      | 124.91 | 82.90  | 157.88 | 17    |        |    |
| 2006                          | 30,185          | 20,111 | 40,656             | 2      | 126.55 | 84.32  | 170.45 | 17     |        |       |        |    |
| 2007                          | 30,458          | 17,757 | 43,941             | 2      | 127.70 | 74.45  | 184.23 | 18     |        |       |        |    |

| Metropolitan Statistical Area | PWID Population    | Year  | Number   | Min    | Max    | Rank   | Rate   | Min    | Max    | Rank   |        |   |
|-------------------------------|--------------------|-------|----------|--------|--------|--------|--------|--------|--------|--------|--------|---|
| Philadelphia, PA--NJ          | Non-Hispanic Black | 1992  | 21,463   | 19,614 | 22,485 | 3      | 348.99 | 318.92 | 365.60 | 40     |        |   |
|                               |                    | 1993  | 19,754   | 14,779 | 22,773 | 3      | 318.06 | 237.97 | 366.67 | 40     |        |   |
|                               |                    | 1994  | 21,145   | 18,247 | 23,014 | 4      | 337.18 | 290.96 | 366.97 | 35     |        |   |
|                               |                    | 1995  | 18,927   | 13,626 | 23,020 | 4      | 299.18 | 215.39 | 363.89 | 36     |        |   |
|                               |                    | 1996  | 18,219   | 12,935 | 22,876 | 4      | 286.07 | 203.10 | 359.19 | 33     |        |   |
|                               |                    | 1997  | 17,432   | 12,185 | 22,729 | 4      | 271.65 | 189.89 | 354.20 | 32     |        |   |
|                               |                    | 1998  | 16,615   | 11,445 | 22,043 | 4      | 256.62 | 176.77 | 340.46 | 32     |        |   |
|                               |                    | 1999  | 17,552   | 12,819 | 20,878 | 5      | 268.50 | 196.10 | 319.38 | 22     |        |   |
|                               |                    | 2000  | 15,191   | 10,149 | 19,546 | 5      | 230.63 | 154.08 | 296.75 | 32     |        |   |
|                               |                    | 2001  | 16,124   | 13,135 | 17,745 | 5      | 243.01 | 197.96 | 267.44 | 23     |        |   |
|                               |                    | 2002  | 13,802   | 9,208  | 16,895 | 6      | 205.84 | 137.32 | 251.96 | 35     |        |   |
|                               |                    | 2003  | 13,222   | 8,845  | 16,414 | 8      | 194.91 | 130.38 | 241.95 | 35     |        |   |
|                               |                    | 2004  | 12,968   | 8,572  | 16,110 | 8      | 188.57 | 124.65 | 234.26 | 36     |        |   |
|                               |                    | 2005  | 12,654   | 8,398  | 15,994 | 8      | 181.90 | 120.72 | 229.91 | 39     |        |   |
|                               |                    | 2006  | 12,544   | 8,357  | 16,895 | 7      | 178.43 | 118.88 | 240.32 | 41     |        |   |
|                               |                    | 2007  | 12,677   | 7,391  | 18,289 | 6      | 178.86 | 104.28 | 258.04 | 43     |        |   |
|                               |                    |       | Hispanic | 1992   | 6,973  | 6,372  | 7,304  | 9      | 565.35 | 516.65 | 592.26 | 5 |
|                               |                    |       |          | 1993   | 6,038  | 4,517  | 6,961  | 11     | 470.37 | 351.92 | 542.26 | 6 |
|                               |                    |       |          | 1994   | 6,250  | 5,394  | 6,803  | 11     | 468.22 | 404.04 | 509.59 | 6 |
|                               |                    |       |          | 1995   | 5,549  | 3,995  | 6,749  | 12     | 399.49 | 287.61 | 485.88 | 7 |
| 1996                          | 5,420              |       |          | 3,848  | 6,806  | 12     | 372.97 | 264.79 | 468.30 | 8      |        |   |
| 1997                          | 5,371              |       |          | 3,754  | 7,003  | 12     | 354.57 | 247.85 | 462.32 | 9      |        |   |
| 1998                          | 5,394              |       |          | 3,716  | 7,156  | 13     | 342.33 | 235.81 | 454.16 | 11     |        |   |
| 1999                          | 6,089              |       |          | 4,447  | 7,243  | 13     | 373.30 | 272.64 | 444.04 | 8      |        |   |
| 2000                          | 5,692              |       |          | 3,803  | 7,324  | 12     | 336.50 | 224.82 | 432.99 | 11     |        |   |
| 2001                          | 6,571              |       |          | 5,353  | 7,232  | 11     | 374.61 | 305.16 | 412.27 | 9      |        |   |
| 2002                          | 6,136              |       |          | 4,094  | 7,511  | 12     | 336.92 | 224.77 | 412.42 | 11     |        |   |
| 2003                          | 6,407              |       |          | 4,286  | 7,953  | 8      | 339.01 | 226.79 | 420.84 | 11     |        |   |
| 2004                          | 6,813              |       |          | 4,504  | 8,464  | 8      | 346.83 | 229.27 | 430.87 | 11     |        |   |
| 2005                          | 7,143              |       |          | 4,741  | 9,029  | 6      | 351.22 | 233.11 | 443.94 | 11     |        |   |
| 2006                          | 7,508              | 5,002 | 10,113   | 6      | 355.65 | 236.96 | 479.03 | 9      |        |        |        |   |
| 2007                          | 7,909              | 4,611 | 11,410   | 5      | 361.92 | 211.01 | 522.15 | 8      |        |        |        |   |

| Metropolitan Statistical Area | PWID Population | Year   | Number | Min    | Max    | Rank   | Rate   | Min    | Max    | Rank   |    |
|-------------------------------|-----------------|--------|--------|--------|--------|--------|--------|--------|--------|--------|----|
| Philadelphia, PA--NJ          | Male            | 1992   | 38,043 | 34,765 | 39,853 | 3      | 241.26 | 220.47 | 252.74 | 21     |    |
|                               |                 | 1993   | 34,719 | 25,976 | 40,026 | 3      | 219.98 | 164.59 | 253.60 | 24     |    |
|                               |                 | 1994   | 37,412 | 32,284 | 40,718 | 3      | 236.43 | 204.03 | 257.32 | 21     |    |
|                               |                 | 1995   | 34,187 | 24,613 | 41,581 | 3      | 215.34 | 155.03 | 261.91 | 22     |    |
|                               |                 | 1996   | 34,021 | 24,154 | 42,717 | 3      | 213.77 | 151.77 | 268.41 | 19     |    |
|                               |                 | 1997   | 34,008 | 23,772 | 44,343 | 4      | 213.09 | 148.95 | 277.84 | 19     |    |
|                               |                 | 1998   | 34,136 | 23,515 | 45,288 | 4      | 212.89 | 146.65 | 282.43 | 16     |    |
|                               |                 | 1999   | 38,163 | 27,872 | 45,395 | 3      | 236.74 | 172.90 | 281.60 | 13     |    |
|                               |                 | 2000   | 35,006 | 23,388 | 45,043 | 4      | 215.85 | 144.21 | 277.74 | 12     |    |
|                               |                 | 2001   | 39,289 | 32,005 | 43,239 | 3      | 240.65 | 196.04 | 264.84 | 11     |    |
|                               |                 | 2002   | 35,328 | 23,569 | 43,245 | 4      | 214.57 | 143.15 | 262.66 | 14     |    |
|                               |                 | 2003   | 35,161 | 23,522 | 43,648 | 5      | 211.75 | 141.65 | 262.86 | 13     |    |
|                               |                 | 2004   | 35,250 | 23,302 | 43,791 | 5      | 210.40 | 139.09 | 261.38 | 13     |    |
|                               |                 | 2005   | 34,398 | 22,830 | 43,478 | 5      | 203.78 | 135.25 | 257.58 | 15     |    |
|                               |                 | 2006   | 33,138 | 22,079 | 44,633 | 5      | 194.92 | 129.87 | 262.53 | 15     |    |
|                               | 2007            | 31,385 | 18,298 | 45,280 | 5      | 183.51 | 106.99 | 264.74 | 18     |        |    |
|                               |                 | Female | 1992   | 12,674 | 11,582 | 13,277 | 4      | 76.22  | 69.65  | 79.85  | 44 |
|                               |                 |        | 1993   | 12,349 | 9,240  | 14,237 | 7      | 74.22  | 55.53  | 85.57  | 42 |
|                               |                 |        | 1994   | 14,186 | 12,242 | 15,440 | 4      | 85.03  | 73.38  | 92.54  | 39 |
|                               |                 |        | 1995   | 13,770 | 9,914  | 16,749 | 6      | 82.32  | 59.27  | 100.13 | 39 |
|                               |                 |        | 1996   | 14,483 | 10,282 | 18,185 | 5      | 86.32  | 61.28  | 108.38 | 37 |
|                               |                 |        | 1997   | 15,209 | 10,632 | 19,831 | 5      | 90.42  | 63.20  | 117.89 | 29 |
|                               |                 |        | 1998   | 15,934 | 10,976 | 21,139 | 5      | 94.23  | 64.91  | 125.02 | 25 |
|                               |                 |        | 1999   | 18,466 | 13,486 | 21,965 | 4      | 108.58 | 79.30  | 129.16 | 20 |
|                               |                 |        | 2000   | 17,438 | 11,651 | 22,438 | 5      | 101.90 | 68.08  | 131.12 | 18 |
|                               | 2001            |        | 20,013 | 16,303 | 22,025 | 4      | 116.42 | 94.84  | 128.13 | 14     |    |
|                               | 2002            | 18,277 | 12,193 | 22,373 | 5      | 105.64 | 70.48  | 129.32 | 18     |        |    |
|                               | 2003            | 18,354 | 12,278 | 22,784 | 5      | 105.51 | 70.58  | 130.97 | 19     |        |    |
|                               | 2004            | 18,449 | 12,195 | 22,919 | 5      | 105.34 | 69.63  | 130.86 | 19     |        |    |
|                               | 2005            | 17,943 | 11,909 | 22,679 | 5      | 101.84 | 67.59  | 128.73 | 20     |        |    |
|                               | 2006            | 17,139 | 11,419 | 23,084 | 5      | 96.75  | 64.46  | 130.31 | 22     |        |    |
|                               | 2007            | 16,034 | 9,348  | 23,132 | 5      | 90.14  | 52.55  | 130.05 | 23     |        |    |

| Metropolitan Statistical Area | PWID Population | Year   | Number      | Min    | Max    | Rank   | Rate   | Min    | Max    | Rank   |        |    |
|-------------------------------|-----------------|--------|-------------|--------|--------|--------|--------|--------|--------|--------|--------|----|
| Philadelphia, PA--NJ          | Young (15-29)   | 1992   | 11,883      | 10,860 | 12,449 | 4      | 111.23 | 101.65 | 116.53 | 35     |        |    |
|                               |                 | 1993   | 10,849      | 8,117  | 12,507 | 5      | 103.29 | 77.28  | 119.08 | 40     |        |    |
|                               |                 | 1994   | 11,983      | 10,341 | 13,042 | 4      | 115.79 | 99.92  | 126.02 | 29     |        |    |
|                               |                 | 1995   | 11,447      | 8,241  | 13,923 | 4      | 111.95 | 80.60  | 136.17 | 29     |        |    |
|                               |                 | 1996   | 12,088      | 8,582  | 15,178 | 4      | 119.51 | 84.85  | 150.06 | 28     |        |    |
|                               |                 | 1997   | 12,958      | 9,058  | 16,895 | 4      | 128.95 | 90.13  | 168.13 | 23     |        |    |
|                               |                 | 1998   | 14,036      | 9,668  | 18,621 | 4      | 140.45 | 96.75  | 186.33 | 16     |        |    |
|                               |                 | 1999   | 16,976      | 12,398 | 20,193 | 2      | 171.22 | 125.05 | 203.67 | 13     |        |    |
|                               |                 | 2000   | 16,833      | 11,247 | 21,660 | 3      | 170.83 | 114.13 | 219.81 | 14     |        |    |
|                               |                 | 2001   | 20,351      | 16,579 | 22,397 | 1      | 207.58 | 169.10 | 228.45 | 9      |        |    |
|                               |                 | 2002   | 19,601      | 13,077 | 23,994 | 3      | 199.19 | 132.88 | 243.82 | 8      |        |    |
|                               |                 | 2003   | 20,748      | 13,879 | 25,755 | 3      | 209.00 | 139.81 | 259.45 | 8      |        |    |
|                               |                 | 2004   | 21,946      | 14,507 | 27,263 | 3      | 218.56 | 144.48 | 271.52 | 7      |        |    |
|                               |                 | 2005   | 22,409      | 14,873 | 28,324 | 2      | 220.73 | 146.50 | 279.00 | 9      |        |    |
|                               |                 | 2006   | 22,409      | 14,931 | 30,183 | 2      | 218.35 | 145.48 | 294.09 | 9      |        |    |
|                               |                 | 2007   | 21,869      | 12,750 | 31,550 | 2      | 211.53 | 123.33 | 305.18 | 9      |        |    |
|                               |                 |        | Old (30-64) | 1992   | 38,928 | 35,574 | 40,780 | 4      | 179.27 | 163.83 | 187.80 | 29 |
|                               |                 |        |             | 1993   | 36,200 | 27,084 | 41,733 | 3      | 165.17 | 123.57 | 190.41 | 28 |
|                               |                 |        |             | 1994   | 39,547 | 34,126 | 43,041 | 3      | 178.48 | 154.01 | 194.25 | 21 |
|                               |                 |        |             | 1995   | 36,434 | 26,230 | 44,314 | 3      | 162.81 | 117.21 | 198.02 | 27 |
| 1996                          | 36,344          |        |             | 25,803 | 45,633 | 3      | 160.95 | 114.27 | 202.09 | 26     |        |    |
| 1997                          | 36,210          |        |             | 25,311 | 47,214 | 3      | 159.29 | 111.34 | 207.69 | 25     |        |    |
| 1998                          | 36,030          |        |             | 24,819 | 47,801 | 4      | 156.99 | 108.14 | 208.27 | 22     |        |    |
| 1999                          | 39,726          |        |             | 29,014 | 47,254 | 3      | 171.15 | 125.00 | 203.58 | 16     |        |    |
| 2000                          | 35,766          |        |             | 23,896 | 46,021 | 5      | 152.35 | 101.79 | 196.03 | 20     |        |    |
| 2001                          | 39,218          |        |             | 31,948 | 43,161 | 4      | 165.40 | 134.73 | 182.02 | 14     |        |    |
| 2002                          | 34,294          |        |             | 22,879 | 41,979 | 5      | 143.34 | 95.63  | 175.47 | 19     |        |    |
| 2003                          | 33,029          |        |             | 22,095 | 41,001 | 5      | 137.20 | 91.78  | 170.31 | 22     |        |    |
| 2004                          | 31,863          |        |             | 21,063 | 39,583 | 5      | 131.52 | 86.94  | 163.39 | 23     |        |    |
| 2005                          | 29,720          |        |             | 19,725 | 37,566 | 5      | 122.08 | 81.02  | 154.30 | 24     |        |    |
| 2006                          | 27,157          |        |             | 18,094 | 36,578 | 5      | 111.06 | 74.00  | 149.59 | 27     |        |    |
| 2007                          | 24,202          | 14,110 | 34,915      | 5      | 98.57  | 57.47  | 142.21 | 33     |        |        |        |    |



| Metropolitan Statistical Area | PWID Population | Year   | Number             | Min    | Max    | Rank  | Rate   | Min   | Max    | Rank  |        |    |
|-------------------------------|-----------------|--------|--------------------|--------|--------|-------|--------|-------|--------|-------|--------|----|
| Phoenix--Mesa, AZ             | Total           | 1992   | 18,535             | 9,640  | 29,799 | 25    | 120.13 | 62.48 | 193.13 | 46    |        |    |
|                               |                 | 1993   | 17,846             | 9,144  | 28,569 | 25    | 111.51 | 57.14 | 178.51 | 45    |        |    |
|                               |                 | 1994   | 18,110             | 8,793  | 27,847 | 23    | 106.99 | 51.95 | 164.51 | 48    |        |    |
|                               |                 | 1995   | 17,994             | 8,324  | 26,777 | 23    | 101.14 | 46.79 | 150.51 | 50    |        |    |
|                               |                 | 1996   | 17,891             | 7,730  | 25,759 | 22    | 96.48  | 41.69 | 138.92 | 51    |        |    |
|                               |                 | 1997   | 17,911             | 7,558  | 24,694 | 21    | 92.35  | 38.97 | 127.33 | 52    |        |    |
|                               |                 | 1998   | 18,417             | 7,944  | 25,377 | 20    | 91.71  | 39.55 | 126.36 | 53    |        |    |
|                               |                 | 1999   | 18,845             | 8,958  | 26,031 | 19    | 90.78  | 43.15 | 125.39 | 57    |        |    |
|                               |                 | 2000   | 20,259             | 10,495 | 28,297 | 18    | 94.55  | 48.98 | 132.06 | 52    |        |    |
|                               |                 | 2001   | 21,980             | 12,217 | 30,769 | 15    | 99.11  | 55.09 | 138.74 | 52    |        |    |
|                               |                 | 2002   | 22,724             | 13,772 | 33,763 | 16    | 99.13  | 60.08 | 147.29 | 46    |        |    |
|                               |                 | 2003   | 23,878             | 15,055 | 36,770 | 15    | 101.20 | 63.81 | 155.84 | 45    |        |    |
|                               |                 | 2004   | 25,152             | 15,964 | 40,465 | 15    | 103.07 | 65.41 | 165.81 | 42    |        |    |
|                               |                 | 2005   | 26,659             | 16,874 | 44,750 | 13    | 104.72 | 66.28 | 175.78 | 41    |        |    |
|                               |                 | 2006   | 28,240             | 17,852 | 49,324 | 11    | 106.46 | 67.30 | 185.94 | 35    |        |    |
|                               |                 | 2007   | 29,573             | 17,967 | 53,590 | 10    | 108.22 | 65.75 | 196.10 | 34    |        |    |
|                               |                 |        | Non-Hispanic White | 1992   | 13,167 | 6,848 | 21,168 | 14    | 114.31 | 59.45 | 183.77 | 29 |
|                               |                 |        |                    | 1993   | 12,912 | 6,616 | 20,670 | 13    | 109.52 | 56.12 | 175.33 | 32 |
|                               |                 |        |                    | 1994   | 13,105 | 6,363 | 20,151 | 11    | 106.38 | 51.66 | 163.58 | 32 |
|                               |                 |        |                    | 1995   | 12,839 | 5,939 | 19,107 | 12    | 100.45 | 46.47 | 149.49 | 32 |
| 1996                          | 12,438          |        |                    | 5,374  | 17,908 | 12    | 94.73  | 40.93 | 136.39 | 38    |        |    |
| 1997                          | 12,012          |        |                    | 5,068  | 16,560 | 13    | 88.60  | 37.39 | 122.15 | 42    |        |    |
| 1998                          | 11,820          |        |                    | 5,098  | 16,287 | 13    | 85.38  | 36.83 | 117.65 | 44    |        |    |
| 1999                          | 11,520          |        |                    | 5,476  | 15,914 | 15    | 81.64  | 38.81 | 112.78 | 48    |        |    |
| 2000                          | 11,790          |        |                    | 6,108  | 16,468 | 13    | 82.15  | 42.56 | 114.75 | 45    |        |    |
| 2001                          | 12,239          |        |                    | 6,803  | 17,133 | 16    | 83.53  | 46.43 | 116.93 | 44    |        |    |
| 2002                          | 12,248          |        |                    | 7,423  | 18,198 | 11    | 81.86  | 49.61 | 121.63 | 43    |        |    |
| 2003                          | 12,687          |        |                    | 7,999  | 19,537 | 12    | 83.27  | 52.50 | 128.22 | 42    |        |    |
| 2004                          | 13,496          |        |                    | 8,566  | 21,713 | 11    | 86.51  | 54.91 | 139.17 | 41    |        |    |
| 2005                          | 14,850          |        |                    | 9,399  | 24,927 | 11    | 92.44  | 58.51 | 155.16 | 39    |        |    |
| 2006                          | 16,784          | 10,610 | 29,316             | 7      | 101.86 | 64.39 | 177.92 | 31    |        |       |        |    |
| 2007                          | 19,185          | 11,656 | 34,766             | 7      | 114.83 | 69.77 | 208.09 | 24    |        |       |        |    |

| Metropolitan Statistical Area | PWID Population    | Year     | Number | Min    | Max   | Rank   | Rate   | Min    | Max    | Rank   |    |
|-------------------------------|--------------------|----------|--------|--------|-------|--------|--------|--------|--------|--------|----|
| Phoenix--Mesa, AZ             | Non-Hispanic Black | 1992     | 1,427  | 742    | 2,294 | 64     | 271.04 | 140.96 | 435.73 | 54     |    |
|                               |                    | 1993     | 993    | 509    | 1,589 | 73     | 181.23 | 92.86  | 290.12 | 75     |    |
|                               |                    | 1994     | 816    | 396    | 1,255 | 83     | 137.68 | 66.85  | 211.71 | 87     |    |
|                               |                    | 1995     | 729    | 337    | 1,085 | 84     | 115.39 | 53.38  | 171.72 | 91     |    |
|                               |                    | 1996     | 714    | 308    | 1,028 | 83     | 106.26 | 45.91  | 152.99 | 89     |    |
|                               |                    | 1997     | 759    | 320    | 1,046 | 76     | 106.76 | 45.05  | 147.19 | 88     |    |
|                               |                    | 1998     | 879    | 379    | 1,212 | 67     | 118.32 | 51.03  | 163.03 | 80     |    |
|                               |                    | 1999     | 1,059  | 504    | 1,463 | 65     | 136.84 | 65.05  | 189.03 | 74     |    |
|                               |                    | 2000     | 1,377  | 714    | 1,924 | 58     | 170.46 | 88.31  | 238.10 | 52     |    |
|                               |                    | 2001     | 1,826  | 1,015  | 2,556 | 46     | 215.66 | 119.87 | 301.89 | 29     |    |
|                               |                    | 2002     | 2,295  | 1,391  | 3,409 | 31     | 258.16 | 156.46 | 383.57 | 17     |    |
|                               |                    | 2003     | 2,871  | 1,810  | 4,420 | 25     | 309.52 | 195.15 | 476.62 | 13     |    |
|                               |                    | 2004     | 3,481  | 2,209  | 5,600 | 20     | 356.11 | 226.02 | 572.92 | 9      |    |
|                               |                    | 2005     | 4,058  | 2,569  | 6,812 | 18     | 389.09 | 246.28 | 653.12 | 8      |    |
|                               |                    | 2006     | 4,474  | 2,828  | 7,814 | 16     | 398.42 | 251.85 | 695.88 | 9      |    |
|                               | 2007               | 4,568    | 2,775  | 8,278  | 17    | 383.18 | 232.80 | 694.38 | 12     |        |    |
|                               |                    | Hispanic | 1992   | 2,729  | 1,419 | 4,387  | 28     | 97.91  | 50.92  | 157.40 | 61 |
|                               |                    |          | 1993   | 2,861  | 1,466 | 4,580  | 28     | 94.46  | 48.40  | 151.23 | 56 |
|                               |                    |          | 1994   | 3,111  | 1,510 | 4,783  | 27     | 93.51  | 45.41  | 143.80 | 57 |
|                               |                    |          | 1995   | 3,265  | 1,510 | 4,858  | 23     | 89.81  | 41.55  | 133.66 | 52 |
|                               | 1996               |          | 3,387  | 1,463  | 4,876 | 23     | 85.82  | 37.08  | 123.56 | 52     |    |
|                               | 1997               |          | 3,501  | 1,477  | 4,827 | 20     | 81.86  | 34.54  | 112.86 | 53     |    |
|                               | 1998               |          | 3,686  | 1,590  | 5,078 | 19     | 80.15  | 34.57  | 110.43 | 53     |    |
|                               | 1999               |          | 3,835  | 1,823  | 5,297 | 17     | 77.84  | 37.00  | 107.52 | 56     |    |
|                               | 2000               |          | 4,171  | 2,161  | 5,826 | 16     | 79.15  | 41.00  | 110.55 | 51     |    |
|                               | 2001               |          | 4,563  | 2,536  | 6,388 | 17     | 81.16  | 45.11  | 113.62 | 54     |    |
|                               | 2002               | 4,751    | 2,879  | 7,058  | 16    | 79.63  | 48.26  | 118.31 | 48     |        |    |
|                               | 2003               | 5,029    | 3,171  | 7,744  | 15    | 80.11  | 50.51  | 123.37 | 48     |        |    |
|                               | 2004               | 5,349    | 3,395  | 8,606  | 14    | 80.84  | 51.31  | 130.06 | 46     |        |    |
|                               | 2005               | 5,751    | 3,640  | 9,654  | 12    | 81.43  | 51.54  | 136.69 | 46     |        |    |
|                               | 2006               | 6,221    | 3,933  | 10,866 | 12    | 82.45  | 52.12  | 144.01 | 45     |        |    |
|                               | 2007               | 6,712    | 4,078  | 12,162 | 9     | 84.15  | 51.12  | 152.49 | 46     |        |    |

| Metropolitan Statistical Area | PWID Population | Year   | Number | Min    | Max    | Rank   | Rate   | Min    | Max    | Rank   |    |
|-------------------------------|-----------------|--------|--------|--------|--------|--------|--------|--------|--------|--------|----|
| Phoenix--Mesa, AZ             | Male            | 1992   | 12,822 | 6,668  | 20,613 | 23     | 164.98 | 85.80  | 265.23 | 43     |    |
|                               |                 | 1993   | 12,327 | 6,316  | 19,734 | 24     | 152.63 | 78.21  | 244.35 | 41     |    |
|                               |                 | 1994   | 12,521 | 6,080  | 19,253 | 22     | 146.27 | 71.02  | 224.91 | 45     |    |
|                               |                 | 1995   | 12,478 | 5,772  | 18,569 | 20     | 138.41 | 64.03  | 205.97 | 44     |    |
|                               |                 | 1996   | 12,464 | 5,385  | 17,945 | 19     | 132.44 | 57.23  | 190.68 | 47     |    |
|                               |                 | 1997   | 12,552 | 5,296  | 17,305 | 18     | 127.31 | 53.72  | 175.52 | 47     |    |
|                               |                 | 1998   | 12,994 | 5,604  | 17,904 | 18     | 127.12 | 54.83  | 175.16 | 47     |    |
|                               |                 | 1999   | 13,392 | 6,366  | 18,500 | 17     | 126.54 | 60.15  | 174.80 | 48     |    |
|                               |                 | 2000   | 14,505 | 7,514  | 20,260 | 13     | 132.54 | 68.66  | 185.13 | 44     |    |
|                               |                 | 2001   | 15,852 | 8,811  | 22,191 | 13     | 139.76 | 77.69  | 195.65 | 39     |    |
|                               |                 | 2002   | 16,501 | 10,000 | 24,516 | 13     | 140.62 | 85.22  | 208.93 | 40     |    |
|                               |                 | 2003   | 17,444 | 10,998 | 26,861 | 11     | 144.41 | 91.05  | 222.38 | 38     |    |
|                               |                 | 2004   | 18,467 | 11,721 | 29,710 | 11     | 147.71 | 93.75  | 237.63 | 36     |    |
|                               |                 | 2005   | 19,647 | 12,436 | 32,979 | 11     | 150.61 | 95.33  | 252.81 | 32     |    |
|                               | 2006            | 20,858 | 13,185 | 36,431 | 8      | 153.30 | 96.91  | 267.76 | 29     |        |    |
|                               | 2007            | 21,851 | 13,276 | 39,597 | 8      | 155.71 | 94.60  | 282.16 | 28     |        |    |
|                               |                 | Female | 1992   | 6,117  | 3,181  | 9,834  | 26     | 79.88  | 41.54  | 128.42 | 42 |
|                               |                 |        | 1993   | 5,883  | 3,014  | 9,418  | 26     | 74.20  | 38.02  | 118.79 | 43 |
|                               |                 |        | 1994   | 5,940  | 2,884  | 9,133  | 25     | 70.99  | 34.47  | 109.15 | 54 |
|                               |                 |        | 1995   | 5,850  | 2,706  | 8,706  | 26     | 66.66  | 30.84  | 99.20  | 55 |
|                               |                 |        | 1996   | 5,748  | 2,484  | 8,276  | 25     | 62.95  | 27.20  | 90.63  | 58 |
|                               |                 |        | 1997   | 5,671  | 2,393  | 7,818  | 25     | 59.47  | 25.10  | 82.00  | 59 |
|                               |                 |        | 1998   | 5,732  | 2,472  | 7,898  | 24     | 58.13  | 25.07  | 80.09  | 59 |
|                               |                 |        | 1999   | 5,754  | 2,735  | 7,948  | 25     | 56.54  | 26.88  | 78.10  | 65 |
|                               |                 |        | 2000   | 6,058  | 3,138  | 8,462  | 23     | 57.79  | 29.94  | 80.72  | 62 |
|                               |                 |        | 2001   | 6,430  | 3,574  | 9,000  | 21     | 59.34  | 32.98  | 83.06  | 64 |
|                               | 2002            |        | 6,497  | 3,938  | 9,653  | 21     | 58.07  | 35.19  | 86.28  | 62     |    |
|                               | 2003            |        | 6,670  | 4,206  | 10,272 | 21     | 57.93  | 36.52  | 89.20  | 62     |    |
|                               | 2004            | 6,866  | 4,358  | 11,046 | 21     | 57.69  | 36.61  | 92.81  | 61     |        |    |
|                               | 2005            | 7,116  | 4,504  | 11,945 | 19     | 57.33  | 36.29  | 96.23  | 62     |        |    |
|                               | 2006            | 7,380  | 4,665  | 12,890 | 18     | 57.12  | 36.11  | 99.76  | 60     |        |    |
|                               | 2007            | 7,581  | 4,606  | 13,738 | 17     | 57.03  | 34.65  | 103.34 | 58     |        |    |

| Metropolitan Statistical Area | PWID Population | Year        | Number | Min    | Max    | Rank   | Rate   | Min    | Max    | Rank   |    |
|-------------------------------|-----------------|-------------|--------|--------|--------|--------|--------|--------|--------|--------|----|
| Phoenix--Mesa, AZ             | Young (15-29)   | 1992        | 6,168  | 3,208  | 9,915  | 18     | 113.44 | 59.00  | 182.38 | 33     |    |
|                               |                 | 1993        | 5,997  | 3,073  | 9,601  | 17     | 108.15 | 55.42  | 173.15 | 31     |    |
|                               |                 | 1994        | 6,060  | 2,943  | 9,319  | 16     | 104.91 | 50.94  | 161.32 | 37     |    |
|                               |                 | 1995        | 5,931  | 2,744  | 8,826  | 15     | 98.33  | 45.49  | 146.33 | 43     |    |
|                               |                 | 1996        | 5,763  | 2,490  | 8,297  | 16     | 91.88  | 39.70  | 132.29 | 47     |    |
|                               |                 | 1997        | 5,612  | 2,368  | 7,737  | 15     | 85.60  | 36.12  | 118.02 | 51     |    |
|                               |                 | 1998        | 5,605  | 2,418  | 7,723  | 16     | 82.35  | 35.52  | 113.47 | 54     |    |
|                               |                 | 1999        | 5,583  | 2,654  | 7,712  | 16     | 79.30  | 37.70  | 109.54 | 58     |    |
|                               |                 | 2000        | 5,876  | 3,044  | 8,208  | 15     | 80.96  | 41.94  | 113.08 | 57     |    |
|                               |                 | 2001        | 6,303  | 3,504  | 8,824  | 16     | 84.85  | 47.16  | 118.77 | 61     |    |
|                               |                 | 2002        | 6,530  | 3,958  | 9,703  | 14     | 85.81  | 52.01  | 127.50 | 56     |    |
|                               |                 | 2003        | 6,995  | 4,410  | 10,771 | 12     | 90.00  | 56.75  | 138.60 | 57     |    |
|                               |                 | 2004        | 7,665  | 4,865  | 12,331 | 12     | 95.92  | 60.88  | 154.32 | 55     |    |
|                               |                 | 2005        | 8,643  | 5,471  | 14,509 | 11     | 104.39 | 66.07  | 175.23 | 47     |    |
|                               |                 | 2006        | 9,974  | 6,305  | 17,421 | 11     | 116.15 | 73.42  | 202.87 | 36     |    |
|                               | 2007            | 11,639      | 7,071  | 21,091 | 7      | 132.36 | 80.41  | 239.85 | 28     |        |    |
|                               |                 | Old (30-64) | 1992   | 12,672 | 6,591  | 20,373 | 27     | 126.82 | 65.96  | 203.88 | 47 |
|                               |                 |             | 1993   | 12,068 | 6,184  | 19,320 | 26     | 115.39 | 59.12  | 184.72 | 46 |
|                               |                 |             | 1994   | 12,234 | 5,940  | 18,811 | 27     | 109.71 | 53.27  | 168.70 | 53 |
|                               |                 |             | 1995   | 12,235 | 5,660  | 18,208 | 26     | 104.04 | 48.13  | 154.83 | 51 |
|                               |                 |             | 1996   | 12,308 | 5,318  | 17,720 | 25     | 100.30 | 43.34  | 144.41 | 54 |
|                               | 1997            |             | 12,497 | 5,273  | 17,230 | 25     | 97.34  | 41.07  | 134.20 | 57     |    |
|                               | 1998            |             | 13,034 | 5,622  | 17,959 | 23     | 98.17  | 42.34  | 135.27 | 55     |    |
|                               | 1999            |             | 13,499 | 6,417  | 18,647 | 20     | 98.39  | 46.77  | 135.91 | 56     |    |
|                               | 2000            |             | 14,632 | 7,580  | 20,437 | 19     | 103.27 | 53.50  | 144.25 | 46     |    |
|                               | 2001            |             | 15,916 | 8,847  | 22,281 | 16     | 107.92 | 59.98  | 151.07 | 46     |    |
|                               | 2002            | 16,378      | 9,926  | 24,334 | 17     | 106.95 | 64.82  | 158.91 | 41     |        |    |
|                               | 2003            | 16,967      | 10,697 | 26,127 | 17     | 107.23 | 67.61  | 165.13 | 37     |        |    |
|                               | 2004            | 17,399      | 11,043 | 27,992 | 15     | 106.00 | 67.28  | 170.54 | 35     |        |    |
|                               | 2005            | 17,644      | 11,168 | 29,617 | 15     | 102.72 | 65.02  | 172.42 | 36     |        |    |
|                               | 2006            | 17,445      | 11,028 | 30,469 | 14     | 97.24  | 61.47  | 169.85 | 37     |        |    |
|                               | 2007            | 16,453      | 9,996  | 29,815 | 13     | 88.77  | 53.93  | 160.87 | 39     |        |    |

| Metropolitan Statistical Area | PWID Population | Year  | Number             | Min    | Max    | Rank  | Rate   | Min   | Max    | Rank  |       |    |
|-------------------------------|-----------------|-------|--------------------|--------|--------|-------|--------|-------|--------|-------|-------|----|
| Pittsburgh, PA                | Total           | 1992  | 11,831             | 5,213  | 16,456 | 39    | 76.89  | 33.88 | 106.95 | 75    |       |    |
|                               |                 | 1993  | 10,794             | 5,730  | 16,336 | 41    | 70.31  | 37.32 | 106.41 | 75    |       |    |
|                               |                 | 1994  | 12,144             | 6,356  | 16,201 | 38    | 79.37  | 41.55 | 105.89 | 74    |       |    |
|                               |                 | 1995  | 10,851             | 6,481  | 16,062 | 39    | 71.19  | 42.52 | 105.37 | 72    |       |    |
|                               |                 | 1996  | 10,939             | 6,126  | 15,971 | 35    | 71.95  | 40.30 | 105.05 | 72    |       |    |
|                               |                 | 1997  | 11,121             | 6,184  | 15,868 | 35    | 73.40  | 40.81 | 104.72 | 67    |       |    |
|                               |                 | 1998  | 11,545             | 6,852  | 15,750 | 33    | 76.39  | 45.34 | 104.21 | 66    |       |    |
|                               |                 | 1999  | 13,463             | 10,742 | 15,647 | 33    | 89.22  | 71.19 | 103.70 | 58    |       |    |
|                               |                 | 2000  | 12,723             | 9,730  | 15,358 | 32    | 84.40  | 64.55 | 101.89 | 58    |       |    |
|                               |                 | 2001  | 13,996             | 12,779 | 15,090 | 31    | 92.82  | 84.75 | 100.08 | 55    |       |    |
|                               |                 | 2002  | 13,845             | 12,511 | 14,647 | 30    | 91.71  | 82.87 | 97.02  | 53    |       |    |
|                               |                 | 2003  | 14,310             | 12,236 | 16,528 | 27    | 94.72  | 80.99 | 109.40 | 48    |       |    |
|                               |                 | 2004  | 14,644             | 11,404 | 19,080 | 27    | 96.96  | 75.51 | 126.33 | 46    |       |    |
|                               |                 | 2005  | 14,782             | 10,572 | 20,843 | 27    | 97.90  | 70.02 | 138.05 | 46    |       |    |
|                               |                 | 2006  | 14,699             | 9,658  | 21,812 | 27    | 97.34  | 63.96 | 144.45 | 43    |       |    |
|                               |                 | 2007  | 14,611             | 8,753  | 22,724 | 26    | 96.65  | 57.91 | 150.33 | 43    |       |    |
|                               |                 |       | Non-Hispanic White | 1992   | 6,653  | 2,932 | 9,254  | 35    | 47.56  | 20.96 | 66.16 | 78 |
|                               |                 |       |                    | 1993   | 5,784  | 3,070 | 8,754  | 37    | 41.51  | 22.03 | 62.82 | 81 |
|                               |                 |       |                    | 1994   | 6,374  | 3,336 | 8,503  | 33    | 45.96  | 24.06 | 61.32 | 79 |
|                               |                 |       |                    | 1995   | 5,716  | 3,414 | 8,461  | 35    | 41.44  | 24.75 | 61.34 | 78 |
| 1996                          | 5,898           |       |                    | 3,303  | 8,612  | 34    | 42.95  | 24.05 | 62.70  | 78    |       |    |
| 1997                          | 6,224           |       |                    | 3,461  | 8,880  | 31    | 45.54  | 25.32 | 64.98  | 73    |       |    |
| 1998                          | 6,760           |       |                    | 4,012  | 9,222  | 29    | 49.67  | 29.48 | 67.76  | 71    |       |    |
| 1999                          | 8,272           |       |                    | 6,600  | 9,613  | 24    | 60.99  | 48.66 | 70.88  | 61    |       |    |
| 2000                          | 8,191           |       |                    | 6,264  | 9,888  | 24    | 60.59  | 46.34 | 73.14  | 61    |       |    |
| 2001                          | 9,400           |       |                    | 8,582  | 10,135 | 20    | 69.64  | 63.58 | 75.08  | 58    |       |    |
| 2002                          | 9,635           |       |                    | 8,707  | 10,193 | 20    | 71.43  | 64.55 | 75.57  | 55    |       |    |
| 2003                          | 10,232          |       |                    | 8,750  | 11,819 | 20    | 75.98  | 64.97 | 87.76  | 51    |       |    |
| 2004                          | 10,659          |       |                    | 8,301  | 13,888 | 20    | 79.29  | 61.75 | 103.31 | 47    |       |    |
| 2005                          | 10,835          |       |                    | 7,749  | 15,278 | 19    | 80.75  | 57.75 | 113.86 | 46    |       |    |
| 2006                          | 10,717          |       |                    | 7,042  | 15,902 | 19    | 80.00  | 52.57 | 118.72 | 46    |       |    |
| 2007                          | 10,438          | 6,253 | 16,234             | 20     | 78.02  | 46.74 | 121.35 | 48    |        |       |       |    |

| Metropolitan Statistical Area | PWID Population    | Year | Number   | Min   | Max   | Rank  | Rate   | Min    | Max    | Rank  |        |    |
|-------------------------------|--------------------|------|----------|-------|-------|-------|--------|--------|--------|-------|--------|----|
| Pittsburgh, PA                | Non-Hispanic Black | 1992 | 4,646    | 2,047 | 6,463 | 23    | 405.06 | 178.49 | 563.43 | 29    |        |    |
|                               |                    | 1993 | 4,489    | 2,383 | 6,793 | 22    | 389.34 | 206.67 | 589.22 | 28    |        |    |
|                               |                    | 1994 | 5,138    | 2,690 | 6,855 | 21    | 443.97 | 232.39 | 592.32 | 16    |        |    |
|                               |                    | 1995 | 4,522    | 2,701 | 6,694 | 23    | 388.61 | 232.10 | 575.21 | 16    |        |    |
|                               |                    | 1996 | 4,368    | 2,446 | 6,377 | 22    | 373.30 | 209.07 | 545.02 | 15    |        |    |
|                               |                    | 1997 | 4,153    | 2,310 | 5,926 | 22    | 352.86 | 196.21 | 503.46 | 15    |        |    |
|                               |                    | 1998 | 3,952    | 2,345 | 5,391 | 22    | 334.20 | 198.34 | 455.91 | 16    |        |    |
|                               |                    | 1999 | 4,157    | 3,317 | 4,831 | 22    | 349.15 | 278.57 | 405.78 | 13    |        |    |
|                               |                    | 2000 | 3,509    | 2,684 | 4,236 | 22    | 292.63 | 223.78 | 353.24 | 15    |        |    |
|                               |                    | 2001 | 3,440    | 3,141 | 3,709 | 22    | 284.89 | 260.10 | 307.14 | 16    |        |    |
|                               |                    | 2002 | 3,053    | 2,758 | 3,229 | 23    | 250.17 | 226.07 | 264.66 | 21    |        |    |
|                               |                    | 2003 | 2,877    | 2,460 | 3,323 | 24    | 233.12 | 199.34 | 269.26 | 21    |        |    |
|                               |                    | 2004 | 2,757    | 2,147 | 3,593 | 25    | 221.75 | 172.68 | 288.92 | 23    |        |    |
|                               |                    | 2005 | 2,705    | 1,935 | 3,815 | 25    | 216.08 | 154.54 | 304.68 | 24    |        |    |
|                               |                    | 2006 | 2,740    | 1,800 | 4,066 | 27    | 217.00 | 142.59 | 322.01 | 25    |        |    |
|                               |                    | 2007 | 2,928    | 1,754 | 4,555 | 27    | 228.78 | 137.06 | 355.83 | 25    |        |    |
|                               |                    |      | Hispanic | 1992  | 101   | 45    | 141    | 76     | 109.86 | 48.41 | 152.81 | 59 |
|                               |                    |      |          | 1993  | 107   | 57    | 162    | 75     | 113.79 | 60.41 | 172.22 | 51 |
|                               |                    |      |          | 1994  | 130   | 68    | 173    | 74     | 134.77 | 70.54 | 179.80 | 42 |
|                               |                    |      |          | 1995  | 117   | 70    | 173    | 75     | 119.20 | 71.20 | 176.44 | 43 |
| 1996                          | 113                |      |          | 63    | 164   | 76    | 111.14 | 62.25  | 162.26 | 44    |        |    |
| 1997                          | 105                |      |          | 59    | 150   | 77    | 101.91 | 56.67  | 145.40 | 45    |        |    |
| 1998                          | 98                 |      |          | 58    | 134   | 78    | 92.85  | 55.11  | 126.67 | 47    |        |    |
| 1999                          | 102                |      |          | 81    | 118   | 79    | 94.11  | 75.09  | 109.37 | 43    |        |    |
| 2000                          | 86                 |      |          | 65    | 103   | 81    | 75.03  | 57.38  | 90.57  | 54    |        |    |
| 2001                          | 85                 |      |          | 78    | 92    | 84    | 69.89  | 63.81  | 75.35  | 59    |        |    |
| 2002                          | 78                 |      |          | 71    | 83    | 84    | 60.61  | 54.77  | 64.12  | 61    |        |    |
| 2003                          | 79                 |      |          | 67    | 91    | 86    | 57.99  | 49.59  | 66.98  | 62    |        |    |
| 2004                          | 83                 |      |          | 65    | 108   | 85    | 58.65  | 45.67  | 76.41  | 60    |        |    |
| 2005                          | 93                 |      |          | 67    | 131   | 84    | 63.25  | 45.23  | 89.18  | 59    |        |    |
| 2006                          | 112                | 73   | 166      | 83    | 72.34 | 47.54 | 107.35 | 54     |        |       |        |    |
| 2007                          | 149                | 89   | 231      | 79    | 90.96 | 54.50 | 141.48 | 42     |        |       |        |    |

| Metropolitan Statistical Area | PWID Population | Year   | Number | Min    | Max    | Rank   | Rate   | Min    | Max    | Rank  |    |
|-------------------------------|-----------------|--------|--------|--------|--------|--------|--------|--------|--------|-------|----|
| Pittsburgh, PA                | Male            | 1992   | 7,823  | 3,447  | 10,881 | 39     | 104.76 | 46.16  | 145.71 | 74    |    |
|                               |                 | 1993   | 7,065  | 3,750  | 10,692 | 39     | 94.71  | 50.28  | 143.34 | 74    |    |
|                               |                 | 1994   | 7,878  | 4,124  | 10,511 | 39     | 105.84 | 55.40  | 141.20 | 72    |    |
|                               |                 | 1995   | 6,986  | 4,173  | 10,341 | 40     | 94.10  | 56.20  | 139.29 | 74    |    |
|                               |                 | 1996   | 6,996  | 3,919  | 10,215 | 38     | 94.43  | 52.89  | 137.87 | 72    |    |
|                               |                 | 1997   | 7,073  | 3,933  | 10,092 | 35     | 95.67  | 53.20  | 136.51 | 67    |    |
|                               |                 | 1998   | 7,306  | 4,336  | 9,967  | 35     | 98.96  | 58.73  | 135.00 | 64    |    |
|                               |                 | 1999   | 8,482  | 6,768  | 9,858  | 33     | 114.94 | 91.71  | 133.58 | 58    |    |
|                               |                 | 2000   | 7,983  | 6,105  | 9,637  | 33     | 108.19 | 82.73  | 130.59 | 56    |    |
|                               |                 | 2001   | 8,748  | 7,987  | 9,431  | 32     | 118.40 | 108.10 | 127.64 | 56    |    |
|                               |                 | 2002   | 8,619  | 7,789  | 9,119  | 32     | 116.33 | 105.13 | 123.07 | 54    |    |
|                               |                 | 2003   | 8,871  | 7,586  | 10,246 | 29     | 119.47 | 102.16 | 137.99 | 47    |    |
|                               |                 | 2004   | 9,036  | 7,037  | 11,773 | 28     | 121.60 | 94.69  | 158.43 | 45    |    |
|                               |                 | 2005   | 9,072  | 6,488  | 12,792 | 26     | 122.02 | 87.27  | 172.05 | 45    |    |
|                               | 2006            | 8,964  | 5,890  | 13,302 | 28     | 120.38 | 79.10  | 178.62 | 47     |       |    |
|                               | 2007            | 8,844  | 5,298  | 13,755 | 27     | 118.44 | 70.96  | 184.21 | 47     |       |    |
|                               |                 | Female | 1992   | 4,193  | 1,848  | 5,833  | 38     | 52.95  | 23.33  | 73.66 | 71 |
|                               |                 |        | 1993   | 3,810  | 2,022  | 5,765  | 36     | 48.27  | 25.62  | 73.05 | 74 |
|                               |                 |        | 1994   | 4,303  | 2,253  | 5,741  | 37     | 54.78  | 28.67  | 73.08 | 73 |
|                               |                 |        | 1995   | 3,888  | 2,322  | 5,755  | 37     | 49.73  | 29.70  | 73.60 | 75 |
|                               |                 |        | 1996   | 3,984  | 2,231  | 5,817  | 35     | 51.12  | 28.63  | 74.63 | 71 |
|                               |                 |        | 1997   | 4,134  | 2,299  | 5,899  | 34     | 53.28  | 29.63  | 76.01 | 67 |
|                               |                 |        | 1998   | 4,391  | 2,606  | 5,990  | 34     | 56.79  | 33.71  | 77.48 | 62 |
|                               |                 |        | 1999   | 5,244  | 4,184  | 6,094  | 29     | 68.02  | 54.27  | 79.05 | 55 |
|                               |                 |        | 2000   | 5,074  | 3,880  | 6,124  | 27     | 65.94  | 50.42  | 79.59 | 55 |
|                               |                 |        | 2001   | 5,705  | 5,209  | 6,151  | 23     | 74.19  | 67.74  | 79.99 | 51 |
|                               | 2002            |        | 5,753  | 5,199  | 6,086  | 23     | 74.83  | 67.62  | 79.16  | 42    |    |
|                               | 2003            |        | 6,037  | 5,162  | 6,973  | 22     | 78.59  | 67.20  | 90.77  | 37    |    |
|                               | 2004            | 6,243  | 4,861  | 8,133  | 22     | 81.36  | 63.36  | 106.01 | 32     |       |    |
|                               | 2005            | 6,328  | 4,525  | 8,922  | 22     | 82.57  | 59.05  | 116.42 | 29     |       |    |
|                               | 2006            | 6,273  | 4,122  | 9,308  | 22     | 81.96  | 53.86  | 121.63 | 32     |       |    |
|                               | 2007            | 6,164  | 3,693  | 9,586  | 22     | 80.57  | 48.27  | 125.32 | 31     |       |    |

| Metropolitan Statistical Area | PWID Population | Year        | Number | Min    | Max    | Rank   | Rate   | Min    | Max    | Rank   |    |
|-------------------------------|-----------------|-------------|--------|--------|--------|--------|--------|--------|--------|--------|----|
| Pittsburgh, PA                | Young (15-29)   | 1992        | 2,723  | 1,200  | 3,788  | 42     | 58.36  | 25.71  | 81.17  | 74     |    |
|                               |                 | 1993        | 1,890  | 1,003  | 2,860  | 52     | 41.20  | 21.87  | 62.36  | 81     |    |
|                               |                 | 1994        | 1,809  | 947    | 2,413  | 61     | 40.17  | 21.03  | 53.60  | 87     |    |
|                               |                 | 1995        | 1,531  | 915    | 2,267  | 66     | 34.55  | 20.64  | 51.15  | 89     |    |
|                               |                 | 1996        | 1,607  | 900    | 2,346  | 64     | 36.73  | 20.57  | 53.62  | 88     |    |
|                               |                 | 1997        | 1,832  | 1,019  | 2,613  | 59     | 42.38  | 23.57  | 60.47  | 85     |    |
|                               |                 | 1998        | 2,249  | 1,335  | 3,068  | 48     | 52.60  | 31.21  | 71.75  | 73     |    |
|                               |                 | 1999        | 3,197  | 2,551  | 3,716  | 34     | 76.04  | 60.67  | 88.37  | 60     |    |
|                               |                 | 2000        | 3,714  | 2,840  | 4,484  | 32     | 89.64  | 68.55  | 108.21 | 52     |    |
|                               |                 | 2001        | 4,965  | 4,533  | 5,353  | 22     | 120.96 | 110.44 | 130.41 | 34     |    |
|                               |                 | 2002        | 5,812  | 5,252  | 6,148  | 19     | 141.84 | 128.18 | 150.06 | 24     |    |
|                               |                 | 2003        | 6,855  | 5,861  | 7,918  | 14     | 166.56 | 142.42 | 192.38 | 18     |    |
|                               |                 | 2004        | 7,689  | 5,988  | 10,018 | 11     | 186.14 | 144.95 | 242.51 | 15     |    |
|                               |                 | 2005        | 8,156  | 5,833  | 11,501 | 12     | 196.17 | 140.30 | 276.61 | 14     |    |
|                               | 2006            | 8,147       | 5,354  | 12,090 | 12     | 194.67 | 127.91 | 288.86 | 15     |        |    |
|                               | 2007            | 7,710       | 4,619  | 11,991 | 13     | 182.81 | 109.52 | 284.33 | 15     |        |    |
|                               |                 | Old (30-64) | 1992   | 9,344  | 4,118  | 12,998 | 37     | 87.17  | 38.41  | 121.25 | 74 |
|                               |                 |             | 1993   | 8,992  | 4,773  | 13,608 | 36     | 83.52  | 44.34  | 126.40 | 72 |
|                               |                 |             | 1994   | 10,371 | 5,428  | 13,836 | 35     | 96.04  | 50.27  | 128.13 | 63 |
|                               |                 |             | 1995   | 9,336  | 5,576  | 13,819 | 34     | 86.35  | 51.58  | 127.82 | 68 |
|                               |                 |             | 1996   | 9,358  | 5,241  | 13,663 | 32     | 86.42  | 48.40  | 126.17 | 66 |
|                               |                 |             | 1997   | 9,348  | 5,198  | 13,338 | 31     | 86.31  | 48.00  | 123.15 | 61 |
|                               |                 |             | 1998   | 9,414  | 5,587  | 12,843 | 31     | 86.86  | 51.55  | 118.50 | 60 |
|                               |                 |             | 1999   | 10,497 | 8,375  | 12,199 | 29     | 96.44  | 76.94  | 112.08 | 57 |
|                               |                 |             | 2000   | 9,334  | 7,138  | 11,267 | 31     | 85.39  | 65.30  | 103.08 | 60 |
|                               |                 |             | 2001   | 9,507  | 8,680  | 10,250 | 31     | 86.64  | 79.10  | 93.41  | 59 |
|                               | 2002            |             | 8,595  | 7,767  | 9,093  | 34     | 78.14  | 70.61  | 82.66  | 57     |    |
|                               | 2003            |             | 8,071  | 6,901  | 9,322  | 34     | 73.43  | 62.79  | 84.81  | 61     |    |
|                               | 2004            | 7,542       | 5,873  | 9,827  | 36     | 68.74  | 53.53  | 89.56  | 63     |        |    |
|                               | 2005            | 7,084       | 5,067  | 9,989  | 36     | 64.75  | 46.31  | 91.30  | 65     |        |    |
|                               | 2006            | 6,779       | 4,454  | 10,059 | 35     | 62.11  | 40.81  | 92.16  | 67     |        |    |
|                               | 2007            | 6,794       | 4,070  | 10,566 | 35     | 62.33  | 37.34  | 96.95  | 66     |        |    |



| Metropolitan Statistical Area | PWID Population | Year   | Number             | Min    | Max    | Rank   | Rate   | Min    | Max    | Rank   |
|-------------------------------|-----------------|--------|--------------------|--------|--------|--------|--------|--------|--------|--------|
| Portland--Vancouver, OR--WA   | Total           | 1992   | 21,661             | 17,170 | 25,773 | 20     | 202.30 | 160.36 | 240.71 | 15     |
|                               |                 | 1993   | 24,273             | 17,910 | 33,996 | 15     | 219.37 | 161.87 | 307.24 | 7      |
|                               |                 | 1994   | 20,264             | 18,558 | 22,091 | 21     | 178.39 | 163.37 | 194.47 | 17     |
|                               |                 | 1995   | 23,114             | 19,065 | 33,889 | 15     | 197.79 | 163.14 | 289.98 | 9      |
|                               |                 | 1996   | 22,831             | 18,198 | 33,807 | 15     | 189.04 | 150.67 | 279.91 | 9      |
|                               |                 | 1997   | 22,641             | 17,155 | 33,363 | 15     | 182.41 | 138.21 | 268.80 | 9      |
|                               |                 | 1998   | 22,699             | 16,554 | 32,694 | 15     | 178.91 | 130.48 | 257.68 | 9      |
|                               |                 | 1999   | 19,699             | 15,874 | 22,131 | 18     | 152.31 | 122.74 | 171.12 | 20     |
|                               |                 | 2000   | 23,005             | 16,599 | 30,468 | 14     | 174.66 | 126.03 | 231.33 | 8      |
|                               |                 | 2001   | 21,401             | 17,444 | 23,513 | 17     | 158.66 | 129.32 | 174.31 | 16     |
|                               |                 | 2002   | 23,344             | 19,341 | 26,276 | 15     | 169.49 | 140.42 | 190.77 | 8      |
|                               |                 | 2003   | 23,296             | 21,155 | 24,791 | 16     | 166.86 | 151.53 | 177.57 | 9      |
|                               |                 | 2004   | 23,158             | 21,295 | 25,299 | 16     | 164.06 | 150.86 | 179.22 | 11     |
|                               |                 | 2005   | 23,021             | 18,818 | 26,004 | 16     | 160.14 | 130.90 | 180.89 | 13     |
|                               |                 | 2006   | 22,923             | 16,279 | 26,851 | 16     | 156.23 | 110.94 | 182.99 | 14     |
|                               |                 | 2007   | 22,797             | 13,643 | 28,939 | 16     | 152.44 | 91.23  | 193.51 | 17     |
|                               |                 |        | Non-Hispanic White | 1992   | 15,441 | 12,240 | 18,373 | 8      | 162.64 | 128.92 |
| 1993                          | 17,424          |        |                    | 12,856 | 24,403 | 7      | 178.65 | 131.82 | 250.21 | 8      |
| 1994                          | 14,613          |        |                    | 13,383 | 15,930 | 8      | 146.92 | 134.56 | 160.17 | 19     |
| 1995                          | 16,710          |        |                    | 13,783 | 24,499 | 6      | 164.62 | 135.78 | 241.36 | 8      |
| 1996                          | 16,517          |        |                    | 13,166 | 24,458 | 5      | 158.59 | 126.41 | 234.83 | 7      |
| 1997                          | 16,365          |        |                    | 12,400 | 24,115 | 5      | 154.08 | 116.75 | 227.05 | 9      |
| 1998                          | 16,368          |        |                    | 11,937 | 23,575 | 5      | 152.00 | 110.85 | 218.93 | 8      |
| 1999                          | 14,151          |        |                    | 11,403 | 15,898 | 7      | 130.07 | 104.82 | 146.13 | 20     |
| 2000                          | 16,441          |        |                    | 11,863 | 21,774 | 6      | 149.63 | 107.96 | 198.17 | 7      |
| 2001                          | 15,197          |        |                    | 12,387 | 16,697 | 7      | 135.80 | 110.69 | 149.20 | 15     |
| 2002                          | 16,452          |        |                    | 13,631 | 18,518 | 6      | 144.66 | 119.86 | 162.83 | 9      |
| 2003                          | 16,275          |        |                    | 14,779 | 17,320 | 6      | 141.78 | 128.74 | 150.88 | 11     |
| 2004                          | 16,021          |        |                    | 14,732 | 17,502 | 6      | 138.58 | 127.43 | 151.39 | 11     |
| 2005                          | 15,756          | 12,879 | 17,798             | 8      | 134.49 | 109.94 | 151.92 | 12     |        |        |
| 2006                          | 15,507          | 11,012 | 18,164             | 9      | 130.38 | 92.59  | 152.72 | 12     |        |        |
| 2007                          | 15,232          | 9,115  | 19,335             | 9      | 126.34 | 75.60  | 160.37 | 19     |        |        |

| Metropolitan Statistical Area | PWID Population    | Year | Number   | Min   | Max   | Rank  | Rate    | Min    | Max     | Rank   |        |    |
|-------------------------------|--------------------|------|----------|-------|-------|-------|---------|--------|---------|--------|--------|----|
| Portland--Vancouver, OR--WA   | Non-Hispanic Black | 1992 | 3,055    | 2,422 | 3,635 | 37    | 1104.49 | 875.51 | 1314.17 | 1      |        |    |
|                               |                    | 1993 | 3,233    | 2,386 | 4,528 | 29    | 1124.72 | 829.89 | 1575.23 | 1      |        |    |
|                               |                    | 1994 | 2,529    | 2,316 | 2,757 | 42    | 840.63  | 769.87 | 916.40  | 2      |        |    |
|                               |                    | 1995 | 2,688    | 2,217 | 3,941 | 34    | 853.22  | 703.75 | 1250.94 | 2      |        |    |
|                               |                    | 1996 | 2,466    | 1,966 | 3,652 | 36    | 748.22  | 596.38 | 1107.91 | 2      |        |    |
|                               |                    | 1997 | 2,271    | 1,721 | 3,346 | 35    | 670.53  | 508.05 | 988.07  | 3      |        |    |
|                               |                    | 1998 | 2,119    | 1,545 | 3,052 | 38    | 605.18  | 441.36 | 871.66  | 3      |        |    |
|                               |                    | 1999 | 1,721    | 1,387 | 1,934 | 51    | 478.78  | 385.82 | 537.89  | 5      |        |    |
|                               |                    | 2000 | 1,896    | 1,368 | 2,512 | 43    | 510.95  | 368.68 | 676.71  | 4      |        |    |
|                               |                    | 2001 | 1,684    | 1,372 | 1,850 | 49    | 441.50  | 359.86 | 485.06  | 7      |        |    |
|                               |                    | 2002 | 1,778    | 1,473 | 2,001 | 44    | 453.21  | 375.50 | 510.13  | 5      |        |    |
|                               |                    | 2003 | 1,747    | 1,587 | 1,859 | 42    | 436.65  | 396.52 | 464.68  | 5      |        |    |
|                               |                    | 2004 | 1,746    | 1,605 | 1,907 | 41    | 429.94  | 395.36 | 469.69  | 7      |        |    |
|                               |                    | 2005 | 1,787    | 1,461 | 2,019 | 37    | 428.64  | 350.38 | 484.18  | 7      |        |    |
|                               |                    | 2006 | 1,883    | 1,338 | 2,206 | 36    | 437.20  | 310.47 | 512.11  | 7      |        |    |
|                               |                    | 2007 | 2,046    | 1,225 | 2,598 | 34    | 461.59  | 276.23 | 585.94  | 7      |        |    |
|                               |                    |      | Hispanic | 1992  | 835   | 662   | 993     | 43     | 201.09  | 159.40 | 239.27 | 32 |
|                               |                    |      |          | 1993  | 902   | 666   | 1,263   | 39     | 194.22  | 143.31 | 272.02 | 34 |
|                               |                    |      |          | 1994  | 736   | 674   | 803     | 45     | 141.96  | 130.01 | 154.76 | 39 |
|                               |                    |      |          | 1995  | 831   | 686   | 1,219   | 43     | 142.64  | 117.65 | 209.13 | 38 |
| 1996                          | 822                |      |          | 656   | 1,218 | 44    | 127.07  | 101.28 | 188.15  | 39     |        |    |
| 1997                          | 825                |      |          | 625   | 1,216 | 45    | 114.19  | 86.52  | 168.26  | 40     |        |    |
| 1998                          | 844                |      |          | 616   | 1,216 | 46    | 106.12  | 77.40  | 152.85  | 40     |        |    |
| 1999                          | 753                |      |          | 607   | 846   | 49    | 86.12   | 69.40  | 96.76   | 53     |        |    |
| 2000                          | 911                |      |          | 657   | 1,206 | 46    | 96.05   | 69.31  | 127.22  | 45     |        |    |
| 2001                          | 882                |      |          | 719   | 969   | 46    | 86.77   | 70.73  | 95.33   | 47     |        |    |
| 2002                          | 1,007              |      |          | 834   | 1,134 | 46    | 93.38   | 77.37  | 105.11  | 44     |        |    |
| 2003                          | 1,056              |      |          | 959   | 1,124 | 47    | 93.72   | 85.11  | 99.74   | 43     |        |    |
| 2004                          | 1,108              |      |          | 1,019 | 1,210 | 47    | 94.25   | 86.67  | 102.97  | 42     |        |    |
| 2005                          | 1,166              |      |          | 953   | 1,318 | 48    | 93.99   | 76.83  | 106.17  | 42     |        |    |
| 2006                          | 1,235              | 877  | 1,446    | 45    | 94.19 | 66.89 | 110.33  | 42     |         |        |        |    |
| 2007                          | 1,310              | 784  | 1,663    | 44    | 94.49 | 56.55 | 119.95  | 40     |         |        |        |    |

| Metropolitan Statistical Area | PWID Population | Year   | Number | Min    | Max    | Rank   | Rate   | Min    | Max    | Rank   |    |
|-------------------------------|-----------------|--------|--------|--------|--------|--------|--------|--------|--------|--------|----|
| Portland--Vancouver, OR--WA   | Male            | 1992   | 12,287 | 9,739  | 14,619 | 25     | 229.41 | 181.85 | 272.96 | 24     |    |
|                               |                 | 1993   | 14,035 | 10,356 | 19,657 | 17     | 253.18 | 186.81 | 354.59 | 14     |    |
|                               |                 | 1994   | 11,881 | 10,881 | 12,952 | 24     | 208.53 | 190.98 | 227.33 | 27     |    |
|                               |                 | 1995   | 13,682 | 11,285 | 20,060 | 16     | 233.17 | 192.32 | 341.86 | 15     |    |
|                               |                 | 1996   | 13,595 | 10,836 | 20,130 | 16     | 223.94 | 178.50 | 331.60 | 16     |    |
|                               |                 | 1997   | 13,521 | 10,245 | 19,924 | 16     | 216.53 | 164.06 | 319.07 | 16     |    |
|                               |                 | 1998   | 13,562 | 9,891  | 19,534 | 16     | 212.29 | 154.82 | 305.77 | 17     |    |
|                               |                 | 1999   | 11,755 | 9,472  | 13,206 | 19     | 180.27 | 145.27 | 202.53 | 31     |    |
|                               |                 | 2000   | 13,691 | 9,879  | 18,133 | 17     | 205.97 | 148.62 | 272.78 | 16     |    |
|                               |                 | 2001   | 12,694 | 10,347 | 13,946 | 18     | 186.52 | 152.03 | 204.92 | 24     |    |
|                               |                 | 2002   | 13,797 | 11,431 | 15,530 | 17     | 198.52 | 164.48 | 223.46 | 18     |    |
|                               |                 | 2003   | 13,725 | 12,464 | 14,606 | 16     | 194.85 | 176.95 | 207.36 | 18     |    |
|                               |                 | 2004   | 13,613 | 12,518 | 14,872 | 16     | 191.21 | 175.83 | 208.88 | 17     |    |
|                               |                 | 2005   | 13,524 | 11,055 | 15,277 | 16     | 186.47 | 152.43 | 210.63 | 17     |    |
|                               |                 | 2006   | 13,486 | 9,577  | 15,797 | 16     | 182.20 | 129.39 | 213.42 | 19     |    |
|                               | 2007            | 13,467 | 8,059  | 17,095 | 17     | 178.54 | 106.85 | 226.64 | 20     |        |    |
|                               |                 | Female | 1992   | 7,693  | 6,098  | 9,153  | 18     | 143.75 | 113.95 | 171.04 | 14 |
|                               |                 |        | 1993   | 8,835  | 6,519  | 12,375 | 15     | 160.02 | 118.07 | 224.12 | 5  |
|                               |                 |        | 1994   | 7,546  | 6,911  | 8,226  | 17     | 133.27 | 122.06 | 145.29 | 16 |
|                               |                 |        | 1995   | 8,787  | 7,247  | 12,883 | 17     | 151.02 | 124.56 | 221.41 | 8  |
|                               |                 |        | 1996   | 8,840  | 7,046  | 13,090 | 16     | 147.17 | 117.31 | 217.92 | 9  |
|                               |                 |        | 1997   | 8,909  | 6,750  | 13,127 | 16     | 144.44 | 109.44 | 212.85 | 8  |
|                               |                 |        | 1998   | 9,053  | 6,602  | 13,039 | 16     | 143.72 | 104.81 | 207.00 | 8  |
|                               |                 |        | 1999   | 7,942  | 6,400  | 8,923  | 17     | 123.84 | 99.80  | 139.13 | 13 |
|                               |                 |        | 2000   | 9,349  | 6,746  | 12,382 | 12     | 143.31 | 103.41 | 189.80 | 8  |
|                               | 2001            |        | 8,741  | 7,125  | 9,603  | 14     | 130.79 | 106.61 | 143.70 | 9      |    |
|                               | 2002            | 9,552  | 7,914  | 10,752 | 13     | 139.98 | 115.98 | 157.56 | 8      |        |    |
|                               | 2003            | 9,517  | 8,643  | 10,128 | 13     | 137.59 | 124.94 | 146.42 | 8      |        |    |
|                               | 2004            | 9,412  | 8,655  | 10,283 | 13     | 134.54 | 123.72 | 146.98 | 8      |        |    |
|                               | 2005            | 9,274  | 7,580  | 10,475 | 13     | 130.19 | 106.42 | 147.06 | 8      |        |    |
|                               | 2006            | 9,115  | 6,473  | 10,676 | 13     | 125.35 | 89.02  | 146.83 | 12     |        |    |
|                               | 2007            | 8,908  | 5,331  | 11,308 | 13     | 120.19 | 71.93  | 152.57 | 14     |        |    |

| Metropolitan Statistical Area | PWID Population | Year   | Number      | Min    | Max    | Rank   | Rate   | Min    | Max    | Rank   |        |    |
|-------------------------------|-----------------|--------|-------------|--------|--------|--------|--------|--------|--------|--------|--------|----|
| Portland--Vancouver, OR--WA   | Young (15-29)   | 1992   | 7,380       | 5,850  | 8,781  | 14     | 222.14 | 176.08 | 264.31 | 7      |        |    |
|                               |                 | 1993   | 8,033       | 5,927  | 11,250 | 9      | 236.69 | 174.65 | 331.50 | 4      |        |    |
|                               |                 | 1994   | 6,572       | 6,019  | 7,164  | 12     | 189.79 | 173.82 | 206.90 | 8      |        |    |
|                               |                 | 1995   | 7,404       | 6,107  | 10,856 | 9      | 207.82 | 171.41 | 304.68 | 3      |        |    |
|                               |                 | 1996   | 7,272       | 5,796  | 10,768 | 9      | 197.00 | 157.02 | 291.70 | 4      |        |    |
|                               |                 | 1997   | 7,209       | 5,462  | 10,623 | 8      | 189.07 | 143.25 | 278.60 | 5      |        |    |
|                               |                 | 1998   | 7,255       | 5,291  | 10,449 | 8      | 185.20 | 135.06 | 266.74 | 6      |        |    |
|                               |                 | 1999   | 6,336       | 5,106  | 7,119  | 12     | 158.38 | 127.63 | 177.93 | 16     |        |    |
|                               |                 | 2000   | 7,457       | 5,381  | 9,876  | 8      | 183.51 | 132.41 | 243.04 | 11     |        |    |
|                               |                 | 2001   | 6,991       | 5,699  | 7,681  | 12     | 170.55 | 139.01 | 187.37 | 15     |        |    |
|                               |                 | 2002   | 7,676       | 6,359  | 8,639  | 11     | 185.38 | 153.60 | 208.67 | 12     |        |    |
|                               |                 | 2003   | 7,689       | 6,982  | 8,183  | 11     | 185.22 | 168.19 | 197.10 | 14     |        |    |
|                               |                 | 2004   | 7,643       | 7,028  | 8,350  | 13     | 184.40 | 169.57 | 201.45 | 16     |        |    |
|                               |                 | 2005   | 7,559       | 6,179  | 8,538  | 13     | 180.67 | 147.68 | 204.08 | 16     |        |    |
|                               |                 | 2006   | 7,439       | 5,283  | 8,714  | 14     | 175.95 | 124.95 | 206.10 | 16     |        |    |
|                               |                 | 2007   | 7,256       | 4,342  | 9,210  | 14     | 169.75 | 101.59 | 215.49 | 18     |        |    |
|                               |                 |        | Old (30-64) | 1992   | 14,373 | 11,393 | 17,102 | 24     | 194.63 | 154.28 | 231.58 | 22 |
|                               |                 |        |             | 1993   | 16,282 | 12,014 | 22,804 | 17     | 212.25 | 156.61 | 297.27 | 16 |
|                               |                 |        |             | 1994   | 13,713 | 12,559 | 14,949 | 22     | 173.66 | 159.04 | 189.31 | 23 |
|                               |                 |        |             | 1995   | 15,752 | 12,992 | 23,094 | 17     | 193.91 | 159.94 | 284.29 | 17 |
| 1996                          | 15,641          |        |             | 12,467 | 23,160 | 16     | 186.51 | 148.66 | 276.17 | 17     |        |    |
| 1997                          | 15,564          |        |             | 11,792 | 22,934 | 17     | 181.00 | 137.14 | 266.71 | 18     |        |    |
| 1998                          | 15,628          |        |             | 11,398 | 22,510 | 17     | 178.19 | 129.96 | 256.66 | 15     |        |    |
| 1999                          | 13,558          |        |             | 10,926 | 15,232 | 19     | 151.78 | 122.31 | 170.52 | 25     |        |    |
| 2000                          | 15,798          |        |             | 11,399 | 20,923 | 16     | 173.47 | 125.17 | 229.74 | 14     |        |    |
| 2001                          | 14,637          |        |             | 11,930 | 16,081 | 18     | 155.88 | 127.06 | 171.26 | 20     |        |    |
| 2002                          | 15,872          |        |             | 13,151 | 17,866 | 18     | 164.77 | 136.51 | 185.46 | 13     |        |    |
| 2003                          | 15,721          |        |             | 14,276 | 16,730 | 18     | 160.26 | 145.53 | 170.55 | 12     |        |    |
| 2004                          | 15,486          |        |             | 14,240 | 16,918 | 18     | 155.31 | 142.82 | 169.67 | 13     |        |    |
| 2005                          | 15,229          |        |             | 12,449 | 17,202 | 18     | 149.42 | 122.14 | 168.78 | 13     |        |    |
| 2006                          | 14,971          | 10,632 | 17,536      | 18     | 143.33 | 101.79 | 167.89 | 12     |        |        |        |    |
| 2007                          | 14,662          | 8,774  | 18,612      | 17     | 137.28 | 82.15  | 174.26 | 12     |        |        |        |    |

| Metropolitan Statistical Area           | PWID Population | Year  | Number             | Min   | Max    | Rank  | Rate   | Min   | Max    | Rank  |        |    |
|-----------------------------------------|-----------------|-------|--------------------|-------|--------|-------|--------|-------|--------|-------|--------|----|
| Providence--Fall River--Warwick, RI--MA | Total           | 1992  | 4,493              | 3,301 | 5,346  | 81    | 74.50  | 54.74 | 88.64  | 77    |        |    |
|                                         |                 | 1993  | 5,956              | 3,148 | 10,151 | 68    | 98.91  | 52.28 | 168.58 | 51    |        |    |
|                                         |                 | 1994  | 4,654              | 3,039 | 5,539  | 80    | 77.16  | 50.40 | 91.85  | 75    |        |    |
|                                         |                 | 1995  | 6,693              | 2,931 | 12,519 | 61    | 110.79 | 48.52 | 207.24 | 45    |        |    |
|                                         |                 | 1996  | 7,080              | 2,878 | 13,661 | 59    | 116.50 | 47.35 | 224.78 | 42    |        |    |
|                                         |                 | 1997  | 7,448              | 2,827 | 14,700 | 52    | 121.67 | 46.18 | 240.14 | 39    |        |    |
|                                         |                 | 1998  | 7,863              | 2,815 | 15,824 | 50    | 126.95 | 45.46 | 255.49 | 34    |        |    |
|                                         |                 | 1999  | 5,376              | 2,795 | 7,067  | 76    | 86.05  | 44.74 | 113.12 | 59    |        |    |
|                                         |                 | 2000  | 8,578              | 2,942 | 17,398 | 46    | 135.35 | 46.42 | 274.51 | 26    |        |    |
|                                         |                 | 2001  | 5,902              | 3,090 | 7,945  | 73    | 91.89  | 48.11 | 123.69 | 56    |        |    |
|                                         |                 | 2002  | 8,894              | 3,186 | 17,108 | 46    | 136.54 | 48.92 | 262.64 | 23    |        |    |
|                                         |                 | 2003  | 9,024              | 3,275 | 16,906 | 46    | 137.03 | 49.73 | 256.70 | 23    |        |    |
|                                         |                 | 2004  | 8,923              | 3,381 | 15,830 | 46    | 134.66 | 51.03 | 238.91 | 24    |        |    |
|                                         |                 | 2005  | 8,771              | 3,473 | 14,633 | 47    | 132.15 | 52.33 | 220.46 | 23    |        |    |
|                                         |                 | 2006  | 8,592              | 3,546 | 13,399 | 49    | 129.54 | 53.46 | 202.01 | 23    |        |    |
|                                         |                 | 2007  | 8,398              | 3,620 | 12,090 | 49    | 126.62 | 54.59 | 182.29 | 25    |        |    |
|                                         |                 |       | Non-Hispanic White | 1992  | 3,184  | 2,339 | 3,788  | 68    | 59.78  | 43.92 | 71.13  | 65 |
|                                         |                 |       |                    | 1993  | 4,216  | 2,228 | 7,186  | 52    | 79.86  | 42.21 | 136.11 | 46 |
|                                         |                 |       |                    | 1994  | 3,287  | 2,147 | 3,912  | 68    | 62.63  | 40.91 | 74.55  | 58 |
|                                         |                 |       |                    | 1995  | 4,710  | 2,063 | 8,811  | 47    | 90.32  | 39.55 | 168.94 | 40 |
| 1996                                    | 4,960           |       |                    | 2,016 | 9,570  | 38    | 95.28  | 38.73 | 183.83 | 37    |        |    |
| 1997                                    | 5,187           |       |                    | 1,969 | 10,238 | 36    | 99.77  | 37.87 | 196.92 | 33    |        |    |
| 1998                                    | 5,437           |       |                    | 1,947 | 10,942 | 36    | 104.27 | 37.34 | 209.84 | 29    |        |    |
| 1999                                    | 3,687           |       |                    | 1,917 | 4,847  | 61    | 70.66  | 36.74 | 92.89  | 57    |        |    |
| 2000                                    | 5,827           |       |                    | 1,998 | 11,817 | 36    | 110.98 | 38.06 | 225.09 | 24    |        |    |
| 2001                                    | 3,966           |       |                    | 2,076 | 5,338  | 57    | 75.04  | 39.29 | 101.01 | 55    |        |    |
| 2002                                    | 5,903           |       |                    | 2,115 | 11,355 | 36    | 110.91 | 39.73 | 213.34 | 23    |        |    |
| 2003                                    | 5,908           |       |                    | 2,144 | 11,069 | 35    | 110.50 | 40.10 | 207.01 | 27    |        |    |
| 2004                                    | 5,755           |       |                    | 2,181 | 10,209 | 36    | 107.56 | 40.76 | 190.83 | 28    |        |    |
| 2005                                    | 5,564           |       |                    | 2,203 | 9,283  | 38    | 104.47 | 41.37 | 174.29 | 31    |        |    |
| 2006                                    | 5,354           |       |                    | 2,209 | 8,349  | 40    | 101.13 | 41.73 | 157.71 | 33    |        |    |
| 2007                                    | 5,133           | 2,213 | 7,390              | 43    | 97.50  | 42.04 | 140.37 | 39    |        |       |        |    |

| Metropolitan Statistical Area           | PWID Population    | Year | Number   | Min  | Max    | Rank  | Rate   | Min    | Max    | Rank  |        |    |
|-----------------------------------------|--------------------|------|----------|------|--------|-------|--------|--------|--------|-------|--------|----|
| Providence--Fall River--Warwick, RI--MA | Non-Hispanic Black | 1992 | 736      | 541  | 876    | 86    | 328.41 | 241.28 | 390.73 | 44    |        |    |
|                                         |                    | 1993 | 947      | 501  | 1,614  | 77    | 411.93 | 217.71 | 702.03 | 20    |        |    |
|                                         |                    | 1994 | 702      | 459  | 836    | 85    | 293.23 | 191.52 | 349.02 | 44    |        |    |
|                                         |                    | 1995 | 941      | 412  | 1,760  | 69    | 379.15 | 166.05 | 709.22 | 19    |        |    |
|                                         |                    | 1996 | 915      | 372  | 1,765  | 69    | 352.00 | 143.07 | 679.18 | 20    |        |    |
|                                         |                    | 1997 | 876      | 333  | 1,730  | 69    | 322.85 | 122.55 | 637.22 | 20    |        |    |
|                                         |                    | 1998 | 839      | 301  | 1,689  | 69    | 294.31 | 105.39 | 592.30 | 20    |        |    |
|                                         |                    | 1999 | 522      | 271  | 686    | 86    | 175.84 | 91.42  | 231.16 | 62    |        |    |
|                                         |                    | 2000 | 762      | 261  | 1,546  | 71    | 246.83 | 84.66  | 500.62 | 26    |        |    |
|                                         |                    | 2001 | 487      | 255  | 655    | 85    | 152.14 | 79.65  | 204.78 | 65    |        |    |
|                                         |                    | 2002 | 694      | 249  | 1,335  | 73    | 209.46 | 75.04  | 402.91 | 33    |        |    |
|                                         |                    | 2003 | 683      | 248  | 1,280  | 73    | 200.31 | 72.70  | 375.27 | 33    |        |    |
|                                         |                    | 2004 | 677      | 257  | 1,201  | 74    | 193.01 | 73.14  | 342.43 | 34    |        |    |
|                                         |                    | 2005 | 692      | 274  | 1,155  | 74    | 193.70 | 76.70  | 323.15 | 34    |        |    |
|                                         |                    | 2006 | 738      | 304  | 1,150  | 75    | 203.84 | 84.12  | 317.88 | 32    |        |    |
|                                         |                    | 2007 | 824      | 355  | 1,186  | 73    | 223.22 | 96.24  | 321.36 | 27    |        |    |
|                                         |                    |      | Hispanic | 1992 | 222    | 163   | 264    | 66     | 66.48  | 48.85 | 79.10  | 74 |
|                                         |                    |      |          | 1993 | 389    | 206   | 663    | 56     | 108.74 | 57.47 | 185.31 | 52 |
|                                         |                    |      |          | 1994 | 370    | 241   | 440    | 57     | 96.94  | 63.32 | 115.39 | 55 |
|                                         |                    |      |          | 1995 | 602    | 264   | 1,126  | 49     | 147.83 | 64.74 | 276.52 | 36 |
| 1996                                    | 681                |      |          | 277  | 1,315  | 49    | 156.86 | 63.76  | 302.66 | 34    |        |    |
| 1997                                    | 732                |      |          | 278  | 1,444  | 48    | 157.17 | 59.66  | 310.20 | 32    |        |    |
| 1998                                    | 761                |      |          | 273  | 1,532  | 47    | 152.86 | 54.74  | 307.63 | 32    |        |    |
| 1999                                    | 500                |      |          | 260  | 658    | 56    | 94.07  | 48.91  | 123.67 | 44    |        |    |
| 2000                                    | 756                |      |          | 259  | 1,534  | 49    | 133.30 | 45.72  | 270.35 | 29    |        |    |
| 2001                                    | 491                |      |          | 257  | 661    | 56    | 81.62  | 42.73  | 109.86 | 52    |        |    |
| 2002                                    | 703                |      |          | 252  | 1,351  | 53    | 110.50 | 39.59  | 212.55 | 35    |        |    |
| 2003                                    | 690                |      |          | 250  | 1,292  | 53    | 103.24 | 37.47  | 193.40 | 39    |        |    |
| 2004                                    | 679                |      |          | 257  | 1,205  | 55    | 98.15  | 37.19  | 174.13 | 41    |        |    |
| 2005                                    | 693                |      |          | 275  | 1,157  | 55    | 96.68  | 38.28  | 161.29 | 41    |        |    |
| 2006                                    | 743                | 307  | 1,159    | 53   | 100.40 | 41.43 | 156.56 | 39     |        |       |        |    |
| 2007                                    | 847                | 365  | 1,219    | 53   | 111.33 | 48.00 | 160.27 | 32     |        |       |        |    |

| Metropolitan Statistical Area           | PWID Population | Year   | Number | Min   | Max    | Rank   | Rate   | Min    | Max    | Rank   |    |
|-----------------------------------------|-----------------|--------|--------|-------|--------|--------|--------|--------|--------|--------|----|
| Providence--Fall River--Warwick, RI--MA | Male            | 1992   | 2,950  | 2,167 | 3,509  | 80     | 99.69  | 73.24  | 118.61 | 80     |    |
|                                         |                 | 1993   | 3,940  | 2,083 | 6,716  | 67     | 133.39 | 70.50  | 227.33 | 49     |    |
|                                         |                 | 1994   | 3,094  | 2,021 | 3,683  | 80     | 104.56 | 68.29  | 124.46 | 73     |    |
|                                         |                 | 1995   | 4,463  | 1,954 | 8,348  | 58     | 150.70 | 66.00  | 281.89 | 42     |    |
|                                         |                 | 1996   | 4,727  | 1,921 | 9,120  | 53     | 158.76 | 64.53  | 306.32 | 40     |    |
|                                         |                 | 1997   | 4,971  | 1,887 | 9,812  | 48     | 165.79 | 62.93  | 327.22 | 36     |    |
|                                         |                 | 1998   | 5,244  | 1,878 | 10,553 | 46     | 172.93 | 61.92  | 348.02 | 34     |    |
|                                         |                 | 1999   | 3,581  | 1,862 | 4,707  | 73     | 117.08 | 60.87  | 153.92 | 57     |    |
|                                         |                 | 2000   | 5,707  | 1,957 | 11,575 | 43     | 184.05 | 63.13  | 373.29 | 23     |    |
|                                         |                 | 2001   | 3,925  | 2,055 | 5,283  | 69     | 124.73 | 65.30  | 167.88 | 52     |    |
|                                         |                 | 2002   | 5,917  | 2,120 | 11,382 | 43     | 185.18 | 66.34  | 356.20 | 21     |    |
|                                         |                 | 2003   | 6,016  | 2,183 | 11,271 | 42     | 186.10 | 67.54  | 348.63 | 20     |    |
|                                         |                 | 2004   | 5,972  | 2,263 | 10,595 | 43     | 183.19 | 69.42  | 325.00 | 19     |    |
|                                         |                 | 2005   | 5,908  | 2,339 | 9,856  | 43     | 180.76 | 71.57  | 301.56 | 19     |    |
|                                         |                 | 2006   | 5,839  | 2,410 | 9,106  | 45     | 178.74 | 73.76  | 278.73 | 21     |    |
|                                         | 2007            | 5,776  | 2,490  | 8,315 | 45     | 176.58 | 76.13  | 254.22 | 21     |        |    |
|                                         |                 | Female | 1992   | 1,512 | 1,111  | 1,799  | 78     | 49.20  | 36.15  | 58.54  | 75 |
|                                         |                 |        | 1993   | 2,006 | 1,060  | 3,418  | 67     | 65.38  | 34.55  | 111.43 | 52 |
|                                         |                 |        | 1994   | 1,571 | 1,026  | 1,870  | 81     | 51.16  | 33.41  | 60.89  | 77 |
|                                         |                 |        | 1995   | 2,269 | 994    | 4,245  | 63     | 73.69  | 32.27  | 137.85 | 46 |
|                                         |                 |        | 1996   | 2,413 | 981    | 4,655  | 59     | 77.82  | 31.63  | 150.15 | 44 |
|                                         |                 |        | 1997   | 2,551 | 968    | 5,034  | 57     | 81.67  | 31.00  | 161.20 | 43 |
|                                         |                 |        | 1998   | 2,704 | 968    | 5,443  | 53     | 85.55  | 30.63  | 172.16 | 35 |
|                                         |                 |        | 1999   | 1,855 | 964    | 2,438  | 78     | 58.16  | 30.24  | 76.45  | 64 |
|                                         |                 |        | 2000   | 2,963 | 1,016  | 6,010  | 48     | 91.55  | 31.40  | 185.67 | 27 |
|                                         | 2001            |        | 2,036  | 1,066 | 2,741  | 73     | 62.15  | 32.54  | 83.65  | 58     |    |
|                                         | 2002            | 3,054  | 1,094  | 5,875 | 48     | 92.05  | 32.98  | 177.06 | 26     |        |    |
|                                         | 2003            | 3,073  | 1,115  | 5,758 | 47     | 91.66  | 33.26  | 171.71 | 25     |        |    |
|                                         | 2004            | 3,000  | 1,137  | 5,322 | 49     | 89.11  | 33.77  | 158.10 | 24     |        |    |
|                                         | 2005            | 2,895  | 1,146  | 4,830 | 51     | 85.93  | 34.03  | 143.36 | 26     |        |    |
|                                         | 2006            | 2,768  | 1,142  | 4,316 | 54     | 82.24  | 33.94  | 128.25 | 28     |        |    |
|                                         | 2007            | 2,622  | 1,131  | 3,775 | 59     | 78.01  | 33.63  | 112.31 | 33     |        |    |

| Metropolitan Statistical Area           | PWID Population | Year  | Number      | Min   | Max    | Rank  | Rate   | Min   | Max    | Rank  |        |    |
|-----------------------------------------|-----------------|-------|-------------|-------|--------|-------|--------|-------|--------|-------|--------|----|
| Providence--Fall River--Warwick, RI--MA | Young (15-29)   | 1992  | 1,239       | 910   | 1,474  | 78    | 58.58  | 43.04 | 69.69  | 73    |        |    |
|                                         |                 | 1993  | 1,735       | 917   | 2,957  | 57    | 83.68  | 44.23 | 142.61 | 48    |        |    |
|                                         |                 | 1994  | 1,427       | 932   | 1,699  | 75    | 69.92  | 45.67 | 83.23  | 59    |        |    |
|                                         |                 | 1995  | 2,149       | 941   | 4,019  | 47    | 106.72 | 46.74 | 199.63 | 35    |        |    |
|                                         |                 | 1996  | 2,365       | 961   | 4,563  | 45    | 118.46 | 48.15 | 228.57 | 29    |        |    |
|                                         |                 | 1997  | 2,569       | 975   | 5,071  | 40    | 129.22 | 49.05 | 255.04 | 22    |        |    |
|                                         |                 | 1998  | 2,777       | 995   | 5,589  | 38    | 139.84 | 50.07 | 281.42 | 17    |        |    |
|                                         |                 | 1999  | 1,926       | 1,001 | 2,532  | 63    | 97.63  | 50.76 | 128.35 | 43    |        |    |
|                                         |                 | 2000  | 3,085       | 1,058 | 6,257  | 37    | 156.39 | 53.64 | 317.19 | 16    |        |    |
|                                         |                 | 2001  | 2,105       | 1,102 | 2,834  | 63    | 105.77 | 55.37 | 142.36 | 41    |        |    |
|                                         |                 | 2002  | 3,104       | 1,112 | 5,971  | 40    | 154.06 | 55.19 | 296.33 | 19    |        |    |
|                                         |                 | 2003  | 3,036       | 1,102 | 5,687  | 42    | 148.62 | 53.94 | 278.43 | 23    |        |    |
|                                         |                 | 2004  | 2,843       | 1,077 | 5,044  | 46    | 137.77 | 52.21 | 244.42 | 25    |        |    |
|                                         |                 | 2005  | 2,595       | 1,028 | 4,329  | 56    | 124.71 | 49.38 | 208.05 | 28    |        |    |
|                                         |                 | 2006  | 2,307       | 952   | 3,598  | 64    | 110.43 | 45.57 | 172.21 | 39    |        |    |
|                                         |                 | 2007  | 1,994       | 860   | 2,871  | 71    | 94.96  | 40.94 | 136.70 | 51    |        |    |
|                                         |                 |       | Old (30-64) | 1992  | 3,331  | 2,448 | 3,964  | 80    | 85.06  | 62.49 | 101.20 | 76 |
|                                         |                 |       |             | 1993  | 4,292  | 2,269 | 7,315  | 67    | 108.73 | 57.46 | 185.30 | 49 |
|                                         |                 |       |             | 1994  | 3,271  | 2,136 | 3,894  | 81    | 81.98  | 53.55 | 97.58  | 80 |
|                                         |                 |       |             | 1995  | 4,607  | 2,018 | 8,618  | 65    | 114.40 | 50.10 | 213.98 | 46 |
| 1996                                    | 4,794           |       |             | 1,949 | 9,251  | 64    | 117.47 | 47.75 | 226.66 | 44    |        |    |
| 1997                                    | 4,983           |       |             | 1,891 | 9,835  | 61    | 120.55 | 45.76 | 237.93 | 41    |        |    |
| 1998                                    | 5,220           |       |             | 1,869 | 10,505 | 58    | 124.07 | 44.43 | 249.69 | 40    |        |    |
| 1999                                    | 3,556           |       |             | 1,849 | 4,675  | 78    | 83.20  | 43.26 | 109.38 | 64    |        |    |
| 2000                                    | 5,678           |       |             | 1,947 | 11,515 | 48    | 130.06 | 44.61 | 263.79 | 35    |        |    |
| 2001                                    | 3,923           |       |             | 2,054 | 5,280  | 75    | 88.50  | 46.33 | 119.11 | 56    |        |    |
| 2002                                    | 5,956           |       |             | 2,134 | 11,456 | 44    | 132.38 | 47.43 | 254.64 | 26    |        |    |
| 2003                                    | 6,107           |       |             | 2,216 | 11,441 | 43    | 134.42 | 48.78 | 251.82 | 24    |        |    |
| 2004                                    | 6,118           |       |             | 2,318 | 10,854 | 42    | 134.10 | 50.81 | 237.91 | 22    |        |    |
| 2005                                    | 6,106           |       |             | 2,418 | 10,187 | 43    | 134.01 | 53.07 | 223.58 | 17    |        |    |
| 2006                                    | 6,082           | 2,510 | 9,484       | 41    | 133.86 | 55.24 | 208.74 | 14    |        |       |        |    |
| 2007                                    | 6,045           | 2,606 | 8,702       | 42    | 133.38 | 57.50 | 192.01 | 14    |        |       |        |    |



| Metropolitan Statistical Area    | PWID Population | Year  | Number             | Min   | Max    | Rank  | Rate   | Min   | Max    | Rank  |       |    |
|----------------------------------|-----------------|-------|--------------------|-------|--------|-------|--------|-------|--------|-------|-------|----|
| Raleigh--Durham--Chapel Hill, NC | Total           | 1992  | 6,654              | 6,101 | 7,052  | 64    | 101.99 | 93.52 | 108.09 | 53    |       |    |
|                                  |                 | 1993  | 5,363              | 1,706 | 6,766  | 74    | 79.56  | 25.30 | 100.37 | 68    |       |    |
|                                  |                 | 1994  | 6,503              | 6,374 | 6,689  | 64    | 93.28  | 91.44 | 95.95  | 56    |       |    |
|                                  |                 | 1995  | 5,468              | 2,585 | 6,586  | 71    | 75.67  | 35.77 | 91.15  | 70    |       |    |
|                                  |                 | 1996  | 5,505              | 2,991 | 6,742  | 71    | 73.64  | 40.00 | 90.19  | 70    |       |    |
|                                  |                 | 1997  | 5,419              | 3,360 | 6,939  | 72    | 70.13  | 43.49 | 89.81  | 69    |       |    |
|                                  |                 | 1998  | 5,296              | 3,587 | 7,157  | 71    | 66.33  | 44.92 | 89.63  | 71    |       |    |
|                                  |                 | 1999  | 5,607              | 4,419 | 7,355  | 73    | 68.18  | 53.74 | 89.44  | 75    |       |    |
|                                  |                 | 2000  | 4,855              | 3,248 | 7,658  | 80    | 57.45  | 38.43 | 90.61  | 79    |       |    |
|                                  |                 | 2001  | 5,315              | 3,390 | 8,011  | 79    | 60.90  | 38.84 | 91.78  | 80    |       |    |
|                                  |                 | 2002  | 4,708              | 2,879 | 8,400  | 82    | 52.55  | 32.14 | 93.77  | 85    |       |    |
|                                  |                 | 2003  | 4,751              | 2,955 | 8,766  | 82    | 51.90  | 32.28 | 95.76  | 90    |       |    |
|                                  |                 | 2004  | 4,948              | 3,161 | 9,201  | 78    | 52.79  | 33.72 | 98.17  | 90    |       |    |
|                                  |                 | 2005  | 5,187              | 3,380 | 9,723  | 77    | 53.65  | 34.96 | 100.57 | 92    |       |    |
|                                  |                 | 2006  | 5,482              | 3,463 | 10,326 | 75    | 54.63  | 34.52 | 102.92 | 91    |       |    |
|                                  |                 | 2007  | 5,798              | 3,285 | 10,960 | 75    | 55.68  | 31.55 | 105.26 | 88    |       |    |
|                                  |                 |       | Non-Hispanic White | 1992  | 2,857  | 2,620 | 3,028  | 71    | 60.16  | 55.17 | 63.76 | 62 |
|                                  |                 |       |                    | 1993  | 2,099  | 668   | 2,648  | 78    | 43.01  | 13.68 | 54.26 | 80 |
|                                  |                 |       |                    | 1994  | 2,389  | 2,342 | 2,457  | 77    | 47.66  | 46.72 | 49.02 | 76 |
|                                  |                 |       |                    | 1995  | 1,942  | 918   | 2,339  | 81    | 37.63  | 17.79 | 45.32 | 83 |
| 1996                             | 1,940           |       |                    | 1,054 | 2,377  | 82    | 36.68  | 19.92 | 44.92  | 83    |       |    |
| 1997                             | 1,940           |       |                    | 1,203 | 2,484  | 82    | 35.82  | 22.21 | 45.87  | 84    |       |    |
| 1998                             | 1,962           |       |                    | 1,329 | 2,651  | 84    | 35.40  | 23.97 | 47.83  | 84    |       |    |
| 1999                             | 2,178           |       |                    | 1,716 | 2,857  | 83    | 38.59  | 30.41 | 50.62  | 85    |       |    |
| 2000                             | 1,994           |       |                    | 1,334 | 3,146  | 84    | 34.83  | 23.30 | 54.93  | 86    |       |    |
| 2001                             | 2,319           |       |                    | 1,479 | 3,495  | 83    | 39.44  | 25.16 | 59.45  | 86    |       |    |
| 2002                             | 2,181           |       |                    | 1,334 | 3,891  | 83    | 36.38  | 22.25 | 64.92  | 88    |       |    |
| 2003                             | 2,329           |       |                    | 1,448 | 4,296  | 80    | 38.25  | 23.79 | 70.57  | 87    |       |    |
| 2004                             | 2,550           |       |                    | 1,629 | 4,742  | 79    | 41.18  | 26.31 | 76.58  | 87    |       |    |
| 2005                             | 2,787           |       |                    | 1,816 | 5,225  | 78    | 43.91  | 28.62 | 82.31  | 85    |       |    |
| 2006                             | 3,042           |       |                    | 1,922 | 5,730  | 76    | 46.42  | 29.33 | 87.46  | 84    |       |    |
| 2007                             | 3,285           | 1,862 | 6,210              | 75    | 48.56  | 27.52 | 91.80  | 80    |        |       |       |    |

| Metropolitan Statistical Area    | PWID Population    | Year | Number   | Min   | Max   | Rank  | Rate   | Min    | Max    | Rank  |       |    |
|----------------------------------|--------------------|------|----------|-------|-------|-------|--------|--------|--------|-------|-------|----|
| Raleigh--Durham--Chapel Hill, NC | Non-Hispanic Black | 1992 | 3,427    | 3,143 | 3,632 | 29    | 227.35 | 208.47 | 240.94 | 68    |       |    |
|                                  |                    | 1993 | 2,992    | 951   | 3,774 | 32    | 192.49 | 61.21  | 242.85 | 71    |       |    |
|                                  |                    | 1994 | 3,797    | 3,722 | 3,906 | 27    | 237.14 | 232.45 | 243.91 | 60    |       |    |
|                                  |                    | 1995 | 3,258    | 1,540 | 3,924 | 29    | 197.29 | 93.26  | 237.65 | 63    |       |    |
|                                  |                    | 1996 | 3,278    | 1,781 | 4,015 | 28    | 192.98 | 104.83 | 236.35 | 57    |       |    |
|                                  |                    | 1997 | 3,168    | 1,965 | 4,058 | 27    | 181.57 | 112.60 | 232.54 | 59    |       |    |
|                                  |                    | 1998 | 2,992    | 2,027 | 4,043 | 28    | 167.55 | 113.47 | 226.39 | 62    |       |    |
|                                  |                    | 1999 | 3,015    | 2,376 | 3,956 | 25    | 165.45 | 130.40 | 217.05 | 66    |       |    |
|                                  |                    | 2000 | 2,452    | 1,640 | 3,867 | 32    | 131.51 | 87.98  | 207.44 | 73    |       |    |
|                                  |                    | 2001 | 2,491    | 1,588 | 3,754 | 30    | 129.86 | 82.82  | 195.71 | 72    |       |    |
|                                  |                    | 2002 | 2,029    | 1,241 | 3,620 | 36    | 102.99 | 62.98  | 183.76 | 76    |       |    |
|                                  |                    | 2003 | 1,874    | 1,165 | 3,457 | 38    | 92.92  | 57.80  | 171.44 | 82    |       |    |
|                                  |                    | 2004 | 1,787    | 1,142 | 3,323 | 39    | 86.22  | 55.07  | 160.32 | 83    |       |    |
|                                  |                    | 2005 | 1,729    | 1,126 | 3,240 | 41    | 80.72  | 52.60  | 151.30 | 83    |       |    |
|                                  |                    | 2006 | 1,711    | 1,081 | 3,223 | 45    | 77.02  | 48.67  | 145.10 | 81    |       |    |
|                                  |                    | 2007 | 1,733    | 982   | 3,276 | 47    | 75.32  | 42.68  | 142.39 | 83    |       |    |
|                                  |                    |      | Hispanic | 1992  | 31    | 29    | 33     | 91     | 27.07  | 24.82 | 28.69 | 96 |
|                                  |                    |      |          | 1993  | 28    | 9     | 35     | 91     | 20.08  | 6.38  | 25.33 | 96 |
|                                  |                    |      |          | 1994  | 38    | 38    | 39     | 89     | 22.27  | 21.83 | 22.91 | 96 |
|                                  |                    |      |          | 1995  | 37    | 18    | 45     | 88     | 17.74  | 8.39  | 21.37 | 96 |
| 1996                             | 44                 |      |          | 24    | 54    | 88    | 17.00  | 9.24   | 20.82  | 96    |       |    |
| 1997                             | 52                 |      |          | 32    | 67    | 87    | 16.22  | 10.06  | 20.78  | 96    |       |    |
| 1998                             | 61                 |      |          | 41    | 83    | 85    | 15.63  | 10.58  | 21.12  | 94    |       |    |
| 1999                             | 78                 |      |          | 61    | 102   | 83    | 16.60  | 13.08  | 21.77  | 94    |       |    |
| 2000                             | 81                 |      |          | 54    | 128   | 83    | 14.74  | 9.86   | 23.25  | 94    |       |    |
| 2001                             | 105                |      |          | 67    | 159   | 79    | 17.72  | 11.30  | 26.70  | 94    |       |    |
| 2002                             | 109                |      |          | 67    | 195   | 79    | 17.17  | 10.50  | 30.63  | 93    |       |    |
| 2003                             | 127                |      |          | 79    | 235   | 76    | 18.92  | 11.77  | 34.91  | 92    |       |    |
| 2004                             | 149                |      |          | 95    | 278   | 75    | 21.05  | 13.45  | 39.14  | 91    |       |    |
| 2005                             | 172                |      |          | 112   | 323   | 75    | 22.80  | 14.86  | 42.73  | 87    |       |    |
| 2006                             | 194                | 123  | 366      | 74    | 23.94 | 15.12 | 45.09  | 87     |        |       |       |    |
| 2007                             | 212                | 120  | 401      | 72    | 24.38 | 13.82 | 46.09  | 89     |        |       |       |    |

| Metropolitan Statistical Area    | PWID Population | Year   | Number | Min   | Max   | Rank  | Rate   | Min    | Max    | Rank  |    |
|----------------------------------|-----------------|--------|--------|-------|-------|-------|--------|--------|--------|-------|----|
| Raleigh--Durham--Chapel Hill, NC | Male            | 1992   | 4,415  | 4,048 | 4,678 | 64    | 137.56 | 126.13 | 145.78 | 52    |    |
|                                  |                 | 1993   | 3,533  | 1,123 | 4,457 | 73    | 106.65 | 33.92  | 134.56 | 65    |    |
|                                  |                 | 1994   | 4,256  | 4,172 | 4,377 | 65    | 124.07 | 121.62 | 127.62 | 53    |    |
|                                  |                 | 1995   | 3,558  | 1,682 | 4,286 | 71    | 99.97  | 47.26  | 120.42 | 67    |    |
|                                  |                 | 1996   | 3,564  | 1,936 | 4,364 | 72    | 96.71  | 52.54  | 118.44 | 69    |    |
|                                  |                 | 1997   | 3,491  | 2,165 | 4,471 | 73    | 91.49  | 56.74  | 117.17 | 72    |    |
|                                  |                 | 1998   | 3,397  | 2,300 | 4,590 | 74    | 86.06  | 58.29  | 116.29 | 73    |    |
|                                  |                 | 1999   | 3,580  | 2,822 | 4,697 | 74    | 87.83  | 69.23  | 115.22 | 74    |    |
|                                  |                 | 2000   | 3,087  | 2,065 | 4,869 | 82    | 73.32  | 49.05  | 115.65 | 79    |    |
|                                  |                 | 2001   | 3,364  | 2,146 | 5,070 | 77    | 77.40  | 49.36  | 116.65 | 80    |    |
|                                  |                 | 2002   | 2,965  | 1,814 | 5,291 | 83    | 66.49  | 40.66  | 118.64 | 87    |    |
|                                  |                 | 2003   | 2,977  | 1,851 | 5,492 | 84    | 65.48  | 40.73  | 120.81 | 88    |    |
|                                  |                 | 2004   | 3,081  | 1,968 | 5,729 | 81    | 66.13  | 42.24  | 122.96 | 89    |    |
|                                  |                 | 2005   | 3,207  | 2,090 | 6,012 | 78    | 66.76  | 43.51  | 125.14 | 88    |    |
|                                  | 2006            | 3,362  | 2,125  | 6,334 | 74    | 67.33 | 42.54  | 126.84 | 89     |       |    |
|                                  | 2007            | 3,523  | 1,997  | 6,661 | 74    | 68.18 | 38.64  | 128.90 | 87     |       |    |
|                                  |                 | Female | 1992   | 2,329 | 2,135 | 2,468 | 65     | 70.26  | 64.42  | 74.46 | 51 |
|                                  |                 |        | 1993   | 1,892 | 602   | 2,387 | 69     | 55.17  | 17.55  | 69.61 | 64 |
|                                  |                 |        | 1994   | 2,314 | 2,268 | 2,380 | 66     | 65.34  | 64.05  | 67.20 | 59 |
|                                  |                 |        | 1995   | 1,963 | 928   | 2,365 | 72     | 53.53  | 25.31  | 64.48 | 66 |
|                                  |                 |        | 1996   | 1,995 | 1,084 | 2,443 | 69     | 52.62  | 28.59  | 64.45 | 68 |
|                                  |                 |        | 1997   | 1,982 | 1,229 | 2,538 | 71     | 50.67  | 31.42  | 64.89 | 71 |
|                                  |                 |        | 1998   | 1,955 | 1,324 | 2,641 | 75     | 48.41  | 32.79  | 65.41 | 74 |
|                                  |                 |        | 1999   | 2,087 | 1,645 | 2,738 | 71     | 50.33  | 39.67  | 66.03 | 73 |
|                                  |                 |        | 2000   | 1,822 | 1,219 | 2,874 | 77     | 42.95  | 28.73  | 67.75 | 80 |
|                                  |                 |        | 2001   | 2,009 | 1,281 | 3,028 | 75     | 45.84  | 29.24  | 69.09 | 85 |
|                                  | 2002            |        | 1,790  | 1,095 | 3,194 | 79    | 39.79  | 24.33  | 70.99  | 87    |    |
|                                  | 2003            |        | 1,815  | 1,129 | 3,349 | 78    | 39.38  | 24.49  | 72.66  | 87    |    |
|                                  | 2004            | 1,897  | 1,212  | 3,527 | 79    | 40.24 | 25.70  | 74.82  | 87     |       |    |
|                                  | 2005            | 1,991  | 1,298  | 3,733 | 77    | 40.95 | 26.68  | 76.75  | 85     |       |    |
|                                  | 2006            | 2,104  | 1,329  | 3,964 | 73    | 41.75 | 26.38  | 78.65  | 85     |       |    |
|                                  | 2007            | 2,221  | 1,258  | 4,198 | 72    | 42.34 | 23.99  | 80.03  | 82     |       |    |

| Metropolitan Statistical Area    | PWID Population | Year  | Number      | Min   | Max   | Rank  | Rate  | Min   | Max    | Rank   |        |    |
|----------------------------------|-----------------|-------|-------------|-------|-------|-------|-------|-------|--------|--------|--------|----|
| Raleigh--Durham--Chapel Hill, NC | Young (15-29)   | 1992  | 1,937       | 1,776 | 2,053 | 56    | 79.37 | 72.78 | 84.12  | 56     |        |    |
|                                  |                 | 1993  | 1,405       | 447   | 1,773 | 72    | 56.73 | 18.04 | 71.57  | 66     |        |    |
|                                  |                 | 1994  | 1,572       | 1,541 | 1,617 | 69    | 62.35 | 61.12 | 64.14  | 67     |        |    |
|                                  |                 | 1995  | 1,249       | 591   | 1,505 | 74    | 48.39 | 22.88 | 58.29  | 75     |        |    |
|                                  |                 | 1996  | 1,216       | 661   | 1,489 | 76    | 46.04 | 25.01 | 56.38  | 80     |        |    |
|                                  |                 | 1997  | 1,181       | 732   | 1,513 | 78    | 43.66 | 27.07 | 55.91  | 81     |        |    |
|                                  |                 | 1998  | 1,159       | 785   | 1,567 | 82    | 41.95 | 28.41 | 56.68  | 84     |        |    |
|                                  |                 | 1999  | 1,251       | 986   | 1,641 | 83    | 44.46 | 35.05 | 58.33  | 87     |        |    |
|                                  |                 | 2000  | 1,117       | 747   | 1,761 | 86    | 39.21 | 26.23 | 61.85  | 92     |        |    |
|                                  |                 | 2001  | 1,271       | 811   | 1,915 | 85    | 44.15 | 28.16 | 66.54  | 94     |        |    |
|                                  |                 | 2002  | 1,176       | 719   | 2,099 | 87    | 40.54 | 24.80 | 72.34  | 98     |        |    |
|                                  |                 | 2003  | 1,243       | 773   | 2,293 | 88    | 42.82 | 26.63 | 79.01  | 98     |        |    |
|                                  |                 | 2004  | 1,354       | 865   | 2,518 | 88    | 46.16 | 29.49 | 85.83  | 99     |        |    |
|                                  |                 | 2005  | 1,479       | 964   | 2,773 | 83    | 49.33 | 32.14 | 92.46  | 98     |        |    |
|                                  |                 | 2006  | 1,619       | 1,023 | 3,050 | 81    | 52.14 | 32.94 | 98.22  | 95     |        |    |
|                                  |                 | 2007  | 1,758       | 996   | 3,324 | 80    | 55.08 | 31.21 | 104.13 | 92     |        |    |
|                                  |                 |       | Old (30-64) | 1992  | 4,820 | 4,420 | 5,108 | 64    | 118.05 | 108.24 | 125.10 | 49 |
|                                  |                 |       |             | 1993  | 4,004 | 1,273 | 5,051 | 71    | 93.89  | 29.86  | 118.45 | 63 |
|                                  |                 |       |             | 1994  | 4,966 | 4,868 | 5,108 | 62    | 111.61 | 109.40 | 114.79 | 52 |
|                                  |                 |       |             | 1995  | 4,247 | 2,008 | 5,116 | 68    | 91.44  | 43.23  | 110.15 | 65 |
| 1996                             | 4,326           |       |             | 2,350 | 5,299 | 67    | 89.50 | 48.62 | 109.61 | 62     |        |    |
| 1997                             | 4,289           |       |             | 2,660 | 5,492 | 67    | 85.40 | 52.96 | 109.38 | 64     |        |    |
| 1998                             | 4,203           |       |             | 2,847 | 5,679 | 69    | 80.50 | 54.52 | 108.78 | 65     |        |    |
| 1999                             | 4,442           |       |             | 3,501 | 5,828 | 69    | 82.10 | 64.71 | 107.71 | 66     |        |    |
| 2000                             | 3,824           |       |             | 2,558 | 6,031 | 73    | 68.23 | 45.64 | 107.63 | 72     |        |    |
| 2001                             | 4,143           |       |             | 2,642 | 6,243 | 73    | 70.82 | 45.16 | 106.73 | 75     |        |    |
| 2002                             | 3,613           |       |             | 2,210 | 6,447 | 75    | 59.65 | 36.48 | 106.43 | 77     |        |    |
| 2003                             | 3,572           |       |             | 2,222 | 6,590 | 75    | 57.13 | 35.53 | 105.40 | 76     |        |    |
| 2004                             | 3,622           |       |             | 2,313 | 6,734 | 74    | 56.24 | 35.92 | 104.57 | 76     |        |    |
| 2005                             | 3,669           |       |             | 2,391 | 6,877 | 72    | 55.02 | 35.86 | 103.14 | 76     |        |    |
| 2006                             | 3,714           |       |             | 2,347 | 6,997 | 68    | 53.61 | 33.87 | 100.99 | 76     |        |    |
| 2007                             | 3,722           | 2,109 | 7,035       | 66    | 51.54 | 29.21 | 97.44 | 74    |        |        |        |    |

| Metropolitan Statistical Area | PWID Population | Year  | Number             | Min   | Max    | Rank  | Rate   | Min    | Max    | Rank  |       |    |
|-------------------------------|-----------------|-------|--------------------|-------|--------|-------|--------|--------|--------|-------|-------|----|
| Richmond--Petersburg, VA      | Total           | 1992  | 8,085              | 6,312 | 9,634  | 56    | 132.85 | 103.71 | 158.30 | 43    |       |    |
|                               |                 | 1993  | 6,803              | 3,085 | 9,620  | 60    | 110.19 | 49.96  | 155.83 | 46    |       |    |
|                               |                 | 1994  | 7,988              | 6,232 | 9,588  | 56    | 127.61 | 99.56  | 153.17 | 41    |       |    |
|                               |                 | 1995  | 6,801              | 3,438 | 9,541  | 60    | 107.29 | 54.23  | 150.52 | 48    |       |    |
|                               |                 | 1996  | 6,793              | 3,607 | 9,489  | 61    | 105.76 | 56.16  | 147.74 | 46    |       |    |
|                               |                 | 1997  | 6,784              | 3,759 | 9,441  | 63    | 104.16 | 57.71  | 144.96 | 47    |       |    |
|                               |                 | 1998  | 6,761              | 3,906 | 9,370  | 60    | 102.57 | 59.26  | 142.14 | 47    |       |    |
|                               |                 | 1999  | 7,640              | 5,927 | 9,304  | 54    | 114.40 | 88.76  | 139.32 | 41    |       |    |
|                               |                 | 2000  | 6,777              | 4,364 | 9,350  | 58    | 99.99  | 64.39  | 137.94 | 49    |       |    |
|                               |                 | 2001  | 7,507              | 5,616 | 9,377  | 57    | 109.32 | 81.78  | 136.57 | 46    |       |    |
|                               |                 | 2002  | 6,768              | 4,592 | 9,607  | 58    | 96.98  | 65.80  | 137.65 | 48    |       |    |
|                               |                 | 2003  | 6,781              | 4,712 | 9,829  | 56    | 95.71  | 66.50  | 138.73 | 47    |       |    |
|                               |                 | 2004  | 6,790              | 4,817 | 10,062 | 56    | 94.38  | 66.96  | 139.87 | 48    |       |    |
|                               |                 | 2005  | 6,810              | 4,720 | 10,323 | 56    | 93.02  | 64.47  | 141.00 | 50    |       |    |
|                               |                 | 2006  | 6,840              | 4,468 | 10,633 | 60    | 91.73  | 59.92  | 142.60 | 50    |       |    |
|                               |                 | 2007  | 6,836              | 4,186 | 10,903 | 61    | 90.42  | 55.36  | 144.20 | 53    |       |    |
|                               |                 |       | Non-Hispanic White | 1992  | 2,011  | 1,570 | 2,397  | 82     | 48.55  | 37.90 | 57.85 | 77 |
|                               |                 |       |                    | 1993  | 1,688  | 765   | 2,387  | 86     | 40.37  | 18.31 | 57.10 | 82 |
|                               |                 |       |                    | 1994  | 2,005  | 1,564 | 2,407  | 82     | 47.55  | 37.10 | 57.07 | 77 |
|                               |                 |       |                    | 1995  | 1,748  | 884   | 2,452  | 86     | 41.08  | 20.76 | 57.63 | 80 |
| 1996                          | 1,805           |       |                    | 958   | 2,521  | 85    | 42.10  | 22.36  | 58.81  | 79    |       |    |
| 1997                          | 1,876           |       |                    | 1,040 | 2,612  | 85    | 43.53  | 24.12  | 60.59  | 76    |       |    |
| 1998                          | 1,957           |       |                    | 1,131 | 2,713  | 85    | 45.27  | 26.16  | 62.74  | 74    |       |    |
| 1999                          | 2,322           |       |                    | 1,801 | 2,828  | 80    | 53.44  | 41.46  | 65.08  | 69    |       |    |
| 2000                          | 2,165           |       |                    | 1,394 | 2,986  | 82    | 49.32  | 31.76  | 68.04  | 72    |       |    |
| 2001                          | 2,518           |       |                    | 1,883 | 3,145  | 78    | 56.93  | 42.59  | 71.12  | 68    |       |    |
| 2002                          | 2,378           |       |                    | 1,613 | 3,375  | 79    | 53.24  | 36.12  | 75.57  | 68    |       |    |
| 2003                          | 2,486           |       |                    | 1,727 | 3,603  | 79    | 55.13  | 38.31  | 79.92  | 67    |       |    |
| 2004                          | 2,584           |       |                    | 1,833 | 3,829  | 78    | 56.79  | 40.29  | 84.16  | 68    |       |    |
| 2005                          | 2,673           |       |                    | 1,853 | 4,052  | 79    | 58.04  | 40.23  | 87.98  | 67    |       |    |
| 2006                          | 2,749           |       |                    | 1,796 | 4,273  | 80    | 58.93  | 38.49  | 91.60  | 67    |       |    |
| 2007                          | 2,790           | 1,708 | 4,450              | 79    | 59.31  | 36.31 | 94.59  | 65     |        |       |       |    |

| Metropolitan Statistical Area | PWID Population    | Year | Number   | Min   | Max   | Rank  | Rate   | Min    | Max    | Rank  |        |    |
|-------------------------------|--------------------|------|----------|-------|-------|-------|--------|--------|--------|-------|--------|----|
| Richmond--Petersburg, VA      | Non-Hispanic Black | 1992 | 5,153    | 4,023 | 6,140 | 20    | 294.64 | 230.02 | 351.10 | 51    |        |    |
|                               |                    | 1993 | 4,489    | 2,035 | 6,347 | 22    | 251.66 | 114.11 | 355.88 | 53    |        |    |
|                               |                    | 1994 | 5,365    | 4,186 | 6,440 | 20    | 295.18 | 230.30 | 354.31 | 43    |        |    |
|                               |                    | 1995 | 4,589    | 2,319 | 6,437 | 22    | 249.14 | 125.93 | 349.51 | 51    |        |    |
|                               |                    | 1996 | 4,553    | 2,418 | 6,360 | 21    | 242.94 | 129.01 | 339.36 | 48    |        |    |
|                               |                    | 1997 | 4,475    | 2,479 | 6,227 | 20    | 233.25 | 129.24 | 324.62 | 46    |        |    |
|                               |                    | 1998 | 4,352    | 2,514 | 6,031 | 19    | 221.91 | 128.21 | 307.53 | 45    |        |    |
|                               |                    | 1999 | 4,764    | 3,696 | 5,802 | 18    | 238.15 | 184.77 | 290.02 | 33    |        |    |
|                               |                    | 2000 | 4,070    | 2,621 | 5,616 | 18    | 200.77 | 129.29 | 276.99 | 41    |        |    |
|                               |                    | 2001 | 4,325    | 3,235 | 5,402 | 18    | 210.23 | 157.27 | 262.62 | 34    |        |    |
|                               |                    | 2002 | 3,734    | 2,534 | 5,300 | 18    | 177.75 | 120.60 | 252.29 | 43    |        |    |
|                               |                    | 2003 | 3,588    | 2,493 | 5,201 | 20    | 167.98 | 116.72 | 243.48 | 44    |        |    |
|                               |                    | 2004 | 3,463    | 2,457 | 5,132 | 21    | 159.02 | 112.82 | 235.64 | 47    |        |    |
|                               |                    | 2005 | 3,378    | 2,342 | 5,121 | 22    | 152.20 | 105.49 | 230.72 | 49    |        |    |
|                               |                    | 2006 | 3,343    | 2,184 | 5,197 | 22    | 147.84 | 96.56  | 229.82 | 52    |        |    |
|                               |                    | 2007 | 3,344    | 2,048 | 5,334 | 22    | 145.52 | 89.10  | 232.08 | 54    |        |    |
|                               |                    |      | Hispanic | 1992  | 85    | 67    | 102    | 77     | 113.29 | 88.44 | 135.00 | 57 |
|                               |                    |      |          | 1993  | 72    | 33    | 102    | 80     | 87.41  | 39.64 | 123.61 | 59 |
|                               |                    |      |          | 1994  | 87    | 67    | 104    | 79     | 95.69  | 74.65 | 114.85 | 56 |
|                               |                    |      |          | 1995  | 77    | 39    | 107    | 79     | 77.27  | 39.06 | 108.40 | 58 |
| 1996                          | 80                 |      |          | 43    | 112   | 79    | 73.36  | 38.96  | 102.48 | 59    |        |    |
| 1997                          | 85                 |      |          | 47    | 119   | 79    | 70.19  | 38.89  | 97.68  | 60    |        |    |
| 1998                          | 91                 |      |          | 53    | 126   | 79    | 67.28  | 38.87  | 93.24  | 59    |        |    |
| 1999                          | 110                |      |          | 86    | 134   | 76    | 73.67  | 57.16  | 89.72  | 59    |        |    |
| 2000                          | 105                |      |          | 68    | 145   | 76    | 62.63  | 40.33  | 86.41  | 62    |        |    |
| 2001                          | 125                |      |          | 93    | 156   | 76    | 67.70  | 50.64  | 84.57  | 60    |        |    |
| 2002                          | 120                |      |          | 81    | 170   | 76    | 59.75  | 40.54  | 84.80  | 62    |        |    |
| 2003                          | 127                |      |          | 88    | 184   | 76    | 58.18  | 40.42  | 84.33  | 61    |        |    |
| 2004                          | 133                |      |          | 94    | 197   | 77    | 56.92  | 40.39  | 84.35  | 61    |        |    |
| 2005                          | 138                |      |          | 95    | 209   | 78    | 54.29  | 37.63  | 82.30  | 62    |        |    |
| 2006                          | 141                | 92   | 219      | 79    | 51.01 | 33.32 | 79.29  | 63     |        |       |        |    |
| 2007                          | 141                | 87   | 226      | 82    | 47.90 | 29.33 | 76.39  | 64     |        |       |        |    |

| Metropolitan Statistical Area | PWID Population | Year   | Number | Min   | Max   | Rank   | Rate   | Min    | Max    | Rank   |    |
|-------------------------------|-----------------|--------|--------|-------|-------|--------|--------|--------|--------|--------|----|
| Richmond--Petersburg, VA      | Male            | 1992   | 4,924  | 3,844 | 5,868 | 57     | 167.24 | 130.56 | 199.28 | 40     |    |
|                               |                 | 1993   | 4,268  | 1,935 | 6,036 | 63     | 142.67 | 64.69  | 201.75 | 44     |    |
|                               |                 | 1994   | 5,097  | 3,976 | 6,117 | 56     | 168.08 | 131.13 | 201.75 | 37     |    |
|                               |                 | 1995   | 4,368  | 2,208 | 6,128 | 61     | 142.30 | 71.93  | 199.63 | 43     |    |
|                               |                 | 1996   | 4,357  | 2,314 | 6,086 | 61     | 140.19 | 74.44  | 195.82 | 44     |    |
|                               |                 | 1997   | 4,317  | 2,392 | 6,008 | 60     | 136.90 | 75.85  | 190.53 | 45     |    |
|                               |                 | 1998   | 4,248  | 2,454 | 5,887 | 61     | 132.89 | 76.77  | 184.16 | 45     |    |
|                               |                 | 1999   | 4,724  | 3,665 | 5,753 | 58     | 145.73 | 113.06 | 177.47 | 39     |    |
|                               |                 | 2000   | 4,117  | 2,651 | 5,680 | 61     | 124.91 | 80.44  | 172.33 | 47     |    |
|                               |                 | 2001   | 4,481  | 3,352 | 5,597 | 60     | 134.09 | 100.31 | 167.51 | 45     |    |
|                               |                 | 2002   | 3,979  | 2,699 | 5,647 | 65     | 117.03 | 79.40  | 166.10 | 51     |    |
|                               |                 | 2003   | 3,943  | 2,740 | 5,715 | 65     | 113.99 | 79.21  | 165.23 | 55     |    |
|                               |                 | 2004   | 3,931  | 2,789 | 5,826 | 64     | 111.94 | 79.41  | 165.87 | 54     |    |
|                               |                 | 2005   | 3,961  | 2,745 | 6,004 | 65     | 110.80 | 76.80  | 167.96 | 55     |    |
|                               |                 | 2006   | 4,039  | 2,638 | 6,279 | 63     | 110.66 | 72.28  | 172.02 | 55     |    |
|                               | 2007            | 4,147  | 2,539  | 6,614 | 61    | 111.91 | 68.52  | 178.48 | 53     |        |    |
|                               |                 | Female | 1992   | 3,002 | 2,343 | 3,577  | 48     | 95.55  | 74.60  | 113.86 | 38 |
|                               |                 |        | 1993   | 2,467 | 1,118 | 3,488  | 59     | 77.52  | 35.15  | 109.63 | 40 |
|                               |                 |        | 1994   | 2,860 | 2,231 | 3,432  | 53     | 88.61  | 69.13  | 106.36 | 36 |
|                               |                 |        | 1995   | 2,428 | 1,227 | 3,406  | 58     | 74.25  | 37.53  | 104.17 | 45 |
|                               |                 |        | 1996   | 2,437 | 1,294 | 3,404  | 58     | 73.50  | 39.03  | 102.67 | 49 |
|                               |                 |        | 1997   | 2,461 | 1,363 | 3,425  | 58     | 73.24  | 40.58  | 101.94 | 49 |
|                               |                 |        | 1998   | 2,491 | 1,439 | 3,452  | 59     | 73.38  | 42.40  | 101.69 | 51 |
|                               |                 |        | 1999   | 2,867 | 2,225 | 3,492  | 57     | 83.44  | 64.74  | 101.62 | 42 |
|                               |                 |        | 2000   | 2,594 | 1,670 | 3,578  | 57     | 74.48  | 47.96  | 102.75 | 47 |
|                               |                 |        | 2001   | 2,927 | 2,190 | 3,657  | 55     | 83.04  | 62.12  | 103.74 | 38 |
|                               | 2002            |        | 2,683  | 1,821 | 3,809 | 55     | 74.97  | 50.87  | 106.41 | 41     |    |
|                               | 2003            | 2,724  | 1,892  | 3,948 | 54    | 75.11  | 52.19  | 108.87 | 42     |        |    |
|                               | 2004            | 2,749  | 1,950  | 4,073 | 54    | 74.65  | 52.96  | 110.62 | 40     |        |    |
|                               | 2005            | 2,760  | 1,913  | 4,184 | 57    | 73.67  | 51.06  | 111.67 | 42     |        |    |
|                               | 2006            | 2,753  | 1,798  | 4,280 | 55    | 72.33  | 47.24  | 112.44 | 40     |        |    |
|                               | 2007            | 2,706  | 1,657  | 4,316 | 55    | 70.21  | 42.99  | 111.96 | 44     |        |    |

| Metropolitan Statistical Area | PWID Population | Year        | Number | Min   | Max   | Rank  | Rate   | Min    | Max    | Rank   |    |
|-------------------------------|-----------------|-------------|--------|-------|-------|-------|--------|--------|--------|--------|----|
| Richmond--Petersburg, VA      | Young (15-29)   | 1992        | 1,712  | 1,336 | 2,040 | 65    | 86.37  | 67.43  | 102.92 | 54     |    |
|                               |                 | 1993        | 1,478  | 670   | 2,090 | 68    | 75.19  | 34.09  | 106.33 | 54     |    |
|                               |                 | 1994        | 1,809  | 1,411 | 2,171 | 61    | 92.83  | 72.42  | 111.42 | 41     |    |
|                               |                 | 1995        | 1,624  | 821   | 2,278 | 63    | 83.74  | 42.33  | 117.47 | 53     |    |
|                               |                 | 1996        | 1,722  | 914   | 2,405 | 61    | 88.84  | 47.18  | 124.10 | 49     |    |
|                               |                 | 1997        | 1,831  | 1,014 | 2,548 | 60    | 93.60  | 51.86  | 130.26 | 45     |    |
|                               |                 | 1998        | 1,941  | 1,122 | 2,690 | 59    | 98.46  | 56.88  | 136.44 | 43     |    |
|                               |                 | 1999        | 2,323  | 1,803 | 2,829 | 52    | 117.55 | 91.21  | 143.16 | 34     |    |
|                               |                 | 2000        | 2,166  | 1,395 | 2,988 | 54    | 108.60 | 69.94  | 149.83 | 38     |    |
|                               |                 | 2001        | 2,495  | 1,866 | 3,116 | 52    | 124.28 | 92.97  | 155.25 | 33     |    |
|                               |                 | 2002        | 2,308  | 1,566 | 3,275 | 54    | 113.23 | 76.82  | 160.71 | 41     |    |
|                               |                 | 2003        | 2,333  | 1,621 | 3,382 | 57    | 112.22 | 77.97  | 162.66 | 42     |    |
|                               |                 | 2004        | 2,313  | 1,641 | 3,427 | 62    | 108.89 | 77.26  | 161.37 | 44     |    |
|                               |                 | 2005        | 2,244  | 1,555 | 3,402 | 67    | 102.31 | 70.91  | 155.09 | 49     |    |
|                               |                 | 2006        | 2,122  | 1,386 | 3,298 | 69    | 93.80  | 61.27  | 145.82 | 52     |    |
|                               | 2007            | 1,932       | 1,183  | 3,081 | 74    | 83.56 | 51.16  | 133.26 | 54     |        |    |
|                               |                 | Old (30-64) | 1992   | 6,360 | 4,965 | 7,579 | 53     | 154.97 | 120.98 | 184.66 | 39 |
|                               |                 |             | 1993   | 5,300 | 2,403 | 7,495 | 57     | 125.95 | 57.11  | 178.11 | 43 |
|                               |                 |             | 1994   | 6,144 | 4,794 | 7,375 | 52     | 142.53 | 111.20 | 171.07 | 40 |
|                               |                 |             | 1995   | 5,152 | 2,604 | 7,228 | 58     | 117.09 | 59.18  | 164.26 | 44 |
|                               |                 |             | 1996   | 5,057 | 2,685 | 7,063 | 60     | 112.75 | 59.87  | 157.50 | 45 |
| 1997                          |                 |             | 4,954  | 2,745 | 6,895 | 62    | 108.72 | 60.24  | 151.30 | 47     |    |
| 1998                          |                 |             | 4,839  | 2,796 | 6,706 | 62    | 104.74 | 60.51  | 145.14 | 48     |    |
| 1999                          |                 |             | 5,358  | 4,157 | 6,525 | 55    | 113.95 | 88.41  | 138.78 | 43     |    |
| 2000                          |                 |             | 4,662  | 3,002 | 6,432 | 60    | 97.46  | 62.76  | 134.46 | 53     |    |
| 2001                          |                 |             | 5,079  | 3,799 | 6,344 | 57    | 104.52 | 78.19  | 130.56 | 48     |    |
| 2002                          |                 |             | 4,522  | 3,068 | 6,418 | 61    | 91.52  | 62.09  | 129.90 | 53     |    |
| 2003                          |                 |             | 4,500  | 3,127 | 6,523 | 59    | 89.90  | 62.46  | 130.30 | 51     |    |
| 2004                          |                 |             | 4,508  | 3,198 | 6,680 | 60    | 88.91  | 63.08  | 131.76 | 48     |    |
| 2005                          |                 |             | 4,561  | 3,161 | 6,914 | 56    | 88.95  | 61.65  | 134.83 | 46     |    |
| 2006                          |                 |             | 4,663  | 3,045 | 7,248 | 55    | 89.75  | 58.62  | 139.52 | 43     |    |
| 2007                          | 4,782           | 2,928       | 7,626  | 53    | 91.10 | 55.78 | 145.29 | 38     |        |        |    |



| Metropolitan Statistical Area | PWID Population | Year  | Number             | Min    | Max    | Rank  | Rate   | Min   | Max    | Rank  |        |    |
|-------------------------------|-----------------|-------|--------------------|--------|--------|-------|--------|-------|--------|-------|--------|----|
| Riverside--San Bernardino, CA | Total           | 1992  | 29,526             | 16,834 | 46,386 | 8     | 167.55 | 95.53 | 263.23 | 24    |        |    |
|                               |                 | 1993  | 32,322             | 14,901 | 46,844 | 8     | 181.84 | 83.83 | 263.54 | 19    |        |    |
|                               |                 | 1994  | 25,513             | 13,124 | 38,406 | 11    | 142.26 | 73.18 | 214.15 | 35    |        |    |
|                               |                 | 1995  | 28,157             | 11,447 | 41,748 | 9     | 155.04 | 63.03 | 229.88 | 25    |        |    |
|                               |                 | 1996  | 26,589             | 11,830 | 39,057 | 11    | 144.71 | 64.38 | 212.56 | 29    |        |    |
|                               |                 | 1997  | 25,497             | 13,315 | 36,641 | 13    | 135.51 | 70.76 | 194.74 | 30    |        |    |
|                               |                 | 1998  | 24,818             | 14,414 | 34,277 | 13    | 128.10 | 74.40 | 176.92 | 31    |        |    |
|                               |                 | 1999  | 21,238             | 14,539 | 25,795 | 16    | 106.09 | 72.63 | 128.85 | 45    |        |    |
|                               |                 | 2000  | 22,848             | 13,730 | 27,939 | 15    | 110.46 | 66.38 | 135.08 | 42    |        |    |
|                               |                 | 2001  | 20,840             | 11,946 | 26,847 | 18    | 96.91  | 55.55 | 124.84 | 53    |        |    |
|                               |                 | 2002  | 21,221             | 9,718  | 27,479 | 18    | 94.90  | 43.46 | 122.89 | 49    |        |    |
|                               |                 | 2003  | 20,829             | 8,173  | 28,893 | 18    | 89.10  | 34.96 | 123.60 | 54    |        |    |
|                               |                 | 2004  | 20,865             | 7,649  | 31,905 | 17    | 85.22  | 31.24 | 130.32 | 57    |        |    |
|                               |                 | 2005  | 20,834             | 7,264  | 34,902 | 17    | 81.81  | 28.52 | 137.04 | 58    |        |    |
|                               |                 | 2006  | 20,703             | 6,801  | 38,036 | 17    | 78.50  | 25.79 | 144.23 | 60    |        |    |
|                               |                 | 2007  | 20,380             | 3,679  | 40,922 | 18    | 75.41  | 13.61 | 151.41 | 63    |        |    |
|                               |                 |       | Non-Hispanic White | 1992   | 13,551 | 7,726 | 21,289 | 13    | 129.53 | 73.85 | 203.50 | 24 |
|                               |                 |       |                    | 1993   | 14,609 | 6,735 | 21,173 | 11    | 142.33 | 65.62 | 206.28 | 19 |
|                               |                 |       |                    | 1994   | 11,345 | 5,836 | 17,078 | 16    | 112.57 | 57.91 | 169.45 | 28 |
|                               |                 |       |                    | 1995   | 12,311 | 5,005 | 18,254 | 13    | 123.88 | 50.37 | 183.68 | 23 |
| 1996                          | 11,431          |       |                    | 5,086  | 16,792 | 15    | 116.61 | 51.88 | 171.29 | 24    |        |    |
| 1997                          | 10,784          |       |                    | 5,632  | 15,498 | 16    | 109.90 | 57.39 | 157.94 | 28    |        |    |
| 1998                          | 10,339          |       |                    | 6,005  | 14,280 | 17    | 104.65 | 60.78 | 144.53 | 26    |        |    |
| 1999                          | 8,730           |       |                    | 5,977  | 10,604 | 21    | 87.39  | 59.83 | 106.14 | 42    |        |    |
| 2000                          | 9,291           |       |                    | 5,584  | 11,362 | 22    | 91.93  | 55.25 | 112.42 | 41    |        |    |
| 2001                          | 8,411           |       |                    | 4,822  | 10,836 | 23    | 81.50  | 46.72 | 104.99 | 51    |        |    |
| 2002                          | 8,534           |       |                    | 3,908  | 11,051 | 23    | 81.16  | 37.17 | 105.09 | 45    |        |    |
| 2003                          | 8,385           |       |                    | 3,290  | 11,632 | 24    | 77.96  | 30.59 | 108.14 | 47    |        |    |
| 2004                          | 8,452           |       |                    | 3,098  | 12,924 | 24    | 76.87  | 28.18 | 117.55 | 48    |        |    |
| 2005                          | 8,540           |       |                    | 2,978  | 14,306 | 23    | 76.88  | 26.81 | 128.79 | 49    |        |    |
| 2006                          | 8,638           |       |                    | 2,837  | 15,869 | 24    | 77.58  | 25.48 | 142.53 | 47    |        |    |
| 2007                          | 8,706           | 1,572 | 17,482             | 24     | 78.48  | 14.17 | 157.58 | 46    |        |       |        |    |

| Metropolitan Statistical Area | PWID Population    | Year  | Number   | Min   | Max    | Rank  | Rate   | Min    | Max    | Rank   |        |    |
|-------------------------------|--------------------|-------|----------|-------|--------|-------|--------|--------|--------|--------|--------|----|
| Riverside--San Bernardino, CA | Non-Hispanic Black | 1992  | 2,464    | 1,405 | 3,872  | 47    | 198.11 | 112.95 | 311.24 | 77     |        |    |
|                               |                    | 1993  | 2,693    | 1,241 | 3,902  | 38    | 210.33 | 96.97  | 304.83 | 61     |        |    |
|                               |                    | 1994  | 2,108    | 1,084 | 3,173  | 49    | 160.22 | 82.42  | 241.18 | 82     |        |    |
|                               |                    | 1995  | 2,295    | 933   | 3,403  | 41    | 168.10 | 68.34  | 249.24 | 73     |        |    |
|                               |                    | 1996  | 2,130    | 948   | 3,129  | 42    | 151.61 | 67.46  | 222.71 | 77     |        |    |
|                               |                    | 1997  | 2,004    | 1,047 | 2,881  | 44    | 137.47 | 71.79  | 197.55 | 77     |        |    |
|                               |                    | 1998  | 1,914    | 1,111 | 2,643  | 46    | 126.04 | 73.20  | 174.08 | 78     |        |    |
|                               |                    | 1999  | 1,608    | 1,101 | 1,954  | 54    | 101.61 | 69.56  | 123.41 | 86     |        |    |
|                               |                    | 2000  | 1,704    | 1,024 | 2,084  | 48    | 103.87 | 62.42  | 127.01 | 81     |        |    |
|                               |                    | 2001  | 1,538    | 881   | 1,981  | 54    | 89.97  | 51.57  | 115.90 | 87     |        |    |
|                               |                    | 2002  | 1,558    | 713   | 2,017  | 52    | 87.80  | 40.21  | 113.69 | 85     |        |    |
|                               |                    | 2003  | 1,533    | 601   | 2,126  | 53    | 82.97  | 32.56  | 115.09 | 86     |        |    |
|                               |                    | 2004  | 1,554    | 570   | 2,376  | 49    | 80.40  | 29.47  | 122.95 | 86     |        |    |
|                               |                    | 2005  | 1,588    | 554   | 2,660  | 47    | 78.88  | 27.50  | 132.14 | 85     |        |    |
|                               |                    | 2006  | 1,639    | 538   | 3,011  | 46    | 78.53  | 25.80  | 144.28 | 80     |        |    |
|                               |                    | 2007  | 1,705    | 308   | 3,423  | 48    | 79.69  | 14.38  | 160.01 | 82     |        |    |
|                               |                    |       | Hispanic | 1992  | 10,905 | 6,218 | 17,133 | 5      | 217.66 | 124.10 | 341.96 | 27 |
|                               |                    |       |          | 1993  | 11,855 | 5,466 | 17,182 | 4      | 224.53 | 103.52 | 325.42 | 27 |
|                               |                    |       |          | 1994  | 9,297  | 4,782 | 13,995 | 6      | 167.50 | 86.16  | 252.14 | 33 |
|                               |                    |       |          | 1995  | 10,198 | 4,146 | 15,121 | 4      | 175.01 | 71.15  | 259.49 | 32 |
| 1996                          | 9,579              |       |          | 4,262 | 14,071 | 4     | 157.06 | 69.88  | 230.70 | 33     |        |    |
| 1997                          | 9,145              |       |          | 4,776 | 13,143 | 4     | 142.17 | 74.24  | 204.31 | 35     |        |    |
| 1998                          | 8,872              |       |          | 5,153 | 12,254 | 4     | 130.22 | 75.63  | 179.85 | 35     |        |    |
| 1999                          | 7,577              |       |          | 5,187 | 9,203  | 5     | 104.88 | 71.80  | 127.39 | 40     |        |    |
| 2000                          | 8,147              |       |          | 4,896 | 9,963  | 5     | 106.45 | 63.97  | 130.17 | 39     |        |    |
| 2001                          | 7,441              |       |          | 4,265 | 9,586  | 6     | 91.62  | 52.52  | 118.02 | 45     |        |    |
| 2002                          | 7,603              |       |          | 3,482 | 9,845  | 5     | 87.99  | 40.30  | 113.94 | 47     |        |    |
| 2003                          | 7,506              |       |          | 2,945 | 10,412 | 5     | 81.22  | 31.87  | 112.67 | 47     |        |    |
| 2004                          | 7,583              |       |          | 2,780 | 11,596 | 5     | 76.60  | 28.08  | 117.13 | 49     |        |    |
| 2005                          | 7,662              |       |          | 2,672 | 12,835 | 5     | 72.49  | 25.28  | 121.44 | 53     |        |    |
| 2006                          | 7,732              | 2,540 | 14,205   | 5     | 68.72  | 22.57 | 126.26 | 56     |        |        |        |    |
| 2007                          | 7,761              | 1,401 | 15,583   | 7     | 65.69  | 11.86 | 131.90 | 57     |        |        |        |    |

| Metropolitan Statistical Area | PWID Population | Year   | Number | Min    | Max    | Rank   | Rate   | Min    | Max    | Rank   |    |
|-------------------------------|-----------------|--------|--------|--------|--------|--------|--------|--------|--------|--------|----|
| Riverside--San Bernardino, CA | Male            | 1992   | 17,719 | 10,103 | 27,838 | 8      | 198.03 | 112.91 | 311.11 | 34     |    |
|                               |                 | 1993   | 19,282 | 8,889  | 27,945 | 9      | 213.71 | 98.52  | 309.72 | 28     |    |
|                               |                 | 1994   | 15,204 | 7,821  | 22,887 | 13     | 167.31 | 86.06  | 251.85 | 38     |    |
|                               |                 | 1995   | 16,832 | 6,843  | 24,956 | 12     | 182.88 | 74.35  | 271.16 | 34     |    |
|                               |                 | 1996   | 15,997 | 7,117  | 23,498 | 13     | 171.96 | 76.51  | 252.59 | 35     |    |
|                               |                 | 1997   | 15,474 | 8,081  | 22,238 | 13     | 162.67 | 84.95  | 233.77 | 37     |    |
|                               |                 | 1998   | 15,216 | 8,837  | 21,015 | 13     | 155.50 | 90.31  | 214.77 | 38     |    |
|                               |                 | 1999   | 13,161 | 9,010  | 15,986 | 18     | 130.35 | 89.23  | 158.32 | 45     |    |
|                               |                 | 2000   | 14,308 | 8,598  | 17,496 | 15     | 137.17 | 82.43  | 167.73 | 43     |    |
|                               |                 | 2001   | 13,174 | 7,552  | 16,972 | 17     | 121.21 | 69.48  | 156.14 | 55     |    |
|                               |                 | 2002   | 13,518 | 6,191  | 17,505 | 18     | 119.77 | 54.85  | 155.09 | 47     |    |
|                               |                 | 2003   | 13,339 | 5,234  | 18,503 | 17     | 113.11 | 44.38  | 156.90 | 56     |    |
|                               |                 | 2004   | 13,390 | 4,909  | 20,475 | 17     | 108.22 | 39.67  | 165.48 | 57     |    |
|                               |                 | 2005   | 13,347 | 4,654  | 22,360 | 17     | 103.51 | 36.09  | 173.41 | 58     |    |
|                               | 2006            | 13,179 | 4,329  | 24,213 | 17     | 98.60  | 32.39  | 181.15 | 60     |        |    |
|                               | 2007            | 12,819 | 2,314  | 25,740 | 18     | 93.50  | 16.88  | 187.74 | 64     |        |    |
|                               |                 | Female | 1992   | 11,749 | 6,699  | 18,459 | 6      | 135.45 | 77.23  | 212.80 | 18 |
|                               |                 |        | 1993   | 13,065 | 6,023  | 18,934 | 6      | 149.27 | 68.82  | 216.34 | 12 |
|                               |                 |        | 1994   | 10,389 | 5,344  | 15,639 | 9      | 117.44 | 60.41  | 176.78 | 20 |
|                               |                 |        | 1995   | 11,472 | 4,664  | 17,009 | 7      | 128.07 | 52.07  | 189.89 | 15 |
|                               |                 |        | 1996   | 10,778 | 4,795  | 15,832 | 7      | 118.80 | 52.86  | 174.51 | 15 |
|                               |                 |        | 1997   | 10,236 | 5,345  | 14,711 | 8      | 110.03 | 57.46  | 158.13 | 16 |
|                               |                 |        | 1998   | 9,836  | 5,713  | 13,585 | 9      | 102.57 | 59.57  | 141.67 | 20 |
|                               |                 |        | 1999   | 8,291  | 5,676  | 10,070 | 14     | 83.56  | 57.20  | 101.49 | 41 |
|                               |                 |        | 2000   | 8,777  | 5,274  | 10,732 | 17     | 85.60  | 51.44  | 104.68 | 36 |
|                               |                 |        | 2001   | 7,880  | 4,517  | 10,151 | 19     | 74.09  | 42.47  | 95.45  | 52 |
|                               | 2002            |        | 7,909  | 3,622  | 10,242 | 17     | 71.42  | 32.71  | 92.49  | 48     |    |
|                               | 2003            |        | 7,675  | 3,011  | 10,646 | 17     | 66.25  | 26.00  | 91.90  | 53     |    |
|                               | 2004            | 7,632  | 2,798  | 11,671 | 16     | 63.03  | 23.10  | 96.38  | 58     |        |    |
|                               | 2005            | 7,608  | 2,653  | 12,745 | 17     | 60.51  | 21.10  | 101.36 | 58     |        |    |
|                               | 2006            | 7,600  | 2,497  | 13,963 | 16     | 58.43  | 19.19  | 107.35 | 59     |        |    |
|                               | 2007            | 7,583  | 1,369  | 15,227 | 16     | 56.95  | 10.28  | 114.35 | 59     |        |    |

| Metropolitan Statistical Area | PWID Population | Year  | Number      | Min    | Max    | Rank   | Rate   | Min   | Max    | Rank   |        |    |
|-------------------------------|-----------------|-------|-------------|--------|--------|--------|--------|-------|--------|--------|--------|----|
| Riverside--San Bernardino, CA | Young (15-29)   | 1992  | 8,677       | 4,947  | 13,632 | 6      | 138.25 | 78.83 | 217.21 | 22     |        |    |
|                               |                 | 1993  | 8,872       | 4,090  | 12,859 | 6      | 142.88 | 65.87 | 207.07 | 19     |        |    |
|                               |                 | 1994  | 6,548       | 3,368  | 9,856  | 13     | 106.33 | 54.70 | 160.06 | 35     |        |    |
|                               |                 | 1995  | 6,772       | 2,753  | 10,041 | 11     | 109.75 | 44.62 | 162.72 | 32     |        |    |
|                               |                 | 1996  | 6,017       | 2,677  | 8,839  | 14     | 96.92  | 43.12 | 142.37 | 43     |        |    |
|                               |                 | 1997  | 5,460       | 2,851  | 7,846  | 17     | 86.17  | 45.00 | 123.84 | 49     |        |    |
|                               |                 | 1998  | 5,065       | 2,942  | 6,996  | 19     | 77.65  | 45.10 | 107.24 | 57     |        |    |
|                               |                 | 1999  | 4,169       | 2,854  | 5,064  | 24     | 61.88  | 42.36 | 75.16  | 67     |        |    |
|                               |                 | 2000  | 4,361       | 2,621  | 5,332  | 24     | 62.59  | 37.61 | 76.53  | 69     |        |    |
|                               |                 | 2001  | 3,916       | 2,244  | 5,044  | 31     | 53.14  | 30.46 | 68.46  | 84     |        |    |
|                               |                 | 2002  | 3,981       | 1,823  | 5,154  | 31     | 51.22  | 23.46 | 66.33  | 83     |        |    |
|                               |                 | 2003  | 3,962       | 1,555  | 5,496  | 32     | 47.89  | 18.79 | 66.43  | 92     |        |    |
|                               |                 | 2004  | 4,093       | 1,500  | 6,258  | 31     | 46.30  | 16.97 | 70.80  | 98     |        |    |
|                               |                 | 2005  | 4,290       | 1,496  | 7,187  | 32     | 45.85  | 15.99 | 76.81  | 99     |        |    |
|                               |                 | 2006  | 4,559       | 1,498  | 8,375  | 27     | 46.40  | 15.24 | 85.24  | 99     |        |    |
|                               |                 | 2007  | 4,888       | 882    | 9,815  | 26     | 48.30  | 8.72  | 96.98  | 98     |        |    |
|                               |                 |       | Old (30-64) | 1992   | 21,238 | 12,109 | 33,366 | 9     | 187.18 | 106.72 | 294.08 | 27 |
|                               |                 |       |             | 1993   | 23,749 | 10,949 | 34,419 | 9     | 205.35 | 94.67  | 297.61 | 20 |
|                               |                 |       |             | 1994   | 19,161 | 9,857  | 28,844 | 13    | 162.71 | 83.70  | 244.94 | 33 |
|                               |                 |       |             | 1995   | 21,606 | 8,784  | 32,035 | 13    | 180.19 | 73.26  | 267.17 | 22 |
| 1996                          | 20,815          |       |             | 9,261  | 30,575 | 14     | 171.08 | 76.12 | 251.31 | 22     |        |    |
| 1997                          | 20,316          |       |             | 10,609 | 29,195 | 14     | 162.79 | 85.01 | 233.94 | 22     |        |    |
| 1998                          | 20,068          |       |             | 11,655 | 27,716 | 14     | 156.16 | 90.70 | 215.68 | 24     |        |    |
| 1999                          | 17,368          |       |             | 11,890 | 21,095 | 14     | 130.77 | 89.52 | 158.83 | 35     |        |    |
| 2000                          | 18,827          |       |             | 11,314 | 23,022 | 14     | 137.26 | 82.48 | 167.84 | 27     |        |    |
| 2001                          | 17,234          |       |             | 9,879  | 22,201 | 15     | 121.91 | 69.88 | 157.05 | 38     |        |    |
| 2002                          | 17,533          |       |             | 8,029  | 22,703 | 16     | 120.17 | 55.03 | 155.61 | 34     |        |    |
| 2003                          | 17,107          |       |             | 6,712  | 23,730 | 16     | 113.26 | 44.44 | 157.11 | 34     |        |    |
| 2004                          | 16,929          |       |             | 6,206  | 25,887 | 16     | 108.23 | 39.67 | 165.49 | 33     |        |    |
| 2005                          | 16,566          |       |             | 5,776  | 27,752 | 16     | 102.82 | 35.85 | 172.25 | 35     |        |    |
| 2006                          | 15,953          | 5,241 | 29,310      | 16     | 96.41  | 31.67  | 177.13 | 38    |        |        |        |    |
| 2007                          | 14,976          | 2,703 | 30,070      | 16     | 88.58  | 15.99  | 177.87 | 40    |        |        |        |    |

| Metropolitan Statistical Area | PWID Population | Year  | Number             | Min   | Max    | Rank  | Rate  | Min   | Max    | Rank  |       |    |
|-------------------------------|-----------------|-------|--------------------|-------|--------|-------|-------|-------|--------|-------|-------|----|
| Rochester, NY                 | Total           | 1992  | 5,536              | 3,147 | 8,426  | 72    | 77.79 | 44.21 | 118.39 | 73    |       |    |
|                               |                 | 1993  | 4,872              | 3,030 | 8,290  | 77    | 68.20 | 42.42 | 116.05 | 79    |       |    |
|                               |                 | 1994  | 5,417              | 3,129 | 8,132  | 75    | 75.90 | 43.85 | 113.95 | 76    |       |    |
|                               |                 | 1995  | 4,870              | 3,113 | 7,969  | 78    | 68.36 | 43.69 | 111.85 | 76    |       |    |
|                               |                 | 1996  | 4,903              | 3,113 | 7,879  | 78    | 68.68 | 43.61 | 110.38 | 74    |       |    |
|                               |                 | 1997  | 4,945              | 3,116 | 7,798  | 78    | 69.06 | 43.52 | 108.91 | 72    |       |    |
|                               |                 | 1998  | 5,014              | 3,145 | 7,795  | 79    | 69.77 | 43.76 | 108.46 | 69    |       |    |
|                               |                 | 1999  | 5,277              | 3,168 | 7,777  | 78    | 73.29 | 44.00 | 108.02 | 69    |       |    |
|                               |                 | 2000  | 5,251              | 3,294 | 8,068  | 75    | 72.39 | 45.40 | 111.22 | 67    |       |    |
|                               |                 | 2001  | 5,548              | 3,412 | 8,343  | 77    | 76.09 | 46.80 | 114.43 | 65    |       |    |
|                               |                 | 2002  | 5,749              | 3,549 | 9,115  | 71    | 78.43 | 48.42 | 124.36 | 63    |       |    |
|                               |                 | 2003  | 6,057              | 3,682 | 9,881  | 68    | 82.32 | 50.04 | 134.29 | 59    |       |    |
|                               |                 | 2004  | 6,375              | 3,822 | 10,700 | 66    | 86.27 | 51.71 | 144.78 | 56    |       |    |
|                               |                 | 2005  | 6,684              | 3,955 | 11,504 | 60    | 90.22 | 53.39 | 155.28 | 54    |       |    |
|                               |                 | 2006  | 7,015              | 4,104 | 12,366 | 56    | 94.33 | 55.18 | 166.29 | 49    |       |    |
|                               |                 | 2007  | 7,343              | 4,251 | 13,228 | 56    | 98.42 | 56.98 | 177.30 | 41    |       |    |
|                               |                 |       | Non-Hispanic White | 1992  | 2,448  | 1,391 | 3,725 | 77    | 39.98  | 22.73 | 60.86 | 86 |
|                               |                 |       |                    | 1993  | 2,106  | 1,310 | 3,583 | 77    | 34.42  | 21.41 | 58.57 | 88 |
|                               |                 |       |                    | 1994  | 2,310  | 1,334 | 3,467 | 78    | 37.96  | 21.93 | 56.98 | 87 |
|                               |                 |       |                    | 1995  | 2,064  | 1,319 | 3,377 | 80    | 34.12  | 21.80 | 55.82 | 87 |
| 1996                          | 2,079           |       |                    | 1,320 | 3,341  | 81    | 34.44 | 21.87 | 55.34  | 87    |       |    |
| 1997                          | 2,108           |       |                    | 1,329 | 3,325  | 80    | 34.96 | 22.03 | 55.13  | 86    |       |    |
| 1998                          | 2,158           |       |                    | 1,354 | 3,355  | 79    | 35.77 | 22.44 | 55.62  | 83    |       |    |
| 1999                          | 2,297           |       |                    | 1,379 | 3,385  | 82    | 38.14 | 22.90 | 56.21  | 87    |       |    |
| 2000                          | 2,315           |       |                    | 1,452 | 3,556  | 79    | 38.31 | 24.03 | 58.86  | 83    |       |    |
| 2001                          | 2,475           |       |                    | 1,522 | 3,722  | 81    | 40.84 | 25.12 | 61.41  | 84    |       |    |
| 2002                          | 2,593           |       |                    | 1,601 | 4,111  | 78    | 42.66 | 26.33 | 67.64  | 80    |       |    |
| 2003                          | 2,755           |       |                    | 1,674 | 4,494  | 75    | 45.27 | 27.51 | 73.84  | 79    |       |    |
| 2004                          | 2,913           |       |                    | 1,746 | 4,889  | 75    | 47.76 | 28.63 | 80.16  | 79    |       |    |
| 2005                          | 3,054           |       |                    | 1,807 | 5,256  | 74    | 50.03 | 29.61 | 86.11  | 77    |       |    |
| 2006                          | 3,188           |       |                    | 1,865 | 5,619  | 75    | 52.16 | 30.51 | 91.95  | 77    |       |    |
| 2007                          | 3,297           | 1,909 | 5,939              | 74    | 53.90  | 31.20 | 97.10 | 76    |        |       |       |    |

| Metropolitan Statistical Area | PWID Population    | Year  | Number   | Min   | Max    | Rank   | Rate   | Min    | Max    | Rank   |        |    |
|-------------------------------|--------------------|-------|----------|-------|--------|--------|--------|--------|--------|--------|--------|----|
| Rochester, NY                 | Non-Hispanic Black | 1992  | 2,195    | 1,248 | 3,341  | 52     | 345.07 | 196.14 | 525.20 | 42     |        |    |
|                               |                    | 1993  | 1,880    | 1,169 | 3,198  | 53     | 289.32 | 179.95 | 492.30 | 48     |        |    |
|                               |                    | 1994  | 1,995    | 1,153 | 2,996  | 54     | 301.88 | 174.40 | 453.19 | 42     |        |    |
|                               |                    | 1995  | 1,684    | 1,076 | 2,755  | 55     | 251.42 | 160.69 | 411.35 | 49     |        |    |
|                               |                    | 1996  | 1,568    | 996   | 2,520  | 58     | 230.34 | 146.24 | 370.17 | 49     |        |    |
|                               |                    | 1997  | 1,445    | 911   | 2,280  | 60     | 208.77 | 131.58 | 329.25 | 51     |        |    |
|                               |                    | 1998  | 1,328    | 833   | 2,064  | 60     | 188.54 | 118.26 | 293.10 | 52     |        |    |
|                               |                    | 1999  | 1,260    | 757   | 1,857  | 62     | 176.87 | 106.19 | 260.67 | 61     |        |    |
|                               |                    | 2000  | 1,131    | 709   | 1,738  | 63     | 155.74 | 97.68  | 239.28 | 61     |        |    |
|                               |                    | 2001  | 1,084    | 667   | 1,630  | 64     | 147.83 | 90.92  | 222.30 | 67     |        |    |
|                               |                    | 2002  | 1,031    | 636   | 1,635  | 63     | 138.77 | 85.67  | 220.04 | 62     |        |    |
|                               |                    | 2003  | 1,015    | 617   | 1,656  | 63     | 135.02 | 82.07  | 220.25 | 60     |        |    |
|                               |                    | 2004  | 1,023    | 613   | 1,717  | 64     | 134.48 | 80.62  | 225.70 | 59     |        |    |
|                               |                    | 2005  | 1,059    | 627   | 1,823  | 65     | 138.00 | 81.67  | 237.52 | 56     |        |    |
|                               |                    | 2006  | 1,139    | 666   | 2,007  | 64     | 146.42 | 85.66  | 258.12 | 53     |        |    |
|                               |                    | 2007  | 1,273    | 737   | 2,293  | 59     | 161.68 | 93.60  | 291.27 | 47     |        |    |
|                               |                    |       | Hispanic | 1992  | 801    | 455    | 1,219  | 44     | 360.09 | 204.68 | 548.07 | 13 |
|                               |                    |       |          | 1993  | 798    | 496    | 1,357  | 45     | 342.63 | 213.10 | 583.00 | 11 |
|                               |                    |       |          | 1994  | 982    | 567    | 1,475  | 40     | 405.44 | 234.22 | 608.65 | 9  |
|                               |                    |       |          | 1995  | 959    | 613    | 1,570  | 41     | 382.56 | 244.50 | 625.91 | 8  |
| 1996                          | 1,031              |       |          | 655   | 1,657  | 41     | 395.85 | 251.33 | 636.16 | 7      |        |    |
| 1997                          | 1,094              |       |          | 689   | 1,725  | 41     | 404.89 | 255.18 | 638.54 | 6      |        |    |
| 1998                          | 1,152              |       |          | 723   | 1,791  | 41     | 412.12 | 258.51 | 640.68 | 6      |        |    |
| 1999                          | 1,245              |       |          | 747   | 1,834  | 40     | 432.96 | 259.94 | 638.09 | 6      |        |    |
| 2000                          | 1,260              |       |          | 790   | 1,935  | 40     | 418.92 | 262.74 | 643.64 | 7      |        |    |
| 2001                          | 1,343              |       |          | 826   | 2,020  | 41     | 438.37 | 269.62 | 659.22 | 6      |        |    |
| 2002                          | 1,396              |       |          | 862   | 2,214  | 39     | 444.77 | 274.58 | 705.24 | 6      |        |    |
| 2003                          | 1,469              |       |          | 893   | 2,396  | 39     | 455.52 | 276.88 | 743.10 | 6      |        |    |
| 2004                          | 1,540              |       |          | 923   | 2,584  | 39     | 467.85 | 280.46 | 785.21 | 6      |        |    |
| 2005                          | 1,606              |       |          | 951   | 2,765  | 39     | 480.32 | 284.25 | 826.71 | 6      |        |    |
| 2006                          | 1,679              | 982   | 2,960    | 39    | 490.54 | 286.97 | 864.75 | 4      |        |        |        |    |
| 2007                          | 1,756              | 1,017 | 3,164    | 39    | 500.05 | 289.48 | 900.83 | 2      |        |        |        |    |

| Metropolitan Statistical Area | PWID Population | Year   | Number | Min   | Max   | Rank   | Rate   | Min    | Max    | Rank  |    |
|-------------------------------|-----------------|--------|--------|-------|-------|--------|--------|--------|--------|-------|----|
| Rochester, NY                 | Male            | 1992   | 3,746  | 2,129 | 5,702 | 72     | 106.89 | 60.76  | 162.69 | 72    |    |
|                               |                 | 1993   | 3,257  | 2,026 | 5,542 | 79     | 92.52  | 57.54  | 157.43 | 76    |    |
|                               |                 | 1994   | 3,593  | 2,075 | 5,393 | 75     | 102.09 | 58.98  | 153.26 | 76    |    |
|                               |                 | 1995   | 3,217  | 2,056 | 5,263 | 78     | 91.53  | 58.50  | 149.75 | 76    |    |
|                               |                 | 1996   | 3,236  | 2,054 | 5,200 | 78     | 91.88  | 58.33  | 147.66 | 74    |    |
|                               |                 | 1997   | 3,270  | 2,061 | 5,157 | 76     | 92.54  | 58.32  | 145.94 | 69    |    |
|                               |                 | 1998   | 3,331  | 2,089 | 5,179 | 75     | 93.90  | 58.90  | 145.97 | 66    |    |
|                               |                 | 1999   | 3,527  | 2,118 | 5,198 | 75     | 99.27  | 59.60  | 146.30 | 64    |    |
|                               |                 | 2000   | 3,535  | 2,217 | 5,432 | 72     | 98.73  | 61.92  | 151.69 | 64    |    |
|                               |                 | 2001   | 3,764  | 2,315 | 5,660 | 72     | 104.56 | 64.31  | 157.24 | 60    |    |
|                               |                 | 2002   | 3,930  | 2,426 | 6,232 | 66     | 108.62 | 67.06  | 172.24 | 58    |    |
|                               |                 | 2003   | 4,171  | 2,535 | 6,804 | 60     | 114.74 | 69.74  | 187.17 | 53    |    |
|                               |                 | 2004   | 4,417  | 2,648 | 7,413 | 57     | 120.89 | 72.47  | 202.90 | 46    |    |
|                               |                 | 2005   | 4,653  | 2,754 | 8,008 | 55     | 126.90 | 75.10  | 218.41 | 42    |    |
|                               | 2006            | 4,897  | 2,865  | 8,633 | 52    | 133.02 | 77.82  | 234.50 | 38     |       |    |
|                               | 2007            | 5,129  | 2,969  | 9,239 | 51    | 138.68 | 80.28  | 249.82 | 34     |       |    |
|                               |                 | Female | 1992   | 1,737 | 987   | 2,643  | 73     | 48.08  | 27.33  | 73.18 | 77 |
|                               |                 |        | 1993   | 1,606 | 999   | 2,733  | 77     | 44.34  | 27.58  | 75.44 | 81 |
|                               |                 |        | 1994   | 1,849 | 1,068 | 2,776  | 72     | 51.12  | 29.53  | 76.75 | 78 |
|                               |                 |        | 1995   | 1,700 | 1,086 | 2,781  | 78     | 47.09  | 30.09  | 77.04 | 77 |
|                               |                 |        | 1996   | 1,731 | 1,099 | 2,781  | 78     | 47.85  | 30.38  | 76.90 | 78 |
|                               |                 |        | 1997   | 1,749 | 1,102 | 2,758  | 78     | 48.23  | 30.40  | 76.06 | 75 |
|                               |                 |        | 1998   | 1,764 | 1,106 | 2,742  | 78     | 48.46  | 30.39  | 75.33 | 73 |
|                               |                 |        | 1999   | 1,834 | 1,101 | 2,703  | 80     | 50.29  | 30.19  | 74.12 | 74 |
|                               |                 |        | 2000   | 1,795 | 1,126 | 2,758  | 78     | 48.86  | 30.64  | 75.07 | 73 |
|                               |                 |        | 2001   | 1,858 | 1,143 | 2,794  | 79     | 50.34  | 30.96  | 75.70 | 76 |
|                               | 2002            |        | 1,883  | 1,162 | 2,985 | 76     | 50.73  | 31.32  | 80.43  | 71    |    |
|                               | 2003            |        | 1,939  | 1,178 | 3,163 | 76     | 52.07  | 31.65  | 84.94  | 69    |    |
|                               | 2004            | 1,996  | 1,196  | 3,350 | 76    | 53.42  | 32.02  | 89.65  | 67     |       |    |
|                               | 2005            | 2,052  | 1,214  | 3,532 | 75    | 54.84  | 32.45  | 94.39  | 64     |       |    |
|                               | 2006            | 2,121  | 1,241  | 3,739 | 71    | 56.49  | 33.04  | 99.58  | 61     |       |    |
|                               | 2007            | 2,200  | 1,274  | 3,963 | 73    | 58.47  | 33.85  | 105.33 | 56     |       |    |

| Metropolitan Statistical Area | PWID Population | Year  | Number      | Min   | Max   | Rank  | Rate   | Min   | Max    | Rank  |        |    |
|-------------------------------|-----------------|-------|-------------|-------|-------|-------|--------|-------|--------|-------|--------|----|
| Rochester, NY                 | Young (15-29)   | 1992  | 981         | 558   | 1,494 | 81    | 41.05  | 23.33 | 62.48  | 89    |        |    |
|                               |                 | 1993  | 965         | 600   | 1,643 | 80    | 41.14  | 25.59 | 70.00  | 83    |        |    |
|                               |                 | 1994  | 1,186       | 685   | 1,781 | 79    | 51.66  | 29.85 | 77.56  | 75    |        |    |
|                               |                 | 1995  | 1,166       | 745   | 1,908 | 77    | 51.86  | 33.14 | 84.84  | 69    |        |    |
|                               |                 | 1996  | 1,272       | 808   | 2,045 | 73    | 57.43  | 36.46 | 92.29  | 65    |        |    |
|                               |                 | 1997  | 1,379       | 869   | 2,175 | 72    | 62.93  | 39.66 | 99.24  | 61    |        |    |
|                               |                 | 1998  | 1,492       | 936   | 2,320 | 71    | 68.67  | 43.07 | 106.75 | 60    |        |    |
|                               |                 | 1999  | 1,665       | 999   | 2,453 | 69    | 77.38  | 46.46 | 114.04 | 59    |        |    |
|                               |                 | 2000  | 1,746       | 1,095 | 2,683 | 65    | 81.29  | 50.99 | 124.90 | 56    |        |    |
|                               |                 | 2001  | 1,935       | 1,190 | 2,910 | 67    | 89.49  | 55.04 | 134.58 | 53    |        |    |
|                               |                 | 2002  | 2,094       | 1,293 | 3,320 | 62    | 95.74  | 59.10 | 151.80 | 52    |        |    |
|                               |                 | 2003  | 2,296       | 1,396 | 3,746 | 58    | 103.49 | 62.90 | 168.82 | 49    |        |    |
|                               |                 | 2004  | 2,507       | 1,503 | 4,207 | 55    | 110.92 | 66.49 | 186.15 | 42    |        |    |
|                               |                 | 2005  | 2,720       | 1,609 | 4,681 | 53    | 118.14 | 69.91 | 203.34 | 33    |        |    |
|                               |                 | 2006  | 2,947       | 1,724 | 5,195 | 47    | 125.76 | 73.57 | 221.70 | 29    |        |    |
|                               |                 | 2007  | 3,180       | 1,841 | 5,728 | 43    | 133.44 | 77.25 | 240.40 | 27    |        |    |
|                               |                 |       | Old (30-64) | 1992  | 4,629 | 2,631 | 7,046  | 66    | 97.96  | 55.68 | 149.10 | 67 |
|                               |                 |       |             | 1993  | 3,965 | 2,466 | 6,747  | 73    | 82.66  | 51.41 | 140.65 | 73 |
|                               |                 |       |             | 1994  | 4,295 | 2,481 | 6,447  | 69    | 88.72  | 51.25 | 133.18 | 74 |
|                               |                 |       |             | 1995  | 3,766 | 2,407 | 6,161  | 77    | 77.25  | 49.37 | 126.38 | 75 |
| 1996                          | 3,702           |       |             | 2,350 | 5,949 | 77    | 75.20  | 47.75 | 120.86 | 74    |        |    |
| 1997                          | 3,650           |       |             | 2,300 | 5,756 | 78    | 73.45  | 46.30 | 115.84 | 74    |        |    |
| 1998                          | 3,620           |       |             | 2,271 | 5,627 | 78    | 72.19  | 45.28 | 112.23 | 72    |        |    |
| 1999                          | 3,725           |       |             | 2,237 | 5,490 | 75    | 73.79  | 44.30 | 108.75 | 76    |        |    |
| 2000                          | 3,622           |       |             | 2,272 | 5,565 | 77    | 70.93  | 44.49 | 108.99 | 67    |        |    |
| 2001                          | 3,732           |       |             | 2,296 | 5,613 | 76    | 72.78  | 44.76 | 109.44 | 71    |        |    |
| 2002                          | 3,762           |       |             | 2,323 | 5,966 | 73    | 73.16  | 45.17 | 116.01 | 62    |        |    |
| 2003                          | 3,842           |       |             | 2,335 | 6,267 | 68    | 74.74  | 45.43 | 121.93 | 59    |        |    |
| 2004                          | 3,897           |       |             | 2,336 | 6,540 | 67    | 75.96  | 45.54 | 127.49 | 57    |        |    |
| 2005                          | 3,908           |       |             | 2,313 | 6,727 | 65    | 76.54  | 45.30 | 131.74 | 54    |        |    |
| 2006                          | 3,885           | 2,273 | 6,849       | 66    | 76.29 | 44.63 | 134.49 | 53    |        |       |        |    |
| 2007                          | 3,803           | 2,202 | 6,852       | 65    | 74.90 | 43.36 | 134.93 | 54    |        |       |        |    |



| Metropolitan Statistical Area | PWID Population | Year  | Number             | Min    | Max    | Rank  | Rate   | Min    | Max    | Rank   |        |    |
|-------------------------------|-----------------|-------|--------------------|--------|--------|-------|--------|--------|--------|--------|--------|----|
| Sacramento, CA                | Total           | 1992  | 18,817             | 14,515 | 25,762 | 24    | 198.97 | 153.48 | 272.41 | 16     |        |    |
|                               |                 | 1993  | 19,558             | 14,919 | 25,414 | 24    | 206.07 | 157.19 | 267.77 | 13     |        |    |
|                               |                 | 1994  | 16,364             | 15,117 | 18,671 | 29    | 172.07 | 158.96 | 196.34 | 19     |        |    |
|                               |                 | 1995  | 17,515             | 14,668 | 23,196 | 25    | 182.25 | 152.64 | 241.38 | 14     |        |    |
|                               |                 | 1996  | 16,947             | 14,210 | 22,178 | 24    | 173.91 | 145.82 | 227.60 | 14     |        |    |
|                               |                 | 1997  | 16,845             | 13,840 | 21,270 | 24    | 169.19 | 139.01 | 213.63 | 14     |        |    |
|                               |                 | 1998  | 17,127             | 13,466 | 20,379 | 22    | 167.81 | 131.94 | 199.67 | 11     |        |    |
|                               |                 | 1999  | 16,607             | 13,085 | 18,948 | 24    | 158.49 | 124.88 | 180.83 | 17     |        |    |
|                               |                 | 2000  | 17,154             | 12,385 | 19,934 | 22    | 159.29 | 115.01 | 185.10 | 13     |        |    |
|                               |                 | 2001  | 16,467             | 11,755 | 21,182 | 22    | 147.30 | 105.15 | 189.47 | 20     |        |    |
|                               |                 | 2002  | 16,269             | 10,989 | 22,477 | 22    | 140.38 | 94.82  | 193.95 | 20     |        |    |
|                               |                 | 2003  | 16,163             | 10,079 | 23,681 | 22    | 135.50 | 84.49  | 198.52 | 25     |        |    |
|                               |                 | 2004  | 16,127             | 9,049  | 24,830 | 22    | 131.98 | 74.06  | 203.21 | 25     |        |    |
|                               |                 | 2005  | 15,754             | 7,911  | 25,862 | 23    | 126.71 | 63.63  | 208.01 | 25     |        |    |
|                               |                 | 2006  | 14,771             | 6,727  | 26,820 | 26    | 117.25 | 53.40  | 212.90 | 29     |        |    |
|                               |                 | 2007  | 13,688             | 5,508  | 27,786 | 30    | 107.29 | 43.17  | 217.80 | 35     |        |    |
|                               |                 |       | Non-Hispanic White | 1992   | 11,406 | 8,798 | 15,615 | 18     | 167.45 | 129.17 | 229.26 | 15 |
|                               |                 |       |                    | 1993   | 11,557 | 8,816 | 15,017 | 16     | 171.10 | 130.52 | 222.34 | 9  |
|                               |                 |       |                    | 1994   | 9,491  | 8,768 | 10,830 | 23     | 141.76 | 130.96 | 161.75 | 20 |
|                               |                 |       |                    | 1995   | 10,032 | 8,401 | 13,286 | 20     | 149.72 | 125.39 | 198.29 | 14 |
| 1996                          | 9,631           |       |                    | 8,076  | 12,604 | 20    | 143.12 | 120.00 | 187.30 | 14     |        |    |
| 1997                          | 9,534           |       |                    | 7,833  | 12,038 | 21    | 139.73 | 114.81 | 176.44 | 14     |        |    |
| 1998                          | 9,675           |       |                    | 7,607  | 11,512 | 20    | 139.31 | 109.53 | 165.76 | 12     |        |    |
| 1999                          | 9,373           |       |                    | 7,385  | 10,695 | 20    | 132.38 | 104.31 | 151.05 | 19     |        |    |
| 2000                          | 9,671           |       |                    | 6,983  | 11,239 | 20    | 133.93 | 96.70  | 155.63 | 14     |        |    |
| 2001                          | 9,260           |       |                    | 6,610  | 11,912 | 21    | 124.79 | 89.08  | 160.52 | 19     |        |    |
| 2002                          | 9,101           |       |                    | 6,147  | 12,573 | 22    | 119.77 | 80.90  | 165.47 | 18     |        |    |
| 2003                          | 8,957           |       |                    | 5,586  | 13,124 | 21    | 115.76 | 72.18  | 169.60 | 20     |        |    |
| 2004                          | 8,807           |       |                    | 4,942  | 13,560 | 22    | 112.54 | 63.15  | 173.27 | 25     |        |    |
| 2005                          | 8,422           |       |                    | 4,229  | 13,825 | 26    | 107.05 | 53.76  | 175.73 | 27     |        |    |
| 2006                          | 7,666           |       |                    | 3,491  | 13,919 | 27    | 97.28  | 44.31  | 176.64 | 39     |        |    |
| 2007                          | 6,828           | 2,747 | 13,860             | 31     | 86.46  | 34.79 | 175.52 | 43     |        |        |        |    |

| Metropolitan Statistical Area | PWID Population    | Year | Number   | Min   | Max    | Rank  | Rate   | Min    | Max    | Rank   |        |    |
|-------------------------------|--------------------|------|----------|-------|--------|-------|--------|--------|--------|--------|--------|----|
| Sacramento, CA                | Non-Hispanic Black | 1992 | 2,536    | 1,957 | 3,473  | 46    | 358.39 | 276.45 | 490.66 | 38     |        |    |
|                               |                    | 1993 | 2,875    | 2,193 | 3,735  | 34    | 400.09 | 305.20 | 519.89 | 26     |        |    |
|                               |                    | 1994 | 2,542    | 2,348 | 2,900  | 40    | 350.63 | 323.91 | 400.08 | 32     |        |    |
|                               |                    | 1995 | 2,802    | 2,346 | 3,710  | 32    | 379.49 | 317.81 | 502.59 | 18     |        |    |
|                               |                    | 1996 | 2,735    | 2,293 | 3,579  | 32    | 362.38 | 303.85 | 474.24 | 18     |        |    |
|                               |                    | 1997 | 2,699    | 2,217 | 3,408  | 31    | 348.33 | 286.19 | 439.83 | 17     |        |    |
|                               |                    | 1998 | 2,694    | 2,118 | 3,205  | 29    | 338.41 | 266.07 | 402.66 | 15     |        |    |
|                               |                    | 1999 | 2,546    | 2,006 | 2,905  | 35    | 311.11 | 245.13 | 354.97 | 17     |        |    |
|                               |                    | 2000 | 2,558    | 1,847 | 2,973  | 27    | 304.30 | 219.71 | 353.62 | 12     |        |    |
|                               |                    | 2001 | 2,394    | 1,709 | 3,080  | 35    | 274.56 | 195.99 | 353.18 | 19     |        |    |
|                               |                    | 2002 | 2,323    | 1,569 | 3,209  | 29    | 256.81 | 173.46 | 354.80 | 18     |        |    |
|                               |                    | 2003 | 2,293    | 1,430 | 3,360  | 31    | 245.51 | 153.09 | 359.71 | 19     |        |    |
|                               |                    | 2004 | 2,312    | 1,297 | 3,560  | 31    | 239.50 | 134.39 | 368.74 | 19     |        |    |
|                               |                    | 2005 | 2,333    | 1,172 | 3,830  | 31    | 234.87 | 117.94 | 385.56 | 19     |        |    |
|                               |                    | 2006 | 2,321    | 1,057 | 4,214  | 31    | 227.78 | 103.74 | 413.59 | 22     |        |    |
|                               |                    | 2007 | 2,353    | 947   | 4,777  | 29    | 225.62 | 90.78  | 457.99 | 26     |        |    |
|                               |                    |      | Hispanic | 1992  | 3,169  | 2,444 | 4,338  | 26     | 293.80 | 226.63 | 402.24 | 18 |
|                               |                    |      |          | 1993  | 3,151  | 2,404 | 4,095  | 25     | 281.44 | 214.69 | 365.71 | 19 |
|                               |                    |      |          | 1994  | 2,533  | 2,340 | 2,890  | 28     | 218.86 | 202.18 | 249.72 | 25 |
|                               |                    |      |          | 1995  | 2,617  | 2,192 | 3,466  | 31     | 218.28 | 182.81 | 289.09 | 23 |
| 1996                          | 2,456              |      |          | 2,059 | 3,214  | 31    | 196.89 | 165.09 | 257.66 | 25     |        |    |
| 1997                          | 2,382              |      |          | 1,957 | 3,007  | 31    | 183.04 | 150.38 | 231.12 | 24     |        |    |
| 1998                          | 2,377              |      |          | 1,869 | 2,828  | 29    | 174.59 | 137.27 | 207.74 | 23     |        |    |
| 1999                          | 2,277              |      |          | 1,794 | 2,598  | 32    | 160.02 | 126.08 | 182.58 | 22     |        |    |
| 2000                          | 2,341              |      |          | 1,691 | 2,721  | 29    | 156.76 | 113.19 | 182.17 | 24     |        |    |
| 2001                          | 2,256              |      |          | 1,610 | 2,902  | 32    | 141.05 | 100.69 | 181.44 | 25     |        |    |
| 2002                          | 2,256              |      |          | 1,524 | 3,117  | 31    | 131.89 | 89.08  | 182.22 | 28     |        |    |
| 2003                          | 2,292              |      |          | 1,429 | 3,358  | 31    | 126.90 | 79.13  | 185.93 | 29     |        |    |
| 2004                          | 2,363              |      |          | 1,326 | 3,639  | 28    | 124.49 | 69.86  | 191.68 | 29     |        |    |
| 2005                          | 2,414              |      |          | 1,212 | 3,963  | 28    | 121.90 | 61.21  | 200.11 | 27     |        |    |
| 2006                          | 2,398              |      |          | 1,092 | 4,354  | 29    | 116.55 | 53.08  | 211.62 | 31     |        |    |
| 2007                          | 2,386              | 960  | 4,844    | 29    | 111.89 | 45.02 | 227.13 | 31     |        |        |        |    |

| Metropolitan Statistical Area | PWID Population | Year  | Number | Min    | Max    | Rank   | Rate   | Min    | Max    | Rank |
|-------------------------------|-----------------|-------|--------|--------|--------|--------|--------|--------|--------|------|
| Sacramento, CA                | Male            | 1992  | 11,571 | 8,925  | 15,841 | 27     | 246.67 | 190.27 | 337.71 | 18   |
|                               |                 | 1993  | 11,921 | 9,094  | 15,491 | 25     | 253.13 | 193.10 | 328.93 | 15   |
|                               |                 | 1994  | 9,872  | 9,120  | 11,264 | 29     | 209.45 | 193.49 | 238.99 | 26   |
|                               |                 | 1995  | 10,447 | 8,749  | 13,836 | 27     | 219.46 | 183.80 | 290.65 | 20   |
|                               |                 | 1996  | 9,989  | 8,376  | 13,073 | 27     | 207.03 | 173.59 | 270.93 | 23   |
|                               |                 | 1997  | 9,813  | 8,062  | 12,390 | 27     | 199.11 | 163.59 | 251.41 | 25   |
|                               |                 | 1998  | 9,866  | 7,757  | 11,739 | 26     | 195.34 | 153.58 | 232.42 | 24   |
|                               |                 | 1999  | 9,472  | 7,463  | 10,808 | 31     | 182.74 | 143.99 | 208.51 | 28   |
|                               |                 | 2000  | 9,706  | 7,008  | 11,279 | 26     | 182.10 | 131.48 | 211.61 | 24   |
|                               |                 | 2001  | 9,268  | 6,616  | 11,921 | 29     | 167.32 | 119.44 | 215.23 | 34   |
|                               |                 | 2002  | 9,137  | 6,172  | 12,623 | 27     | 158.96 | 107.37 | 219.61 | 31   |
|                               |                 | 2003  | 9,093  | 5,671  | 13,323 | 26     | 153.72 | 95.86  | 225.23 | 35   |
|                               |                 | 2004  | 9,130  | 5,123  | 14,057 | 26     | 150.54 | 84.48  | 231.79 | 34   |
|                               |                 | 2005  | 9,019  | 4,529  | 14,805 | 28     | 145.90 | 73.27  | 239.52 | 35   |
|                               | 2006            | 8,596 | 3,915  | 15,609 | 31     | 137.23 | 62.50  | 249.17 | 35     |      |
|                               | 2007            | 8,143 | 3,276  | 16,529 | 34     | 128.19 | 51.58  | 260.21 | 39     |      |
|                               | Female          | 1992  | 7,124  | 5,495  | 9,754  | 21     | 149.47 | 115.29 | 204.63 | 11   |
|                               |                 | 1993  | 7,560  | 5,767  | 9,824  | 20     | 158.11 | 120.61 | 205.45 | 8    |
|                               |                 | 1994  | 6,467  | 5,974  | 7,379  | 24     | 134.83 | 124.55 | 153.84 | 15   |
|                               |                 | 1995  | 7,080  | 5,930  | 9,377  | 20     | 145.99 | 122.27 | 193.35 | 12   |
|                               |                 | 1996  | 7,004  | 5,873  | 9,166  | 20     | 142.37 | 119.38 | 186.32 | 12   |
|                               |                 | 1997  | 7,108  | 5,840  | 8,975  | 20     | 141.36 | 116.15 | 178.50 | 9    |
|                               |                 | 1998  | 7,363  | 5,789  | 8,761  | 19     | 142.82 | 112.29 | 169.93 | 9    |
|                               |                 | 1999  | 7,252  | 5,714  | 8,275  | 18     | 136.96 | 107.91 | 156.27 | 9    |
|                               |                 | 2000  | 7,582  | 5,474  | 8,810  | 18     | 139.40 | 100.65 | 161.99 | 9    |
|                               |                 | 2001  | 7,334  | 5,235  | 9,434  | 20     | 130.03 | 92.82  | 167.26 | 11   |
| 2002                          |                 | 7,264 | 4,907  | 10,036 | 19     | 124.37 | 84.00  | 171.82 | 11     |      |
| 2003                          |                 | 7,193 | 4,485  | 10,538 | 19     | 119.61 | 74.59  | 175.25 | 11     |      |
| 2004                          |                 | 7,104 | 3,986  | 10,937 | 20     | 115.43 | 64.77  | 177.72 | 15     |      |
| 2005                          |                 | 6,815 | 3,422  | 11,188 | 21     | 109.02 | 54.75  | 178.96 | 18     |      |
| 2006                          | 6,220           | 2,833 | 11,294 | 23     | 98.21  | 44.73  | 178.32 | 21     |        |      |
| 2007                          | 5,552           | 2,234 | 11,270 | 24     | 86.68  | 34.88  | 175.96 | 26     |        |      |

| Metropolitan Statistical Area | PWID Population | Year  | Number      | Min    | Max    | Rank   | Rate   | Min    | Max    | Rank   |        |    |
|-------------------------------|-----------------|-------|-------------|--------|--------|--------|--------|--------|--------|--------|--------|----|
| Sacramento, CA                | Young (15-29)   | 1992  | 4,234       | 3,266  | 5,797  | 27     | 137.86 | 106.34 | 188.74 | 23     |        |    |
|                               |                 | 1993  | 4,434       | 3,383  | 5,762  | 25     | 147.42 | 112.45 | 191.56 | 16     |        |    |
|                               |                 | 1994  | 3,693       | 3,411  | 4,213  | 29     | 125.26 | 115.71 | 142.92 | 25     |        |    |
|                               |                 | 1995  | 3,895       | 3,262  | 5,158  | 25     | 132.37 | 110.86 | 175.31 | 21     |        |    |
|                               |                 | 1996  | 3,686       | 3,091  | 4,824  | 28     | 124.50 | 104.39 | 162.93 | 26     |        |    |
|                               |                 | 1997  | 3,565       | 2,929  | 4,502  | 29     | 118.24 | 97.14  | 149.29 | 32     |        |    |
|                               |                 | 1998  | 3,518       | 2,766  | 4,186  | 32     | 113.88 | 89.54  | 135.51 | 34     |        |    |
|                               |                 | 1999  | 3,310       | 2,608  | 3,777  | 32     | 104.41 | 82.27  | 119.14 | 37     |        |    |
|                               |                 | 2000  | 3,327       | 2,402  | 3,866  | 36     | 102.01 | 73.65  | 118.54 | 45     |        |    |
|                               |                 | 2001  | 3,124       | 2,230  | 4,018  | 40     | 91.11  | 65.04  | 117.20 | 51     |        |    |
|                               |                 | 2002  | 3,044       | 2,056  | 4,206  | 41     | 84.29  | 56.93  | 116.45 | 60     |        |    |
|                               |                 | 2003  | 3,017       | 1,881  | 4,420  | 43     | 80.13  | 49.97  | 117.41 | 63     |        |    |
|                               |                 | 2004  | 3,044       | 1,708  | 4,687  | 43     | 77.86  | 43.69  | 119.88 | 66     |        |    |
|                               |                 | 2005  | 3,058       | 1,535  | 5,020  | 44     | 76.02  | 38.17  | 124.80 | 72     |        |    |
|                               |                 | 2006  | 3,004       | 1,368  | 5,455  | 45     | 73.08  | 33.28  | 132.70 | 72     |        |    |
|                               |                 | 2007  | 2,978       | 1,198  | 6,045  | 51     | 71.17  | 28.64  | 144.47 | 75     |        |    |
|                               |                 |       | Old (30-64) | 1992   | 14,858 | 11,461 | 20,342 | 23     | 232.67 | 179.48 | 318.55 | 16 |
|                               |                 |       |             | 1993   | 15,350 | 11,709 | 19,946 | 18     | 236.77 | 180.62 | 307.66 | 7  |
|                               |                 |       |             | 1994   | 12,840 | 11,861 | 14,651 | 24     | 195.68 | 180.76 | 223.27 | 18 |
|                               |                 |       |             | 1995   | 13,804 | 11,561 | 18,282 | 22     | 207.03 | 173.39 | 274.19 | 12 |
| 1996                          | 13,460          |       |             | 11,286 | 17,615 | 23     | 198.41 | 166.36 | 259.65 | 14     |        |    |
| 1997                          | 13,506          |       |             | 11,096 | 17,054 | 22     | 194.58 | 159.86 | 245.69 | 12     |        |    |
| 1998                          | 13,867          |       |             | 10,903 | 16,500 | 20     | 194.83 | 153.18 | 231.82 | 9      |        |    |
| 1999                          | 13,566          |       |             | 10,689 | 15,479 | 18     | 185.62 | 146.26 | 211.80 | 11     |        |    |
| 2000                          | 14,113          |       |             | 10,190 | 16,400 | 20     | 187.98 | 135.73 | 218.44 | 9      |        |    |
| 2001                          | 13,611          |       |             | 9,716  | 17,508 | 20     | 175.60 | 125.35 | 225.88 | 11     |        |    |
| 2002                          | 13,465          |       |             | 9,095  | 18,602 | 19     | 168.78 | 114.00 | 233.18 | 12     |        |    |
| 2003                          | 13,340          |       |             | 8,319  | 19,545 | 19     | 163.39 | 101.89 | 239.40 | 11     |        |    |
| 2004                          | 13,205          |       |             | 7,410  | 20,332 | 19     | 158.93 | 89.18  | 244.69 | 11     |        |    |
| 2005                          | 12,711          |       |             | 6,383  | 20,866 | 20     | 151.12 | 75.89  | 248.09 | 12     |        |    |
| 2006                          | 11,631          |       |             | 5,297  | 21,119 | 21     | 137.05 | 62.42  | 248.84 | 13     |        |    |
| 2007                          | 10,372          | 4,174 | 21,055      | 25     | 120.98 | 48.68  | 245.58 | 20     |        |        |        |    |

| Metropolitan Statistical Area | PWID Population | Year  | Number             | Min   | Max    | Rank  | Rate   | Min   | Max    | Rank  |       |    |
|-------------------------------|-----------------|-------|--------------------|-------|--------|-------|--------|-------|--------|-------|-------|----|
| St. Louis, MO--IL             | Total           | 1992  | 15,653             | 6,526 | 22,263 | 32    | 95.37  | 39.77 | 135.64 | 57    |       |    |
|                               |                 | 1993  | 12,304             | 5,008 | 20,778 | 34    | 74.56  | 30.35 | 125.91 | 72    |       |    |
|                               |                 | 1994  | 13,823             | 5,733 | 19,276 | 34    | 83.32  | 34.56 | 116.18 | 68    |       |    |
|                               |                 | 1995  | 10,961             | 5,078 | 17,765 | 38    | 65.68  | 30.43 | 106.45 | 80    |       |    |
|                               |                 | 1996  | 10,317             | 5,006 | 16,321 | 41    | 61.50  | 29.84 | 97.29  | 80    |       |    |
|                               |                 | 1997  | 9,684              | 4,661 | 14,882 | 41    | 57.35  | 27.61 | 88.14  | 83    |       |    |
|                               |                 | 1998  | 9,276              | 4,515 | 14,167 | 42    | 54.74  | 26.65 | 83.60  | 83    |       |    |
|                               |                 | 1999  | 10,205             | 4,381 | 13,486 | 42    | 59.83  | 25.69 | 79.07  | 81    |       |    |
|                               |                 | 2000  | 8,860              | 4,702 | 13,578 | 45    | 51.53  | 27.34 | 78.97  | 89    |       |    |
|                               |                 | 2001  | 10,120             | 5,043 | 13,714 | 43    | 58.20  | 29.00 | 78.87  | 84    |       |    |
|                               |                 | 2002  | 9,159              | 4,861 | 15,236 | 44    | 52.14  | 27.68 | 86.74  | 88    |       |    |
|                               |                 | 2003  | 9,486              | 4,767 | 16,753 | 43    | 53.58  | 26.93 | 94.62  | 86    |       |    |
|                               |                 | 2004  | 9,918              | 4,648 | 18,676 | 43    | 55.45  | 25.98 | 104.40 | 85    |       |    |
|                               |                 | 2005  | 10,363             | 4,523 | 20,632 | 41    | 57.36  | 25.03 | 114.19 | 81    |       |    |
|                               |                 | 2006  | 10,845             | 4,398 | 22,682 | 39    | 59.40  | 24.09 | 124.23 | 78    |       |    |
|                               |                 | 2007  | 11,307             | 4,269 | 24,703 | 36    | 61.46  | 23.21 | 134.27 | 75    |       |    |
|                               |                 |       | Non-Hispanic White | 1992  | 8,844  | 3,687 | 12,578 | 26    | 66.65  | 27.79 | 94.79 | 58 |
|                               |                 |       |                    | 1993  | 6,492  | 2,643 | 10,963 | 31    | 48.84  | 19.88 | 82.47 | 68 |
|                               |                 |       |                    | 1994  | 6,934  | 2,876 | 9,668  | 31    | 52.07  | 21.60 | 72.61 | 71 |
|                               |                 |       |                    | 1995  | 5,320  | 2,465 | 8,622  | 37    | 39.84  | 18.46 | 64.57 | 82 |
| 1996                          | 4,925           |       |                    | 2,390 | 7,791  | 41    | 36.82  | 17.86 | 58.24  | 82    |       |    |
| 1997                          | 4,610           |       |                    | 2,219 | 7,086  | 44    | 34.36  | 16.54 | 52.81  | 87    |       |    |
| 1998                          | 4,453           |       |                    | 2,168 | 6,801  | 44    | 33.17  | 16.15 | 50.66  | 87    |       |    |
| 1999                          | 4,978           |       |                    | 2,137 | 6,578  | 41    | 36.97  | 15.87 | 48.86  | 89    |       |    |
| 2000                          | 4,412           |       |                    | 2,341 | 6,761  | 44    | 32.62  | 17.31 | 49.98  | 92    |       |    |
| 2001                          | 5,152           |       |                    | 2,567 | 6,981  | 39    | 37.76  | 18.81 | 51.16  | 89    |       |    |
| 2002                          | 4,761           |       |                    | 2,527 | 7,920  | 42    | 34.63  | 18.38 | 57.61  | 92    |       |    |
| 2003                          | 5,017           |       |                    | 2,521 | 8,860  | 40    | 36.30  | 18.24 | 64.11  | 93    |       |    |
| 2004                          | 5,305           |       |                    | 2,486 | 9,990  | 40    | 38.12  | 17.86 | 71.78  | 91    |       |    |
| 2005                          | 5,561           |       |                    | 2,427 | 11,071 | 39    | 39.69  | 17.32 | 79.02  | 88    |       |    |
| 2006                          | 5,779           |       |                    | 2,343 | 12,086 | 38    | 40.95  | 16.60 | 85.64  | 85    |       |    |
| 2007                          | 5,908           | 2,231 | 12,908             | 37    | 41.67  | 15.74 | 91.05  | 87    |        |       |       |    |

| Metropolitan Statistical Area | PWID Population    | Year | Number   | Min   | Max   | Rank  | Rate   | Min   | Max    | Rank  |       |    |
|-------------------------------|--------------------|------|----------|-------|-------|-------|--------|-------|--------|-------|-------|----|
| St. Louis, MO--IL             | Non-Hispanic Black | 1992 | 6,260    | 2,610 | 8,903 | 16    | 229.81 | 95.82 | 326.86 | 67    |       |    |
|                               |                    | 1993 | 5,303    | 2,159 | 8,955 | 18    | 191.68 | 78.02 | 323.70 | 72    |       |    |
|                               |                    | 1994 | 6,246    | 2,591 | 8,709 | 16    | 222.15 | 92.14 | 309.77 | 64    |       |    |
|                               |                    | 1995 | 5,080    | 2,354 | 8,234 | 17    | 178.23 | 82.58 | 288.88 | 67    |       |    |
|                               |                    | 1996 | 4,821    | 2,339 | 7,627 | 18    | 167.00 | 81.04 | 264.19 | 69    |       |    |
|                               |                    | 1997 | 4,499    | 2,166 | 6,914 | 19    | 153.38 | 73.83 | 235.72 | 74    |       |    |
|                               |                    | 1998 | 4,237    | 2,062 | 6,471 | 20    | 143.04 | 69.62 | 218.45 | 73    |       |    |
|                               |                    | 1999 | 4,543    | 1,950 | 6,003 | 21    | 151.27 | 64.94 | 199.90 | 71    |       |    |
|                               |                    | 2000 | 3,821    | 2,028 | 5,856 | 20    | 125.56 | 66.63 | 192.42 | 74    |       |    |
|                               |                    | 2001 | 4,217    | 2,101 | 5,714 | 20    | 136.65 | 68.09 | 185.17 | 68    |       |    |
|                               |                    | 2002 | 3,689    | 1,958 | 6,136 | 19    | 117.88 | 62.57 | 196.09 | 68    |       |    |
|                               |                    | 2003 | 3,708    | 1,863 | 6,548 | 18    | 116.95 | 58.78 | 206.54 | 67    |       |    |
|                               |                    | 2004 | 3,793    | 1,777 | 7,142 | 19    | 117.63 | 55.12 | 221.49 | 67    |       |    |
|                               |                    | 2005 | 3,925    | 1,713 | 7,814 | 20    | 119.65 | 52.22 | 238.20 | 64    |       |    |
|                               |                    | 2006 | 4,132    | 1,676 | 8,643 | 18    | 123.77 | 50.19 | 258.88 | 60    |       |    |
|                               |                    | 2007 | 4,416    | 1,668 | 9,649 | 18    | 130.41 | 49.24 | 284.93 | 58    |       |    |
|                               |                    |      | Hispanic | 1992  | 80    | 34    | 114    | 78    | 44.06  | 18.37 | 62.67 | 88 |
|                               |                    |      |          | 1993  | 70    | 28    | 118    | 82    | 36.51  | 14.86 | 61.66 | 89 |
|                               |                    |      |          | 1994  | 84    | 35    | 117    | 80    | 42.31  | 17.55 | 58.99 | 87 |
|                               |                    |      |          | 1995  | 70    | 33    | 114    | 82    | 34.05  | 15.77 | 55.18 | 89 |
| 1996                          | 69                 |      |          | 34    | 109   | 83    | 31.85  | 15.45 | 50.39  | 88    |       |    |
| 1997                          | 67                 |      |          | 32    | 103   | 83    | 29.29  | 14.10 | 45.02  | 88    |       |    |
| 1998                          | 66                 |      |          | 32    | 100   | 84    | 27.52  | 13.39 | 42.02  | 87    |       |    |
| 1999                          | 74                 |      |          | 32    | 98    | 84    | 29.54  | 12.68 | 39.04  | 86    |       |    |
| 2000                          | 66                 |      |          | 35    | 101   | 86    | 25.04  | 13.29 | 38.38  | 88    |       |    |
| 2001                          | 78                 |      |          | 39    | 106   | 85    | 27.92  | 13.91 | 37.83  | 85    |       |    |
| 2002                          | 75                 |      |          | 40    | 125   | 86    | 25.13  | 13.34 | 41.80  | 87    |       |    |
| 2003                          | 83                 |      |          | 42    | 147   | 85    | 26.77  | 13.45 | 47.27  | 85    |       |    |
| 2004                          | 96                 |      |          | 45    | 181   | 82    | 29.17  | 13.67 | 54.92  | 80    |       |    |
| 2005                          | 114                |      |          | 50    | 227   | 82    | 32.98  | 14.40 | 65.67  | 77    |       |    |
| 2006                          | 141                | 57   | 294      | 79    | 38.65 | 15.68 | 80.85  | 72    |        |       |       |    |
| 2007                          | 180                | 68   | 394      | 75    | 47.50 | 17.94 | 103.77 | 66    |        |       |       |    |

| Metropolitan Statistical Area | PWID Population | Year   | Number | Min    | Max    | Rank  | Rate   | Min    | Max    | Rank  |    |
|-------------------------------|-----------------|--------|--------|--------|--------|-------|--------|--------|--------|-------|----|
| St. Louis, MO--IL             | Male            | 1992   | 10,012 | 4,175  | 14,240 | 34    | 125.36 | 52.27  | 178.30 | 57    |    |
|                               |                 | 1993   | 7,965  | 3,242  | 13,451 | 36    | 99.15  | 40.36  | 167.44 | 72    |    |
|                               |                 | 1994   | 8,992  | 3,730  | 12,539 | 35    | 111.32 | 46.17  | 155.22 | 65    |    |
|                               |                 | 1995   | 7,122  | 3,300  | 11,543 | 38    | 87.63  | 40.60  | 142.02 | 77    |    |
|                               |                 | 1996   | 6,662  | 3,233  | 10,539 | 41    | 81.50  | 39.54  | 128.92 | 80    |    |
|                               |                 | 1997   | 6,188  | 2,979  | 9,510  | 41    | 75.23  | 36.21  | 115.61 | 84    |    |
|                               |                 | 1998   | 5,845  | 2,845  | 8,928  | 43    | 70.84  | 34.48  | 108.19 | 85    |    |
|                               |                 | 1999   | 6,325  | 2,715  | 8,358  | 42    | 76.13  | 32.68  | 100.61 | 82    |    |
|                               |                 | 2000   | 5,391  | 2,861  | 8,262  | 46    | 64.34  | 34.15  | 98.61  | 89    |    |
|                               |                 | 2001   | 6,041  | 3,010  | 8,186  | 43    | 71.26  | 35.51  | 96.57  | 84    |    |
|                               |                 | 2002   | 5,365  | 2,848  | 8,925  | 46    | 62.62  | 33.24  | 104.18 | 92    |    |
|                               |                 | 2003   | 5,462  | 2,745  | 9,645  | 46    | 63.21  | 31.77  | 111.63 | 93    |    |
|                               |                 | 2004   | 5,629  | 2,638  | 10,599 | 46    | 64.38  | 30.17  | 121.23 | 92    |    |
|                               |                 | 2005   | 5,821  | 2,541  | 11,590 | 45    | 65.90  | 28.76  | 131.20 | 91    |    |
|                               | 2006            | 6,064  | 2,459  | 12,684 | 42     | 67.91 | 27.54  | 142.04 | 85     |       |    |
|                               | 2007            | 6,338  | 2,393  | 13,848 | 41     | 70.41 | 26.59  | 153.83 | 81     |       |    |
|                               |                 | Female | 1992   | 5,793  | 2,415  | 8,239 | 27     | 68.75  | 28.67  | 97.78 | 54 |
|                               |                 |        | 1993   | 4,478  | 1,823  | 7,562 | 33     | 52.88  | 21.52  | 89.30 | 69 |
|                               |                 |        | 1994   | 5,007  | 2,077  | 6,981 | 33     | 58.81  | 24.39  | 82.01 | 65 |
|                               |                 |        | 1995   | 3,991  | 1,849  | 6,468 | 35     | 46.62  | 21.60  | 75.55 | 79 |
|                               |                 |        | 1996   | 3,808  | 1,848  | 6,024 | 38     | 44.27  | 21.48  | 70.04 | 81 |
|                               |                 |        | 1997   | 3,645  | 1,755  | 5,602 | 37     | 42.10  | 20.26  | 64.70 | 83 |
|                               |                 |        | 1998   | 3,576  | 1,741  | 5,462 | 39     | 41.14  | 20.03  | 62.83 | 85 |
|                               |                 |        | 1999   | 4,039  | 1,734  | 5,337 | 37     | 46.17  | 19.82  | 61.01 | 84 |
|                               |                 |        | 2000   | 3,601  | 1,911  | 5,518 | 41     | 40.85  | 21.68  | 62.60 | 86 |
|                               |                 |        | 2001   | 4,218  | 2,102  | 5,716 | 39     | 47.34  | 23.59  | 64.14 | 83 |
|                               | 2002            |        | 3,903  | 2,072  | 6,493  | 41    | 43.38  | 23.03  | 72.17  | 81    |    |
|                               | 2003            |        | 4,115  | 2,068  | 7,268  | 37    | 45.40  | 22.82  | 80.18  | 79    |    |
|                               | 2004            | 4,354  | 2,040  | 8,199  | 35     | 47.61 | 22.31  | 89.65  | 76     |       |    |
|                               | 2005            | 4,570  | 1,995  | 9,098  | 35     | 49.49 | 21.60  | 98.52  | 72     |       |    |
|                               | 2006            | 4,761  | 1,931  | 9,958  | 32     | 51.04 | 20.70  | 106.75 | 68     |       |    |
|                               | 2007            | 4,890  | 1,846  | 10,684 | 31     | 52.04 | 19.65  | 113.71 | 67     |       |    |

| Metropolitan Statistical Area | PWID Population | Year  | Number      | Min   | Max    | Rank  | Rate   | Min   | Max    | Rank  |        |    |
|-------------------------------|-----------------|-------|-------------|-------|--------|-------|--------|-------|--------|-------|--------|----|
| St. Louis, MO--IL             | Young (15-29)   | 1992  | 4,074       | 1,699 | 5,795  | 32    | 76.86  | 32.05 | 109.32 | 59    |        |    |
|                               |                 | 1993  | 3,002       | 1,222 | 5,069  | 37    | 57.41  | 23.37 | 96.96  | 65    |        |    |
|                               |                 | 1994  | 3,276       | 1,359 | 4,568  | 35    | 63.35  | 26.28 | 88.34  | 64    |        |    |
|                               |                 | 1995  | 2,604       | 1,206 | 4,220  | 41    | 50.54  | 23.42 | 81.92  | 72    |        |    |
|                               |                 | 1996  | 2,523       | 1,224 | 3,991  | 40    | 48.95  | 23.75 | 77.44  | 71    |        |    |
|                               |                 | 1997  | 2,487       | 1,197 | 3,823  | 42    | 48.16  | 23.18 | 74.02  | 76    |        |    |
|                               |                 | 1998  | 2,539       | 1,236 | 3,878  | 40    | 49.13  | 23.92 | 75.04  | 77    |        |    |
|                               |                 | 1999  | 3,003       | 1,289 | 3,969  | 36    | 58.09  | 24.94 | 76.77  | 74    |        |    |
|                               |                 | 2000  | 2,811       | 1,492 | 4,308  | 40    | 54.38  | 28.86 | 83.34  | 77    |        |    |
|                               |                 | 2001  | 3,454       | 1,721 | 4,681  | 34    | 66.60  | 33.19 | 90.25  | 72    |        |    |
|                               |                 | 2002  | 3,340       | 1,773 | 5,557  | 37    | 63.98  | 33.96 | 106.44 | 75    |        |    |
|                               |                 | 2003  | 3,657       | 1,838 | 6,459  | 34    | 69.44  | 34.90 | 122.63 | 72    |        |    |
|                               |                 | 2004  | 3,985       | 1,868 | 7,504  | 33    | 74.33  | 34.83 | 139.96 | 72    |        |    |
|                               |                 | 2005  | 4,265       | 1,862 | 8,492  | 33    | 78.47  | 34.25 | 156.22 | 68    |        |    |
|                               |                 | 2006  | 4,479       | 1,816 | 9,368  | 29    | 81.20  | 32.93 | 169.84 | 65    |        |    |
|                               |                 | 2007  | 4,574       | 1,727 | 9,993  | 28    | 82.12  | 31.01 | 179.43 | 59    |        |    |
|                               |                 |       | Old (30-64) | 1992  | 11,786 | 4,914 | 16,763 | 32    | 106.06 | 44.22 | 150.85 | 57 |
|                               |                 |       |             | 1993  | 9,434  | 3,840 | 15,933 | 33    | 83.69  | 34.06 | 141.33 | 71 |
|                               |                 |       |             | 1994  | 10,689 | 4,433 | 14,904 | 34    | 93.59  | 38.82 | 130.51 | 66 |
|                               |                 |       |             | 1995  | 8,479  | 3,928 | 13,742 | 37    | 73.49  | 34.05 | 119.11 | 78 |
| 1996                          | 7,929           |       |             | 3,848 | 12,544 | 39    | 68.23  | 33.11 | 107.93 | 79    |        |    |
| 1997                          | 7,348           |       |             | 3,537 | 11,293 | 41    | 62.69  | 30.18 | 96.35  | 84    |        |    |
| 1998                          | 6,907           |       |             | 3,362 | 10,549 | 41    | 58.65  | 28.55 | 89.58  | 87    |        |    |
| 1999                          | 7,413           |       |             | 3,183 | 9,797  | 41    | 62.37  | 26.78 | 82.42  | 85    |        |    |
| 2000                          | 6,245           |       |             | 3,314 | 9,571  | 42    | 51.94  | 27.56 | 79.60  | 92    |        |    |
| 2001                          | 6,890           |       |             | 3,434 | 9,337  | 41    | 56.47  | 28.14 | 76.52  | 86    |        |    |
| 2002                          | 6,002           |       |             | 3,186 | 9,985  | 43    | 48.62  | 25.81 | 80.89  | 93    |        |    |
| 2003                          | 5,973           |       |             | 3,002 | 10,548 | 45    | 48.02  | 24.13 | 84.80  | 91    |        |    |
| 2004                          | 6,002           |       |             | 2,813 | 11,302 | 45    | 47.92  | 22.45 | 90.22  | 88    |        |    |
| 2005                          | 6,044           |       |             | 2,638 | 12,033 | 44    | 47.85  | 20.88 | 95.26  | 87    |        |    |
| 2006                          | 6,130           | 2,486 | 12,822      | 40    | 48.11  | 19.51 | 100.63 | 87    |        |       |        |    |
| 2007                          | 6,248           | 2,359 | 13,650      | 38    | 48.70  | 18.39 | 106.41 | 80    |        |       |        |    |



| Metropolitan Statistical Area | PWID Population | Year  | Number             | Min   | Max    | Rank  | Rate   | Min   | Max    | Rank  |        |    |
|-------------------------------|-----------------|-------|--------------------|-------|--------|-------|--------|-------|--------|-------|--------|----|
| Salt Lake City--Ogden, UT     | Total           | 1992  | 5,234              | 2,478 | 7,911  | 75    | 73.27  | 34.69 | 110.73 | 78    |        |    |
|                               |                 | 1993  | 8,371              | 3,030 | 16,051 | 46    | 112.58 | 40.75 | 215.89 | 43    |        |    |
|                               |                 | 1994  | 6,403              | 3,587 | 8,744  | 65    | 82.91  | 46.45 | 113.22 | 70    |        |    |
|                               |                 | 1995  | 9,337              | 4,135 | 16,357 | 44    | 117.11 | 51.86 | 205.16 | 40    |        |    |
|                               |                 | 1996  | 9,708              | 4,408 | 16,296 | 43    | 118.31 | 53.72 | 198.60 | 39    |        |    |
|                               |                 | 1997  | 10,067             | 4,632 | 16,179 | 39    | 119.63 | 55.04 | 192.26 | 40    |        |    |
|                               |                 | 1998  | 10,362             | 4,847 | 15,905 | 39    | 121.13 | 56.66 | 185.93 | 40    |        |    |
|                               |                 | 1999  | 9,039              | 5,121 | 11,832 | 47    | 104.21 | 59.04 | 136.41 | 48    |        |    |
|                               |                 | 2000  | 10,924             | 5,664 | 14,795 | 39    | 124.02 | 64.30 | 167.95 | 35    |        |    |
|                               |                 | 2001  | 10,382             | 6,486 | 14,501 | 41    | 115.83 | 72.36 | 161.78 | 42    |        |    |
|                               |                 | 2002  | 11,834             | 7,359 | 16,049 | 34    | 129.91 | 80.78 | 176.18 | 28    |        |    |
|                               |                 | 2003  | 12,290             | 8,025 | 17,764 | 33    | 132.74 | 86.68 | 191.86 | 26    |        |    |
|                               |                 | 2004  | 12,695             | 8,338 | 19,668 | 32    | 134.86 | 88.58 | 208.94 | 22    |        |    |
|                               |                 | 2005  | 13,044             | 8,141 | 21,760 | 32    | 136.40 | 85.13 | 227.53 | 21    |        |    |
|                               |                 | 2006  | 13,520             | 7,937 | 24,252 | 31    | 137.96 | 80.99 | 247.47 | 21    |        |    |
|                               |                 | 2007  | 13,949             | 7,573 | 26,717 | 28    | 139.69 | 75.84 | 267.56 | 19    |        |    |
|                               |                 |       | Non-Hispanic White | 1992  | 3,992  | 1,890 | 6,033  | 58    | 62.67  | 29.67 | 94.71  | 59 |
|                               |                 |       |                    | 1993  | 6,304  | 2,282 | 12,089 | 33    | 95.58  | 34.60 | 183.29 | 36 |
|                               |                 |       |                    | 1994  | 4,779  | 2,677 | 6,526  | 48    | 70.23  | 39.35 | 95.91  | 53 |
|                               |                 |       |                    | 1995  | 6,925  | 3,067 | 12,132 | 28    | 99.20  | 43.93 | 173.78 | 33 |
| 1996                          | 7,169           |       |                    | 3,255 | 12,034 | 26    | 100.61 | 45.68 | 168.88 | 33    |        |    |
| 1997                          | 7,409           |       |                    | 3,409 | 11,907 | 25    | 102.37 | 47.10 | 164.53 | 32    |        |    |
| 1998                          | 7,600           |       |                    | 3,555 | 11,665 | 25    | 104.27 | 48.77 | 160.05 | 28    |        |    |
| 1999                          | 6,600           |       |                    | 3,740 | 8,640  | 31    | 90.04  | 51.01 | 117.86 | 39    |        |    |
| 2000                          | 7,926           |       |                    | 4,109 | 10,734 | 25    | 107.22 | 55.59 | 145.20 | 27    |        |    |
| 2001                          | 7,460           |       |                    | 4,661 | 10,419 | 24    | 99.76  | 62.33 | 139.34 | 34    |        |    |
| 2002                          | 8,385           |       |                    | 5,214 | 11,371 | 24    | 110.87 | 68.94 | 150.35 | 24    |        |    |
| 2003                          | 8,537           |       |                    | 5,574 | 12,339 | 23    | 111.52 | 72.82 | 161.19 | 26    |        |    |
| 2004                          | 8,580           |       |                    | 5,635 | 13,292 | 23    | 110.72 | 72.72 | 171.53 | 26    |        |    |
| 2005                          | 8,494           |       |                    | 5,301 | 14,169 | 25    | 108.43 | 67.68 | 180.88 | 26    |        |    |
| 2006                          | 8,377           | 4,918 | 15,027             | 25    | 104.96 | 61.62 | 188.28 | 27    |        |       |        |    |
| 2007                          | 8,096           | 4,396 | 15,507             | 25    | 100.28 | 54.45 | 192.07 | 35    |        |       |        |    |

| Metropolitan Statistical Area | PWID Population    | Year     | Number | Min   | Max    | Rank    | Rate    | Min     | Max     | Rank   |    |
|-------------------------------|--------------------|----------|--------|-------|--------|---------|---------|---------|---------|--------|----|
| Salt Lake City--Ogden, UT     | Non-Hispanic Black | 1992     | 427    | 202   | 645    | 93      | 596.07  | 282.22  | 900.85  | 9      |    |
|                               |                    | 1993     | 594    | 215   | 1,139  | 88      | 795.46  | 287.94  | 1525.35 | 4      |    |
|                               |                    | 1994     | 401    | 225   | 548    | 94      | 504.67  | 282.73  | 689.15  | 11     |    |
|                               |                    | 1995     | 525    | 232   | 920    | 88      | 630.52  | 279.21  | 1104.57 | 5      |    |
|                               |                    | 1996     | 500    | 227   | 839    | 88      | 579.87  | 263.28  | 973.36  | 5      |    |
|                               |                    | 1997     | 486    | 224   | 781    | 88      | 536.92  | 247.05  | 862.91  | 6      |    |
|                               |                    | 1998     | 481    | 225   | 738    | 88      | 513.86  | 240.34  | 788.74  | 6      |    |
|                               |                    | 1999     | 415    | 235   | 543    | 91      | 424.44  | 240.49  | 555.62  | 7      |    |
|                               |                    | 2000     | 512    | 265   | 693    | 85      | 493.93  | 256.08  | 668.92  | 5      |    |
|                               |                    | 2001     | 514    | 321   | 717    | 84      | 476.41  | 297.63  | 665.39  | 5      |    |
|                               |                    | 2002     | 640    | 398   | 868    | 75      | 576.68  | 358.60  | 782.07  | 4      |    |
|                               |                    | 2003     | 755    | 493   | 1,091  | 72      | 661.57  | 431.99  | 956.21  | 3      |    |
|                               |                    | 2004     | 920    | 604   | 1,426  | 66      | 780.79  | 512.81  | 1209.61 | 2      |    |
|                               |                    | 2005     | 1,161  | 724   | 1,936  | 64      | 948.65  | 592.08  | 1582.50 | 2      |    |
|                               |                    | 2006     | 1,535  | 901   | 2,753  | 51      | 1190.96 | 699.17  | 2136.28 | 2      |    |
|                               | 2007               | 2,090    | 1,135  | 4,003 | 33     | 1551.63 | 842.44  | 2971.97 | 1       |        |    |
|                               |                    | Hispanic | 1992   | 550   | 260    | 831     | 51      | 120.53  | 57.07   | 182.17 | 54 |
|                               |                    |          | 1993   | 837   | 303    | 1,606   | 43      | 166.51  | 60.27   | 319.30 | 38 |
|                               |                    |          | 1994   | 615   | 345    | 840     | 47      | 110.75  | 62.04   | 151.23 | 53 |
|                               |                    |          | 1995   | 868   | 385    | 1,521   | 42      | 142.58  | 63.14   | 249.78 | 39 |
| 1996                          |                    |          | 881    | 400   | 1,479  | 43      | 129.85  | 58.96   | 217.96  | 38     |    |
| 1997                          |                    |          | 898    | 413   | 1,443  | 43      | 118.68  | 54.60   | 190.73  | 38     |    |
| 1998                          |                    |          | 915    | 428   | 1,404  | 44      | 110.69  | 51.77   | 169.91  | 39     |    |
| 1999                          |                    |          | 796    | 451   | 1,042  | 46      | 89.80   | 50.88   | 117.55  | 47     |    |
| 2000                          |                    |          | 967    | 501   | 1,309  | 45      | 103.15  | 53.48   | 139.69  | 41     |    |
| 2001                          |                    |          | 930    | 581   | 1,299  | 45      | 93.85   | 58.63   | 131.07  | 42     |    |
| 2002                          |                    |          | 1,082  | 673   | 1,467  | 45      | 104.24  | 64.82   | 141.37  | 40     |    |
| 2003                          |                    |          | 1,155  | 754   | 1,670  | 45      | 106.78  | 69.72   | 154.33  | 36     |    |
| 2004                          |                    |          | 1,238  | 813   | 1,917  | 45      | 109.77  | 72.10   | 170.06  | 35     |    |
| 2005                          |                    |          | 1,331  | 831   | 2,220  | 42      | 112.96  | 70.50   | 188.44  | 34     |    |
| 2006                          |                    |          | 1,458  | 856   | 2,615  | 42      | 117.06  | 68.72   | 209.98  | 29     |    |
| 2007                          | 1,607              | 872      | 3,078  | 40    | 121.73 | 66.09   | 233.16  | 26      |         |        |    |

| Metropolitan Statistical Area | PWID Population | Year   | Number | Min    | Max    | Rank   | Rate   | Min    | Max    | Rank   |    |
|-------------------------------|-----------------|--------|--------|--------|--------|--------|--------|--------|--------|--------|----|
| Salt Lake City--Ogden, UT     | Male            | 1992   | 3,682  | 1,743  | 5,565  | 74     | 102.73 | 48.64  | 155.26 | 75     |    |
|                               |                 | 1993   | 5,844  | 2,115  | 11,206 | 45     | 156.39 | 56.61  | 299.89 | 39     |    |
|                               |                 | 1994   | 4,419  | 2,475  | 6,034  | 63     | 113.63 | 63.66  | 155.17 | 62     |    |
|                               |                 | 1995   | 6,348  | 2,811  | 11,121 | 42     | 157.82 | 69.89  | 276.47 | 41     |    |
|                               |                 | 1996   | 6,486  | 2,945  | 10,888 | 42     | 156.43 | 71.02  | 262.58 | 41     |    |
|                               |                 | 1997   | 6,597  | 3,035  | 10,603 | 39     | 154.84 | 71.24  | 248.85 | 40     |    |
|                               |                 | 1998   | 6,655  | 3,113  | 10,215 | 37     | 153.39 | 71.74  | 235.44 | 42     |    |
|                               |                 | 1999   | 5,689  | 3,224  | 7,448  | 45     | 129.10 | 73.15  | 169.00 | 46     |    |
|                               |                 | 2000   | 6,748  | 3,499  | 9,139  | 36     | 150.54 | 78.05  | 203.88 | 39     |    |
|                               |                 | 2001   | 6,311  | 3,942  | 8,814  | 42     | 138.23 | 86.36  | 193.06 | 42     |    |
|                               |                 | 2002   | 7,107  | 4,419  | 9,637  | 35     | 152.99 | 95.14  | 207.48 | 36     |    |
|                               |                 | 2003   | 7,331  | 4,787  | 10,596 | 35     | 155.06 | 101.25 | 224.12 | 33     |    |
|                               |                 | 2004   | 7,574  | 4,974  | 11,734 | 36     | 157.40 | 103.38 | 243.85 | 29     |    |
|                               |                 | 2005   | 7,845  | 4,896  | 13,087 | 35     | 160.29 | 100.04 | 267.39 | 25     |    |
|                               | 2006            | 8,269  | 4,855  | 14,833 | 32     | 164.60 | 96.63  | 295.24 | 25     |        |    |
|                               | 2007            | 8,757  | 4,754  | 16,772 | 28     | 170.80 | 92.74  | 327.16 | 23     |        |    |
|                               |                 | Female | 1992   | 1,564  | 740    | 2,364  | 77     | 43.94  | 20.80  | 66.40  | 83 |
|                               |                 |        | 1993   | 2,550  | 923    | 4,890  | 57     | 68.95  | 24.96  | 132.22 | 48 |
|                               |                 |        | 1994   | 2,007  | 1,124  | 2,741  | 69     | 52.35  | 29.33  | 71.48  | 74 |
|                               |                 |        | 1995   | 3,031  | 1,342  | 5,310  | 47     | 76.73  | 33.98  | 134.43 | 43 |
|                               |                 |        | 1996   | 3,277  | 1,488  | 5,500  | 42     | 80.73  | 36.65  | 135.51 | 41 |
|                               |                 |        | 1997   | 3,538  | 1,628  | 5,686  | 39     | 85.17  | 39.19  | 136.88 | 38 |
|                               |                 |        | 1998   | 3,789  | 1,772  | 5,816  | 38     | 89.88  | 42.04  | 137.96 | 32 |
|                               |                 |        | 1999   | 3,429  | 1,943  | 4,489  | 43     | 80.36  | 45.53  | 105.20 | 46 |
|                               |                 |        | 2000   | 4,279  | 2,219  | 5,795  | 35     | 98.91  | 51.28  | 133.96 | 20 |
|                               |                 |        | 2001   | 4,172  | 2,606  | 5,827  | 40     | 94.86  | 59.26  | 132.48 | 31 |
|                               | 2002            |        | 4,838  | 3,009  | 6,561  | 31     | 108.37 | 67.39  | 146.97 | 16     |    |
|                               | 2003            |        | 5,063  | 3,306  | 7,317  | 26     | 111.74 | 72.96  | 161.51 | 16     |    |
|                               | 2004            | 5,208  | 3,421  | 8,069  | 26     | 113.19 | 74.34  | 175.35 | 17     |        |    |
|                               | 2005            | 5,257  | 3,281  | 8,769  | 25     | 112.59 | 70.27  | 187.82 | 17     |        |    |
|                               | 2006            | 5,267  | 3,092  | 9,447  | 25     | 110.27 | 64.74  | 197.80 | 17     |        |    |
|                               | 2007            | 5,151  | 2,797  | 9,866  | 26     | 106.02 | 57.56  | 203.06 | 18     |        |    |

| Metropolitan Statistical Area | PWID Population | Year        | Number | Min    | Max    | Rank   | Rate   | Min    | Max    | Rank   |    |
|-------------------------------|-----------------|-------------|--------|--------|--------|--------|--------|--------|--------|--------|----|
| Salt Lake City--Ogden, UT     | Young (15-29)   | 1992        | 1,876  | 888    | 2,835  | 58     | 67.84  | 32.12  | 102.53 | 64     |    |
|                               |                 | 1993        | 2,963  | 1,073  | 5,683  | 39     | 102.75 | 37.19  | 197.03 | 41     |    |
|                               |                 | 1994        | 2,242  | 1,256  | 3,062  | 47     | 74.46  | 41.71  | 101.67 | 57     |    |
|                               |                 | 1995        | 3,238  | 1,434  | 5,673  | 31     | 103.43 | 45.80  | 181.19 | 39     |    |
|                               |                 | 1996        | 3,342  | 1,517  | 5,610  | 31     | 103.00 | 46.76  | 172.89 | 39     |    |
|                               |                 | 1997        | 3,447  | 1,586  | 5,540  | 32     | 102.98 | 47.38  | 165.50 | 39     |    |
|                               |                 | 1998        | 3,540  | 1,656  | 5,434  | 29     | 103.58 | 48.45  | 158.99 | 39     |    |
|                               |                 | 1999        | 3,091  | 1,751  | 4,046  | 35     | 88.93  | 50.39  | 116.41 | 51     |    |
|                               |                 | 2000        | 3,752  | 1,945  | 5,082  | 31     | 106.39 | 55.16  | 144.08 | 39     |    |
|                               |                 | 2001        | 3,597  | 2,247  | 5,024  | 33     | 101.73 | 63.55  | 142.08 | 45     |    |
|                               |                 | 2002        | 4,153  | 2,583  | 5,632  | 29     | 116.82 | 72.64  | 158.43 | 37     |    |
|                               |                 | 2003        | 4,390  | 2,867  | 6,345  | 29     | 122.61 | 80.06  | 177.21 | 29     |    |
|                               |                 | 2004        | 4,639  | 3,047  | 7,186  | 26     | 128.76 | 84.57  | 199.48 | 28     |    |
|                               |                 | 2005        | 4,900  | 3,058  | 8,175  | 25     | 135.47 | 84.55  | 225.99 | 27     |    |
|                               |                 | 2006        | 5,249  | 3,082  | 9,416  | 23     | 143.21 | 84.08  | 256.89 | 24     |    |
|                               | 2007            | 5,625       | 3,054  | 10,775 | 20     | 152.79 | 82.96  | 292.65 | 22     |        |    |
|                               |                 | Old (30-64) | 1992   | 3,482  | 1,649  | 5,262  | 78     | 79.51  | 37.65  | 120.17 | 84 |
|                               |                 |             | 1993   | 5,510  | 1,995  | 10,566 | 56     | 121.08 | 43.83  | 232.18 | 45 |
|                               |                 |             | 1994   | 4,195  | 2,350  | 5,729  | 72     | 89.04  | 49.88  | 121.58 | 73 |
|                               |                 |             | 1995   | 6,117  | 2,709  | 10,715 | 48     | 126.34 | 55.95  | 221.32 | 41 |
|                               |                 |             | 1996   | 6,380  | 2,897  | 10,709 | 46     | 128.60 | 58.39  | 215.87 | 38 |
| 1997                          |                 |             | 6,648  | 3,059  | 10,684 | 44     | 131.20 | 60.37  | 210.85 | 37     |    |
| 1998                          |                 |             | 6,878  | 3,217  | 10,558 | 43     | 133.91 | 62.63  | 205.54 | 34     |    |
| 1999                          |                 |             | 6,024  | 3,413  | 7,886  | 51     | 115.89 | 65.66  | 151.71 | 41     |    |
| 2000                          |                 |             | 7,293  | 3,781  | 9,877  | 40     | 138.08 | 71.59  | 187.00 | 26     |    |
| 2001                          |                 |             | 6,918  | 4,322  | 9,662  | 40     | 127.45 | 79.62  | 178.01 | 34     |    |
| 2002                          |                 |             | 7,832  | 4,870  | 10,621 | 36     | 141.00 | 87.68  | 191.22 | 23     |    |
| 2003                          |                 |             | 8,027  | 5,242  | 11,603 | 35     | 141.38 | 92.31  | 204.34 | 19     |    |
| 2004                          |                 |             | 8,118  | 5,332  | 12,577 | 34     | 139.71 | 91.76  | 216.44 | 16     |    |
| 2005                          |                 |             | 8,081  | 5,043  | 13,480 | 32     | 135.90 | 84.82  | 226.71 | 15     |    |
| 2006                          |                 |             | 8,002  | 4,698  | 14,354 | 31     | 130.44 | 76.58  | 233.98 | 17     |    |
| 2007                          | 7,744           | 4,205       | 14,834 | 31     | 122.86 | 66.70  | 235.32 | 17     |        |        |    |

| Metropolitan Statistical Area | PWID Population | Year | Number             | Min    | Max    | Rank  | Rate   | Min    | Max    | Rank   |        |    |
|-------------------------------|-----------------|------|--------------------|--------|--------|-------|--------|--------|--------|--------|--------|----|
| San Antonio, TX               | Total           | 1992 | 23,204             | 20,878 | 25,229 | 18    | 259.02 | 233.06 | 281.64 | 4      |        |    |
|                               |                 | 1993 | 19,796             | 13,813 | 24,368 | 21    | 216.55 | 151.09 | 266.55 | 9      |        |    |
|                               |                 | 1994 | 20,428             | 17,077 | 23,585 | 20    | 218.10 | 182.32 | 251.80 | 9      |        |    |
|                               |                 | 1995 | 17,664             | 13,459 | 22,745 | 24    | 184.09 | 140.27 | 237.05 | 13     |        |    |
|                               |                 | 1996 | 16,526             | 13,125 | 21,745 | 25    | 169.36 | 134.50 | 222.83 | 16     |        |    |
|                               |                 | 1997 | 15,446             | 11,769 | 20,733 | 28    | 155.41 | 118.41 | 208.61 | 19     |        |    |
|                               |                 | 1998 | 14,558             | 10,799 | 19,762 | 28    | 143.75 | 106.63 | 195.14 | 26     |        |    |
|                               |                 | 1999 | 14,388             | 10,132 | 18,739 | 31    | 139.49 | 98.23  | 181.67 | 27     |        |    |
|                               |                 | 2000 | 13,361             | 9,837  | 18,616 | 30    | 127.08 | 93.57  | 177.07 | 32     |        |    |
|                               |                 | 2001 | 13,664             | 10,280 | 18,417 | 32    | 127.95 | 96.27  | 172.46 | 31     |        |    |
|                               |                 | 2002 | 13,036             | 10,707 | 18,833 | 31    | 119.58 | 98.22  | 172.75 | 33     |        |    |
|                               |                 | 2003 | 12,927             | 10,162 | 19,191 | 31    | 116.55 | 91.62  | 173.04 | 32     |        |    |
|                               |                 | 2004 | 12,722             | 9,527  | 19,598 | 31    | 112.29 | 84.09  | 172.99 | 33     |        |    |
|                               |                 | 2005 | 12,302             | 8,801  | 19,978 | 34    | 106.49 | 76.18  | 172.93 | 39     |        |    |
|                               |                 | 2006 | 11,989             | 8,116  | 20,670 | 35    | 100.87 | 68.28  | 173.89 | 42     |        |    |
|                               |                 | 2007 | 11,590             | 7,361  | 21,357 | 35    | 94.89  | 60.27  | 174.85 | 47     |        |    |
|                               |                 |      | Non-Hispanic White | 1992   | 5,459  | 4,912 | 5,935  | 45     | 136.24 | 122.59 | 148.14 | 23 |
|                               |                 |      |                    | 1993   | 5,042  | 3,518 | 6,206  | 44     | 124.92 | 87.16  | 153.77 | 26 |
|                               |                 |      |                    | 1994   | 5,436  | 4,544 | 6,276  | 42     | 132.77 | 110.99 | 153.28 | 22 |
|                               |                 |      |                    | 1995   | 4,768  | 3,633 | 6,140  | 46     | 115.12 | 87.71  | 148.23 | 27 |
| 1996                          | 4,414           |      |                    | 3,505  | 5,807  | 47    | 106.32 | 84.44  | 139.89 | 28     |        |    |
| 1997                          | 3,996           |      |                    | 3,045  | 5,364  | 48    | 95.68  | 72.90  | 128.43 | 36     |        |    |
| 1998                          | 3,583           |      |                    | 2,658  | 4,864  | 59    | 85.11  | 63.14  | 115.54 | 45     |        |    |
| 1999                          | 3,320           |      |                    | 2,338  | 4,325  | 69    | 78.34  | 55.17  | 102.03 | 53     |        |    |
| 2000                          | 2,859           |      |                    | 2,105  | 3,983  | 73    | 67.28  | 49.54  | 93.74  | 56     |        |    |
| 2001                          | 2,690           |      |                    | 2,024  | 3,626  | 77    | 63.06  | 47.44  | 84.99  | 60     |        |    |
| 2002                          | 2,354           |      |                    | 1,933  | 3,401  | 80    | 54.69  | 44.92  | 79.01  | 67     |        |    |
| 2003                          | 2,144           |      |                    | 1,686  | 3,183  | 83    | 49.58  | 38.98  | 73.61  | 75     |        |    |
| 2004                          | 1,951           |      |                    | 1,461  | 3,006  | 87    | 44.48  | 33.31  | 68.53  | 84     |        |    |
| 2005                          | 1,766           |      |                    | 1,263  | 2,868  | 94    | 39.84  | 28.50  | 64.69  | 87     |        |    |
| 2006                          | 1,639           |      |                    | 1,109  | 2,826  | 95    | 36.28  | 24.56  | 62.55  | 94     |        |    |
| 2007                          | 1,543           | 980  | 2,844              | 95     | 33.63  | 21.36 | 61.97  | 97     |        |        |        |    |

| Metropolitan Statistical Area | PWID Population    | Year  | Number   | Min   | Max    | Rank   | Rate   | Min    | Max    | Rank   |        |    |
|-------------------------------|--------------------|-------|----------|-------|--------|--------|--------|--------|--------|--------|--------|----|
| San Antonio, TX               | Non-Hispanic Black | 1992  | 4,137    | 3,722 | 4,498  | 27     | 711.02 | 639.75 | 773.09 | 5      |        |    |
|                               |                    | 1993  | 2,758    | 1,924 | 3,395  | 35     | 467.17 | 325.95 | 575.03 | 15     |        |    |
|                               |                    | 1994  | 2,403    | 2,009 | 2,774  | 44     | 394.99 | 330.19 | 456.02 | 23     |        |    |
|                               |                    | 1995  | 1,889    | 1,440 | 2,433  | 51     | 301.38 | 229.63 | 388.07 | 35     |        |    |
|                               |                    | 1996  | 1,719    | 1,365 | 2,262  | 52     | 269.57 | 214.09 | 354.68 | 40     |        |    |
|                               |                    | 1997  | 1,655    | 1,261 | 2,221  | 54     | 254.51 | 193.92 | 341.63 | 38     |        |    |
|                               |                    | 1998  | 1,684    | 1,249 | 2,285  | 52     | 253.50 | 188.04 | 344.12 | 33     |        |    |
|                               |                    | 1999  | 1,861    | 1,311 | 2,424  | 47     | 274.16 | 193.07 | 357.08 | 20     |        |    |
|                               |                    | 2000  | 1,979    | 1,457 | 2,758  | 40     | 286.84 | 211.19 | 399.65 | 16     |        |    |
|                               |                    | 2001  | 2,345    | 1,764 | 3,161  | 36     | 335.69 | 252.57 | 452.47 | 11     |        |    |
|                               |                    | 2002  | 2,593    | 2,130 | 3,747  | 27     | 363.54 | 298.59 | 525.19 | 9      |        |    |
|                               |                    | 2003  | 2,951    | 2,320 | 4,382  | 23     | 411.93 | 323.82 | 611.57 | 8      |        |    |
|                               |                    | 2004  | 3,271    | 2,450 | 5,039  | 23     | 443.05 | 331.77 | 682.51 | 5      |        |    |
|                               |                    | 2005  | 3,472    | 2,484 | 5,638  | 21     | 459.85 | 328.99 | 746.80 | 5      |        |    |
|                               |                    | 2006  | 3,598    | 2,436 | 6,203  | 21     | 450.03 | 304.63 | 775.85 | 6      |        |    |
|                               |                    | 2007  | 3,568    | 2,266 | 6,574  | 20     | 432.91 | 274.95 | 797.73 | 9      |        |    |
|                               |                    |       | Hispanic | 1992  | 13,014 | 11,709 | 14,150 | 4      | 308.57 | 277.64 | 335.51 | 15 |
|                               |                    |       |          | 1993  | 11,135 | 7,769  | 13,706 | 5      | 255.84 | 178.51 | 314.92 | 23 |
|                               |                    |       |          | 1994  | 11,492 | 9,607  | 13,268 | 4      | 255.97 | 213.98 | 295.52 | 20 |
|                               |                    |       |          | 1995  | 9,917  | 7,556  | 12,769 | 5      | 213.71 | 162.83 | 275.18 | 24 |
| 1996                          | 9,244              |       |          | 7,342 | 12,163 | 5      | 193.65 | 153.80 | 254.79 | 27     |        |    |
| 1997                          | 8,598              |       |          | 6,551 | 11,541 | 5      | 175.24 | 133.52 | 235.22 | 29     |        |    |
| 1998                          | 8,060              |       |          | 5,979 | 10,942 | 6      | 160.00 | 118.68 | 217.20 | 28     |        |    |
| 1999                          | 7,923              |       |          | 5,580 | 10,320 | 4      | 153.23 | 107.90 | 199.57 | 27     |        |    |
| 2000                          | 7,322              |       |          | 5,391 | 10,202 | 7      | 137.19 | 101.01 | 191.15 | 27     |        |    |
| 2001                          | 7,460              |       |          | 5,613 | 10,055 | 5      | 136.43 | 102.64 | 183.88 | 28     |        |    |
| 2002                          | 7,102              |       |          | 5,833 | 10,259 | 6      | 126.21 | 103.66 | 182.33 | 32     |        |    |
| 2003                          | 7,042              |       |          | 5,536 | 10,455 | 6      | 121.81 | 95.75  | 180.84 | 32     |        |    |
| 2004                          | 6,949              |       |          | 5,204 | 10,705 | 6      | 117.34 | 87.87  | 180.75 | 32     |        |    |
| 2005                          | 6,760              |       |          | 4,837 | 10,979 | 8      | 111.36 | 79.67  | 180.85 | 35     |        |    |
| 2006                          | 6,653              | 4,504 | 11,470   | 9     | 106.34 | 71.98  | 183.33 | 33     |        |        |        |    |
| 2007                          | 6,521              | 4,142 | 12,016   | 11    | 100.78 | 64.00  | 185.70 | 37     |        |        |        |    |

| Metropolitan Statistical Area | PWID Population | Year   | Number | Min    | Max    | Rank   | Rate   | Min    | Max    | Rank   |    |
|-------------------------------|-----------------|--------|--------|--------|--------|--------|--------|--------|--------|--------|----|
| San Antonio, TX               | Male            | 1992   | 16,885 | 15,193 | 18,360 | 9      | 383.80 | 345.33 | 417.30 | 2      |    |
|                               |                 | 1993   | 14,031 | 9,790  | 17,271 | 18     | 313.12 | 218.47 | 385.42 | 6      |    |
|                               |                 | 1994   | 14,195 | 11,866 | 16,388 | 16     | 308.66 | 258.02 | 356.35 | 7      |    |
|                               |                 | 1995   | 12,108 | 9,226  | 15,591 | 24     | 257.26 | 196.02 | 331.26 | 11     |    |
|                               |                 | 1996   | 11,235 | 8,923  | 14,783 | 24     | 234.80 | 186.48 | 308.94 | 12     |    |
|                               |                 | 1997   | 10,458 | 7,968  | 14,037 | 26     | 214.59 | 163.51 | 288.05 | 18     |    |
|                               |                 | 1998   | 9,844  | 7,302  | 13,363 | 27     | 198.22 | 147.04 | 269.08 | 23     |    |
|                               |                 | 1999   | 9,729  | 6,851  | 12,671 | 29     | 192.20 | 135.35 | 250.33 | 22     |    |
|                               |                 | 2000   | 9,033  | 6,651  | 12,586 | 28     | 175.04 | 128.88 | 243.88 | 29     |    |
|                               |                 | 2001   | 9,221  | 6,937  | 12,428 | 31     | 175.78 | 132.25 | 236.93 | 26     |    |
|                               |                 | 2002   | 8,752  | 7,189  | 12,644 | 31     | 163.41 | 134.22 | 236.07 | 29     |    |
|                               |                 | 2003   | 8,593  | 6,755  | 12,757 | 32     | 158.05 | 124.24 | 234.64 | 29     |    |
|                               |                 | 2004   | 8,317  | 6,228  | 12,812 | 32     | 149.47 | 111.93 | 230.25 | 35     |    |
|                               |                 | 2005   | 7,837  | 5,607  | 12,727 | 36     | 138.01 | 98.73  | 224.12 | 38     |    |
|                               |                 | 2006   | 7,354  | 4,978  | 12,677 | 38     | 125.76 | 85.13  | 216.81 | 43     |    |
|                               | 2007            | 6,734  | 4,277  | 12,409 | 39     | 112.01 | 71.14  | 206.40 | 52     |        |    |
|                               |                 | Female | 1992   | 6,558  | 5,900  | 7,130  | 23     | 143.86 | 129.44 | 156.41 | 13 |
|                               |                 |        | 1993   | 6,012  | 4,195  | 7,400  | 25     | 128.99 | 90.00  | 158.78 | 16 |
|                               |                 |        | 1994   | 6,534  | 5,462  | 7,543  | 23     | 137.05 | 114.56 | 158.22 | 14 |
|                               |                 |        | 1995   | 5,854  | 4,460  | 7,538  | 25     | 119.75 | 91.24  | 154.20 | 16 |
|                               |                 |        | 1996   | 5,603  | 4,450  | 7,373  | 26     | 112.67 | 89.48  | 148.24 | 16 |
|                               |                 |        | 1997   | 5,306  | 4,043  | 7,123  | 26     | 104.76 | 79.82  | 140.62 | 20 |
|                               |                 |        | 1998   | 5,033  | 3,733  | 6,832  | 27     | 97.52  | 72.34  | 132.38 | 21 |
|                               |                 |        | 1999   | 4,985  | 3,511  | 6,493  | 33     | 94.90  | 66.83  | 123.61 | 27 |
|                               |                 |        | 2000   | 4,633  | 3,411  | 6,455  | 32     | 86.55  | 63.73  | 120.59 | 35 |
|                               | 2001            |        | 4,747  | 3,572  | 6,398  | 34     | 87.37  | 65.73  | 117.76 | 34     |    |
|                               | 2002            | 4,555  | 3,741  | 6,580  | 33     | 82.14  | 67.46  | 118.66 | 34     |        |    |
|                               | 2003            | 4,572  | 3,594  | 6,787  | 34     | 80.86  | 63.57  | 120.05 | 34     |        |    |
|                               | 2004            | 4,595  | 3,441  | 7,078  | 34     | 79.70  | 59.68  | 122.78 | 35     |        |    |
|                               | 2005            | 4,588  | 3,283  | 7,451  | 34     | 78.11  | 55.88  | 126.85 | 37     |        |    |
|                               | 2006            | 4,678  | 3,167  | 8,065  | 34     | 77.46  | 52.44  | 133.55 | 36     |        |    |
|                               | 2007            | 4,800  | 3,048  | 8,845  | 32     | 77.39  | 49.15  | 142.61 | 34     |        |    |

| Metropolitan Statistical Area | PWID Population | Year  | Number      | Min   | Max    | Rank   | Rate   | Min    | Max    | Rank   |        |    |
|-------------------------------|-----------------|-------|-------------|-------|--------|--------|--------|--------|--------|--------|--------|----|
| San Antonio, TX               | Young (15-29)   | 1992  | 8,191       | 7,370 | 8,906  | 8      | 249.05 | 224.08 | 270.79 | 5      |        |    |
|                               |                 | 1993  | 6,533       | 4,558 | 8,042  | 14     | 199.00 | 138.85 | 244.95 | 6      |        |    |
|                               |                 | 1994  | 6,427       | 5,373 | 7,420  | 14     | 193.93 | 162.12 | 223.89 | 7      |        |    |
|                               |                 | 1995  | 5,397       | 4,112 | 6,949  | 18     | 160.72 | 122.45 | 206.94 | 11     |        |    |
|                               |                 | 1996  | 4,985       | 3,959 | 6,560  | 19     | 147.28 | 116.97 | 193.78 | 14     |        |    |
|                               |                 | 1997  | 4,667       | 3,556 | 6,264  | 21     | 135.92 | 103.57 | 182.45 | 18     |        |    |
|                               |                 | 1998  | 4,457       | 3,306 | 6,050  | 22     | 127.60 | 94.65  | 173.21 | 27     |        |    |
|                               |                 | 1999  | 4,503       | 3,171 | 5,865  | 22     | 127.14 | 89.53  | 165.59 | 29     |        |    |
|                               |                 | 2000  | 4,302       | 3,167 | 5,994  | 25     | 120.04 | 88.39  | 167.26 | 32     |        |    |
|                               |                 | 2001  | 4,541       | 3,416 | 6,120  | 25     | 125.68 | 94.56  | 169.40 | 31     |        |    |
|                               |                 | 2002  | 4,474       | 3,675 | 6,464  | 26     | 121.71 | 99.97  | 175.83 | 34     |        |    |
|                               |                 | 2003  | 4,574       | 3,596 | 6,791  | 27     | 123.00 | 96.69  | 182.61 | 28     |        |    |
|                               |                 | 2004  | 4,621       | 3,461 | 7,119  | 27     | 121.35 | 90.87  | 186.93 | 31     |        |    |
|                               |                 | 2005  | 4,558       | 3,261 | 7,402  | 29     | 117.33 | 83.94  | 190.54 | 34     |        |    |
|                               |                 | 2006  | 4,492       | 3,041 | 7,744  | 28     | 112.21 | 75.95  | 193.44 | 38     |        |    |
|                               |                 | 2007  | 4,344       | 2,759 | 8,004  | 29     | 105.25 | 66.84  | 193.94 | 40     |        |    |
|                               |                 |       | Old (30-64) | 1992  | 15,092 | 13,580 | 16,410 | 22     | 266.22 | 239.53 | 289.46 | 8  |
|                               |                 |       |             | 1993  | 13,381 | 9,337  | 16,471 | 25     | 228.40 | 159.36 | 281.14 | 11 |
|                               |                 |       |             | 1994  | 14,185 | 11,858 | 16,377 | 21     | 234.39 | 195.93 | 270.60 | 11 |
|                               |                 |       |             | 1995  | 12,487 | 9,514  | 16,079 | 25     | 200.21 | 152.55 | 257.81 | 15 |
| 1996                          | 11,806          |       |             | 9,377 | 15,534 | 27     | 185.25 | 147.13 | 243.74 | 18     |        |    |
| 1997                          | 11,080          |       |             | 8,443 | 14,873 | 27     | 170.33 | 129.78 | 228.63 | 21     |        |    |
| 1998                          | 10,428          |       |             | 7,736 | 14,157 | 28     | 157.19 | 116.60 | 213.39 | 21     |        |    |
| 1999                          | 10,240          |       |             | 7,211 | 13,337 | 31     | 151.19 | 106.47 | 196.92 | 26     |        |    |
| 2000                          | 9,404           |       |             | 6,924 | 13,103 | 29     | 135.70 | 99.91  | 189.07 | 29     |        |    |
| 2001                          | 9,471           |       |             | 7,126 | 12,766 | 32     | 134.04 | 100.85 | 180.67 | 28     |        |    |
| 2002                          | 8,867           |       |             | 7,283 | 12,810 | 31     | 122.72 | 100.80 | 177.29 | 32     |        |    |
| 2003                          | 8,601           |       |             | 6,761 | 12,770 | 32     | 116.67 | 91.72  | 173.22 | 31     |        |    |
| 2004                          | 8,260           |       |             | 6,185 | 12,724 | 33     | 109.83 | 82.24  | 169.19 | 31     |        |    |
| 2005                          | 7,779           |       |             | 5,565 | 12,633 | 33     | 101.44 | 72.58  | 164.75 | 38     |        |    |
| 2006                          | 7,374           | 4,991 | 12,712      | 33    | 93.54  | 63.32  | 161.25 | 41     |        |        |        |    |
| 2007                          | 6,929           | 4,400 | 12,767      | 33    | 85.67  | 54.41  | 157.87 | 43     |        |        |        |    |



| Metropolitan Statistical Area | PWID Population | Year  | Number             | Min    | Max    | Rank   | Rate   | Min    | Max    | Rank  |        |    |
|-------------------------------|-----------------|-------|--------------------|--------|--------|--------|--------|--------|--------|-------|--------|----|
| San Diego, CA                 | Total           | 1992  | 24,835             | 19,297 | 34,330 | 13     | 142.76 | 110.93 | 197.34 | 35    |        |    |
|                               |                 | 1993  | 28,016             | 19,909 | 37,635 | 10     | 161.90 | 115.05 | 217.49 | 24    |        |    |
|                               |                 | 1994  | 24,920             | 20,108 | 34,010 | 13     | 143.89 | 116.10 | 196.38 | 33    |        |    |
|                               |                 | 1995  | 27,130             | 19,714 | 33,939 | 10     | 156.71 | 113.87 | 196.04 | 23    |        |    |
|                               |                 | 1996  | 26,940             | 19,504 | 34,271 | 9      | 154.31 | 111.72 | 196.30 | 22    |        |    |
|                               |                 | 1997  | 27,039             | 19,497 | 34,981 | 10     | 151.94 | 109.56 | 196.57 | 24    |        |    |
|                               |                 | 1998  | 26,805             | 17,800 | 35,848 | 11     | 147.20 | 97.75  | 196.86 | 23    |        |    |
|                               |                 | 1999  | 26,469             | 16,050 | 36,823 | 10     | 141.72 | 85.94  | 197.16 | 25    |        |    |
|                               |                 | 2000  | 26,246             | 13,637 | 38,073 | 11     | 138.28 | 71.85  | 200.60 | 23    |        |    |
|                               |                 | 2001  | 26,698             | 11,169 | 39,454 | 11     | 138.07 | 57.76  | 204.04 | 25    |        |    |
|                               |                 | 2002  | 25,714             | 9,325  | 41,335 | 11     | 130.91 | 47.47  | 210.44 | 27    |        |    |
|                               |                 | 2003  | 25,360             | 7,359  | 42,913 | 13     | 128.14 | 37.18  | 216.83 | 27    |        |    |
|                               |                 | 2004  | 25,170             | 6,326  | 44,411 | 14     | 126.87 | 31.89  | 223.85 | 26    |        |    |
|                               |                 | 2005  | 24,996             | 5,291  | 45,940 | 15     | 125.61 | 26.59  | 230.86 | 26    |        |    |
|                               |                 | 2006  | 24,946             | 4,517  | 47,620 | 15     | 124.83 | 22.60  | 238.29 | 25    |        |    |
|                               |                 | 2007  | 24,991             | 3,751  | 49,503 | 15     | 124.05 | 18.62  | 245.72 | 26    |        |    |
|                               |                 |       | Non-Hispanic White | 1992   | 13,840 | 10,754 | 19,131 | 12     | 124.61 | 96.82 | 172.25 | 26 |
|                               |                 |       |                    | 1993   | 14,925 | 10,606 | 20,050 | 9      | 137.44 | 97.67 | 184.63 | 22 |
|                               |                 |       |                    | 1994   | 12,785 | 10,316 | 17,449 | 12     | 119.56 | 96.47 | 163.18 | 24 |
|                               |                 |       |                    | 1995   | 13,499 | 9,810  | 16,887 | 9      | 128.23 | 93.18 | 160.42 | 20 |
| 1996                          | 13,085          |       |                    | 9,473  | 16,646 | 9      | 125.03 | 90.52  | 159.06 | 20    |        |    |
| 1997                          | 12,892          |       |                    | 9,296  | 16,679 | 11     | 122.33 | 88.21  | 158.26 | 19    |        |    |
| 1998                          | 12,605          |       |                    | 8,371  | 16,858 | 11     | 118.22 | 78.51  | 158.11 | 22    |        |    |
| 1999                          | 12,323          |       |                    | 7,472  | 17,144 | 13     | 113.94 | 69.09  | 158.50 | 27    |        |    |
| 2000                          | 12,129          |       |                    | 6,302  | 17,595 | 12     | 111.75 | 58.06  | 162.12 | 22    |        |    |
| 2001                          | 12,267          |       |                    | 5,132  | 18,128 | 15     | 111.81 | 46.77  | 165.23 | 26    |        |    |
| 2002                          | 11,753          |       |                    | 4,262  | 18,893 | 15     | 106.39 | 38.58  | 171.01 | 28    |        |    |
| 2003                          | 11,523          |       |                    | 3,344  | 19,499 | 16     | 104.44 | 30.31  | 176.73 | 29    |        |    |
| 2004                          | 11,351          |       |                    | 2,853  | 20,028 | 16     | 103.65 | 26.05  | 182.89 | 31    |        |    |
| 2005                          | 11,158          |       |                    | 2,362  | 20,508 | 17     | 102.67 | 21.73  | 188.70 | 32    |        |    |
| 2006                          | 10,982          | 1,989 | 20,963             | 18     | 101.43 | 18.37  | 193.63 | 32     |        |       |        |    |
| 2007                          | 10,798          | 1,621 | 21,390             | 19     | 99.94  | 15.00  | 197.96 | 36     |        |       |        |    |

| Metropolitan Statistical Area | PWID Population    | Year  | Number   | Min   | Max    | Rank  | Rate   | Min    | Max    | Rank   |        |    |
|-------------------------------|--------------------|-------|----------|-------|--------|-------|--------|--------|--------|--------|--------|----|
| San Diego, CA                 | Non-Hispanic Black | 1992  | 3,083    | 2,395 | 4,262  | 35    | 289.08 | 224.62 | 399.61 | 52     |        |    |
|                               |                    | 1993  | 3,473    | 2,468 | 4,665  | 28    | 331.13 | 235.31 | 444.83 | 37     |        |    |
|                               |                    | 1994  | 3,063    | 2,472 | 4,181  | 33    | 292.10 | 235.69 | 398.65 | 45     |        |    |
|                               |                    | 1995  | 3,286    | 2,388 | 4,111  | 28    | 313.49 | 227.80 | 392.16 | 33     |        |    |
|                               |                    | 1996  | 3,196    | 2,314 | 4,066  | 29    | 302.54 | 219.03 | 384.87 | 28     |        |    |
|                               |                    | 1997  | 3,127    | 2,255 | 4,046  | 28    | 290.76 | 209.67 | 376.17 | 25     |        |    |
|                               |                    | 1998  | 3,009    | 1,998 | 4,024  | 26    | 274.80 | 182.48 | 367.51 | 26     |        |    |
|                               |                    | 1999  | 2,873    | 1,742 | 3,997  | 27    | 256.21 | 155.36 | 356.44 | 25     |        |    |
|                               |                    | 2000  | 2,748    | 1,428 | 3,986  | 26    | 242.54 | 126.01 | 351.83 | 27     |        |    |
|                               |                    | 2001  | 2,690    | 1,125 | 3,975  | 28    | 236.45 | 98.92  | 349.42 | 24     |        |    |
|                               |                    | 2002  | 2,490    | 903   | 4,002  | 28    | 218.61 | 79.27  | 351.41 | 28     |        |    |
|                               |                    | 2003  | 2,358    | 684   | 3,991  | 29    | 210.19 | 60.99  | 355.68 | 28     |        |    |
|                               |                    | 2004  | 2,250    | 565   | 3,970  | 32    | 202.00 | 50.77  | 356.41 | 31     |        |    |
|                               |                    | 2005  | 2,153    | 456   | 3,957  | 33    | 196.52 | 41.60  | 361.19 | 32     |        |    |
|                               |                    | 2006  | 2,080    | 377   | 3,970  | 33    | 190.60 | 34.51  | 363.82 | 37     |        |    |
|                               |                    | 2007  | 2,032    | 305   | 4,025  | 35    | 187.92 | 28.21  | 372.24 | 40     |        |    |
|                               |                    |       | Hispanic | 1992  | 6,545  | 5,086 | 9,048  | 11     | 179.61 | 139.56 | 248.28 | 36 |
|                               |                    |       |          | 1993  | 7,617  | 5,413 | 10,232 | 8      | 202.89 | 144.18 | 272.55 | 31 |
|                               |                    |       |          | 1994  | 6,903  | 5,570 | 9,421  | 9      | 178.19 | 143.78 | 243.19 | 29 |
|                               |                    |       |          | 1995  | 7,581  | 5,509 | 9,484  | 7      | 190.60 | 138.50 | 238.43 | 29 |
| 1996                          | 7,535              |       |          | 5,455 | 9,586  | 7     | 183.08 | 132.54 | 232.90 | 31     |        |    |
| 1997                          | 7,526              |       |          | 5,427 | 9,737  | 8     | 175.58 | 126.61 | 227.15 | 28     |        |    |
| 1998                          | 7,399              |       |          | 4,913 | 9,895  | 8     | 165.14 | 109.66 | 220.86 | 26     |        |    |
| 1999                          | 7,234              |       |          | 4,386 | 10,064 | 6     | 154.59 | 93.74  | 215.06 | 26     |        |    |
| 2000                          | 7,107              |       |          | 3,692 | 10,309 | 8     | 146.31 | 76.02  | 212.25 | 25     |        |    |
| 2001                          | 7,183              |       |          | 3,005 | 10,615 | 7     | 142.96 | 59.81  | 211.26 | 24     |        |    |
| 2002                          | 6,910              |       |          | 2,506 | 11,108 | 7     | 133.12 | 48.27  | 213.99 | 25     |        |    |
| 2003                          | 6,859              |       |          | 1,990 | 11,607 | 7     | 128.91 | 37.41  | 218.13 | 28     |        |    |
| 2004                          | 6,920              |       |          | 1,739 | 12,211 | 7     | 127.43 | 32.03  | 224.85 | 26     |        |    |
| 2005                          | 7,074              |       |          | 1,497 | 13,001 | 7     | 127.22 | 26.93  | 233.81 | 24     |        |    |
| 2006                          | 7,373              |       |          | 1,335 | 14,074 | 7     | 130.11 | 23.56  | 248.35 | 26     |        |    |
| 2007                          | 7,841              | 1,177 | 15,531   | 6     | 134.76 | 20.23 | 266.94 | 25     |        |        |        |    |

| Metropolitan Statistical Area | PWID Population | Year   | Number | Min    | Max    | Rank   | Rate   | Min    | Max    | Rank |
|-------------------------------|-----------------|--------|--------|--------|--------|--------|--------|--------|--------|------|
| San Diego, CA                 | Male            | 1992   | 15,258 | 11,856 | 21,091 | 15     | 167.94 | 130.49 | 232.15 | 39   |
|                               |                 | 1993   | 17,580 | 12,493 | 23,617 | 11     | 195.53 | 138.95 | 262.66 | 33   |
|                               |                 | 1994   | 15,900 | 12,829 | 21,700 | 11     | 177.20 | 142.98 | 241.84 | 34   |
|                               |                 | 1995   | 17,535 | 12,742 | 21,936 | 9      | 195.95 | 142.39 | 245.13 | 29   |
|                               |                 | 1996   | 17,588 | 12,733 | 22,374 | 11     | 195.22 | 141.34 | 248.35 | 29   |
|                               |                 | 1997   | 17,791 | 12,829 | 23,017 | 11     | 194.03 | 139.91 | 251.03 | 26   |
|                               |                 | 1998   | 17,748 | 11,785 | 23,736 | 11     | 189.62 | 125.92 | 253.60 | 27   |
|                               |                 | 1999   | 17,618 | 10,683 | 24,510 | 11     | 183.60 | 111.33 | 255.41 | 26   |
|                               |                 | 2000   | 17,555 | 9,121  | 25,466 | 11     | 180.30 | 93.68  | 261.55 | 26   |
|                               |                 | 2001   | 17,946 | 7,508  | 26,521 | 11     | 180.79 | 75.63  | 267.17 | 25   |
|                               |                 | 2002   | 17,382 | 6,303  | 27,942 | 11     | 172.21 | 62.45  | 276.83 | 25   |
|                               |                 | 2003   | 17,259 | 5,008  | 29,204 | 12     | 170.50 | 49.48  | 288.51 | 24   |
|                               |                 | 2004   | 17,271 | 4,341  | 30,475 | 12     | 170.53 | 42.86  | 300.90 | 23   |
|                               |                 | 2005   | 17,329 | 3,668  | 31,850 | 12     | 170.24 | 36.04  | 312.89 | 23   |
|                               | 2006            | 17,514 | 3,171  | 33,432 | 12     | 170.94 | 30.95  | 326.31 | 22     |      |
|                               | 2007            | 17,813 | 2,674  | 35,284 | 12     | 172.63 | 25.91  | 341.95 | 22     |      |
|                               | Female          | 1992   | 9,497  | 7,379  | 13,128 | 12     | 114.26 | 88.78  | 157.95 | 24   |
|                               |                 | 1993   | 10,385 | 7,380  | 13,951 | 11     | 124.92 | 88.77  | 167.81 | 19   |
|                               |                 | 1994   | 9,014  | 7,273  | 12,302 | 13     | 108.00 | 87.14  | 147.39 | 25   |
|                               |                 | 1995   | 9,631  | 6,998  | 12,048 | 13     | 115.14 | 83.67  | 144.04 | 19   |
|                               |                 | 1996   | 9,429  | 6,826  | 11,995 | 13     | 111.60 | 80.79  | 141.96 | 18   |
|                               |                 | 1997   | 9,364  | 6,752  | 12,114 | 13     | 108.54 | 78.27  | 140.43 | 17   |
|                               |                 | 1998   | 9,206  | 6,113  | 12,312 | 13     | 104.02 | 69.07  | 139.12 | 19   |
|                               |                 | 1999   | 9,025  | 5,473  | 12,556 | 11     | 99.39  | 60.27  | 138.27 | 24   |
|                               |                 | 2000   | 8,883  | 4,615  | 12,886 | 14     | 96.11  | 49.93  | 139.41 | 22   |
|                               |                 | 2001   | 8,956  | 3,747  | 13,235 | 12     | 95.18  | 39.82  | 140.66 | 29   |
| 2002                          |                 | 8,526  | 3,092  | 13,706 | 16     | 89.29  | 32.38  | 143.53 | 28     |      |
| 2003                          |                 | 8,277  | 2,402  | 14,007 | 15     | 85.61  | 24.84  | 144.87 | 31     |      |
| 2004                          |                 | 8,042  | 2,021  | 14,190 | 15     | 82.81  | 20.81  | 146.12 | 29     |      |
| 2005                          |                 | 7,765  | 1,644  | 14,271 | 15     | 79.88  | 16.91  | 146.82 | 33     |      |
| 2006                          | 7,470           | 1,353  | 14,259 | 17     | 76.71  | 13.89  | 146.43 | 38     |        |      |
| 2007                          | 7,141           | 1,072  | 14,145 | 19     | 72.66  | 10.91  | 143.94 | 41     |        |      |

| Metropolitan Statistical Area | PWID Population | Year  | Number      | Min    | Max    | Rank   | Rate   | Min    | Max    | Rank   |        |    |
|-------------------------------|-----------------|-------|-------------|--------|--------|--------|--------|--------|--------|--------|--------|----|
| San Diego, CA                 | Young (15-29)   | 1992  | 6,342       | 4,928  | 8,766  | 17     | 95.72  | 74.38  | 132.32 | 43     |        |    |
|                               |                 | 1993  | 6,722       | 4,777  | 9,030  | 13     | 105.00 | 74.61  | 141.05 | 36     |        |    |
|                               |                 | 1994  | 5,750       | 4,639  | 7,847  | 17     | 91.76  | 74.04  | 125.24 | 44     |        |    |
|                               |                 | 1995  | 6,144       | 4,465  | 7,686  | 13     | 99.71  | 72.46  | 124.74 | 42     |        |    |
|                               |                 | 1996  | 6,095       | 4,413  | 7,754  | 12     | 99.16  | 71.79  | 126.14 | 41     |        |    |
|                               |                 | 1997  | 6,199       | 4,470  | 8,020  | 12     | 99.72  | 71.91  | 129.02 | 41     |        |    |
|                               |                 | 1998  | 6,293       | 4,179  | 8,417  | 12     | 99.62  | 66.15  | 133.23 | 42     |        |    |
|                               |                 | 1999  | 6,410       | 3,887  | 8,918  | 11     | 99.15  | 60.12  | 137.93 | 40     |        |    |
|                               |                 | 2000  | 6,580       | 3,419  | 9,545  | 12     | 100.54 | 52.24  | 145.85 | 46     |        |    |
|                               |                 | 2001  | 6,931       | 2,899  | 10,242 | 13     | 104.48 | 43.71  | 154.41 | 43     |        |    |
|                               |                 | 2002  | 6,891       | 2,499  | 11,078 | 12     | 102.43 | 37.14  | 164.65 | 45     |        |    |
|                               |                 | 2003  | 6,973       | 2,023  | 11,799 | 13     | 103.81 | 30.12  | 175.65 | 48     |        |    |
|                               |                 | 2004  | 7,035       | 1,768  | 12,413 | 14     | 105.02 | 26.40  | 185.30 | 49     |        |    |
|                               |                 | 2005  | 7,017       | 1,485  | 12,896 | 15     | 104.03 | 22.02  | 191.19 | 48     |        |    |
|                               |                 | 2006  | 6,927       | 1,254  | 13,222 | 16     | 101.75 | 18.43  | 194.23 | 45     |        |    |
|                               |                 | 2007  | 6,738       | 1,011  | 13,347 | 17     | 98.19  | 14.74  | 194.50 | 47     |        |    |
|                               |                 |       | Old (30-64) | 1992   | 18,774 | 14,588 | 25,951 | 13     | 174.29 | 135.43 | 240.93 | 31 |
|                               |                 |       |             | 1993   | 21,455 | 15,246 | 28,821 | 12     | 196.78 | 139.84 | 264.35 | 22 |
|                               |                 |       |             | 1994   | 19,248 | 15,531 | 26,269 | 12     | 174.14 | 140.51 | 237.66 | 22 |
|                               |                 |       |             | 1995   | 21,058 | 15,302 | 26,343 | 14     | 188.85 | 137.23 | 236.25 | 19 |
| 1996                          | 20,947          |       |             | 15,165 | 26,648 | 13     | 185.19 | 134.07 | 235.58 | 19     |        |    |
| 1997                          | 21,001          |       |             | 15,143 | 27,169 | 12     | 181.35 | 130.77 | 234.62 | 17     |        |    |
| 1998                          | 20,739          |       |             | 13,772 | 27,736 | 12     | 174.40 | 115.81 | 233.24 | 17     |        |    |
| 1999                          | 20,351          |       |             | 12,340 | 28,311 | 11     | 166.65 | 101.05 | 231.84 | 19     |        |    |
| 2000                          | 20,006          |       |             | 10,395 | 29,022 | 13     | 160.89 | 83.59  | 233.39 | 17     |        |    |
| 2001                          | 20,137          |       |             | 8,424  | 29,759 | 11     | 158.52 | 66.32  | 234.27 | 18     |        |    |
| 2002                          | 19,161          |       |             | 6,949  | 30,802 | 13     | 148.37 | 53.80  | 238.50 | 18     |        |    |
| 2003                          | 18,648          |       |             | 5,411  | 31,556 | 13     | 142.64 | 41.39  | 241.37 | 18     |        |    |
| 2004                          | 18,252          |       |             | 4,587  | 32,204 | 14     | 138.90 | 34.91  | 245.08 | 17     |        |    |
| 2005                          | 17,870          |       |             | 3,783  | 32,843 | 14     | 135.85 | 28.76  | 249.68 | 16     |        |    |
| 2006                          | 17,582          | 3,184 | 33,562      | 13     | 133.44 | 24.16  | 254.71 | 15     |        |        |        |    |
| 2007                          | 17,365          | 2,607 | 34,397      | 12     | 130.72 | 19.62  | 258.94 | 15     |        |        |        |    |

| Metropolitan Statistical Area | PWID Population | Year  | Number             | Min    | Max    | Rank   | Rate   | Min    | Max    | Rank   |        |   |
|-------------------------------|-----------------|-------|--------------------|--------|--------|--------|--------|--------|--------|--------|--------|---|
| San Francisco, CA             | Total           | 1992  | 30,862             | 23,461 | 38,352 | 6      | 269.30 | 204.72 | 334.66 | 3      |        |   |
|                               |                 | 1993  | 33,161             | 24,229 | 44,380 | 7      | 287.80 | 210.28 | 385.16 | 3      |        |   |
|                               |                 | 1994  | 27,925             | 24,934 | 32,683 | 9      | 241.74 | 215.85 | 282.94 | 4      |        |   |
|                               |                 | 1995  | 30,401             | 23,979 | 42,019 | 8      | 262.04 | 206.69 | 362.19 | 3      |        |   |
|                               |                 | 1996  | 29,484             | 22,797 | 40,838 | 8      | 251.82 | 194.70 | 348.79 | 3      |        |   |
|                               |                 | 1997  | 29,032             | 22,684 | 39,867 | 8      | 243.01 | 189.87 | 333.69 | 5      |        |   |
|                               |                 | 1998  | 29,221             | 23,385 | 38,666 | 8      | 240.77 | 192.68 | 318.59 | 5      |        |   |
|                               |                 | 1999  | 26,898             | 24,949 | 30,097 | 9      | 219.71 | 203.80 | 245.85 | 5      |        |   |
|                               |                 | 2000  | 29,835             | 26,698 | 34,136 | 9      | 241.93 | 216.50 | 276.81 | 5      |        |   |
|                               |                 | 2001  | 29,844             | 28,421 | 32,059 | 9      | 241.08 | 229.59 | 258.98 | 5      |        |   |
|                               |                 | 2002  | 30,217             | 27,625 | 32,585 | 9      | 246.50 | 225.35 | 265.81 | 4      |        |   |
|                               |                 | 2003  | 30,342             | 24,264 | 33,163 | 9      | 249.62 | 199.61 | 272.82 | 4      |        |   |
|                               |                 | 2004  | 30,014             | 21,430 | 33,862 | 9      | 248.20 | 177.21 | 280.01 | 4      |        |   |
|                               |                 | 2005  | 29,355             | 18,901 | 34,817 | 9      | 242.31 | 156.01 | 287.40 | 5      |        |   |
|                               |                 | 2006  | 28,737             | 16,429 | 35,942 | 10     | 235.82 | 134.82 | 294.94 | 5      |        |   |
|                               |                 | 2007  | 28,088             | 14,111 | 37,203 | 13     | 228.39 | 114.74 | 302.50 | 6      |        |   |
|                               |                 |       | Non-Hispanic White | 1992   | 19,427 | 14,769 | 24,143 | 5      | 297.69 | 226.31 | 369.94 | 2 |
|                               |                 |       |                    | 1993   | 20,397 | 14,903 | 27,298 | 4      | 314.69 | 229.93 | 421.15 | 1 |
|                               |                 |       |                    | 1994   | 16,676 | 14,890 | 19,518 | 6      | 259.52 | 231.72 | 303.74 | 2 |
|                               |                 |       |                    | 1995   | 17,530 | 13,827 | 24,230 | 5      | 274.42 | 216.45 | 379.30 | 1 |
| 1996                          | 16,346          |       |                    | 12,638 | 22,640 | 6      | 255.79 | 197.77 | 354.28 | 1      |        |   |
| 1997                          | 15,429          |       |                    | 12,055 | 21,186 | 6      | 238.01 | 185.96 | 326.82 | 3      |        |   |
| 1998                          | 14,867          |       |                    | 11,898 | 19,672 | 6      | 226.77 | 181.47 | 300.06 | 4      |        |   |
| 1999                          | 13,112          |       |                    | 12,163 | 14,672 | 11     | 199.24 | 184.81 | 222.94 | 5      |        |   |
| 2000                          | 13,980          |       |                    | 12,511 | 15,996 | 8      | 212.62 | 190.27 | 243.27 | 4      |        |   |
| 2001                          | 13,523          |       |                    | 12,878 | 14,527 | 12     | 205.58 | 195.78 | 220.84 | 5      |        |   |
| 2002                          | 13,357          |       |                    | 12,211 | 14,404 | 9      | 206.63 | 188.90 | 222.82 | 4      |        |   |
| 2003                          | 13,237          |       |                    | 10,586 | 14,468 | 9      | 207.86 | 166.22 | 227.18 | 4      |        |   |
| 2004                          | 13,107          |       |                    | 9,358  | 14,787 | 12     | 207.81 | 148.37 | 234.45 | 4      |        |   |
| 2005                          | 13,038          |       |                    | 8,394  | 15,464 | 13     | 206.97 | 133.26 | 245.48 | 5      |        |   |
| 2006                          | 13,201          | 7,547 | 16,511             | 13     | 208.78 | 119.36 | 261.12 | 6      |        |        |        |   |
| 2007                          | 13,567          | 6,816 | 17,970             | 13     | 213.48 | 107.25 | 282.76 | 5      |        |        |        |   |

| Metropolitan Statistical Area | PWID Population    | Year  | Number   | Min   | Max    | Rank  | Rate    | Min     | Max     | Rank   |        |    |
|-------------------------------|--------------------|-------|----------|-------|--------|-------|---------|---------|---------|--------|--------|----|
| San Francisco, CA             | Non-Hispanic Black | 1992  | 6,011    | 4,569 | 7,470  | 19    | 789.10  | 599.88  | 980.61  | 3      |        |    |
|                               |                    | 1993  | 6,470    | 4,727 | 8,659  | 14    | 869.51  | 635.31  | 1163.67 | 2      |        |    |
|                               |                    | 1994  | 5,575    | 4,978 | 6,525  | 19    | 770.32  | 687.81  | 901.59  | 3      |        |    |
|                               |                    | 1995  | 6,315    | 4,981 | 8,728  | 15    | 890.08  | 702.05  | 1230.24 | 1      |        |    |
|                               |                    | 1996  | 6,451    | 4,988 | 8,935  | 14    | 926.19  | 716.10  | 1282.83 | 1      |        |    |
|                               |                    | 1997  | 6,744    | 5,270 | 9,261  | 14    | 975.70  | 762.35  | 1339.80 | 1      |        |    |
|                               |                    | 1998  | 7,234    | 5,789 | 9,571  | 12    | 1059.12 | 847.57  | 1401.42 | 1      |        |    |
|                               |                    | 1999  | 7,092    | 6,578 | 7,936  | 11    | 1058.89 | 982.19  | 1184.84 | 1      |        |    |
|                               |                    | 2000  | 8,343    | 7,466 | 9,546  | 11    | 1275.34 | 1141.28 | 1459.21 | 1      |        |    |
|                               |                    | 2001  | 8,781    | 8,362 | 9,433  | 11    | 1364.66 | 1299.60 | 1465.97 | 1      |        |    |
|                               |                    | 2002  | 9,250    | 8,457 | 9,975  | 9     | 1463.58 | 1338.00 | 1578.26 | 1      |        |    |
|                               |                    | 2003  | 9,527    | 7,618 | 10,412 | 9     | 1536.45 | 1228.67 | 1679.26 | 1      |        |    |
|                               |                    | 2004  | 9,501    | 6,784 | 10,719 | 9     | 1555.32 | 1110.48 | 1754.71 | 1      |        |    |
|                               |                    | 2005  | 9,183    | 5,913 | 10,892 | 9     | 1519.48 | 978.34  | 1802.21 | 1      |        |    |
|                               |                    | 2006  | 8,684    | 4,965 | 10,861 | 11    | 1451.70 | 829.95  | 1815.64 | 1      |        |    |
|                               |                    | 2007  | 7,991    | 4,015 | 10,585 | 12    | 1349.87 | 678.15  | 1787.92 | 2      |        |    |
|                               |                    |       | Hispanic | 1992  | 3,739  | 2,843 | 4,647   | 21      | 221.38  | 168.30 | 275.11 | 26 |
|                               |                    |       |          | 1993  | 4,145  | 3,029 | 5,547   | 19      | 239.57  | 175.04 | 320.62 | 24 |
|                               |                    |       |          | 1994  | 3,539  | 3,160 | 4,142   | 23      | 200.17  | 178.73 | 234.28 | 26 |
|                               |                    |       |          | 1995  | 3,851  | 3,037 | 5,323   | 18      | 213.57  | 168.45 | 295.19 | 25 |
| 1996                          | 3,690              |       |          | 2,853 | 5,110  | 18    | 199.52  | 154.26  | 276.34  | 23     |        |    |
| 1997                          | 3,557              |       |          | 2,779 | 4,885  | 19    | 186.02  | 145.35  | 255.44  | 23     |        |    |
| 1998                          | 3,485              |       |          | 2,789 | 4,611  | 20    | 176.98  | 141.63  | 234.18  | 22     |        |    |
| 1999                          | 3,112              |       |          | 2,887 | 3,482  | 25    | 154.92  | 143.70  | 173.35  | 25     |        |    |
| 2000                          | 3,348              |       |          | 2,996 | 3,831  | 21    | 162.88  | 145.76  | 186.36  | 21     |        |    |
| 2001                          | 3,258              |       |          | 3,103 | 3,500  | 21    | 157.95  | 150.42  | 169.68  | 22     |        |    |
| 2002                          | 3,229              |       |          | 2,952 | 3,482  | 21    | 157.14  | 143.65  | 169.45  | 20     |        |    |
| 2003                          | 3,204              |       |          | 2,562 | 3,502  | 22    | 156.10  | 124.83  | 170.61  | 20     |        |    |
| 2004                          | 3,174              |       |          | 2,266 | 3,580  | 23    | 154.19  | 110.09  | 173.95  | 21     |        |    |
| 2005                          | 3,161              |       |          | 2,035 | 3,749  | 24    | 152.06  | 97.91   | 180.36  | 22     |        |    |
| 2006                          | 3,217              |       |          | 1,839 | 4,024  | 23    | 153.15  | 87.56   | 191.55  | 22     |        |    |
| 2007                          | 3,350              | 1,683 | 4,437    | 23    | 156.60 | 78.67 | 207.42  | 23      |         |        |        |    |

| Metropolitan Statistical Area | PWID Population | Year   | Number | Min    | Max    | Rank   | Rate   | Min    | Max    | Rank   |   |
|-------------------------------|-----------------|--------|--------|--------|--------|--------|--------|--------|--------|--------|---|
| San Francisco, CA             | Male            | 1992   | 20,476 | 15,566 | 25,446 | 6      | 349.21 | 265.47 | 433.96 | 5      |   |
|                               |                 | 1993   | 22,070 | 16,126 | 29,537 | 6      | 374.07 | 273.31 | 500.62 | 3      |   |
|                               |                 | 1994   | 18,685 | 16,683 | 21,869 | 8      | 316.20 | 282.33 | 370.08 | 4      |   |
|                               |                 | 1995   | 20,485 | 16,157 | 28,313 | 8      | 344.88 | 272.02 | 476.68 | 3      |   |
|                               |                 | 1996   | 20,029 | 15,486 | 27,741 | 8      | 334.11 | 258.33 | 462.76 | 3      |   |
|                               |                 | 1997   | 19,894 | 15,544 | 27,318 | 8      | 325.18 | 254.08 | 446.53 | 3      |   |
|                               |                 | 1998   | 20,200 | 16,165 | 26,729 | 8      | 324.76 | 259.89 | 429.72 | 3      |   |
|                               |                 | 1999   | 18,750 | 17,392 | 20,980 | 9      | 298.44 | 276.83 | 333.94 | 6      |   |
|                               |                 | 2000   | 20,954 | 18,752 | 23,975 | 8      | 330.67 | 295.91 | 378.35 | 4      |   |
|                               |                 | 2001   | 21,093 | 20,088 | 22,659 | 9      | 331.36 | 315.56 | 355.96 | 2      |   |
|                               |                 | 2002   | 21,458 | 19,616 | 23,139 | 7      | 340.26 | 311.06 | 366.92 | 3      |   |
|                               |                 | 2003   | 21,604 | 17,276 | 23,612 | 7      | 345.43 | 276.23 | 377.54 | 3      |   |
|                               |                 | 2004   | 21,376 | 15,262 | 24,116 | 7      | 343.30 | 245.12 | 387.32 | 3      |   |
|                               |                 | 2005   | 20,853 | 13,426 | 24,733 | 8      | 333.70 | 214.86 | 395.79 | 4      |   |
|                               |                 | 2006   | 20,293 | 11,602 | 25,381 | 9      | 322.77 | 184.53 | 403.69 | 4      |   |
|                               | 2007            | 19,640 | 9,867  | 26,014 | 9      | 309.30 | 155.39 | 409.67 | 4      |        |   |
|                               |                 | Female | 1992   | 10,133 | 7,703  | 12,592 | 9      | 181.07 | 137.65 | 225.01 | 4 |
|                               |                 |        | 1993   | 10,977 | 8,020  | 14,690 | 8      | 195.24 | 142.65 | 261.29 | 3 |
|                               |                 |        | 1994   | 9,239  | 8,249  | 10,813 | 12     | 163.74 | 146.20 | 191.64 | 6 |
|                               |                 |        | 1995   | 9,980  | 7,872  | 13,795 | 9      | 176.27 | 139.03 | 243.64 | 4 |
|                               |                 |        | 1996   | 9,549  | 7,383  | 13,226 | 11     | 167.13 | 129.22 | 231.48 | 5 |
|                               |                 |        | 1997   | 9,235  | 7,216  | 12,681 | 15     | 158.42 | 123.78 | 217.54 | 6 |
|                               |                 |        | 1998   | 9,102  | 7,284  | 12,043 | 15     | 153.83 | 123.11 | 203.55 | 6 |
|                               |                 |        | 1999   | 8,190  | 7,597  | 9,164  | 16     | 137.42 | 127.47 | 153.77 | 8 |
|                               |                 |        | 2000   | 8,879  | 7,946  | 10,159 | 15     | 148.11 | 132.54 | 169.46 | 7 |
|                               | 2001            |        | 8,693  | 8,278  | 9,338  | 15     | 144.56 | 137.67 | 155.30 | 8      |   |
|                               | 2002            | 8,640  | 7,899  | 9,317  | 14     | 145.15 | 132.70 | 156.52 | 7      |        |   |
|                               | 2003            | 8,555  | 6,841  | 9,350  | 14     | 144.97 | 115.93 | 158.45 | 7      |        |   |
|                               | 2004            | 8,397  | 5,996  | 9,474  | 14     | 143.14 | 102.20 | 161.49 | 7      |        |   |
|                               | 2005            | 8,214  | 5,289  | 9,743  | 14     | 140.04 | 90.17  | 166.10 | 7      |        |   |
|                               | 2006            | 8,120  | 4,642  | 10,156 | 14     | 137.66 | 78.70  | 172.17 | 7      |        |   |
|                               | 2007            | 8,104  | 4,072  | 10,734 | 14     | 136.25 | 68.45  | 180.46 | 7      |        |   |

| Metropolitan Statistical Area | PWID Population | Year        | Number | Min    | Max    | Rank   | Rate   | Min    | Max    | Rank   |   |
|-------------------------------|-----------------|-------------|--------|--------|--------|--------|--------|--------|--------|--------|---|
| San Francisco, CA             | Young (15-29)   | 1992        | 6,957  | 5,289  | 8,646  | 15     | 197.95 | 150.49 | 246.00 | 11     |   |
|                               |                 | 1993        | 8,210  | 5,999  | 10,988 | 8      | 237.02 | 173.18 | 317.20 | 3      |   |
|                               |                 | 1994        | 7,287  | 6,506  | 8,529  | 8      | 214.17 | 191.23 | 250.66 | 4      |   |
|                               |                 | 1995        | 8,086  | 6,378  | 11,176 | 7      | 239.26 | 188.72 | 330.70 | 1      |   |
|                               |                 | 1996        | 7,781  | 6,016  | 10,777 | 7      | 230.34 | 178.10 | 319.04 | 1      |   |
|                               |                 | 1997        | 7,441  | 5,814  | 10,218 | 7      | 217.20 | 169.71 | 298.25 | 1      |   |
|                               |                 | 1998        | 7,158  | 5,728  | 9,471  | 9      | 206.57 | 165.31 | 273.34 | 3      |   |
|                               |                 | 1999        | 6,230  | 5,779  | 6,971  | 13     | 178.80 | 165.85 | 200.07 | 12     |   |
|                               |                 | 2000        | 6,502  | 5,818  | 7,439  | 13     | 185.58 | 166.08 | 212.34 | 9      |   |
|                               |                 | 2001        | 6,128  | 5,835  | 6,583  | 17     | 181.52 | 172.87 | 195.00 | 13     |   |
|                               |                 | 2002        | 5,893  | 5,387  | 6,355  | 16     | 184.80 | 168.94 | 199.28 | 13     |   |
|                               |                 | 2003        | 5,706  | 4,563  | 6,236  | 20     | 187.73 | 150.12 | 205.17 | 13     |   |
|                               |                 | 2004        | 5,564  | 3,973  | 6,277  | 21     | 189.77 | 135.49 | 214.10 | 14     |   |
|                               |                 | 2005        | 5,523  | 3,556  | 6,550  | 20     | 192.29 | 123.81 | 228.07 | 15     |   |
|                               | 2006            | 5,683       | 3,249  | 7,107  | 19     | 199.22 | 113.90 | 249.16 | 14     |        |   |
|                               | 2007            | 6,076       | 3,052  | 8,048  | 19     | 211.67 | 106.34 | 280.36 | 8      |        |   |
|                               |                 | Old (30-64) | 1992   | 24,170 | 18,374 | 30,036 | 6      | 304.20 | 231.25 | 378.03 | 3 |
|                               |                 |             | 1993   | 25,177 | 18,396 | 33,695 | 8      | 312.44 | 228.28 | 418.14 | 3 |
|                               |                 |             | 1994   | 20,797 | 18,569 | 24,340 | 9      | 255.20 | 227.87 | 298.69 | 7 |
|                               |                 |             | 1995   | 22,473 | 17,726 | 31,061 | 8      | 273.33 | 215.59 | 377.79 | 4 |
|                               |                 |             | 1996   | 21,858 | 16,900 | 30,274 | 11     | 262.39 | 202.87 | 363.42 | 5 |
| 1997                          |                 |             | 21,752 | 16,996 | 29,870 | 11     | 255.27 | 199.45 | 350.53 | 6      |   |
| 1998                          |                 |             | 22,236 | 17,795 | 29,423 | 11     | 256.42 | 205.21 | 339.30 | 5      |   |
| 1999                          |                 |             | 20,831 | 19,322 | 23,309 | 9      | 237.85 | 220.62 | 266.14 | 7      |   |
| 2000                          |                 |             | 23,510 | 21,039 | 26,900 | 9      | 266.30 | 238.31 | 304.69 | 5      |   |
| 2001                          |                 |             | 23,881 | 22,742 | 25,653 | 9      | 265.25 | 252.60 | 284.94 | 5      |   |
| 2002                          |                 |             | 24,470 | 22,370 | 26,387 | 6      | 269.80 | 246.65 | 290.94 | 5      |   |
| 2003                          |                 |             | 24,755 | 19,796 | 27,056 | 6      | 271.56 | 217.16 | 296.80 | 5      |   |
| 2004                          |                 |             | 24,534 | 17,517 | 27,680 | 6      | 267.81 | 191.22 | 302.15 | 5      |   |
| 2005                          |                 |             | 23,871 | 15,370 | 28,313 | 6      | 258.27 | 166.29 | 306.33 | 5      |   |
| 2006                          | 23,027          | 13,164      | 28,799 | 7      | 246.71 | 141.04 | 308.56 | 5      |        |        |   |
| 2007                          | 21,872          | 10,988      | 28,970 | 7      | 231.99 | 116.55 | 307.28 | 5      |        |        |   |



| Metropolitan Statistical Area | PWID Population | Year  | Number             | Min    | Max    | Rank  | Rate   | Min    | Max    | Rank   |        |    |
|-------------------------------|-----------------|-------|--------------------|--------|--------|-------|--------|--------|--------|--------|--------|----|
| San Jose, CA                  | Total           | 1992  | 16,949             | 11,477 | 22,181 | 28    | 158.83 | 107.55 | 207.86 | 28     |        |    |
|                               |                 | 1993  | 14,335             | 10,724 | 19,568 | 30    | 133.71 | 100.02 | 182.52 | 35     |        |    |
|                               |                 | 1994  | 14,062             | 10,894 | 16,961 | 33    | 130.84 | 101.36 | 157.82 | 39     |        |    |
|                               |                 | 1995  | 11,628             | 8,520  | 14,510 | 34    | 107.29 | 78.62  | 133.88 | 47     |        |    |
|                               |                 | 1996  | 10,631             | 7,555  | 12,938 | 38    | 96.55  | 68.62  | 117.51 | 50     |        |    |
|                               |                 | 1997  | 9,615              | 6,673  | 12,098 | 43    | 85.36  | 59.24  | 107.40 | 58     |        |    |
|                               |                 | 1998  | 8,620              | 5,910  | 11,596 | 45    | 75.10  | 51.49  | 101.04 | 67     |        |    |
|                               |                 | 1999  | 8,398              | 4,661  | 11,161 | 50    | 72.38  | 40.17  | 96.19  | 71     |        |    |
|                               |                 | 2000  | 7,169              | 3,513  | 11,014 | 55    | 61.10  | 29.94  | 93.86  | 74     |        |    |
|                               |                 | 2001  | 7,359              | 3,685  | 10,612 | 59    | 62.51  | 31.31  | 90.15  | 77     |        |    |
|                               |                 | 2002  | 6,657              | 4,211  | 9,873  | 59    | 57.24  | 36.21  | 84.90  | 80     |        |    |
|                               |                 | 2003  | 6,551              | 4,755  | 9,557  | 61    | 56.66  | 41.13  | 82.67  | 81     |        |    |
|                               |                 | 2004  | 6,465              | 4,983  | 9,482  | 61    | 56.00  | 43.16  | 82.12  | 83     |        |    |
|                               |                 | 2005  | 6,420              | 5,004  | 9,617  | 66    | 55.16  | 42.99  | 82.63  | 85     |        |    |
|                               |                 | 2006  | 6,399              | 4,702  | 9,843  | 67    | 54.39  | 39.96  | 83.66  | 92     |        |    |
|                               |                 | 2007  | 6,381              | 4,258  | 10,146 | 68    | 53.53  | 35.72  | 85.12  | 90     |        |    |
|                               |                 |       | Non-Hispanic White | 1992   | 9,334  | 6,320 | 12,215 | 24     | 156.27 | 105.82 | 204.52 | 17 |
|                               |                 |       |                    | 1993   | 7,914  | 5,921 | 10,803 | 26     | 135.82 | 101.60 | 185.40 | 24 |
|                               |                 |       |                    | 1994   | 7,701  | 5,966 | 9,289  | 28     | 135.64 | 105.08 | 163.61 | 21 |
|                               |                 |       |                    | 1995   | 6,260  | 4,587 | 7,812  | 32     | 112.32 | 82.30  | 140.16 | 28 |
| 1996                          | 5,582           |       |                    | 3,967  | 6,793  | 35    | 101.10 | 71.85  | 123.05 | 32     |        |    |
| 1997                          | 4,889           |       |                    | 3,393  | 6,151  | 38    | 88.58  | 61.47  | 111.44 | 43     |        |    |
| 1998                          | 4,217           |       |                    | 2,892  | 5,674  | 47    | 76.66  | 52.56  | 103.13 | 51     |        |    |
| 1999                          | 3,935           |       |                    | 2,184  | 5,229  | 54    | 72.39  | 40.18  | 96.21  | 56     |        |    |
| 2000                          | 3,205           |       |                    | 1,570  | 4,923  | 64    | 59.64  | 29.23  | 91.63  | 63     |        |    |
| 2001                          | 3,132           |       |                    | 1,569  | 4,517  | 72    | 59.55  | 29.82  | 85.87  | 66     |        |    |
| 2002                          | 2,698           |       |                    | 1,706  | 4,001  | 75    | 52.96  | 33.50  | 78.55  | 69     |        |    |
| 2003                          | 2,533           |       |                    | 1,839  | 3,696  | 78    | 51.06  | 37.06  | 74.49  | 72     |        |    |
| 2004                          | 2,398           |       |                    | 1,848  | 3,517  | 81    | 49.34  | 38.03  | 72.36  | 73     |        |    |
| 2005                          | 2,301           |       |                    | 1,793  | 3,446  | 82    | 47.89  | 37.33  | 71.74  | 79     |        |    |
| 2006                          | 2,239           |       |                    | 1,645  | 3,443  | 84    | 47.03  | 34.55  | 72.34  | 83     |        |    |
| 2007                          | 2,207           | 1,473 | 3,509              | 84     | 46.62  | 31.11 | 74.13  | 85     |        |        |        |    |

| Metropolitan Statistical Area | PWID Population    | Year  | Number   | Min   | Max   | Rank  | Rate   | Min    | Max    | Rank   |        |    |
|-------------------------------|--------------------|-------|----------|-------|-------|-------|--------|--------|--------|--------|--------|----|
| San Jose, CA                  | Non-Hispanic Black | 1992  | 1,768    | 1,197 | 2,314 | 63    | 471.33 | 319.17 | 616.84 | 20     |        |    |
|                               |                    | 1993  | 1,508    | 1,128 | 2,059 | 61    | 406.87 | 304.37 | 555.40 | 21     |        |    |
|                               |                    | 1994  | 1,476    | 1,144 | 1,781 | 62    | 404.88 | 313.66 | 488.37 | 22     |        |    |
|                               |                    | 1995  | 1,207    | 884   | 1,506 | 65    | 333.48 | 244.36 | 416.14 | 26     |        |    |
|                               |                    | 1996  | 1,083    | 769   | 1,318 | 65    | 300.09 | 213.27 | 365.23 | 31     |        |    |
|                               |                    | 1997  | 955      | 663   | 1,202 | 67    | 263.76 | 183.04 | 331.85 | 35     |        |    |
|                               |                    | 1998  | 832      | 571   | 1,120 | 71    | 230.30 | 157.91 | 309.84 | 41     |        |    |
|                               |                    | 1999  | 786      | 436   | 1,045 | 72    | 219.68 | 121.94 | 291.98 | 42     |        |    |
|                               |                    | 2000  | 651      | 319   | 1,000 | 78    | 184.34 | 90.33  | 283.20 | 48     |        |    |
|                               |                    | 2001  | 649      | 325   | 935   | 79    | 185.80 | 93.06  | 267.94 | 49     |        |    |
|                               |                    | 2002  | 572      | 362   | 848   | 78    | 166.93 | 105.59 | 247.57 | 49     |        |    |
|                               |                    | 2003  | 551      | 400   | 804   | 79    | 162.72 | 118.10 | 237.39 | 49     |        |    |
|                               |                    | 2004  | 537      | 414   | 787   | 81    | 159.49 | 122.93 | 233.89 | 46     |        |    |
|                               |                    | 2005  | 531      | 414   | 796   | 81    | 156.81 | 122.23 | 234.92 | 47     |        |    |
|                               |                    | 2006  | 535      | 393   | 823   | 81    | 156.50 | 114.98 | 240.70 | 48     |        |    |
|                               |                    | 2007  | 549      | 366   | 873   | 81    | 158.26 | 105.60 | 251.61 | 48     |        |    |
|                               |                    |       | Hispanic | 1992  | 5,097 | 3,452 | 6,671  | 14     | 231.51 | 156.77 | 302.98 | 25 |
|                               |                    |       |          | 1993  | 4,088 | 3,058 | 5,581  | 20     | 180.97 | 135.38 | 247.03 | 35 |
|                               |                    |       |          | 1994  | 3,871 | 2,999 | 4,669  | 20     | 167.57 | 129.82 | 202.13 | 32 |
|                               |                    |       |          | 1995  | 3,140 | 2,301 | 3,919  | 25     | 132.91 | 97.39  | 165.85 | 41 |
| 1996                          | 2,857              |       |          | 2,031 | 3,478 | 28    | 117.34 | 83.39  | 142.81 | 40     |        |    |
| 1997                          | 2,604              |       |          | 1,807 | 3,276 | 29    | 103.42 | 71.77  | 130.11 | 44     |        |    |
| 1998                          | 2,376              |       |          | 1,629 | 3,196 | 31    | 91.59  | 62.80  | 123.22 | 49     |        |    |
| 1999                          | 2,374              |       |          | 1,318 | 3,155 | 31    | 89.79  | 49.84  | 119.34 | 48     |        |    |
| 2000                          | 2,090              |       |          | 1,024 | 3,212 | 33    | 77.30  | 37.88  | 118.76 | 52     |        |    |
| 2001                          | 2,221              |       |          | 1,112 | 3,203 | 33    | 82.08  | 41.11  | 118.36 | 51     |        |    |
| 2002                          | 2,083              |       |          | 1,317 | 3,089 | 34    | 77.60  | 49.08  | 115.08 | 49     |        |    |
| 2003                          | 2,124              |       |          | 1,542 | 3,099 | 34    | 78.24  | 56.79  | 114.15 | 49     |        |    |
| 2004                          | 2,169              |       |          | 1,672 | 3,180 | 33    | 78.68  | 60.64  | 115.39 | 47     |        |    |
| 2005                          | 2,220              |       |          | 1,730 | 3,326 | 33    | 78.72  | 61.36  | 117.93 | 47     |        |    |
| 2006                          | 2,271              |       |          | 1,668 | 3,493 | 31    | 78.52  | 57.69  | 120.78 | 48     |        |    |
| 2007                          | 2,310              | 1,541 | 3,672    | 31    | 77.95 | 52.01 | 123.93 | 48     |        |        |        |    |

| Metropolitan Statistical Area | PWID Population | Year   | Number | Min   | Max    | Rank  | Rate   | Min    | Max    | Rank   |    |
|-------------------------------|-----------------|--------|--------|-------|--------|-------|--------|--------|--------|--------|----|
| San Jose, CA                  | Male            | 1992   | 11,313 | 7,661 | 14,805 | 28    | 204.49 | 138.47 | 267.62 | 32     |    |
|                               |                 | 1993   | 9,432  | 7,056 | 12,875 | 32    | 169.71 | 126.96 | 231.66 | 37     |    |
|                               |                 | 1994   | 9,132  | 7,074 | 11,015 | 34    | 164.13 | 127.15 | 197.97 | 40     |    |
|                               |                 | 1995   | 7,463  | 5,469 | 9,313  | 36    | 133.05 | 97.49  | 166.03 | 47     |    |
|                               |                 | 1996   | 6,753  | 4,800 | 8,219  | 39    | 118.63 | 84.31  | 144.38 | 52     |    |
|                               |                 | 1997   | 6,055  | 4,202 | 7,618  | 42    | 104.08 | 72.23  | 130.95 | 62     |    |
|                               |                 | 1998   | 5,389  | 3,695 | 7,250  | 44    | 90.97  | 62.37  | 122.38 | 69     |    |
|                               |                 | 1999   | 5,221  | 2,898 | 6,940  | 51    | 87.15  | 48.37  | 115.83 | 75     |    |
|                               |                 | 2000   | 4,440  | 2,176 | 6,822  | 56    | 73.20  | 35.87  | 112.45 | 80     |    |
|                               |                 | 2001   | 4,548  | 2,278 | 6,558  | 59    | 74.60  | 37.36  | 107.58 | 83     |    |
|                               |                 | 2002   | 4,112  | 2,601 | 6,099  | 62    | 68.15  | 43.11  | 101.07 | 84     |    |
|                               |                 | 2003   | 4,052  | 2,941 | 5,911  | 62    | 67.46  | 48.96  | 98.41  | 86     |    |
|                               |                 | 2004   | 4,010  | 3,091 | 5,881  | 61    | 66.73  | 51.43  | 97.86  | 88     |    |
|                               |                 | 2005   | 4,000  | 3,118 | 5,992  | 60    | 65.87  | 51.34  | 98.68  | 92     |    |
|                               |                 | 2006   | 4,011  | 2,947 | 6,170  | 65    | 65.26  | 47.94  | 100.37 | 92     |    |
|                               | 2007            | 4,030  | 2,689  | 6,408 | 64     | 64.62 | 43.12  | 102.74 | 92     |        |    |
|                               |                 | Female | 1992   | 5,739 | 3,886  | 7,511 | 28     | 111.68 | 75.62  | 146.15 | 25 |
|                               |                 |        | 1993   | 4,982 | 3,727  | 6,801 | 27     | 96.49  | 72.18  | 131.71 | 31 |
|                               |                 |        | 1994   | 5,008 | 3,879  | 6,040 | 32     | 96.61  | 74.84  | 116.53 | 34 |
|                               |                 |        | 1995   | 4,235 | 3,103  | 5,284 | 33     | 81.00  | 59.35  | 101.07 | 40 |
|                               |                 |        | 1996   | 3,951 | 2,808  | 4,809 | 36     | 74.30  | 52.80  | 90.43  | 48 |
|                               |                 |        | 1997   | 3,638 | 2,525  | 4,577 | 38     | 66.79  | 46.35  | 84.04  | 55 |
|                               |                 |        | 1998   | 3,311 | 2,270  | 4,455 | 42     | 59.63  | 40.88  | 80.22  | 58 |
|                               |                 |        | 1999   | 3,265 | 1,812  | 4,340 | 47     | 58.19  | 32.30  | 77.34  | 63 |
|                               |                 |        | 2000   | 2,813 | 1,378  | 4,321 | 51     | 49.63  | 24.32  | 76.25  | 71 |
|                               | 2001            |        | 2,903  | 1,454 | 4,186  | 57    | 51.15  | 25.62  | 73.77  | 74     |    |
|                               | 2002            | 2,631  | 1,664  | 3,902 | 57     | 47.02 | 29.74  | 69.73  | 77     |        |    |
|                               | 2003            | 2,583  | 1,875  | 3,768 | 59     | 46.49 | 33.74  | 67.83  | 76     |        |    |
|                               | 2004            | 2,532  | 1,951  | 3,713 | 62     | 45.73 | 35.25  | 67.06  | 80     |        |    |
|                               | 2005            | 2,485  | 1,937  | 3,723 | 64     | 44.64 | 34.79  | 66.87  | 80     |        |    |
|                               | 2006            | 2,436  | 1,790  | 3,747 | 65     | 43.35 | 31.85  | 66.68  | 83     |        |    |
|                               | 2007            | 2,375  | 1,585  | 3,777 | 64     | 41.80 | 27.89  | 66.45  | 83     |        |    |

| Metropolitan Statistical Area | PWID Population | Year  | Number      | Min   | Max    | Rank  | Rate   | Min   | Max    | Rank   |        |    |
|-------------------------------|-----------------|-------|-------------|-------|--------|-------|--------|-------|--------|--------|--------|----|
| San Jose, CA                  | Young (15-29)   | 1992  | 4,273       | 2,894 | 5,592  | 26    | 116.22 | 78.70 | 152.09 | 31     |        |    |
|                               |                 | 1993  | 3,856       | 2,884 | 5,263  | 26    | 106.81 | 79.91 | 145.81 | 33     |        |    |
|                               |                 | 1994  | 3,912       | 3,031 | 4,719  | 26    | 110.60 | 85.68 | 133.41 | 32     |        |    |
|                               |                 | 1995  | 3,264       | 2,392 | 4,073  | 29    | 92.88  | 68.06 | 115.90 | 47     |        |    |
|                               |                 | 1996  | 2,951       | 2,097 | 3,592  | 34    | 83.68  | 59.47 | 101.85 | 52     |        |    |
|                               |                 | 1997  | 2,598       | 1,803 | 3,269  | 38    | 72.68  | 50.44 | 91.44  | 59     |        |    |
|                               |                 | 1998  | 2,242       | 1,537 | 3,016  | 49    | 62.00  | 42.51 | 83.41  | 64     |        |    |
|                               |                 | 1999  | 2,087       | 1,158 | 2,774  | 57    | 57.47  | 31.90 | 76.38  | 77     |        |    |
|                               |                 | 2000  | 1,699       | 833   | 2,610  | 67    | 46.43  | 22.75 | 71.34  | 83     |        |    |
|                               |                 | 2001  | 1,667       | 835   | 2,404  | 76    | 46.82  | 23.45 | 67.51  | 88     |        |    |
|                               |                 | 2002  | 1,454       | 920   | 2,156  | 80    | 42.95  | 27.17 | 63.70  | 95     |        |    |
|                               |                 | 2003  | 1,398       | 1,015 | 2,039  | 85    | 42.76  | 31.04 | 62.39  | 99     |        |    |
|                               |                 | 2004  | 1,374       | 1,059 | 2,015  | 87    | 42.98  | 33.13 | 63.04  | 100    |        |    |
|                               |                 | 2005  | 1,393       | 1,086 | 2,087  | 89    | 43.71  | 34.07 | 65.49  | 100    |        |    |
|                               |                 | 2006  | 1,459       | 1,072 | 2,244  | 83    | 45.35  | 33.32 | 69.75  | 100    |        |    |
|                               |                 | 2007  | 1,579       | 1,054 | 2,511  | 82    | 48.37  | 32.27 | 76.90  | 97     |        |    |
|                               |                 |       | Old (30-64) | 1992  | 12,841 | 8,695 | 16,805 | 26    | 183.59 | 124.32 | 240.26 | 28 |
|                               |                 |       |             | 1993  | 10,580 | 7,914 | 14,442 | 29    | 148.76 | 111.28 | 203.06 | 34 |
|                               |                 |       |             | 1994  | 10,237 | 7,931 | 12,348 | 36    | 141.99 | 110.00 | 171.26 | 41 |
|                               |                 |       |             | 1995  | 8,448  | 6,190 | 10,542 | 39    | 115.36 | 84.53  | 143.96 | 45 |
| 1996                          | 7,781           |       |             | 5,530 | 9,470  | 40    | 103.97 | 73.89 | 126.54 | 52     |        |    |
| 1997                          | 7,136           |       |             | 4,952 | 8,978  | 42    | 92.81  | 64.41 | 116.77 | 59     |        |    |
| 1998                          | 6,508           |       |             | 4,462 | 8,756  | 44    | 82.79  | 56.76 | 111.38 | 62     |        |    |
| 1999                          | 6,455           |       |             | 3,583 | 8,580  | 47    | 80.98  | 44.95 | 107.63 | 67     |        |    |
| 2000                          | 5,602           |       |             | 2,745 | 8,606  | 51    | 69.37  | 33.99 | 106.57 | 69     |        |    |
| 2001                          | 5,826           |       |             | 2,918 | 8,401  | 52    | 70.96  | 35.54 | 102.32 | 74     |        |    |
| 2002                          | 5,316           |       |             | 3,362 | 7,884  | 53    | 64.47  | 40.78 | 95.62  | 69     |        |    |
| 2003                          | 5,245           |       |             | 3,807 | 7,653  | 52    | 63.26  | 45.91 | 92.29  | 69     |        |    |
| 2004                          | 5,153           |       |             | 3,972 | 7,558  | 52    | 61.72  | 47.58 | 90.52  | 73     |        |    |
| 2005                          | 5,045           |       |             | 3,932 | 7,557  | 51    | 59.68  | 46.52 | 89.41  | 73     |        |    |
| 2006                          | 4,890           |       |             | 3,593 | 7,521  | 53    | 57.21  | 42.03 | 87.99  | 72     |        |    |
| 2007                          | 4,646           | 3,100 | 7,387       | 54    | 53.69  | 35.82 | 85.35  | 72    |        |        |        |    |

| Metropolitan Statistical Area | PWID Population | Year  | Number   | Min    | Max    | Rank   | Rate   | Min    | Max    | Rank   |        |    |
|-------------------------------|-----------------|-------|----------|--------|--------|--------|--------|--------|--------|--------|--------|----|
| San Juan-Caguas-Arecibo, PR   | Total           | 1992  | 17,064   | 13,926 | 22,393 | 27     | 142.49 | 116.29 | 186.99 | 36     |        |    |
|                               |                 | 1993  | 15,625   | 10,783 | 21,760 | 28     | 129.30 | 89.23  | 180.06 | 38     |        |    |
|                               |                 | 1994  | 17,398   | 15,171 | 21,115 | 24     | 142.68 | 124.41 | 173.16 | 34     |        |    |
|                               |                 | 1995  | 16,028   | 11,876 | 20,482 | 27     | 130.27 | 96.52  | 166.47 | 35     |        |    |
|                               |                 | 1996  | 16,038   | 12,321 | 19,867 | 27     | 129.20 | 99.26  | 160.05 | 35     |        |    |
|                               |                 | 1997  | 16,016   | 12,674 | 19,269 | 26     | 127.90 | 101.21 | 153.87 | 35     |        |    |
|                               |                 | 1998  | 16,010   | 13,031 | 18,687 | 26     | 126.74 | 103.16 | 147.93 | 35     |        |    |
|                               |                 | 1999  | 16,851   | 13,783 | 18,648 | 23     | 132.25 | 108.17 | 146.36 | 31     |        |    |
|                               |                 | 2000  | 15,957   | 13,084 | 19,303 | 24     | 124.17 | 101.81 | 150.21 | 34     |        |    |
|                               |                 | 2001  | 16,414   | 12,237 | 19,966 | 23     | 126.64 | 94.42  | 154.05 | 32     |        |    |
|                               |                 | 2002  | 15,346   | 11,487 | 20,581 | 25     | 117.42 | 87.89  | 157.47 | 34     |        |    |
|                               |                 | 2003  | 15,127   | 11,044 | 21,203 | 26     | 114.78 | 83.80  | 160.88 | 34     |        |    |
|                               |                 | 2004  | 14,909   | 10,694 | 21,805 | 26     | 112.19 | 80.47  | 164.08 | 34     |        |    |
|                               |                 | 2005  | 14,630   | 10,149 | 22,414 | 28     | 109.19 | 75.75  | 167.29 | 35     |        |    |
|                               |                 | 2006  | 14,284   | 9,352  | 23,011 | 28     | 105.74 | 69.23  | 170.35 | 36     |        |    |
|                               |                 | 2007  | 13,910   | 8,493  | 23,614 | 29     | 102.15 | 62.37  | 173.41 | 39     |        |    |
|                               |                 |       | Hispanic | 1992   | 17,064 | 13,926 | 22,393 | 3      | 159.90 | 130.50 | 209.84 | 41 |
|                               |                 |       |          | 1993   | 15,625 | 10,783 | 21,760 | 3      | 145.74 | 100.57 | 202.96 | 40 |
|                               |                 |       |          | 1994   | 17,398 | 15,171 | 21,115 | 3      | 161.89 | 141.16 | 196.47 | 35 |
|                               |                 |       |          | 1995   | 16,028 | 11,876 | 20,482 | 3      | 147.89 | 109.58 | 189.00 | 35 |
| 1996                          | 16,038          |       |          | 12,321 | 19,867 | 3      | 145.66 | 111.90 | 180.43 | 36     |        |    |
| 1997                          | 16,016          |       |          | 12,674 | 19,269 | 3      | 142.19 | 112.51 | 171.06 | 34     |        |    |
| 1998                          | 16,010          |       |          | 13,031 | 18,687 | 3      | 139.49 | 113.54 | 162.82 | 34     |        |    |
| 1999                          | 16,851          |       |          | 13,783 | 18,648 | 3      | 145.23 | 118.79 | 160.72 | 29     |        |    |
| 2000                          | 15,957          |       |          | 13,084 | 19,303 | 3      | 135.90 | 111.43 | 164.40 | 28     |        |    |
| 2001                          | 16,414          |       |          | 12,237 | 19,966 | 3      | 139.85 | 104.27 | 170.12 | 26     |        |    |
| 2002                          | 15,346          |       |          | 11,487 | 20,581 | 3      | 132.37 | 99.08  | 177.52 | 26     |        |    |
| 2003                          | 15,127          |       |          | 11,044 | 21,203 | 3      | 131.11 | 95.72  | 183.77 | 27     |        |    |
| 2004                          | 14,909          |       |          | 10,694 | 21,805 | 3      | 129.21 | 92.68  | 188.97 | 24     |        |    |
| 2005                          | 14,630          |       |          | 10,149 | 22,414 | 3      | 122.64 | 85.08  | 187.90 | 26     |        |    |
| 2006                          | 14,284          | 9,352 | 23,011   | 3      | 118.76 | 77.75  | 191.31 | 27     |        |        |        |    |
| 2007                          | 13,910          | 8,493 | 23,614   | 3      | 114.70 | 70.04  | 194.72 | 29     |        |        |        |    |

| Metropolitan Statistical Area | PWID Population | Year  | Number             | Min   | Max    | Rank  | Rate   | Min    | Max    | Rank  |        |    |
|-------------------------------|-----------------|-------|--------------------|-------|--------|-------|--------|--------|--------|-------|--------|----|
| Sarasota--Bradenton, FL       | Total           | 1992  | 2,614              | 2,262 | 2,962  | 94    | 93.71  | 81.07  | 106.17 | 59    |        |    |
|                               |                 | 1993  | 2,554              | 1,618 | 3,089  | 91    | 90.46  | 57.32  | 109.43 | 54    |        |    |
|                               |                 | 1994  | 3,145              | 3,021 | 3,246  | 89    | 109.31 | 104.99 | 112.83 | 47    |        |    |
|                               |                 | 1995  | 3,013              | 1,703 | 3,663  | 88    | 102.45 | 57.90  | 124.56 | 49    |        |    |
|                               |                 | 1996  | 3,253              | 1,738 | 4,132  | 85    | 108.70 | 58.07  | 138.10 | 45    |        |    |
|                               |                 | 1997  | 3,530              | 1,781 | 4,654  | 85    | 115.03 | 58.04  | 151.63 | 42    |        |    |
|                               |                 | 1998  | 3,832              | 1,831 | 5,185  | 85    | 121.38 | 58.00  | 164.24 | 39    |        |    |
|                               |                 | 1999  | 4,877              | 4,435 | 5,737  | 82    | 150.35 | 136.72 | 176.85 | 22    |        |    |
|                               |                 | 2000  | 4,382              | 1,957 | 6,127  | 84    | 131.07 | 58.54  | 183.26 | 30    |        |    |
|                               |                 | 2001  | 5,487              | 4,678 | 6,519  | 78    | 159.65 | 136.12 | 189.67 | 15    |        |    |
|                               |                 | 2002  | 4,811              | 1,951 | 6,886  | 81    | 135.94 | 55.12  | 194.56 | 25    |        |    |
|                               |                 | 2003  | 5,024              | 1,940 | 7,243  | 78    | 138.34 | 53.41  | 199.45 | 20    |        |    |
|                               |                 | 2004  | 5,340              | 1,938 | 7,611  | 75    | 142.26 | 51.63  | 202.76 | 18    |        |    |
|                               |                 | 2005  | 5,768              | 1,933 | 8,026  | 73    | 148.10 | 49.64  | 206.07 | 18    |        |    |
|                               |                 | 2006  | 6,103              | 1,891 | 8,252  | 72    | 153.82 | 47.66  | 207.96 | 16    |        |    |
|                               |                 | 2007  | 6,385              | 1,817 | 8,425  | 67    | 159.88 | 45.50  | 210.98 | 11    |        |    |
|                               |                 |       | Non-Hispanic White | 1992  | 2,125  | 1,838 | 2,407  | 80     | 86.22  | 74.59 | 97.69  | 43 |
|                               |                 |       |                    | 1993  | 2,039  | 1,292 | 2,466  | 81     | 82.23  | 52.11 | 99.48  | 43 |
|                               |                 |       |                    | 1994  | 2,477  | 2,379 | 2,557  | 76     | 98.53  | 94.63 | 101.70 | 39 |
|                               |                 |       |                    | 1995  | 2,352  | 1,329 | 2,860  | 75     | 92.08  | 52.04 | 111.96 | 39 |
| 1996                          | 2,527           |       |                    | 1,350 | 3,211  | 74    | 97.85  | 52.27  | 124.30 | 35    |        |    |
| 1997                          | 2,739           |       |                    | 1,382 | 3,611  | 73    | 104.02 | 52.48  | 137.12 | 31    |        |    |
| 1998                          | 2,978           |       |                    | 1,423 | 4,030  | 71    | 110.56 | 52.83  | 149.59 | 23    |        |    |
| 1999                          | 3,805           |       |                    | 3,459 | 4,475  | 58    | 138.33 | 125.78 | 162.70 | 14    |        |    |
| 2000                          | 3,436           |       |                    | 1,535 | 4,803  | 60    | 122.02 | 54.50  | 170.61 | 18    |        |    |
| 2001                          | 4,326           |       |                    | 3,688 | 5,139  | 52    | 150.51 | 128.32 | 178.81 | 12    |        |    |
| 2002                          | 3,813           |       |                    | 1,546 | 5,458  | 55    | 129.67 | 52.58  | 185.59 | 14    |        |    |
| 2003                          | 4,000           |       |                    | 1,545 | 5,767  | 53    | 133.42 | 51.52  | 192.36 | 14    |        |    |
| 2004                          | 4,265           |       |                    | 1,548 | 6,079  | 47    | 138.41 | 50.24  | 197.28 | 12    |        |    |
| 2005                          | 4,612           |       |                    | 1,546 | 6,417  | 46    | 145.17 | 48.66  | 201.99 | 11    |        |    |
| 2006                          | 4,873           | 1,510 | 6,588              | 44    | 151.78 | 47.03 | 205.20 | 11     |        |       |        |    |
| 2007                          | 5,072           | 1,444 | 6,693              | 44    | 158.34 | 45.06 | 208.95 | 9      |        |       |        |    |

| Metropolitan Statistical Area | PWID Population    | Year | Number   | Min  | Max   | Rank  | Rate   | Min    | Max    | Rank  |       |    |
|-------------------------------|--------------------|------|----------|------|-------|-------|--------|--------|--------|-------|-------|----|
| Sarasota--Bradenton, FL       | Non-Hispanic Black | 1992 | 345      | 299  | 391   | 96    | 195.55 | 169.16 | 221.55 | 79    |       |    |
|                               |                    | 1993 | 350      | 222  | 424   | 95    | 194.17 | 123.04 | 234.90 | 68    |       |    |
|                               |                    | 1994 | 432      | 415  | 446   | 92    | 233.53 | 224.30 | 241.06 | 61    |       |    |
|                               |                    | 1995 | 403      | 228  | 490   | 93    | 211.48 | 119.52 | 257.13 | 54    |       |    |
|                               |                    | 1996 | 413      | 221  | 525   | 92    | 212.36 | 113.44 | 269.79 | 52    |       |    |
|                               |                    | 1997 | 420      | 212  | 553   | 91    | 208.95 | 105.43 | 275.45 | 49    |       |    |
|                               |                    | 1998 | 422      | 201  | 570   | 89    | 203.59 | 97.29  | 275.48 | 49    |       |    |
|                               |                    | 1999 | 495      | 450  | 582   | 88    | 232.13 | 211.08 | 273.03 | 38    |       |    |
|                               |                    | 2000 | 411      | 184  | 575   | 89    | 186.55 | 83.33  | 260.83 | 47    |       |    |
|                               |                    | 2001 | 482      | 411  | 572   | 86    | 211.22 | 180.08 | 250.94 | 32    |       |    |
|                               |                    | 2002 | 402      | 163  | 575   | 86    | 169.90 | 68.90  | 243.17 | 45    |       |    |
|                               |                    | 2003 | 410      | 158  | 591   | 87    | 167.21 | 64.56  | 241.08 | 45    |       |    |
|                               |                    | 2004 | 439      | 160  | 626   | 87    | 172.68 | 62.67  | 246.13 | 41    |       |    |
|                               |                    | 2005 | 499      | 167  | 694   | 84    | 188.72 | 63.26  | 262.58 | 37    |       |    |
|                               |                    | 2006 | 581      | 180  | 786   | 77    | 211.07 | 65.40  | 285.38 | 26    |       |    |
|                               |                    | 2007 | 706      | 201  | 932   | 77    | 249.36 | 70.97  | 329.05 | 19    |       |    |
|                               |                    |      | Hispanic | 1992 | 68    | 59    | 77     | 82     | 57.19  | 49.48 | 64.80 | 80 |
|                               |                    |      |          | 1993 | 77    | 49    | 93     | 78     | 58.43  | 37.02 | 70.68 | 74 |
|                               |                    |      |          | 1994 | 106   | 102   | 109    | 78     | 73.59  | 70.68 | 75.96 | 69 |
|                               |                    |      |          | 1995 | 110   | 62    | 134    | 76     | 69.13  | 39.07 | 84.06 | 63 |
| 1996                          | 127                |      |          | 68   | 161   | 74    | 72.02  | 38.47  | 91.49  | 60    |       |    |
| 1997                          | 144                |      |          | 72   | 189   | 72    | 74.37  | 37.52  | 98.03  | 56    |       |    |
| 1998                          | 161                |      |          | 77   | 217   | 70    | 75.89  | 36.27  | 102.69 | 55    |       |    |
| 1999                          | 209                |      |          | 190  | 246   | 67    | 89.58  | 81.45  | 105.36 | 49    |       |    |
| 2000                          | 191                |      |          | 85   | 267   | 66    | 73.98  | 33.04  | 103.44 | 56    |       |    |
| 2001                          | 243                |      |          | 207  | 288   | 67    | 86.02  | 73.34  | 102.20 | 48    |       |    |
| 2002                          | 217                |      |          | 88   | 311   | 67    | 71.40  | 28.96  | 102.20 | 55    |       |    |
| 2003                          | 234                |      |          | 90   | 337   | 67    | 71.65  | 27.67  | 103.30 | 54    |       |    |
| 2004                          | 260                |      |          | 94   | 371   | 67    | 74.03  | 26.87  | 105.52 | 52    |       |    |
| 2005                          | 300                |      |          | 100  | 417   | 65    | 78.66  | 26.37  | 109.45 | 48    |       |    |
| 2006                          | 347                | 107  | 469      | 63   | 85.62 | 26.53 | 115.76 | 43     |        |       |       |    |
| 2007                          | 409                | 116  | 540      | 62   | 95.69 | 27.23 | 126.27 | 38     |        |       |       |    |

| Metropolitan Statistical Area | PWID Population | Year   | Number | Min   | Max   | Rank   | Rate   | Min    | Max    | Rank   |    |
|-------------------------------|-----------------|--------|--------|-------|-------|--------|--------|--------|--------|--------|----|
| Sarasota--Bradenton, FL       | Male            | 1992   | 1,690  | 1,462 | 1,915 | 96     | 125.72 | 108.76 | 142.44 | 56     |    |
|                               |                 | 1993   | 1,641  | 1,040 | 1,985 | 92     | 120.37 | 76.27  | 145.62 | 56     |    |
|                               |                 | 1994   | 2,006  | 1,926 | 2,070 | 91     | 144.27 | 138.57 | 148.92 | 46     |    |
|                               |                 | 1995   | 1,905  | 1,077 | 2,317 | 87     | 133.92 | 75.69  | 162.83 | 46     |    |
|                               |                 | 1996   | 2,039  | 1,089 | 2,590 | 86     | 140.56 | 75.08  | 178.56 | 43     |    |
|                               |                 | 1997   | 2,191  | 1,106 | 2,889 | 85     | 147.04 | 74.19  | 193.83 | 43     |    |
|                               |                 | 1998   | 2,355  | 1,125 | 3,187 | 85     | 153.43 | 73.32  | 207.61 | 41     |    |
|                               |                 | 1999   | 2,968  | 2,698 | 3,490 | 83     | 187.98 | 170.93 | 221.10 | 24     |    |
|                               |                 | 2000   | 2,640  | 1,179 | 3,691 | 84     | 162.13 | 72.42  | 226.68 | 34     |    |
|                               |                 | 2001   | 3,275  | 2,792 | 3,891 | 81     | 195.25 | 166.47 | 231.97 | 21     |    |
|                               |                 | 2002   | 2,847  | 1,154 | 4,075 | 85     | 164.54 | 66.72  | 235.49 | 27     |    |
|                               |                 | 2003   | 2,950  | 1,139 | 4,253 | 85     | 165.66 | 63.96  | 238.84 | 27     |    |
|                               |                 | 2004   | 3,116  | 1,131 | 4,441 | 80     | 168.84 | 61.28  | 240.65 | 24     |    |
|                               |                 | 2005   | 3,350  | 1,123 | 4,662 | 75     | 174.70 | 58.56  | 243.07 | 21     |    |
|                               | 2006            | 3,536  | 1,095  | 4,780 | 73    | 180.56 | 55.94  | 244.12 | 20     |        |    |
|                               | 2007            | 3,697  | 1,052  | 4,878 | 72    | 187.11 | 53.25  | 246.91 | 17     |        |    |
|                               |                 | Female | 1992   | 971   | 840   | 1,100  | 91     | 67.19  | 58.12  | 76.12  | 55 |
|                               |                 |        | 1993   | 951   | 602   | 1,150  | 87     | 65.13  | 41.27  | 78.79  | 53 |
|                               |                 |        | 1994   | 1,177 | 1,131 | 1,215  | 86     | 79.18  | 76.05  | 81.73  | 44 |
|                               |                 |        | 1995   | 1,136 | 642   | 1,382  | 86     | 74.86  | 42.31  | 91.02  | 44 |
|                               |                 |        | 1996   | 1,239 | 662   | 1,574  | 86     | 80.34  | 42.92  | 102.07 | 42 |
|                               |                 |        | 1997   | 1,359 | 686   | 1,792  | 85     | 86.10  | 43.44  | 113.50 | 35 |
|                               |                 |        | 1998   | 1,493 | 713   | 2,020  | 83     | 92.03  | 43.98  | 124.53 | 31 |
|                               |                 |        | 1999   | 1,923 | 1,749 | 2,262  | 77     | 115.48 | 105.01 | 135.83 | 14 |
|                               |                 |        | 2000   | 1,748 | 781   | 2,444  | 79     | 101.95 | 45.54  | 142.54 | 17 |
|                               |                 |        | 2001   | 2,213 | 1,887 | 2,630  | 69     | 125.79 | 107.25 | 149.44 | 13 |
|                               | 2002            |        | 1,960  | 795   | 2,805 | 75     | 108.35 | 43.94  | 155.07 | 17     |    |
|                               | 2003            |        | 2,064  | 797   | 2,975 | 74     | 111.51 | 43.05  | 160.76 | 17     |    |
|                               | 2004            | 2,207  | 801    | 3,146 | 66    | 115.66 | 41.98  | 164.86 | 14     |        |    |
|                               | 2005            | 2,393  | 802    | 3,329 | 65    | 121.03 | 40.57  | 168.41 | 12     |        |    |
|                               | 2006            | 2,534  | 785    | 3,425 | 62    | 126.05 | 39.06  | 170.43 | 9      |        |    |
|                               | 2007            | 2,643  | 752    | 3,488 | 58    | 130.99 | 37.28  | 172.85 | 8      |        |    |



| Metropolitan Statistical Area | PWID Population | Year        | Number | Min   | Max   | Rank   | Rate   | Min    | Max    | Rank   |    |
|-------------------------------|-----------------|-------------|--------|-------|-------|--------|--------|--------|--------|--------|----|
| Sarasota--Bradenton, FL       | Young (15-29)   | 1992        | 537    | 465   | 609   | 98     | 72.60  | 62.80  | 82.25  | 62     |    |
|                               |                 | 1993        | 545    | 345   | 660   | 94     | 74.62  | 47.29  | 90.28  | 55     |    |
|                               |                 | 1994        | 711    | 683   | 734   | 91     | 98.08  | 94.20  | 101.24 | 39     |    |
|                               |                 | 1995        | 732    | 414   | 890   | 88     | 100.91 | 57.03  | 122.69 | 41     |    |
|                               |                 | 1996        | 859    | 459   | 1,091 | 85     | 117.85 | 62.95  | 149.71 | 32     |    |
|                               |                 | 1997        | 1,018  | 514   | 1,342 | 82     | 137.60 | 69.42  | 181.38 | 17     |    |
|                               |                 | 1998        | 1,209  | 578   | 1,637 | 79     | 160.11 | 76.51  | 216.65 | 13     |    |
|                               |                 | 1999        | 1,681  | 1,528 | 1,977 | 68     | 218.58 | 198.75 | 257.09 | 4      |    |
|                               |                 | 2000        | 1,640  | 733   | 2,293 | 70     | 208.63 | 93.19  | 291.70 | 4      |    |
|                               |                 | 2001        | 2,212  | 1,886 | 2,628 | 58     | 269.74 | 229.98 | 320.46 | 3      |    |
|                               |                 | 2002        | 2,067  | 838   | 2,958 | 63     | 240.09 | 97.36  | 343.63 | 4      |    |
|                               |                 | 2003        | 2,272  | 877   | 3,275 | 59     | 250.97 | 96.90  | 361.83 | 4      |    |
|                               |                 | 2004        | 2,507  | 910   | 3,573 | 55     | 261.55 | 94.93  | 372.80 | 4      |    |
|                               |                 | 2005        | 2,769  | 928   | 3,853 | 51     | 272.05 | 91.19  | 378.52 | 3      |    |
|                               |                 | 2006        | 2,946  | 913   | 3,984 | 48     | 279.14 | 86.49  | 377.40 | 2      |    |
|                               | 2007            | 3,041       | 865    | 4,013 | 45    | 282.60 | 80.43  | 372.92 | 4      |        |    |
|                               |                 | Old (30-64) | 1992   | 2,122 | 1,836 | 2,404  | 93     | 103.54 | 89.57  | 117.31 | 62 |
|                               |                 |             | 1993   | 2,048 | 1,298 | 2,478  | 88     | 97.88  | 62.02  | 118.41 | 59 |
|                               |                 |             | 1994   | 2,479 | 2,381 | 2,559  | 87     | 115.21 | 110.65 | 118.92 | 45 |
|                               |                 |             | 1995   | 2,323 | 1,313 | 2,824  | 87     | 104.86 | 59.26  | 127.50 | 49 |
|                               |                 |             | 1996   | 2,439 | 1,303 | 3,099  | 86     | 107.76 | 57.56  | 136.90 | 47 |
|                               | 1997            |             | 2,561  | 1,292 | 3,376 | 86     | 109.94 | 55.47  | 144.93 | 46     |    |
|                               | 1998            |             | 2,673  | 1,277 | 3,617 | 86     | 111.30 | 53.19  | 150.60 | 44     |    |
|                               | 1999            |             | 3,254  | 2,959 | 3,827 | 81     | 131.49 | 119.56 | 154.65 | 34     |    |
|                               | 2000            |             | 2,783  | 1,243 | 3,892 | 84     | 108.84 | 48.62  | 152.18 | 43     |    |
|                               | 2001            |             | 3,307  | 2,820 | 3,929 | 79     | 126.37 | 107.74 | 150.13 | 36     |    |
|                               | 2002            | 2,748       | 1,114  | 3,933 | 83    | 102.60 | 41.60  | 146.84 | 42     |        |    |
|                               | 2003            | 2,722       | 1,051  | 3,925 | 83    | 99.86  | 38.55  | 143.96 | 45     |        |    |
|                               | 2004            | 2,756       | 1,000  | 3,928 | 82    | 98.60  | 35.78  | 140.53 | 43     |        |    |
|                               | 2005            | 2,855       | 957    | 3,972 | 80    | 99.24  | 33.27  | 138.09 | 41     |        |    |
|                               | 2006            | 2,927       | 907    | 3,957 | 80    | 100.48 | 31.13  | 135.86 | 35     |        |    |
|                               | 2007            | 3,006       | 855    | 3,966 | 76    | 103.03 | 29.32  | 135.96 | 29     |        |    |

| Metropolitan Statistical Area        | PWID Population | Year  | Number             | Min   | Max   | Rank  | Rate  | Min   | Max   | Rank  |       |    |
|--------------------------------------|-----------------|-------|--------------------|-------|-------|-------|-------|-------|-------|-------|-------|----|
| Scranton--Wilkes-Barre--Hazleton, PA | Total           | 1992  | 1,671              | 1,155 | 1,947 | 98    | 41.51 | 28.71 | 48.39 | 98    |       |    |
|                                      |                 | 1993  | 1,806              | 1,173 | 2,153 | 98    | 44.92 | 29.17 | 53.54 | 96    |       |    |
|                                      |                 | 1994  | 1,711              | 1,188 | 1,999 | 98    | 42.64 | 29.60 | 49.81 | 98    |       |    |
|                                      |                 | 1995  | 1,874              | 1,205 | 2,295 | 97    | 46.73 | 30.03 | 57.22 | 95    |       |    |
|                                      |                 | 1996  | 1,904              | 1,219 | 2,341 | 97    | 47.53 | 30.44 | 58.44 | 93    |       |    |
|                                      |                 | 1997  | 1,922              | 1,231 | 2,354 | 97    | 48.18 | 30.85 | 59.03 | 93    |       |    |
|                                      |                 | 1998  | 1,946              | 1,248 | 2,373 | 97    | 48.90 | 31.36 | 59.61 | 92    |       |    |
|                                      |                 | 1999  | 1,833              | 1,267 | 2,194 | 99    | 46.10 | 31.86 | 55.17 | 95    |       |    |
|                                      |                 | 2000  | 2,030              | 1,314 | 2,421 | 96    | 51.17 | 33.12 | 61.01 | 90    |       |    |
|                                      |                 | 2001  | 1,970              | 1,364 | 2,467 | 99    | 49.67 | 34.39 | 62.22 | 95    |       |    |
|                                      |                 | 2002  | 2,080              | 1,433 | 2,690 | 98    | 52.38 | 36.09 | 67.76 | 86    |       |    |
|                                      |                 | 2003  | 2,123              | 1,505 | 2,919 | 98    | 53.30 | 37.79 | 73.29 | 88    |       |    |
|                                      |                 | 2004  | 2,170              | 1,584 | 3,163 | 98    | 54.23 | 39.58 | 79.06 | 88    |       |    |
|                                      |                 | 2005  | 2,212              | 1,576 | 3,409 | 99    | 55.05 | 39.23 | 84.82 | 88    |       |    |
|                                      |                 | 2006  | 2,257              | 1,385 | 3,661 | 99    | 55.97 | 34.36 | 90.79 | 84    |       |    |
|                                      |                 | 2007  | 2,303              | 1,186 | 3,920 | 98    | 56.84 | 29.29 | 96.76 | 84    |       |    |
|                                      |                 |       | Non-Hispanic White | 1992  | 1,357 | 939   | 1,582 | 95    | 34.61 | 23.93 | 40.34 | 93 |
|                                      |                 |       |                    | 1993  | 1,466 | 952   | 1,747 | 91    | 37.45 | 24.32 | 44.64 | 84 |
|                                      |                 |       |                    | 1994  | 1,400 | 972   | 1,636 | 95    | 35.88 | 24.91 | 41.92 | 88 |
|                                      |                 |       |                    | 1995  | 1,556 | 1,000 | 1,906 | 89    | 39.96 | 25.68 | 48.93 | 81 |
| 1996                                 | 1,610           |       |                    | 1,031 | 1,979 | 87    | 41.46 | 26.55 | 50.98 | 80    |       |    |
| 1997                                 | 1,655           |       |                    | 1,060 | 2,027 | 87    | 42.87 | 27.45 | 52.52 | 78    |       |    |
| 1998                                 | 1,705           |       |                    | 1,093 | 2,078 | 87    | 44.32 | 28.42 | 54.03 | 76    |       |    |
| 1999                                 | 1,629           |       |                    | 1,126 | 1,949 | 88    | 42.45 | 29.34 | 50.81 | 80    |       |    |
| 2000                                 | 1,823           |       |                    | 1,180 | 2,174 | 87    | 47.72 | 30.89 | 56.90 | 73    |       |    |
| 2001                                 | 1,780           |       |                    | 1,232 | 2,230 | 88    | 46.74 | 32.36 | 58.55 | 77    |       |    |
| 2002                                 | 1,883           |       |                    | 1,297 | 2,436 | 87    | 49.51 | 34.11 | 64.05 | 73    |       |    |
| 2003                                 | 1,916           |       |                    | 1,358 | 2,634 | 87    | 50.39 | 35.72 | 69.28 | 73    |       |    |
| 2004                                 | 1,936           |       |                    | 1,413 | 2,823 | 89    | 50.89 | 37.15 | 74.19 | 72    |       |    |
| 2005                                 | 1,932           |       |                    | 1,376 | 2,976 | 88    | 50.74 | 36.16 | 78.18 | 75    |       |    |
| 2006                                 | 1,894           | 1,163 | 3,073              | 91    | 49.85 | 30.60 | 80.86 | 80    |       |       |       |    |
| 2007                                 | 1,804           | 929   | 3,070              | 92    | 47.53 | 24.49 | 80.91 | 83    |       |       |       |    |

| Metropolitan Statistical Area        | PWID Population    | Year | Number   | Min  | Max   | Rank  | Rate   | Min    | Max    | Rank   |        |    |
|--------------------------------------|--------------------|------|----------|------|-------|-------|--------|--------|--------|--------|--------|----|
| Scranton--Wilkes-Barre--Hazleton, PA | Non-Hispanic Black | 1992 | 192      | 133  | 224   | 99    | 405.14 | 280.20 | 472.29 | 28     |        |    |
|                                      |                    | 1993 | 199      | 129  | 237   | 99    | 404.75 | 262.85 | 482.42 | 23     |        |    |
|                                      |                    | 1994 | 175      | 122  | 205   | 99    | 348.46 | 241.94 | 407.09 | 33     |        |    |
|                                      |                    | 1995 | 174      | 112  | 213   | 99    | 332.06 | 213.43 | 406.64 | 27     |        |    |
|                                      |                    | 1996 | 157      | 101  | 193   | 99    | 281.49 | 180.29 | 346.12 | 36     |        |    |
|                                      |                    | 1997 | 139      | 89   | 170   | 99    | 239.57 | 153.41 | 293.52 | 44     |        |    |
|                                      |                    | 1998 | 122      | 78   | 149   | 99    | 203.80 | 130.69 | 248.44 | 48     |        |    |
|                                      |                    | 1999 | 100      | 69   | 120   | 99    | 161.04 | 111.31 | 192.74 | 68     |        |    |
|                                      |                    | 2000 | 97       | 63   | 115   | 100   | 149.98 | 97.10  | 178.84 | 65     |        |    |
|                                      |                    | 2001 | 83       | 57   | 104   | 100   | 122.84 | 85.05  | 153.89 | 75     |        |    |
|                                      |                    | 2002 | 79       | 55   | 102   | 100   | 111.40 | 76.75  | 144.10 | 71     |        |    |
|                                      |                    | 2003 | 75       | 53   | 103   | 100   | 99.53  | 70.56  | 136.86 | 74     |        |    |
|                                      |                    | 2004 | 74       | 54   | 108   | 100   | 92.63  | 67.62  | 135.04 | 77     |        |    |
|                                      |                    | 2005 | 76       | 54   | 117   | 100   | 90.38  | 64.40  | 139.26 | 78     |        |    |
|                                      |                    | 2006 | 82       | 50   | 133   | 100   | 91.08  | 55.91  | 147.75 | 78     |        |    |
|                                      |                    | 2007 | 94       | 48   | 160   | 100   | 97.27  | 50.12  | 165.58 | 75     |        |    |
|                                      |                    |      | Hispanic | 1992 | 58    | 40    | 68     | 84     | 211.44 | 146.23 | 246.48 | 31 |
|                                      |                    |      |          | 1993 | 50    | 32    | 60     | 85     | 169.75 | 110.24 | 202.33 | 37 |
|                                      |                    |      |          | 1994 | 39    | 27    | 45     | 88     | 124.72 | 86.60  | 145.71 | 44 |
|                                      |                    |      |          | 1995 | 35    | 23    | 43     | 91     | 106.08 | 68.18  | 129.91 | 48 |
| 1996                                 | 31                 |      |          | 20   | 38    | 91    | 85.40  | 54.70  | 105.01 | 53     |        |    |
| 1997                                 | 27                 |      |          | 18   | 34    | 93    | 70.76  | 45.31  | 86.69  | 59     |        |    |
| 1998                                 | 25                 |      |          | 16   | 31    | 93    | 60.20  | 38.60  | 73.38  | 65     |        |    |
| 1999                                 | 22                 |      |          | 15   | 26    | 96    | 48.44  | 33.48  | 57.97  | 75     |        |    |
| 2000                                 | 23                 |      |          | 15   | 27    | 96    | 45.89  | 29.71  | 54.72  | 69     |        |    |
| 2001                                 | 21                 |      |          | 15   | 26    | 96    | 38.88  | 26.92  | 48.71  | 77     |        |    |
| 2002                                 | 22                 |      |          | 15   | 28    | 96    | 36.62  | 25.23  | 47.37  | 74     |        |    |
| 2003                                 | 22                 |      |          | 16   | 30    | 96    | 32.48  | 23.03  | 44.67  | 78     |        |    |
| 2004                                 | 23                 |      |          | 17   | 33    | 96    | 29.47  | 21.51  | 42.97  | 79     |        |    |
| 2005                                 | 24                 |      |          | 17   | 37    | 96    | 27.15  | 19.34  | 41.83  | 83     |        |    |
| 2006                                 | 26                 |      |          | 16   | 42    | 96    | 25.63  | 15.73  | 41.58  | 86     |        |    |
| 2007                                 | 28                 | 15   | 48       | 96   | 24.19 | 12.46 | 41.17  | 91     |        |        |        |    |

| Metropolitan Statistical Area        | PWID Population | Year   | Number | Min   | Max   | Rank  | Rate  | Min    | Max    | Rank  |     |
|--------------------------------------|-----------------|--------|--------|-------|-------|-------|-------|--------|--------|-------|-----|
| Scranton--Wilkes-Barre--Hazleton, PA | Male            | 1992   | 1,233  | 853   | 1,438 | 97    | 62.12 | 42.96  | 72.42  | 98    |     |
|                                      |                 | 1993   | 1,314  | 853   | 1,566 | 97    | 66.12 | 42.94  | 78.81  | 94    |     |
|                                      |                 | 1994   | 1,228  | 853   | 1,434 | 97    | 61.81 | 42.91  | 72.21  | 98    |     |
|                                      |                 | 1995   | 1,328  | 853   | 1,626 | 96    | 66.79 | 42.93  | 81.79  | 91    |     |
|                                      |                 | 1996   | 1,332  | 853   | 1,638 | 95    | 67.02 | 42.93  | 82.41  | 91    |     |
|                                      |                 | 1997   | 1,330  | 852   | 1,629 | 95    | 67.09 | 42.96  | 82.20  | 89    |     |
|                                      |                 | 1998   | 1,333  | 855   | 1,625 | 95    | 67.32 | 43.17  | 82.07  | 87    |     |
|                                      |                 | 1999   | 1,245  | 860   | 1,490 | 98    | 62.79 | 43.40  | 75.15  | 95    |     |
|                                      |                 | 2000   | 1,367  | 885   | 1,631 | 94    | 69.04 | 44.70  | 82.33  | 84    |     |
|                                      |                 | 2001   | 1,318  | 912   | 1,650 | 98    | 66.58 | 46.10  | 83.41  | 91    |     |
|                                      |                 | 2002   | 1,383  | 953   | 1,789 | 95    | 69.75 | 48.05  | 90.22  | 81    |     |
|                                      |                 | 2003   | 1,406  | 997   | 1,933 | 95    | 70.58 | 50.03  | 97.04  | 82    |     |
|                                      |                 | 2004   | 1,432  | 1,045 | 2,088 | 96    | 71.51 | 52.20  | 104.26 | 80    |     |
|                                      |                 | 2005   | 1,457  | 1,038 | 2,245 | 98    | 72.47 | 51.64  | 111.66 | 80    |     |
|                                      |                 | 2006   | 1,485  | 912   | 2,409 | 98    | 73.54 | 45.14  | 119.29 | 79    |     |
|                                      | 2007            | 1,515  | 781    | 2,579 | 98    | 74.66 | 38.47 | 127.09 | 77     |       |     |
|                                      |                 | Female | 1992   | 479   | 331   | 558   | 100   | 23.48  | 16.24  | 27.37 | 100 |
|                                      |                 |        | 1993   | 532   | 345   | 634   | 99    | 26.16  | 16.99  | 31.18 | 97  |
|                                      |                 |        | 1994   | 518   | 359   | 605   | 100   | 25.55  | 17.74  | 29.85 | 100 |
|                                      |                 |        | 1995   | 582   | 374   | 713   | 97    | 28.79  | 18.51  | 35.26 | 93  |
|                                      |                 |        | 1996   | 607   | 389   | 747   | 97    | 30.09  | 19.27  | 37.00 | 94  |
|                                      |                 |        | 1997   | 628   | 402   | 769   | 98    | 31.28  | 20.03  | 38.32 | 94  |
|                                      |                 |        | 1998   | 650   | 417   | 792   | 97    | 32.49  | 20.84  | 39.61 | 93  |
|                                      |                 |        | 1999   | 624   | 431   | 747   | 98    | 31.28  | 21.62  | 37.43 | 94  |
|                                      |                 |        | 2000   | 702   | 455   | 837   | 97    | 35.33  | 22.87  | 42.12 | 93  |
|                                      | 2001            |        | 690    | 477   | 864   | 98    | 34.72 | 24.03  | 43.49  | 92    |     |
|                                      | 2002            | 734    | 506    | 950   | 97    | 36.95 | 25.46 | 47.80  | 91     |       |     |
|                                      | 2003            | 752    | 533    | 1,034 | 97    | 37.78 | 26.78 | 51.95  | 91     |       |     |
|                                      | 2004            | 767    | 560    | 1,119 | 97    | 38.40 | 28.03 | 55.98  | 88     |       |     |
|                                      | 2005            | 777    | 553    | 1,197 | 98    | 38.68 | 27.56 | 59.60  | 89     |       |     |
|                                      | 2006            | 782    | 480    | 1,268 | 98    | 38.83 | 23.84 | 62.99  | 88     |       |     |
|                                      | 2007            | 781    | 402    | 1,330 | 98    | 38.65 | 19.91 | 65.79  | 87     |       |     |

| Metropolitan Statistical Area        | PWID Population | Year  | Number      | Min   | Max   | Rank  | Rate   | Min   | Max    | Rank  |       |    |
|--------------------------------------|-----------------|-------|-------------|-------|-------|-------|--------|-------|--------|-------|-------|----|
| Scranton--Wilkes-Barre--Hazleton, PA | Young (15-29)   | 1992  | 542         | 375   | 632   | 97    | 41.89  | 28.97 | 48.84  | 87    |       |    |
|                                      |                 | 1993  | 607         | 394   | 723   | 91    | 47.69  | 30.97 | 56.84  | 76    |       |    |
|                                      |                 | 1994  | 611         | 424   | 714   | 92    | 48.94  | 33.98 | 57.17  | 79    |       |    |
|                                      |                 | 1995  | 725         | 466   | 888   | 89    | 58.80  | 37.79 | 72.01  | 64    |       |    |
|                                      |                 | 1996  | 806         | 516   | 992   | 88    | 66.12  | 42.35 | 81.30  | 59    |       |    |
|                                      |                 | 1997  | 893         | 572   | 1,094 | 86    | 74.23  | 47.54 | 90.95  | 58    |       |    |
|                                      |                 | 1998  | 989         | 634   | 1,205 | 85    | 83.10  | 53.29 | 101.30 | 53    |       |    |
|                                      |                 | 1999  | 1,009       | 697   | 1,208 | 86    | 86.14  | 59.54 | 103.10 | 53    |       |    |
|                                      |                 | 2000  | 1,196       | 774   | 1,426 | 84    | 103.59 | 67.07 | 123.53 | 43    |       |    |
|                                      |                 | 2001  | 1,224       | 847   | 1,533 | 86    | 106.44 | 73.69 | 133.34 | 40    |       |    |
|                                      |                 | 2002  | 1,342       | 925   | 1,736 | 85    | 116.44 | 80.22 | 150.62 | 38    |       |    |
|                                      |                 | 2003  | 1,400       | 993   | 1,926 | 84    | 120.37 | 85.34 | 165.52 | 35    |       |    |
|                                      |                 | 2004  | 1,437       | 1,049 | 2,095 | 86    | 121.83 | 88.93 | 177.61 | 29    |       |    |
|                                      |                 | 2005  | 1,441       | 1,027 | 2,220 | 86    | 120.55 | 85.90 | 185.74 | 31    |       |    |
|                                      |                 | 2006  | 1,409       | 865   | 2,285 | 85    | 116.70 | 71.63 | 189.30 | 34    |       |    |
|                                      |                 | 2007  | 1,329       | 685   | 2,262 | 85    | 108.90 | 56.11 | 185.38 | 39    |       |    |
|                                      |                 |       | Old (30-64) | 1992  | 1,199 | 829   | 1,398  | 97    | 43.91  | 30.37 | 51.18 | 99 |
|                                      |                 |       |             | 1993  | 1,253 | 814   | 1,494  | 97    | 45.60  | 29.61 | 54.35 | 96 |
|                                      |                 |       |             | 1994  | 1,138 | 790   | 1,329  | 99    | 41.16  | 28.57 | 48.08 | 99 |
|                                      |                 |       |             | 1995  | 1,183 | 760   | 1,449  | 99    | 42.60  | 27.38 | 52.17 | 97 |
|                                      | 1996            | 1,131 |             | 725   | 1,391 | 99    | 40.60  | 26.01 | 49.92  | 98    |       |    |
|                                      | 1997            | 1,066 |             | 683   | 1,306 | 99    | 38.26  | 24.50 | 46.87  | 98    |       |    |
|                                      | 1998            | 1,001 |             | 642   | 1,220 | 99    | 35.87  | 23.00 | 43.72  | 98    |       |    |
|                                      | 1999            | 871   |             | 602   | 1,042 | 99    | 31.03  | 21.45 | 37.14  | 99    |       |    |
|                                      | 2000            | 890   |             | 576   | 1,062 | 99    | 31.64  | 20.48 | 37.73  | 99    |       |    |
|                                      | 2001            | 801   |             | 554   | 1,003 | 100   | 28.43  | 19.68 | 35.62  | 100   |       |    |
|                                      | 2002            | 791   |             | 545   | 1,023 | 100   | 28.06  | 19.33 | 36.29  | 100   |       |    |
|                                      | 2003            | 765   |             | 542   | 1,052 | 100   | 27.13  | 19.24 | 37.31  | 100   |       |    |
|                                      | 2004            | 755   |             | 551   | 1,101 | 100   | 26.76  | 19.53 | 39.01  | 100   |       |    |
|                                      | 2005            | 761   |             | 542   | 1,172 | 100   | 26.94  | 19.19 | 41.51  | 100   |       |    |
|                                      | 2006            | 788   | 484         | 1,278 | 99    | 27.88 | 17.11  | 45.22 | 99     |       |       |    |
|                                      | 2007            | 841   | 433         | 1,432 | 99    | 29.72 | 15.31  | 50.59 | 98     |       |       |    |

| Metropolitan Statistical Area  | PWID Population | Year   | Number             | Min    | Max    | Rank  | Rate   | Min    | Max    | Rank  |        |    |
|--------------------------------|-----------------|--------|--------------------|--------|--------|-------|--------|--------|--------|-------|--------|----|
| Seattle--Bellevue--Everett, WA | Total           | 1992   | 17,628             | 2,555  | 33,130 | 26    | 120.48 | 17.46  | 226.43 | 45    |        |    |
|                                |                 | 1993   | 23,643             | 2,852  | 42,677 | 17    | 158.21 | 19.08  | 285.58 | 26    |        |    |
|                                |                 | 1994   | 16,856             | 3,167  | 29,574 | 25    | 111.24 | 20.90  | 195.18 | 46    |        |    |
|                                |                 | 1995   | 22,325             | 3,501  | 39,948 | 17    | 144.85 | 22.72  | 259.19 | 31    |        |    |
|                                |                 | 1996   | 21,814             | 3,908  | 38,646 | 17    | 139.04 | 24.91  | 246.33 | 32    |        |    |
|                                |                 | 1997   | 21,484             | 4,371  | 37,640 | 18    | 133.21 | 27.10  | 233.38 | 33    |        |    |
|                                |                 | 1998   | 21,567             | 4,908  | 36,362 | 17    | 130.75 | 29.75  | 220.44 | 30    |        |    |
|                                |                 | 1999   | 17,037             | 5,419  | 25,974 | 21    | 101.87 | 32.40  | 155.31 | 50    |        |    |
|                                |                 | 2000   | 22,222             | 6,811  | 33,276 | 17    | 131.36 | 40.26  | 196.71 | 29    |        |    |
|                                |                 | 2001   | 20,181             | 8,280  | 31,957 | 19    | 117.28 | 48.12  | 185.72 | 39    |        |    |
|                                |                 | 2002   | 24,137             | 9,792  | 34,972 | 14    | 139.00 | 56.39  | 201.39 | 21    |        |    |
|                                |                 | 2003   | 24,943             | 11,284 | 37,883 | 14    | 142.93 | 64.66  | 217.07 | 18    |        |    |
|                                |                 | 2004   | 25,689             | 12,920 | 40,226 | 13    | 145.83 | 73.35  | 228.35 | 17    |        |    |
|                                |                 | 2005   | 26,550             | 14,646 | 42,784 | 14    | 148.71 | 82.03  | 239.64 | 17    |        |    |
|                                |                 | 2006   | 27,528             | 16,628 | 45,370 | 13    | 151.46 | 91.49  | 249.62 | 17    |        |    |
|                                |                 | 2007   | 28,402             | 18,589 | 47,810 | 11    | 154.22 | 100.94 | 259.61 | 16    |        |    |
|                                |                 |        | Non-Hispanic White | 1992   | 11,814 | 1,712 | 22,202 | 17     | 95.86  | 13.89 | 180.15 | 39 |
|                                |                 |        |                    | 1993   | 15,938 | 1,922 | 28,770 | 8      | 127.68 | 15.40 | 230.47 | 25 |
|                                |                 |        |                    | 1994   | 11,396 | 2,141 | 19,994 | 15     | 90.85  | 17.07 | 159.40 | 43 |
|                                |                 |        |                    | 1995   | 15,096 | 2,367 | 27,013 | 8      | 119.44 | 18.73 | 213.72 | 25 |
| 1996                           | 14,718          |        |                    | 2,637  | 26,074 | 8     | 115.52 | 20.69  | 204.66 | 26    |        |    |
| 1997                           | 14,431          |        |                    | 2,936  | 25,283 | 8     | 111.26 | 22.63  | 194.92 | 26    |        |    |
| 1998                           | 14,393          |        |                    | 3,275  | 24,268 | 8     | 109.55 | 24.93  | 184.71 | 24    |        |    |
| 1999                           | 11,275          |        |                    | 3,586  | 17,190 | 16    | 85.51  | 27.20  | 130.37 | 44    |        |    |
| 2000                           | 14,558          |        |                    | 4,462  | 21,799 | 7     | 110.22 | 33.78  | 165.04 | 25    |        |    |
| 2001                           | 13,065          |        |                    | 5,360  | 20,688 | 14    | 97.96  | 40.19  | 155.12 | 35    |        |    |
| 2002                           | 15,417          |        |                    | 6,254  | 22,338 | 7     | 115.36 | 46.80  | 167.14 | 20    |        |    |
| 2003                           | 15,696          |        |                    | 7,101  | 23,839 | 7     | 117.63 | 53.21  | 178.66 | 19    |        |    |
| 2004                           | 15,907          |        |                    | 8,000  | 24,909 | 7     | 118.88 | 59.79  | 186.16 | 18    |        |    |
| 2005                           | 16,160          |        |                    | 8,914  | 26,041 | 6     | 119.97 | 66.18  | 193.33 | 20    |        |    |
| 2006                           | 16,456          |        |                    | 9,940  | 27,122 | 8     | 120.89 | 73.02  | 199.25 | 20    |        |    |
| 2007                           | 16,666          | 10,908 | 28,055             | 8      | 121.69 | 79.65 | 204.85 | 20     |        |       |        |    |

| Metropolitan Statistical Area  | PWID Population    | Year     | Number | Min   | Max    | Rank   | Rate   | Min    | Max     | Rank   |    |
|--------------------------------|--------------------|----------|--------|-------|--------|--------|--------|--------|---------|--------|----|
| Seattle--Bellevue--Everett, WA | Non-Hispanic Black | 1992     | 3,344  | 485   | 6,284  | 31     | 572.66 | 83.00  | 1076.23 | 12     |    |
|                                |                    | 1993     | 4,430  | 534   | 7,997  | 23     | 729.17 | 87.95  | 1316.21 | 5      |    |
|                                |                    | 1994     | 3,094  | 581   | 5,428  | 32     | 489.06 | 91.88  | 858.06  | 13     |    |
|                                |                    | 1995     | 3,986  | 625   | 7,132  | 24     | 605.39 | 94.94  | 1083.28 | 6      |    |
|                                |                    | 1996     | 3,770  | 675   | 6,680  | 24     | 546.69 | 97.93  | 968.53  | 7      |    |
|                                |                    | 1997     | 3,586  | 730   | 6,283  | 23     | 492.70 | 100.23 | 863.19  | 8      |    |
|                                |                    | 1998     | 3,475  | 791   | 5,860  | 23     | 463.79 | 105.53 | 781.96  | 9      |    |
|                                |                    | 1999     | 2,656  | 845   | 4,049  | 31     | 344.44 | 109.55 | 525.13  | 14     |    |
|                                |                    | 2000     | 3,367  | 1,032 | 5,042  | 23     | 424.40 | 130.07 | 635.53  | 8      |    |
|                                |                    | 2001     | 2,992  | 1,228 | 4,738  | 25     | 365.47 | 149.94 | 578.72  | 8      |    |
|                                |                    | 2002     | 3,535  | 1,434 | 5,121  | 21     | 422.67 | 171.47 | 612.41  | 7      |    |
|                                |                    | 2003     | 3,651  | 1,652 | 5,545  | 19     | 429.58 | 194.34 | 652.44  | 6      |    |
|                                |                    | 2004     | 3,813  | 1,918 | 5,970  | 18     | 439.26 | 220.92 | 687.83  | 6      |    |
|                                |                    | 2005     | 4,064  | 2,242 | 6,549  | 17     | 454.87 | 250.92 | 733.00  | 6      |    |
|                                |                    | 2006     | 4,433  | 2,677 | 7,306  | 17     | 481.14 | 290.63 | 792.99  | 5      |    |
|                                | 2007               | 4,918    | 3,219  | 8,279 | 16     | 521.87 | 341.56 | 878.48 | 5       |        |    |
|                                |                    | Hispanic | 1992   | 706   | 102    | 1,327  | 45     | 155.04 | 22.47   | 291.38 | 44 |
|                                |                    |          | 1993   | 885   | 107    | 1,597  | 40     | 178.56 | 21.54   | 322.32 | 36 |
|                                |                    |          | 1994   | 601   | 113    | 1,054  | 49     | 112.54 | 21.14   | 197.46 | 51 |
|                                |                    |          | 1995   | 771   | 121    | 1,380  | 45     | 133.01 | 20.86   | 238.00 | 40 |
|                                |                    |          | 1996   | 742   | 133    | 1,315  | 48     | 117.31 | 21.01   | 207.83 | 41 |
| 1997                           |                    |          | 731    | 149   | 1,281  | 49     | 104.56 | 21.27  | 183.18  | 42     |    |
| 1998                           |                    |          | 744    | 169   | 1,255  | 49     | 97.87  | 22.27  | 165.01  | 44     |    |
| 1999                           |                    |          | 604    | 192   | 920    | 53     | 73.76  | 23.46  | 112.46  | 58     |    |
| 2000                           |                    |          | 818    | 251   | 1,225  | 47     | 93.65  | 28.70  | 140.23  | 47     |    |
| 2001                           |                    |          | 780    | 320   | 1,235  | 49     | 83.76  | 34.36  | 132.64  | 49     |    |
| 2002                           |                    |          | 989    | 401   | 1,432  | 47     | 101.59 | 41.21  | 147.20  | 42     |    |
| 2003                           |                    |          | 1,093  | 494   | 1,660  | 46     | 108.31 | 49.00  | 164.51  | 35     |    |
| 2004                           |                    |          | 1,214  | 611   | 1,901  | 46     | 115.33 | 58.01  | 180.60  | 33     |    |
| 2005                           |                    |          | 1,365  | 753   | 2,199  | 41     | 123.71 | 68.24  | 199.35  | 25     |    |
| 2006                           |                    |          | 1,551  | 937   | 2,557  | 41     | 133.50 | 80.64  | 220.03  | 24     |    |
| 2007                           | 1,769              | 1,158    | 2,978  | 37    | 145.89 | 95.48  | 245.58 | 24     |         |        |    |

| Metropolitan Statistical Area  | PWID Population | Year   | Number | Min    | Max    | Rank   | Rate   | Min    | Max    | Rank   |    |
|--------------------------------|-----------------|--------|--------|--------|--------|--------|--------|--------|--------|--------|----|
| Seattle--Bellevue--Everett, WA | Male            | 1992   | 10,512 | 1,524  | 19,757 | 32     | 142.54 | 20.66  | 267.88 | 48     |    |
|                                |                 | 1993   | 14,229 | 1,716  | 25,684 | 16     | 188.72 | 22.76  | 340.65 | 34     |    |
|                                |                 | 1994   | 10,198 | 1,916  | 17,892 | 28     | 133.34 | 25.05  | 233.94 | 49     |    |
|                                |                 | 1995   | 13,535 | 2,123  | 24,219 | 17     | 173.89 | 27.27  | 311.15 | 35     |    |
|                                |                 | 1996   | 13,221 | 2,368  | 23,422 | 17     | 166.65 | 29.85  | 295.24 | 37     |    |
|                                |                 | 1997   | 12,995 | 2,644  | 22,767 | 17     | 159.24 | 32.40  | 278.99 | 38     |    |
|                                |                 | 1998   | 13,005 | 2,959  | 21,926 | 17     | 155.89 | 35.47  | 262.83 | 37     |    |
|                                |                 | 1999   | 10,238 | 3,256  | 15,609 | 25     | 120.97 | 38.47  | 184.42 | 53     |    |
|                                |                 | 2000   | 13,312 | 4,080  | 19,935 | 18     | 155.44 | 47.64  | 232.76 | 37     |    |
|                                |                 | 2001   | 12,065 | 4,950  | 19,105 | 19     | 138.31 | 56.75  | 219.02 | 41     |    |
|                                |                 | 2002   | 14,426 | 5,852  | 20,902 | 15     | 163.95 | 66.51  | 237.56 | 28     |    |
|                                |                 | 2003   | 14,940 | 6,758  | 22,690 | 15     | 169.13 | 76.51  | 256.87 | 25     |    |
|                                |                 | 2004   | 15,468 | 7,780  | 24,222 | 15     | 173.71 | 87.37  | 272.00 | 22     |    |
|                                |                 | 2005   | 16,132 | 8,899  | 25,995 | 14     | 178.57 | 98.51  | 287.76 | 20     |    |
|                                |                 | 2006   | 16,950 | 10,238 | 27,936 | 13     | 184.16 | 111.24 | 303.52 | 17     |    |
|                                | 2007            | 17,804 | 11,653 | 29,970 | 13     | 190.99 | 125.01 | 321.51 | 15     |        |    |
|                                |                 | Female | 1992   | 6,986  | 1,013  | 13,129 | 22     | 96.28  | 13.96  | 180.94 | 37 |
|                                |                 |        | 1993   | 9,295  | 1,121  | 16,779 | 14     | 125.54 | 15.14  | 226.61 | 18 |
|                                |                 |        | 1994   | 6,619  | 1,244  | 11,614 | 22     | 88.20  | 16.57  | 154.75 | 37 |
|                                |                 |        | 1995   | 8,803  | 1,381  | 15,752 | 16     | 115.38 | 18.10  | 206.47 | 18 |
|                                |                 |        | 1996   | 8,669  | 1,553  | 15,359 | 17     | 111.78 | 20.03  | 198.04 | 17 |
|                                |                 |        | 1997   | 8,626  | 1,755  | 15,112 | 17     | 108.26 | 22.02  | 189.67 | 18 |
|                                |                 |        | 1998   | 8,754  | 1,992  | 14,760 | 17     | 107.38 | 24.43  | 181.04 | 16 |
|                                |                 |        | 1999   | 6,987  | 2,222  | 10,652 | 19     | 84.59  | 26.90  | 128.96 | 40 |
|                                |                 |        | 2000   | 9,188  | 2,816  | 13,759 | 13     | 110.01 | 33.72  | 164.74 | 15 |
|                                |                 |        | 2001   | 8,384  | 3,440  | 13,277 | 17     | 98.82  | 40.54  | 156.49 | 26 |
|                                |                 |        | 2002   | 10,026 | 4,067  | 14,527 | 12     | 117.04 | 47.48  | 169.59 | 13 |
|                                | 2003            |        | 10,295 | 4,657  | 15,636 | 11     | 119.46 | 54.04  | 181.43 | 12     |    |
|                                | 2004            | 10,454 | 5,258  | 16,369 | 11     | 120.01 | 60.36  | 187.92 | 11     |        |    |
|                                | 2005            | 10,551 | 5,820  | 17,002 | 9      | 119.63 | 65.99  | 192.77 | 13     |        |    |
|                                | 2006            | 10,562 | 6,380  | 17,408 | 9      | 117.73 | 71.11  | 194.03 | 15     |        |    |
|                                | 2007            | 10,378 | 6,793  | 17,471 | 9      | 114.12 | 74.69  | 192.10 | 15     |        |    |



| Metropolitan Statistical Area  | PWID Population | Year  | Number      | Min   | Max    | Rank  | Rate   | Min   | Max    | Rank  |        |    |
|--------------------------------|-----------------|-------|-------------|-------|--------|-------|--------|-------|--------|-------|--------|----|
| Seattle--Bellevue--Everett, WA | Young (15-29)   | 1992  | 4,845       | 702   | 9,105  | 24    | 105.80 | 15.34 | 198.83 | 37    |        |    |
|                                |                 | 1993  | 6,442       | 777   | 11,628 | 15    | 140.92 | 17.00 | 254.37 | 20    |        |    |
|                                |                 | 1994  | 4,566       | 858   | 8,010  | 23    | 100.42 | 18.86 | 176.18 | 38    |        |    |
|                                |                 | 1995  | 6,019       | 944   | 10,771 | 14    | 131.61 | 20.64 | 235.50 | 23    |        |    |
|                                |                 | 1996  | 5,855       | 1,049 | 10,372 | 15    | 126.00 | 22.57 | 223.23 | 24    |        |    |
|                                |                 | 1997  | 5,733       | 1,166 | 10,044 | 14    | 119.93 | 24.40 | 210.11 | 29    |        |    |
|                                |                 | 1998  | 5,707       | 1,299 | 9,622  | 15    | 116.67 | 26.55 | 196.71 | 33    |        |    |
|                                |                 | 1999  | 4,453       | 1,416 | 6,789  | 23    | 89.80  | 28.56 | 136.91 | 49    |        |    |
|                                |                 | 2000  | 5,708       | 1,749 | 8,547  | 17    | 114.09 | 34.97 | 170.85 | 35    |        |    |
|                                |                 | 2001  | 5,059       | 2,076 | 8,012  | 20    | 101.20 | 41.52 | 160.25 | 46    |        |    |
|                                |                 | 2002  | 5,858       | 2,376 | 8,488  | 17    | 118.39 | 48.03 | 171.53 | 35    |        |    |
|                                |                 | 2003  | 5,804       | 2,626 | 8,815  | 18    | 118.93 | 53.80 | 180.63 | 37    |        |    |
|                                |                 | 2004  | 5,667       | 2,850 | 8,875  | 19    | 116.91 | 58.80 | 183.06 | 36    |        |    |
|                                |                 | 2005  | 5,481       | 3,024 | 8,833  | 22    | 112.79 | 62.22 | 181.75 | 38    |        |    |
|                                |                 | 2006  | 5,241       | 3,166 | 8,638  | 24    | 106.37 | 64.25 | 175.32 | 42    |        |    |
|                                |                 | 2007  | 4,905       | 3,210 | 8,256  | 25    | 99.25  | 64.96 | 167.08 | 46    |        |    |
|                                |                 |       | Old (30-64) | 1992  | 13,406 | 1,943 | 25,194 | 25    | 133.36 | 19.33 | 250.64 | 44 |
|                                |                 |       |             | 1993  | 17,326 | 2,090 | 31,274 | 15    | 167.03 | 20.15 | 301.51 | 27 |
|                                |                 |       |             | 1994  | 12,127 | 2,278 | 21,277 | 28    | 114.34 | 21.48 | 200.62 | 46 |
|                                |                 |       |             | 1995  | 16,042 | 2,516 | 28,706 | 15    | 148.00 | 23.21 | 264.83 | 33 |
| 1996                           | 15,859          |       |             | 2,841 | 28,097 | 15    | 143.62 | 25.73 | 254.45 | 33    |        |    |
| 1997                           | 15,923          |       |             | 3,239 | 27,896 | 15    | 140.32 | 28.55 | 245.83 | 33    |        |    |
| 1998                           | 16,331          |       |             | 3,716 | 27,535 | 15    | 140.74 | 32.03 | 237.29 | 31    |        |    |
| 1999                           | 13,154          |       |             | 4,184 | 20,055 | 22    | 111.81 | 35.56 | 170.47 | 47    |        |    |
| 2000                           | 17,401          |       |             | 5,333 | 26,057 | 15    | 146.05 | 44.76 | 218.71 | 23    |        |    |
| 2001                           | 15,897          |       |             | 6,522 | 25,174 | 17    | 130.22 | 53.43 | 206.21 | 32    |        |    |
| 2002                           | 18,919          |       |             | 7,675 | 27,412 | 14    | 152.37 | 61.81 | 220.76 | 17    |        |    |
| 2003                           | 19,161          |       |             | 8,668 | 29,101 | 12    | 152.42 | 68.95 | 231.49 | 14    |        |    |
| 2004                           | 18,910          |       |             | 9,511 | 29,611 | 13    | 148.10 | 74.49 | 231.91 | 14    |        |    |
| 2005                           | 18,058          |       |             | 9,961 | 29,099 | 13    | 138.98 | 76.66 | 223.95 | 14    |        |    |
| 2006                           | 16,263          | 9,824 | 26,804      | 15    | 122.76 | 74.15 | 202.32 | 21    |        |       |        |    |
| 2007                           | 13,132          | 8,595 | 22,106      | 20    | 97.46  | 63.79 | 164.05 | 34    |        |       |        |    |

| Metropolitan Statistical Area | PWID Population | Year  | Number             | Min   | Max    | Rank  | Rate   | Min    | Max    | Rank  |        |    |
|-------------------------------|-----------------|-------|--------------------|-------|--------|-------|--------|--------|--------|-------|--------|----|
| Springfield, MA               | Total           | 1992  | 5,502              | 4,144 | 6,793  | 73    | 140.02 | 105.45 | 172.86 | 39    |        |    |
|                               |                 | 1993  | 6,307              | 4,276 | 8,164  | 63    | 161.02 | 109.15 | 208.42 | 25    |        |    |
|                               |                 | 1994  | 5,903              | 4,454 | 7,144  | 70    | 150.66 | 113.68 | 182.33 | 30    |        |    |
|                               |                 | 1995  | 6,969              | 4,680 | 9,454  | 58    | 177.70 | 119.34 | 241.07 | 15    |        |    |
|                               |                 | 1996  | 7,296              | 4,929 | 10,040 | 55    | 186.03 | 125.68 | 256.01 | 11    |        |    |
|                               |                 | 1997  | 7,771              | 5,670 | 10,625 | 48    | 196.97 | 143.73 | 269.30 | 8     |        |    |
|                               |                 | 1998  | 8,234              | 6,427 | 11,199 | 47    | 207.76 | 162.17 | 282.58 | 7     |        |    |
|                               |                 | 1999  | 7,639              | 7,026 | 8,038  | 55    | 191.40 | 176.05 | 201.40 | 9     |        |    |
|                               |                 | 2000  | 8,998              | 7,352 | 12,394 | 44    | 223.92 | 182.96 | 308.44 | 6     |        |    |
|                               |                 | 2001  | 7,974              | 7,331 | 8,718  | 50    | 197.45 | 181.52 | 215.89 | 7     |        |    |
|                               |                 | 2002  | 9,327              | 7,355 | 13,106 | 43    | 228.23 | 179.97 | 320.69 | 6     |        |    |
|                               |                 | 2003  | 9,595              | 7,321 | 13,498 | 42    | 232.32 | 177.25 | 326.82 | 5     |        |    |
|                               |                 | 2004  | 9,978              | 6,990 | 13,869 | 42    | 239.82 | 168.01 | 333.35 | 5     |        |    |
|                               |                 | 2005  | 10,371             | 6,656 | 14,220 | 40    | 247.39 | 158.78 | 339.22 | 4     |        |    |
|                               |                 | 2006  | 10,771             | 6,277 | 14,569 | 40    | 255.13 | 148.68 | 345.08 | 3     |        |    |
|                               |                 | 2007  | 11,149             | 5,873 | 14,877 | 40    | 263.06 | 138.58 | 351.04 | 3     |        |    |
|                               |                 |       | Non-Hispanic White | 1992  | 2,499  | 1,882 | 3,084  | 75     | 75.73  | 57.03 | 93.49  | 49 |
|                               |                 |       |                    | 1993  | 2,750  | 1,864 | 3,559  | 71     | 84.12  | 57.02 | 108.88 | 42 |
|                               |                 |       |                    | 1994  | 2,485  | 1,875 | 3,008  | 75     | 76.42  | 57.66 | 92.48  | 49 |
|                               |                 |       |                    | 1995  | 2,850  | 1,914 | 3,866  | 69     | 88.03  | 59.12 | 119.43 | 44 |
| 1996                          | 2,914           |       |                    | 1,968 | 4,010  | 69    | 90.58  | 61.20  | 124.65 | 44    |        |    |
| 1997                          | 3,046           |       |                    | 2,223 | 4,165  | 68    | 94.82  | 69.19  | 129.64 | 38    |        |    |
| 1998                          | 3,182           |       |                    | 2,484 | 4,329  | 67    | 99.31  | 77.52  | 135.07 | 36    |        |    |
| 1999                          | 2,923           |       |                    | 2,689 | 3,076  | 75    | 91.18  | 83.87  | 95.94  | 36    |        |    |
| 2000                          | 3,422           |       |                    | 2,796 | 4,714  | 61    | 106.80 | 87.26  | 147.11 | 28    |        |    |
| 2001                          | 3,023           |       |                    | 2,780 | 3,306  | 74    | 94.42  | 86.80  | 103.23 | 37    |        |    |
| 2002                          | 3,536           |       |                    | 2,788 | 4,968  | 61    | 109.71 | 86.52  | 154.16 | 25    |        |    |
| 2003                          | 3,644           |       |                    | 2,780 | 5,127  | 59    | 112.45 | 85.79  | 158.19 | 25    |        |    |
| 2004                          | 3,803           |       |                    | 2,665 | 5,287  | 61    | 117.10 | 82.04  | 162.78 | 20    |        |    |
| 2005                          | 3,972           |       |                    | 2,549 | 5,446  | 57    | 122.04 | 78.32  | 167.33 | 18    |        |    |
| 2006                          | 4,148           | 2,417 | 5,610              | 58    | 127.35 | 74.22 | 172.25 | 16     |        |       |        |    |
| 2007                          | 4,318           | 2,275 | 5,762              | 56    | 132.82 | 69.97 | 177.23 | 14     |        |       |        |    |

| Metropolitan Statistical Area | PWID Population    | Year  | Number   | Min   | Max    | Rank   | Rate   | Min    | Max     | Rank   |         |   |
|-------------------------------|--------------------|-------|----------|-------|--------|--------|--------|--------|---------|--------|---------|---|
| Springfield, MA               | Non-Hispanic Black | 1992  | 843      | 635   | 1,040  | 83     | 360.81 | 271.73 | 445.42  | 35     |         |   |
|                               |                    | 1993  | 950      | 644   | 1,230  | 76     | 405.49 | 274.87 | 524.86  | 22     |         |   |
|                               |                    | 1994  | 844      | 637   | 1,022  | 81     | 357.91 | 270.06 | 433.13  | 28     |         |   |
|                               |                    | 1995  | 919      | 617   | 1,247  | 74     | 390.14 | 262.02 | 529.28  | 15     |         |   |
|                               |                    | 1996  | 869      | 587   | 1,195  | 72     | 366.01 | 247.27 | 503.69  | 16     |         |   |
|                               |                    | 1997  | 823      | 600   | 1,125  | 72     | 338.92 | 247.31 | 463.37  | 19     |         |   |
|                               |                    | 1998  | 771      | 601   | 1,048  | 74     | 313.26 | 244.52 | 426.07  | 18     |         |   |
|                               |                    | 1999  | 633      | 582   | 666    | 82     | 253.80 | 233.45 | 267.06  | 26     |         |   |
|                               |                    | 2000  | 668      | 546   | 920    | 76     | 262.51 | 214.49 | 361.60  | 21     |         |   |
|                               |                    | 2001  | 541      | 497   | 591    | 82     | 209.59 | 192.68 | 229.16  | 35     |         |   |
|                               |                    | 2002  | 595      | 469   | 836    | 76     | 227.15 | 179.12 | 319.18  | 24     |         |   |
|                               |                    | 2003  | 599      | 457   | 843    | 76     | 225.28 | 171.88 | 316.91  | 24     |         |   |
|                               |                    | 2004  | 639      | 448   | 889    | 75     | 237.83 | 166.62 | 330.59  | 20     |         |   |
|                               |                    | 2005  | 722      | 463   | 990    | 73     | 264.50 | 169.76 | 362.67  | 16     |         |   |
|                               |                    | 2006  | 869      | 507   | 1,176  | 70     | 315.00 | 183.57 | 426.05  | 13     |         |   |
|                               |                    | 2007  | 1,120    | 590   | 1,495  | 62     | 402.59 | 212.08 | 537.23  | 11     |         |   |
|                               |                    |       | Hispanic | 1992  | 2,016  | 1,518  | 2,488  | 33     | 626.96  | 472.16 | 773.98  | 4 |
|                               |                    |       |          | 1993  | 2,439  | 1,653  | 3,157  | 31     | 727.24  | 492.97 | 941.32  | 3 |
|                               |                    |       |          | 1994  | 2,371  | 1,789  | 2,870  | 29     | 680.47  | 513.44 | 823.48  | 4 |
|                               |                    |       |          | 1995  | 2,870  | 1,927  | 3,893  | 28     | 788.69  | 529.67 | 1069.94 | 3 |
| 1996                          | 3,045              |       |          | 2,057 | 4,190  | 25     | 801.04 | 541.17 | 1102.36 | 3      |         |   |
| 1997                          | 3,256              |       |          | 2,376 | 4,452  | 24     | 815.86 | 595.33 | 1115.45 | 1      |         |   |
| 1998                          | 3,436              |       |          | 2,682 | 4,673  | 22     | 820.37 | 640.36 | 1115.81 | 1      |         |   |
| 1999                          | 3,153              |       |          | 2,900 | 3,318  | 23     | 719.08 | 661.42 | 756.65  | 3      |         |   |
| 2000                          | 3,655              |       |          | 2,986 | 5,034  | 18     | 797.33 | 651.48 | 1098.31 | 1      |         |   |
| 2001                          | 3,174              |       |          | 2,918 | 3,470  | 23     | 669.13 | 615.16 | 731.61  | 3      |         |   |
| 2002                          | 3,628              |       |          | 2,861 | 5,098  | 19     | 734.02 | 578.82 | 1031.40 | 1      |         |   |
| 2003                          | 3,643              |       |          | 2,779 | 5,124  | 18     | 710.68 | 542.22 | 999.76  | 1      |         |   |
| 2004                          | 3,698              |       |          | 2,591 | 5,140  | 19     | 696.80 | 488.16 | 968.55  | 1      |         |   |
| 2005                          | 3,759              |       |          | 2,413 | 5,155  | 19     | 683.64 | 438.76 | 937.38  | 1      |         |   |
| 2006                          | 3,834              |       |          | 2,234 | 5,186  | 18     | 669.82 | 390.34 | 905.97  | 1      |         |   |
| 2007                          | 3,920              | 2,065 | 5,232    | 19    | 661.90 | 348.69 | 883.26 | 1      |         |        |         |   |

| Metropolitan Statistical Area | PWID Population | Year   | Number | Min    | Max    | Rank   | Rate   | Min    | Max    | Rank   |    |
|-------------------------------|-----------------|--------|--------|--------|--------|--------|--------|--------|--------|--------|----|
| Springfield, MA               | Male            | 1992   | 4,009  | 3,019  | 4,950  | 69     | 211.55 | 159.32 | 261.16 | 28     |    |
|                               |                 | 1993   | 4,535  | 3,074  | 5,869  | 57     | 240.04 | 162.71 | 310.70 | 18     |    |
|                               |                 | 1994   | 4,211  | 3,177  | 5,096  | 66     | 222.72 | 168.05 | 269.53 | 22     |    |
|                               |                 | 1995   | 4,956  | 3,328  | 6,723  | 51     | 261.99 | 175.95 | 355.41 | 9      |    |
|                               |                 | 1996   | 5,195  | 3,509  | 7,149  | 46     | 274.69 | 185.58 | 378.01 | 8      |    |
|                               |                 | 1997   | 5,558  | 4,056  | 7,599  | 44     | 292.11 | 213.15 | 399.38 | 5      |    |
|                               |                 | 1998   | 5,929  | 4,628  | 8,065  | 41     | 310.22 | 242.15 | 421.93 | 5      |    |
|                               |                 | 1999   | 5,546  | 5,101  | 5,836  | 47     | 288.13 | 265.03 | 303.19 | 7      |    |
|                               |                 | 2000   | 6,588  | 5,383  | 9,075  | 38     | 339.92 | 277.75 | 468.24 | 2      |    |
|                               |                 | 2001   | 5,886  | 5,411  | 6,436  | 46     | 301.80 | 277.46 | 329.98 | 6      |    |
|                               |                 | 2002   | 6,933  | 5,467  | 9,741  | 37     | 350.59 | 276.47 | 492.63 | 2      |    |
|                               |                 | 2003   | 7,166  | 5,468  | 10,081 | 37     | 358.21 | 273.30 | 503.92 | 2      |    |
|                               |                 | 2004   | 7,469  | 5,232  | 10,382 | 37     | 370.54 | 259.59 | 515.05 | 2      |    |
|                               |                 | 2005   | 7,753  | 4,976  | 10,631 | 37     | 381.66 | 244.95 | 523.31 | 2      |    |
|                               | 2006            | 8,009  | 4,667  | 10,833 | 36     | 390.75 | 227.71 | 528.51 | 2      |        |    |
|                               | 2007            | 8,202  | 4,321  | 10,945 | 33     | 398.50 | 209.93 | 531.76 | 1      |        |    |
|                               |                 | Female | 1992   | 1,454  | 1,095  | 1,795  | 80     | 71.48  | 53.83  | 88.24  | 48 |
|                               |                 |        | 1993   | 1,747  | 1,184  | 2,262  | 74     | 86.15  | 58.40  | 111.52 | 35 |
|                               |                 |        | 1994   | 1,686  | 1,272  | 2,041  | 78     | 83.16  | 62.75  | 100.64 | 40 |
|                               |                 |        | 1995   | 2,024  | 1,359  | 2,746  | 68     | 99.72  | 66.97  | 135.28 | 26 |
|                               |                 |        | 1996   | 2,131  | 1,439  | 2,932  | 66     | 104.92 | 70.88  | 144.39 | 21 |
|                               |                 |        | 1997   | 2,260  | 1,649  | 3,090  | 63     | 110.64 | 80.73  | 151.27 | 15 |
|                               |                 |        | 1998   | 2,367  | 1,847  | 3,219  | 61     | 115.35 | 90.04  | 156.89 | 14 |
|                               |                 |        | 1999   | 2,158  | 1,985  | 2,271  | 69     | 104.44 | 96.06  | 109.89 | 21 |
|                               |                 |        | 2000   | 2,489  | 2,034  | 3,429  | 59     | 119.66 | 97.78  | 164.84 | 13 |
|                               |                 |        | 2001   | 2,156  | 1,982  | 2,358  | 71     | 103.27 | 94.94  | 112.91 | 23 |
|                               |                 |        | 2002   | 2,466  | 1,945  | 3,466  | 64     | 116.92 | 92.20  | 164.29 | 14 |
|                               |                 |        | 2003   | 2,487  | 1,897  | 3,498  | 63     | 116.77 | 89.09  | 164.27 | 14 |
|                               | 2004            |        | 2,546  | 1,784  | 3,539  | 61     | 118.71 | 83.16  | 165.00 | 12     |    |
|                               | 2005            |        | 2,623  | 1,684  | 3,597  | 59     | 121.43 | 77.93  | 166.50 | 11     |    |
|                               | 2006            | 2,726  | 1,588  | 3,687  | 56     | 125.49 | 73.13  | 169.73 | 11     |        |    |
|                               | 2007            | 2,855  | 1,504  | 3,809  | 54     | 130.95 | 68.98  | 174.74 | 9      |        |    |

| Metropolitan Statistical Area | PWID Population | Year  | Number      | Min   | Max    | Rank   | Rate   | Min    | Max    | Rank   |        |    |
|-------------------------------|-----------------|-------|-------------|-------|--------|--------|--------|--------|--------|--------|--------|----|
| Springfield, MA               | Young (15-29)   | 1992  | 1,653       | 1,245 | 2,040  | 68     | 113.63 | 85.57  | 140.27 | 32     |        |    |
|                               |                 | 1993  | 1,924       | 1,304 | 2,490  | 51     | 135.55 | 91.88  | 175.45 | 22     |        |    |
|                               |                 | 1994  | 1,840       | 1,389 | 2,227  | 59     | 132.15 | 99.71  | 159.92 | 22     |        |    |
|                               |                 | 1995  | 2,231       | 1,498 | 3,027  | 45     | 162.93 | 109.42 | 221.03 | 9      |        |    |
|                               |                 | 1996  | 2,406       | 1,626 | 3,312  | 44     | 178.63 | 120.68 | 245.82 | 7      |        |    |
|                               |                 | 1997  | 2,644       | 1,930 | 3,616  | 36     | 197.81 | 144.34 | 270.44 | 3      |        |    |
|                               |                 | 1998  | 2,891       | 2,256 | 3,932  | 34     | 217.11 | 169.47 | 295.30 | 2      |        |    |
|                               |                 | 1999  | 2,762       | 2,540 | 2,906  | 43     | 208.27 | 191.57 | 219.15 | 6      |        |    |
|                               |                 | 2000  | 3,340       | 2,729 | 4,601  | 35     | 251.78 | 205.72 | 346.82 | 2      |        |    |
|                               |                 | 2001  | 3,026       | 2,782 | 3,309  | 42     | 227.22 | 208.89 | 248.44 | 6      |        |    |
|                               |                 | 2002  | 3,598       | 2,838 | 5,056  | 33     | 264.87 | 208.87 | 372.18 | 3      |        |    |
|                               |                 | 2003  | 3,737       | 2,851 | 5,257  | 33     | 268.30 | 204.70 | 377.44 | 3      |        |    |
|                               |                 | 2004  | 3,890       | 2,725 | 5,407  | 34     | 272.99 | 191.25 | 379.46 | 3      |        |    |
|                               |                 | 2005  | 4,009       | 2,573 | 5,497  | 34     | 275.17 | 176.60 | 377.30 | 2      |        |    |
|                               |                 | 2006  | 4,082       | 2,379 | 5,521  | 33     | 274.38 | 159.90 | 371.12 | 3      |        |    |
|                               |                 | 2007  | 4,090       | 2,155 | 5,458  | 34     | 271.38 | 142.96 | 362.13 | 5      |        |    |
|                               |                 |       | Old (30-64) | 1992  | 3,958  | 2,981  | 4,887  | 74     | 159.94 | 120.45 | 197.44 | 37 |
|                               |                 |       |             | 1993  | 4,455  | 3,020  | 5,767  | 65     | 178.36 | 120.90 | 230.86 | 24 |
|                               |                 |       |             | 1994  | 4,104  | 3,097  | 4,967  | 75     | 162.50 | 122.61 | 196.65 | 34 |
|                               |                 |       |             | 1995  | 4,779  | 3,210  | 6,484  | 63     | 187.26 | 125.76 | 254.04 | 20 |
| 1996                          | 4,945           |       |             | 3,341 | 6,805  | 61     | 192.07 | 129.76 | 264.32 | 15     |        |    |
| 1997                          | 5,212           |       |             | 3,803 | 7,126  | 57     | 199.81 | 145.80 | 273.19 | 9      |        |    |
| 1998                          | 5,468           |       |             | 4,268 | 7,437  | 55     | 207.76 | 162.17 | 282.59 | 8      |        |    |
| 1999                          | 5,022           |       |             | 4,620 | 5,285  | 60     | 188.47 | 173.36 | 198.32 | 9      |        |    |
| 2000                          | 5,854           |       |             | 4,783 | 8,064  | 46     | 217.50 | 177.72 | 299.61 | 7      |        |    |
| 2001                          | 5,128           |       |             | 4,714 | 5,607  | 56     | 189.47 | 174.18 | 207.16 | 8      |        |    |
| 2002                          | 5,919           |       |             | 4,667 | 8,316  | 45     | 216.93 | 171.06 | 304.81 | 7      |        |    |
| 2003                          | 5,993           |       |             | 4,572 | 8,431  | 44     | 218.92 | 167.03 | 307.97 | 6      |        |    |
| 2004                          | 6,115           |       |             | 4,284 | 8,499  | 43     | 223.52 | 156.59 | 310.69 | 6      |        |    |
| 2005                          | 6,209           |       |             | 3,985 | 8,514  | 42     | 227.03 | 145.70 | 311.29 | 6      |        |    |
| 2006                          | 6,267           | 3,652 | 8,476       | 39    | 229.22 | 133.58 | 310.03 | 6      |        |        |        |    |
| 2007                          | 6,259           | 3,297 | 8,352       | 37    | 229.19 | 120.73 | 305.83 | 6      |        |        |        |    |

| Metropolitan Statistical Area | PWID Population | Year | Number             | Min   | Max    | Rank  | Rate   | Min    | Max    | Rank   |        |    |
|-------------------------------|-----------------|------|--------------------|-------|--------|-------|--------|--------|--------|--------|--------|----|
| Stockton--Lodi, CA            | Total           | 1992 | 7,355              | 5,576 | 10,254 | 58    | 235.41 | 178.46 | 328.21 | 10     |        |    |
|                               |                 | 1993 | 7,789              | 6,121 | 9,220  | 52    | 247.49 | 194.51 | 292.98 | 5      |        |    |
|                               |                 | 1994 | 7,294              | 6,678 | 7,711  | 60    | 230.15 | 210.70 | 243.29 | 7      |        |    |
|                               |                 | 1995 | 7,819              | 6,495 | 9,325  | 48    | 244.42 | 203.04 | 291.50 | 4      |        |    |
|                               |                 | 1996 | 7,906              | 5,457 | 9,324  | 47    | 244.23 | 168.59 | 288.04 | 4      |        |    |
|                               |                 | 1997 | 8,316              | 5,382 | 9,661  | 46    | 251.34 | 162.67 | 291.98 | 3      |        |    |
|                               |                 | 1998 | 8,833              | 5,564 | 10,511 | 44    | 260.67 | 164.18 | 310.16 | 4      |        |    |
|                               |                 | 1999 | 9,348              | 5,653 | 11,469 | 45    | 267.61 | 161.85 | 328.35 | 3      |        |    |
|                               |                 | 2000 | 9,915              | 5,522 | 12,451 | 40    | 274.23 | 152.71 | 344.35 | 2      |        |    |
|                               |                 | 2001 | 10,899             | 5,127 | 13,893 | 39    | 287.19 | 135.11 | 366.10 | 3      |        |    |
|                               |                 | 2002 | 10,773             | 4,313 | 15,586 | 40    | 273.82 | 109.63 | 396.17 | 2      |        |    |
|                               |                 | 2003 | 11,145             | 3,436 | 17,453 | 38    | 273.75 | 84.39  | 428.71 | 2      |        |    |
|                               |                 | 2004 | 11,679             | 3,155 | 19,474 | 38    | 278.21 | 75.16  | 463.92 | 2      |        |    |
|                               |                 | 2005 | 12,234             | 2,872 | 21,659 | 35    | 283.57 | 66.57  | 502.02 | 2      |        |    |
|                               |                 | 2006 | 12,645             | 2,577 | 23,704 | 34    | 289.48 | 58.99  | 542.65 | 2      |        |    |
|                               |                 | 2007 | 13,053             | 2,314 | 25,752 | 33    | 295.81 | 52.44  | 583.59 | 2      |        |    |
|                               |                 |      | Non-Hispanic White | 1992  | 3,674  | 2,785 | 5,123  | 63     | 203.47 | 154.24 | 283.68 | 11 |
|                               |                 |      |                    | 1993  | 3,819  | 3,001 | 4,520  | 58     | 214.88 | 168.89 | 254.38 | 4  |
|                               |                 |      |                    | 1994  | 3,534  | 3,235 | 3,736  | 64     | 201.70 | 184.65 | 213.22 | 7  |
|                               |                 |      |                    | 1995  | 3,762  | 3,125 | 4,487  | 57     | 217.03 | 180.28 | 258.83 | 4  |
| 1996                          | 3,790           |      |                    | 2,616 | 4,470  | 58    | 220.13 | 151.96 | 259.62 | 4      |        |    |
| 1997                          | 3,977           |      |                    | 2,574 | 4,620  | 49    | 229.69 | 148.66 | 266.83 | 4      |        |    |
| 1998                          | 4,210           |      |                    | 2,652 | 5,010  | 48    | 240.93 | 151.75 | 286.67 | 3      |        |    |
| 1999                          | 4,430           |      |                    | 2,679 | 5,435  | 47    | 249.60 | 150.95 | 306.24 | 2      |        |    |
| 2000                          | 4,651           |      |                    | 2,590 | 5,840  | 41    | 257.12 | 143.19 | 322.87 | 2      |        |    |
| 2001                          | 5,027           |      |                    | 2,365 | 6,409  | 41    | 271.82 | 127.88 | 346.50 | 2      |        |    |
| 2002                          | 4,846           |      |                    | 1,940 | 7,011  | 41    | 260.57 | 104.32 | 376.99 | 2      |        |    |
| 2003                          | 4,836           |      |                    | 1,491 | 7,574  | 42    | 258.27 | 79.62  | 404.46 | 2      |        |    |
| 2004                          | 4,824           |      |                    | 1,303 | 8,043  | 43    | 256.29 | 69.24  | 427.36 | 2      |        |    |
| 2005                          | 4,732           |      |                    | 1,111 | 8,377  | 43    | 251.33 | 59.00  | 444.93 | 2      |        |    |
| 2006                          | 4,489           |      |                    | 915   | 8,415  | 53    | 241.92 | 49.30  | 453.51 | 3      |        |    |
| 2007                          | 4,154           | 737  | 8,196              | 59    | 226.51 | 40.16 | 446.87 | 4      |        |        |        |    |

| Metropolitan Statistical Area | PWID Population    | Year     | Number | Min   | Max    | Rank   | Rate   | Min     | Max     | Rank   |    |
|-------------------------------|--------------------|----------|--------|-------|--------|--------|--------|---------|---------|--------|----|
| Stockton--Lodi, CA            | Non-Hispanic Black | 1992     | 1,142  | 866   | 1,593  | 73     | 669.93 | 507.86  | 934.01  | 6      |    |
|                               |                    | 1993     | 1,276  | 1,003 | 1,510  | 64     | 713.61 | 560.86  | 844.77  | 6      |    |
|                               |                    | 1994     | 1,236  | 1,132 | 1,307  | 66     | 668.49 | 611.98  | 706.66  | 4      |    |
|                               |                    | 1995     | 1,350  | 1,122 | 1,610  | 63     | 699.39 | 580.98  | 834.11  | 4      |    |
|                               |                    | 1996     | 1,376  | 950   | 1,622  | 62     | 685.20 | 473.00  | 808.12  | 4      |    |
|                               |                    | 1997     | 1,447  | 936   | 1,681  | 59     | 685.07 | 443.38  | 795.83  | 2      |    |
|                               |                    | 1998     | 1,530  | 964   | 1,821  | 57     | 691.53 | 435.56  | 822.83  | 2      |    |
|                               |                    | 1999     | 1,611  | 975   | 1,977  | 53     | 690.26 | 417.46  | 846.92  | 2      |    |
|                               |                    | 2000     | 1,706  | 950   | 2,142  | 47     | 694.48 | 386.75  | 872.07  | 2      |    |
|                               |                    | 2001     | 1,884  | 886   | 2,401  | 44     | 708.30 | 333.22  | 902.92  | 2      |    |
|                               |                    | 2002     | 1,889  | 756   | 2,734  | 39     | 667.67 | 267.32  | 966.01  | 2      |    |
|                               |                    | 2003     | 2,010  | 620   | 3,148  | 34     | 672.76 | 207.40  | 1053.58 | 2      |    |
|                               |                    | 2004     | 2,202  | 595   | 3,673  | 33     | 705.58 | 190.61  | 1176.56 | 3      |    |
|                               |                    | 2005     | 2,460  | 578   | 4,356  | 28     | 750.86 | 176.26  | 1329.28 | 3      |    |
|                               |                    | 2006     | 2,772  | 565   | 5,196  | 26     | 816.30 | 166.34  | 1530.24 | 3      |    |
|                               | 2007               | 3,190    | 566    | 6,294 | 25     | 911.15 | 161.53 | 1797.57 | 3       |        |    |
|                               |                    | Hispanic | 1992   | 2,262 | 1,715  | 3,153  | 31     | 290.29  | 220.07  | 404.73 | 19 |
|                               |                    |          | 1993   | 2,204 | 1,732  | 2,609  | 32     | 271.96  | 213.74  | 321.94 | 20 |
|                               |                    |          | 1994   | 1,922 | 1,760  | 2,032  | 35     | 228.82  | 209.48  | 241.89 | 24 |
|                               |                    |          | 1995   | 1,943 | 1,614  | 2,317  | 33     | 223.62  | 185.76  | 266.69 | 22 |
|                               |                    |          | 1996   | 1,877 | 1,295  | 2,213  | 33     | 208.20  | 143.72  | 245.55 | 21 |
| 1997                          |                    |          | 1,910  | 1,236 | 2,218  | 33     | 203.05 | 131.41  | 235.88  | 20     |    |
| 1998                          |                    |          | 1,987  | 1,252 | 2,365  | 33     | 202.50 | 127.54  | 240.94  | 18     |    |
| 1999                          |                    |          | 2,086  | 1,261 | 2,559  | 34     | 202.52 | 122.48  | 248.48  | 19     |    |
| 2000                          |                    |          | 2,219  | 1,236 | 2,787  | 31     | 204.39 | 113.82  | 256.66  | 18     |    |
| 2001                          |                    |          | 2,475  | 1,165 | 3,156  | 29     | 211.91 | 99.69   | 270.13  | 17     |    |
| 2002                          |                    |          | 2,509  | 1,005 | 3,631  | 26     | 201.60 | 80.72   | 291.68  | 17     |    |
| 2003                          |                    |          | 2,690  | 829   | 4,212  | 26     | 204.16 | 62.94   | 319.72  | 17     |    |
| 2004                          |                    |          | 2,949  | 797   | 4,917  | 25     | 212.52 | 57.41   | 354.38  | 17     |    |
| 2005                          |                    |          | 3,262  | 766   | 5,775  | 22     | 224.25 | 52.64   | 397.01  | 15     |    |
| 2006                          |                    |          | 3,591  | 732   | 6,732  | 21     | 238.96 | 48.69   | 447.95  | 15     |    |
| 2007                          | 3,980              | 706      | 7,852  | 17    | 257.31 | 45.62  | 507.63 | 15      |         |        |    |

| Metropolitan Statistical Area | PWID Population | Year   | Number | Min    | Max    | Rank   | Rate   | Min    | Max    | Rank   |   |
|-------------------------------|-----------------|--------|--------|--------|--------|--------|--------|--------|--------|--------|---|
| Stockton--Lodi, CA            | Male            | 1992   | 4,707  | 3,568  | 6,563  | 59     | 293.01 | 222.13 | 408.52 | 14     |   |
|                               |                 | 1993   | 4,855  | 3,816  | 5,748  | 53     | 299.98 | 235.77 | 355.12 | 7      |   |
|                               |                 | 1994   | 4,445  | 4,070  | 4,699  | 62     | 273.57 | 250.45 | 289.20 | 14     |   |
|                               |                 | 1995   | 4,677  | 3,885  | 5,578  | 54     | 285.39 | 237.07 | 340.37 | 6      |   |
|                               |                 | 1996   | 4,662  | 3,218  | 5,498  | 55     | 281.63 | 194.41 | 332.15 | 6      |   |
|                               |                 | 1997   | 4,855  | 3,142  | 5,640  | 52     | 287.36 | 185.98 | 333.82 | 6      |   |
|                               |                 | 1998   | 5,128  | 3,230  | 6,102  | 47     | 297.06 | 187.10 | 353.46 | 6      |   |
|                               |                 | 1999   | 5,421  | 3,279  | 6,651  | 48     | 305.32 | 184.65 | 374.62 | 5      |   |
|                               |                 | 2000   | 5,768  | 3,212  | 7,243  | 41     | 313.99 | 174.85 | 394.28 | 5      |   |
|                               |                 | 2001   | 6,386  | 3,004  | 8,141  | 40     | 331.23 | 155.83 | 422.25 | 3      |   |
|                               |                 | 2002   | 6,383  | 2,555  | 9,234  | 40     | 319.40 | 127.88 | 462.12 | 4      |   |
|                               |                 | 2003   | 6,699  | 2,065  | 10,492 | 39     | 324.29 | 99.97  | 507.86 | 4      |   |
|                               |                 | 2004   | 7,145  | 1,930  | 11,914 | 39     | 336.10 | 90.80  | 560.44 | 4      |   |
|                               |                 | 2005   | 7,638  | 1,793  | 13,522 | 39     | 349.03 | 81.94  | 617.91 | 3      |   |
|                               | 2006            | 8,074  | 1,645  | 15,135 | 35     | 364.39 | 74.25  | 683.08 | 3      |        |   |
|                               | 2007            | 8,540  | 1,514  | 16,848 | 31     | 381.36 | 67.61  | 752.37 | 3      |        |   |
|                               |                 | Female | 1992   | 2,704  | 2,050  | 3,769  | 57     | 178.12 | 135.03 | 248.34 | 5 |
|                               |                 |        | 1993   | 2,981  | 2,343  | 3,528  | 45     | 195.01 | 153.27 | 230.85 | 4 |
|                               |                 |        | 1994   | 2,889  | 2,645  | 3,054  | 52     | 187.09 | 171.27 | 197.77 | 2 |
|                               |                 |        | 1995   | 3,187  | 2,648  | 3,801  | 43     | 204.30 | 169.71 | 243.65 | 3 |
|                               |                 |        | 1996   | 3,298  | 2,276  | 3,889  | 41     | 208.46 | 143.90 | 245.86 | 3 |
|                               |                 |        | 1997   | 3,529  | 2,284  | 4,099  | 40     | 217.93 | 141.04 | 253.16 | 2 |
|                               |                 |        | 1998   | 3,791  | 2,388  | 4,511  | 37     | 228.06 | 143.64 | 271.36 | 2 |
|                               |                 |        | 1999   | 4,034  | 2,440  | 4,949  | 38     | 234.85 | 142.03 | 288.15 | 2 |
|                               |                 |        | 2000   | 4,276  | 2,381  | 5,369  | 36     | 240.39 | 133.87 | 301.86 | 2 |
|                               |                 |        | 2001   | 4,667  | 2,195  | 5,949  | 36     | 249.97 | 117.60 | 318.65 | 2 |
|                               | 2002            |        | 4,549  | 1,821  | 6,582  | 34     | 234.99 | 94.08  | 339.99 | 2      |   |
|                               | 2003            |        | 4,608  | 1,421  | 7,217  | 33     | 229.80 | 70.84  | 359.87 | 2      |   |
|                               | 2004            | 4,691  | 1,267  | 7,822  | 33     | 226.41 | 61.16  | 377.53 | 2      |        |   |
|                               | 2005            | 4,733  | 1,111  | 8,379  | 32     | 222.62 | 52.26  | 394.12 | 2      |        |   |
|                               | 2006            | 4,668  | 951    | 8,750  | 35     | 216.85 | 44.19  | 406.51 | 2      |        |   |
|                               | 2007            | 4,550  | 807    | 8,977  | 35     | 209.34 | 37.11  | 412.99 | 2      |        |   |



| Metropolitan Statistical Area | PWID Population | Year  | Number      | Min   | Max    | Rank  | Rate   | Min    | Max    | Rank   |        |   |
|-------------------------------|-----------------|-------|-------------|-------|--------|-------|--------|--------|--------|--------|--------|---|
| Stockton--Lodi, CA            | Young (15-29)   | 1992  | 1,808       | 1,371 | 2,521  | 63    | 164.87 | 124.98 | 229.86 | 15     |        |   |
|                               |                 | 1993  | 1,715       | 1,348 | 2,030  | 58    | 157.53 | 123.81 | 186.48 | 13     |        |   |
|                               |                 | 1994  | 1,477       | 1,353 | 1,562  | 72    | 136.84 | 125.27 | 144.65 | 19     |        |   |
|                               |                 | 1995  | 1,492       | 1,240 | 1,780  | 68    | 137.69 | 114.38 | 164.22 | 18     |        |   |
|                               |                 | 1996  | 1,449       | 1,001 | 1,709  | 69    | 132.54 | 91.49  | 156.31 | 21     |        |   |
|                               |                 | 1997  | 1,486       | 961   | 1,726  | 68    | 132.87 | 86.00  | 154.36 | 20     |        |   |
|                               |                 | 1998  | 1,551       | 977   | 1,846  | 69    | 135.36 | 85.25  | 161.06 | 21     |        |   |
|                               |                 | 1999  | 1,620       | 979   | 1,987  | 72    | 136.93 | 82.81  | 168.00 | 23     |        |   |
|                               |                 | 2000  | 1,691       | 942   | 2,123  | 68    | 137.85 | 76.77  | 173.10 | 22     |        |   |
|                               |                 | 2001  | 1,815       | 854   | 2,313  | 71    | 139.29 | 65.53  | 177.56 | 26     |        |   |
|                               |                 | 2002  | 1,727       | 692   | 2,499  | 74    | 126.44 | 50.62  | 182.94 | 27     |        |   |
|                               |                 | 2003  | 1,687       | 520   | 2,642  | 75    | 118.08 | 36.40  | 184.92 | 38     |        |   |
|                               |                 | 2004  | 1,626       | 439   | 2,712  | 76    | 109.29 | 29.53  | 182.24 | 43     |        |   |
|                               |                 | 2005  | 1,516       | 356   | 2,684  | 81    | 98.20  | 23.05  | 173.84 | 53     |        |   |
|                               |                 | 2006  | 1,339       | 273   | 2,511  | 87    | 85.40  | 17.40  | 160.09 | 60     |        |   |
|                               |                 | 2007  | 1,127       | 200   | 2,223  | 89    | 71.26  | 12.63  | 140.60 | 74     |        |   |
|                               |                 |       | Old (30-64) | 1992  | 5,578  | 4,229 | 7,777  | 57     | 275.12 | 208.57 | 383.58 | 6 |
|                               |                 |       |             | 1993  | 6,099  | 4,793 | 7,220  | 48     | 296.26 | 232.84 | 350.71 | 4 |
|                               |                 |       |             | 1994  | 5,844  | 5,350 | 6,178  | 56     | 279.68 | 256.04 | 295.65 | 4 |
|                               |                 |       |             | 1995  | 6,369  | 5,291 | 7,596  | 46     | 301.13 | 250.14 | 359.13 | 3 |
| 1996                          | 6,519           |       |             | 4,500 | 7,689  | 45    | 304.13 | 209.94 | 358.68 | 3      |        |   |
| 1997                          | 6,919           |       |             | 4,478 | 8,037  | 43    | 315.83 | 204.41 | 366.89 | 2      |        |   |
| 1998                          | 7,399           |       |             | 4,660 | 8,804  | 39    | 329.92 | 207.80 | 392.56 | 2      |        |   |
| 1999                          | 7,872           |       |             | 4,761 | 9,658  | 39    | 340.72 | 206.06 | 418.05 | 3      |        |   |
| 2000                          | 8,390           |       |             | 4,672 | 10,535 | 34    | 351.15 | 195.55 | 440.95 | 2      |        |   |
| 2001                          | 9,269           |       |             | 4,360 | 11,815 | 33    | 371.91 | 174.97 | 474.11 | 1      |        |   |
| 2002                          | 9,217           |       |             | 3,690 | 13,335 | 29    | 358.90 | 143.69 | 519.27 | 1      |        |   |
| 2003                          | 9,608           |       |             | 2,962 | 15,047 | 27    | 363.64 | 112.10 | 569.47 | 1      |        |   |
| 2004                          | 10,167          |       |             | 2,747 | 16,953 | 26    | 375.17 | 101.35 | 625.60 | 1      |        |   |
| 2005                          | 10,778          |       |             | 2,530 | 19,081 | 22    | 389.01 | 91.32  | 688.68 | 1      |        |   |
| 2006                          | 11,294          | 2,301 | 21,171      | 22    | 403.38 | 82.20 | 756.17 | 1      |        |        |        |   |
| 2007                          | 11,834          | 2,098 | 23,346      | 21    | 417.89 | 74.09 | 824.44 | 1      |        |        |        |   |

| Metropolitan Statistical Area | PWID Population | Year | Number             | Min   | Max   | Rank  | Rate  | Min   | Max   | Rank  |       |    |
|-------------------------------|-----------------|------|--------------------|-------|-------|-------|-------|-------|-------|-------|-------|----|
| Syracuse, NY                  | Total           | 1992 | 3,210              | 2,484 | 3,824 | 88    | 65.53 | 50.72 | 78.08 | 85    |       |    |
|                               |                 | 1993 | 2,634              | 1,408 | 3,701 | 90    | 53.83 | 28.78 | 75.64 | 91    |       |    |
|                               |                 | 1994 | 2,856              | 1,915 | 3,549 | 91    | 58.77 | 39.41 | 73.04 | 90    |       |    |
|                               |                 | 1995 | 2,368              | 1,444 | 3,401 | 92    | 49.03 | 29.91 | 70.44 | 93    |       |    |
|                               |                 | 1996 | 2,242              | 1,368 | 3,253 | 94    | 46.66 | 28.47 | 67.71 | 95    |       |    |
|                               |                 | 1997 | 2,128              | 1,142 | 3,108 | 94    | 44.49 | 23.88 | 64.98 | 95    |       |    |
|                               |                 | 1998 | 2,049              | 1,019 | 2,976 | 96    | 42.85 | 21.31 | 62.24 | 96    |       |    |
|                               |                 | 1999 | 2,174              | 1,057 | 2,844 | 96    | 45.47 | 22.11 | 59.50 | 96    |       |    |
|                               |                 | 2000 | 2,022              | 1,229 | 2,785 | 97    | 42.26 | 25.68 | 58.20 | 96    |       |    |
|                               |                 | 2001 | 2,228              | 1,475 | 2,733 | 96    | 46.38 | 30.69 | 56.89 | 96    |       |    |
|                               |                 | 2002 | 2,115              | 1,600 | 2,710 | 97    | 43.73 | 33.08 | 56.03 | 96    |       |    |
|                               |                 | 2003 | 2,170              | 1,638 | 2,688 | 97    | 44.54 | 33.61 | 55.16 | 96    |       |    |
|                               |                 | 2004 | 2,228              | 1,683 | 2,660 | 96    | 45.47 | 34.35 | 54.28 | 96    |       |    |
|                               |                 | 2005 | 2,285              | 1,728 | 2,626 | 96    | 46.49 | 35.14 | 53.40 | 96    |       |    |
|                               |                 | 2006 | 2,351              | 1,775 | 2,829 | 97    | 47.61 | 35.94 | 57.29 | 96    |       |    |
|                               |                 | 2007 | 2,418              | 1,826 | 3,119 | 97    | 48.79 | 36.85 | 62.95 | 94    |       |    |
|                               |                 |      | Non-Hispanic White | 1992  | 1,569 | 1,214 | 1,869 | 93    | 35.23 | 27.27 | 41.98 | 92 |
|                               |                 |      |                    | 1993  | 1,340 | 717   | 1,883 | 94    | 30.22 | 16.16 | 42.46 | 93 |
|                               |                 |      |                    | 1994  | 1,493 | 1,001 | 1,855 | 94    | 33.98 | 22.79 | 42.23 | 93 |
|                               |                 |      |                    | 1995  | 1,259 | 768   | 1,808 | 96    | 28.90 | 17.63 | 41.52 | 94 |
| 1996                          | 1,202           |      |                    | 733   | 1,744 | 97    | 27.84 | 16.99 | 40.40 | 95    |       |    |
| 1997                          | 1,144           |      |                    | 614   | 1,670 | 97    | 26.68 | 14.32 | 38.96 | 95    |       |    |
| 1998                          | 1,099           |      |                    | 546   | 1,596 | 97    | 25.70 | 12.78 | 37.34 | 97    |       |    |
| 1999                          | 1,159           |      |                    | 564   | 1,517 | 97    | 27.19 | 13.22 | 35.57 | 96    |       |    |
| 2000                          | 1,071           |      |                    | 651   | 1,474 | 97    | 25.15 | 15.28 | 34.64 | 97    |       |    |
| 2001                          | 1,171           |      |                    | 775   | 1,436 | 97    | 27.46 | 18.17 | 33.69 | 95    |       |    |
| 2002                          | 1,104           |      |                    | 835   | 1,414 | 97    | 25.79 | 19.51 | 33.04 | 97    |       |    |
| 2003                          | 1,128           |      |                    | 851   | 1,398 | 98    | 26.21 | 19.78 | 32.47 | 99    |       |    |
| 2004                          | 1,158           |      |                    | 875   | 1,383 | 98    | 26.80 | 20.25 | 32.00 | 100   |       |    |
| 2005                          | 1,195           |      |                    | 903   | 1,373 | 98    | 27.59 | 20.86 | 31.70 | 100   |       |    |
| 2006                          | 1,244           |      |                    | 939   | 1,497 | 98    | 28.66 | 21.63 | 34.48 | 99    |       |    |
| 2007                          | 1,304           | 985  | 1,682              | 98    | 30.00 | 22.65 | 38.70 | 99    |       |       |       |    |

| Metropolitan Statistical Area | PWID Population    | Year | Number   | Min  | Max    | Rank   | Rate   | Min    | Max    | Rank   |        |    |
|-------------------------------|--------------------|------|----------|------|--------|--------|--------|--------|--------|--------|--------|----|
| Syracuse, NY                  | Non-Hispanic Black | 1992 | 1,263    | 978  | 1,505  | 67     | 455.15 | 352.29 | 542.29 | 23     |        |    |
|                               |                    | 1993 | 961      | 514  | 1,350  | 75     | 339.62 | 181.59 | 477.20 | 36     |        |    |
|                               |                    | 1994 | 972      | 652  | 1,208  | 76     | 340.05 | 228.06 | 422.62 | 34     |        |    |
|                               |                    | 1995 | 757      | 462  | 1,087  | 83     | 261.21 | 159.34 | 375.25 | 46     |        |    |
|                               |                    | 1996 | 677      | 413  | 982    | 85     | 229.19 | 139.85 | 332.60 | 51     |        |    |
|                               |                    | 1997 | 610      | 328  | 891    | 85     | 204.55 | 109.77 | 298.74 | 53     |        |    |
|                               |                    | 1998 | 561      | 279  | 815    | 87     | 184.63 | 91.81  | 268.20 | 54     |        |    |
|                               |                    | 1999 | 572      | 278  | 748    | 83     | 186.39 | 90.62  | 243.88 | 51     |        |    |
|                               |                    | 2000 | 513      | 312  | 706    | 84     | 164.52 | 99.97  | 226.54 | 55     |        |    |
|                               |                    | 2001 | 547      | 362  | 671    | 81     | 172.82 | 114.36 | 211.99 | 54     |        |    |
|                               |                    | 2002 | 504      | 381  | 646    | 85     | 155.93 | 117.94 | 199.76 | 54     |        |    |
|                               |                    | 2003 | 503      | 380  | 623    | 85     | 152.92 | 115.39 | 189.40 | 52     |        |    |
|                               |                    | 2004 | 504      | 381  | 602    | 84     | 151.19 | 114.21 | 180.49 | 52     |        |    |
|                               |                    | 2005 | 505      | 382  | 580    | 83     | 149.85 | 113.29 | 172.15 | 51     |        |    |
|                               |                    | 2006 | 509      | 384  | 612    | 83     | 148.36 | 112.00 | 178.51 | 51     |        |    |
|                               |                    | 2007 | 514      | 388  | 663    | 84     | 147.49 | 111.38 | 190.27 | 52     |        |    |
|                               |                    |      | Hispanic | 1992 | 296    | 229    | 353    | 62     | 409.27 | 316.78 | 487.63 | 9  |
|                               |                    |      |          | 1993 | 251    | 134    | 353    | 61     | 332.98 | 178.04 | 467.87 | 12 |
|                               |                    |      |          | 1994 | 282    | 189    | 350    | 61     | 364.18 | 244.24 | 452.61 | 11 |
|                               |                    |      |          | 1995 | 241    | 147    | 347    | 61     | 303.84 | 185.35 | 436.50 | 13 |
| 1996                          | 236                |      |          | 144  | 342    | 63     | 283.29 | 172.86 | 411.10 | 13     |        |    |
| 1997                          | 230                |      |          | 124  | 336    | 63     | 269.67 | 144.71 | 393.84 | 14     |        |    |
| 1998                          | 228                |      |          | 113  | 331    | 64     | 258.04 | 128.31 | 374.83 | 14     |        |    |
| 1999                          | 248                |      |          | 120  | 324    | 64     | 273.28 | 132.88 | 357.58 | 14     |        |    |
| 2000                          | 235                |      |          | 143  | 324    | 65     | 248.55 | 151.03 | 342.24 | 14     |        |    |
| 2001                          | 264                |      |          | 175  | 324    | 64     | 266.64 | 176.44 | 327.07 | 13     |        |    |
| 2002                          | 255                |      |          | 193  | 327    | 65     | 248.29 | 187.80 | 318.10 | 14     |        |    |
| 2003                          | 265                |      |          | 200  | 329    | 65     | 250.05 | 188.69 | 309.70 | 14     |        |    |
| 2004                          | 276                |      |          | 208  | 329    | 66     | 253.98 | 191.86 | 303.19 | 13     |        |    |
| 2005                          | 286                |      |          | 216  | 328    | 67     | 257.49 | 194.67 | 295.81 | 13     |        |    |
| 2006                          | 297                |      |          | 224  | 357    | 66     | 257.09 | 194.08 | 309.35 | 14     |        |    |
| 2007                          | 308                | 233  | 397      | 67   | 259.31 | 195.83 | 334.52 | 14     |        |        |        |    |

| Metropolitan Statistical Area | PWID Population | Year   | Number | Min   | Max   | Rank  | Rate   | Min   | Max    | Rank  |    |
|-------------------------------|-----------------|--------|--------|-------|-------|-------|--------|-------|--------|-------|----|
| Syracuse, NY                  | Male            | 1992   | 2,451  | 1,897 | 2,920 | 86    | 101.47 | 78.54 | 120.90 | 77    |    |
|                               |                 | 1993   | 1,969  | 1,053 | 2,767 | 87    | 81.60  | 43.63 | 114.65 | 86    |    |
|                               |                 | 1994   | 2,097  | 1,406 | 2,606 | 87    | 87.50  | 58.68 | 108.74 | 84    |    |
|                               |                 | 1995   | 1,713  | 1,045 | 2,460 | 91    | 71.92  | 43.87 | 103.32 | 88    |    |
|                               |                 | 1996   | 1,602  | 978   | 2,325 | 92    | 67.58  | 41.24 | 98.08  | 89    |    |
|                               |                 | 1997   | 1,507  | 809   | 2,201 | 93    | 63.88  | 34.28 | 93.29  | 91    |    |
|                               |                 | 1998   | 1,442  | 717   | 2,095 | 93    | 61.13  | 30.40 | 88.80  | 91    |    |
|                               |                 | 1999   | 1,524  | 741   | 1,994 | 93    | 64.66  | 31.44 | 84.61  | 92    |    |
|                               |                 | 2000   | 1,415  | 860   | 1,949 | 93    | 60.00  | 36.46 | 82.62  | 93    |    |
|                               |                 | 2001   | 1,559  | 1,032 | 1,913 | 94    | 65.82  | 43.55 | 80.74  | 93    |    |
|                               |                 | 2002   | 1,481  | 1,120 | 1,898 | 93    | 62.11  | 46.98 | 79.57  | 93    |    |
|                               |                 | 2003   | 1,522  | 1,149 | 1,885 | 92    | 63.29  | 47.75 | 78.38  | 92    |    |
|                               |                 | 2004   | 1,565  | 1,182 | 1,868 | 92    | 64.69  | 48.87 | 77.22  | 91    |    |
|                               |                 | 2005   | 1,608  | 1,215 | 1,847 | 92    | 66.14  | 50.00 | 75.98  | 89    |    |
|                               | 2006            | 1,655  | 1,249  | 1,991 | 93    | 67.73 | 51.13  | 81.50 | 87     |       |    |
|                               | 2007            | 1,701  | 1,285  | 2,194 | 93    | 69.35 | 52.37  | 89.46 | 83     |       |    |
|                               |                 | Female | 1992   | 760   | 589   | 906   | 94     | 30.63 | 23.70  | 36.49 | 96 |
|                               |                 |        | 1993   | 679   | 363   | 954   | 94     | 27.38 | 14.64  | 38.47 | 96 |
|                               |                 |        | 1994   | 787   | 528   | 978   | 95     | 31.95 | 21.43  | 39.71 | 94 |
|                               |                 |        | 1995   | 687   | 419   | 987   | 96     | 28.06 | 17.11  | 40.30 | 97 |
|                               |                 |        | 1996   | 675   | 412   | 980   | 96     | 27.75 | 16.93  | 40.27 | 96 |
|                               |                 |        | 1997   | 658   | 353   | 962   | 96     | 27.18 | 14.58  | 39.69 | 97 |
|                               |                 |        | 1998   | 645   | 321   | 937   | 98     | 26.62 | 13.24  | 38.67 | 99 |
|                               |                 |        | 1999   | 690   | 336   | 903   | 97     | 28.48 | 13.85  | 37.27 | 98 |
|                               |                 |        | 2000   | 643   | 391   | 886   | 98     | 26.52 | 16.11  | 36.51 | 99 |
|                               |                 |        | 2001   | 706   | 467   | 866   | 97     | 29.00 | 19.19  | 35.57 | 97 |
|                               | 2002            |        | 665    | 503   | 852   | 98    | 27.13  | 20.52 | 34.75  | 99    |    |
|                               | 2003            |        | 675    | 509   | 836   | 99    | 27.35  | 20.64 | 33.87  | 99    |    |
|                               | 2004            | 684    | 517    | 817   | 99    | 27.58 | 20.83  | 32.92 | 99     |       |    |
|                               | 2005            | 692    | 524    | 796   | 99    | 27.86 | 21.06  | 32.01 | 99     |       |    |
|                               | 2006            | 704    | 531    | 847   | 99    | 28.20 | 21.29  | 33.94 | 99     |       |    |
|                               | 2007            | 717    | 541    | 925   | 99    | 28.63 | 21.62  | 36.94 | 99     |       |    |

| Metropolitan Statistical Area | PWID Population | Year  | Number      | Min   | Max   | Rank  | Rate  | Min   | Max   | Rank  |       |    |
|-------------------------------|-----------------|-------|-------------|-------|-------|-------|-------|-------|-------|-------|-------|----|
| Syracuse, NY                  | Young (15-29)   | 1992  | 740         | 573   | 882   | 91    | 42.87 | 33.18 | 51.08 | 86    |       |    |
|                               |                 | 1993  | 560         | 299   | 787   | 93    | 33.25 | 17.78 | 46.72 | 94    |       |    |
|                               |                 | 1994  | 580         | 389   | 721   | 93    | 35.57 | 23.85 | 44.20 | 94    |       |    |
|                               |                 | 1995  | 475         | 290   | 683   | 94    | 29.94 | 18.27 | 43.02 | 94    |       |    |
|                               |                 | 1996  | 458         | 279   | 664   | 94    | 29.55 | 18.03 | 42.88 | 94    |       |    |
|                               |                 | 1997  | 453         | 243   | 661   | 94    | 29.83 | 16.01 | 43.56 | 94    |       |    |
|                               |                 | 1998  | 463         | 230   | 673   | 94    | 30.92 | 15.38 | 44.92 | 95    |       |    |
|                               |                 | 1999  | 530         | 258   | 693   | 96    | 35.90 | 17.45 | 46.97 | 95    |       |    |
|                               |                 | 2000  | 536         | 326   | 738   | 96    | 36.62 | 22.25 | 50.43 | 96    |       |    |
|                               |                 | 2001  | 645         | 427   | 792   | 96    | 43.76 | 28.96 | 53.68 | 95    |       |    |
|                               |                 | 2002  | 669         | 506   | 857   | 96    | 44.60 | 33.73 | 57.14 | 94    |       |    |
|                               |                 | 2003  | 746         | 563   | 924   | 97    | 48.55 | 36.64 | 60.13 | 91    |       |    |
|                               |                 | 2004  | 825         | 624   | 985   | 97    | 52.56 | 39.71 | 62.75 | 89    |       |    |
|                               |                 | 2005  | 903         | 682   | 1,037 | 97    | 56.17 | 42.47 | 64.53 | 92    |       |    |
|                               |                 | 2006  | 977         | 737   | 1,175 | 95    | 59.57 | 44.97 | 71.68 | 89    |       |    |
|                               |                 | 2007  | 1,040       | 785   | 1,341 | 96    | 62.33 | 47.07 | 80.41 | 86    |       |    |
|                               |                 |       | Old (30-64) | 1992  | 2,545 | 1,970 | 3,032 | 87    | 80.23 | 62.10 | 95.59 | 82 |
|                               |                 |       |             | 1993  | 2,131 | 1,140 | 2,994 | 87    | 66.40 | 35.50 | 93.29 | 88 |
|                               |                 |       |             | 1994  | 2,335 | 1,566 | 2,902 | 88    | 72.35 | 48.52 | 89.91 | 87 |
|                               |                 |       |             | 1995  | 1,943 | 1,185 | 2,791 | 92    | 59.93 | 36.56 | 86.09 | 89 |
| 1996                          | 1,833           |       |             | 1,119 | 2,661 | 92    | 56.31 | 34.36 | 81.72 | 92    |       |    |
| 1997                          | 1,724           |       |             | 925   | 2,518 | 93    | 52.82 | 28.35 | 77.14 | 93    |       |    |
| 1998                          | 1,635           |       |             | 813   | 2,375 | 95    | 49.80 | 24.76 | 72.34 | 94    |       |    |
| 1999                          | 1,698           |       |             | 825   | 2,221 | 96    | 51.38 | 24.98 | 67.23 | 93    |       |    |
| 2000                          | 1,536           |       |             | 933   | 2,114 | 96    | 46.24 | 28.10 | 63.68 | 94    |       |    |
| 2001                          | 1,634           |       |             | 1,081 | 2,005 | 96    | 49.08 | 32.48 | 60.21 | 92    |       |    |
| 2002                          | 1,488           |       |             | 1,125 | 1,906 | 97    | 44.59 | 33.73 | 57.13 | 94    |       |    |
| 2003                          | 1,456           |       |             | 1,098 | 1,803 | 97    | 43.63 | 32.92 | 54.03 | 94    |       |    |
| 2004                          | 1,417           |       |             | 1,070 | 1,692 | 96    | 42.57 | 32.15 | 50.81 | 94    |       |    |
| 2005                          | 1,373           |       |             | 1,038 | 1,578 | 96    | 41.49 | 31.37 | 47.67 | 92    |       |    |
| 2006                          | 1,332           | 1,005 | 1,603       | 96    | 40.37 | 30.47 | 48.57 | 93    |       |       |       |    |
| 2007                          | 1,292           | 976   | 1,667       | 96    | 39.32 | 29.69 | 50.72 | 93    |       |       |       |    |

| Metropolitan Statistical Area | PWID Population | Year  | Number             | Min   | Max    | Rank  | Rate   | Min    | Max    | Rank   |        |    |
|-------------------------------|-----------------|-------|--------------------|-------|--------|-------|--------|--------|--------|--------|--------|----|
| Tacoma, WA                    | Total           | 1992  | 5,725              | 4,539 | 6,824  | 70    | 140.70 | 111.56 | 167.71 | 38     |        |    |
|                               |                 | 1993  | 7,673              | 4,956 | 13,198 | 53    | 184.64 | 119.25 | 317.58 | 18     |        |    |
|                               |                 | 1994  | 5,920              | 5,361 | 6,936  | 69    | 140.23 | 126.99 | 164.29 | 36     |        |    |
|                               |                 | 1995  | 7,478              | 5,295 | 11,791 | 53    | 173.66 | 122.96 | 273.82 | 18     |        |    |
|                               |                 | 1996  | 7,351              | 5,104 | 10,992 | 53    | 168.56 | 117.02 | 252.04 | 17     |        |    |
|                               |                 | 1997  | 7,248              | 4,924 | 10,193 | 55    | 163.52 | 111.09 | 229.95 | 16     |        |    |
|                               |                 | 1998  | 7,223              | 4,892 | 9,427  | 55    | 159.25 | 107.87 | 207.86 | 15     |        |    |
|                               |                 | 1999  | 6,726              | 4,856 | 8,046  | 63    | 144.94 | 104.64 | 173.38 | 24     |        |    |
|                               |                 | 2000  | 7,280              | 4,901 | 8,725  | 53    | 153.96 | 103.65 | 184.52 | 16     |        |    |
|                               |                 | 2001  | 7,472              | 4,965 | 9,497  | 58    | 154.50 | 102.65 | 196.37 | 18     |        |    |
|                               |                 | 2002  | 7,592              | 4,854 | 10,325 | 50    | 153.66 | 98.25  | 208.99 | 16     |        |    |
|                               |                 | 2003  | 7,689              | 4,698 | 11,136 | 50    | 153.57 | 93.84  | 222.42 | 16     |        |    |
|                               |                 | 2004  | 7,772              | 4,495 | 11,966 | 51    | 153.74 | 88.92  | 236.71 | 16     |        |    |
|                               |                 | 2005  | 7,919              | 4,314 | 12,938 | 51    | 154.18 | 84.00  | 251.92 | 15     |        |    |
|                               |                 | 2006  | 8,132              | 4,123 | 14,072 | 51    | 154.83 | 78.50  | 267.92 | 15     |        |    |
|                               |                 | 2007  | 8,284              | 3,576 | 15,115 | 50    | 155.67 | 67.20  | 284.02 | 15     |        |    |
|                               |                 |       | Non-Hispanic White | 1992  | 3,742  | 2,967 | 4,461  | 60     | 111.35 | 88.29  | 132.73 | 34 |
|                               |                 |       |                    | 1993  | 5,045  | 3,258 | 8,678  | 43     | 147.60 | 95.33  | 253.87 | 17 |
|                               |                 |       |                    | 1994  | 3,904  | 3,535 | 4,573  | 59     | 113.18 | 102.49 | 132.60 | 26 |
|                               |                 |       |                    | 1995  | 4,933  | 3,493 | 7,778  | 41     | 141.12 | 99.92  | 222.50 | 17 |
| 1996                          | 4,842           |       |                    | 3,362 | 7,240  | 42    | 137.66 | 95.57  | 205.83 | 16     |        |    |
| 1997                          | 4,760           |       |                    | 3,234 | 6,694  | 42    | 134.03 | 91.05  | 188.48 | 16     |        |    |
| 1998                          | 4,726           |       |                    | 3,201 | 6,168  | 41    | 130.73 | 88.55  | 170.63 | 15     |        |    |
| 1999                          | 4,381           |       |                    | 3,163 | 5,241  | 48    | 119.16 | 86.03  | 142.54 | 22     |        |    |
| 2000                          | 4,720           |       |                    | 3,177 | 5,657  | 40    | 126.81 | 85.37  | 151.97 | 16     |        |    |
| 2001                          | 4,823           |       |                    | 3,205 | 6,130  | 44    | 127.14 | 84.47  | 161.60 | 18     |        |    |
| 2002                          | 4,882           |       |                    | 3,121 | 6,640  | 40    | 126.50 | 80.88  | 172.05 | 16     |        |    |
| 2003                          | 4,931           |       |                    | 3,013 | 7,142  | 41    | 126.44 | 77.26  | 183.12 | 15     |        |    |
| 2004                          | 4,979           |       |                    | 2,880 | 7,665  | 42    | 126.66 | 73.26  | 195.01 | 15     |        |    |
| 2005                          | 5,076           |       |                    | 2,765 | 8,294  | 42    | 127.57 | 69.50  | 208.44 | 14     |        |    |
| 2006                          | 5,228           | 2,651 | 9,046              | 41    | 129.14 | 65.48 | 223.47 | 14     |        |        |        |    |
| 2007                          | 5,354           | 2,311 | 9,768              | 41    | 131.09 | 56.59 | 239.16 | 15     |        |        |        |    |

| Metropolitan Statistical Area | PWID Population    | Year | Number   | Min  | Max    | Rank  | Rate   | Min    | Max    | Rank   |        |    |
|-------------------------------|--------------------|------|----------|------|--------|-------|--------|--------|--------|--------|--------|----|
| Tacoma, WA                    | Non-Hispanic Black | 1992 | 1,000    | 793  | 1,192  | 79    | 349.56 | 277.16 | 416.66 | 39     |        |    |
|                               |                    | 1993 | 1,161    | 750  | 1,997  | 68    | 399.72 | 258.16 | 687.52 | 27     |        |    |
|                               |                    | 1994 | 798      | 722  | 935    | 84    | 265.34 | 240.29 | 310.87 | 51     |        |    |
|                               |                    | 1995 | 921      | 652  | 1,453  | 73    | 296.47 | 209.91 | 467.45 | 39     |        |    |
|                               |                    | 1996 | 848      | 589  | 1,268  | 73    | 266.03 | 184.69 | 397.78 | 42     |        |    |
|                               |                    | 1997 | 800      | 543  | 1,125  | 74    | 243.05 | 165.12 | 341.80 | 43     |        |    |
|                               |                    | 1998 | 777      | 526  | 1,014  | 73    | 231.34 | 156.69 | 301.95 | 40     |        |    |
|                               |                    | 1999 | 716      | 517  | 856    | 76    | 206.93 | 149.40 | 247.53 | 46     |        |    |
|                               |                    | 2000 | 776      | 522  | 930    | 69    | 216.42 | 145.69 | 259.36 | 36     |        |    |
|                               |                    | 2001 | 804      | 535  | 1,023  | 69    | 220.06 | 146.21 | 279.70 | 27     |        |    |
|                               |                    | 2002 | 830      | 531  | 1,129  | 67    | 220.13 | 140.75 | 299.41 | 27     |        |    |
|                               |                    | 2003 | 855      | 522  | 1,238  | 67    | 224.42 | 137.13 | 325.02 | 25     |        |    |
|                               |                    | 2004 | 877      | 507  | 1,350  | 67    | 228.92 | 132.40 | 352.45 | 21     |        |    |
|                               |                    | 2005 | 904      | 492  | 1,477  | 67    | 232.25 | 126.53 | 379.46 | 20     |        |    |
|                               |                    | 2006 | 933      | 473  | 1,614  | 66    | 232.30 | 117.78 | 401.97 | 20     |        |    |
|                               |                    | 2007 | 948      | 409  | 1,729  | 68    | 232.90 | 100.54 | 424.92 | 24     |        |    |
|                               |                    |      | Hispanic | 1992 | 322    | 255   | 384    | 58     | 213.29 | 169.12 | 254.24 | 28 |
|                               |                    |      |          | 1993 | 412    | 266   | 708    | 55     | 256.81 | 165.86 | 441.72 | 22 |
|                               |                    |      |          | 1994 | 307    | 278   | 359    | 60     | 179.38 | 162.44 | 210.15 | 28 |
|                               |                    |      |          | 1995 | 378    | 267   | 595    | 57     | 207.28 | 146.76 | 326.82 | 26 |
| 1996                          | 365                |      |          | 253  | 545    | 57    | 188.02 | 130.53 | 281.13 | 28     |        |    |
| 1997                          | 355                |      |          | 241  | 500    | 58    | 171.91 | 116.79 | 241.75 | 31     |        |    |
| 1998                          | 351                |      |          | 238  | 459    | 59    | 159.42 | 107.98 | 208.08 | 29     |        |    |
| 1999                          | 326                |      |          | 235  | 390    | 61    | 138.83 | 100.23 | 166.07 | 31     |        |    |
| 2000                          | 351                |      |          | 237  | 421    | 61    | 142.42 | 95.88  | 170.68 | 26     |        |    |
| 2001                          | 360                |      |          | 239  | 457    | 61    | 136.75 | 90.86  | 173.81 | 27     |        |    |
| 2002                          | 364                |      |          | 233  | 495    | 62    | 130.18 | 83.23  | 177.05 | 29     |        |    |
| 2003                          | 366                |      |          | 224  | 530    | 62    | 125.76 | 76.84  | 182.13 | 31     |        |    |
| 2004                          | 366                |      |          | 212  | 564    | 62    | 121.92 | 70.52  | 187.71 | 31     |        |    |
| 2005                          | 368                |      |          | 200  | 601    | 62    | 116.49 | 63.46  | 190.32 | 31     |        |    |
| 2006                          | 371                |      |          | 188  | 642    | 62    | 109.80 | 55.67  | 190.00 | 32     |        |    |
| 2007                          | 369                | 159  | 674      | 64   | 104.56 | 45.13 | 190.76 | 36     |        |        |        |    |

| Metropolitan Statistical Area | PWID Population | Year   | Number | Min   | Max   | Rank   | Rate   | Min    | Max    | Rank   |    |
|-------------------------------|-----------------|--------|--------|-------|-------|--------|--------|--------|--------|--------|----|
| Tacoma, WA                    | Male            | 1992   | 3,336  | 2,645 | 3,977 | 78     | 161.89 | 128.36 | 192.97 | 44     |    |
|                               |                 | 1993   | 4,522  | 2,921 | 7,778 | 58     | 215.33 | 139.07 | 370.37 | 27     |    |
|                               |                 | 1994   | 3,485  | 3,156 | 4,083 | 78     | 163.00 | 147.61 | 190.97 | 41     |    |
|                               |                 | 1995   | 4,353  | 3,082 | 6,863 | 63     | 200.06 | 141.65 | 315.44 | 28     |    |
|                               |                 | 1996   | 4,195  | 2,912 | 6,272 | 63     | 190.59 | 132.32 | 284.98 | 31     |    |
|                               |                 | 1997   | 4,027  | 2,735 | 5,662 | 63     | 180.06 | 122.32 | 253.21 | 33     |    |
|                               |                 | 1998   | 3,886  | 2,632 | 5,072 | 65     | 170.09 | 115.21 | 222.00 | 35     |    |
|                               |                 | 1999   | 3,494  | 2,522 | 4,179 | 76     | 149.31 | 107.80 | 178.60 | 38     |    |
|                               |                 | 2000   | 3,647  | 2,455 | 4,370 | 68     | 153.12 | 103.08 | 183.51 | 38     |    |
|                               |                 | 2001   | 3,616  | 2,403 | 4,596 | 74     | 148.39 | 98.59  | 188.60 | 36     |    |
|                               |                 | 2002   | 3,567  | 2,280 | 4,851 | 71     | 143.51 | 91.76  | 195.19 | 38     |    |
|                               |                 | 2003   | 3,535  | 2,160 | 5,120 | 71     | 141.06 | 86.20  | 204.30 | 39     |    |
|                               |                 | 2004   | 3,536  | 2,045 | 5,445 | 71     | 139.87 | 80.90  | 215.35 | 39     |    |
|                               |                 | 2005   | 3,618  | 1,971 | 5,911 | 68     | 140.56 | 76.58  | 229.66 | 36     |    |
|                               | 2006            | 3,794  | 1,924  | 6,565 | 68    | 143.73 | 72.88  | 248.72 | 33     |        |    |
|                               | 2007            | 4,022  | 1,736  | 7,338 | 66    | 150.46 | 64.95  | 274.51 | 31     |        |    |
|                               |                 | Female | 1992   | 2,349 | 1,862 | 2,800  | 64     | 116.97 | 92.74  | 139.42 | 22 |
|                               |                 |        | 1993   | 3,126 | 2,019 | 5,376  | 43     | 152.06 | 98.21  | 261.55 | 11 |
|                               |                 |        | 1994   | 2,435 | 2,206 | 2,853  | 62     | 116.89 | 105.85 | 136.95 | 21 |
|                               |                 |        | 1995   | 3,149 | 2,229 | 4,965  | 44     | 147.81 | 104.65 | 233.06 | 11 |
|                               |                 |        | 1996   | 3,200 | 2,221 | 4,784  | 45     | 148.11 | 102.82 | 221.46 | 7  |
|                               |                 |        | 1997   | 3,281 | 2,229 | 4,613  | 43     | 149.37 | 101.48 | 210.05 | 7  |
|                               |                 |        | 1998   | 3,409 | 2,309 | 4,449  | 41     | 151.45 | 102.58 | 197.68 | 7  |
|                               |                 |        | 1999   | 3,308 | 2,389 | 3,957  | 45     | 143.78 | 103.80 | 171.99 | 7  |
|                               |                 |        | 2000   | 3,720 | 2,504 | 4,458  | 39     | 158.49 | 106.69 | 189.94 | 6  |
|                               |                 |        | 2001   | 3,944 | 2,620 | 5,013  | 41     | 164.37 | 109.21 | 208.92 | 6  |
|                               | 2002            |        | 4,108  | 2,627 | 5,588 | 38     | 167.32 | 106.99 | 227.58 | 5      |    |
|                               | 2003            |        | 4,227  | 2,583 | 6,122 | 35     | 169.03 | 103.29 | 244.81 | 4      |    |
|                               | 2004            | 4,292  | 2,482  | 6,608 | 36    | 169.86 | 98.24  | 261.52 | 4      |        |    |
|                               | 2005            | 4,334  | 2,361  | 7,081 | 36    | 169.16 | 92.16  | 276.38 | 4      |        |    |
|                               | 2006            | 4,339  | 2,200  | 7,509 | 36    | 166.11 | 84.22  | 287.43 | 4      |        |    |
|                               | 2007            | 4,223  | 1,823  | 7,704 | 36    | 159.42 | 68.82  | 290.86 | 4      |        |    |



| Metropolitan Statistical Area | PWID Population | Year  | Number      | Min   | Max    | Rank  | Rate   | Min    | Max    | Rank   |        |    |
|-------------------------------|-----------------|-------|-------------|-------|--------|-------|--------|--------|--------|--------|--------|----|
| Tacoma, WA                    | Young (15-29)   | 1992  | 1,353       | 1,073 | 1,613  | 75    | 96.80  | 76.75  | 115.38 | 42     |        |    |
|                               |                 | 1993  | 1,860       | 1,202 | 3,200  | 53    | 134.19 | 86.67  | 230.81 | 23     |        |    |
|                               |                 | 1994  | 1,466       | 1,327 | 1,717  | 73    | 105.63 | 95.66  | 123.76 | 36     |        |    |
|                               |                 | 1995  | 1,881       | 1,332 | 2,966  | 54    | 134.86 | 95.48  | 212.63 | 20     |        |    |
|                               |                 | 1996  | 1,871       | 1,299 | 2,798  | 55    | 133.61 | 92.76  | 199.78 | 18     |        |    |
|                               |                 | 1997  | 1,859       | 1,263 | 2,614  | 57    | 131.25 | 89.17  | 184.57 | 21     |        |    |
|                               |                 | 1998  | 1,860       | 1,260 | 2,427  | 61    | 128.91 | 87.31  | 168.25 | 26     |        |    |
|                               |                 | 1999  | 1,732       | 1,251 | 2,072  | 67    | 117.71 | 84.99  | 140.81 | 33     |        |    |
|                               |                 | 2000  | 1,869       | 1,258 | 2,240  | 62    | 125.42 | 84.43  | 150.30 | 28     |        |    |
|                               |                 | 2001  | 1,906       | 1,266 | 2,423  | 68    | 125.29 | 83.24  | 159.25 | 32     |        |    |
|                               |                 | 2002  | 1,919       | 1,227 | 2,609  | 68    | 122.98 | 78.64  | 167.27 | 33     |        |    |
|                               |                 | 2003  | 1,920       | 1,173 | 2,781  | 70    | 121.63 | 74.32  | 176.15 | 33     |        |    |
|                               |                 | 2004  | 1,913       | 1,106 | 2,945  | 74    | 120.13 | 69.48  | 184.95 | 33     |        |    |
|                               |                 | 2005  | 1,917       | 1,044 | 3,132  | 74    | 118.33 | 64.46  | 193.33 | 32     |        |    |
|                               |                 | 2006  | 1,933       | 980   | 3,345  | 75    | 115.75 | 58.69  | 200.29 | 37     |        |    |
|                               |                 | 2007  | 1,931       | 833   | 3,522  | 75    | 114.44 | 49.40  | 208.79 | 37     |        |    |
|                               |                 |       | Old (30-64) | 1992  | 4,456  | 3,533 | 5,312  | 68     | 166.84 | 132.28 | 198.86 | 34 |
|                               |                 |       |             | 1993  | 5,871  | 3,792 | 10,099 | 52     | 212.01 | 136.93 | 364.67 | 17 |
|                               |                 |       |             | 1994  | 4,483  | 4,060 | 5,252  | 67     | 158.17 | 143.24 | 185.31 | 36 |
|                               |                 |       |             | 1995  | 5,638  | 3,992 | 8,889  | 53     | 193.66 | 137.12 | 305.35 | 18 |
| 1996                          | 5,542           |       |             | 3,848 | 8,287  | 54    | 187.19 | 129.96 | 279.89 | 16     |        |    |
| 1997                          | 5,480           |       |             | 3,723 | 7,706  | 53    | 181.68 | 123.43 | 255.49 | 16     |        |    |
| 1998                          | 5,481           |       |             | 3,713 | 7,154  | 54    | 177.24 | 120.05 | 231.33 | 16     |        |    |
| 1999                          | 5,121           |       |             | 3,697 | 6,125  | 59    | 161.58 | 116.66 | 193.28 | 22     |        |    |
| 2000                          | 5,547           |       |             | 3,734 | 6,648  | 52    | 171.30 | 115.32 | 205.30 | 15     |        |    |
| 2001                          | 5,678           |       |             | 3,772 | 7,216  | 53    | 171.26 | 113.79 | 217.68 | 12     |        |    |
| 2002                          | 5,722           |       |             | 3,658 | 7,782  | 46    | 169.25 | 108.22 | 230.20 | 9      |        |    |
| 2003                          | 5,707           |       |             | 3,487 | 8,265  | 46    | 166.47 | 101.72 | 241.09 | 9      |        |    |
| 2004                          | 5,625           |       |             | 3,253 | 8,660  | 47    | 162.42 | 93.94  | 250.07 | 9      |        |    |
| 2005                          | 5,510           |       |             | 3,002 | 9,003  | 48    | 156.73 | 85.39  | 256.07 | 11     |        |    |
| 2006                          | 5,333           | 2,704 | 9,228       | 48    | 148.87 | 75.48 | 257.60 | 11     |        |        |        |    |
| 2007                          | 4,973           | 2,147 | 9,073       | 49    | 136.81 | 59.06 | 249.61 | 13     |        |        |        |    |

| Metropolitan Statistical Area         | PWID Population | Year  | Number             | Min    | Max    | Rank  | Rate   | Min    | Max    | Rank  |        |    |
|---------------------------------------|-----------------|-------|--------------------|--------|--------|-------|--------|--------|--------|-------|--------|----|
| Tampa--St. Petersburg--Clearwater, FL | Total           | 1992  | 15,708             | 12,157 | 17,834 | 31    | 121.06 | 93.69  | 137.44 | 44    |        |    |
|                                       |                 | 1993  | 12,805             | 4,647  | 17,512 | 33    | 97.71  | 35.46  | 133.62 | 52    |        |    |
|                                       |                 | 1994  | 15,416             | 12,535 | 17,240 | 31    | 116.07 | 94.39  | 129.81 | 45    |        |    |
|                                       |                 | 1995  | 12,850             | 5,208  | 17,054 | 31    | 95.01  | 38.50  | 126.09 | 51    |        |    |
|                                       |                 | 1996  | 12,929             | 5,461  | 16,842 | 32    | 94.02  | 39.71  | 122.48 | 52    |        |    |
|                                       |                 | 1997  | 13,251             | 5,741  | 16,756 | 31    | 94.08  | 40.76  | 118.97 | 51    |        |    |
|                                       |                 | 1998  | 13,871             | 6,030  | 16,713 | 30    | 96.17  | 41.80  | 115.87 | 50    |        |    |
|                                       |                 | 1999  | 17,158             | 16,524 | 17,568 | 20    | 116.55 | 112.24 | 119.34 | 40    |        |    |
|                                       |                 | 2000  | 15,202             | 6,548  | 18,931 | 25    | 101.02 | 43.51  | 125.80 | 47    |        |    |
|                                       |                 | 2001  | 18,890             | 16,294 | 20,547 | 20    | 122.77 | 105.90 | 133.54 | 34    |        |    |
|                                       |                 | 2002  | 16,187             | 6,230  | 22,921 | 23    | 102.86 | 39.59  | 145.66 | 43    |        |    |
|                                       |                 | 2003  | 16,348             | 6,050  | 25,363 | 20    | 101.69 | 37.63  | 157.77 | 44    |        |    |
|                                       |                 | 2004  | 16,564             | 5,890  | 28,353 | 21    | 100.19 | 35.63  | 171.50 | 45    |        |    |
|                                       |                 | 2005  | 16,770             | 5,698  | 31,506 | 21    | 98.59  | 33.50  | 185.23 | 44    |        |    |
|                                       |                 | 2006  | 16,869             | 5,457  | 34,675 | 20    | 96.97  | 31.37  | 199.34 | 47    |        |    |
|                                       |                 | 2007  | 16,763             | 5,125  | 37,540 | 20    | 95.31  | 29.14  | 213.45 | 46    |        |    |
|                                       |                 |       | Non-Hispanic White | 1992   | 10,552 | 8,166 | 11,980 | 20     | 100.33 | 77.65 | 113.90 | 38 |
|                                       |                 |       |                    | 1993   | 8,649  | 3,139 | 11,829 | 24     | 82.13  | 29.81 | 112.33 | 44 |
|                                       |                 |       |                    | 1994   | 10,462 | 8,507 | 11,701 | 18     | 98.77  | 80.31 | 110.46 | 38 |
|                                       |                 |       |                    | 1995   | 8,758  | 3,549 | 11,623 | 24     | 81.90  | 33.19 | 108.69 | 51 |
| 1996                                  | 8,848           |       |                    | 3,737  | 11,525 | 24    | 82.10  | 34.68  | 106.95 | 49    |        |    |
| 1997                                  | 9,106           |       |                    | 3,945  | 11,515 | 23    | 83.20  | 36.04  | 105.20 | 47    |        |    |
| 1998                                  | 9,576           |       |                    | 4,163  | 11,538 | 21    | 86.08  | 37.42  | 103.72 | 43    |        |    |
| 1999                                  | 11,908          |       |                    | 11,468 | 12,193 | 14    | 105.84 | 101.93 | 108.38 | 29    |        |    |
| 2000                                  | 10,615          |       |                    | 4,572  | 13,219 | 18    | 93.15  | 40.12  | 116.00 | 38    |        |    |
| 2001                                  | 13,284          |       |                    | 11,459 | 14,449 | 13    | 115.09 | 99.28  | 125.18 | 24    |        |    |
| 2002                                  | 11,478          |       |                    | 4,418  | 16,254 | 16    | 98.20  | 37.80  | 139.06 | 32    |        |    |
| 2003                                  | 11,704          |       |                    | 4,331  | 18,159 | 15    | 98.90  | 36.60  | 153.44 | 32    |        |    |
| 2004                                  | 11,990          |       |                    | 4,264  | 20,524 | 15    | 99.44  | 35.36  | 170.22 | 34    |        |    |
| 2005                                  | 12,289          |       |                    | 4,176  | 23,088 | 14    | 100.08 | 34.01  | 188.03 | 34    |        |    |
| 2006                                  | 12,531          | 4,054 | 25,759             | 14     | 100.96 | 32.66 | 207.53 | 34     |        |       |        |    |
| 2007                                  | 12,638          | 3,864 | 28,303             | 14     | 101.87 | 31.14 | 228.13 | 34     |        |       |        |    |

| Metropolitan Statistical Area         | PWID Population    | Year | Number   | Min   | Max   | Rank  | Rate   | Min    | Max    | Rank  |        |    |
|---------------------------------------|--------------------|------|----------|-------|-------|-------|--------|--------|--------|-------|--------|----|
| Tampa--St. Petersburg--Clearwater, FL | Non-Hispanic Black | 1992 | 3,139    | 2,430 | 3,564 | 33    | 261.21 | 202.15 | 296.56 | 58    |        |    |
|                                       |                    | 1993 | 2,470    | 896   | 3,378 | 40    | 199.84 | 72.53  | 273.30 | 65    |        |    |
|                                       |                    | 1994 | 2,875    | 2,338 | 3,215 | 35    | 225.82 | 183.63 | 252.56 | 63    |        |    |
|                                       |                    | 1995 | 2,315    | 938   | 3,073 | 40    | 175.92 | 71.29  | 233.47 | 69    |        |    |
|                                       |                    | 1996 | 2,245    | 948   | 2,924 | 39    | 165.44 | 69.88  | 215.51 | 71    |        |    |
|                                       |                    | 1997 | 2,206    | 956   | 2,790 | 38    | 156.21 | 67.67  | 197.52 | 73    |        |    |
|                                       |                    | 1998 | 2,200    | 956   | 2,651 | 36    | 150.09 | 65.25  | 180.85 | 69    |        |    |
|                                       |                    | 1999 | 2,569    | 2,474 | 2,631 | 34    | 169.23 | 162.98 | 173.28 | 65    |        |    |
|                                       |                    | 2000 | 2,125    | 915   | 2,646 | 36    | 135.78 | 58.48  | 169.08 | 69    |        |    |
|                                       |                    | 2001 | 2,431    | 2,097 | 2,645 | 34    | 149.88 | 129.29 | 163.03 | 66    |        |    |
|                                       |                    | 2002 | 1,888    | 727   | 2,673 | 40    | 112.35 | 43.25  | 159.10 | 69    |        |    |
|                                       |                    | 2003 | 1,696    | 628   | 2,631 | 44    | 97.57  | 36.11  | 151.39 | 76    |        |    |
|                                       |                    | 2004 | 1,497    | 533   | 2,563 | 52    | 82.72  | 29.42  | 141.60 | 85    |        |    |
|                                       |                    | 2005 | 1,292    | 439   | 2,427 | 59    | 68.53  | 23.29  | 128.74 | 88    |        |    |
|                                       |                    | 2006 | 1,082    | 350   | 2,224 | 65    | 55.20  | 17.86  | 113.46 | 93    |        |    |
|                                       |                    | 2007 | 875      | 267   | 1,959 | 71    | 43.39  | 13.26  | 97.16  | 98    |        |    |
|                                       |                    |      | Hispanic | 1992  | 908   | 703   | 1,031  | 39     | 89.17  | 69.01 | 101.24 | 64 |
|                                       |                    |      |          | 1993  | 718   | 261   | 982    | 46     | 66.56  | 24.16 | 91.02  | 67 |
|                                       |                    |      |          | 1994  | 859   | 698   | 960    | 42     | 75.58  | 61.46 | 84.52  | 68 |
|                                       |                    |      |          | 1995  | 725   | 294   | 962    | 48     | 59.87  | 24.26 | 79.46  | 72 |
| 1996                                  | 751                |      |          | 317   | 978   | 47    | 58.18  | 24.58  | 75.79  | 71    |        |    |
| 1997                                  | 802                |      |          | 347   | 1,014 | 46    | 58.46  | 25.32  | 73.92  | 67    |        |    |
| 1998                                  | 884                |      |          | 384   | 1,065 | 45    | 60.77  | 26.42  | 73.22  | 64    |        |    |
| 1999                                  | 1,157              |      |          | 1,114 | 1,185 | 41    | 74.79  | 72.03  | 76.58  | 57    |        |    |
| 2000                                  | 1,089              |      |          | 469   | 1,356 | 43    | 65.83  | 28.35  | 81.98  | 59    |        |    |
| 2001                                  | 1,436              |      |          | 1,239 | 1,562 | 40    | 81.39  | 70.21  | 88.53  | 53    |        |    |
| 2002                                  | 1,303              |      |          | 502   | 1,845 | 42    | 69.05  | 26.58  | 97.78  | 57    |        |    |
| 2003                                  | 1,386              |      |          | 513   | 2,150 | 40    | 69.36  | 25.67  | 107.61 | 56    |        |    |
| 2004                                  | 1,467              |      |          | 522   | 2,512 | 40    | 68.79  | 24.46  | 117.76 | 56    |        |    |
| 2005                                  | 1,536              |      |          | 522   | 2,887 | 40    | 67.32  | 22.88  | 126.49 | 56    |        |    |
| 2006                                  | 1,579              |      |          | 511   | 3,246 | 40    | 64.87  | 20.99  | 133.35 | 57    |        |    |
| 2007                                  | 1,582              | 483  | 3,542    | 41    | 61.89 | 18.92 | 138.60 | 58     |        |       |        |    |

| Metropolitan Statistical Area         | PWID Population | Year   | Number | Min    | Max    | Rank   | Rate   | Min    | Max    | Rank   |    |
|---------------------------------------|-----------------|--------|--------|--------|--------|--------|--------|--------|--------|--------|----|
| Tampa--St. Petersburg--Clearwater, FL | Male            | 1992   | 10,047 | 7,776  | 11,407 | 33     | 158.50 | 122.67 | 179.95 | 45     |    |
|                                       |                 | 1993   | 8,147  | 2,957  | 11,142 | 35     | 127.12 | 46.14  | 173.85 | 53     |    |
|                                       |                 | 1994   | 9,733  | 7,915  | 10,885 | 32     | 149.80 | 121.81 | 167.54 | 44     |    |
|                                       |                 | 1995   | 8,033  | 3,255  | 10,660 | 34     | 121.36 | 49.18  | 161.06 | 53     |    |
|                                       |                 | 1996   | 7,986  | 3,373  | 10,403 | 33     | 118.53 | 50.07  | 154.40 | 53     |    |
|                                       |                 | 1997   | 8,074  | 3,498  | 10,210 | 33     | 116.86 | 50.63  | 147.77 | 52     |    |
|                                       |                 | 1998   | 8,327  | 3,620  | 10,033 | 32     | 117.67 | 51.15  | 141.78 | 52     |    |
|                                       |                 | 1999   | 10,137 | 9,763  | 10,380 | 26     | 140.25 | 135.07 | 143.61 | 40     |    |
|                                       |                 | 2000   | 8,835  | 3,806  | 11,003 | 29     | 119.54 | 51.49  | 148.87 | 52     |    |
|                                       |                 | 2001   | 10,798 | 9,314  | 11,745 | 21     | 142.85 | 123.22 | 155.38 | 38     |    |
|                                       |                 | 2002   | 9,103  | 3,504  | 12,891 | 28     | 117.72 | 45.31  | 166.71 | 49     |    |
|                                       |                 | 2003   | 9,053  | 3,350  | 14,045 | 27     | 114.53 | 42.38  | 177.69 | 54     |    |
|                                       |                 | 2004   | 9,044  | 3,216  | 15,481 | 27     | 111.11 | 39.51  | 190.19 | 55     |    |
|                                       |                 | 2005   | 9,045  | 3,074  | 16,993 | 27     | 107.91 | 36.67  | 202.74 | 56     |    |
|                                       |                 | 2006   | 9,011  | 2,915  | 18,522 | 27     | 105.03 | 33.98  | 215.90 | 56     |    |
|                                       | 2007            | 8,894  | 2,719  | 19,919 | 26     | 102.37 | 31.29  | 229.24 | 56     |        |    |
|                                       |                 | Female | 1992   | 5,680  | 4,396  | 6,448  | 29     | 85.58  | 66.23  | 97.17  | 39 |
|                                       |                 |        | 1993   | 4,634  | 1,682  | 6,337  | 32     | 69.20  | 25.12  | 94.64  | 47 |
|                                       |                 |        | 1994   | 5,616  | 4,567  | 6,281  | 26     | 82.79  | 67.32  | 92.59  | 41 |
|                                       |                 |        | 1995   | 4,737  | 1,920  | 6,287  | 29     | 68.59  | 27.80  | 91.03  | 53 |
|                                       |                 |        | 1996   | 4,843  | 2,046  | 6,309  | 28     | 69.05  | 29.17  | 89.95  | 53 |
|                                       |                 |        | 1997   | 5,061  | 2,192  | 6,399  | 27     | 70.52  | 30.55  | 89.18  | 51 |
|                                       |                 |        | 1998   | 5,414  | 2,353  | 6,523  | 26     | 73.68  | 32.03  | 88.78  | 49 |
|                                       |                 |        | 1999   | 6,856  | 6,603  | 7,020  | 20     | 91.49  | 88.11  | 93.68  | 32 |
|                                       |                 |        | 2000   | 6,224  | 2,681  | 7,751  | 22     | 81.28  | 35.01  | 101.22 | 40 |
|                                       | 2001            |        | 7,925  | 6,836  | 8,620  | 18     | 101.25 | 87.34  | 110.13 | 25     |    |
|                                       | 2002            | 6,955  | 2,677  | 9,849  | 20     | 86.90  | 33.45  | 123.06 | 31     |        |    |
|                                       | 2003            | 7,186  | 2,659  | 11,149 | 20     | 87.94  | 32.54  | 136.43 | 28     |        |    |
|                                       | 2004            | 7,434  | 2,644  | 12,726 | 18     | 88.57  | 31.50  | 151.62 | 26     |        |    |
|                                       | 2005            | 7,667  | 2,605  | 14,405 | 16     | 88.87  | 30.20  | 166.96 | 24     |        |    |
|                                       | 2006            | 7,834  | 2,534  | 16,103 | 15     | 88.86  | 28.75  | 182.65 | 23     |        |    |
|                                       | 2007            | 7,880  | 2,409  | 17,648 | 15     | 88.56  | 27.07  | 198.33 | 24     |        |    |

| Metropolitan Statistical Area         | PWID Population | Year  | Number      | Min    | Max    | Rank  | Rate   | Min    | Max    | Rank   |        |    |
|---------------------------------------|-----------------|-------|-------------|--------|--------|-------|--------|--------|--------|--------|--------|----|
| Tampa--St. Petersburg--Clearwater, FL | Young (15-29)   | 1992  | 3,728       | 2,885  | 4,232  | 35    | 94.42  | 73.07  | 107.20 | 46     |        |    |
|                                       |                 | 1993  | 2,946       | 1,069  | 4,028  | 40    | 75.63  | 27.45  | 103.43 | 53     |        |    |
|                                       |                 | 1994  | 3,543       | 2,881  | 3,963  | 31    | 92.08  | 74.88  | 102.98 | 43     |        |    |
|                                       |                 | 1995  | 3,029       | 1,227  | 4,020  | 33    | 78.81  | 31.94  | 104.59 | 54     |        |    |
|                                       |                 | 1996  | 3,191       | 1,348  | 4,156  | 32    | 82.68  | 34.92  | 107.70 | 53     |        |    |
|                                       |                 | 1997  | 3,478       | 1,507  | 4,398  | 31    | 88.64  | 38.40  | 112.08 | 47     |        |    |
|                                       |                 | 1998  | 3,913       | 1,701  | 4,715  | 26    | 97.79  | 42.51  | 117.83 | 44     |        |    |
|                                       |                 | 1999  | 5,230       | 5,036  | 5,355  | 18    | 128.82 | 124.06 | 131.91 | 28     |        |    |
|                                       |                 | 2000  | 5,009       | 2,157  | 6,238  | 21    | 121.64 | 52.39  | 151.48 | 31     |        |    |
|                                       |                 | 2001  | 6,703       | 5,782  | 7,291  | 15    | 160.12 | 138.12 | 174.16 | 17     |        |    |
|                                       |                 | 2002  | 6,140       | 2,363  | 8,695  | 15    | 143.81 | 55.36  | 203.65 | 22     |        |    |
|                                       |                 | 2003  | 6,559       | 2,427  | 10,177 | 16    | 149.61 | 55.36  | 232.12 | 22     |        |    |
|                                       |                 | 2004  | 6,936       | 2,467  | 11,874 | 15    | 152.36 | 54.18  | 260.81 | 22     |        |    |
|                                       |                 | 2005  | 7,215       | 2,452  | 13,556 | 14    | 153.01 | 51.99  | 287.46 | 22     |        |    |
|                                       |                 | 2006  | 7,322       | 2,369  | 15,051 | 15    | 150.05 | 48.54  | 308.44 | 22     |        |    |
|                                       |                 | 2007  | 7,187       | 2,197  | 16,094 | 15    | 144.72 | 44.24  | 324.09 | 24     |        |    |
|                                       |                 |       | Old (30-64) | 1992   | 12,004 | 9,290 | 13,629 | 31     | 132.98 | 102.92 | 150.98 | 45 |
|                                       |                 |       |             | 1993   | 9,860  | 3,579 | 13,485 | 32     | 107.06 | 38.86  | 146.41 | 52 |
|                                       |                 |       |             | 1994   | 11,857 | 9,642 | 13,260 | 29     | 125.69 | 102.21 | 140.57 | 44 |
|                                       |                 |       |             | 1995   | 9,798  | 3,971 | 13,003 | 29     | 101.20 | 41.01  | 134.30 | 54 |
| 1996                                  | 9,706           |       |             | 4,100  | 12,644 | 29    | 98.12  | 41.45  | 127.82 | 58     |        |    |
| 1997                                  | 9,732           |       |             | 4,216  | 12,305 | 29    | 95.78  | 41.49  | 121.11 | 58     |        |    |
| 1998                                  | 9,904           |       |             | 4,306  | 11,934 | 29    | 95.03  | 41.31  | 114.50 | 58     |        |    |
| 1999                                  | 11,848          |       |             | 11,410 | 12,131 | 26    | 111.12 | 107.02 | 113.78 | 48     |        |    |
| 2000                                  | 10,108          |       |             | 4,354  | 12,587 | 28    | 92.47  | 39.83  | 115.16 | 56     |        |    |
| 2001                                  | 12,063          |       |             | 10,405 | 13,120 | 24    | 107.70 | 92.91  | 117.15 | 47     |        |    |
| 2002                                  | 9,926           |       |             | 3,821  | 14,056 | 27    | 86.56  | 33.32  | 122.58 | 56     |        |    |
| 2003                                  | 9,656           |       |             | 3,573  | 14,981 | 26    | 82.59  | 30.56  | 128.14 | 55     |        |    |
| 2004                                  | 9,483           |       |             | 3,373  | 16,233 | 27    | 79.16  | 28.15  | 135.51 | 54     |        |    |
| 2005                                  | 9,400           |       |             | 3,194  | 17,660 | 27    | 76.46  | 25.98  | 143.65 | 55     |        |    |
| 2006                                  | 9,383           | 3,035 | 19,287      | 27     | 74.97  | 24.25 | 154.10 | 55     |        |        |        |    |
| 2007                                  | 9,403           | 2,875 | 21,057      | 27     | 74.50  | 22.78 | 166.84 | 55     |        |        |        |    |

| Metropolitan Statistical Area | PWID Population | Year | Number             | Min   | Max   | Rank  | Rate  | Min   | Max    | Rank  |       |    |
|-------------------------------|-----------------|------|--------------------|-------|-------|-------|-------|-------|--------|-------|-------|----|
| Toledo, OH                    | Total           | 1992 | 2,670              | 2,099 | 3,015 | 93    | 66.35 | 52.15 | 74.92  | 84    |       |    |
|                               |                 | 1993 | 2,267              | 1,189 | 2,940 | 95    | 56.39 | 29.57 | 73.14  | 86    |       |    |
|                               |                 | 1994 | 2,582              | 2,124 | 2,991 | 94    | 64.24 | 52.84 | 74.42  | 83    |       |    |
|                               |                 | 1995 | 2,203              | 1,180 | 3,051 | 95    | 54.67 | 29.27 | 75.70  | 88    |       |    |
|                               |                 | 1996 | 2,176              | 1,176 | 3,121 | 95    | 53.89 | 29.12 | 77.30  | 88    |       |    |
|                               |                 | 1997 | 2,113              | 1,171 | 3,196 | 95    | 52.15 | 28.91 | 78.90  | 89    |       |    |
|                               |                 | 1998 | 2,055              | 1,167 | 3,295 | 95    | 50.57 | 28.71 | 81.09  | 90    |       |    |
|                               |                 | 1999 | 2,303              | 1,649 | 3,389 | 94    | 56.60 | 40.53 | 83.29  | 85    |       |    |
|                               |                 | 2000 | 2,020              | 1,207 | 3,496 | 98    | 49.56 | 29.61 | 85.75  | 92    |       |    |
|                               |                 | 2001 | 2,324              | 1,635 | 3,612 | 95    | 56.75 | 39.93 | 88.21  | 86    |       |    |
|                               |                 | 2002 | 2,133              | 1,284 | 3,749 | 96    | 51.94 | 31.25 | 91.29  | 89    |       |    |
|                               |                 | 2003 | 2,256              | 1,321 | 3,886 | 95    | 54.79 | 32.08 | 94.38  | 84    |       |    |
|                               |                 | 2004 | 2,415              | 1,333 | 4,020 | 95    | 58.54 | 32.32 | 97.46  | 79    |       |    |
|                               |                 | 2005 | 2,568              | 1,243 | 4,152 | 95    | 62.18 | 30.11 | 100.55 | 75    |       |    |
|                               |                 | 2006 | 2,721              | 1,156 | 4,272 | 93    | 66.02 | 28.04 | 103.63 | 72    |       |    |
|                               |                 | 2007 | 2,865              | 1,071 | 4,658 | 93    | 69.47 | 25.98 | 112.96 | 70    |       |    |
|                               |                 |      | Non-Hispanic White | 1992  | 1,313 | 1,032 | 1,483 | 96    | 38.74  | 30.45 | 43.74 | 87 |
|                               |                 |      |                    | 1993  | 1,165 | 611   | 1,511 | 97    | 34.51  | 18.10 | 44.77 | 87 |
|                               |                 |      |                    | 1994  | 1,371 | 1,128 | 1,588 | 96    | 40.77  | 33.54 | 47.24 | 84 |
|                               |                 |      |                    | 1995  | 1,200 | 643   | 1,662 | 97    | 35.71  | 19.12 | 49.45 | 85 |
| 1996                          | 1,209           |      |                    | 653   | 1,734 | 96    | 36.04 | 19.47 | 51.69  | 86    |       |    |
| 1997                          | 1,192           |      |                    | 661   | 1,803 | 96    | 35.54 | 19.70 | 53.76  | 85    |       |    |
| 1998                          | 1,175           |      |                    | 667   | 1,883 | 95    | 35.01 | 19.87 | 56.14  | 86    |       |    |
| 1999                          | 1,332           |      |                    | 954   | 1,960 | 95    | 39.79 | 28.49 | 58.55  | 82    |       |    |
| 2000                          | 1,182           |      |                    | 706   | 2,045 | 96    | 35.40 | 21.15 | 61.24  | 85    |       |    |
| 2001                          | 1,377           |      |                    | 969   | 2,140 | 96    | 41.17 | 28.97 | 63.99  | 83    |       |    |
| 2002                          | 1,282           |      |                    | 771   | 2,253 | 96    | 38.35 | 23.07 | 67.40  | 85    |       |    |
| 2003                          | 1,379           |      |                    | 807   | 2,376 | 96    | 41.26 | 24.16 | 71.09  | 84    |       |    |
| 2004                          | 1,507           |      |                    | 832   | 2,509 | 96    | 45.12 | 24.91 | 75.13  | 82    |       |    |
| 2005                          | 1,642           |      |                    | 795   | 2,654 | 95    | 49.27 | 23.86 | 79.67  | 78    |       |    |
| 2006                          | 1,790           |      |                    | 760   | 2,809 | 92    | 53.99 | 22.93 | 84.75  | 73    |       |    |
| 2007                          | 1,945           | 727  | 3,162              | 88    | 58.85 | 22.01 | 95.69 | 67    |        |       |       |    |

| Metropolitan Statistical Area | PWID Population    | Year | Number   | Min  | Max   | Rank  | Rate   | Min    | Max    | Rank   |        |    |
|-------------------------------|--------------------|------|----------|------|-------|-------|--------|--------|--------|--------|--------|----|
| Toledo, OH                    | Non-Hispanic Black | 1992 | 1,081    | 850  | 1,220 | 75    | 242.77 | 190.81 | 274.11 | 63     |        |    |
|                               |                    | 1993 | 869      | 456  | 1,127 | 82    | 192.51 | 100.95 | 249.71 | 69     |        |    |
|                               |                    | 1994 | 943      | 776  | 1,093 | 79    | 206.21 | 169.63 | 238.92 | 69     |        |    |
|                               |                    | 1995 | 771      | 413  | 1,068 | 82    | 165.91 | 88.83  | 229.74 | 74     |        |    |
|                               |                    | 1996 | 733      | 396  | 1,052 | 82    | 155.26 | 83.88  | 222.69 | 75     |        |    |
|                               |                    | 1997 | 687      | 381  | 1,039 | 81    | 142.94 | 79.24  | 216.25 | 76     |        |    |
|                               |                    | 1998 | 646      | 366  | 1,035 | 81    | 132.56 | 75.25  | 212.56 | 76     |        |    |
|                               |                    | 1999 | 699      | 500  | 1,028 | 78    | 141.30 | 101.18 | 207.92 | 73     |        |    |
|                               |                    | 2000 | 591      | 353  | 1,022 | 81    | 117.40 | 70.14  | 203.11 | 75     |        |    |
|                               |                    | 2001 | 653      | 459  | 1,015 | 78    | 127.50 | 89.72  | 198.18 | 74     |        |    |
|                               |                    | 2002 | 572      | 344  | 1,006 | 78    | 110.68 | 66.60  | 194.53 | 72     |        |    |
|                               |                    | 2003 | 574      | 336  | 989   | 77    | 109.89 | 64.34  | 189.30 | 69     |        |    |
|                               |                    | 2004 | 578      | 319  | 962   | 78    | 109.65 | 60.53  | 182.56 | 69     |        |    |
|                               |                    | 2005 | 572      | 277  | 925   | 78    | 107.11 | 51.87  | 173.18 | 69     |        |    |
|                               |                    | 2006 | 558      | 237  | 876   | 78    | 103.18 | 43.83  | 161.97 | 71     |        |    |
|                               |                    | 2007 | 535      | 200  | 870   | 82    | 97.97  | 36.64  | 159.30 | 74     |        |    |
|                               |                    |      | Hispanic | 1992 | 186   | 146   | 210    | 69     | 142.71 | 112.16 | 161.13 | 47 |
|                               |                    |      |          | 1993 | 157   | 82    | 204    | 69     | 116.71 | 61.20  | 151.39 | 48 |
|                               |                    |      |          | 1994 | 177   | 145   | 205    | 69     | 127.92 | 105.23 | 148.20 | 43 |
|                               |                    |      |          | 1995 | 148   | 79    | 205    | 71     | 103.48 | 55.41  | 143.30 | 49 |
| 1996                          | 142                |      |          | 77   | 204   | 71    | 96.23  | 51.99  | 138.02 | 49     |        |    |
| 1997                          | 134                |      |          | 74   | 202   | 73    | 88.17  | 48.88  | 133.39 | 51     |        |    |
| 1998                          | 125                |      |          | 71   | 201   | 74    | 80.55  | 45.73  | 129.17 | 52     |        |    |
| 1999                          | 135                |      |          | 97   | 199   | 74    | 84.88  | 60.78  | 124.90 | 54     |        |    |
| 2000                          | 114                |      |          | 68   | 198   | 75    | 69.24  | 41.37  | 119.79 | 57     |        |    |
| 2001                          | 127                |      |          | 89   | 197   | 75    | 74.84  | 52.66  | 116.32 | 58     |        |    |
| 2002                          | 113                |      |          | 68   | 198   | 78    | 64.54  | 38.84  | 113.44 | 59     |        |    |
| 2003                          | 116                |      |          | 68   | 200   | 79    | 64.67  | 37.86  | 111.40 | 59     |        |    |
| 2004                          | 122                |      |          | 68   | 204   | 79    | 66.35  | 36.63  | 110.48 | 57     |        |    |
| 2005                          | 129                |      |          | 63   | 209   | 79    | 68.87  | 33.35  | 111.36 | 55     |        |    |
| 2006                          | 138                | 59   | 217      | 81   | 72.35 | 30.73 | 113.57 | 53     |        |        |        |    |
| 2007                          | 149                | 56   | 242      | 79   | 76.02 | 28.43 | 123.61 | 52     |        |        |        |    |

| Metropolitan Statistical Area | PWID Population | Year   | Number | Min   | Max   | Rank  | Rate  | Min    | Max    | Rank  |    |
|-------------------------------|-----------------|--------|--------|-------|-------|-------|-------|--------|--------|-------|----|
| Toledo, OH                    | Male            | 1992   | 1,717  | 1,350 | 1,939 | 95    | 87.65 | 68.89  | 98.96  | 86    |    |
|                               |                 | 1993   | 1,399  | 734   | 1,815 | 96    | 71.40 | 37.44  | 92.61  | 91    |    |
|                               |                 | 1994   | 1,542  | 1,268 | 1,786 | 96    | 78.65 | 64.70  | 91.12  | 87    |    |
|                               |                 | 1995   | 1,285  | 688   | 1,779 | 97    | 65.29 | 34.96  | 90.41  | 93    |    |
|                               |                 | 1996   | 1,250  | 675   | 1,793 | 97    | 63.35 | 34.22  | 90.86  | 93    |    |
|                               |                 | 1997   | 1,204  | 668   | 1,822 | 97    | 60.82 | 33.72  | 92.02  | 93    |    |
|                               |                 | 1998   | 1,171  | 665   | 1,878 | 98    | 58.95 | 33.46  | 94.52  | 95    |    |
|                               |                 | 1999   | 1,319  | 944   | 1,940 | 97    | 66.23 | 47.43  | 97.45  | 88    |    |
|                               |                 | 2000   | 1,167  | 697   | 2,019 | 99    | 58.50 | 34.95  | 101.20 | 94    |    |
|                               |                 | 2001   | 1,358  | 956   | 2,111 | 97    | 67.66 | 47.61  | 105.17 | 88    |    |
|                               |                 | 2002   | 1,263  | 760   | 2,219 | 99    | 62.67 | 37.71  | 110.16 | 91    |    |
|                               |                 | 2003   | 1,352  | 792   | 2,329 | 97    | 66.89 | 39.16  | 115.23 | 87    |    |
|                               |                 | 2004   | 1,464  | 808   | 2,437 | 95    | 72.22 | 39.87  | 120.25 | 79    |    |
|                               |                 | 2005   | 1,571  | 761   | 2,540 | 93    | 77.32 | 37.45  | 125.03 | 76    |    |
|                               | 2006            | 1,674  | 711    | 2,627 | 92    | 82.41 | 35.00 | 129.36 | 71     |       |    |
|                               | 2007            | 1,763  | 659    | 2,867 | 92    | 86.72 | 32.43 | 141.01 | 67     |       |    |
|                               |                 | Female | 1992   | 991   | 779   | 1,119 | 89    | 48.02  | 37.74  | 54.21 | 78 |
|                               |                 |        | 1993   | 899   | 471   | 1,166 | 89    | 43.62  | 22.88  | 56.59 | 82 |
|                               |                 |        | 1994   | 1,074 | 883   | 1,244 | 88    | 52.17  | 42.92  | 60.45 | 76 |
|                               |                 |        | 1995   | 947   | 507   | 1,312 | 89    | 45.94  | 24.60  | 63.61 | 80 |
|                               |                 |        | 1996   | 955   | 516   | 1,370 | 88    | 46.27  | 25.00  | 66.36 | 79 |
|                               |                 |        | 1997   | 937   | 520   | 1,418 | 91    | 45.26  | 25.09  | 68.48 | 79 |
|                               |                 |        | 1998   | 914   | 519   | 1,465 | 92    | 43.99  | 24.97  | 70.53 | 78 |
|                               |                 |        | 1999   | 1,019 | 730   | 1,500 | 89    | 49.04  | 35.12  | 72.17 | 80 |
|                               |                 |        | 2000   | 885   | 529   | 1,531 | 96    | 42.53  | 25.41  | 73.57 | 82 |
|                               |                 |        | 2001   | 1,004 | 706   | 1,560 | 94    | 48.07  | 33.83  | 74.72 | 81 |
|                               | 2002            |        | 906    | 545   | 1,593 | 96    | 43.30 | 26.06  | 76.11  | 83    |    |
|                               | 2003            |        | 941    | 551   | 1,621 | 96    | 44.91 | 26.29  | 77.36  | 81    |    |
|                               | 2004            | 990    | 547    | 1,649 | 95    | 47.20 | 26.06 | 78.59  | 77     |       |    |
|                               | 2005            | 1,037  | 502    | 1,677 | 95    | 49.44 | 23.94 | 79.95  | 73     |       |    |
|                               | 2006            | 1,087  | 462    | 1,706 | 94    | 51.98 | 22.08 | 81.60  | 67     |       |    |
|                               | 2007            | 1,138  | 426    | 1,850 | 93    | 54.43 | 20.36 | 88.51  | 63     |       |    |



| Metropolitan Statistical Area | PWID Population | Year        | Number | Min   | Max   | Rank  | Rate  | Min    | Max    | Rank  |    |
|-------------------------------|-----------------|-------------|--------|-------|-------|-------|-------|--------|--------|-------|----|
| Toledo, OH                    | Young (15-29)   | 1992        | 598    | 470   | 675   | 95    | 40.92 | 32.16  | 46.20  | 91    |    |
|                               |                 | 1993        | 489    | 257   | 635   | 96    | 33.97 | 17.81  | 44.06  | 92    |    |
|                               |                 | 1994        | 540    | 444   | 625   | 94    | 38.04 | 31.30  | 44.08  | 89    |    |
|                               |                 | 1995        | 449    | 240   | 622   | 95    | 31.82 | 17.04  | 44.06  | 92    |    |
|                               |                 | 1996        | 436    | 236   | 625   | 95    | 31.03 | 16.76  | 44.51  | 92    |    |
|                               |                 | 1997        | 420    | 233   | 636   | 95    | 29.97 | 16.62  | 45.34  | 93    |    |
|                               |                 | 1998        | 410    | 233   | 658   | 98    | 29.24 | 16.60  | 46.88  | 98    |    |
|                               |                 | 1999        | 467    | 334   | 687   | 99    | 33.53 | 24.01  | 49.34  | 97    |    |
|                               |                 | 2000        | 422    | 252   | 729   | 100   | 30.49 | 18.21  | 52.75  | 100   |    |
|                               |                 | 2001        | 507    | 357   | 788   | 100   | 36.74 | 25.85  | 57.10  | 99    |    |
|                               |                 | 2002        | 494    | 297   | 868   | 100   | 35.79 | 21.54  | 62.91  | 100   |    |
|                               |                 | 2003        | 563    | 330   | 970   | 100   | 40.78 | 23.88  | 70.26  | 100   |    |
|                               |                 | 2004        | 660    | 365   | 1,099 | 100   | 47.67 | 26.32  | 79.37  | 96    |    |
|                               |                 | 2005        | 781    | 378   | 1,263 | 100   | 56.20 | 27.22  | 90.87  | 91    |    |
|                               |                 | 2006        | 933    | 396   | 1,465 | 97    | 67.40 | 28.63  | 105.80 | 79    |    |
|                               | 2007            | 1,118       | 418    | 1,818 | 91    | 80.61 | 30.15 | 131.06 | 62     |       |    |
|                               |                 | Old (30-64) | 1992   | 2,128 | 1,673 | 2,403 | 92    | 83.03  | 65.26  | 93.75 | 78 |
|                               |                 |             | 1993   | 1,821 | 955   | 2,362 | 93    | 70.57  | 37.01  | 91.54 | 83 |
|                               |                 |             | 1994   | 2,086 | 1,716 | 2,417 | 93    | 80.23  | 66.00  | 92.95 | 81 |
|                               |                 |             | 1995   | 1,788 | 957   | 2,476 | 93    | 68.29  | 36.57  | 94.57 | 82 |
|                               | 1996            |             | 1,771  | 957   | 2,540 | 93    | 67.27 | 36.35  | 96.49  | 81    |    |
|                               | 1997            |             | 1,720  | 954   | 2,603 | 94    | 64.93 | 36.00  | 98.24  | 81    |    |
|                               | 1998            |             | 1,671  | 948   | 2,679 | 94    | 62.77 | 35.63  | 100.65 | 81    |    |
|                               | 1999            |             | 1,864  | 1,335 | 2,743 | 93    | 69.62 | 49.85  | 102.44 | 78    |    |
|                               | 2000            |             | 1,623  | 970   | 2,808 | 94    | 60.26 | 36.00  | 104.25 | 79    |    |
|                               | 2001            |             | 1,847  | 1,300 | 2,871 | 93    | 68.02 | 47.87  | 105.73 | 77    |    |
|                               | 2002            | 1,671       | 1,006  | 2,937 | 92    | 61.27 | 36.87 | 107.70 | 75     |       |    |
|                               | 2003            | 1,734       | 1,015  | 2,988 | 91    | 63.37 | 37.10 | 109.17 | 68     |       |    |
|                               | 2004            | 1,812       | 1,000  | 3,017 | 91    | 66.15 | 36.52 | 110.14 | 65     |       |    |
|                               | 2005            | 1,869       | 905    | 3,022 | 89    | 68.23 | 33.04 | 110.32 | 61     |       |    |
|                               | 2006            | 1,905       | 809    | 2,991 | 89    | 69.59 | 29.56 | 109.24 | 60     |       |    |
|                               | 2007            | 1,908       | 714    | 3,103 | 89    | 69.73 | 26.08 | 113.39 | 57     |       |    |

| Metropolitan Statistical Area | PWID Population | Year  | Number             | Min    | Max    | Rank  | Rate   | Min    | Max    | Rank   |        |    |
|-------------------------------|-----------------|-------|--------------------|--------|--------|-------|--------|--------|--------|--------|--------|----|
| Tucson, AZ                    | Total           | 1992  | 10,572             | 8,550  | 12,176 | 42    | 234.55 | 189.68 | 270.13 | 11     |        |    |
|                               |                 | 1993  | 10,798             | 9,213  | 12,036 | 40    | 232.52 | 198.40 | 259.18 | 6      |        |    |
|                               |                 | 1994  | 11,006             | 10,042 | 12,037 | 42    | 227.05 | 207.15 | 248.31 | 8      |        |    |
|                               |                 | 1995  | 11,272             | 10,819 | 11,881 | 36    | 225.28 | 216.23 | 237.44 | 7      |        |    |
|                               |                 | 1996  | 11,291             | 10,527 | 11,569 | 34    | 221.29 | 206.31 | 226.73 | 7      |        |    |
|                               |                 | 1997  | 11,359             | 10,258 | 12,320 | 33    | 217.22 | 196.16 | 235.59 | 6      |        |    |
|                               |                 | 1998  | 11,321             | 9,766  | 13,056 | 35    | 213.23 | 183.95 | 245.91 | 6      |        |    |
|                               |                 | 1999  | 11,276             | 9,287  | 13,880 | 36    | 208.52 | 171.74 | 256.69 | 7      |        |    |
|                               |                 | 2000  | 11,424             | 8,817  | 14,842 | 35    | 206.24 | 159.17 | 267.93 | 7      |        |    |
|                               |                 | 2001  | 11,523             | 8,294  | 15,823 | 36    | 203.67 | 146.60 | 279.67 | 6      |        |    |
|                               |                 | 2002  | 11,804             | 7,784  | 16,927 | 35    | 203.57 | 134.24 | 291.92 | 7      |        |    |
|                               |                 | 2003  | 12,123             | 7,208  | 18,020 | 35    | 205.00 | 121.89 | 304.71 | 7      |        |    |
|                               |                 | 2004  | 12,673             | 6,571  | 19,264 | 33    | 209.23 | 108.48 | 318.07 | 7      |        |    |
|                               |                 | 2005  | 13,275             | 5,910  | 20,636 | 31    | 213.57 | 95.08  | 332.00 | 7      |        |    |
|                               |                 | 2006  | 13,962             | 5,214  | 22,130 | 29    | 218.57 | 81.63  | 346.44 | 7      |        |    |
|                               |                 | 2007  | 14,575             | 4,443  | 23,523 | 27    | 223.64 | 68.17  | 360.93 | 7      |        |    |
|                               |                 |       | Non-Hispanic White | 1992   | 5,225  | 4,226 | 6,018  | 46     | 172.48 | 139.49 | 198.65 | 14 |
|                               |                 |       |                    | 1993   | 5,073  | 4,328 | 5,654  | 42     | 164.24 | 140.14 | 183.07 | 14 |
|                               |                 |       |                    | 1994   | 4,951  | 4,517 | 5,414  | 47     | 154.81 | 141.25 | 169.31 | 15 |
|                               |                 |       |                    | 1995   | 4,900  | 4,703 | 5,165  | 42     | 149.78 | 143.76 | 157.87 | 13 |
| 1996                          | 4,797           |       |                    | 4,472  | 4,915  | 44    | 145.23 | 135.40 | 148.81 | 13     |        |    |
| 1997                          | 4,777           |       |                    | 4,314  | 5,181  | 41    | 142.21 | 128.42 | 154.23 | 13     |        |    |
| 1998                          | 4,781           |       |                    | 4,125  | 5,514  | 39    | 141.39 | 121.97 | 163.06 | 11     |        |    |
| 1999                          | 4,856           |       |                    | 3,999  | 5,978  | 43    | 142.10 | 117.03 | 174.92 | 13     |        |    |
| 2000                          | 5,096           |       |                    | 3,933  | 6,621  | 37    | 147.01 | 113.46 | 190.99 | 9      |        |    |
| 2001                          | 5,406           |       |                    | 3,891  | 7,424  | 38    | 154.07 | 110.89 | 211.56 | 9      |        |    |
| 2002                          | 5,905           |       |                    | 3,894  | 8,469  | 35    | 165.68 | 109.26 | 237.59 | 7      |        |    |
| 2003                          | 6,541           |       |                    | 3,889  | 9,723  | 29    | 181.55 | 107.95 | 269.87 | 6      |        |    |
| 2004                          | 7,433           |       |                    | 3,854  | 11,299 | 27    | 202.86 | 105.18 | 308.37 | 5      |        |    |
| 2005                          | 8,497           |       |                    | 3,783  | 13,210 | 24    | 227.66 | 101.36 | 353.92 | 4      |        |    |
| 2006                          | 9,750           | 3,641 | 15,453             | 20     | 256.55 | 95.81 | 406.63 | 2      |        |        |        |    |
| 2007                          | 11,052          | 3,369 | 17,836             | 18     | 287.87 | 87.75 | 464.59 | 1      |        |        |        |    |

| Metropolitan Statistical Area | PWID Population    | Year | Number   | Min   | Max    | Rank  | Rate   | Min    | Max    | Rank   |        |    |
|-------------------------------|--------------------|------|----------|-------|--------|-------|--------|--------|--------|--------|--------|----|
| Tucson, AZ                    | Non-Hispanic Black | 1992 | 1,055    | 853   | 1,215  | 76    | 772.92 | 625.06 | 890.16 | 4      |        |    |
|                               |                    | 1993 | 983      | 839   | 1,096  | 74    | 701.63 | 598.65 | 782.05 | 7      |        |    |
|                               |                    | 1994 | 907      | 827   | 992    | 80    | 609.57 | 556.16 | 666.66 | 5      |        |    |
|                               |                    | 1995 | 836      | 803   | 881    | 76    | 538.09 | 516.47 | 567.15 | 9      |        |    |
|                               |                    | 1996 | 753      | 702   | 772    | 80    | 467.75 | 436.10 | 479.26 | 11     |        |    |
|                               |                    | 1997 | 683      | 617   | 741    | 82    | 411.19 | 371.32 | 445.96 | 11     |        |    |
|                               |                    | 1998 | 619      | 534   | 714    | 83    | 365.51 | 315.31 | 421.53 | 11     |        |    |
|                               |                    | 1999 | 568      | 467   | 699    | 84    | 328.13 | 270.25 | 403.92 | 15     |        |    |
|                               |                    | 2000 | 538      | 415   | 699    | 83    | 301.76 | 232.88 | 392.02 | 13     |        |    |
|                               |                    | 2001 | 519      | 373   | 712    | 83    | 282.82 | 203.57 | 388.36 | 17     |        |    |
|                               |                    | 2002 | 521      | 344   | 747    | 84    | 275.93 | 181.96 | 395.69 | 14     |        |    |
|                               |                    | 2003 | 541      | 322   | 804    | 81    | 280.74 | 166.92 | 417.29 | 15     |        |    |
|                               |                    | 2004 | 592      | 307   | 899    | 77    | 295.92 | 153.43 | 449.84 | 14     |        |    |
|                               |                    | 2005 | 674      | 300   | 1,048  | 75    | 327.59 | 145.85 | 509.27 | 12     |        |    |
|                               |                    | 2006 | 806      | 301   | 1,277  | 73    | 372.02 | 138.93 | 589.66 | 11     |        |    |
|                               |                    | 2007 | 1,004    | 306   | 1,620  | 66    | 448.04 | 136.57 | 723.09 | 8      |        |    |
|                               |                    |      | Hispanic | 1992  | 2,936  | 2,375 | 3,382  | 27     | 259.96 | 210.23 | 299.40 | 23 |
|                               |                    |      |          | 1993  | 3,079  | 2,627 | 3,431  | 27     | 258.49 | 220.55 | 288.12 | 21 |
|                               |                    |      |          | 1994  | 3,210  | 2,929 | 3,511  | 26     | 254.10 | 231.83 | 277.90 | 21 |
|                               |                    |      |          | 1995  | 3,348  | 3,213 | 3,528  | 22     | 252.42 | 242.28 | 266.05 | 17 |
| 1996                          | 3,395              |      |          | 3,165 | 3,479  | 22    | 246.40 | 229.72 | 252.46 | 16     |        |    |
| 1997                          | 3,435              |      |          | 3,102 | 3,726  | 22    | 239.89 | 216.63 | 260.17 | 15     |        |    |
| 1998                          | 3,416              |      |          | 2,947 | 3,939  | 23    | 231.16 | 199.41 | 266.59 | 16     |        |    |
| 1999                          | 3,364              |      |          | 2,771 | 4,142  | 18    | 220.51 | 181.61 | 271.44 | 16     |        |    |
| 2000                          | 3,337              |      |          | 2,575 | 4,335  | 23    | 209.66 | 161.80 | 272.37 | 17     |        |    |
| 2001                          | 3,256              |      |          | 2,344 | 4,471  | 22    | 197.06 | 141.84 | 270.59 | 18     |        |    |
| 2002                          | 3,185              |      |          | 2,100 | 4,567  | 23    | 184.99 | 121.99 | 265.28 | 18     |        |    |
| 2003                          | 3,077              |      |          | 1,829 | 4,573  | 24    | 172.32 | 102.46 | 256.13 | 18     |        |    |
| 2004                          | 2,974              |      |          | 1,542 | 4,521  | 24    | 160.83 | 83.39  | 244.49 | 19     |        |    |
| 2005                          | 2,827              |      |          | 1,258 | 4,394  | 25    | 147.05 | 65.47  | 228.59 | 23     |        |    |
| 2006                          | 2,641              |      |          | 986   | 4,186  | 28    | 131.74 | 49.20  | 208.81 | 25     |        |    |
| 2007                          | 2,394              | 730  | 3,863    | 28    | 115.21 | 35.12 | 185.93 | 28     |        |        |        |    |

| Metropolitan Statistical Area | PWID Population | Year   | Number | Min    | Max    | Rank   | Rate   | Min    | Max    | Rank   |    |
|-------------------------------|-----------------|--------|--------|--------|--------|--------|--------|--------|--------|--------|----|
| Tucson, AZ                    | Male            | 1992   | 7,856  | 6,353  | 9,048  | 38     | 351.27 | 284.07 | 404.55 | 4      |    |
|                               |                 | 1993   | 7,660  | 6,536  | 8,538  | 37     | 332.48 | 283.68 | 370.59 | 4      |    |
|                               |                 | 1994   | 7,466  | 6,812  | 8,165  | 40     | 310.56 | 283.35 | 339.65 | 6      |    |
|                               |                 | 1995   | 7,336  | 7,042  | 7,733  | 37     | 295.77 | 283.89 | 311.75 | 4      |    |
|                               |                 | 1996   | 7,086  | 6,606  | 7,260  | 37     | 280.36 | 261.39 | 287.26 | 7      |    |
|                               |                 | 1997   | 6,917  | 6,246  | 7,502  | 36     | 267.18 | 241.27 | 289.77 | 8      |    |
|                               |                 | 1998   | 6,738  | 5,812  | 7,770  | 36     | 256.68 | 221.43 | 296.02 | 8      |    |
|                               |                 | 1999   | 6,611  | 5,445  | 8,138  | 40     | 247.47 | 203.81 | 304.63 | 11     |    |
|                               |                 | 2000   | 6,654  | 5,135  | 8,644  | 37     | 243.14 | 187.65 | 315.87 | 8      |    |
|                               |                 | 2001   | 6,722  | 4,838  | 9,230  | 39     | 240.30 | 172.96 | 329.97 | 12     |    |
|                               |                 | 2002   | 6,953  | 4,585  | 9,971  | 36     | 242.52 | 159.92 | 347.78 | 8      |    |
|                               |                 | 2003   | 7,265  | 4,320  | 10,799 | 36     | 248.84 | 147.96 | 369.88 | 8      |    |
|                               |                 | 2004   | 7,778  | 4,033  | 11,824 | 35     | 259.85 | 134.73 | 395.01 | 7      |    |
|                               |                 | 2005   | 8,393  | 3,737  | 13,048 | 32     | 273.13 | 121.60 | 424.59 | 7      |    |
|                               | 2006            | 9,136  | 3,412  | 14,480 | 25     | 288.94 | 107.91 | 457.97 | 7      |        |    |
|                               | 2007            | 9,904  | 3,019  | 15,984 | 24     | 306.67 | 93.48  | 494.94 | 6      |        |    |
|                               |                 | Female | 1992   | 2,928  | 2,368  | 3,372  | 49     | 128.93 | 104.26 | 148.48 | 19 |
|                               |                 |        | 1993   | 3,300  | 2,815  | 3,678  | 41     | 141.02 | 120.32 | 157.18 | 14 |
|                               |                 |        | 1994   | 3,661  | 3,341  | 4,004  | 41     | 149.84 | 136.71 | 163.88 | 9  |
|                               |                 |        | 1995   | 4,030  | 3,868  | 4,247  | 34     | 159.70 | 153.28 | 168.32 | 6  |
|                               |                 |        | 1996   | 4,283  | 3,993  | 4,388  | 33     | 166.32 | 155.07 | 170.42 | 6  |
|                               |                 |        | 1997   | 4,517  | 4,079  | 4,899  | 33     | 171.05 | 154.47 | 185.52 | 5  |
|                               |                 |        | 1998   | 4,663  | 4,023  | 5,378  | 32     | 173.73 | 149.87 | 200.35 | 5  |
|                               |                 |        | 1999   | 4,756  | 3,917  | 5,855  | 35     | 173.85 | 143.18 | 214.00 | 5  |
|                               |                 |        | 2000   | 4,878  | 3,765  | 6,337  | 31     | 174.05 | 134.32 | 226.11 | 5  |
|                               |                 |        | 2001   | 4,923  | 3,543  | 6,760  | 33     | 172.11 | 123.88 | 236.33 | 5  |
|                               | 2002            |        | 4,984  | 3,286  | 7,147  | 27     | 170.01 | 112.11 | 243.80 | 4      |    |
|                               | 2003            |        | 4,992  | 2,968  | 7,421  | 28     | 166.74 | 99.14  | 247.84 | 5      |    |
|                               | 2004            | 5,018  | 2,602  | 7,627  | 27     | 163.79 | 84.92  | 248.99 | 5      |        |    |
|                               | 2005            | 4,973  | 2,214  | 7,730  | 28     | 158.23 | 70.44  | 245.98 | 5      |        |    |
|                               | 2006            | 4,859  | 1,815  | 7,702  | 31     | 150.63 | 56.25  | 238.75 | 6      |        |    |
|                               | 2007            | 4,617  | 1,407  | 7,451  | 34     | 140.42 | 42.80  | 226.63 | 6      |        |    |

| Metropolitan Statistical Area | PWID Population | Year        | Number | Min    | Max    | Rank   | Rate   | Min    | Max    | Rank   |   |
|-------------------------------|-----------------|-------------|--------|--------|--------|--------|--------|--------|--------|--------|---|
| Tucson, AZ                    | Young (15-29)   | 1992        | 2,657  | 2,149  | 3,060  | 43     | 165.56 | 133.89 | 190.67 | 14     |   |
|                               |                 | 1993        | 2,554  | 2,179  | 2,847  | 41     | 157.20 | 134.13 | 175.22 | 14     |   |
|                               |                 | 1994        | 2,491  | 2,273  | 2,724  | 41     | 149.51 | 136.41 | 163.51 | 16     |   |
|                               |                 | 1995        | 2,483  | 2,383  | 2,617  | 42     | 145.74 | 139.89 | 153.61 | 14     |   |
|                               |                 | 1996        | 2,460  | 2,294  | 2,521  | 42     | 142.38 | 132.74 | 145.88 | 16     |   |
|                               |                 | 1997        | 2,487  | 2,246  | 2,697  | 42     | 141.09 | 127.41 | 153.02 | 15     |   |
|                               |                 | 1998        | 2,528  | 2,180  | 2,915  | 41     | 141.48 | 122.05 | 163.16 | 15     |   |
|                               |                 | 1999        | 2,603  | 2,144  | 3,204  | 46     | 143.62 | 118.28 | 176.79 | 17     |   |
|                               |                 | 2000        | 2,762  | 2,132  | 3,588  | 42     | 149.42 | 115.31 | 194.11 | 18     |   |
|                               |                 | 2001        | 2,951  | 2,124  | 4,052  | 44     | 157.16 | 113.12 | 215.81 | 18     |   |
|                               |                 | 2002        | 3,234  | 2,133  | 4,638  | 38     | 168.61 | 111.19 | 241.80 | 16     |   |
|                               |                 | 2003        | 3,583  | 2,131  | 5,326  | 35     | 183.73 | 109.24 | 273.10 | 15     |   |
|                               |                 | 2004        | 4,068  | 2,109  | 6,183  | 32     | 203.72 | 105.62 | 309.68 | 12     |   |
|                               |                 | 2005        | 4,648  | 2,069  | 7,225  | 26     | 227.93 | 101.48 | 354.34 | 7      |   |
|                               |                 | 2006        | 5,346  | 1,996  | 8,473  | 21     | 255.56 | 95.44  | 405.06 | 5      |   |
|                               | 2007            | 6,106       | 1,861  | 9,854  | 18     | 286.38 | 87.29  | 462.19 | 2      |        |   |
|                               |                 | Old (30-64) | 1992   | 8,043  | 6,504  | 9,263  | 40     | 277.08 | 224.07 | 319.11 | 5 |
|                               |                 |             | 1993   | 8,326  | 7,104  | 9,281  | 38     | 275.76 | 235.29 | 307.37 | 6 |
|                               |                 |             | 1994   | 8,568  | 7,818  | 9,371  | 38     | 269.34 | 245.74 | 294.57 | 5 |
|                               |                 |             | 1995   | 8,829  | 8,474  | 9,306  | 35     | 267.54 | 256.79 | 281.99 | 5 |
|                               |                 |             | 1996   | 8,866  | 8,266  | 9,084  | 34     | 262.74 | 244.96 | 269.21 | 4 |
|                               |                 |             | 1997   | 8,911  | 8,047  | 9,665  | 34     | 257.04 | 232.12 | 278.78 | 5 |
|                               |                 |             | 1998   | 8,839  | 7,625  | 10,194 | 32     | 250.92 | 216.46 | 289.37 | 6 |
|                               |                 |             | 1999   | 8,726  | 7,186  | 10,741 | 35     | 242.73 | 199.91 | 298.79 | 6 |
|                               |                 |             | 2000   | 8,723  | 6,732  | 11,332 | 32     | 236.34 | 182.40 | 307.03 | 6 |
|                               | 2001            |             | 8,636  | 6,216  | 11,858 | 36     | 228.47 | 164.44 | 313.72 | 6      |   |
|                               | 2002            | 8,633       | 5,693  | 12,380 | 33     | 222.49 | 146.72 | 319.05 | 6      |        |   |
|                               | 2003            | 8,594       | 5,110  | 12,775 | 33     | 216.84 | 128.93 | 322.32 | 7      |        |   |
|                               | 2004            | 8,638       | 4,479  | 13,131 | 31     | 212.75 | 110.31 | 323.41 | 7      |        |   |
|                               | 2005            | 8,615       | 3,835  | 13,392 | 29     | 206.26 | 91.83  | 320.64 | 7      |        |   |
|                               | 2006            | 8,523       | 3,183  | 13,508 | 29     | 198.39 | 74.09  | 314.45 | 7      |        |   |
|                               | 2007            | 8,247       | 2,514  | 13,309 | 29     | 188.05 | 57.32  | 303.50 | 7      |        |   |

| Metropolitan Statistical Area | PWID Population | Year  | Number             | Min   | Max    | Rank  | Rate   | Min    | Max    | Rank  |        |    |
|-------------------------------|-----------------|-------|--------------------|-------|--------|-------|--------|--------|--------|-------|--------|----|
| Tulsa, OK                     | Total           | 1992  | 4,135              | 2,720 | 5,448  | 82    | 86.24  | 56.72  | 113.63 | 67    |        |    |
|                               |                 | 1993  | 4,223              | 3,149 | 5,452  | 81    | 87.13  | 64.97  | 112.48 | 58    |        |    |
|                               |                 | 1994  | 4,491              | 3,590 | 5,421  | 81    | 92.12  | 73.63  | 111.19 | 59    |        |    |
|                               |                 | 1995  | 4,477              | 3,910 | 5,391  | 82    | 91.27  | 79.72  | 109.90 | 54    |        |    |
|                               |                 | 1996  | 4,652              | 3,913 | 5,414  | 82    | 93.36  | 78.52  | 108.64 | 53    |        |    |
|                               |                 | 1997  | 4,840              | 3,915 | 5,447  | 80    | 95.42  | 77.18  | 107.38 | 50    |        |    |
|                               |                 | 1998  | 5,053              | 3,920 | 5,714  | 78    | 97.75  | 75.84  | 110.54 | 49    |        |    |
|                               |                 | 1999  | 5,718              | 5,260 | 6,340  | 71    | 108.62 | 99.92  | 120.44 | 44    |        |    |
|                               |                 | 2000  | 5,490              | 3,774 | 7,247  | 72    | 103.29 | 71.01  | 136.35 | 46    |        |    |
|                               |                 | 2001  | 6,412              | 5,511 | 8,171  | 67    | 119.48 | 102.70 | 152.26 | 36    |        |    |
|                               |                 | 2002  | 5,962              | 3,555 | 9,170  | 67    | 109.97 | 65.58  | 169.13 | 40    |        |    |
|                               |                 | 2003  | 6,158              | 3,418 | 10,114 | 66    | 113.26 | 62.86  | 186.00 | 36    |        |    |
|                               |                 | 2004  | 6,347              | 3,248 | 11,063 | 67    | 116.57 | 59.65  | 203.19 | 31    |        |    |
|                               |                 | 2005  | 6,577              | 3,115 | 12,080 | 64    | 119.98 | 56.83  | 220.38 | 27    |        |    |
|                               |                 | 2006  | 6,863              | 2,999 | 13,224 | 58    | 123.60 | 54.01  | 238.16 | 26    |        |    |
|                               |                 | 2007  | 7,176              | 2,910 | 14,424 | 58    | 127.33 | 51.63  | 255.94 | 24    |        |    |
|                               |                 |       | Non-Hispanic White | 1992  | 3,002  | 1,974 | 3,955  | 69     | 76.24  | 50.15 | 100.46 | 48 |
|                               |                 |       |                    | 1993  | 3,110  | 2,319 | 4,015  | 67     | 78.60  | 58.61 | 101.46 | 48 |
|                               |                 |       |                    | 1994  | 3,327  | 2,660 | 4,016  | 67     | 84.11  | 67.23 | 101.52 | 45 |
|                               |                 |       |                    | 1995  | 3,315  | 2,895 | 3,992  | 64     | 83.83  | 73.22 | 100.94 | 48 |
| 1996                          | 3,425           |       |                    | 2,881 | 3,986  | 64    | 85.89  | 72.23  | 99.95  | 45    |        |    |
| 1997                          | 3,529           |       |                    | 2,855 | 3,972  | 59    | 87.65  | 70.90  | 98.64  | 44    |        |    |
| 1998                          | 3,637           |       |                    | 2,822 | 4,113  | 55    | 89.44  | 69.39  | 101.14 | 41    |        |    |
| 1999                          | 4,054           |       |                    | 3,730 | 4,496  | 51    | 98.86  | 90.95  | 109.63 | 32    |        |    |
| 2000                          | 3,831           |       |                    | 2,634 | 5,057  | 53    | 93.30  | 64.15  | 123.17 | 36    |        |    |
| 2001                          | 4,404           |       |                    | 3,785 | 5,612  | 48    | 106.86 | 91.85  | 136.18 | 29    |        |    |
| 2002                          | 4,038           |       |                    | 2,408 | 6,211  | 49    | 97.54  | 58.16  | 150.01 | 33    |        |    |
| 2003                          | 4,127           |       |                    | 2,290 | 6,777  | 48    | 99.87  | 55.43  | 164.01 | 31    |        |    |
| 2004                          | 4,228           |       |                    | 2,164 | 7,369  | 49    | 102.71 | 52.56  | 179.03 | 32    |        |    |
| 2005                          | 4,383           |       |                    | 2,076 | 8,051  | 52    | 106.34 | 50.37  | 195.31 | 29    |        |    |
| 2006                          | 4,611           | 2,015 | 8,885              | 51    | 111.11 | 48.55 | 214.09 | 24     |        |       |        |    |
| 2007                          | 4,901           | 1,987 | 9,851              | 47    | 117.10 | 47.48 | 235.39 | 22     |        |       |        |    |

| Metropolitan Statistical Area | PWID Population    | Year | Number   | Min  | Max   | Rank  | Rate  | Min   | Max    | Rank  |       |    |
|-------------------------------|--------------------|------|----------|------|-------|-------|-------|-------|--------|-------|-------|----|
| Tulsa, OK                     | Non-Hispanic Black | 1992 | 358      | 236  | 472   | 95    | 94.01 | 61.84 | 123.88 | 98    |       |    |
|                               |                    | 1993 | 347      | 259  | 448   | 96    | 89.27 | 66.57 | 115.24 | 97    |       |    |
|                               |                    | 1994 | 344      | 275  | 415   | 96    | 86.85 | 69.42 | 104.83 | 97    |       |    |
|                               |                    | 1995 | 315      | 275  | 379   | 96    | 77.96 | 68.09 | 93.88  | 96    |       |    |
|                               |                    | 1996 | 297      | 250  | 346   | 96    | 71.64 | 60.26 | 83.37  | 96    |       |    |
|                               |                    | 1997 | 279      | 226  | 314   | 96    | 65.16 | 52.70 | 73.33  | 97    |       |    |
|                               |                    | 1998 | 262      | 204  | 297   | 95    | 59.10 | 45.85 | 66.83  | 98    |       |    |
|                               |                    | 1999 | 268      | 247  | 297   | 95    | 58.48 | 53.80 | 64.85  | 98    |       |    |
|                               |                    | 2000 | 234      | 161  | 309   | 95    | 49.72 | 34.19 | 65.64  | 98    |       |    |
|                               |                    | 2001 | 251      | 216  | 320   | 95    | 52.54 | 45.16 | 66.95  | 97    |       |    |
|                               |                    | 2002 | 218      | 130  | 335   | 95    | 44.73 | 26.67 | 68.79  | 98    |       |    |
|                               |                    | 2003 | 214      | 119  | 351   | 95    | 43.62 | 24.21 | 71.63  | 99    |       |    |
|                               |                    | 2004 | 215      | 110  | 375   | 95    | 43.35 | 22.19 | 75.57  | 99    |       |    |
|                               |                    | 2005 | 224      | 106  | 412   | 96    | 44.59 | 21.12 | 81.90  | 99    |       |    |
|                               |                    | 2006 | 244      | 107  | 471   | 96    | 47.62 | 20.81 | 91.75  | 95    |       |    |
|                               |                    | 2007 | 278      | 113  | 559   | 95    | 52.84 | 21.42 | 106.21 | 93    |       |    |
|                               |                    |      | Hispanic | 1992 | 75    | 49    | 99    | 79    | 66.30  | 43.61 | 87.37 | 75 |
|                               |                    |      |          | 1993 | 72    | 54    | 93    | 80    | 58.38  | 43.53 | 75.37 | 75 |
|                               |                    |      |          | 1994 | 73    | 58    | 88    | 82    | 53.78  | 42.98 | 64.91 | 79 |
|                               |                    |      |          | 1995 | 70    | 61    | 84    | 82    | 47.12  | 41.16 | 56.75 | 78 |
| 1996                          | 71                 |      |          | 59   | 82    | 82    | 42.68 | 35.90 | 49.67  | 80    |       |    |
| 1997                          | 72                 |      |          | 58   | 81    | 82    | 38.71 | 31.31 | 43.56  | 82    |       |    |
| 1998                          | 75                 |      |          | 58   | 84    | 82    | 35.56 | 27.59 | 40.22  | 81    |       |    |
| 1999                          | 84                 |      |          | 78   | 94    | 82    | 35.74 | 32.88 | 39.63  | 83    |       |    |
| 2000                          | 82                 |      |          | 56   | 108   | 82    | 31.72 | 21.81 | 41.87  | 81    |       |    |
| 2001                          | 97                 |      |          | 83   | 123   | 81    | 34.66 | 29.79 | 44.17  | 80    |       |    |
| 2002                          | 92                 |      |          | 55   | 141   | 82    | 30.56 | 18.23 | 47.00  | 81    |       |    |
| 2003                          | 98                 |      |          | 54   | 161   | 81    | 30.80 | 17.09 | 50.58  | 80    |       |    |
| 2004                          | 105                |      |          | 54   | 182   | 81    | 31.54 | 16.14 | 54.97  | 78    |       |    |
| 2005                          | 114                |      |          | 54   | 209   | 82    | 32.38 | 15.34 | 59.47  | 79    |       |    |
| 2006                          | 125                | 55   | 241      | 82   | 33.54 | 14.66 | 64.63 | 76    |        |       |       |    |
| 2007                          | 140                | 57   | 281      | 83   | 35.13 | 14.25 | 70.62 | 75    |        |       |       |    |

| Metropolitan Statistical Area | PWID Population | Year   | Number | Min   | Max   | Rank   | Rate   | Min    | Max    | Rank   |    |
|-------------------------------|-----------------|--------|--------|-------|-------|--------|--------|--------|--------|--------|----|
| Tulsa, OK                     | Male            | 1992   | 2,663  | 1,752 | 3,509 | 82     | 112.90 | 74.26  | 148.76 | 65     |    |
|                               |                 | 1993   | 2,666  | 1,988 | 3,441 | 82     | 111.64 | 83.25  | 144.12 | 62     |    |
|                               |                 | 1994   | 2,781  | 2,223 | 3,357 | 81     | 115.67 | 92.45  | 139.61 | 61     |    |
|                               |                 | 1995   | 2,723  | 2,379 | 3,279 | 82     | 112.40 | 98.18  | 135.35 | 59     |    |
|                               |                 | 1996   | 2,783  | 2,341 | 3,239 | 82     | 112.99 | 95.03  | 131.49 | 57     |    |
|                               |                 | 1997   | 2,850  | 2,305 | 3,207 | 83     | 113.67 | 91.94  | 127.92 | 55     |    |
|                               |                 | 1998   | 2,931  | 2,274 | 3,315 | 83     | 114.66 | 88.96  | 129.66 | 54     |    |
|                               |                 | 1999   | 3,270  | 3,008 | 3,626 | 80     | 125.56 | 115.51 | 139.23 | 49     |    |
|                               |                 | 2000   | 3,096  | 2,129 | 4,087 | 81     | 117.76 | 80.97  | 155.46 | 53     |    |
|                               |                 | 2001   | 3,568  | 3,066 | 4,546 | 76     | 134.08 | 115.25 | 170.87 | 46     |    |
|                               |                 | 2002   | 3,273  | 1,952 | 5,034 | 77     | 121.52 | 72.47  | 186.90 | 46     |    |
|                               |                 | 2003   | 3,334  | 1,851 | 5,476 | 75     | 123.50 | 68.54  | 202.82 | 44     |    |
|                               |                 | 2004   | 3,388  | 1,734 | 5,905 | 75     | 125.12 | 64.03  | 218.09 | 42     |    |
|                               |                 | 2005   | 3,459  | 1,638 | 6,353 | 71     | 126.86 | 60.09  | 233.01 | 43     |    |
|                               | 2006            | 3,552  | 1,552  | 6,844 | 72    | 128.71 | 56.24  | 248.00 | 40     |        |    |
|                               | 2007            | 3,649  | 1,480  | 7,336 | 73    | 130.12 | 52.76  | 261.55 | 37     |        |    |
|                               |                 | Female | 1992   | 1,585 | 1,042 | 2,088  | 75     | 65.05  | 42.79  | 85.71  | 59 |
|                               |                 |        | 1993   | 1,643 | 1,225 | 2,120  | 75     | 66.79  | 49.80  | 86.21  | 51 |
|                               |                 |        | 1994   | 1,777 | 1,420 | 2,145  | 75     | 71.92  | 57.49  | 86.81  | 51 |
|                               |                 |        | 1995   | 1,805 | 1,577 | 2,174  | 75     | 72.72  | 63.52  | 87.57  | 47 |
|                               |                 |        | 1996   | 1,914 | 1,610 | 2,228  | 75     | 75.95  | 63.88  | 88.38  | 45 |
|                               |                 |        | 1997   | 2,033 | 1,645 | 2,288  | 69     | 79.26  | 64.11  | 89.20  | 45 |
|                               |                 |        | 1998   | 2,168 | 1,682 | 2,451  | 65     | 82.96  | 64.36  | 93.81  | 40 |
|                               |                 |        | 1999   | 2,504 | 2,303 | 2,776  | 60     | 94.12  | 86.59  | 104.37 | 29 |
|                               |                 |        | 2000   | 2,452 | 1,686 | 3,237  | 60     | 91.29  | 62.76  | 120.51 | 28 |
|                               |                 |        | 2001   | 2,917 | 2,507 | 3,717  | 56     | 107.82 | 92.67  | 137.40 | 19 |
|                               | 2002            |        | 2,758  | 1,645 | 4,242 | 52     | 101.10 | 60.29  | 155.49 | 20     |    |
|                               | 2003            |        | 2,891  | 1,605 | 4,748 | 51     | 105.62 | 58.62  | 173.45 | 18     |    |
|                               | 2004            | 3,017  | 1,544  | 5,258 | 48    | 110.23 | 56.41  | 192.13 | 18     |        |    |
|                               | 2005            | 3,156  | 1,495  | 5,796 | 46    | 114.54 | 54.26  | 210.38 | 15     |        |    |
|                               | 2006            | 3,314  | 1,448  | 6,386 | 45    | 118.65 | 51.85  | 228.62 | 14     |        |    |
|                               | 2007            | 3,475  | 1,409  | 6,985 | 42    | 122.74 | 49.76  | 246.71 | 12     |        |    |



| Metropolitan Statistical Area | PWID Population | Year  | Number      | Min   | Max    | Rank  | Rate   | Min    | Max    | Rank  |        |    |
|-------------------------------|-----------------|-------|-------------|-------|--------|-------|--------|--------|--------|-------|--------|----|
| Tulsa, OK                     | Young (15-29)   | 1992  | 1,590       | 1,046 | 2,095  | 69    | 103.12 | 67.83  | 135.88 | 38    |        |    |
|                               |                 | 1993  | 1,613       | 1,202 | 2,082  | 61    | 104.79 | 78.14  | 135.28 | 37    |        |    |
|                               |                 | 1994  | 1,710       | 1,367 | 2,064  | 64    | 111.65 | 89.24  | 134.77 | 31    |        |    |
|                               |                 | 1995  | 1,705       | 1,490 | 2,054  | 57    | 110.83 | 96.81  | 133.46 | 31    |        |    |
|                               |                 | 1996  | 1,777       | 1,495 | 2,068  | 60    | 113.61 | 95.55  | 132.21 | 34    |        |    |
|                               |                 | 1997  | 1,857       | 1,502 | 2,090  | 58    | 116.24 | 94.02  | 130.82 | 34    |        |    |
|                               |                 | 1998  | 1,949       | 1,512 | 2,204  | 57    | 119.39 | 92.63  | 135.01 | 31    |        |    |
|                               |                 | 1999  | 2,216       | 2,038 | 2,457  | 54    | 133.50 | 122.81 | 148.03 | 27    |        |    |
|                               |                 | 2000  | 2,135       | 1,468 | 2,819  | 56    | 128.43 | 88.30  | 169.54 | 25    |        |    |
|                               |                 | 2001  | 2,498       | 2,147 | 3,183  | 49    | 149.81 | 128.76 | 190.91 | 19    |        |    |
|                               |                 | 2002  | 2,319       | 1,383 | 3,567  | 53    | 138.25 | 82.45  | 212.63 | 25    |        |    |
|                               |                 | 2003  | 2,384       | 1,323 | 3,914  | 56    | 142.14 | 78.89  | 233.43 | 24    |        |    |
|                               |                 | 2004  | 2,432       | 1,245 | 4,240  | 58    | 145.25 | 74.33  | 253.18 | 23    |        |    |
|                               |                 | 2005  | 2,482       | 1,176 | 4,558  | 60    | 147.33 | 69.78  | 270.60 | 25    |        |    |
|                               |                 | 2006  | 2,533       | 1,107 | 4,881  | 59    | 148.08 | 64.71  | 285.33 | 23    |        |    |
|                               |                 | 2007  | 2,571       | 1,042 | 5,167  | 57    | 146.85 | 59.54  | 295.18 | 23    |        |    |
|                               |                 |       | Old (30-64) | 1992  | 2,677  | 1,761 | 3,528  | 85     | 82.30  | 54.14 | 108.45 | 79 |
|                               |                 |       |             | 1993  | 2,691  | 2,007 | 3,474  | 83     | 81.36  | 60.67 | 105.03 | 75 |
|                               |                 |       |             | 1994  | 2,832  | 2,264 | 3,419  | 85     | 84.71  | 67.71 | 102.24 | 77 |
|                               |                 |       |             | 1995  | 2,807  | 2,452 | 3,380  | 83     | 83.38  | 72.83 | 100.40 | 69 |
| 1996                          | 2,911           |       |             | 2,448 | 3,387  | 83    | 85.13  | 71.60  | 99.07  | 69    |        |    |
| 1997                          | 3,030           |       |             | 2,450 | 3,409  | 83    | 87.18  | 70.52  | 98.11  | 60    |        |    |
| 1998                          | 3,168           |       |             | 2,458 | 3,583  | 80    | 89.58  | 69.50  | 101.30 | 59    |        |    |
| 1999                          | 3,593           |       |             | 3,305 | 3,984  | 76    | 99.68  | 91.71  | 110.54 | 54    |        |    |
| 2000                          | 3,455           |       |             | 2,375 | 4,561  | 79    | 94.58  | 65.03  | 124.86 | 55    |        |    |
| 2001                          | 4,034           |       |             | 3,467 | 5,140  | 74    | 109.05 | 93.73  | 138.97 | 45    |        |    |
| 2002                          | 3,740           |       |             | 2,230 | 5,752  | 74    | 99.89  | 59.57  | 153.63 | 46    |        |    |
| 2003                          | 3,837           |       |             | 2,130 | 6,302  | 69    | 102.04 | 56.64  | 167.58 | 43    |        |    |
| 2004                          | 3,910           |       |             | 2,001 | 6,815  | 66    | 103.71 | 53.08  | 180.78 | 39    |        |    |
| 2005                          | 3,981           |       |             | 1,886 | 7,313  | 64    | 104.85 | 49.67  | 192.59 | 33    |        |    |
| 2006                          | 4,050           | 1,770 | 7,803       | 63    | 105.40 | 46.06 | 203.10 | 31     |        |       |        |    |
| 2007                          | 4,085           | 1,656 | 8,212       | 59    | 105.15 | 42.63 | 211.35 | 27     |        |       |        |    |

| Metropolitan Statistical Area | PWID Population | Year | Number             | Min   | Max   | Rank  | Rate   | Min   | Max    | Rank  |        |    |
|-------------------------------|-----------------|------|--------------------|-------|-------|-------|--------|-------|--------|-------|--------|----|
| Ventura, CA                   | Total           | 1992 | 4,540              | 2,261 | 5,800 | 80    | 100.40 | 50.00 | 128.26 | 54    |        |    |
|                               |                 | 1993 | 5,536              | 2,166 | 8,887 | 71    | 122.31 | 47.86 | 196.36 | 41    |        |    |
|                               |                 | 1994 | 4,334              | 2,103 | 5,841 | 82    | 95.04  | 46.11 | 128.09 | 54    |        |    |
|                               |                 | 1995 | 5,331              | 2,028 | 8,634 | 72    | 116.63 | 44.36 | 188.89 | 41    |        |    |
|                               |                 | 1996 | 5,243              | 1,978 | 8,506 | 73    | 113.98 | 43.00 | 184.90 | 44    |        |    |
|                               |                 | 1997 | 5,224              | 1,954 | 8,477 | 73    | 111.33 | 41.63 | 180.66 | 45    |        |    |
|                               |                 | 1998 | 5,209              | 1,952 | 8,436 | 75    | 108.94 | 40.82 | 176.42 | 46    |        |    |
|                               |                 | 1999 | 4,142              | 1,955 | 6,315 | 85    | 84.75  | 40.01 | 129.20 | 60    |        |    |
|                               |                 | 2000 | 5,187              | 2,059 | 8,291 | 76    | 103.94 | 41.25 | 166.14 | 45    |        |    |
|                               |                 | 2001 | 4,140              | 2,152 | 6,393 | 85    | 81.73  | 42.49 | 126.22 | 59    |        |    |
|                               |                 | 2002 | 5,026              | 2,273 | 7,688 | 78    | 97.32  | 44.01 | 148.85 | 47    |        |    |
|                               |                 | 2003 | 4,916              | 2,381 | 7,331 | 80    | 94.02  | 45.53 | 140.21 | 50    |        |    |
|                               |                 | 2004 | 4,793              | 2,483 | 6,959 | 80    | 90.85  | 47.07 | 131.90 | 53    |        |    |
|                               |                 | 2005 | 4,633              | 2,571 | 6,514 | 82    | 87.62  | 48.61 | 123.18 | 56    |        |    |
|                               |                 | 2006 | 4,489              | 2,663 | 6,098 | 85    | 84.25  | 49.98 | 114.45 | 56    |        |    |
|                               |                 | 2007 | 4,316              | 2,743 | 5,934 | 85    | 80.81  | 51.35 | 111.09 | 60    |        |    |
|                               |                 |      | Non-Hispanic White | 1992  | 1,984 | 988   | 2,534  | 85    | 67.91  | 33.82 | 86.76  | 56 |
|                               |                 |      |                    | 1993  | 2,152 | 842   | 3,454  | 75    | 74.84  | 29.28 | 120.15 | 52 |
|                               |                 |      |                    | 1994  | 1,567 | 760   | 2,112  | 92    | 54.96  | 26.66 | 74.07  | 65 |
|                               |                 |      |                    | 1995  | 1,870 | 711   | 3,029  | 83    | 66.38  | 25.25 | 107.51 | 55 |
| 1996                          | 1,849           |      |                    | 697   | 2,999 | 84    | 66.08  | 24.93 | 107.20 | 55    |        |    |
| 1997                          | 1,901           |      |                    | 711   | 3,084 | 84    | 67.33  | 25.18 | 109.26 | 55    |        |    |
| 1998                          | 1,988           |      |                    | 745   | 3,219 | 83    | 69.85  | 26.17 | 113.12 | 56    |        |    |
| 1999                          | 1,669           |      |                    | 788   | 2,544 | 87    | 57.98  | 27.37 | 88.38  | 64    |        |    |
| 2000                          | 2,204           |      |                    | 875   | 3,522 | 80    | 75.87  | 30.11 | 121.28 | 53    |        |    |
| 2001                          | 1,838           |      |                    | 956   | 2,839 | 87    | 63.05  | 32.78 | 97.37  | 61    |        |    |
| 2002                          | 2,298           |      |                    | 1,039 | 3,515 | 81    | 78.09  | 35.32 | 119.44 | 47    |        |    |
| 2003                          | 2,268           |      |                    | 1,098 | 3,382 | 81    | 76.93  | 37.26 | 114.73 | 49    |        |    |
| 2004                          | 2,173           |      |                    | 1,126 | 3,155 | 82    | 73.83  | 38.25 | 107.19 | 51    |        |    |
| 2005                          | 1,996           |      |                    | 1,108 | 2,806 | 86    | 68.34  | 37.92 | 96.08  | 56    |        |    |
| 2006                          | 1,758           |      |                    | 1,043 | 2,388 | 93    | 60.48  | 35.88 | 82.16  | 66    |        |    |
| 2007                          | 1,448           | 920  | 1,991              | 96    | 50.30 | 31.97 | 69.15  | 78    |        |       |        |    |

| Metropolitan Statistical Area | PWID Population    | Year     | Number | Min   | Max    | Rank   | Rate   | Min    | Max    | Rank   |    |
|-------------------------------|--------------------|----------|--------|-------|--------|--------|--------|--------|--------|--------|----|
| Ventura, CA                   | Non-Hispanic Black | 1992     | 164    | 82    | 210    | 100    | 162.48 | 80.92  | 207.56 | 84     |    |
|                               |                    | 1993     | 178    | 69    | 285    | 100    | 176.86 | 69.20  | 283.94 | 77     |    |
|                               |                    | 1994     | 125    | 61    | 168    | 100    | 123.16 | 59.75  | 165.99 | 93     |    |
|                               |                    | 1995     | 140    | 53    | 226    | 100    | 138.74 | 52.77  | 224.71 | 83     |    |
|                               |                    | 1996     | 127    | 48    | 206    | 100    | 125.81 | 47.46  | 204.09 | 84     |    |
|                               |                    | 1997     | 118    | 44    | 192    | 100    | 116.85 | 43.70  | 189.62 | 83     |    |
|                               |                    | 1998     | 112    | 42    | 182    | 100    | 110.85 | 41.54  | 179.51 | 83     |    |
|                               |                    | 1999     | 86     | 41    | 131    | 100    | 84.21  | 39.75  | 128.37 | 92     |    |
|                               |                    | 2000     | 106    | 42    | 170    | 99     | 102.28 | 40.59  | 163.49 | 83     |    |
|                               |                    | 2001     | 85     | 44    | 131    | 99     | 81.58  | 42.42  | 125.99 | 89     |    |
|                               |                    | 2002     | 106    | 48    | 162    | 99     | 98.28  | 44.44  | 150.31 | 79     |    |
|                               |                    | 2003     | 108    | 52    | 161    | 99     | 99.94  | 48.40  | 149.05 | 73     |    |
|                               |                    | 2004     | 112    | 58    | 162    | 99     | 102.71 | 53.22  | 149.12 | 72     |    |
|                               |                    | 2005     | 118    | 65    | 166    | 99     | 107.14 | 59.45  | 150.63 | 68     |    |
|                               |                    | 2006     | 128    | 76    | 173    | 99     | 113.82 | 67.52  | 154.61 | 65     |    |
|                               | 2007               | 141      | 90     | 194   | 99     | 129.11 | 82.06  | 177.50 | 59     |        |    |
|                               |                    | Hispanic | 1992   | 2,140 | 1,066  | 2,734  | 32     | 174.52 | 86.92  | 222.95 | 37 |
|                               |                    |          | 1993   | 2,746 | 1,075  | 4,409  | 29     | 216.60 | 84.75  | 347.74 | 29 |
|                               |                    |          | 1994   | 2,220 | 1,077  | 2,992  | 31     | 168.75 | 81.87  | 227.44 | 31 |
|                               |                    |          | 1995   | 2,777 | 1,056  | 4,497  | 29     | 205.16 | 78.03  | 332.28 | 27 |
|                               |                    |          | 1996   | 2,744 | 1,035  | 4,451  | 29     | 196.68 | 74.19  | 319.06 | 26 |
| 1997                          |                    |          | 2,722  | 1,018 | 4,417  | 27     | 187.46 | 70.10  | 304.18 | 22     |    |
| 1998                          |                    |          | 2,684  | 1,006 | 4,347  | 26     | 177.79 | 66.62  | 287.93 | 21     |    |
| 1999                          |                    |          | 2,102  | 992   | 3,204  | 33     | 133.79 | 63.16  | 203.96 | 32     |    |
| 2000                          |                    |          | 2,586  | 1,026 | 4,134  | 26     | 158.10 | 62.75  | 252.72 | 23     |    |
| 2001                          |                    |          | 2,029  | 1,055 | 3,133  | 36     | 120.39 | 62.59  | 185.92 | 33     |    |
| 2002                          |                    |          | 2,429  | 1,098 | 3,715  | 28     | 139.55 | 63.11  | 213.44 | 24     |    |
| 2003                          |                    |          | 2,356  | 1,141 | 3,514  | 29     | 131.80 | 63.82  | 196.55 | 26     |    |
| 2004                          |                    |          | 2,299  | 1,191 | 3,338  | 31     | 125.78 | 65.17  | 182.62 | 28     |    |
| 2005                          |                    |          | 2,250  | 1,248 | 3,163  | 31     | 121.25 | 67.28  | 170.46 | 28     |    |
| 2006                          |                    |          | 2,238  | 1,327 | 3,040  | 32     | 118.15 | 70.10  | 160.50 | 28     |    |
| 2007                          | 2,243              | 1,425    | 3,083  | 32    | 116.13 | 73.80  | 159.65 | 27     |        |        |    |

| Metropolitan Statistical Area | PWID Population | Year   | Number | Min   | Max   | Rank   | Rate   | Min    | Max    | Rank   |    |
|-------------------------------|-----------------|--------|--------|-------|-------|--------|--------|--------|--------|--------|----|
| Ventura, CA                   | Male            | 1992   | 2,698  | 1,343 | 3,446 | 81     | 116.30 | 57.92  | 148.57 | 64     |    |
|                               |                 | 1993   | 3,270  | 1,279 | 5,249 | 78     | 140.99 | 55.17  | 226.35 | 46     |    |
|                               |                 | 1994   | 2,559  | 1,241 | 3,449 | 84     | 109.67 | 53.21  | 147.81 | 68     |    |
|                               |                 | 1995   | 3,161  | 1,202 | 5,120 | 81     | 135.43 | 51.51  | 219.34 | 45     |    |
|                               |                 | 1996   | 3,135  | 1,183 | 5,086 | 81     | 133.71 | 50.44  | 216.90 | 46     |    |
|                               |                 | 1997   | 3,160  | 1,182 | 5,128 | 79     | 132.38 | 49.50  | 214.82 | 46     |    |
|                               |                 | 1998   | 3,194  | 1,197 | 5,173 | 77     | 131.62 | 49.32  | 213.15 | 46     |    |
|                               |                 | 1999   | 2,578  | 1,217 | 3,930 | 85     | 104.07 | 49.12  | 158.64 | 63     |    |
|                               |                 | 2000   | 3,279  | 1,301 | 5,242 | 74     | 129.64 | 51.45  | 207.22 | 45     |    |
|                               |                 | 2001   | 2,658  | 1,382 | 4,104 | 84     | 103.64 | 53.89  | 160.06 | 62     |    |
|                               |                 | 2002   | 3,274  | 1,481 | 5,007 | 76     | 124.91 | 56.49  | 191.06 | 44     |    |
|                               |                 | 2003   | 3,244  | 1,571 | 4,837 | 76     | 122.39 | 59.27  | 182.52 | 45     |    |
|                               |                 | 2004   | 3,198  | 1,657 | 4,643 | 77     | 119.51 | 61.93  | 173.53 | 47     |    |
|                               |                 | 2005   | 3,118  | 1,730 | 4,384 | 81     | 116.04 | 64.39  | 163.14 | 49     |    |
|                               | 2006            | 3,038  | 1,802  | 4,127 | 82    | 111.96 | 66.42  | 152.09 | 53     |        |    |
|                               | 2007            | 2,927  | 1,860  | 4,025 | 81    | 107.86 | 68.55  | 148.29 | 54     |        |    |
|                               |                 | Female | 1992   | 1,824 | 908   | 2,330  | 71     | 82.82  | 41.25  | 105.80 | 41 |
|                               |                 |        | 1993   | 2,261 | 885   | 3,630  | 63     | 102.47 | 40.09  | 164.50 | 28 |
|                               |                 |        | 1994   | 1,785 | 866   | 2,406  | 74     | 80.15  | 38.88  | 108.02 | 42 |
|                               |                 |        | 1995   | 2,197 | 836   | 3,558  | 65     | 98.22  | 37.36  | 159.08 | 27 |
|                               |                 |        | 1996   | 2,148 | 810   | 3,485  | 65     | 95.25  | 35.93  | 154.52 | 29 |
|                               |                 |        | 1997   | 2,116 | 791   | 3,434  | 67     | 91.78  | 34.32  | 148.93 | 28 |
|                               |                 |        | 1998   | 2,076 | 778   | 3,362  | 69     | 88.15  | 33.03  | 142.76 | 34 |
|                               |                 |        | 1999   | 1,618 | 764   | 2,466  | 84     | 67.12  | 31.68  | 102.32 | 57 |
|                               |                 |        | 2000   | 1,979 | 785   | 3,163  | 74     | 80.40  | 31.91  | 128.52 | 41 |
|                               |                 |        | 2001   | 1,539 | 800   | 2,377  | 85     | 61.53  | 31.99  | 95.03  | 60 |
|                               | 2002            |        | 1,818  | 822   | 2,781 | 78     | 71.48  | 32.33  | 109.33 | 47     |    |
|                               | 2003            |        | 1,730  | 838   | 2,580 | 81     | 67.10  | 32.49  | 100.06 | 51     |    |
|                               | 2004            | 1,641  | 851    | 2,383 | 83    | 63.13  | 32.71  | 91.67  | 56     |        |    |
|                               | 2005            | 1,547  | 858    | 2,175 | 85    | 59.48  | 33.00  | 83.62  | 61     |        |    |
|                               | 2006            | 1,466  | 869    | 1,991 | 86    | 56.05  | 33.26  | 76.15  | 63     |        |    |
|                               | 2007            | 1,384  | 879    | 1,902 | 88    | 52.66  | 33.47  | 72.40  | 66     |        |    |

| Metropolitan Statistical Area | PWID Population | Year        | Number | Min   | Max   | Rank  | Rate   | Min    | Max    | Rank   |    |
|-------------------------------|-----------------|-------------|--------|-------|-------|-------|--------|--------|--------|--------|----|
| Ventura, CA                   | Young (15-29)   | 1992        | 1,326  | 660   | 1,693 | 76    | 88.65  | 44.15  | 113.25 | 52     |    |
|                               |                 | 1993        | 1,564  | 612   | 2,511 | 65    | 106.99 | 41.87  | 171.77 | 32     |    |
|                               |                 | 1994        | 1,214  | 589   | 1,636 | 77    | 84.08  | 40.79  | 113.33 | 53     |    |
|                               |                 | 1995        | 1,509  | 574   | 2,443 | 67    | 105.90 | 40.28  | 171.52 | 38     |    |
|                               |                 | 1996        | 1,521  | 574   | 2,468 | 68    | 107.17 | 40.43  | 173.85 | 36     |    |
|                               |                 | 1997        | 1,569  | 587   | 2,545 | 67    | 109.24 | 40.85  | 177.27 | 37     |    |
|                               |                 | 1998        | 1,625  | 609   | 2,632 | 67    | 111.73 | 41.86  | 180.94 | 35     |    |
|                               |                 | 1999        | 1,343  | 634   | 2,047 | 81    | 90.68  | 42.80  | 138.23 | 47     |    |
|                               |                 | 2000        | 1,738  | 690   | 2,777 | 66    | 115.02 | 45.65  | 183.85 | 34     |    |
|                               |                 | 2001        | 1,420  | 738   | 2,193 | 83    | 92.65  | 48.17  | 143.09 | 49     |    |
|                               |                 | 2002        | 1,742  | 788   | 2,664 | 72    | 110.41 | 49.93  | 168.88 | 42     |    |
|                               |                 | 2003        | 1,690  | 819   | 2,521 | 74    | 105.39 | 51.04  | 157.17 | 47     |    |
|                               |                 | 2004        | 1,600  | 829   | 2,322 | 77    | 97.90  | 50.72  | 142.14 | 53     |    |
|                               |                 | 2005        | 1,459  | 810   | 2,052 | 85    | 88.08  | 48.87  | 123.84 | 56     |    |
|                               | 2006            | 1,289       | 765    | 1,751 | 89    | 75.92 | 45.04  | 103.13 | 68     |        |    |
|                               | 2007            | 1,082       | 688    | 1,488 | 92    | 63.18 | 40.15  | 86.86  | 85     |        |    |
|                               |                 | Old (30-64) | 1992   | 3,283 | 1,635 | 4,193 | 82     | 108.46 | 54.02  | 138.56 | 55 |
|                               |                 |             | 1993   | 4,032 | 1,578 | 6,473 | 69     | 131.59 | 51.49  | 211.25 | 42 |
|                               |                 |             | 1994   | 3,162 | 1,534 | 4,262 | 82     | 101.45 | 49.22  | 136.73 | 61 |
|                               |                 |             | 1995   | 3,878 | 1,475 | 6,281 | 75     | 123.27 | 46.88  | 199.64 | 42 |
|                               |                 |             | 1996   | 3,790 | 1,430 | 6,149 | 76     | 119.16 | 44.95  | 193.30 | 43 |
|                               | 1997            |             | 3,741  | 1,399 | 6,071 | 76    | 114.88 | 42.96  | 186.42 | 43     |    |
|                               | 1998            |             | 3,688  | 1,382 | 5,972 | 76    | 110.85 | 41.54  | 179.52 | 45     |    |
|                               | 1999            |             | 2,895  | 1,367 | 4,414 | 84    | 84.99  | 40.12  | 129.56 | 62     |    |
|                               | 2000            |             | 3,579  | 1,421 | 5,721 | 78    | 102.86 | 40.82  | 164.41 | 47     |    |
|                               | 2001            |             | 2,823  | 1,468 | 4,360 | 83    | 79.92  | 41.55  | 123.43 | 62     |    |
|                               | 2002            |             | 3,397  | 1,536 | 5,196 | 78    | 94.70  | 42.83  | 144.85 | 49     |    |
|                               | 2003            |             | 3,307  | 1,601 | 4,931 | 78    | 91.23  | 44.18  | 136.05 | 48     |    |
|                               | 2004            |             | 3,227  | 1,672 | 4,685 | 78    | 88.60  | 45.91  | 128.65 | 49     |    |
|                               | 2005            |             | 3,143  | 1,744 | 4,419 | 78    | 86.56  | 48.03  | 121.70 | 48     |    |
|                               | 2006            | 3,092       | 1,835  | 4,201 | 77    | 85.18 | 50.54  | 115.72 | 47     |        |    |
|                               | 2007            | 3,041       | 1,933  | 4,181 | 74    | 83.82 | 53.27  | 115.24 | 44     |        |    |

| Metropolitan Statistical Area | PWID Population | Year  | Number             | Min    | Max    | Rank  | Rate   | Min   | Max    | Rank  |        |    |
|-------------------------------|-----------------|-------|--------------------|--------|--------|-------|--------|-------|--------|-------|--------|----|
| Washington, DC--MD--VA--WV    | Total           | 1992  | 27,585             | 7,075  | 39,577 | 9     | 89.80  | 23.03 | 128.84 | 61    |        |    |
|                               |                 | 1993  | 24,989             | 7,095  | 38,651 | 13    | 80.52  | 22.86 | 124.54 | 66    |        |    |
|                               |                 | 1994  | 28,306             | 7,125  | 40,050 | 8     | 90.18  | 22.70 | 127.60 | 63    |        |    |
|                               |                 | 1995  | 26,170             | 7,142  | 42,000 | 11    | 82.59  | 22.54 | 132.55 | 64    |        |    |
|                               |                 | 1996  | 26,843             | 7,184  | 44,184 | 10    | 83.51  | 22.35 | 137.46 | 63    |        |    |
|                               |                 | 1997  | 27,481             | 7,220  | 46,374 | 9     | 84.36  | 22.16 | 142.36 | 60    |        |    |
|                               |                 | 1998  | 28,232             | 7,367  | 48,778 | 9     | 85.39  | 22.28 | 147.54 | 58    |        |    |
|                               |                 | 1999  | 31,016             | 7,555  | 51,495 | 8     | 91.98  | 22.40 | 152.71 | 56    |        |    |
|                               |                 | 2000  | 30,281             | 7,910  | 54,860 | 8     | 87.88  | 22.96 | 159.22 | 57    |        |    |
|                               |                 | 2001  | 33,272             | 8,286  | 58,414 | 8     | 94.40  | 23.51 | 165.73 | 54    |        |    |
|                               |                 | 2002  | 31,979             | 9,755  | 61,959 | 8     | 89.14  | 27.19 | 172.71 | 54    |        |    |
|                               |                 | 2003  | 32,858             | 11,239 | 65,413 | 8     | 90.26  | 30.87 | 179.68 | 52    |        |    |
|                               |                 | 2004  | 33,904             | 13,316 | 69,103 | 7     | 91.75  | 36.04 | 187.00 | 51    |        |    |
|                               |                 | 2005  | 34,980             | 15,460 | 72,918 | 7     | 93.21  | 41.20 | 194.31 | 49    |        |    |
|                               |                 | 2006  | 35,940             | 17,717 | 76,517 | 7     | 94.95  | 46.81 | 202.15 | 48    |        |    |
|                               |                 | 2007  | 36,886             | 18,395 | 80,157 | 7     | 96.63  | 48.19 | 209.99 | 44    |        |    |
|                               |                 |       | Non-Hispanic White | 1992   | 14,015 | 3,595 | 20,107 | 11    | 72.39  | 18.57 | 103.86 | 51 |
|                               |                 |       |                    | 1993   | 11,474 | 3,258 | 17,747 | 17    | 59.40  | 16.87 | 91.88  | 60 |
|                               |                 |       |                    | 1994   | 11,894 | 2,994 | 16,829 | 13    | 61.57  | 15.50 | 87.12  | 60 |
|                               |                 |       |                    | 1995   | 10,219 | 2,789 | 16,400 | 18    | 53.03  | 14.47 | 85.10  | 65 |
| 1996                          | 9,909           |       |                    | 2,652  | 16,310 | 17    | 51.34  | 13.74 | 84.51  | 66    |        |    |
| 1997                          | 9,764           |       |                    | 2,565  | 16,477 | 18    | 50.58  | 13.29 | 85.35  | 68    |        |    |
| 1998                          | 9,834           |       |                    | 2,566  | 16,990 | 18    | 50.85  | 13.27 | 87.85  | 69    |        |    |
| 1999                          | 10,781          |       |                    | 2,626  | 17,899 | 18    | 55.33  | 13.48 | 91.86  | 68    |        |    |
| 2000                          | 10,681          |       |                    | 2,790  | 19,351 | 17    | 54.25  | 14.17 | 98.28  | 68    |        |    |
| 2001                          | 12,094          |       |                    | 3,012  | 21,232 | 17    | 60.49  | 15.06 | 106.19 | 63    |        |    |
| 2002                          | 12,138          |       |                    | 3,703  | 23,517 | 13    | 60.20  | 18.36 | 116.64 | 64    |        |    |
| 2003                          | 13,167          |       |                    | 4,504  | 26,213 | 11    | 64.95  | 22.21 | 129.29 | 60    |        |    |
| 2004                          | 14,463          |       |                    | 5,681  | 29,479 | 9     | 70.91  | 27.85 | 144.54 | 55    |        |    |
| 2005                          | 15,975          |       |                    | 7,060  | 33,301 | 7     | 77.86  | 34.41 | 162.31 | 47    |        |    |
| 2006                          | 17,620          |       |                    | 8,686  | 37,513 | 6     | 86.09  | 42.44 | 183.30 | 44    |        |    |
| 2007                          | 19,418          | 9,684 | 42,198             | 6      | 94.92  | 47.34 | 206.28 | 41    |        |       |        |    |

| Metropolitan Statistical Area | PWID Population    | Year | Number   | Min   | Max    | Rank  | Rate   | Min   | Max    | Rank |       |    |
|-------------------------------|--------------------|------|----------|-------|--------|-------|--------|-------|--------|------|-------|----|
| Washington, DC--MD--VA--WV    | Non-Hispanic Black | 1992 | 9,761    | 2,504 | 14,004 | 9     | 126.91 | 32.55 | 182.08 | 94   |       |    |
|                               |                    | 1993 | 10,565   | 3,000 | 16,341 | 8     | 135.21 | 38.39 | 209.13 | 88   |       |    |
|                               |                    | 1994 | 13,594   | 3,422 | 19,235 | 7     | 171.16 | 43.08 | 242.17 | 79   |       |    |
|                               |                    | 1995 | 13,731   | 3,747 | 22,037 | 7     | 170.34 | 46.48 | 273.37 | 72   |       |    |
|                               |                    | 1996 | 14,928   | 3,995 | 24,572 | 7     | 181.56 | 48.59 | 298.85 | 66   |       |    |
|                               |                    | 1997 | 15,810   | 4,154 | 26,680 | 6     | 188.96 | 49.64 | 318.88 | 54   |       |    |
|                               |                    | 1998 | 16,466   | 4,297 | 28,448 | 5     | 192.86 | 50.33 | 333.21 | 51   |       |    |
|                               |                    | 1999 | 18,007   | 4,386 | 29,897 | 4     | 206.27 | 50.25 | 342.47 | 47   |       |    |
|                               |                    | 2000 | 17,200   | 4,493 | 31,162 | 3     | 192.95 | 50.40 | 349.56 | 43   |       |    |
|                               |                    | 2001 | 18,170   | 4,525 | 31,900 | 3     | 200.02 | 49.81 | 351.17 | 40   |       |    |
|                               |                    | 2002 | 16,483   | 5,028 | 31,937 | 3     | 178.17 | 54.35 | 345.21 | 42   |       |    |
|                               |                    | 2003 | 15,674   | 5,361 | 31,203 | 3     | 167.05 | 57.14 | 332.56 | 46   |       |    |
|                               |                    | 2004 | 14,656   | 5,756 | 29,871 | 3     | 153.73 | 60.38 | 313.34 | 49   |       |    |
|                               |                    | 2005 | 13,409   | 5,927 | 27,953 | 4     | 138.39 | 61.17 | 288.49 | 55   |       |    |
|                               |                    | 2006 | 11,964   | 5,898 | 25,472 | 8     | 121.92 | 60.10 | 259.57 | 62   |       |    |
|                               |                    | 2007 | 10,469   | 5,221 | 22,751 | 8     | 105.80 | 52.76 | 229.91 | 69   |       |    |
|                               |                    |      | Hispanic | 1992  | 440    | 113   | 631    | 57    | 23.46  | 6.02 | 33.66 | 97 |
|                               |                    |      |          | 1993  | 353    | 100   | 546    | 59    | 17.64  | 5.01 | 27.29 | 99 |
|                               |                    |      |          | 1994  | 374    | 94    | 529    | 56    | 17.61  | 4.43 | 24.92 | 99 |
|                               |                    |      |          | 1995  | 339    | 92    | 543    | 58    | 15.07  | 4.11 | 24.19 | 99 |
| 1996                          | 354                |      |          | 95    | 583    | 58    | 14.78  | 3.96  | 24.33  | 99   |       |    |
| 1997                          | 382                |      |          | 100   | 644    | 57    | 14.95  | 3.93  | 25.23  | 97   |       |    |
| 1998                          | 424                |      |          | 111   | 733    | 57    | 15.56  | 4.06  | 26.88  | 95   |       |    |
| 1999                          | 514                |      |          | 125   | 854    | 54    | 17.72  | 4.32  | 29.42  | 93   |       |    |
| 2000                          | 561                |      |          | 146   | 1,016  | 55    | 18.11  | 4.73  | 32.82  | 92   |       |    |
| 2001                          | 692                |      |          | 172   | 1,215  | 53    | 21.08  | 5.25  | 37.00  | 91   |       |    |
| 2002                          | 748                |      |          | 228   | 1,449  | 52    | 21.59  | 6.58  | 41.82  | 89   |       |    |
| 2003                          | 858                |      |          | 294   | 1,708  | 51    | 23.54  | 8.05  | 46.86  | 88   |       |    |
| 2004                          | 977                |      |          | 384   | 1,991  | 51    | 25.59  | 10.05 | 52.17  | 86   |       |    |
| 2005                          | 1,093              |      |          | 483   | 2,278  | 49    | 27.32  | 12.08 | 56.96  | 82   |       |    |
| 2006                          | 1,190              | 587  | 2,533    | 46    | 28.58  | 14.09 | 60.84  | 82    |        |      |       |    |
| 2007                          | 1,258              | 628  | 2,734    | 46    | 29.16  | 14.54 | 63.38  | 81    |        |      |       |    |

| Metropolitan Statistical Area | PWID Population | Year   | Number | Min    | Max    | Rank   | Rate   | Min    | Max    | Rank   |    |
|-------------------------------|-----------------|--------|--------|--------|--------|--------|--------|--------|--------|--------|----|
| Washington, DC--MD--VA--WV    | Male            | 1992   | 16,500 | 4,232  | 23,673 | 12     | 109.00 | 27.96  | 156.38 | 71     |    |
|                               |                 | 1993   | 15,549 | 4,415  | 24,051 | 15     | 101.74 | 28.88  | 157.36 | 67     |    |
|                               |                 | 1994   | 18,114 | 4,559  | 25,629 | 9      | 117.24 | 29.51  | 165.88 | 60     |    |
|                               |                 | 1995   | 17,064 | 4,657  | 27,386 | 11     | 109.52 | 29.89  | 175.77 | 61     |    |
|                               |                 | 1996   | 17,702 | 4,738  | 29,137 | 9      | 112.07 | 30.00  | 184.47 | 58     |    |
|                               |                 | 1997   | 18,216 | 4,786  | 30,739 | 9      | 113.93 | 29.93  | 192.26 | 54     |    |
|                               |                 | 1998   | 18,716 | 4,884  | 32,336 | 9      | 115.48 | 30.14  | 199.52 | 53     |    |
|                               |                 | 1999   | 20,478 | 4,988  | 33,999 | 8      | 123.99 | 30.20  | 205.86 | 51     |    |
|                               |                 | 2000   | 19,846 | 5,184  | 35,955 | 9      | 117.55 | 30.71  | 212.97 | 54     |    |
|                               |                 | 2001   | 21,592 | 5,377  | 37,908 | 8      | 125.12 | 31.16  | 219.66 | 51     |    |
|                               |                 | 2002   | 20,513 | 6,257  | 39,745 | 9      | 116.91 | 35.66  | 226.52 | 52     |    |
|                               |                 | 2003   | 20,818 | 7,121  | 41,443 | 8      | 116.97 | 40.01  | 232.87 | 49     |    |
|                               |                 | 2004   | 21,218 | 8,334  | 43,246 | 8      | 117.49 | 46.15  | 239.47 | 48     |    |
|                               |                 | 2005   | 21,650 | 9,568  | 45,130 | 7      | 117.86 | 52.09  | 245.69 | 47     |    |
|                               | 2006            | 22,048 | 10,869 | 46,941 | 7      | 118.88 | 58.60  | 253.10 | 48     |        |    |
|                               | 2007            | 22,506 | 11,224 | 48,908 | 7      | 120.22 | 59.95  | 261.25 | 45     |        |    |
|                               |                 | Female | 1992   | 10,880 | 2,791  | 15,610 | 8      | 69.83  | 17.91  | 100.19 | 52 |
|                               |                 |        | 1993   | 9,366  | 2,659  | 14,487 | 13     | 59.46  | 16.88  | 91.97  | 61 |
|                               |                 |        | 1994   | 10,213 | 2,571  | 14,450 | 11     | 64.08  | 16.13  | 90.67  | 60 |
|                               |                 |        | 1995   | 9,201  | 2,511  | 14,766 | 14     | 57.13  | 15.59  | 91.69  | 62 |
|                               |                 |        | 1996   | 9,298  | 2,489  | 15,305 | 15     | 56.88  | 15.22  | 93.62  | 62 |
|                               |                 |        | 1997   | 9,471  | 2,488  | 15,982 | 12     | 57.10  | 15.00  | 96.36  | 62 |
|                               |                 |        | 1998   | 9,758  | 2,547  | 16,860 | 11     | 57.90  | 15.11  | 100.03 | 60 |
|                               |                 |        | 1999   | 10,821 | 2,636  | 17,965 | 9      | 62.89  | 15.32  | 104.42 | 58 |
|                               |                 |        | 2000   | 10,712 | 2,798  | 19,407 | 8      | 60.96  | 15.92  | 110.44 | 59 |
|                               |                 |        | 2001   | 11,969 | 2,981  | 21,014 | 9      | 66.54  | 16.57  | 116.82 | 55 |
|                               | 2002            |        | 11,712 | 3,573  | 22,692 | 8      | 63.90  | 19.49  | 123.81 | 57     |    |
|                               | 2003            |        | 12,246 | 4,189  | 24,380 | 8      | 65.81  | 22.51  | 131.02 | 54     |    |
|                               | 2004            | 12,833 | 5,040  | 26,156 | 7      | 67.92  | 26.68  | 138.43 | 51     |        |    |
|                               | 2005            | 13,399 | 5,922  | 27,930 | 6      | 69.94  | 30.91  | 145.79 | 45     |        |    |
|                               | 2006            | 13,862 | 6,834  | 29,513 | 6      | 71.80  | 35.40  | 152.88 | 42     |        |    |
|                               | 2007            | 14,234 | 7,099  | 30,932 | 6      | 73.18  | 36.50  | 159.03 | 39     |        |    |



| Metropolitan Statistical Area | PWID Population | Year   | Number      | Min    | Max    | Rank  | Rate   | Min   | Max    | Rank  |        |    |
|-------------------------------|-----------------|--------|-------------|--------|--------|-------|--------|-------|--------|-------|--------|----|
| Washington, DC--MD--VA--WV    | Young (15-29)   | 1992   | 6,510       | 1,670  | 9,341  | 16    | 64.10  | 16.44 | 91.97  | 69    |        |    |
|                               |                 | 1993   | 5,066       | 1,438  | 7,836  | 20    | 50.68  | 14.39 | 78.38  | 74    |        |    |
|                               |                 | 1994   | 5,178       | 1,303  | 7,326  | 20    | 52.54  | 13.22 | 74.34  | 73    |        |    |
|                               |                 | 1995   | 4,528       | 1,236  | 7,267  | 22    | 46.50  | 12.69 | 74.62  | 79    |        |    |
|                               |                 | 1996   | 4,586       | 1,227  | 7,549  | 22    | 47.22  | 12.64 | 77.72  | 77    |        |    |
|                               |                 | 1997   | 4,811       | 1,264  | 8,119  | 19    | 49.50  | 13.01 | 83.54  | 74    |        |    |
|                               |                 | 1998   | 5,222       | 1,363  | 9,022  | 18    | 53.34  | 13.92 | 92.16  | 72    |        |    |
|                               |                 | 1999   | 6,203       | 1,511  | 10,299 | 14    | 62.73  | 15.28 | 104.15 | 66    |        |    |
|                               |                 | 2000   | 6,654       | 1,738  | 12,056 | 11    | 66.45  | 17.36 | 120.38 | 68    |        |    |
|                               |                 | 2001   | 8,106       | 2,019  | 14,231 | 9     | 79.82  | 19.88 | 140.14 | 64    |        |    |
|                               |                 | 2002   | 8,654       | 2,640  | 16,767 | 8     | 84.54  | 25.79 | 163.80 | 58    |        |    |
|                               |                 | 2003   | 9,836       | 3,364  | 19,581 | 8     | 95.04  | 32.51 | 189.21 | 51    |        |    |
|                               |                 | 2004   | 11,119      | 4,367  | 22,663 | 8     | 105.63 | 41.49 | 215.30 | 48    |        |    |
|                               |                 | 2005   | 12,393      | 5,477  | 25,833 | 7     | 115.14 | 50.89 | 240.03 | 36    |        |    |
|                               |                 | 2006   | 13,510      | 6,660  | 28,764 | 6     | 124.02 | 61.14 | 264.04 | 31    |        |    |
|                               |                 | 2007   | 14,407      | 7,185  | 31,307 | 6     | 130.69 | 65.17 | 284.00 | 29    |        |    |
|                               |                 |        | Old (30-64) | 1992   | 21,406 | 5,490 | 30,712 | 8     | 104.11 | 26.70 | 149.36 | 61 |
|                               |                 |        |             | 1993   | 20,068 | 5,697 | 31,039 | 14    | 95.38  | 27.08 | 147.53 | 62 |
|                               |                 |        |             | 1994   | 23,212 | 5,843 | 32,842 | 7     | 107.80 | 27.13 | 152.52 | 56 |
|                               |                 |        |             | 1995   | 21,702 | 5,922 | 34,829 | 12    | 98.89  | 26.98 | 158.70 | 57 |
| 1996                          | 22,340          |        |             | 5,979  | 36,771 | 9     | 99.60  | 26.66 | 163.94 | 56    |        |    |
| 1997                          | 22,802          |        |             | 5,990  | 38,478 | 9     | 99.77  | 26.21 | 168.36 | 55    |        |    |
| 1998                          | 23,210          |        |             | 6,057  | 40,101 | 9     | 99.74  | 26.03 | 172.32 | 54    |        |    |
| 1999                          | 25,107          |        |             | 6,116  | 41,685 | 8     | 105.35 | 25.66 | 174.91 | 52    |        |    |
| 2000                          | 23,979          |        |             | 6,264  | 43,443 | 7     | 98.11  | 25.63 | 177.75 | 52    |        |    |
| 2001                          | 25,598          |        |             | 6,375  | 44,941 | 8     | 102.02 | 25.41 | 179.11 | 51    |        |    |
| 2002                          | 23,731          |        |             | 7,239  | 45,979 | 8     | 92.56  | 28.23 | 179.34 | 52    |        |    |
| 2003                          | 23,349          |        |             | 7,986  | 46,481 | 8     | 89.61  | 30.65 | 178.39 | 52    |        |    |
| 2004                          | 22,905          |        |             | 8,996  | 46,685 | 8     | 86.67  | 34.04 | 176.65 | 52    |        |    |
| 2005                          | 22,323          |        |             | 9,866  | 46,533 | 8     | 83.41  | 36.86 | 173.86 | 51    |        |    |
| 2006                          | 21,548          |        |             | 10,623 | 45,878 | 8     | 79.93  | 39.41 | 170.18 | 51    |        |    |
| 2007                          | 20,709          | 10,328 | 45,003      | 8      | 76.28  | 38.04 | 165.77 | 52    |        |       |        |    |

| Metropolitan Statistical Area   | PWID Population | Year  | Number             | Min   | Max    | Rank  | Rate   | Min    | Max    | Rank   |        |    |
|---------------------------------|-----------------|-------|--------------------|-------|--------|-------|--------|--------|--------|--------|--------|----|
| West Palm Beach--Boca Raton, FL | Total           | 1992  | 9,290              | 5,175 | 12,601 | 48    | 173.03 | 96.39  | 234.69 | 23     |        |    |
|                                 |                 | 1993  | 7,267              | 1,815 | 11,603 | 57    | 131.87 | 32.94  | 210.56 | 36     |        |    |
|                                 |                 | 1994  | 8,903              | 6,036 | 10,605 | 51    | 156.72 | 106.25 | 186.69 | 26     |        |    |
|                                 |                 | 1995  | 7,086              | 2,164 | 10,024 | 57    | 121.44 | 37.09  | 171.79 | 38     |        |    |
|                                 |                 | 1996  | 7,019              | 2,322 | 9,946  | 60    | 117.35 | 38.83  | 166.28 | 41     |        |    |
|                                 |                 | 1997  | 7,000              | 2,476 | 9,937  | 60    | 113.25 | 40.05  | 160.76 | 43     |        |    |
|                                 |                 | 1998  | 7,018              | 2,629 | 9,910  | 58    | 110.18 | 41.27  | 155.58 | 43     |        |    |
|                                 |                 | 1999  | 8,393              | 6,608 | 9,848  | 51    | 128.18 | 100.91 | 150.39 | 33     |        |    |
|                                 |                 | 2000  | 6,742              | 2,850 | 9,633  | 59    | 100.51 | 42.49  | 143.61 | 48     |        |    |
|                                 |                 | 2001  | 7,550              | 5,420 | 9,400  | 55    | 109.91 | 78.90  | 136.84 | 45     |        |    |
|                                 |                 | 2002  | 5,909              | 2,702 | 9,167  | 68    | 83.58  | 38.22  | 129.66 | 60     |        |    |
|                                 |                 | 2003  | 5,363              | 2,614 | 8,876  | 74    | 74.01  | 36.08  | 122.49 | 66     |        |    |
|                                 |                 | 2004  | 4,927              | 2,541 | 8,610  | 79    | 65.92  | 34.00  | 115.19 | 71     |        |    |
|                                 |                 | 2005  | 4,610              | 2,408 | 8,246  | 84    | 60.31  | 31.50  | 107.89 | 78     |        |    |
|                                 |                 | 2006  | 4,223              | 2,232 | 7,717  | 86    | 54.90  | 29.01  | 100.32 | 89     |        |    |
|                                 |                 | 2007  | 3,822              | 2,022 | 7,120  | 88    | 49.79  | 26.34  | 92.75  | 93     |        |    |
|                                 |                 |       | Non-Hispanic White | 1992  | 5,942  | 3,310 | 8,059  | 39     | 147.71 | 82.28  | 200.34 | 21 |
|                                 |                 |       |                    | 1993  | 4,897  | 1,223 | 7,819  | 46     | 120.20 | 30.02  | 191.92 | 28 |
|                                 |                 |       |                    | 1994  | 6,173  | 4,185 | 7,353  | 36     | 148.81 | 100.89 | 177.26 | 18 |
|                                 |                 |       |                    | 1995  | 4,973  | 1,519 | 7,035  | 40     | 118.32 | 36.14  | 167.39 | 26 |
| 1996                            | 4,925           |       |                    | 1,630 | 6,979  | 41    | 115.91 | 38.35  | 164.25 | 25     |        |    |
| 1997                            | 4,868           |       |                    | 1,722 | 6,911  | 39    | 112.31 | 39.72  | 159.43 | 23     |        |    |
| 1998                            | 4,807           |       |                    | 1,801 | 6,788  | 38    | 108.95 | 40.81  | 153.83 | 25     |        |    |
| 1999                            | 5,641           |       |                    | 4,441 | 6,618  | 37    | 126.12 | 99.29  | 147.97 | 21     |        |    |
| 2000                            | 4,441           |       |                    | 1,878 | 6,346  | 43    | 98.25  | 41.54  | 140.38 | 32     |        |    |
| 2001                            | 4,886           |       |                    | 3,508 | 6,083  | 42    | 107.02 | 76.83  | 133.24 | 28     |        |    |
| 2002                            | 3,779           |       |                    | 1,728 | 5,863  | 56    | 81.52  | 37.28  | 126.47 | 44     |        |    |
| 2003                            | 3,422           |       |                    | 1,668 | 5,663  | 66    | 73.09  | 35.63  | 120.96 | 54     |        |    |
| 2004                            | 3,177           |       |                    | 1,638 | 5,551  | 72    | 66.71  | 34.40  | 116.57 | 59     |        |    |
| 2005                            | 3,048           |       |                    | 1,592 | 5,452  | 75    | 63.43  | 33.14  | 113.48 | 64     |        |    |
| 2006                            | 2,907           | 1,537 | 5,313              | 79    | 61.08  | 32.28 | 111.60 | 65     |        |        |        |    |
| 2007                            | 2,777           | 1,469 | 5,173              | 80    | 59.27  | 31.36 | 110.40 | 66     |        |        |        |    |

| Metropolitan Statistical Area   | PWID Population    | Year | Number   | Min   | Max   | Rank | Rate   | Min    | Max    | Rank  |        |    |
|---------------------------------|--------------------|------|----------|-------|-------|------|--------|--------|--------|-------|--------|----|
| West Palm Beach--Boca Raton, FL | Non-Hispanic Black | 1992 | 1,787    | 995   | 2,424 | 61   | 247.34 | 137.79 | 335.48 | 61    |        |    |
|                                 |                    | 1993 | 1,245    | 311   | 1,988 | 65   | 163.99 | 40.96  | 261.84 | 82    |        |    |
|                                 |                    | 1994 | 1,413    | 958   | 1,683 | 63   | 176.45 | 119.62 | 210.18 | 76    |        |    |
|                                 |                    | 1995 | 1,077    | 329   | 1,524 | 67   | 128.12 | 39.13  | 181.25 | 88    |        |    |
|                                 |                    | 1996 | 1,050    | 347   | 1,487 | 67   | 119.68 | 39.60  | 169.59 | 87    |        |    |
|                                 |                    | 1997 | 1,051    | 372   | 1,492 | 65   | 113.69 | 40.21  | 161.39 | 85    |        |    |
|                                 |                    | 1998 | 1,072    | 402   | 1,514 | 65   | 110.40 | 41.35  | 155.88 | 84    |        |    |
|                                 |                    | 1999 | 1,312    | 1,033 | 1,540 | 61   | 129.04 | 101.59 | 151.40 | 78    |        |    |
|                                 |                    | 2000 | 1,077    | 455   | 1,539 | 64   | 102.38 | 43.29  | 146.29 | 82    |        |    |
|                                 |                    | 2001 | 1,222    | 878   | 1,522 | 62   | 112.22 | 80.56  | 139.71 | 79    |        |    |
|                                 |                    | 2002 | 955      | 436   | 1,481 | 64   | 84.47  | 38.62  | 131.04 | 87    |        |    |
|                                 |                    | 2003 | 845      | 412   | 1,399 | 68   | 72.05  | 35.13  | 119.25 | 89    |        |    |
|                                 |                    | 2004 | 735      | 379   | 1,285 | 72   | 59.91  | 30.90  | 104.69 | 92    |        |    |
|                                 |                    | 2005 | 628      | 328   | 1,123 | 77   | 49.39  | 25.80  | 88.36  | 95    |        |    |
|                                 |                    | 2006 | 503      | 266   | 919   | 85   | 38.59  | 20.39  | 70.52  | 100   |        |    |
|                                 |                    | 2007 | 378      | 200   | 704   | 91   | 28.71  | 15.19  | 53.48  | 100   |        |    |
|                                 |                    |      | Hispanic | 1992  | 469   | 261  | 636    | 55     | 87.18  | 48.57 | 118.25 | 65 |
|                                 |                    |      |          | 1993  | 376   | 94   | 601    | 57     | 64.64  | 16.15 | 103.21 | 68 |
|                                 |                    |      |          | 1994  | 486   | 329  | 578    | 54     | 77.30  | 52.40 | 92.07  | 67 |
|                                 |                    |      |          | 1995  | 414   | 126  | 586    | 56     | 60.94  | 18.61 | 86.21  | 71 |
| 1996                            | 444                |      |          | 147   | 629   | 56   | 60.45  | 20.00  | 85.66  | 68    |        |    |
| 1997                            | 480                |      |          | 170   | 682   | 54   | 60.70  | 21.46  | 86.16  | 65    |        |    |
| 1998                            | 520                |      |          | 195   | 734   | 54   | 61.38  | 22.99  | 86.67  | 62    |        |    |
| 1999                            | 664                |      |          | 523   | 779   | 52   | 72.87  | 57.37  | 85.50  | 60    |        |    |
| 2000                            | 560                |      |          | 237   | 800   | 56   | 57.15  | 24.16  | 81.65  | 63    |        |    |
| 2001                            | 642                |      |          | 461   | 799   | 54   | 61.13  | 43.88  | 76.10  | 62    |        |    |
| 2002                            | 498                |      |          | 228   | 773   | 57   | 44.20  | 20.21  | 68.58  | 67    |        |    |
| 2003                            | 433                |      |          | 211   | 716   | 60   | 35.93  | 17.52  | 59.47  | 75    |        |    |
| 2004                            | 364                |      |          | 188   | 636   | 63   | 28.29  | 14.59  | 49.43  | 81    |        |    |
| 2005                            | 296                |      |          | 155   | 529   | 66   | 21.81  | 11.39  | 39.01  | 91    |        |    |
| 2006                            | 222                |      |          | 117   | 406   | 71   | 15.75  | 8.32   | 28.78  | 96    |        |    |
| 2007                            | 154                | 82   | 287      | 77    | 10.63 | 5.63 | 19.81  | 99     |        |       |        |    |

| Metropolitan Statistical Area   | PWID Population | Year   | Number | Min   | Max   | Rank  | Rate   | Min    | Max    | Rank   |    |
|---------------------------------|-----------------|--------|--------|-------|-------|-------|--------|--------|--------|--------|----|
| West Palm Beach--Boca Raton, FL | Male            | 1992   | 5,883  | 3,277 | 7,979 | 49    | 222.55 | 123.98 | 301.86 | 25     |    |
|                                 |                 | 1993   | 4,669  | 1,166 | 7,454 | 55    | 172.01 | 42.96  | 274.65 | 36     |    |
|                                 |                 | 1994   | 5,749  | 3,898 | 6,849 | 47    | 205.59 | 139.38 | 244.90 | 28     |    |
|                                 |                 | 1995   | 4,565  | 1,394 | 6,458 | 55    | 158.96 | 48.55  | 224.87 | 40     |    |
|                                 |                 | 1996   | 4,484  | 1,484 | 6,354 | 59    | 152.30 | 50.39  | 215.80 | 42     |    |
|                                 |                 | 1997   | 4,413  | 1,561 | 6,264 | 59    | 144.98 | 51.27  | 205.81 | 44     |    |
|                                 |                 | 1998   | 4,350  | 1,629 | 6,142 | 58    | 138.65 | 51.94  | 195.78 | 44     |    |
|                                 |                 | 1999   | 5,103  | 4,017 | 5,987 | 53    | 158.15 | 124.50 | 185.55 | 36     |    |
|                                 |                 | 2000   | 4,018  | 1,699 | 5,741 | 63    | 121.51 | 51.37  | 173.63 | 49     |    |
|                                 |                 | 2001   | 4,414  | 3,169 | 5,496 | 61    | 130.17 | 93.44  | 162.05 | 48     |    |
|                                 |                 | 2002   | 3,399  | 1,554 | 5,273 | 73    | 97.23  | 44.46  | 150.83 | 65     |    |
|                                 |                 | 2003   | 3,050  | 1,487 | 5,048 | 81    | 84.86  | 41.37  | 140.44 | 69     |    |
|                                 |                 | 2004   | 2,790  | 1,439 | 4,875 | 85    | 75.09  | 38.73  | 131.22 | 78     |    |
|                                 |                 | 2005   | 2,621  | 1,369 | 4,688 | 86    | 68.88  | 35.98  | 123.22 | 85     |    |
|                                 | 2006            | 2,436  | 1,288  | 4,452 | 87    | 63.50 | 33.56  | 116.03 | 93     |        |    |
|                                 | 2007            | 2,263  | 1,197  | 4,216 | 88    | 59.01 | 31.22  | 109.92 | 96     |        |    |
|                                 |                 | Female | 1992   | 3,409 | 1,899 | 4,623 | 43     | 125.05 | 69.66  | 169.61 | 21 |
|                                 |                 |        | 1993   | 2,601 | 650   | 4,154 | 54     | 93.02  | 23.23  | 148.52 | 32 |
|                                 |                 |        | 1994   | 3,158 | 2,141 | 3,762 | 45     | 109.50 | 74.23  | 130.43 | 22 |
|                                 |                 |        | 1995   | 2,524 | 771   | 3,570 | 55     | 85.17  | 26.02  | 120.49 | 37 |
|                                 |                 |        | 1996   | 2,537 | 839   | 3,594 | 56     | 83.52  | 27.63  | 118.34 | 39 |
|                                 |                 |        | 1997   | 2,587 | 915   | 3,672 | 56     | 82.44  | 29.16  | 117.03 | 41 |
|                                 |                 |        | 1998   | 2,665 | 998   | 3,762 | 54     | 82.43  | 30.88  | 116.39 | 43 |
|                                 |                 |        | 1999   | 3,281 | 2,583 | 3,850 | 46     | 98.79  | 77.78  | 115.91 | 25 |
|                                 |                 |        | 2000   | 2,713 | 1,147 | 3,876 | 55     | 79.75  | 33.72  | 113.96 | 42 |
|                                 |                 |        | 2001   | 3,118 | 2,238 | 3,882 | 48     | 89.65  | 64.36  | 111.61 | 32 |
|                                 | 2002            |        | 2,492  | 1,140 | 3,866 | 62    | 69.74  | 31.89  | 108.19 | 49     |    |
|                                 | 2003            |        | 2,294  | 1,118 | 3,796 | 65    | 62.81  | 30.62  | 103.96 | 58     |    |
|                                 | 2004            | 2,118  | 1,092  | 3,700 | 68    | 56.32 | 29.04  | 98.41  | 62     |        |    |
|                                 | 2005            | 1,968  | 1,028  | 3,521 | 79    | 51.27 | 26.78  | 91.72  | 67     |        |    |
|                                 | 2006            | 1,767  | 934    | 3,228 | 81    | 45.82 | 24.21  | 83.72  | 79     |        |    |
|                                 | 2007            | 1,540  | 815    | 2,869 | 85    | 40.10 | 21.21  | 74.69  | 85     |        |    |

| Metropolitan Statistical Area   | PWID Population | Year  | Number      | Min   | Max   | Rank  | Rate   | Min    | Max    | Rank   |        |    |
|---------------------------------|-----------------|-------|-------------|-------|-------|-------|--------|--------|--------|--------|--------|----|
| West Palm Beach--Boca Raton, FL | Young (15-29)   | 1992  | 2,022       | 1,127 | 2,743 | 54    | 129.79 | 72.30  | 176.04 | 26     |        |    |
|                                 |                 | 1993  | 1,578       | 394   | 2,520 | 64    | 101.14 | 25.26  | 161.49 | 43     |        |    |
|                                 |                 | 1994  | 1,993       | 1,351 | 2,374 | 52    | 127.08 | 86.15  | 151.38 | 24     |        |    |
|                                 |                 | 1995  | 1,679       | 513   | 2,375 | 59    | 106.38 | 32.49  | 150.49 | 37     |        |    |
|                                 |                 | 1996  | 1,796       | 594   | 2,545 | 59    | 112.35 | 37.17  | 159.19 | 35     |        |    |
|                                 |                 | 1997  | 1,960       | 693   | 2,782 | 55    | 119.77 | 42.36  | 170.02 | 31     |        |    |
|                                 |                 | 1998  | 2,164       | 811   | 3,055 | 53    | 129.07 | 48.35  | 182.25 | 25     |        |    |
|                                 |                 | 1999  | 2,851       | 2,245 | 3,345 | 40    | 166.46 | 131.05 | 195.30 | 14     |        |    |
|                                 |                 | 2000  | 2,511       | 1,062 | 3,588 | 47    | 144.12 | 60.93  | 205.92 | 19     |        |    |
|                                 |                 | 2001  | 3,054       | 2,192 | 3,802 | 41    | 170.96 | 122.72 | 212.84 | 14     |        |    |
|                                 |                 | 2002  | 2,563       | 1,172 | 3,975 | 48    | 137.86 | 63.04  | 213.86 | 26     |        |    |
|                                 |                 | 2003  | 2,454       | 1,197 | 4,062 | 53    | 127.20 | 62.01  | 210.52 | 26     |        |    |
|                                 |                 | 2004  | 2,338       | 1,206 | 4,085 | 61    | 115.28 | 59.45  | 201.44 | 39     |        |    |
|                                 |                 | 2005  | 2,222       | 1,161 | 3,974 | 68    | 106.15 | 55.46  | 189.90 | 45     |        |    |
|                                 |                 | 2006  | 2,020       | 1,068 | 3,691 | 74    | 95.31  | 50.37  | 174.17 | 51     |        |    |
|                                 |                 | 2007  | 1,765       | 934   | 3,288 | 79    | 83.08  | 43.95  | 154.75 | 56     |        |    |
|                                 |                 |       | Old (30-64) | 1992  | 7,359 | 4,099 | 9,981  | 46     | 193.10 | 107.57 | 261.91 | 24 |
|                                 |                 |       |             | 1993  | 5,734 | 1,432 | 9,156  | 53     | 145.16 | 36.26  | 231.77 | 36 |
|                                 |                 |       |             | 1994  | 6,947 | 4,710 | 8,275  | 49     | 168.93 | 114.52 | 201.22 | 28 |
|                                 |                 |       |             | 1995  | 5,429 | 1,658 | 7,680  | 56     | 127.55 | 38.96  | 180.44 | 40 |
| 1996                            | 5,243           |       |             | 1,735 | 7,429 | 57    | 119.64 | 39.58  | 169.52 | 42     |        |    |
| 1997                            | 5,061           |       |             | 1,790 | 7,185 | 60    | 111.37 | 39.38  | 158.09 | 45     |        |    |
| 1998                            | 4,876           |       |             | 1,826 | 6,885 | 61    | 103.90 | 38.92  | 146.70 | 49     |        |    |
| 1999                            | 5,565           |       |             | 4,381 | 6,530 | 54    | 115.10 | 90.61  | 135.04 | 42     |        |    |
| 2000                            | 4,241           |       |             | 1,793 | 6,060 | 66    | 85.42  | 36.11  | 122.05 | 59     |        |    |
| 2001                            | 4,490           |       |             | 3,223 | 5,590 | 67    | 88.33  | 63.41  | 109.97 | 57     |        |    |
| 2002                            | 3,318           |       |             | 1,517 | 5,147 | 79    | 63.67  | 29.11  | 98.77  | 71     |        |    |
| 2003                            | 2,850           |       |             | 1,389 | 4,717 | 81    | 53.61  | 26.13  | 88.73  | 81     |        |    |
| 2004                            | 2,495           |       |             | 1,287 | 4,359 | 86    | 45.80  | 23.62  | 80.03  | 91     |        |    |
| 2005                            | 2,248           |       |             | 1,174 | 4,021 | 87    | 40.49  | 21.15  | 72.44  | 95     |        |    |
| 2006                            | 2,014           | 1,064 | 3,680       | 87    | 36.13 | 19.09 | 66.02  | 95     |        |        |        |    |
| 2007                            | 1,817           | 961   | 3,385       | 91    | 32.73 | 17.32 | 60.97  | 95     |        |        |        |    |

| Metropolitan Statistical Area | PWID Population | Year  | Number             | Min   | Max   | Rank  | Rate   | Min   | Max    | Rank  |       |    |
|-------------------------------|-----------------|-------|--------------------|-------|-------|-------|--------|-------|--------|-------|-------|----|
| Wichita, KS                   | Total           | 1992  | 1,686              | 1,040 | 2,512 | 97    | 52.23  | 32.21 | 77.81  | 95    |       |    |
|                               |                 | 1993  | 1,809              | 1,097 | 2,457 | 97    | 55.35  | 33.57 | 75.18  | 88    |       |    |
|                               |                 | 1994  | 1,722              | 1,158 | 2,401 | 97    | 52.29  | 35.17 | 72.91  | 94    |       |    |
|                               |                 | 1995  | 1,883              | 1,223 | 2,349 | 96    | 56.62  | 36.76 | 70.64  | 84    |       |    |
|                               |                 | 1996  | 1,934              | 1,296 | 2,398 | 96    | 57.42  | 38.47 | 71.19  | 83    |       |    |
|                               |                 | 1997  | 1,986              | 1,374 | 2,485 | 96    | 58.11  | 40.18 | 72.70  | 82    |       |    |
|                               |                 | 1998  | 2,066              | 1,526 | 2,586 | 94    | 59.27  | 43.78 | 74.21  | 80    |       |    |
|                               |                 | 1999  | 1,946              | 1,666 | 2,258 | 98    | 55.35  | 47.38 | 64.22  | 88    |       |    |
|                               |                 | 2000  | 2,232              | 1,797 | 2,737 | 93    | 63.16  | 50.84 | 77.45  | 73    |       |    |
|                               |                 | 2001  | 2,188              | 1,934 | 2,605 | 97    | 61.44  | 54.30 | 73.13  | 79    |       |    |
|                               |                 | 2002  | 2,403              | 2,034 | 2,854 | 94    | 66.71  | 56.47 | 79.23  | 70    |       |    |
|                               |                 | 2003  | 2,479              | 2,121 | 3,086 | 94    | 68.54  | 58.64 | 85.33  | 70    |       |    |
|                               |                 | 2004  | 2,552              | 2,173 | 3,345 | 94    | 70.18  | 59.76 | 92.01  | 67    |       |    |
|                               |                 | 2005  | 2,625              | 2,230 | 3,615 | 93    | 71.67  | 60.88 | 98.69  | 66    |       |    |
|                               |                 | 2006  | 2,710              | 2,282 | 3,928 | 94    | 73.29  | 61.70 | 106.22 | 67    |       |    |
|                               |                 | 2007  | 2,801              | 2,174 | 4,261 | 94    | 74.79  | 58.05 | 113.75 | 65    |       |    |
|                               |                 |       | Non-Hispanic White | 1992  | 1,142 | 704   | 1,701  | 98    | 41.60  | 25.65 | 61.97 | 85 |
|                               |                 |       |                    | 1993  | 1,219 | 739   | 1,655  | 96    | 44.07  | 26.73 | 59.87 | 77 |
|                               |                 |       |                    | 1994  | 1,164 | 783   | 1,624  | 97    | 42.07  | 28.29 | 58.66 | 83 |
|                               |                 |       |                    | 1995  | 1,287 | 836   | 1,606  | 95    | 46.32  | 30.07 | 57.79 | 73 |
| 1996                          | 1,342           |       |                    | 899   | 1,664 | 94    | 47.98  | 32.15 | 59.49  | 69    |       |    |
| 1997                          | 1,402           |       |                    | 970   | 1,754 | 92    | 49.71  | 34.37 | 62.19  | 69    |       |    |
| 1998                          | 1,484           |       |                    | 1,096 | 1,858 | 91    | 52.03  | 38.43 | 65.15  | 67    |       |    |
| 1999                          | 1,422           |       |                    | 1,217 | 1,650 | 92    | 49.82  | 42.64 | 57.81  | 72    |       |    |
| 2000                          | 1,655           |       |                    | 1,332 | 2,029 | 89    | 58.21  | 46.86 | 71.38  | 65    |       |    |
| 2001                          | 1,640           |       |                    | 1,450 | 1,952 | 92    | 57.51  | 50.83 | 68.46  | 67    |       |    |
| 2002                          | 1,812           |       |                    | 1,534 | 2,152 | 89    | 63.17  | 53.47 | 75.02  | 61    |       |    |
| 2003                          | 1,871           |       |                    | 1,601 | 2,329 | 91    | 65.19  | 55.77 | 81.16  | 59    |       |    |
| 2004                          | 1,914           |       |                    | 1,630 | 2,509 | 92    | 66.61  | 56.72 | 87.33  | 60    |       |    |
| 2005                          | 1,939           |       |                    | 1,647 | 2,671 | 87    | 67.22  | 57.11 | 92.57  | 60    |       |    |
| 2006                          | 1,951           |       |                    | 1,642 | 2,828 | 87    | 67.32  | 56.66 | 97.56  | 60    |       |    |
| 2007                          | 1,937           | 1,503 | 2,946              | 89    | 66.28 | 51.44 | 100.80 | 63    |        |       |       |    |

| Metropolitan Statistical Area | PWID Population    | Year | Number   | Min  | Max   | Rank  | Rate   | Min    | Max    | Rank  |       |    |
|-------------------------------|--------------------|------|----------|------|-------|-------|--------|--------|--------|-------|-------|----|
| Wichita, KS                   | Non-Hispanic Black | 1992 | 412      | 254  | 614   | 94    | 171.48 | 105.75 | 255.48 | 83    |       |    |
|                               |                    | 1993 | 426      | 258  | 579   | 94    | 174.30 | 105.71 | 236.77 | 78    |       |    |
|                               |                    | 1994 | 375      | 252  | 523   | 95    | 151.00 | 101.55 | 210.55 | 85    |       |    |
|                               |                    | 1995 | 366      | 237  | 456   | 95    | 145.17 | 94.25  | 181.11 | 81    |       |    |
|                               |                    | 1996 | 326      | 218  | 404   | 95    | 127.00 | 85.10  | 157.46 | 83    |       |    |
|                               |                    | 1997 | 284      | 196  | 355   | 95    | 109.03 | 75.39  | 136.40 | 87    |       |    |
|                               |                    | 1998 | 248      | 183  | 310   | 96    | 92.00  | 67.95  | 115.18 | 92    |       |    |
|                               |                    | 1999 | 195      | 167  | 226   | 97    | 71.08  | 60.84  | 82.47  | 94    |       |    |
|                               |                    | 2000 | 189      | 152  | 232   | 96    | 67.83  | 54.60  | 83.18  | 93    |       |    |
|                               |                    | 2001 | 160      | 141  | 190   | 97    | 56.56  | 49.99  | 67.32  | 95    |       |    |
|                               |                    | 2002 | 157      | 133  | 186   | 98    | 54.26  | 45.93  | 64.45  | 93    |       |    |
|                               |                    | 2003 | 151      | 129  | 188   | 98    | 52.28  | 44.72  | 65.08  | 93    |       |    |
|                               |                    | 2004 | 153      | 131  | 201   | 98    | 52.34  | 44.57  | 68.62  | 95    |       |    |
|                               |                    | 2005 | 167      | 142  | 230   | 98    | 56.71  | 48.18  | 78.10  | 92    |       |    |
|                               |                    | 2006 | 198      | 166  | 286   | 98    | 65.53  | 55.16  | 94.97  | 91    |       |    |
|                               |                    | 2007 | 255      | 198  | 388   | 98    | 83.45  | 64.77  | 126.92 | 79    |       |    |
|                               |                    |      | Hispanic | 1992 | 49    | 30    | 73     | 86     | 35.57  | 21.94 | 53.00 | 93 |
|                               |                    |      |          | 1993 | 56    | 34    | 76     | 84     | 37.72  | 22.88 | 51.24 | 88 |
|                               |                    |      |          | 1994 | 55    | 37    | 77     | 86     | 34.89  | 23.47 | 48.65 | 92 |
|                               |                    |      |          | 1995 | 62    | 40    | 77     | 84     | 36.27  | 23.55 | 45.25 | 87 |
| 1996                          | 64                 |      |          | 43   | 80    | 84    | 34.91  | 23.39  | 43.28  | 87    |       |    |
| 1997                          | 66                 |      |          | 46   | 82    | 84    | 33.13  | 22.91  | 41.45  | 86    |       |    |
| 1998                          | 68                 |      |          | 50   | 85    | 83    | 31.32  | 23.13  | 39.21  | 86    |       |    |
| 1999                          | 63                 |      |          | 54   | 73    | 87    | 27.13  | 23.22  | 31.48  | 89    |       |    |
| 2000                          | 71                 |      |          | 57   | 88    | 84    | 28.55  | 22.98  | 35.01  | 84    |       |    |
| 2001                          | 69                 |      |          | 61   | 82    | 88    | 26.44  | 23.36  | 31.47  | 87    |       |    |
| 2002                          | 75                 |      |          | 64   | 90    | 86    | 27.55  | 23.32  | 32.72  | 84    |       |    |
| 2003                          | 78                 |      |          | 67   | 97    | 87    | 27.38  | 23.43  | 34.09  | 84    |       |    |
| 2004                          | 82                 |      |          | 70   | 107   | 87    | 27.69  | 23.58  | 36.31  | 83    |       |    |
| 2005                          | 87                 |      |          | 74   | 120   | 86    | 28.41  | 24.13  | 39.12  | 80    |       |    |
| 2006                          | 96                 |      |          | 81   | 139   | 85    | 29.86  | 25.13  | 43.27  | 80    |       |    |
| 2007                          | 108                | 84   | 164      | 84   | 32.03 | 24.86 | 48.71  | 76     |        |       |       |    |

| Metropolitan Statistical Area | PWID Population | Year   | Number | Min   | Max   | Rank  | Rate  | Min    | Max    | Rank  |    |
|-------------------------------|-----------------|--------|--------|-------|-------|-------|-------|--------|--------|-------|----|
| Wichita, KS                   | Male            | 1992   | 1,178  | 726   | 1,755 | 98    | 72.85 | 44.93  | 108.53 | 95    |    |
|                               |                 | 1993   | 1,214  | 736   | 1,649 | 98    | 74.11 | 44.95  | 100.68 | 88    |    |
|                               |                 | 1994   | 1,112  | 748   | 1,551 | 98    | 67.29 | 45.25  | 93.82  | 95    |    |
|                               |                 | 1995   | 1,174  | 763   | 1,465 | 98    | 70.36 | 45.68  | 87.78  | 89    |    |
|                               |                 | 1996   | 1,169  | 783   | 1,449 | 98    | 69.15 | 46.34  | 85.74  | 88    |    |
|                               |                 | 1997   | 1,168  | 808   | 1,461 | 98    | 68.07 | 47.07  | 85.16  | 87    |    |
|                               |                 | 1998   | 1,188  | 877   | 1,487 | 97    | 67.82 | 50.09  | 84.91  | 86    |    |
|                               |                 | 1999   | 1,099  | 941   | 1,276 | 99    | 62.14 | 53.19  | 72.10  | 96    |    |
|                               |                 | 2000   | 1,245  | 1,002 | 1,527 | 98    | 69.96 | 56.31  | 85.79  | 82    |    |
|                               |                 | 2001   | 1,212  | 1,071 | 1,442 | 99    | 67.51 | 59.66  | 80.35  | 89    |    |
|                               |                 | 2002   | 1,327  | 1,124 | 1,577 | 96    | 73.12 | 61.89  | 86.84  | 79    |    |
|                               |                 | 2003   | 1,373  | 1,174 | 1,709 | 96    | 75.40 | 64.50  | 93.86  | 76    |    |
|                               |                 | 2004   | 1,423  | 1,212 | 1,865 | 97    | 77.68 | 66.15  | 101.84 | 74    |    |
|                               |                 | 2005   | 1,480  | 1,257 | 2,038 | 96    | 80.21 | 68.14  | 110.46 | 73    |    |
|                               | 2006            | 1,551  | 1,305  | 2,247 | 96    | 83.03 | 69.89 | 120.33 | 69     |       |    |
|                               | 2007            | 1,632  | 1,266  | 2,482 | 94    | 86.36 | 67.03 | 131.35 | 68     |       |    |
|                               |                 | Female | 1992   | 500   | 308   | 744   | 99    | 31.00  | 19.12  | 46.19 | 95 |
|                               |                 |        | 1993   | 588   | 357   | 799   | 96    | 36.07  | 21.87  | 48.99 | 86 |
|                               |                 |        | 1994   | 606   | 408   | 845   | 97    | 36.98  | 24.87  | 51.56 | 87 |
|                               |                 |        | 1995   | 710   | 461   | 885   | 95    | 42.85  | 27.82  | 53.45 | 83 |
|                               |                 |        | 1996   | 771   | 517   | 956   | 95    | 45.97  | 30.80  | 57.00 | 80 |
|                               |                 |        | 1997   | 830   | 574   | 1,038 | 95    | 48.75  | 33.71  | 60.99 | 74 |
|                               |                 |        | 1998   | 895   | 661   | 1,120 | 94    | 51.61  | 38.12  | 64.62 | 69 |
|                               |                 |        | 1999   | 866   | 741   | 1,005 | 96    | 49.58  | 42.44  | 57.53 | 77 |
|                               |                 |        | 2000   | 1,011 | 814   | 1,240 | 92    | 57.66  | 46.41  | 70.71 | 63 |
|                               |                 |        | 2001   | 1,001 | 884   | 1,191 | 95    | 56.65  | 50.07  | 67.44 | 67 |
|                               | 2002            |        | 1,099  | 931   | 1,306 | 93    | 61.55 | 52.10  | 73.10  | 59    |    |
|                               | 2003            |        | 1,125  | 962   | 1,400 | 92    | 62.63 | 53.58  | 77.97  | 59    |    |
|                               | 2004            | 1,138  | 969    | 1,492 | 92    | 63.05 | 53.69 | 82.67  | 57     |       |    |
|                               | 2005            | 1,139  | 967    | 1,568 | 92    | 62.63 | 53.21 | 86.25  | 53     |       |    |
|                               | 2006            | 1,132  | 953    | 1,640 | 93    | 61.82 | 52.04 | 89.60  | 56     |       |    |
|                               | 2007            | 1,113  | 864    | 1,692 | 94    | 59.95 | 46.53 | 91.18  | 53     |       |    |



| Metropolitan Statistical Area | PWID Population | Year  | Number      | Min   | Max   | Rank  | Rate   | Min   | Max    | Rank  |       |    |
|-------------------------------|-----------------|-------|-------------|-------|-------|-------|--------|-------|--------|-------|-------|----|
| Wichita, KS                   | Young (15-29)   | 1992  | 600         | 370   | 895   | 94    | 56.09  | 34.59 | 83.56  | 75    |       |    |
|                               |                 | 1993  | 588         | 357   | 799   | 92    | 55.14  | 33.44 | 74.90  | 68    |       |    |
|                               |                 | 1994  | 532         | 358   | 742   | 95    | 50.02  | 33.64 | 69.75  | 77    |       |    |
|                               |                 | 1995  | 573         | 372   | 715   | 93    | 53.68  | 34.86 | 66.98  | 66    |       |    |
|                               |                 | 1996  | 597         | 400   | 740   | 93    | 55.14  | 36.94 | 68.36  | 67    |       |    |
|                               |                 | 1997  | 635         | 439   | 795   | 93    | 57.62  | 39.85 | 72.09  | 67    |       |    |
|                               |                 | 1998  | 693         | 512   | 868   | 92    | 61.47  | 45.40 | 76.96  | 66    |       |    |
|                               |                 | 1999  | 689         | 590   | 799   | 93    | 60.62  | 51.89 | 70.33  | 69    |       |    |
|                               |                 | 2000  | 831         | 669   | 1,019 | 89    | 73.13  | 58.87 | 89.68  | 61    |       |    |
|                               |                 | 2001  | 848         | 750   | 1,010 | 93    | 74.60  | 65.93 | 88.80  | 66    |       |    |
|                               |                 | 2002  | 955         | 808   | 1,134 | 91    | 83.10  | 70.34 | 98.70  | 61    |       |    |
|                               |                 | 2003  | 988         | 845   | 1,230 | 93    | 86.29  | 73.82 | 107.42 | 60    |       |    |
|                               |                 | 2004  | 992         | 845   | 1,300 | 94    | 86.33  | 73.52 | 113.19 | 59    |       |    |
|                               |                 | 2005  | 959         | 815   | 1,320 | 95    | 83.09  | 70.59 | 114.43 | 66    |       |    |
|                               |                 | 2006  | 887         | 747   | 1,285 | 99    | 75.92  | 63.91 | 110.03 | 67    |       |    |
|                               |                 | 2007  | 771         | 599   | 1,173 | 99    | 65.15  | 50.57 | 99.09  | 83    |       |    |
|                               |                 |       | Old (30-64) | 1992  | 1,102 | 679   | 1,641  | 98    | 51.05  | 31.48 | 76.06 | 97 |
|                               |                 |       |             | 1993  | 1,232 | 747   | 1,673  | 98    | 55.95  | 33.93 | 76.00 | 93 |
|                               |                 |       |             | 1994  | 1,198 | 806   | 1,671  | 98    | 53.75  | 36.15 | 74.95 | 95 |
|                               |                 |       |             | 1995  | 1,320 | 857   | 1,647  | 97    | 58.46  | 37.96 | 72.94 | 92 |
| 1996                          | 1,351           |       |             | 905   | 1,675 | 97    | 59.11  | 39.61 | 73.29  | 88    |       |    |
| 1997                          | 1,370           |       |             | 948   | 1,714 | 98    | 59.17  | 40.92 | 74.03  | 87    |       |    |
| 1998                          | 1,398           |       |             | 1,033 | 1,751 | 98    | 59.32  | 43.82 | 74.27  | 85    |       |    |
| 1999                          | 1,287           |       |             | 1,102 | 1,493 | 98    | 54.09  | 46.30 | 62.76  | 89    |       |    |
| 2000                          | 1,441           |       |             | 1,160 | 1,767 | 97    | 60.06  | 48.35 | 73.66  | 80    |       |    |
| 2001                          | 1,381           |       |             | 1,221 | 1,644 | 98    | 56.96  | 50.33 | 67.79  | 85    |       |    |
| 2002                          | 1,492           |       |             | 1,263 | 1,772 | 96    | 60.83  | 51.49 | 72.24  | 76    |       |    |
| 2003                          | 1,530           |       |             | 1,309 | 1,905 | 94    | 61.92  | 52.97 | 77.08  | 75    |       |    |
| 2004                          | 1,589           |       |             | 1,353 | 2,083 | 94    | 63.87  | 54.38 | 83.73  | 68    |       |    |
| 2005                          | 1,676           |       |             | 1,424 | 2,308 | 93    | 66.82  | 56.76 | 92.02  | 62    |       |    |
| 2006                          | 1,807           |       |             | 1,521 | 2,620 | 91    | 71.45  | 60.14 | 103.55 | 58    |       |    |
| 2007                          | 1,981           | 1,537 | 3,013       | 88    | 77.34 | 60.02 | 117.62 | 49    |        |       |       |    |

| Metropolitan Statistical Area | PWID Population | Year  | Number             | Min   | Max    | Rank   | Rate   | Min    | Max    | Rank  |        |    |
|-------------------------------|-----------------|-------|--------------------|-------|--------|--------|--------|--------|--------|-------|--------|----|
| Wilmington--Newark, DE--MD    | Total           | 1992  | 5,426              | 3,331 | 6,846  | 74     | 151.77 | 93.16  | 191.47 | 32    |        |    |
|                               |                 | 1993  | 4,425              | 816   | 7,230  | 80     | 122.54 | 22.59  | 200.22 | 40    |        |    |
|                               |                 | 1994  | 5,823              | 3,607 | 7,583  | 71     | 159.44 | 98.77  | 207.61 | 23    |        |    |
|                               |                 | 1995  | 5,163              | 2,483 | 7,988  | 75     | 138.98 | 66.83  | 215.00 | 34    |        |    |
|                               |                 | 1996  | 5,518              | 3,278 | 8,359  | 70     | 146.60 | 87.09  | 222.06 | 28    |        |    |
|                               |                 | 1997  | 5,859              | 4,018 | 8,730  | 67     | 153.75 | 105.45 | 229.11 | 21    |        |    |
|                               |                 | 1998  | 6,125              | 4,213 | 8,783  | 66     | 158.83 | 109.24 | 227.75 | 16    |        |    |
|                               |                 | 1999  | 6,692              | 4,376 | 8,852  | 64     | 171.16 | 111.93 | 226.40 | 13    |        |    |
|                               |                 | 2000  | 6,589              | 4,551 | 8,881  | 63     | 166.15 | 114.77 | 223.93 | 10    |        |    |
|                               |                 | 2001  | 6,899              | 4,721 | 8,891  | 63     | 171.85 | 117.60 | 221.47 | 13    |        |    |
|                               |                 | 2002  | 6,818              | 4,821 | 9,243  | 57     | 167.99 | 118.77 | 227.72 | 9     |        |    |
|                               |                 | 2003  | 6,982              | 4,932 | 9,621  | 54     | 169.78 | 119.93 | 233.96 | 8     |        |    |
|                               |                 | 2004  | 7,093              | 5,035 | 10,045 | 54     | 170.38 | 120.94 | 241.27 | 8     |        |    |
|                               |                 | 2005  | 7,207              | 5,140 | 10,477 | 53     | 171.00 | 121.96 | 248.59 | 9     |        |    |
|                               |                 | 2006  | 7,324              | 5,243 | 10,949 | 53     | 171.91 | 123.06 | 256.99 | 9     |        |    |
|                               |                 | 2007  | 7,415              | 5,204 | 11,386 | 55     | 172.82 | 121.28 | 265.38 | 9     |        |    |
|                               |                 |       | Non-Hispanic White | 1992  | 2,644  | 1,623  | 3,336  | 74     | 92.01  | 56.48 | 116.09 | 41 |
|                               |                 |       |                    | 1993  | 2,203  | 406    | 3,599  | 74     | 76.49  | 14.10 | 124.99 | 51 |
|                               |                 |       |                    | 1994  | 2,975  | 1,843  | 3,873  | 72     | 103.07 | 63.85 | 134.20 | 34 |
|                               |                 |       |                    | 1995  | 2,714  | 1,305  | 4,198  | 72     | 93.33  | 44.88 | 144.39 | 38 |
| 1996                          | 2,988           |       |                    | 1,775 | 4,526  | 67     | 102.37 | 60.81  | 155.06 | 31    |        |    |
| 1997                          | 3,268           |       |                    | 2,242 | 4,871  | 66     | 111.79 | 76.68  | 166.59 | 25    |        |    |
| 1998                          | 3,518           |       |                    | 2,419 | 5,044  | 60     | 120.02 | 82.55  | 172.10 | 20    |        |    |
| 1999                          | 3,948           |       |                    | 2,582 | 5,222  | 53     | 134.19 | 87.75  | 177.49 | 16    |        |    |
| 2000                          | 3,983           |       |                    | 2,751 | 5,368  | 51     | 134.66 | 93.01  | 181.48 | 13    |        |    |
| 2001                          | 4,259           |       |                    | 2,914 | 5,489  | 53     | 143.32 | 98.08  | 184.70 | 13    |        |    |
| 2002                          | 4,281           |       |                    | 3,027 | 5,803  | 45     | 143.68 | 101.58 | 194.77 | 11    |        |    |
| 2003                          | 4,438           |       |                    | 3,135 | 6,116  | 45     | 148.20 | 104.68 | 204.22 | 8     |        |    |
| 2004                          | 4,542           |       |                    | 3,224 | 6,432  | 44     | 151.14 | 107.29 | 214.03 | 9     |        |    |
| 2005                          | 4,622           |       |                    | 3,297 | 6,720  | 45     | 153.36 | 109.38 | 222.95 | 9     |        |    |
| 2006                          | 4,675           | 3,346 | 6,989              | 46    | 155.09 | 111.02 | 231.84 | 9      |        |       |        |    |
| 2007                          | 4,676           | 3,281 | 7,180              | 52    | 155.52 | 109.14 | 238.82 | 11     |        |       |        |    |

| Metropolitan Statistical Area | PWID Population    | Year | Number   | Min   | Max    | Rank   | Rate   | Min    | Max    | Rank   |        |    |
|-------------------------------|--------------------|------|----------|-------|--------|--------|--------|--------|--------|--------|--------|----|
| Wilmington--Newark, DE--MD    | Non-Hispanic Black | 1992 | 2,061    | 1,265 | 2,601  | 54     | 385.38 | 236.55 | 486.20 | 33     |        |    |
|                               |                    | 1993 | 1,649    | 304   | 2,695  | 55     | 298.40 | 55.01  | 487.59 | 45     |        |    |
|                               |                    | 1994 | 2,092    | 1,296 | 2,724  | 51     | 365.31 | 226.30 | 475.67 | 25     |        |    |
|                               |                    | 1995 | 1,761    | 847   | 2,724  | 53     | 294.24 | 141.48 | 455.19 | 41     |        |    |
|                               |                    | 1996 | 1,764    | 1,048 | 2,672  | 51     | 284.05 | 168.74 | 430.26 | 34     |        |    |
|                               |                    | 1997 | 1,739    | 1,193 | 2,591  | 51     | 269.98 | 185.18 | 402.31 | 33     |        |    |
|                               |                    | 1998 | 1,679    | 1,155 | 2,407  | 53     | 251.98 | 173.30 | 361.31 | 35     |        |    |
|                               |                    | 1999 | 1,692    | 1,106 | 2,238  | 52     | 246.10 | 160.93 | 325.52 | 29     |        |    |
|                               |                    | 2000 | 1,543    | 1,066 | 2,080  | 55     | 218.22 | 150.73 | 294.10 | 35     |        |    |
|                               |                    | 2001 | 1,511    | 1,034 | 1,947  | 55     | 207.72 | 142.15 | 267.70 | 38     |        |    |
|                               |                    | 2002 | 1,419    | 1,003 | 1,923  | 56     | 190.08 | 134.39 | 257.67 | 38     |        |    |
|                               |                    | 2003 | 1,410    | 996   | 1,943  | 56     | 183.72 | 129.77 | 253.16 | 38     |        |    |
|                               |                    | 2004 | 1,429    | 1,014 | 2,023  | 56     | 180.81 | 128.34 | 256.04 | 37     |        |    |
|                               |                    | 2005 | 1,496    | 1,067 | 2,174  | 48     | 183.44 | 130.83 | 266.68 | 38     |        |    |
|                               |                    | 2006 | 1,625    | 1,163 | 2,429  | 47     | 192.70 | 137.95 | 288.08 | 36     |        |    |
|                               |                    | 2007 | 1,827    | 1,282 | 2,806  | 42     | 211.22 | 148.24 | 324.36 | 32     |        |    |
|                               |                    |      | Hispanic | 1992  | 125    | 77     | 158    | 74     | 132.04 | 81.05  | 166.58 | 51 |
|                               |                    |      |          | 1993  | 130    | 24     | 212    | 73     | 126.95 | 23.40  | 207.44 | 45 |
|                               |                    |      |          | 1994  | 208    | 129    | 271    | 68     | 186.24 | 115.37 | 242.51 | 27 |
|                               |                    |      |          | 1995  | 217    | 104    | 335    | 64     | 176.94 | 85.08  | 273.71 | 31 |
| 1996                          | 263                |      |          | 156   | 399    | 61     | 197.32 | 117.22 | 298.88 | 24     |        |    |
| 1997                          | 309                |      |          | 212   | 461    | 60     | 212.87 | 146.01 | 317.21 | 18     |        |    |
| 1998                          | 350                |      |          | 241   | 502    | 60     | 224.46 | 154.38 | 321.86 | 17     |        |    |
| 1999                          | 406                |      |          | 266   | 537    | 57     | 239.78 | 156.80 | 317.16 | 15     |        |    |
| 2000                          | 420                |      |          | 290   | 566    | 58     | 229.73 | 158.68 | 309.62 | 16     |        |    |
| 2001                          | 458                |      |          | 313   | 590    | 57     | 238.28 | 163.07 | 307.09 | 15     |        |    |
| 2002                          | 470                |      |          | 332   | 637    | 58     | 231.44 | 163.63 | 313.73 | 16     |        |    |
| 2003                          | 501                |      |          | 354   | 691    | 57     | 235.35 | 166.25 | 324.32 | 15     |        |    |
| 2004                          | 535                |      |          | 379   | 757    | 57     | 239.61 | 170.08 | 339.30 | 15     |        |    |
| 2005                          | 577                |      |          | 412   | 839    | 57     | 246.64 | 175.91 | 358.55 | 14     |        |    |
| 2006                          | 635                | 455  | 950      | 57    | 257.82 | 184.56 | 385.42 | 13     |        |        |        |    |
| 2007                          | 713                | 500  | 1,095    | 56    | 278.23 | 195.26 | 427.26 | 13     |        |        |        |    |

| Metropolitan Statistical Area | PWID Population | Year   | Number | Min   | Max   | Rank   | Rate   | Min    | Max    | Rank   |    |
|-------------------------------|-----------------|--------|--------|-------|-------|--------|--------|--------|--------|--------|----|
| Wilmington--Newark, DE--MD    | Male            | 1992   | 3,557  | 2,183 | 4,488 | 75     | 202.11 | 124.06 | 254.98 | 33     |    |
|                               |                 | 1993   | 2,928  | 540   | 4,784 | 81     | 164.71 | 30.36  | 269.14 | 38     |    |
|                               |                 | 1994   | 3,883  | 2,405 | 5,056 | 71     | 215.69 | 133.61 | 280.85 | 24     |    |
|                               |                 | 1995   | 3,463  | 1,665 | 5,357 | 73     | 189.08 | 90.92  | 292.51 | 32     |    |
|                               |                 | 1996   | 3,716  | 2,207 | 5,628 | 68     | 200.43 | 119.07 | 303.60 | 26     |    |
|                               |                 | 1997   | 3,955  | 2,713 | 5,893 | 65     | 210.95 | 144.69 | 314.36 | 20     |    |
|                               |                 | 1998   | 4,139  | 2,847 | 5,935 | 62     | 218.34 | 150.17 | 313.08 | 12     |    |
|                               |                 | 1999   | 4,521  | 2,956 | 5,979 | 60     | 235.24 | 153.83 | 311.15 | 14     |    |
|                               |                 | 2000   | 4,444  | 3,069 | 5,989 | 55     | 228.01 | 157.49 | 307.30 | 11     |    |
|                               |                 | 2001   | 4,639  | 3,175 | 5,979 | 58     | 235.39 | 161.09 | 303.36 | 13     |    |
|                               |                 | 2002   | 4,566  | 3,228 | 6,190 | 53     | 229.21 | 162.05 | 310.71 | 9      |    |
|                               |                 | 2003   | 4,651  | 3,285 | 6,409 | 53     | 230.52 | 162.84 | 317.66 | 9      |    |
|                               |                 | 2004   | 4,695  | 3,333 | 6,649 | 53     | 229.84 | 163.15 | 325.47 | 11     |    |
|                               |                 | 2005   | 4,735  | 3,377 | 6,884 | 52     | 229.27 | 163.52 | 333.30 | 11     |    |
|                               | 2006            | 4,772  | 3,416  | 7,134 | 54    | 228.55 | 163.61 | 341.67 | 11     |        |    |
|                               | 2007            | 4,786  | 3,359  | 7,349 | 54    | 227.72 | 159.81 | 349.69 | 11     |        |    |
|                               |                 | Female | 1992   | 1,960 | 1,203 | 2,473  | 67     | 107.95 | 66.26  | 136.20 | 29 |
|                               |                 |        | 1993   | 1,562 | 288   | 2,553  | 78     | 85.22  | 15.71  | 139.25 | 37 |
|                               |                 |        | 1994   | 2,019 | 1,251 | 2,629  | 68     | 109.02 | 67.53  | 141.96 | 23 |
|                               |                 |        | 1995   | 1,766 | 849   | 2,732  | 76     | 93.74  | 45.07  | 145.01 | 31 |
|                               |                 |        | 1996   | 1,869 | 1,110 | 2,831  | 76     | 97.84  | 58.12  | 148.20 | 26 |
|                               |                 |        | 1997   | 1,973 | 1,353 | 2,939  | 72     | 101.90 | 69.89  | 151.85 | 21 |
|                               |                 |        | 1998   | 2,057 | 1,415 | 2,950  | 71     | 104.91 | 72.15  | 150.43 | 17 |
|                               |                 |        | 1999   | 2,248 | 1,470 | 2,974  | 68     | 113.08 | 73.95  | 149.57 | 16 |
|                               |                 |        | 2000   | 2,220 | 1,533 | 2,992  | 66     | 110.08 | 76.03  | 148.36 | 14 |
|                               |                 |        | 2001   | 2,336 | 1,599 | 3,011  | 66     | 114.31 | 78.22  | 147.31 | 16 |
|                               | 2002            |        | 2,324  | 1,643 | 3,151 | 65     | 112.46 | 79.51  | 152.45 | 15     |    |
|                               | 2003            |        | 2,399  | 1,695 | 3,306 | 64     | 114.54 | 80.91  | 157.84 | 15     |    |
|                               | 2004            | 2,459  | 1,746  | 3,483 | 64    | 115.99 | 82.33  | 164.25 | 13     |        |    |
|                               | 2005            | 2,522  | 1,799  | 3,667 | 63    | 117.36 | 83.70  | 170.61 | 14     |        |    |
|                               | 2006            | 2,588  | 1,853  | 3,869 | 59    | 119.11 | 85.27  | 178.07 | 13     |        |    |
|                               | 2007            | 2,645  | 1,856  | 4,062 | 57    | 120.83 | 84.80  | 185.55 | 13     |        |    |

| Metropolitan Statistical Area | PWID Population | Year        | Number | Min   | Max    | Rank   | Rate   | Min    | Max    | Rank   |    |
|-------------------------------|-----------------|-------------|--------|-------|--------|--------|--------|--------|--------|--------|----|
| Wilmington--Newark, DE--MD    | Young (15-29)   | 1992        | 1,466  | 900   | 1,850  | 73     | 119.38 | 73.27  | 150.61 | 29     |    |
|                               |                 | 1993        | 1,253  | 231   | 2,048  | 76     | 103.53 | 19.08  | 169.16 | 39     |    |
|                               |                 | 1994        | 1,757  | 1,088 | 2,288  | 63     | 146.35 | 90.66  | 190.57 | 17     |    |
|                               |                 | 1995        | 1,676  | 806   | 2,593  | 60     | 139.58 | 67.12  | 215.93 | 17     |    |
|                               |                 | 1996        | 1,937  | 1,151 | 2,934  | 54     | 161.08 | 95.69  | 243.99 | 11     |    |
|                               |                 | 1997        | 2,223  | 1,525 | 3,313  | 48     | 184.30 | 126.41 | 274.65 | 6      |    |
|                               |                 | 1998        | 2,503  | 1,721 | 3,589  | 43     | 206.45 | 141.99 | 296.03 | 4      |    |
|                               |                 | 1999        | 2,921  | 1,910 | 3,864  | 39     | 239.71 | 156.75 | 317.06 | 2      |    |
|                               |                 | 2000        | 3,040  | 2,100 | 4,097  | 38     | 248.07 | 171.35 | 334.34 | 3      |    |
|                               |                 | 2001        | 3,321  | 2,272 | 4,279  | 36     | 270.85 | 185.35 | 349.06 | 2      |    |
|                               |                 | 2002        | 3,372  | 2,384 | 4,571  | 35     | 274.15 | 193.83 | 371.63 | 2      |    |
|                               |                 | 2003        | 3,487  | 2,463 | 4,805  | 36     | 279.92 | 197.73 | 385.74 | 2      |    |
|                               |                 | 2004        | 3,506  | 2,489 | 4,965  | 36     | 278.06 | 197.38 | 393.75 | 2      |    |
|                               |                 | 2005        | 3,442  | 2,454 | 5,003  | 39     | 269.05 | 191.89 | 391.13 | 4      |    |
|                               |                 | 2006        | 3,280  | 2,348 | 4,904  | 41     | 253.09 | 181.18 | 378.36 | 6      |    |
|                               | 2007            | 3,000       | 2,105  | 4,606 | 48     | 229.94 | 161.37 | 353.10 | 7      |        |    |
|                               |                 | Old (30-64) | 1992   | 4,059 | 2,492  | 5,121  | 73     | 172.95 | 106.16 | 218.20 | 32 |
|                               |                 |             | 1993   | 3,225 | 595    | 5,270  | 81     | 134.37 | 24.77  | 219.57 | 40 |
|                               |                 |             | 1994   | 4,116 | 2,550  | 5,359  | 74     | 167.87 | 103.99 | 218.58 | 29 |
|                               |                 |             | 1995   | 3,523 | 1,694  | 5,450  | 79     | 140.11 | 67.37  | 216.74 | 36 |
|                               |                 |             | 1996   | 3,620 | 2,151  | 5,483  | 78     | 141.31 | 83.95  | 214.04 | 35 |
| 1997                          |                 |             | 3,684  | 2,527 | 5,490  | 77     | 141.47 | 97.03  | 210.81 | 32     |    |
| 1998                          |                 |             | 3,686  | 2,535 | 5,286  | 77     | 139.41 | 95.88  | 199.90 | 32     |    |
| 1999                          |                 |             | 3,855  | 2,521 | 5,099  | 74     | 143.25 | 93.67  | 189.47 | 31     |    |
| 2000                          |                 |             | 3,643  | 2,517 | 4,910  | 76     | 132.95 | 91.84  | 179.19 | 33     |    |
| 2001                          |                 |             | 3,682  | 2,520 | 4,745  | 78     | 132.04 | 90.36  | 170.16 | 29     |    |
| 2002                          |                 |             | 3,543  | 2,505 | 4,802  | 77     | 125.23 | 88.54  | 169.76 | 31     |    |
| 2003                          |                 |             | 3,572  | 2,523 | 4,922  | 75     | 124.61 | 88.02  | 171.72 | 28     |    |
| 2004                          |                 |             | 3,624  | 2,573 | 5,132  | 73     | 124.87 | 88.64  | 176.83 | 26     |    |
| 2005                          |                 |             | 3,737  | 2,665 | 5,432  | 69     | 127.29 | 90.78  | 185.05 | 22     |    |
| 2006                          |                 |             | 3,920  | 2,806 | 5,860  | 65     | 132.23 | 94.66  | 197.68 | 16     |    |
| 2007                          | 4,166           | 2,924       | 6,397  | 58    | 139.52 | 97.91  | 214.25 | 11     |        |        |    |

| Metropolitan Statistical Area | PWID Population | Year  | Number             | Min   | Max   | Rank  | Rate   | Min   | Max    | Rank  |       |     |
|-------------------------------|-----------------|-------|--------------------|-------|-------|-------|--------|-------|--------|-------|-------|-----|
| Youngstown--Warren, OH        | Total           | 1992  | 1,187              | 530   | 1,704 | 100   | 30.95  | 13.83 | 44.46  | 100   |       |     |
|                               |                 | 1993  | 1,160              | 668   | 1,807 | 100   | 30.24  | 17.42 | 47.12  | 100   |       |     |
|                               |                 | 1994  | 1,451              | 822   | 1,908 | 99    | 37.85  | 21.43 | 49.79  | 99    |       |     |
|                               |                 | 1995  | 1,395              | 821   | 2,013 | 99    | 36.45  | 21.45 | 52.59  | 99    |       |     |
|                               |                 | 1996  | 1,526              | 898   | 2,126 | 99    | 39.86  | 23.46 | 55.54  | 96    |       |     |
|                               |                 | 1997  | 1,655              | 981   | 2,239 | 99    | 43.37  | 25.71 | 58.67  | 96    |       |     |
|                               |                 | 1998  | 1,809              | 1,066 | 2,363 | 98    | 47.44  | 27.97 | 61.97  | 94    |       |     |
|                               |                 | 1999  | 2,229              | 1,803 | 2,487 | 95    | 58.66  | 47.43 | 65.45  | 83    |       |     |
|                               |                 | 2000  | 2,148              | 1,253 | 2,693 | 95    | 56.75  | 33.09 | 71.13  | 81    |       |     |
|                               |                 | 2001  | 2,667              | 2,259 | 2,987 | 93    | 70.68  | 59.87 | 79.16  | 71    |       |     |
|                               |                 | 2002  | 2,491              | 1,430 | 3,360 | 93    | 66.20  | 38.02 | 89.30  | 71    |       |     |
|                               |                 | 2003  | 2,650              | 1,520 | 3,735 | 92    | 70.56  | 40.48 | 99.45  | 67    |       |     |
|                               |                 | 2004  | 2,794              | 1,599 | 4,117 | 92    | 74.60  | 42.68 | 109.91 | 66    |       |     |
|                               |                 | 2005  | 2,937              | 1,672 | 4,493 | 92    | 78.67  | 44.79 | 120.36 | 61    |       |     |
|                               |                 | 2006  | 3,083              | 1,746 | 4,883 | 92    | 82.80  | 46.90 | 131.17 | 58    |       |     |
|                               |                 | 2007  | 3,210              | 1,800 | 5,246 | 91    | 86.87  | 48.72 | 141.97 | 55    |       |     |
|                               |                 |       | Non-Hispanic White | 1992  | 648   | 289   | 931    | 100   | 18.99  | 8.48  | 27.28 | 100 |
|                               |                 |       |                    | 1993  | 612   | 353   | 953    | 100   | 17.96  | 10.35 | 27.98 | 100 |
|                               |                 |       |                    | 1994  | 753   | 426   | 990    | 100   | 22.16  | 12.55 | 29.15 | 100 |
|                               |                 |       |                    | 1995  | 723   | 426   | 1,043  | 100   | 21.36  | 12.57 | 30.82 | 100 |
| 1996                          | 801             |       |                    | 471   | 1,116 | 100   | 23.70  | 13.95 | 33.03  | 100   |       |     |
| 1997                          | 889             |       |                    | 527   | 1,203 | 98    | 26.46  | 15.68 | 35.78  | 98    |       |     |
| 1998                          | 1,003           |       |                    | 591   | 1,310 | 98    | 29.93  | 17.65 | 39.10  | 93    |       |     |
| 1999                          | 1,282           |       |                    | 1,037 | 1,430 | 96    | 38.51  | 31.14 | 42.97  | 86    |       |     |
| 2000                          | 1,285           |       |                    | 749   | 1,611 | 95    | 38.88  | 22.67 | 48.73  | 82    |       |     |
| 2001                          | 1,661           |       |                    | 1,406 | 1,860 | 91    | 50.45  | 42.73 | 56.50  | 73    |       |     |
| 2002                          | 1,612           |       |                    | 926   | 2,174 | 93    | 49.15  | 28.23 | 66.30  | 74    |       |     |
| 2003                          | 1,777           |       |                    | 1,020 | 2,505 | 92    | 54.33  | 31.17 | 76.57  | 68    |       |     |
| 2004                          | 1,935           |       |                    | 1,107 | 2,850 | 91    | 59.33  | 33.94 | 87.41  | 65    |       |     |
| 2005                          | 2,089           |       |                    | 1,189 | 3,196 | 84    | 64.34  | 36.63 | 98.44  | 62    |       |     |
| 2006                          | 2,240           |       |                    | 1,269 | 3,549 | 83    | 69.32  | 39.26 | 109.81 | 57    |       |     |
| 2007                          | 2,370           | 1,329 | 3,873              | 82    | 73.98 | 41.49 | 120.91 | 53    |        |       |       |     |

| Metropolitan Statistical Area | PWID Population    | Year | Number   | Min  | Max   | Rank  | Rate   | Min    | Max    | Rank  |        |    |
|-------------------------------|--------------------|------|----------|------|-------|-------|--------|--------|--------|-------|--------|----|
| Youngstown--Warren, OH        | Non-Hispanic Black | 1992 | 448      | 200  | 643   | 91    | 128.57 | 57.43  | 184.65 | 93    |        |    |
|                               |                    | 1993 | 457      | 263  | 712   | 92    | 129.89 | 74.83  | 202.37 | 91    |        |    |
|                               |                    | 1994 | 580      | 329  | 763   | 87    | 161.99 | 91.73  | 213.09 | 81    |        |    |
|                               |                    | 1995 | 552      | 325  | 796   | 87    | 152.10 | 89.52  | 219.43 | 78    |        |    |
|                               |                    | 1996 | 584      | 344  | 814   | 87    | 159.17 | 93.69  | 221.80 | 73    |        |    |
|                               |                    | 1997 | 601      | 356  | 813   | 86    | 162.53 | 96.36  | 219.84 | 68    |        |    |
|                               |                    | 1998 | 612      | 361  | 800   | 84    | 163.40 | 96.33  | 213.45 | 64    |        |    |
|                               |                    | 1999 | 692      | 560  | 772   | 79    | 182.31 | 147.42 | 203.42 | 57    |        |    |
|                               |                    | 2000 | 604      | 352  | 757   | 79    | 157.30 | 91.71  | 197.15 | 59    |        |    |
|                               |                    | 2001 | 672      | 569  | 753   | 75    | 175.44 | 148.60 | 196.48 | 53    |        |    |
|                               |                    | 2002 | 561      | 322  | 756   | 81    | 146.45 | 84.10  | 197.56 | 57    |        |    |
|                               |                    | 2003 | 533      | 306  | 751   | 82    | 139.44 | 80.00  | 196.52 | 58    |        |    |
|                               |                    | 2004 | 505      | 289  | 744   | 83    | 132.27 | 75.68  | 194.88 | 60    |        |    |
|                               |                    | 2005 | 484      | 275  | 740   | 85    | 126.79 | 72.18  | 193.97 | 61    |        |    |
|                               |                    | 2006 | 473      | 268  | 749   | 86    | 123.09 | 69.71  | 194.98 | 61    |        |    |
|                               |                    | 2007 | 472      | 264  | 771   | 86    | 123.20 | 69.10  | 201.35 | 62    |        |    |
|                               |                    |      | Hispanic | 1992 | 34    | 15    | 48     | 89     | 67.79  | 30.28 | 97.36  | 73 |
|                               |                    |      |          | 1993 | 33    | 19    | 51     | 89     | 63.71  | 36.70 | 99.26  | 72 |
|                               |                    |      |          | 1994 | 41    | 23    | 55     | 87     | 78.15  | 44.26 | 102.80 | 65 |
|                               |                    |      |          | 1995 | 41    | 24    | 59     | 87     | 74.20  | 43.67 | 107.05 | 59 |
| 1996                          | 46                 |      |          | 27   | 64    | 87    | 79.89  | 47.02  | 111.32 | 56    |        |    |
| 1997                          | 51                 |      |          | 30   | 69    | 88    | 86.40  | 51.22  | 116.86 | 52    |        |    |
| 1998                          | 57                 |      |          | 34   | 75    | 87    | 92.90  | 54.77  | 121.35 | 46    |        |    |
| 1999                          | 72                 |      |          | 58   | 80    | 85    | 112.91 | 91.30  | 125.98 | 38    |        |    |
| 2000                          | 70                 |      |          | 41   | 88    | 85    | 103.08 | 60.10  | 129.19 | 42    |        |    |
| 2001                          | 87                 |      |          | 74   | 98    | 83    | 124.57 | 105.51 | 139.51 | 32    |        |    |
| 2002                          | 80                 |      |          | 46   | 108   | 83    | 113.05 | 64.92  | 152.50 | 34    |        |    |
| 2003                          | 83                 |      |          | 47   | 117   | 85    | 114.02 | 65.41  | 160.69 | 33    |        |    |
| 2004                          | 82                 |      |          | 47   | 121   | 87    | 111.40 | 63.74  | 164.13 | 34    |        |    |
| 2005                          | 80                 |      |          | 45   | 122   | 88    | 105.27 | 59.93  | 161.05 | 36    |        |    |
| 2006                          | 75                 | 43   | 119      | 88   | 96.58 | 54.70 | 152.98 | 40     |        |       |        |    |
| 2007                          | 68                 | 38   | 111      | 89   | 84.68 | 47.49 | 138.39 | 45     |        |       |        |    |

| Metropolitan Statistical Area | PWID Population | Year   | Number | Min   | Max   | Rank  | Rate  | Min    | Max    | Rank  |    |
|-------------------------------|-----------------|--------|--------|-------|-------|-------|-------|--------|--------|-------|----|
| Youngstown--Warren, OH        | Male            | 1992   | 670    | 299   | 962   | 100   | 36.01 | 16.09  | 51.72  | 100   |    |
|                               |                 | 1993   | 681    | 392   | 1,061 | 100   | 36.53 | 21.05  | 56.92  | 100   |    |
|                               |                 | 1994   | 876    | 496   | 1,152 | 99    | 46.81 | 26.51  | 61.57  | 99    |    |
|                               |                 | 1995   | 856    | 504   | 1,236 | 99    | 45.68 | 26.89  | 65.90  | 99    |    |
|                               |                 | 1996   | 944    | 556   | 1,315 | 99    | 50.23 | 29.57  | 69.99  | 99    |    |
|                               |                 | 1997   | 1,025  | 608   | 1,386 | 99    | 54.57 | 32.35  | 73.80  | 96    |    |
|                               |                 | 1998   | 1,113  | 656   | 1,454 | 99    | 59.19 | 34.90  | 77.32  | 94    |    |
|                               |                 | 1999   | 1,357  | 1,097 | 1,514 | 96    | 72.13 | 58.32  | 80.48  | 86    |    |
|                               |                 | 2000   | 1,287  | 750   | 1,613 | 97    | 68.52 | 39.95  | 85.88  | 85    |    |
|                               |                 | 2001   | 1,566  | 1,326 | 1,754 | 93    | 83.59 | 70.80  | 93.62  | 76    |    |
|                               |                 | 2002   | 1,429  | 821   | 1,928 | 94    | 76.53 | 43.95  | 103.23 | 76    |    |
|                               |                 | 2003   | 1,483  | 851   | 2,090 | 94    | 79.49 | 45.61  | 112.04 | 74    |    |
|                               |                 | 2004   | 1,524  | 872   | 2,245 | 93    | 81.85 | 46.83  | 120.59 | 72    |    |
|                               |                 | 2005   | 1,561  | 889   | 2,388 | 94    | 84.05 | 47.85  | 128.59 | 67    |    |
|                               | 2006            | 1,599  | 906    | 2,533 | 94    | 86.28 | 48.86 | 136.67 | 67     |       |    |
|                               | 2007            | 1,630  | 914    | 2,664 | 95    | 88.57 | 49.67 | 144.75 | 66     |       |    |
|                               |                 | Female | 1992   | 527   | 235   | 756   | 98    | 26.68  | 11.92  | 38.32 | 99 |
|                               |                 |        | 1993   | 489   | 282   | 761   | 100   | 24.81  | 14.29  | 38.65 | 99 |
|                               |                 |        | 1994   | 590   | 334   | 776   | 98    | 30.06  | 17.02  | 39.54 | 97 |
|                               |                 |        | 1995   | 555   | 327   | 801   | 98    | 28.44  | 16.74  | 41.03 | 96 |
|                               |                 |        | 1996   | 603   | 355   | 840   | 98    | 30.94  | 18.21  | 43.11 | 93 |
|                               |                 |        | 1997   | 657   | 389   | 889   | 97    | 33.88  | 20.09  | 45.83 | 91 |
|                               |                 |        | 1998   | 728   | 429   | 951   | 96    | 37.68  | 22.21  | 49.21 | 91 |
|                               |                 |        | 1999   | 917   | 741   | 1,023 | 94    | 47.77  | 38.62  | 53.30 | 81 |
|                               |                 |        | 2000   | 908   | 529   | 1,138 | 95    | 47.58  | 27.74  | 59.64 | 74 |
|                               |                 |        | 2001   | 1,162 | 984   | 1,301 | 89    | 61.13  | 51.78  | 68.46 | 61 |
|                               | 2002            |        | 1,119  | 643   | 1,510 | 91    | 59.08 | 33.93  | 79.69  | 60    |    |
|                               | 2003            |        | 1,228  | 704   | 1,730 | 88    | 64.97 | 37.27  | 91.56  | 56    |    |
|                               | 2004            | 1,331  | 762    | 1,961 | 87    | 70.66 | 40.43 | 104.10 | 47     |       |    |
|                               | 2005            | 1,433  | 816    | 2,193 | 87    | 76.38 | 43.49 | 116.86 | 39     |       |    |
|                               | 2006            | 1,532  | 868    | 2,427 | 85    | 81.97 | 46.42 | 129.84 | 31     |       |    |
|                               | 2007            | 1,614  | 905    | 2,638 | 83    | 87.06 | 48.83 | 142.29 | 25     |       |    |



| Metropolitan Statistical Area | PWID Population | Year | Number      | Min   | Max   | Rank  | Rate   | Min   | Max    | Rank  |       |     |
|-------------------------------|-----------------|------|-------------|-------|-------|-------|--------|-------|--------|-------|-------|-----|
| Youngstown--Warren, OH        | Young (15-29)   | 1992 | 327         | 146   | 469   | 100   | 28.11  | 12.56 | 40.38  | 99    |       |     |
|                               |                 | 1993 | 242         | 140   | 378   | 100   | 21.16  | 12.19 | 32.96  | 100   |       |     |
|                               |                 | 1994 | 254         | 144   | 334   | 100   | 22.44  | 12.71 | 29.52  | 100   |       |     |
|                               |                 | 1995 | 226         | 133   | 327   | 100   | 20.16  | 11.87 | 29.09  | 99    |       |     |
|                               |                 | 1996 | 251         | 148   | 349   | 100   | 22.46  | 13.22 | 31.29  | 99    |       |     |
|                               |                 | 1997 | 296         | 176   | 401   | 100   | 26.75  | 15.86 | 36.18  | 98    |       |     |
|                               |                 | 1998 | 372         | 219   | 486   | 100   | 33.85  | 19.96 | 44.22  | 92    |       |     |
|                               |                 | 1999 | 546         | 441   | 609   | 94    | 50.30  | 40.67 | 56.12  | 81    |       |     |
|                               |                 | 2000 | 634         | 370   | 795   | 94    | 59.28  | 34.56 | 74.31  | 73    |       |     |
|                               |                 | 2001 | 945         | 800   | 1,058 | 91    | 89.22  | 75.57 | 99.92  | 55    |       |     |
|                               |                 | 2002 | 1,037       | 596   | 1,400 | 88    | 98.37  | 56.49 | 132.70 | 49    |       |     |
|                               |                 | 2003 | 1,260       | 723   | 1,775 | 86    | 119.00 | 68.27 | 167.71 | 36    |       |     |
|                               |                 | 2004 | 1,463       | 837   | 2,155 | 84    | 137.60 | 78.73 | 202.73 | 26    |       |     |
|                               |                 | 2005 | 1,632       | 929   | 2,496 | 79    | 153.10 | 87.16 | 234.22 | 21    |       |     |
|                               |                 | 2006 | 1,747       | 989   | 2,767 | 78    | 163.00 | 92.32 | 258.21 | 19    |       |     |
|                               |                 | 2007 | 1,774       | 995   | 2,899 | 78    | 166.16 | 93.19 | 271.56 | 19    |       |     |
|                               |                 |      | Old (30-64) | 1992  | 889   | 397   | 1,277  | 100   | 33.30  | 14.87 | 47.83 | 100 |
|                               |                 |      |             | 1993  | 940   | 542   | 1,465  | 100   | 34.96  | 20.14 | 54.47 | 100 |
|                               |                 |      |             | 1994  | 1,222 | 692   | 1,607  | 97    | 45.26  | 25.63 | 59.53 | 98  |
|                               |                 |      |             | 1995  | 1,194 | 703   | 1,722  | 98    | 44.12  | 25.97 | 63.66 | 96  |
| 1996                          | 1,305           |      |             | 768   | 1,819 | 98    | 48.12  | 28.33 | 67.06  | 94    |       |     |
| 1997                          | 1,397           |      |             | 828   | 1,890 | 97    | 51.57  | 30.57 | 69.75  | 94    |       |     |
| 1998                          | 1,486           |      |             | 876   | 1,941 | 96    | 54.78  | 32.29 | 71.55  | 91    |       |     |
| 1999                          | 1,756           |      |             | 1,420 | 1,960 | 94    | 64.68  | 52.30 | 72.17  | 82    |       |     |
| 2000                          | 1,594           |      |             | 929   | 1,998 | 95    | 58.69  | 34.22 | 73.57  | 83    |       |     |
| 2001                          | 1,828           |      |             | 1,548 | 2,047 | 94    | 67.35  | 57.04 | 75.42  | 78    |       |     |
| 2002                          | 1,549           |      |             | 889   | 2,089 | 95    | 57.19  | 32.84 | 77.15  | 80    |       |     |
| 2003                          | 1,475           |      |             | 846   | 2,079 | 96    | 54.69  | 31.38 | 77.08  | 78    |       |     |
| 2004                          | 1,388           |      |             | 794   | 2,045 | 97    | 51.74  | 29.60 | 76.22  | 82    |       |     |
| 2005                          | 1,316           |      |             | 749   | 2,013 | 98    | 49.33  | 28.08 | 75.47  | 86    |       |     |
| 2006                          | 1,280           | 725  | 2,028       | 97    | 48.30 | 27.35 | 76.51  | 86    |        |       |       |     |
| 2007                          | 1,292           | 725  | 2,112       | 96    | 49.18 | 27.58 | 80.38  | 78    |        |       |       |     |
